# Supplementary material
Source: PubMed Central journal article supplement (PMC7200280)
Supplement: NIHMS1576805-supplement-Supp_info.pdf [file NIHMS1576805-supplement-Supp_info.pdf]

## Contents

|                                          |      |
|------------------------------------------|------|
| Materials and experimental details ..... | S1   |
| General procedures .....                 | S3   |
| <i>Mechanistic studies</i> .....         | S4   |
| <i>Amine products</i> .....              | S19  |
| X-ray crystallographic data .....        | S127 |
| Computational data .....                 | S135 |
| NMR Spectroscopic data .....             | S169 |
| References .....                         | S395 |

### Materials and experimental details

**Materials:** Acridines **A1** and **A2**,<sup>[1]</sup> as well as acid **S1**,<sup>[2]</sup> were prepared as previously described. Commercial anhydrous Cu(hfac)<sub>2</sub>, and the corresponding hydrated form were used without any detriment to the reaction performance. All other chemicals were used as commercially available.

**Experimental equipment:** The photoinduced reactions were conducted in borosilicate glass test-tubes (9 and 10 mL capacity) fitted with GL14 and GL18 screw-caps placed in a test-tube rack on a magnetic stirplate that was flanked by two 400 nm 36W LED lights. The temperature in the test-tube rack was 35 °C. Eight parallel reactions arranged in two rows of four tubes were typically carried out in one test-tube rack.

Glovebox work was carried out in a nitrogen-filled LC Technology Solutions LCPW-220 glovebox.

**Purification:** Column chromatography was performed using CombiFlash Rf-200 (Teledyne-Isco) automated flash chromatography system, as well as manually. Thin layer chromatography was carried out on silica gel-coated glass plates (Merck Kieselgel 60 F254). Plates were visualized under ultraviolet light (254 nm) and using a potassium permanganate stain.

**Characterization:**  $^1\text{H}$ ,  $^{13}\text{C}$ ,  $^{11}\text{B}$ , and  $^{19}\text{F}$  NMR spectra were recorded at 500 MHz ( $^1\text{H}$ ), 125 MHz ( $^{13}\text{C}$ ), 202 MHz ( $^{31}\text{P}$ ), 470 MHz ( $^{19}\text{F}$ ), and 160 MHz ( $^{11}\text{B}$ ) on Bruker AVANCE III 500 instruments in  $\text{CDCl}_3$  or other specified deuterated solvents with and without tetramethylsilane (TMS) as an internal standard at 25 °C, unless specified otherwise. Chemical shifts ( $\delta$ ) are reported in parts per million (ppm) from tetramethylsilane ( $^1\text{H}$  and  $^{13}\text{C}$ ),  $\text{BF}_3\cdot\text{OEt}_2$  ( $^{11}\text{B}$ ), and  $\text{CFCl}_3$  ( $^{19}\text{F}$ ). Coupling constants ( $J$ ) are in Hz. Proton multiplicity is assigned using the following abbreviations: singlet (s), doublet (d), triplet (t), quartet (q), quintet (quint.), septet (sept.), multiplet (m), broad (br).

Infrared measurements were carried out neat on a Bruker Vector 22 FT-IR spectrometer fitted with a Specac diamond attenuated total reflectance (ATR) module.

UV/Vis spectra were recorded on a Cary 5000 UV/Vis/NIR spectrophotometer. EPR spectra were collected at room temperature on a Bruker EMX X-band EPR spectrometer.

## General Procedures

### General procedure using excess amount of acid (GP1, Method A and Schemes 2–5)

To a 10 mL test-tube equipped with a stirbar, aniline (0.3 mmol), carboxylic acid (0.6–1.5 mmol, 2–5 equiv.), acridine **A1** or **A2** (0.03 mmol, 10 mol%), Cu catalyst (anhydrous or hydrated Cu(hfac)<sub>2</sub> or Cu(acac)<sub>2</sub>) (0.03 mmol, 10 mol%), and oxidant (DTBP or DCP) (0.45–0.6 mmol, 1.5–2 equiv.) were added. An organic solvent (ethyl acetate or trifluorotoluene or chlorobenzene) (1.5–4.5 mL) was then added and the reaction mixture was degassed using a stream of argon bubbled through a glass pipet reaching the bottom of the test-tube, while vigorous stirring was maintained for 3 min. The test-tube was capped and the reaction mixture was irradiated with LED light ( $\lambda = 400$  nm) while stirring for 12–36 h. The reaction mixture was then diluted with ethyl acetate (10 mL), extracted with a saturated solution of EDTA (3 mL). The organic layer was collected, dried over anhydrous Na<sub>2</sub>SO<sub>4</sub>, concentrated under reduced pressure, and the remaining material was purified by flash chromatography on silica gel to give the amine product.

### General procedure using excess amount of aniline (GP2, Method B and Schemes 2–5)

To a 10 mL test-tube equipped with a stirbar, aniline (0.75 mmol, 2.5 equiv.), carboxylic acid (0.3 mmol), acridine **A1** or **A2** (0.03 mmol, 10 mol%), Cu catalyst (anhydrous or hydrated Cu(hfac)<sub>2</sub> or Cu(acac)<sub>2</sub>) (0.03 mmol, 10 mol%), and oxidant (DTBP or DCP) (0.45–0.6 mmol, 1.5–2 equiv.) were added. An organic solvent (ethyl acetate, trifluorotoluene or chlorobenzene) (1.5–4.5 mL) was then added and the reaction mixture was degassed using a stream of argon bubbled through a glass pipet reaching the bottom of the test-tube, while vigorous stirring was maintained for 3 min. The test-tube was capped and the reaction mixture was irradiated with LED light ( $\lambda = 400$  nm) while stirring for 12–36 h. The reaction mixture was then diluted with ethyl acetate (10 mL), extracted

with a saturated solution of EDTA (3 mL). The organic layer was collected, dried over anhydrous  $\text{Na}_2\text{SO}_4$ , concentrated under reduced pressure, and the remaining material was purified by flash chromatography on silica gel to give the amine product.

## Mechanistic studies

### Cyclic voltammetry measurements

Cyclic voltammetry was carried out on a BASi Epsilon potentiostat using a three-electrode cell with a glassy carbon working electrode, a 1M KCl Ag|AgCl reference electrode, and a platinum counter electrode at a  $50 \text{ mV}\cdot\text{s}^{-1}$  scan rate. with a degassed 50mM solution of *N*-methyl-*p*-anisidine or tetrabutylammonium cyclohexanecarboxylate in acetonitrile with tetrabutylammonium hexafluorophosphate (0.15M) as an electrolyte. The half-wave potential for the  $\text{Fc}^+|\text{Fc}$  redox couple was determined to be 0.39 V vs SCE. The reported oxidation potential ( $E_{\text{ox}} = 0.52 \text{ V}$  vs SCE in MeCN) is the inflection point potential, since inflection point potentials were shown to provide optimal estimates of half-wave potentials for quasireversible and irreversible redox systems.<sup>[3]</sup>

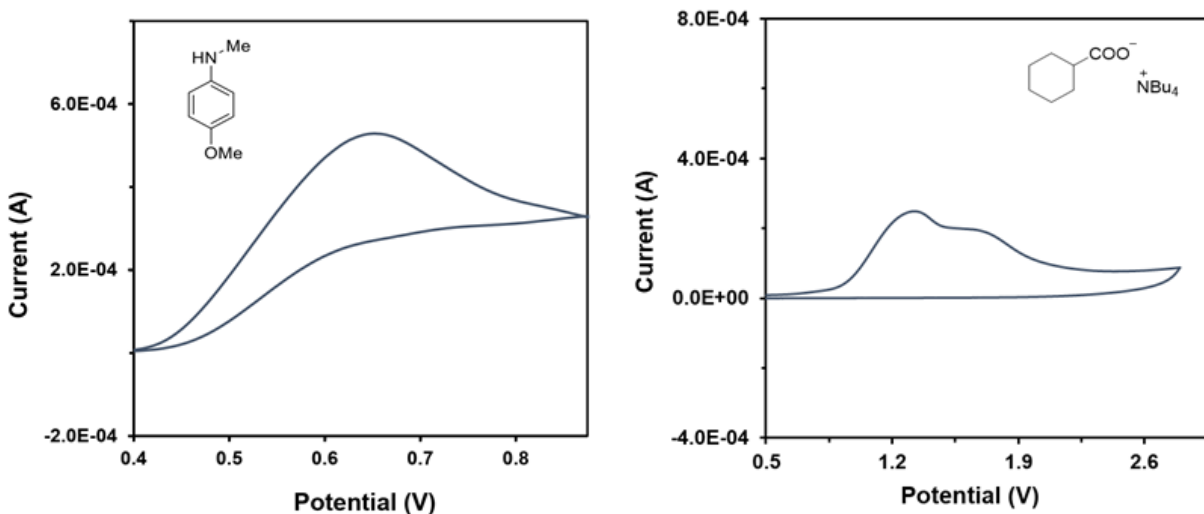

**Figure S1.** Cyclic voltammograms of *N*-methyl-*p*-anisidine and tetrabutylammonium cyclohexanecarboxylate.



### Job plot analysis of Cu(hfac)<sub>2</sub>-aniline binding stoichiometry

The binding stoichiometry of Cu(hfac)<sub>2</sub> and aniline was determined by a Job plot analysis constructed from the relative absorbance of the complex at 374 nm in UV-Vis spectra. Solutions with varied ratios of Cu(hfac)<sub>2</sub> and aniline were prepared in degassed ethyl acetate, and their total concentration was kept constant at 5mM. The relative absorbance of the mixture was calculated by subtracting the absorbances of Cu(hfac)<sub>2</sub> and aniline from those of the mixtures.<sup>[4]</sup> Maximum of  $\Delta A$  at  $\chi(\text{Cu(hfac)}_2) = 0.5$  indicates a 1 : 1 stoichiometry of the Cu(hfac)<sub>2</sub>-aniline complex in the solution. This conclusion is independently corroborated by the Job plot analysis of EPR data for the Cu(hfac)<sub>2</sub>-aniline system.

**Table S1.** Measured absorbance and relative absorbance values for the Job plot analysis.

| $\chi(\text{Cu(hfac)}_2)$ | A       | $\Delta A$ |
|---------------------------|---------|------------|
| 0                         | 0.00654 | 0          |
| 0.1                       | 0.28723 | 0.20296    |
| 0.2                       | 0.46188 | 0.29988    |
| 0.3                       | 0.63774 | 0.3980     |
| 0.4                       | 0.78975 | 0.47229    |
| 0.5                       | 0.93858 | 0.54339    |
| 0.6                       | 0.93359 | 0.46067    |
| 0.7                       | 0.88320 | 0.33255    |
| 0.8                       | 0.86047 | 0.23208    |
| 0.9                       | 0.80837 | 0.10226    |
| 1                         | 0.78384 | 0          |

### **Cu(hfac)<sub>2</sub>–Aniline association constant determination by nonlinear regression analysis**

The Cu(hfac)<sub>2</sub>–aniline association constant was determined by means of UV-Vis spectroscopy. 0.2mM Solutions of Cu(hfac)<sub>2</sub> with varied amounts of aniline (1, 3, 5, 10, 20, 30, 50, 70, 80, 100 equiv.) in degassed ethyl acetate were prepared. The difference UV-Vis absorption spectra were obtained by subtracting the absorbances of Cu(hfac)<sub>2</sub> and aniline from those of the mixtures. Changes in absorbance at 384 nm were used to determine the equilibrium constant according to a nonlinear modified Benesi–Hildebrand equilibrium model,<sup>[5]</sup> giving the association constant of 54 M<sup>-1</sup>.

**Table S2.** Relative absorbance values for the nonlinear regression analysis.

| <b>Equiv. of aniline</b> | <b>[aniline], M</b> | <b>ΔA</b> |
|--------------------------|---------------------|-----------|
| 1                        | 0.0002              | 0.00034   |
| 3                        | 0.0006              | 0.01846   |
| 5                        | 0.001               | 0.01508   |
| 10                       | 0.002               | 0.02482   |
| 20                       | 0.004               | 0.06438   |
| 30                       | 0.006               | 0.08701   |
| 50                       | 0.01                | 0.12438   |
| 70                       | 0.014               | 0.15181   |
| 80                       | 0.016               | 0.16593   |
| 100                      | 0.02                | 0.17975   |

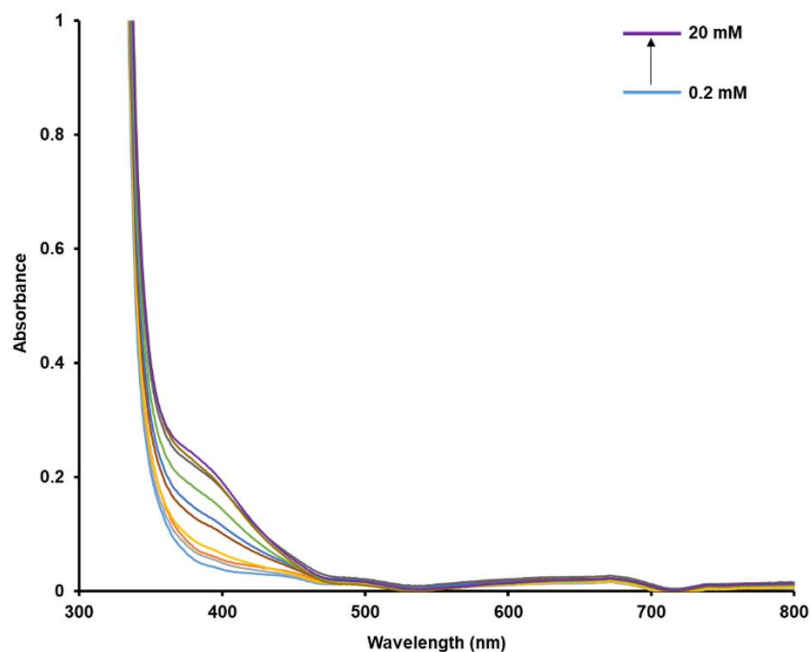

**Figure S2.** UV-Vis spectra of 0.2mM solutions of  $\text{Cu}(\text{hfac})_2$  in EtOAc in the presence of varied amounts of aniline (0.2–20mM).

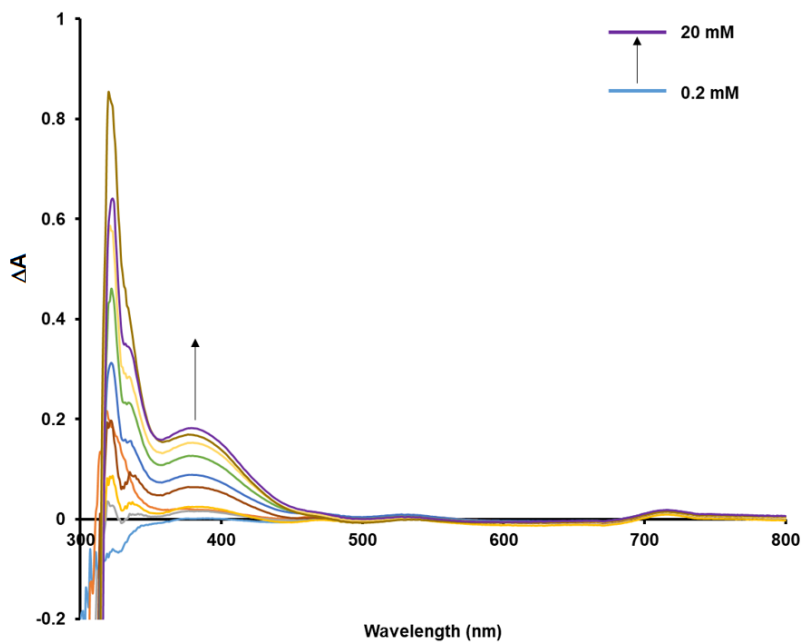

**Figure S3.** Difference UV-Vis spectra of 0.2mM solutions of  $\text{Cu}(\text{hfac})_2$  in EtOAc in the presence of varied amounts of aniline (0.2–20mM).

### EPR Investigation of Cu(hfac)<sub>2</sub>–aniline complexation

In order to independently corroborate the 1 : 1 stoichiometry of the Cu(hfac)<sub>2</sub>–aniline complex in solution, EPR spectra were collected in benzene solutions with varied molar fractions of Cu(hfac)<sub>2</sub> and a total concentration of Cu(hfac)<sub>2</sub> and aniline of 50mM (Figure S4). The Job plot was then constructed (Figure S5) as described for the UV-Vis study. With the  $\Delta A$  maximum at  $\chi(\text{Cu(hfac)}_2) = 0.5$ , the EPR studies confirmed the 1 : 1 stoichiometry of the Cu(hfac)<sub>2</sub>–aniline complex.

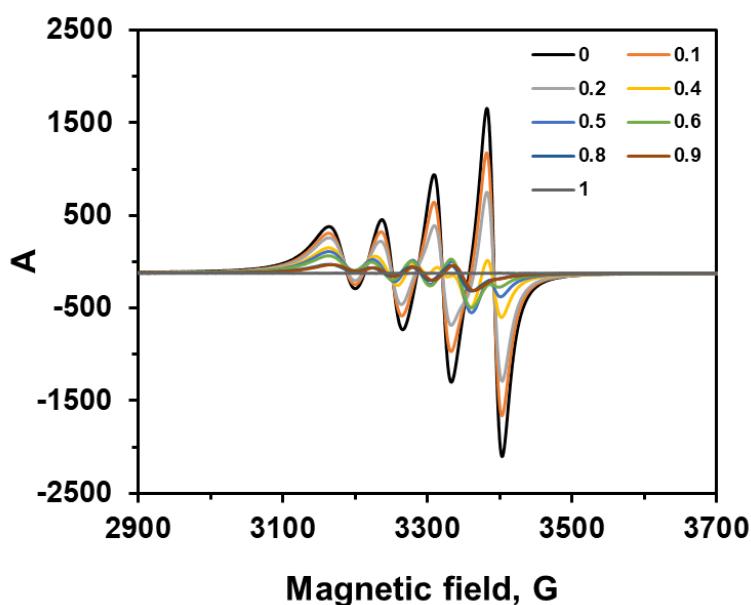

**Figure S4.** EPR spectra of Cu(hfac)<sub>2</sub> in the presence of aniline with combined total concentration of 10 mM in benzene at room temperature. The molar fractions of Cu(hfac)<sub>2</sub> are color-coded in the upper right quadrant of the plot.

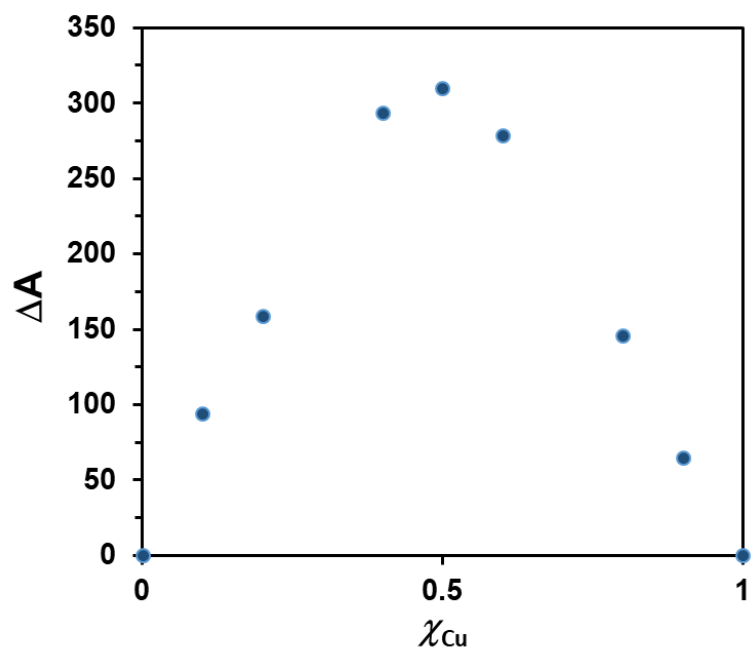

**Figure S5.** Job plot of the  $\text{Cu}(\text{hfac})_2$ -aniline system at 3265.94 G.

## Hammett plot analysis of the direct decarboxylative N-alkylation

Reactions were carried out as described in GP1 with 1,4-dimethoxybenzene as an internal standard and aliquots were taken and analyzed by means of  $^1\text{H}$  NMR spectroscopy at 30, 60, 120, 180, 240, and 300 min (Figure S6 and Table S3).

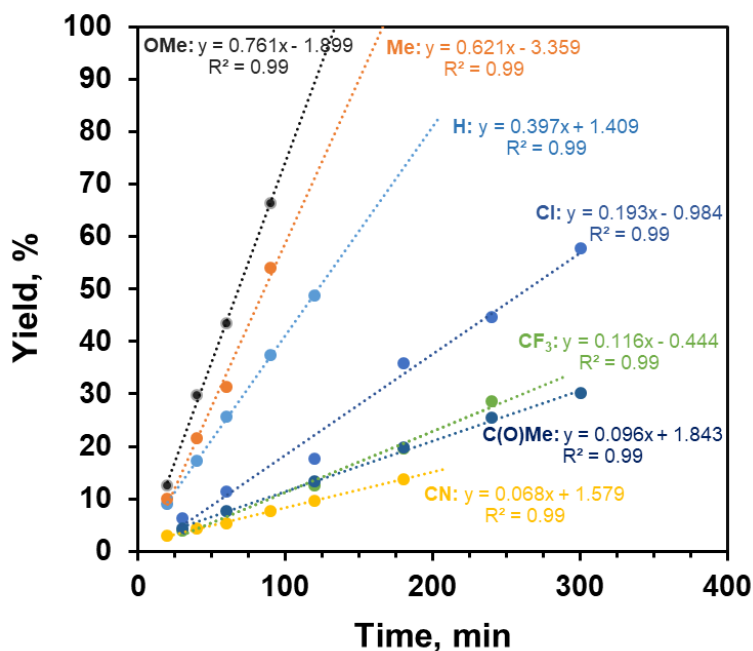

**Figure S6.** Time course plot of the DDA reaction of *para*-substituted anilines with cyclohexanecarboxylic acid.

**Table S3.** Experimental kinetic data for the Hammett plot analysis of the DDA reaction of *para*-substituted anilines with cyclohexanecarboxylic acid.

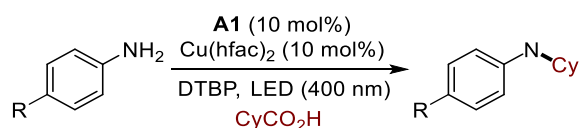

| Substituent     | $\sigma^{[6]}$ | $\log(k_R/k_H)$ |
|-----------------|----------------|-----------------|
| H               | 0              | 0               |
| Me              | -0.17          | 0.194           |
| OMe             | -0.27          | 0.282           |
| Cl              | 0.23           | -0.314          |
| CF <sub>3</sub> | 0.54           | -0.533          |
| C(O)Me          | 0.50           | -0.615          |
| CN              | 0.66           | -0.769          |

### Additional discussion of the DDA reaction mechanism

**Other photocatalysts:** Replacement of acridine photocatalysts **A1** and **A2** with other types of photocatalysts (Table S4), including organic photocatalysts (entries 1–3), as well as ruthenium and iridium photocatalysts (entries 4–9) in the presence and in the absence of DIPEA, did not lead to formation of product **3**. These results are in line with the prior detailed experimental and computational studies of the visible light-driven acridine photocatalysis that point to the importance of the directional character of the acridine–carboxylic acid interaction for a successful merger of the direct photocatalytic decarboxylation with other catalytic processes.<sup>[1]</sup>

**Table S4.** DDA reaction performance with other photocatalysts with and without added DIPEA.<sup>a</sup>

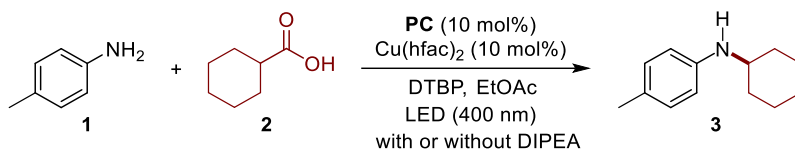

| Entry | Photocatalyst (PC)                                                                 | Yield, % <sup>b</sup> |
|-------|------------------------------------------------------------------------------------|-----------------------|
| 1     |                                                                                    | 0                     |
| 2     |                                                                                    | 0                     |
| 3     |                                                                                    | 0                     |
| 4     | [Ru(bpy) <sub>3</sub> ](BF <sub>4</sub> ) <sub>2</sub>                             | 0                     |
| 5     | [Ru( <i>p</i> -CF <sub>3</sub> -bpy) <sub>3</sub> ](BF <sub>4</sub> ) <sub>2</sub> | 0                     |
| 6     | [Ru(bpm) <sub>3</sub> ](BF <sub>4</sub> ) <sub>2</sub>                             | 0                     |
| 7     | Ir( <i>p</i> -CF <sub>3</sub> ppy) <sub>3</sub>                                    | 0                     |
| 8     | Ir(dFppy) <sub>3</sub>                                                             | 0                     |
| 9     | [Ir{dF(CF <sub>3</sub> )ppy} <sub>2</sub> (dtbpy)]PF <sub>6</sub>                  | 0                     |

<sup>a</sup> Reaction conditions: aniline **1** (0.3 mmol), carboxylic acid **2** (0.75 mmol), photocatalyst (10 mol%), Cu(hfac)<sub>2</sub> (10 mol%), DTBP (0.6 mmol), with or without DIPEA (2 equiv.), EtOAc (4.5 mL), LED (400 nm), 12 h. <sup>b</sup> Determined by <sup>1</sup>H NMR with 1,4-dimethoxybenzene as an internal standard.



**Influence of added base:** Additionally, the acridine-catalyzed DDA reaction was carried out in the presence of DIPEA and BTMG that were expected to inhibit the reaction, due to the interference with the acridine–carboxylic acid interaction (Table S5). Indeed, addition of the bases led to inhibition of the DDA reaction, further supporting the proposed mechanism.

**Table S5.** DDA reaction performance in the presence of added base.<sup>a</sup>

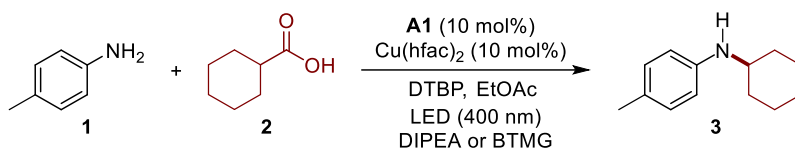

| Entry | Bases   | Yield, % <sup>b</sup> |
|-------|---------|-----------------------|
| 1     | No base | 99                    |
| 2     | DIPEA   | 15                    |
| 3     | BTMG    | 17                    |

<sup>a</sup> Reaction conditions: aniline **1** (0.3 mmol), carboxylic acid **2** (0.75 mmol), photocatalyst (10 mol%), Cu(hfac)<sub>2</sub> (10 mol%), DTBP (0.6 mmol), EtOAc (4.5 mL), LED (400 nm), base (0.3 mmol), 12 h. <sup>b</sup> Determined by <sup>1</sup>H NMR with 1,4-dimethoxybenzene as an internal standard. DIPEA = *N,N*-diisopropylethylamine, BTMG = 2-*tert*-Butyl-1,1,3,3-tetramethylguanidine.

**Cu(hfac)<sub>2</sub>–aniline complexation in the presence of acid and DTBP:** In order to confirm that Cu(hfac)<sub>2</sub>–aniline complex **B** is also formed in the presence of acetic acid and DTBP, the EPR spectra of Cu(hfac)<sub>2</sub> in the presence of the additives were recorded (Figure S7). The studies confirmed that complexation between Cu(hfac)<sub>2</sub> and aniline indeed took place and no additional new signals were observed.

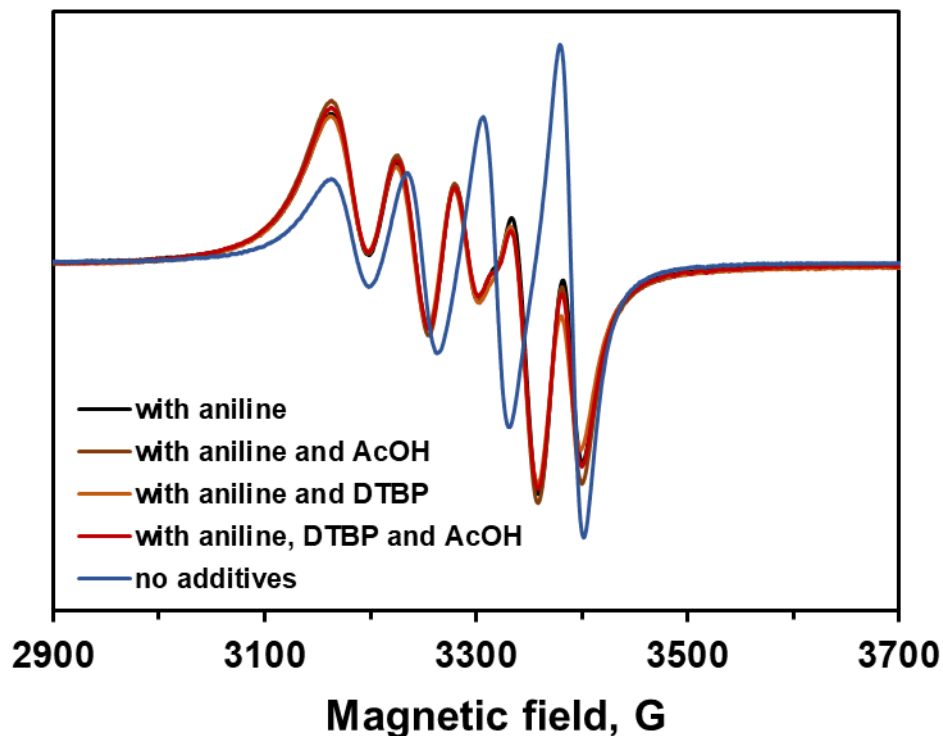

**Figure S7.** EPR spectra of  $\text{Cu}(\text{hfac})_2$  in the presence of aniline, acetic acid and TBHP (1 equiv.) in benzene at 10mM at room temperature.

**Radical trapping** with TEMPO was previously performed to ascertain alkyl radical production in acridine-photocatalyzed direct decarboxylation reactions.<sup>[1]</sup> In order to confirm that alkyl radical intermediates are produced and involved in the DDA reaction, it was carried out in the presence of TEMPO (Figure S8). Inhibition of the reaction was observed, and the corresponding radical trapping product **S2** was produced, supporting the radical pathway.

Additionally, the DDA reaction was carried out with cyclopropylacetic acid that produced the ring-opening product **S6**, as expected for the radical pathway. Similarly, the cyclized **S7** product was formed in addition to the uncyclized product **S8** with 6-heptenoic acid, supporting the radical mechanism.

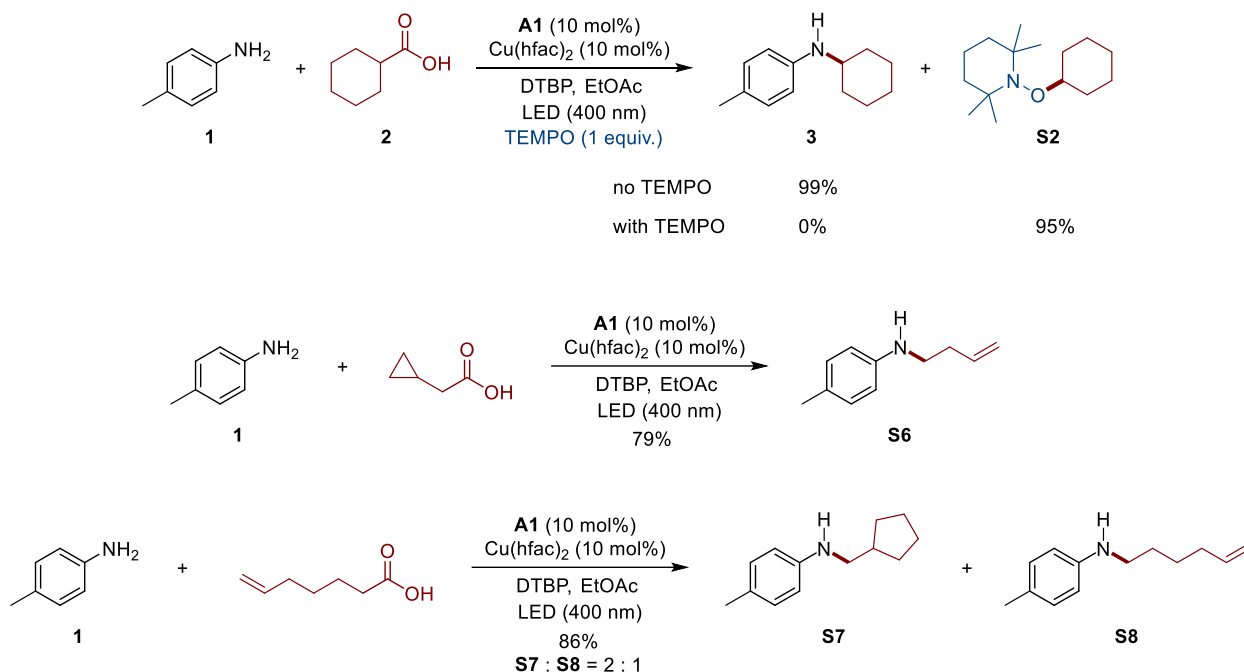

**Figure S8.** Radical trapping experiments with TEMPO as well as radical ring-opening and ring-closing experiments with cyclopropylacetic acid and 6-heptenoic acid.

**Evaluation of involvement of alkyl carbocations:** Rearrangement products due to 1,2-hydride shifts were not observed for carboxylic acids that would be expected to produce rearrangement products, if the DDA reaction involved a carbocation intermediate (Figure S9). 1,2-Hydride shifts occur with rates that exceed the diffusion limit ( $k_{1,2-H} > 2 \cdot 10^{10} \text{ s}^{-1}$ ),<sup>[7]</sup> and the absence of the rearrangement products indicates that the DDA reaction does not involve alkyl carbocation intermediates.<sup>[8]</sup>

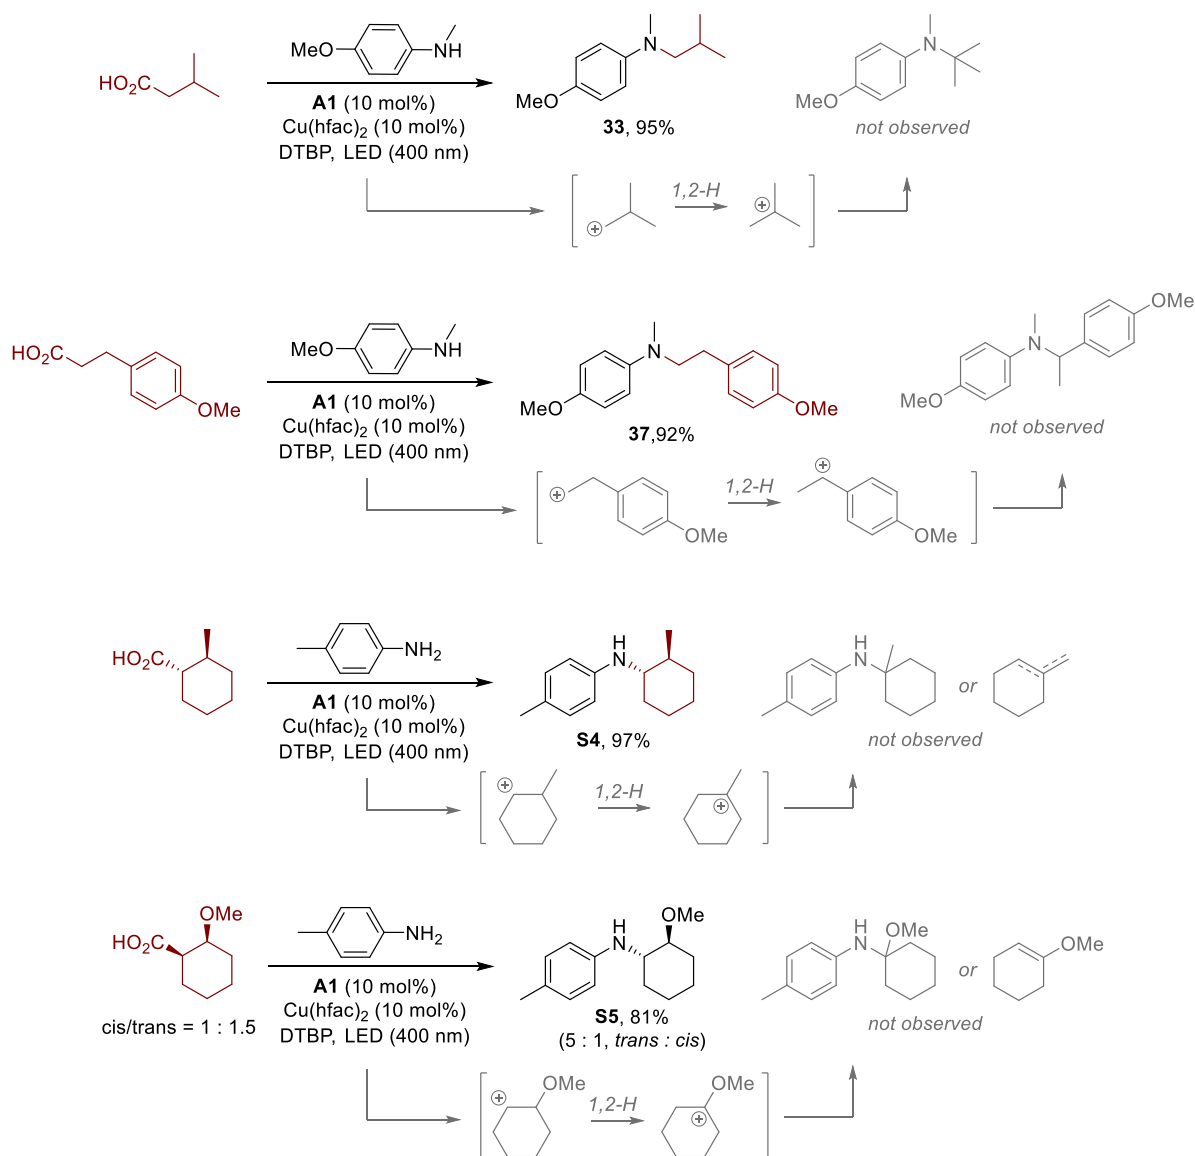

**Figure S9.** Evaluation of involvement of alkyl carbocations in the DDA reaction.

**Evaluation of the direct reductive elimination and the base-assisted process:** The mechanisms of C–N bond-forming Cu<sup>III</sup>–N reductive elimination processes remain poorly understood. Additional calculations were carried out in order to compare the direct unimolecular reductive elimination ( $C \rightarrow D + E$ , Figure 2) with the net bimolecular base-mediated pathways with aniline and acridine catalyst **A1** as bases (Figure S10). The deprotonation of intermediate **C** was highly thermodynamically unfavorable in both

cases. The thermodynamically unfavorable deprotonation resulted in the total barrier of 30.4 kcal/mol for aniline, making the pathway highly kinetically unfavorable. The total barrier was 19.6 kcal/mol for acridine **A1**. Since the base-mediated pathways are net bimolecular and dependent on the concentration of the base in the solution, the base concentration has to be factored in to compare the relative rates of the unimolecular direct reductive elimination and the bimolecular base-mediated elimination process ( $v_u/v_b = k_u/k_b c_{A1} = e^{-\Delta\Delta G^\ddagger/RT}/c_{A1}$ ; where  $v_u$ ,  $k_u$  and  $v_b$ ,  $k_b$  are the rates and rate constants of the direct unimolecular and the base-mediated bimolecular reductive eliminations,  $c_{A1}$  is the concentration of acridine **A1**).

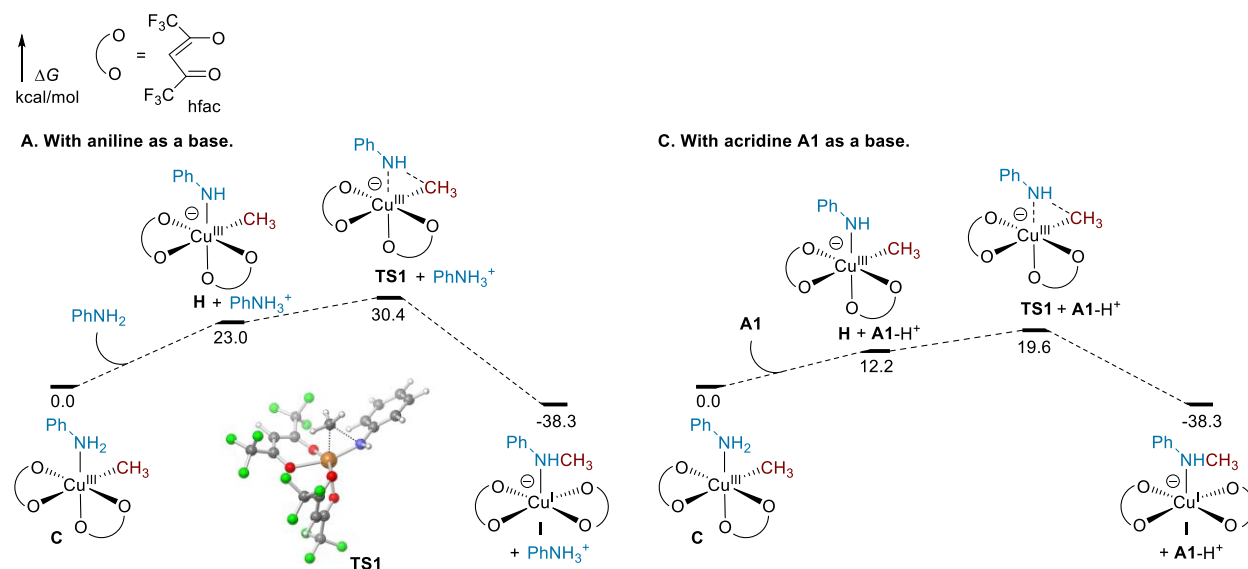

**Figure S10.** Computational studies of the base-mediated reductive elimination pathways with aniline and acridine **A1** as bases.

Given that  $c_{A1}$  cannot exceed the initial **A1** concentration of 0.02M, the calculations indicate that the unimolecular direct reductive elimination is >7.8 times faster than the acridine **A1**-mediated reductive elimination process. This result is in line with the moderately negative Hammett reaction constant  $\rho = -1.1$  observed for the DDA reaction,

and with prior computational studies that demonstrated that base-mediated reductive elimination processes become highly disfavored with weak organic bases.<sup>[9]</sup>

Additionally, further computational studies showed that deprotonation of complex **B** ( $\text{Cu}^{\text{II}}(\text{PhNH}_2)(\text{hfac})_2$ ) is highly thermodynamically disfavored by 31.4 and 20.5 kcal/mol with aniline and acridine **A1**, indicating that intermediate **J** is not present in sufficient concentrations to compete with complex **B** in the cross-termination with the alkyl radical.

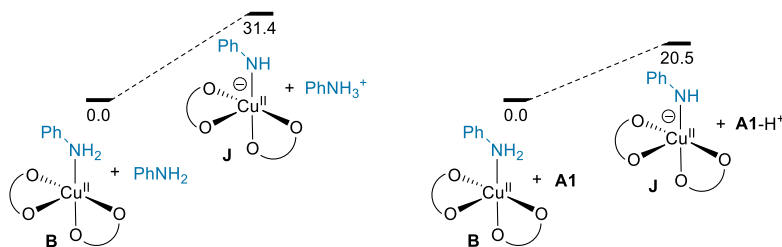

**Figure S11.** Computational studies of the deprotonation of complex **B** with aniline and acridine **A1**.

These computational results suggest that the direct C–N bond-forming reductive elimination from the  $\text{Cu}^{\text{III}}$  center is operative under the condition of the DDA reaction. Although C–N bond-forming reductive elimination processes from high-valent  $\text{Cu}^{\text{III}}$  complexes remain poorly understood from the experimental and theoretical perspectives, analogous direct C–N and C–P bond-forming reductive eliminations are known to readily take place from isoelectronic  $\text{Au}^{\text{III}}$  complexes.<sup>[10]</sup>

## Amine products

### *N*-Cyclohexyl-4-methylaniline (**3**)<sup>[11]</sup>

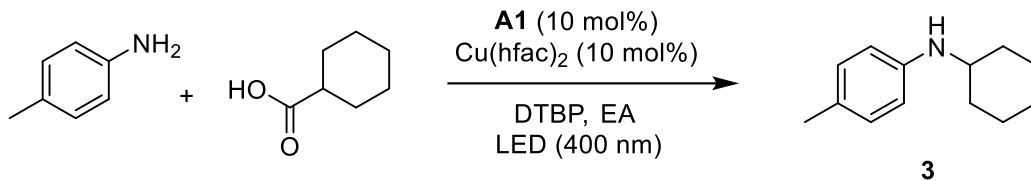

According to **GP1**, the reaction was carried out with *p*-toluidine (32 mg, 0.3 mmol), cyclohexanecarboxylic acid (96 mg, 0.75 mmol, 2.5 equiv.), acridine **A1** (9 mg, 0.03 mmol, 10 mol%), Cu(hfac)<sub>2</sub> (14 mg, 0.03 mmol, 10 mol%), and DTBP (88 mg, 0.6 mmol, 2 equiv.) in ethyl acetate (3 mL). The reaction mixture was degassed using a stream of argon bubbled through a glass pipet reaching the bottom of the test-tube, while vigorous stirring was maintained for 3 min. The test-tube was capped and the reaction mixture was irradiated with LED light ( $\lambda = 400$  nm) while stirring at 35 °C for 12 h. The reaction mixture was then diluted with ethyl acetate (10 mL), extracted with a saturated solution of EDTA (3 mL). The organic layer was collected, dried over anhydrous Na<sub>2</sub>SO<sub>4</sub>, concentrated under reduced pressure, and the remaining material was purified by flash chromatography on silica gel (hexane/ ethyl acetate 95 : 5 v/v) to give the amine product **3** (55 mg, 97%) as a brown solid.

**Gram scale for compound 3:** According to **GP1**, the reaction was carried out with *p*-toluidine (1.28 g, 12 mmol), cyclohexanecarboxylic acid (3.84 g, 30 mmol, 2.5 equiv.), acridine **A1** (176 mg, 0.6 mmol, 5 mol%), Cu(hfac)<sub>2</sub> (280 mg, 0.6 mmol, 5 mol%), and DTBP (3.52 g, 24 mmol, 2 equiv.) in ethyl acetate (80 mL). The reaction mixture was degassed using a stream of argon bubbled through a glass pipet reaching the bottom of the test-tube, while vigorous stirring was maintained for 5 min. The test-tube was capped and the reaction mixture was irradiated with LED light ( $\lambda = 400$  nm) while stirring for 36 h. The reaction mixture was then diluted with ethyl acetate (50 mL), extracted with a saturated

solution of EDTA (30 mL). The organic layer was collected, dried over anhydrous Na<sub>2</sub>SO<sub>4</sub>, concentrated under reduced pressure, and the remaining material was purified by flash chromatography on silica gel (hexane/ ethyl acetate 95 : 5 v/v) to give the amine product **3** (2.12 g, 94%) as a brown solid.

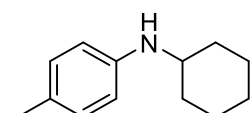 m.p.: 38–40 °C. – <sup>1</sup>H NMR (500 MHz, CDCl<sub>3</sub>): 6.97 (2 H, d, *J* = 8.1 Hz), 6.53 (2 H, d, *J* = 8.4 Hz), 3.22 (1 H, tt, *J* = 10.1, 3.6 Hz), 2.23 (3 H, s), 2.10–1.99 (2 H, m), 1.76 (2 H, dt, *J* = 13.2, 3.7 Hz), 1.65 (1 H, dt, *J* = 12.4, 3.5 Hz), 1.46–1.31 (2 H, m), 1.23 (1 H, ddd, *J* = 15.6, 9.7, 3.3 Hz), 1.18–1.08 (2 H, m) ppm. – <sup>13</sup>C NMR (125 MHz, CDCl<sub>3</sub>): 145.2, 129.9, 126.3, 113.7, 52.2, 33.7, 26.1, 25.2, 20.5 ppm. – IR: 3393, 3074, 3019, 2923, 2850, 1617, 1516, 1481, 1448, 1317, 1300, 1146, 1125, 1101, 805 cm<sup>-1</sup>.

### 3-Methoxy-*N*-(4-phenylbutyl)aniline (**4**)

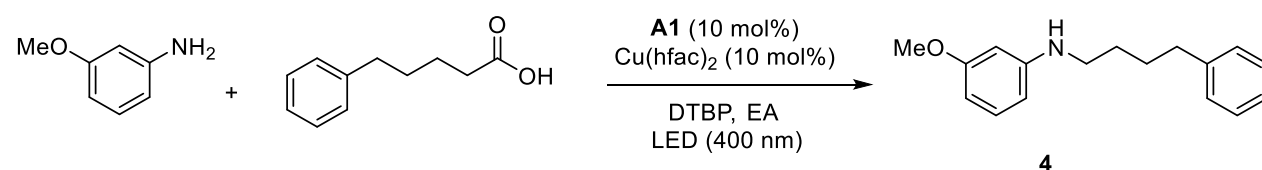

According to **GP1**, the reaction was carried out with *m*-anisidine (37 mg, 0.3 mmol), 5-phenylpentanoic acid (133 mg, 0.75 mmol, 2.5 equiv.), acridine **A1** (9 mg, 0.03 mmol, 10 mol%), Cu(hfac)<sub>2</sub> (14 mg, 0.03 mmol, 10 mol%), and DTBP (88 mg, 0.6 mmol, 2 equiv.) in ethyl acetate (4.5 mL). The reaction mixture was degassed using a stream of argon bubbled through a glass pipet reaching the bottom of the test-tube, while vigorous stirring was maintained for 3 min. The test-tube was capped and the reaction mixture was irradiated with LED light ( $\lambda = 400$  nm) while stirring for 12 h. The reaction mixture was then diluted with ethyl acetate (10 mL), extracted with a saturated solution of EDTA (3 mL). The organic layer was collected, dried over anhydrous Na<sub>2</sub>SO<sub>4</sub>, concentrated under reduced pressure, and the remaining material was purified by flash chromatography on silica gel (hexane/ ethyl acetate 9 : 1 v/v) to give the amine product **4** (69 mg, 89%) as a colorless liquid.



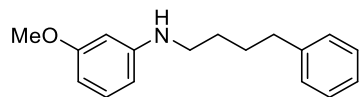

$^1\text{H}$  NMR (500 MHz,  $\text{CDCl}_3$ ): 7.33 (2 H, t,  $J = 6.9$  Hz), 7.28–7.19 (3 H, m), 7.12 (1 H, t,  $J = 8.1$  Hz), 6.31 (1 H, d,  $J = 8.5$  Hz), 6.25 (1 H, d,  $J = 8.0$  Hz), 6.19 (1 H, s), 3.81 (3 H, d,  $J = 1.8$  Hz), 3.64 (1 H, s), 3.15 (2 H, t,  $J = 6.9$  Hz), 2.70 (2 H, t,  $J = 7.5$  Hz), 1.78 (2 H, quint.,  $J = 7.4$  Hz), 1.69 (2 H, quint.,  $J = 7.0$  Hz) ppm. –  $^{13}\text{C}$  NMR (125 MHz,  $\text{CDCl}_3$ ): 161.0, 149.9, 142.3, 130.0, 128.5, 128.4, 125.9, 106.0, 102.3, 98.7, 55.2, 43.9, 35.8, 29.2, 29.0 ppm. – IR: 3400, 3092, 3024, 2930, 2855, 2844, 1614. 1509, 1452, 1341, 1301, 1210, 1161, 1120, 1046, 699  $\text{cm}^{-1}$ . – HRMS: calcd for  $\text{C}_{17}\text{H}_{22}\text{NO}$ : 256.1696, found 256.1696  $[\text{M}+\text{H}^+]$ .

#### 4-Methoxy-*N*-nonylaniline (**5**)

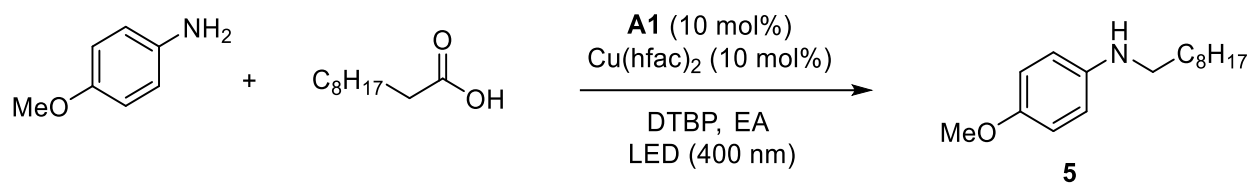

According to **GP1**, the reaction was carried out with *p*-anisidine (37 mg, 0.3 mmol), decanoic acid (129 mg, 0.75 mmol, 2.5 equiv.), acridine **A1** (9 mg, 0.03 mmol, 10 mol%),  $\text{Cu}(\text{hfac})_2$  (14 mg, 0.03 mmol, 10 mol%), and DTBP (88 mg, 0.6 mmol, 2 equiv.) in ethyl acetate (4.5 mL). The reaction mixture was degassed using a stream of argon bubbled through a glass pipet reaching the bottom of the test-tube, while vigorous stirring was maintained for 3 min. The test-tube was capped and the reaction mixture was irradiated with LED light ( $\lambda = 400$  nm) while stirring for 12 h. The reaction mixture was then diluted with ethyl acetate (10 mL), extracted with a saturated solution of EDTA (3 mL). The organic layer was collected, dried over anhydrous  $\text{Na}_2\text{SO}_4$ , concentrated under reduced pressure, and the remaining material was purified by flash chromatography on silica gel (hexane/ ethyl acetate 9 : 1 v/v) to give the amine product **5** (55 mg, 74%) as a dark yellow liquid.

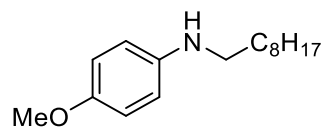

$^1\text{H}$  NMR (500 MHz,  $\text{CDCl}_3$ ): 6.79 (2 H, d,  $J = 8.8$  Hz), 6.59 (2 H, d,  $J = 8.9$  Hz), 3.76 (3 H, s), 3.07 (2 H, t,  $J = 7.2$  Hz), 1.61 (2 H, quint.,  $J = 7.2$  Hz), 1.48–1.19 (12 H, m), 0.91 (3 H, t,  $J = 6.8$  Hz) ppm. –  $^{13}\text{C}$  NMR (125 MHz,  $\text{CDCl}_3$ ): 152.0, 143.0, 115.0, 114.1, 55.9, 45.1, 32.0, 29.8, 29.7, 29.6, 29.4, 27.3, 22.8, 14.2 ppm. – IR: 3387, 3056, 2959, 2922, 2852, 2834, 1619, 1512, 1464, 1437, 1377, 1234, 1179, 1110, 1039, 817, 767  $\text{cm}^{-1}$ . – HRMS: calcd for  $\text{C}_{16}\text{H}_{28}\text{NO}$ : 250.2165, found 250.2168 [ $\text{M}+\text{H}^+$ ].

### ***N*-(5-Chloropentyl)-3-methoxyaniline (6)**

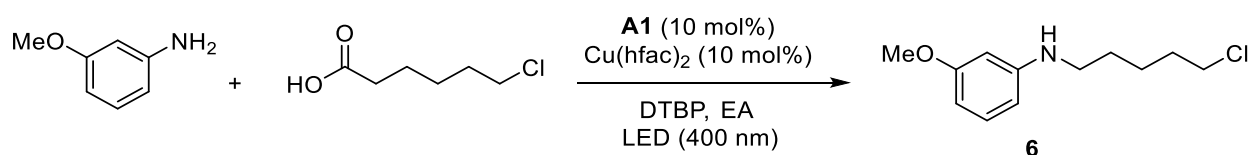

According to **GP1**, the reaction was carried out with *m*-anisidine (37 mg, 0.3 mmol), 6-chlorohexanoic acid (112 mg, 0.75 mmol, 2.5 equiv.), acridine **A1** (9 mg, 0.03 mmol, 10 mol%),  $\text{Cu}(\text{hfac})_2$  (14 mg, 0.03 mmol, 10 mol%), and DTBP (88 mg, 0.6 mmol, 2 equiv.) in ethyl acetate (3 mL). The reaction mixture was degassed using a stream of argon bubbled through a glass pipet reaching the bottom of the test-tube, while vigorous stirring was maintained for 3 min. The test-tube was capped and the reaction mixture was irradiated with LED light ( $\lambda = 400$  nm) while stirring for 12 h. The reaction mixture was then diluted with ethyl acetate (10 mL), extracted with a saturated solution of EDTA (3 mL). The organic layer was collected, dried over anhydrous  $\text{Na}_2\text{SO}_4$ , concentrated under reduced pressure, and the remaining material was purified by flash chromatography on silica gel (hexane/ ethyl acetate 9 : 1 v/v) to give the amine product **6** (36 mg, 53%) as a colorless liquid.

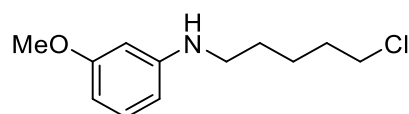

$^1\text{H}$  NMR (500 MHz,  $\text{CDCl}_3$ ): 7.08 (1 H, t,  $J = 8.1$  Hz), 6.28 (1 H, dd,  $J = 8.2, 2.4$  Hz), 6.23 (1 H, dd,  $J = 8.0, 2.2$  Hz), 6.16 (1 H, d,  $J = 2.4$  Hz), 3.78 (3 H, s), 3.68 (1 H, brs), 3.56 (2 H, t,  $J = 6.6$  Hz), 3.12 (2 H, t,  $J = 7.0$

Hz), 1.83 (2 H, quint.,  $J = 6.9$  Hz), 1.65 (2 H, quint.,  $J = 7.1$  Hz), 1.56 (2 H, q,  $J = 8.1$  Hz) ppm. –  $^{13}\text{C}$  NMR (125 MHz,  $\text{CDCl}_3$ ): 161.0, 149.8, 130.1, 106.0, 102.4, 98.8, 55.2, 45.0, 43.8, 32.4, 28.9, 24.6 ppm. – IR: 3303, 3066, 2998, 2934, 2859, 2838, 1614, 1601, 1497, 1453, 1342, 1268, 1210, 1161, 1057, 997, 770, 694  $\text{cm}^{-1}$ . – HRMS: calcd for  $\text{C}_{12}\text{H}_{19}\text{ClNO}$ : 228.1150, found 228.1150  $[\text{M}+\text{H}^+]$ .

### *tert*-Butyl 4-(pentylamino)benzoate (7)

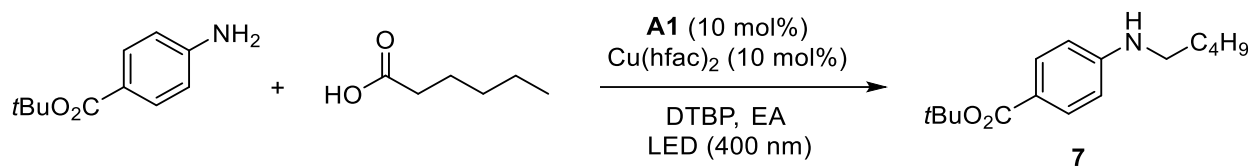

According to **GP1**, the reaction was carried out with *tert*-butyl 4-aminobenzoate (58 mg, 0.3 mmol), hexanoic acid (87 mg, 0.75 mmol, 2.5 equiv.), acridine **A1** (9 mg, 0.03 mmol, 10 mol%),  $\text{Cu}(\text{hfac})_2$  (14 mg, 0.03 mmol, 10 mol%), and DTBP (88 mg, 0.6 mmol, 2 equiv.) in ethyl acetate (4.5 mL). The reaction mixture was degassed using a stream of argon bubbled through a glass pipet reaching the bottom of the test-tube, while vigorous stirring was maintained for 3 min. The test-tube was capped and the reaction mixture was irradiated with LED light ( $\lambda = 400$  nm) while stirring for 12 h. The reaction mixture was then diluted with ethyl acetate (10 mL), extracted with a saturated solution of EDTA (3 mL). The organic layer was collected, dried over anhydrous  $\text{Na}_2\text{SO}_4$ , concentrated under reduced pressure, and the remaining material was purified by flash chromatography on silica gel (hexane/ ethyl acetate 95 : 5 v/v) to give the amine product **7** (64 mg, 81%) as a colorless liquid.

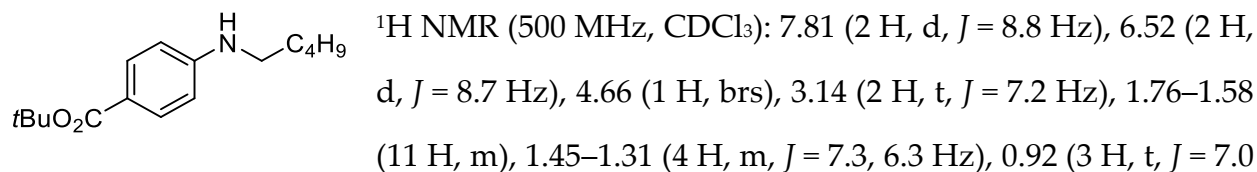

–  $^{13}\text{C}$  NMR (125 MHz,  $\text{CDCl}_3$ ): 166.3, 151.9, 131.4, 120.0, 111.3, 79.8, 43.5, 29.3, 29.1, 28.4, 22.6, 14.1 ppm. – IR: 3376, 3000, 2956, 2928, 2859, 1711, 1681, 1602, 1526, 1475,

1366, 1309, 1290, 1157, 1106, 868, 835, 771, 700  $\text{cm}^{-1}$ . – HRMS: calcd for  $\text{C}_{16}\text{H}_{26}\text{NO}_2$ : 264.1958, found 264.1960  $[\text{M}+\text{H}^+]$ .

***tert*-Butyl 4-(pentylamino)benzoate (8)<sup>[12]</sup>**

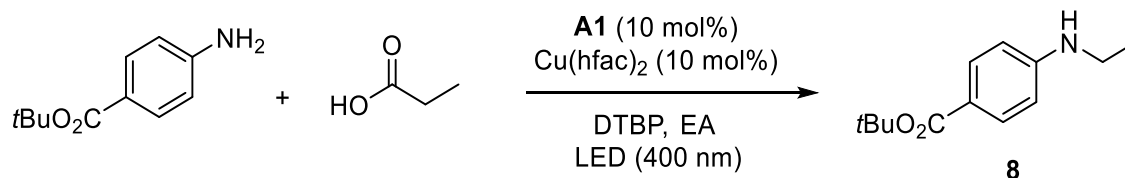

According to **GP1**, the reaction was carried out with *tert*-butyl 4-aminobenzoate (58 mg, 0.3 mmol), propanoic acid (56 mg, 0.75 mmol, 2.5 equiv.), acridine **A1** (9 mg, 0.03 mmol, 10 mol%),  $\text{Cu}(\text{hfac})_2$  (14 mg, 0.03 mmol, 10 mol%), and DTBP (88 mg, 0.6 mmol, 2 equiv.) in ethyl acetate (4.5 mL). The reaction mixture was degassed using a stream of argon bubbled through a glass pipet reaching the bottom of the test-tube, while vigorous stirring was maintained for 3 min. The test-tube was capped and the reaction mixture was irradiated with LED light ( $\lambda = 400 \text{ nm}$ ) while stirring for 12 h. The reaction mixture was then diluted with ethyl acetate (10 mL), extracted with a saturated solution of EDTA (3 mL). The organic layer was collected, dried over anhydrous  $\text{Na}_2\text{SO}_4$ , concentrated under reduced pressure, and the remaining material was purified by flash chromatography on silica gel (hexane/ ethyl acetate 9 : 1 v/v) to give the amine product **8** (46 mg, 69%) as a colorless liquid.

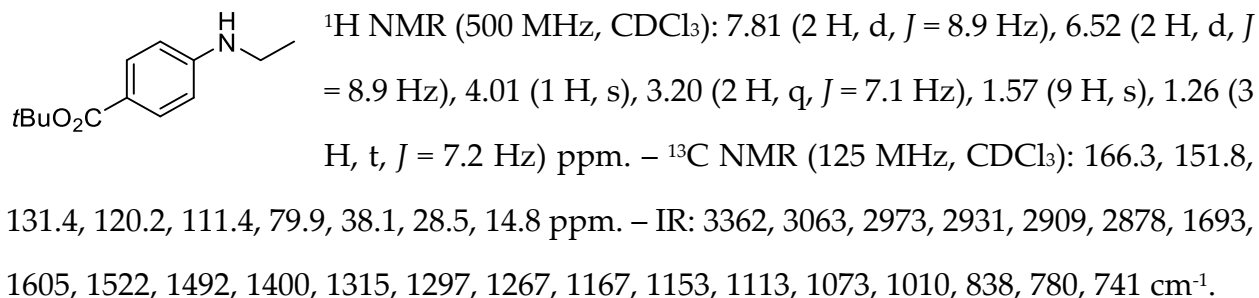

### N-Pentadecyl-4-(trifluoromethyl)aniline (9)

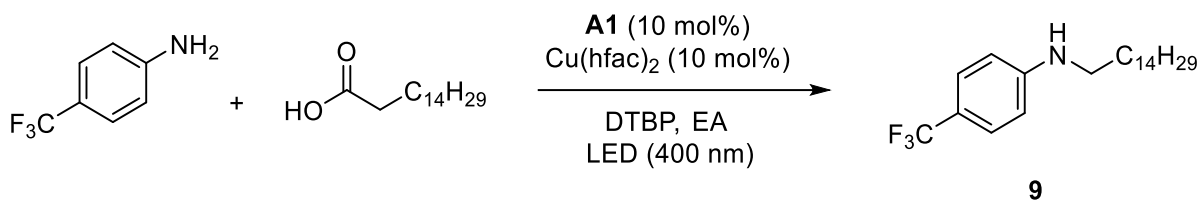

According to **GP1**, the reaction was carried out with 4-(trifluoromethyl)aniline (48 mg, 0.3 mmol), palmitic acid (192 mg, 0.75 mmol, 2.5 equiv.), acridine **A1** (9 mg, 0.03 mmol, 10 mol%),  $\text{Cu}(\text{hfac})_2$  (14 mg, 0.03 mmol, 10 mol%), and DTBP (88 mg, 0.6 mmol, 2 equiv.) in ethyl acetate (3 mL). The reaction mixture was degassed using a stream of argon bubbled through a glass pipet reaching the bottom of the test-tube, while vigorous stirring was maintained for 3 min. The test-tube was capped and the reaction mixture was irradiated with LED light ( $\lambda = 400$  nm) while stirring for 12 h. The reaction mixture was then diluted with ethyl acetate (10 mL), extracted with a saturated solution of EDTA (3 mL). The organic layer was collected, dried over anhydrous  $\text{Na}_2\text{SO}_4$ , concentrated under reduced pressure, and the remaining material was purified by flash chromatography on silica gel (hexane/ ethyl acetate 95 : 5 v/v) to give the amine product **9** (99 mg, 89%) as a brown solid

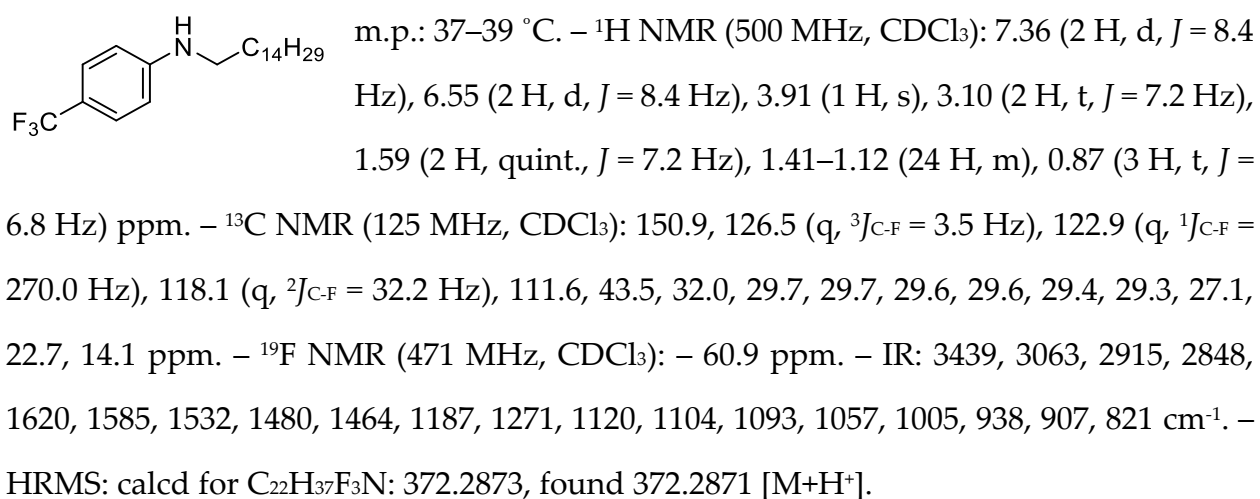

### N-Methyl-4-(trifluoromethyl)aniline (**10**)<sup>[13]</sup>

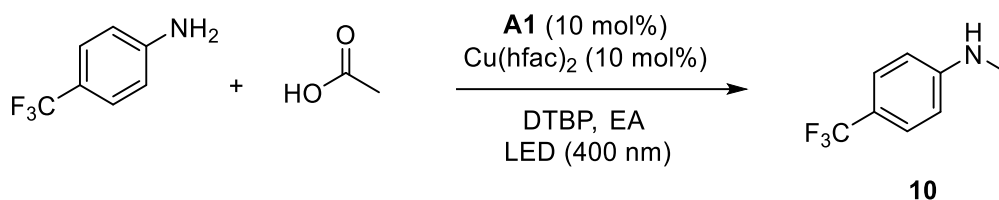

According to **GP1**, the reaction was carried out with 4-(trifluoromethyl)aniline (48 mg, 0.3 mmol), acetic acid (90 mg, 1.5 mmol, 5 equiv.), acridine **A1** (9 mg, 0.03 mmol, 10 mol%), Cu(hfac)<sub>2</sub> (14 mg, 0.03 mmol, 10 mol%), and DTBP (88 mg, 0.6 mmol, 2 equiv.) in ethyl acetate (3 mL). The reaction mixture was degassed using a stream of argon bubbled through a glass pipet reaching the bottom of the test-tube, while vigorous stirring was maintained for 3 min. The test-tube was capped and the reaction mixture was irradiated with LED light ( $\lambda = 400$  nm) while stirring for 12 h. The reaction mixture was then diluted with ethyl acetate (10 mL), extracted with a saturated solution of EDTA (3 mL). The organic layer was collected, dried over anhydrous Na<sub>2</sub>SO<sub>4</sub>, concentrated under reduced pressure, and the remaining material was purified by flash chromatography on silica gel (hexane/ ethyl acetate 95 : 5 v/v) to give the amine product **10** (28 mg, 53%) as a colorless liquid.

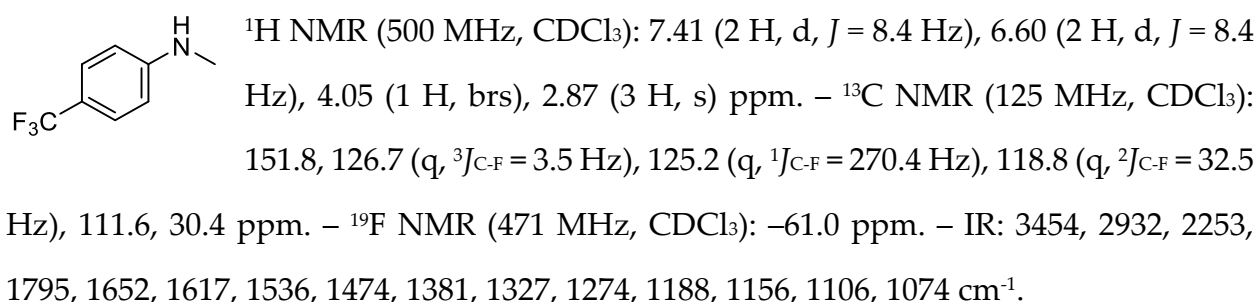

### 3-(Methylsulfonyl)-*N*-pentylaniline (**11**)

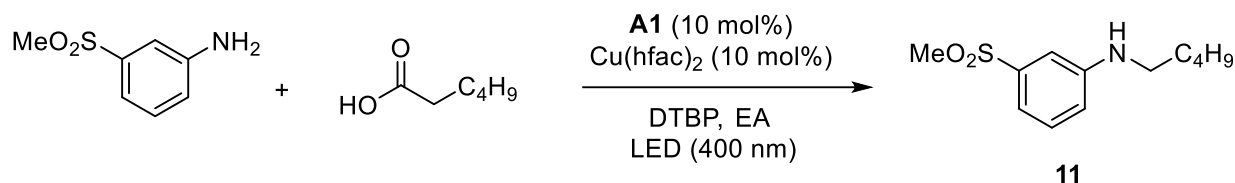

According to **GP1**, the reaction was carried out with 3-(methylsulfonyl)aniline (51 mg, 0.3 mmol), hexanoic acid (87 mg, 0.75 mmol, 2.5 equiv.), acridine **A1** (9 mg, 0.03 mmol, 10 mol%), Cu(hfac)<sub>2</sub> (14 mg, 0.03 mmol, 10 mol%), and DTBP (88 mg, 0.6 mmol, 2 equiv.) in ethyl acetate (3 mL). The reaction mixture was degassed using a stream of argon bubbled through a glass pipet reaching the bottom of the test-tube, while vigorous stirring was maintained for 3 min. The test-tube was capped and the reaction mixture was irradiated with LED light ( $\lambda = 400$  nm) while stirring for 12 h. The reaction mixture was then diluted with ethyl acetate (10 mL), extracted with a saturated solution of EDTA (3 mL). The organic layer was collected, dried over anhydrous Na<sub>2</sub>SO<sub>4</sub>, concentrated under reduced pressure, and the remaining material was purified by flash chromatography on silica gel (hexane/ ethyl acetate 4 : 1 v/v) to give the amine product **11** (63 mg, 87%) as a colorless liquid.

<sup>1</sup>H NMR (500 MHz, CDCl<sub>3</sub>): 7.30 (1 H, t,  $J = 8.0$  Hz), 7.17 (1 H, dt,  $J = 7.8, 1.3$  Hz), 7.09 (1 H, t,  $J = 2.1$  Hz), 6.80 (1 H, ddd,  $J = 8.2, 2.5, 0.9$  Hz), 3.13 (2 H, t,  $J = 7.2$  Hz), 3.03 (3 H, s), 1.72–1.57 (2 H, m), 1.48–1.31 (4 H, m), 1.07–0.80 (3 H, m,) ppm. – <sup>13</sup>C NMR (125 MHz, CDCl<sub>3</sub>): 149.2, 141.3, 130.1, 117.4, 114.9, 110.0, 44.5, 43.7, 29.3, 28.9, 22.5, 14.1 ppm. – IR: 3390, 3054, 2955, 2927, 2858, 2255, 1736, 1600, 1513, 1473, 1424, 1377, 1155, 1081, 986, 908, 856 cm<sup>-1</sup>. – HRMS: calcd for C<sub>12</sub>H<sub>20</sub>NO<sub>2</sub>S: 242.1209, found 242.1207 [M+H<sup>+</sup>].

### *N*-Isobutyl-3-(4,4,5,5-tetramethyl-1,3,2-dioxaborolan-2-yl)aniline (**12**)

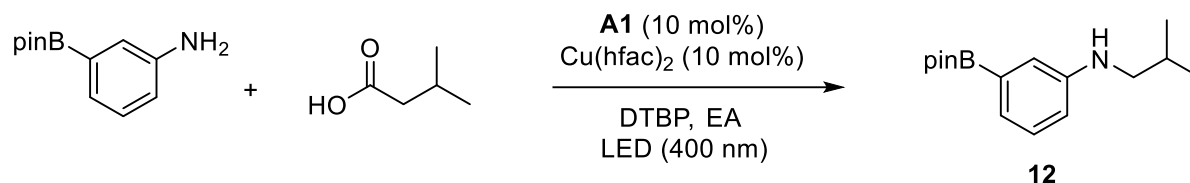

According to **GP1**, the reaction was carried out with 3-(4,4,5,5-tetramethyl-1,3,2-dioxaborolan-2-yl)aniline (66 mg, 0.3 mmol), isovaleric acid (77 mg, 0.75 mmol, 2.5 equiv.), acridine **A1** (9 mg, 0.03 mmol, 10 mol%), Cu(hfac)<sub>2</sub> (14 mg, 0.03 mmol, 10 mol%), and DTBP (88 mg, 0.6 mmol, 2 equiv.) in ethyl acetate (4.5 mL). The reaction mixture was degassed using a stream of argon bubbled through a glass pipet reaching the bottom of the test-tube, while vigorous stirring was maintained for 3 min. The test-tube was capped and the reaction mixture was irradiated with LED light ( $\lambda = 400$  nm) while stirring for 12 h. The reaction mixture was then diluted with ethyl acetate (10 mL), extracted with a saturated solution of EDTA (3 mL). The organic layer was collected, dried over anhydrous Na<sub>2</sub>SO<sub>4</sub>, concentrated under reduced pressure, and the remaining material was purified by flash chromatography on silica gel (hexane/ ethyl acetate 95 : 5 v/v) to give the amine product **12** (51 mg, 59%) as a colorless liquid.

<sup>1</sup>H NMR (500 MHz, CDCl<sub>3</sub>): 7.20 (1 H, t, *J* = 7.6 Hz), 7.15 (1 H, d, *J* = 7.0 Hz), 7.07 (1 H, d, *J* = 2.0 Hz), 6.80–6.67 (1 H, m), 3.68 (1 H, brs), 2.97 (2 H, d, *J* = 6.7 Hz), 1.89 (1 H, dp, *J* = 13.3, 6.7 Hz), 1.35 (12 H, s), 0.99 (6 H, d, *J* = 6.7 Hz) ppm. – <sup>13</sup>C NMR (125 MHz, CDCl<sub>3</sub>): 148.1, 128.8, 123.6, 119.2, 115.4, 83.7, 51.8, 28.2, 25.0, 20.6 ppm. – <sup>11</sup>B NMR (160 MHz, CDCl<sub>3</sub>): 31.0 ppm. – IR: 3406, 3055, 2975, 2961, 1935, 1868, 1737, 1603, 1581, 1511, 1469, 1428, 1353, 1317, 1274, 1237, 1144, 1075, 990, 872, 751, 707 cm<sup>-1</sup>. – HRMS: calcd for C<sub>17</sub>H<sub>29</sub>BNO<sub>2</sub>: 290.2286, found 290.2283 [M+H<sup>+</sup>].



### 2-(Pentylamino)benzonitrile (**13**)<sup>[14]</sup>

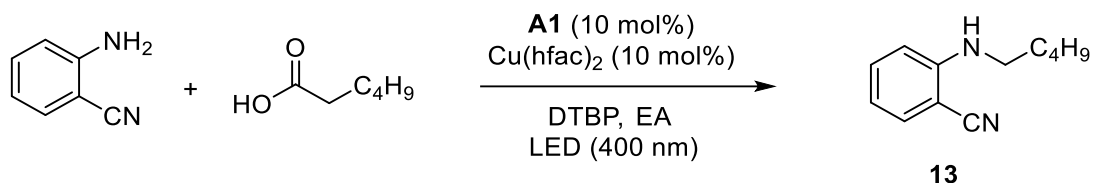

According to **GP1**, the reaction was carried out with 2-aminobenzonitrile (35 mg, 0.3 mmol), hexanoic acid (87 mg, 0.75 mmol, 2.5 equiv.), acridine **A1** (9 mg, 0.03 mmol, 10 mol%),  $\text{Cu}(\text{hfac})_2$  (14 mg, 0.03 mmol, 10 mol%), and DTBP (88 mg, 0.6 mmol, 2 equiv.) in ethyl acetate (4.5 mL). The reaction mixture was degassed using a stream of argon bubbled through a glass pipet reaching the bottom of the test-tube, while vigorous stirring was maintained for 3 min. The test-tube was capped and the reaction mixture was irradiated with LED light ( $\lambda = 400$  nm) while stirring for 12 h. The reaction mixture was then diluted with ethyl acetate (10 mL), extracted with a saturated solution of EDTA (3 mL). The organic layer was collected, dried over anhydrous  $\text{Na}_2\text{SO}_4$ , concentrated under reduced pressure, and the remaining material was purified by flash chromatography on silica gel (hexane/ ethyl acetate 95 : 5 v/v) to give the amine product **13** (45 mg, 80%) as a colorless liquid.

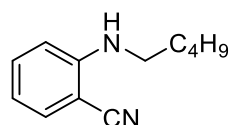

$^1\text{H}$  NMR (500 MHz,  $\text{CDCl}_3$ ): 7.41–7.35 (2 H, m), 6.68–6.58 (2 H, m), 4.54 (1 H, brs), 3.18 (2 H, td,  $J = 7.2, 5.1$  Hz), 1.66 (2 H, quint.,  $J = 7.2$  Hz), 1.43– 1.34 (4 H, dq,  $J = 7.4, 3.5$  Hz), 0.93 (3 H, t,  $J = 6.9$  Hz) ppm. –

$^{13}\text{C}$  NMR (125 MHz,  $\text{CDCl}_3$ ): 150.5, 134.3, 132.8, 118.1, 116.2, 110.6, 95.5, 43.4, 29.2, 28.9, 22.5, 14.1 ppm. – IR: 3380, 3054, 2964, 2930, 2859, 2211, 1694, 1606, 1577, 1515, 1460, 1326, 1264, 1166, 736, 704  $\text{cm}^{-1}$ .

### 2-(Ethylamino)benzonitrile (**14**)<sup>[15]</sup>

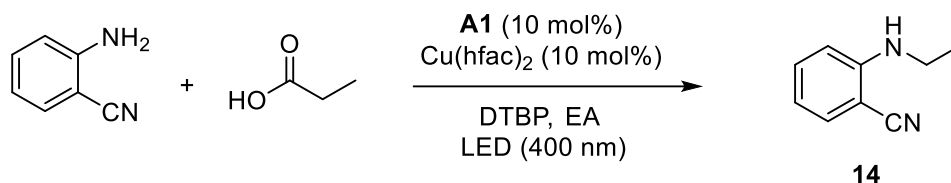

According to **GP1**, the reaction was carried out with 2-aminobenzonitrile (35 mg, 0.3 mmol), propanoic acid (56 mg, 0.75 mmol, 2.5 equiv.), acridine **A1** (9 mg, 0.03 mmol, 10 mol%), Cu(hfac)<sub>2</sub> (14 mg, 0.03 mmol, 10 mol%), and DTBP (88 mg, 0.6 mmol, 2 equiv.) in ethyl acetate (4.5 mL). The reaction mixture was degassed using a stream of argon bubbled through a glass pipet reaching the bottom of the test-tube, while vigorous stirring was maintained for 3 min. The test-tube was capped and the reaction mixture was irradiated with LED light ( $\lambda = 400$  nm) while stirring for 12 h. The reaction mixture was then diluted with ethyl acetate (10 mL), extracted with a saturated solution of EDTA (3 mL). The organic layer was collected, dried over anhydrous Na<sub>2</sub>SO<sub>4</sub>, concentrated under reduced pressure, and the remaining material was purified by flash chromatography on silica gel (hexane/ ethyl acetate 95 : 5 v/v) to give the amine product **14** (33 mg, 75%) as a pale yellow solid.

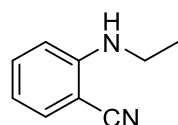

m.p.: 62–65 °C. – <sup>1</sup>H NMR (500 MHz, CDCl<sub>3</sub>): 7.40–7.35 (m, 2H), 6.68–6.63 (m, 2H), 4.47 (brs, 1H), 3.48–3.10 (m, 2H), 1.31 (t,  $J = 7.2$  Hz, 3H) ppm. – <sup>13</sup>C NMR (125 MHz, CDCl<sub>3</sub>): 150.4, 134.4, 132.9, 118.1, 116.4, 110.6, 95.6, 38.1, 14.6 ppm. – IR: 3427, 3061, 2977, 2213, 1606, 1582, 1526, 1421, 1264, 1178, 908, 733, 704 cm<sup>-1</sup>.

### **N-methylnaphthalen-1-amine (15)**<sup>[13]</sup>

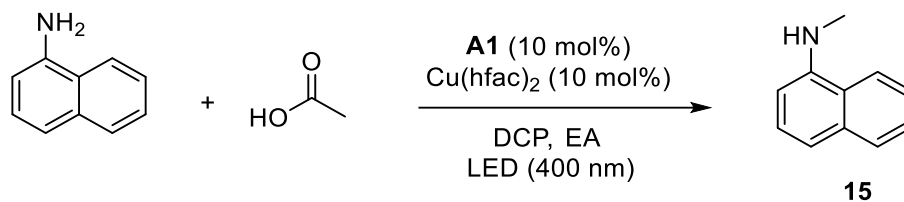

According to **GP1**, the reaction was carried out with naphthalen-1-amine (43 mg, 0.3 mmol), acetic acid (90 mg, 1.5 mmol, 5 equiv.), acridine **A1** (9 mg, 0.03 mmol, 10 mol%),  $\text{Cu}(\text{hfac})_2$  (14 mg, 0.03 mmol, 10 mol%), and DCP (120 mg, 0.45 mmol, 1.5 equiv.) in ethyl acetate (3 mL). The reaction mixture was degassed using a stream of argon bubbled through a glass pipet reaching the bottom of the test-tube, while vigorous stirring was maintained for 3 min. The test-tube was capped and the reaction mixture was irradiated with LED light ( $\lambda = 400$  nm) while stirring for 24 h. The reaction mixture was then diluted with ethyl acetate (10 mL), extracted with a saturated solution of EDTA (3 mL). The organic layer was collected, dried over anhydrous  $\text{Na}_2\text{SO}_4$ , concentrated under reduced pressure, and the remaining material was purified by flash chromatography on silica gel (hexane/ ethyl acetate 95 : 5 v/v) to give the amine product **15** (35 mg, 97%) as a colorless liquid.

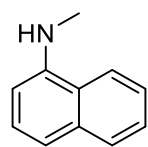

<sup>1</sup>H NMR (500 MHz,  $\text{CDCl}_3$ ): 7.88–7.75 (2 H, m), 7.45 (2 H, pd,  $J = 6.8, 1.4$  Hz), 7.39 (1 H, t,  $J = 7.9$  Hz), 7.26 (1 H, d,  $J = 8.2$  Hz), 6.62 (1 H, d,  $J = 7.5$  Hz), 4.44 (1 H, brs), 3.03 (3 H, s) ppm. – <sup>13</sup>C NMR (125 MHz,  $\text{CDCl}_3$ ): 144.6, 134.3, 128.8, 126.8, 125.8, 124.8, 123.6, 119.9, 117.4, 103.9, 31.2 ppm. – IR: 3438, 3048, 2983, 2922, 2845, 2812, 1622, 1581, 1527, 1486, 1403, 1370, 1342, 1286, 1253, 1171, 1150, 1113, 1064  $\text{cm}^{-1}$ .

### *N*-(5-Chloropentyl)-3,5-bis(trifluoromethyl)aniline (**16**)

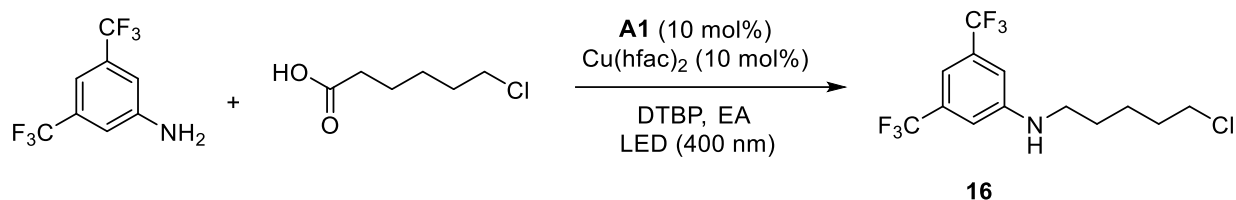

According to **GP1**, the reaction was carried out with 3,5-bis(trifluoromethyl)aniline (69 mg, 0.3 mmol), 6-chlorohexanoic acid (113 mg, 0.75 mmol, 2.5 equiv.), acridine **A1** (9 mg, 0.03 mmol, 10 mol%), Cu(hfac)<sub>2</sub> (14 mg, 0.03 mmol, 10 mol%), and DTBP (88 mg, 0.6 mmol, 2 equiv.) in ethyl acetate (3 mL). The reaction mixture was degassed using a stream of argon bubbled through a glass pipet reaching the bottom of the test-tube, while vigorous stirring was maintained for 3 min. The test-tube was capped and the reaction mixture was irradiated with LED light ( $\lambda = 400$  nm) while stirring for 12 h. The reaction mixture was then diluted with ethyl acetate (10 mL), extracted with a saturated solution of EDTA (3 mL). The organic layer was collected, dried over anhydrous Na<sub>2</sub>SO<sub>4</sub>, concentrated under reduced pressure, and the remaining material was purified by flash chromatography on silica gel (hexane/ ethyl acetate 95 : 5 v/v) to give the amine product **16** (80 mg, 80%) as a colorless liquid.

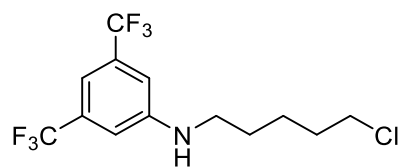

<sup>1</sup>H NMR (500 MHz, CDCl<sub>3</sub>): 7.21 (1 H, s), 7.03 (2 H, s), 3.54 (2 H, t,  $J = 6.6$  Hz), 2.39 (2 H, t,  $J = 7.5$  Hz), 1.80 (2 H, dt,  $J = 14.1, 6.8$  Hz), 1.68 (2 H, quint.,  $J = 7.2$  Hz), 1.59–1.42 (2 H, m) ppm. – <sup>13</sup>C NMR (125 MHz, CDCl<sub>3</sub>): 148.9, 132.5 (q, <sup>2</sup> $J_{C-F} = 32.6$  Hz), 123.7 (q, <sup>1</sup> $J_{C-F} = 273.0$  Hz), 111.8, 110.1 (q, <sup>3</sup> $J_{C-F} = 4.3$  Hz), 44.9, 43.5, 32.3, 28.5, 24.4 ppm. – <sup>19</sup>F NMR (471 MHz, CDCl<sub>3</sub>): –63.2 ppm. – IR: 3428, 2917, 2849, 1731, 1621, 1472, 1432, 1399, 1275, 1170, 1126, 1104, 995, 908, 861, 732, 701 cm<sup>-1</sup>. – HRMS: calcd for C<sub>13</sub>H<sub>15</sub>ClF<sub>6</sub>N: 334.0792, found 334.0792 [M+H<sup>+</sup>].

### N-Cyclohexyl-4-methoxyaniline (**17**)<sup>[16]</sup>

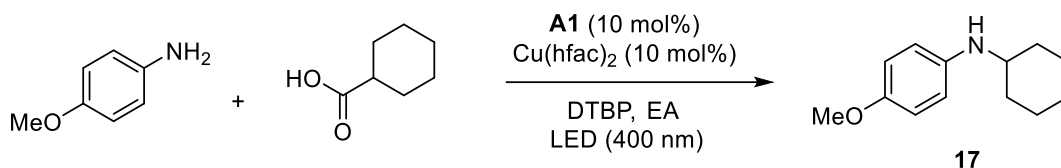

According to **GP1**, the reaction was carried out with *p*-anisidine (37 mg, 0.3 mmol), cyclohexanecarboxylic acid (96 mg, 0.75 mmol, 2.5 equiv.), acridine **A1** (9 mg, 0.03 mmol, 10 mol%), Cu(hfac)<sub>2</sub> (14 mg, 0.03 mmol, 10 mol%), and DTBP (88 mg, 0.6 mmol, 2 equiv.) in ethyl acetate (4.5 mL). The reaction mixture was degassed using a stream of argon bubbled through a glass pipet reaching the bottom of the test-tube, while vigorous stirring was maintained for 3 min. The test-tube was capped and the reaction mixture was irradiated with LED light ( $\lambda = 400$  nm) while stirring for 12 h. The reaction mixture was then diluted with ethyl acetate (10 mL), extracted with a saturated solution of EDTA (3 mL). The organic layer was collected, dried over anhydrous Na<sub>2</sub>SO<sub>4</sub>, concentrated under reduced pressure, and the remaining material was purified by flash chromatography on silica gel (hexane/ ethyl acetate 9 : 1 v/v) to give the amine product **17** (47 mg, 76%) as a colorless liquid.

<sup>1</sup>H NMR (500 MHz, CDCl<sub>3</sub>): 6.90–6.70 (2 H, m), 6.64–6.42 (2 H, m), 3.74 (3 H, s), 3.17 (1 H, tt, *J* = 10.2, 3.7 Hz), 2.76 (1 H, brs), 2.21–1.94 (2 H, m), 1.76 (2 H, dt, *J* = 13.9, 3.9 Hz), 1.69–1.56 (1 H, m), 1.44–1.29 (2 H, m), 1.28–1.18 (1 H, m), 1.16–1.01 (2 H, m) ppm. – <sup>13</sup>C NMR (125 MHz, CDCl<sub>3</sub>): 152.0, 141.7, 115.0, 115.0, 56.0, 52.9, 33.8, 26.1, 25.2 ppm. – IR: 3041, 2958, 2912, 2854, 2214, 1762, 1742, 1511, 1277, 1284, 1205, 1140, 1045 cm<sup>-1</sup>.

### N-Cyclohexyl-4-(difluoromethoxy)aniline (18)

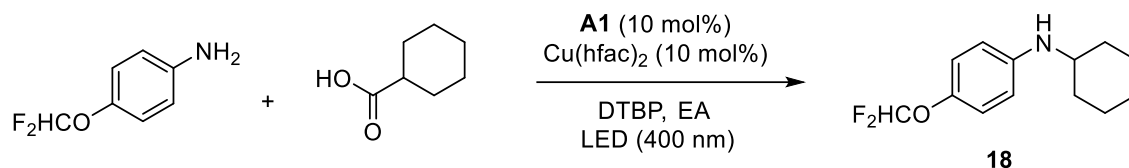

According to **GP1**, the reaction was carried out with 4-(difluoromethoxy)aniline (48 mg, 0.3 mmol), cyclohexanecarboxylic acid (96 mg, 0.75 mmol, 2.5 equiv.), acridine **A1** (9 mg, 0.03 mmol, 10 mol%),  $\text{Cu}(\text{hfac})_2$  (14 mg, 0.03 mmol, 10 mol%), and DTBP (88 mg, 0.6 mmol, 2 equiv.) in ethyl acetate (3 mL). The reaction mixture was degassed using a stream of argon bubbled through a glass pipet reaching the bottom of the test-tube, while vigorous stirring was maintained for 3 min. The test-tube was capped and the reaction mixture was irradiated with LED light ( $\lambda = 400 \text{ nm}$ ) while stirring for 14 h. The reaction mixture was then diluted with ethyl acetate (10 mL), extracted with a saturated solution of EDTA (3 mL). The organic layer was collected, dried over anhydrous  $\text{Na}_2\text{SO}_4$ , concentrated under reduced pressure, and the remaining material was purified by flash chromatography on silica gel (hexane/ ethyl acetate 95 : 5 v/v) to give the amine product **18** (52 mg, 72%) as a yellow liquid.

$^1\text{H NMR}$  (500 MHz,  $\text{CDCl}_3$ ): 6.95 (2 H d,  $J = 8.9 \text{ Hz}$ ), 6.53 (2 H, d,  $J = 8.9 \text{ Hz}$ ), 6.37 (1 H, t,  $J = 75.1 \text{ Hz}$ ), 3.51 (1 H, brs), 3.21 (1 H, tt,  $J = 10.2, 3.8 \text{ Hz}$ ), 2.14–2.00 (2 H, m), 1.77 (2 H, dt,  $J = 13.2, 3.6 \text{ Hz}$ ), 1.66 (1 H, dt,  $J = 12.7, 3.6 \text{ Hz}$ ), 1.43–1.32 (2 H, m), 1.30–1.04 (1 H, m) ppm. –  $^{13}\text{C NMR}$  (125 MHz,  $\text{CDCl}_3$ ): 145.5, 142.1, 121.6, 116.8 (t,  $^1J_{\text{C-F}} = 258.5 \text{ Hz}$ ), 113.7, 52.2, 33.5, 26.0, 25.1 ppm. –  $^{19}\text{F NMR}$  (471 MHz,  $\text{CDCl}_3$ ): –79.9 ppm. – IR: 3396, 3030, 2930, 2856, 1753, 1710, 1614, 1513, 1418, 1360, 1220, 1176, 1122, 1097, 1037, 822  $\text{cm}^{-1}$ . – HRMS: calcd for  $\text{C}_{13}\text{H}_{18}\text{F}_2\text{NO}$ : 242.1351, found 242.1351 [ $\text{M}+\text{H}^+$ ].

### *N*-(4-(Difluoromethoxy)phenyl)tetrahydro-2*H*-pyran-4-amine (**19**)

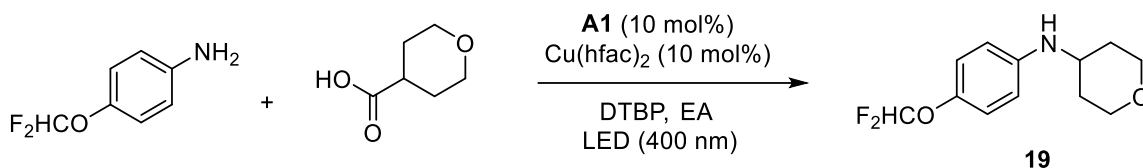

According to **GP1**, the reaction was carried out with 4-(difluoromethoxy)aniline (48 mg, 0.3 mmol), tetrahydro-2*H*-pyran-4-carboxylic acid (98 mg, 0.75 mmol, 2.5 equiv.), acridine **A1** (9 mg, 0.03 mmol, 10 mol%), Cu(hfac)<sub>2</sub> (14 mg, 0.03 mmol, 10 mol%), and DTBP (88 mg, 0.6 mmol, 2 equiv.) in ethyl acetate (3 mL). The reaction mixture was degassed using a stream of argon bubbled through a glass pipet reaching the bottom of the test-tube, while vigorous stirring was maintained for 3 min. The test-tube was capped and the reaction mixture was irradiated with LED light ( $\lambda = 400$  nm) while stirring for 12 h. The reaction mixture was then diluted with ethyl acetate (10 mL), extracted with a saturated solution of EDTA (3 mL). The organic layer was collected, dried over anhydrous Na<sub>2</sub>SO<sub>4</sub>, concentrated under reduced pressure, and the remaining material was purified by flash chromatography on silica gel (hexane/ ethyl acetate 4 : 1 v/v) to give the amine product **19** (40 mg, 55%) as a light brown solid.

<sup>1</sup>H NMR (500 MHz, CDCl<sub>3</sub>): 6.96 (2 H, d,  $J = 8.8$  Hz), 6.56 (2 H, d,  $J = 8.9$  Hz), 6.37 (1 H, t,  $J = 74.9$  Hz), 4.00 (2 H, dt,  $J = 11.8, 3.5$  Hz), 3.63–3.26 (3 H, m), 2.02 (2 H, dd,  $J = 12.5, 2.3$  Hz), 1.46 (2 H, qd,  $J = 11.1, 4.3$  Hz) ppm. – <sup>13</sup>C NMR (125 MHz, CDCl<sub>3</sub>): 144.8, 142.5, 121.7, 116.6 (t,  $^1J_{C-F} = 258.9$  Hz), 114.0, 67.0, 49.6, 33.6 ppm. – <sup>19</sup>F NMR (471 MHz, CDCl<sub>3</sub>): –80.1 (d,  $J = 74.8$  Hz) ppm. – IR: 2969, 2935, 2859, 2253, 1750, 1743, 1511, 1377, 1353, 1288, 1209, 1130, 1045, 909 cm<sup>-1</sup>. – HRMS: calcd for C<sub>12</sub>H<sub>16</sub>F<sub>2</sub>NO<sub>2</sub>: 244.1144, found 244.1148 [M+H<sup>+</sup>].

### N-Cyclohexylaniline (**20**)<sup>[11]</sup>

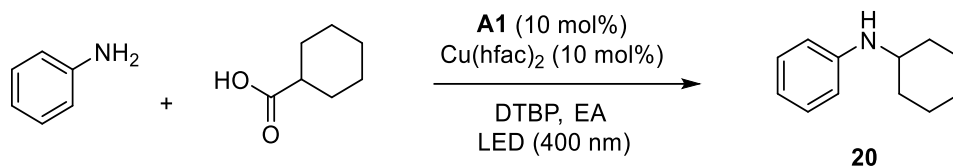

According to **GP2**, the reaction was carried out with aniline (70 mg, 0.75 mmol, 2.5 equiv.), cyclohexanecarboxylic acid (38 mg, 0.3 mmol), acridine **A1** (9 mg, 0.03 mmol, 10 mol%), Cu(hfac)<sub>2</sub> (14 mg, 0.03 mmol, 10 mol%), and DTBP (88 mg, 0.6 mmol, 2 equiv.) in ethyl acetate (3 mL). The reaction mixture was degassed using a stream of argon bubbled through a glass pipet reaching the bottom of the test-tube, while vigorous stirring was maintained for 3 min. The test-tube was capped and the reaction mixture was irradiated with LED light ( $\lambda = 400$  nm) while stirring for 12 h. The reaction mixture was then diluted with ethyl acetate (10 mL), extracted with a saturated solution of EDTA (3 mL). The organic layer was collected, dried over anhydrous Na<sub>2</sub>SO<sub>4</sub>, concentrated under reduced pressure, and the remaining material was purified by flash chromatography on silica gel (hexane/ ethyl acetate 95 : 5 v/v) to give the amine product **20** (39 mg, 74%) as a colorless liquid.

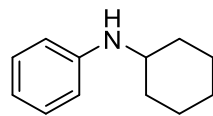 <sup>1</sup>H NMR (500 MHz, CDCl<sub>3</sub>): 7.16 (2 H, t,  $J = 7.8$  Hz), 6.67 (1 H, t,  $J = 7.3$  Hz), 6.60 (2 H, d,  $J = 7.9$  Hz), 3.51 (1 H, brs), 3.26 (1 H, tt,  $J = 10.2, 3.8$  Hz), 2.07 (2 H, dd,  $J = 13.0, 4.1$  Hz), 1.87–1.72 (2 H, m), 1.71–1.60 (1 H, m), 1.49–1.33 (2 H, m), 1.31–1.09 (3 H, m) ppm. – <sup>13</sup>C NMR (125 MHz, CDCl<sub>3</sub>): 147.5, 129.4, 117.0, 113.3, 51.8, 33.6, 26.1, 25.2 ppm. – IR: 3401, 2925, 2852, 1617, 1504, 1463, 1448, 1406, 1318, 1303, 1233, 1129, 1107 cm<sup>-1</sup>.



### *N*-(*p*-Tolyl)tetrahydro-2*H*-pyran-4-amine (**21**)

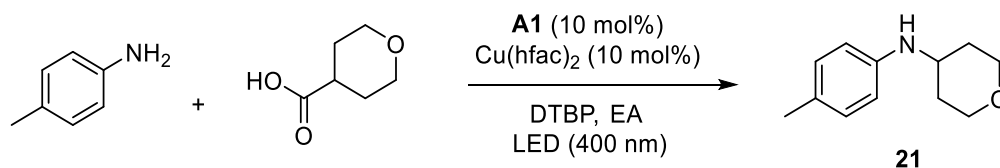

According to **GP1**, the reaction was carried out with *p*-toluidine (32 mg, 0.3 mmol), tetrahydro-2*H*-pyran-4-carboxylic acid (98 mg, 0.75 mmol, 2.5 equiv.), acridine **A1** (9 mg, 0.03 mmol, 10 mol%), Cu(hfac)<sub>2</sub> (14 mg, 0.03 mmol, 10 mol%), and DTBP (88 mg, 0.6 mmol, 2 equiv.) in ethyl acetate (3 mL). The reaction mixture was degassed using a stream of argon bubbled through a glass pipet reaching the bottom of the test-tube, while vigorous stirring was maintained for 3 min. The test-tube was capped and the reaction mixture was irradiated with LED light ( $\lambda = 400$  nm) while stirring for 14 h. The reaction mixture was then diluted with ethyl acetate (10 mL), extracted with a saturated solution of EDTA (3 mL). The organic layer was collected, dried over anhydrous Na<sub>2</sub>SO<sub>4</sub>, concentrated under reduced pressure, and the remaining material was purified by flash chromatography on silica gel (hexane/ ethyl acetate 95 : 5 v/v) to give the amine product **21** (51 mg, 89%) as a colorless liquid.

<sup>1</sup>H NMR (500 MHz, CDCl<sub>3</sub>): 7.00 (2 H, d, *J* = 8.1 Hz), 6.56 (2 H, d, *J* = 8.1 Hz), 4.01 (2 H, dt, *J* = 11.7, 3.2 Hz), 3.50 (3H, dtd, *J* = 17.8, 11.0, 10.4, 4.1 Hz), 2.25 (3 H, s), 2.04 (2 H, dd, *J* = 12.7, 2.3 Hz), 1.46 (2 H, qd, *J* = 11.0, 4.3 Hz) ppm. –  
<sup>13</sup>C NMR (125 MHz, CDCl<sub>3</sub>): 144.5, 129.9, 126.9, 113.8, 67.2, 49.6, 33.8, 20.5 ppm. – IR: 3350, 3024, 2953, 2917, 2845, 1735, 1616, 1584, 1536, 1466, 1380, 1317, 1280, 1260, 1168, 1085, 1043, 1010, 981, 868 cm<sup>-1</sup>. – HRMS: calcd for C<sub>12</sub>H<sub>18</sub>NO: 192.1383, found 192.1384 [M+H<sup>+</sup>].

### *N*-Cyclohexyl-4-fluoroaniline (**22**)<sup>[11]</sup>

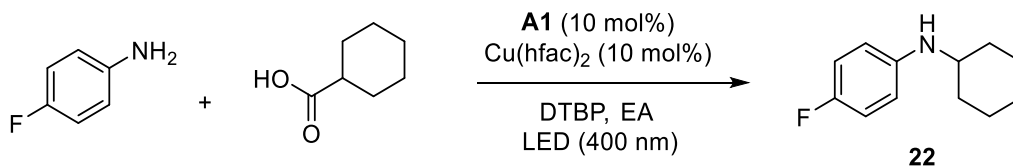

According to **GP1**, the reaction was carried out with 4-fluoroaniline (33 mg, 0.3 mmol), cyclohexanecarboxylic acid (96 mg, 0.75 mmol, 2.5 equiv.), acridine **A1** (9 mg, 0.03 mmol, 10 mol%),  $\text{Cu}(\text{hfac})_2$  (14 mg, 0.03 mmol, 10 mol%), and DTBP (88 mg, 0.6 mmol, 2 equiv.) in ethyl acetate (3 mL). The reaction mixture was degassed using a stream of argon bubbled through a glass pipet reaching the bottom of the test-tube, while vigorous stirring was maintained for 3 min. The test-tube was capped and the reaction mixture was irradiated with LED light ( $\lambda = 400$  nm) while stirring for 24 h. The reaction mixture was then diluted with ethyl acetate (10 mL), extracted with a saturated solution of EDTA (3 mL). The organic layer was collected, dried over anhydrous  $\text{Na}_2\text{SO}_4$ , concentrated under reduced pressure, and the remaining material was purified by flash chromatography on silica gel (hexane/ ethyl acetate 95 :95 v/v) to give the amine product **22** (45 mg, 78%) as a colorless liquid.

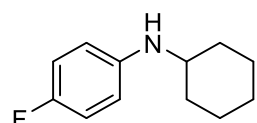

$^1\text{H}$  NMR (500 MHz,  $\text{CDCl}_3$ ): 7.16–6.80 (2 H, m), 6.73–6.43 (2 H, m), 3.39 (1 H, brs), 3.17 (1 H, tt,  $J = 10.2, 3.7$  Hz), 2.04 (2 H, dd,  $J = 13.0, 3.6$  Hz), 1.76 (2 H, dt,  $J = 13.5, 3.9$  Hz), 1.65 (1 H, dt,  $J = 12.7, 3.7$  Hz), 1.44–1.31 (2 H, m), 1.29–1.05 (3 H, m) ppm. –  $^{13}\text{C}$  NMR (125 MHz,  $\text{CDCl}_3$ ): 155.7 (d,  $^1J_{\text{C-F}} = 234.4$  Hz), 143.8, 115.8 (d,  $^2J_{\text{C-F}} = 22.0$  Hz), 114.2 (d,  $^3J_{\text{C-F}} = 7.3$  Hz), 52.6, 33.6, 26.1, 25.2 ppm. –  $^{19}\text{F}$  NMR (471 MHz,  $\text{CDCl}_3$ ): –128.7 (t,  $J = 4.8$  Hz) ppm. – IR: 3409, 2926, 2951, 1613, 1507, 1450, 1402, 1305, 1254, 1218, 1155, 1116, 1091  $\text{cm}^{-1}$ .

### 4-Chloro-*N*-cyclohexylaniline (**23**)<sup>[11]</sup>

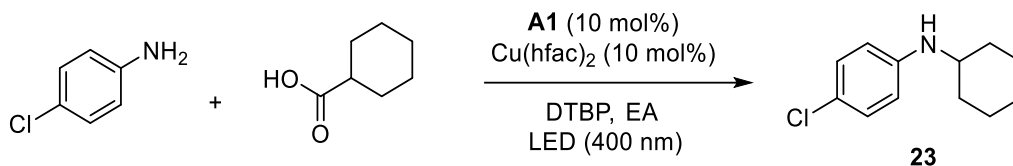

According to **GP1**, the reaction was carried out with 4-chloroaniline (38 mg, 0.3 mmol), cyclohexanecarboxylic acid (96 mg, 0.75 mmol, 2.5 equiv.), acridine **A1** (9 mg, 0.03 mmol, 10 mol%), Cu(hfac)<sub>2</sub> (14 mg, 0.03 mmol, 10 mol%), and DTBP (88 mg, 0.6 mmol, 2 equiv.) in ethyl acetate (3 mL). The reaction mixture was degassed using a stream of argon bubbled through a glass pipet reaching the bottom of the test-tube, while vigorous stirring was maintained for 3 min. The test-tube was capped and the reaction mixture was irradiated with LED light ( $\lambda = 400$  nm) while stirring for 24 h. The reaction mixture was then diluted with ethyl acetate (10 mL), extracted with a saturated solution of EDTA (3 mL). The organic layer was collected, dried over anhydrous Na<sub>2</sub>SO<sub>4</sub>, concentrated under reduced pressure, and the remaining material was purified by flash chromatography on silica gel (hexane/ ethyl acetate 95 : 5 v/v) to give the amine product **23** (45 mg, 72%) as a colorless solid.

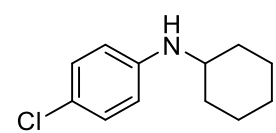

m.p.: 47–50 °C. – <sup>1</sup>H NMR (500 MHz, CDCl<sub>3</sub>): 7.22–6.75 (2 H, m), 6.64–6.16 (2 H, m), 3.52 (1 H, brs), 3.20 (1 H, tt,  $J = 10.2, 3.7$  Hz), 2.03 (2 H, dd,  $J = 12.8, 3.1$  Hz), 1.76 (2 H, dt,  $J = 13.3, 3.7$  Hz), 1.66 (1 H, dt,  $J = 12.8, 3.7$  Hz), 1.45–1.30 (2 H, m), 1.29–1.05 (3 H, m) ppm. – <sup>13</sup>C NMR (125 MHz, CDCl<sub>3</sub>): 146.0, 129.2, 121.4, 114.3, 52.0, 33.440, 26.0, 25.1 ppm. – IR: 3415, 3068, 3034, 2935, 2857, 2660, 1869, 1598, 1500, 1454, 1400, 1387, 1294, 1262, 1255, 1229, 1174, 1092, 1027 cm<sup>-1</sup>.

### 4-Bromo-N-cyclohexylaniline (**24**)<sup>[11]</sup>

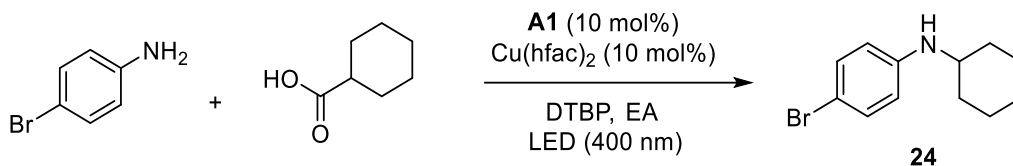

According to **GP1**, the reaction was carried out with 4-bromoaniline (51 mg, 0.3 mmol), cyclohexanecarboxylic acid (96 mg, 0.75 mmol, 2.5 equiv.), acridine **A1** (9 mg, 0.03 mmol, 10 mol%), Cu(hfac)<sub>2</sub> (14 mg, 0.03 mmol, 10 mol%), and DTBP (88 mg, 0.6 mmol, 2 equiv.) in ethyl acetate (3 mL). The reaction mixture was degassed using a stream of argon bubbled through a glass pipet reaching the bottom of the test-tube, while vigorous stirring was maintained for 3 min. The test-tube was capped and the reaction mixture was irradiated with LED light ( $\lambda = 400$  nm) while stirring for 24 h. The reaction mixture was then diluted with ethyl acetate (10 mL), extracted with a saturated solution of EDTA (3 mL). The organic layer was collected, dried over anhydrous Na<sub>2</sub>SO<sub>4</sub>, concentrated under reduced pressure, and the remaining material was purified by flash chromatography on silica gel (hexane/ ethyl acetate 95 : 5 v/v) to give the amine product **24** (53 mg, 69%) as a colorless solid.

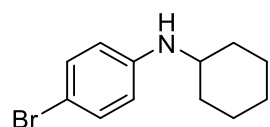

m.p.: 50–52 °C. – <sup>1</sup>H NMR (500 MHz, CDCl<sub>3</sub>): 7.32–6.82 (2 H, m), 6.68–6.24 (2 H, m), 3.57 (1 H, brs), 3.20 (1 H, tt,  $J = 10.2, 3.7$  Hz), 2.03 (2 H, dd,  $J = 13.2, 4.0$  Hz), 1.76 (2 H, dt,  $J = 13.6, 3.8$  Hz), 1.65 (1 H, dt,  $J = 12.8, 3.7$  Hz), 1.48–1.30 (2 H, m), 1.29–1.03 (3 H, m) ppm. – <sup>13</sup>C NMR (125 MHz, CDCl<sub>3</sub>): 146.4, 132.0, 114.8, 108.3, 51.9, 33.4, 25.0, 25.1 ppm. – IR: 3413, 3011, 2928, 2853, 1592, 1493, 1462, 1449, 1397, 1367, 1314, 1254, 1214, 1106 cm<sup>-1</sup>.

### Methyl (1*S*\*,2*S*\*)-2-(phenylamino)cyclohexane-1-carboxylate (**25**)<sup>[17]</sup>

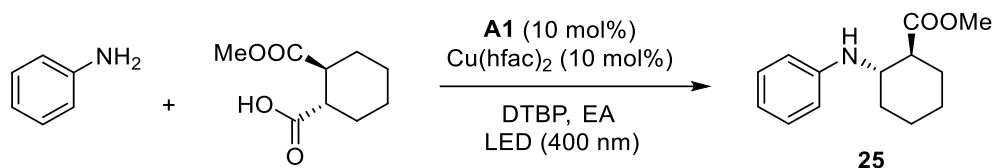

According to **GP2**, the reaction was carried out with aniline (70 mg, 0.75 mmol, 2.5 equiv.), (1*S*\*,2*S*\*)-2-(methoxycarbonyl)cyclohexane-1-carboxylic acid (56 mg, 0.3 mmol), acridine **A1** (9 mg, 0.03 mmol, 10 mol%), Cu(hfac)<sub>2</sub> (14 mg, 0.03 mmol, 10 mol%), and DTBP (88 mg, 0.6 mmol, 2 equiv.) in ethyl acetate (4.5 mL). The reaction mixture was degassed using a stream of argon bubbled through a glass pipet reaching the bottom of the test-tube, while vigorous stirring was maintained for 3 min. The test-tube was capped and the reaction mixture was irradiated with LED light ( $\lambda = 400$  nm) while stirring for 36 h. The reaction mixture was then diluted with ethyl acetate (10 mL), extracted with a saturated solution of EDTA (3 mL). The organic layer was collected, dried over anhydrous Na<sub>2</sub>SO<sub>4</sub>, concentrated under reduced pressure, and the remaining material was purified by flash chromatography on silica gel (hexane/ ethyl acetate 95 : 5 v/v) to give the amine product **25** (42 mg, 60%) as a colorless liquid.

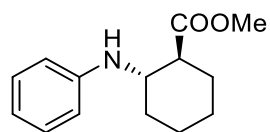

<sup>1</sup>H NMR (500 MHz, CDCl<sub>3</sub>): 7.14 (2 H, t,  $J = 7.6$  Hz), 6.68 (1 H, t,  $J = 7.4$  Hz), 6.62 (2 H, d,  $J = 7.9$  Hz), 3.72–3.37 (5 H, m), 2.30 (1 H, t,  $J = 12.0$  Hz), 2.21 (1 H, d,  $J = 11.3$  Hz), 1.96 (1 H, d,  $J = 13.0$  Hz), 1.77 (2 H, d,  $J = 12.3$  Hz), 1.66 (1 H, q,  $J = 12.4, 12.0$  Hz), 1.39 (1 H, q,  $J = 12.7$  Hz), 1.32–1.20 (1 H, m), 1.07 (1 H, q,  $J = 11.4$  Hz) ppm. – <sup>13</sup>C NMR (125 MHz, CDCl<sub>3</sub>): 175.4, 147.2, 129.3, 117.7, 113.9, 54.2, 51.8, 51.0, 33.0, 29.1, 24.9, 24.8 ppm. – IR: 3365, 3058, 3021, 2933, 2856, 1730, 1601, 1497, 1448, 1434, 1322, 1262, 1192, 1169, 1031, 867, 749, 693 cm<sup>-1</sup>.

### Methyl (1*S*\*,2*S*\*)-2-((3-isopropylphenyl)amino)cyclohexane-1-carboxylate (**26**)

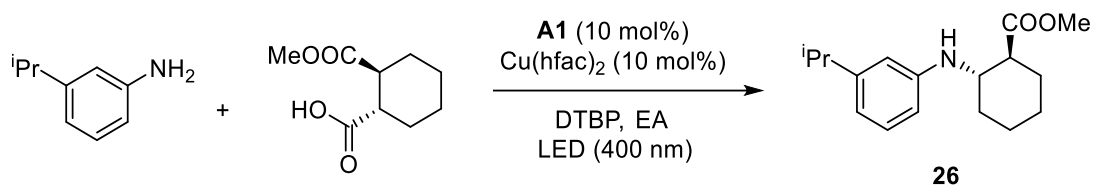

According to **GP2**, the reaction was carried out with 3-isopropylaniline (101 mg, 0.75 mmol, 2.5 equiv.), (1*S*\*,2*S*\*)-2-(methoxycarbonyl)cyclohexane-1-carboxylic acid (56 mg, 0.3 mmol), acridine **A1** (9 mg, 0.03 mmol, 10 mol%), Cu(hfac)<sub>2</sub> (14 mg, 0.03 mmol, 10 mol%), and DTBP (88 mg, 0.6 mmol, 2 equiv.) in ethyl acetate (4.5 mL). The reaction mixture was degassed using a stream of argon bubbled through a glass pipet reaching the bottom of the test-tube, while vigorous stirring was maintained for 3 min. The test-tube was capped and the reaction mixture was irradiated with LED light ( $\lambda = 400$  nm) while stirring for 36 h. The reaction mixture was then diluted with ethyl acetate (10 mL), extracted with a saturated solution of EDTA (3 mL). The organic layer was collected, dried over anhydrous Na<sub>2</sub>SO<sub>4</sub>, concentrated under reduced pressure, and the remaining material was purified by flash chromatography on silica gel (hexane/ ethyl acetate 95 : 5 v/v) to give the amine product **26** (50 mg, 61%) as a brown solid.

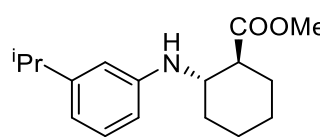

<sup>1</sup>H NMR (500 MHz, CDCl<sub>3</sub>): 7.08 (1 H, t,  $J = 7.7$  Hz), 6.58 (1 H, d,  $J = 7.5$  Hz), 6.52–6.44 (2 H, m), 3.60 (3 H, s), 3.57 (1 H, dd,  $J = 10.3, 3.8$  Hz), 3.43 (1 H, brs), 2.81 (1 H, hept,  $J = 6.7$  Hz), 2.31 (1 H, ddd,  $J = 13.8, 10.3, 3.7$  Hz), 2.23 (1 H, dd,  $J = 13.4, 3.9$  Hz), 2.03–1.91 (1 H, m), 1.78 (2 H, d,  $J = 12.7$  Hz), 1.68 (2 H q,  $J = 12.4, 12.0$  Hz), 1.40 (1 H, q,  $J = 12.8$  Hz), 1.32–1.26 (1 H, m), 1.23 (6 H, d,  $J = 7.0$  Hz), 1.07 (1 H, q,  $J = 12.9$  Hz) ppm. – <sup>13</sup>C NMR (125 MHz, CDCl<sub>3</sub>): 175.4, 150.1, 147.2, 129.2, 115.9, 112.4, 111.2, 54.2, 51.8, 50.9, 34.3, 33.0, 29.0, 24.8, 24.1 ppm. – IR: 3366, 3035, 2967, 2931, 2856, 1728, 1604, 1587, 1514, 1485, 1448, 1321, 1269, 1251, 1192, 1167, 1027, 855, 777, 700 cm<sup>-1</sup>. – HRMS: calcd for C<sub>17</sub>H<sub>26</sub>NO<sub>2</sub>: 276.1958, found 276.1958 [M+H<sup>+</sup>].

### N-Cyclohexyl-3-(methylsulfonyl)aniline (**27**)

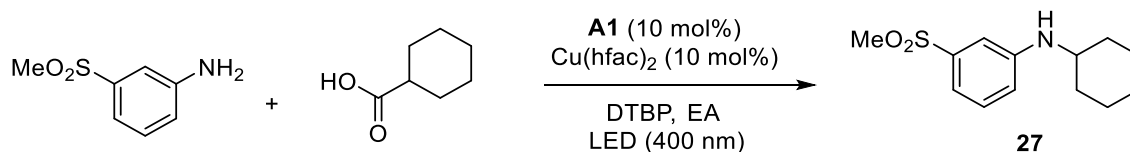

According to **GP1**, the reaction was carried out with 3-(methylsulfonyl)aniline (51 mg, 0.3 mmol), cyclohexanecarboxylic acid (96 mg, 0.75 mmol, 2.5 equiv.), acridine **A1** (9 mg, 0.03 mmol, 10 mol%),  $\text{Cu}(\text{hfac})_2$  (14 mg, 0.03 mmol, 10 mol%), and DTBP (88 mg, 0.6 mmol, 2 equiv.) in ethyl acetate (3 mL). The reaction mixture was degassed using a stream of argon bubbled through a glass pipet reaching the bottom of the test-tube, while vigorous stirring was maintained for 3 min. The test-tube was capped and the reaction mixture was irradiated with LED light ( $\lambda = 400$  nm) while stirring for 12 h. The reaction mixture was then diluted with ethyl acetate (10 mL), extracted with a saturated solution of EDTA (3 mL). The organic layer was collected, dried over anhydrous  $\text{Na}_2\text{SO}_4$ , concentrated under reduced pressure, and the remaining material was purified by flash chromatography on silica gel (hexane/ ethyl acetate 4 : 1 v/v) to give the amine product **27** (53 mg, 71%) as a colorless liquid.

$^1\text{H}$  NMR (500 MHz,  $\text{CDCl}_3$ ): 7.28 (1 H, t,  $J = 7.9$  Hz), 7.13 (1 H, d,  $J = 7.6$  Hz), 7.06 (1 H, t,  $J = 1.9$  Hz), 6.76 (1 H, dd,  $J = 8.2, 1.8$  Hz), 4.16 (1 H, brs), 3.29 (1 H, td,  $J = 10.0, 4.9$  Hz), 3.02 (3 H, s), 2.02 (2 H, d,  $J = 9.6$  Hz), 1.75 (2 H, dt,  $J = 12.9, 3.2$  Hz), 1.65 (1 H, d,  $J = 12.9$  Hz), 1.38 (2 H, q,  $J = 12.1$  Hz), 1.19 (3 H, dq,  $J = 25.0, 12.6$  Hz) ppm. –  $^{13}\text{C}$  NMR (125 MHz,  $\text{CDCl}_3$ ): 148.1, 141.4, 130.3, 117.7, 114.8, 110.5, 51.6, 44.5, 3.20, 25.8, 24.9 ppm. – IR: 3384, 1084, 3033, 2928, 2853, 2255, 1737, 1599, 1515, 1486, 1449, 1370, 1297, 126, 1231, 1150, 1088, 991, 858  $\text{cm}^{-1}$ . – HRMS: calcd for  $\text{C}_{13}\text{H}_{20}\text{NO}_2\text{S}$ : 254.1209, found 254.1204  $[\text{M}+\text{H}^+]$ .

### **N-Isopropyl-3,4,5-trimethylaniline (28)**<sup>[18]</sup>

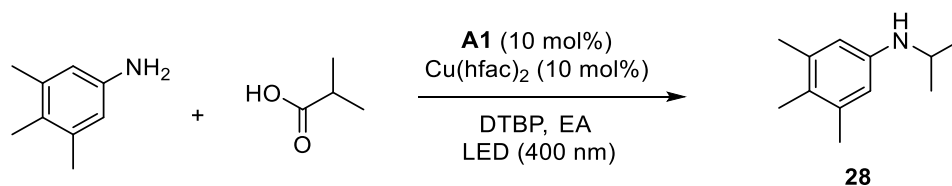

According to **GP1**, the reaction was carried out with 3,4,5-trimethylaniline (41 mg, 0.3 mmol), isobutyric acid (66 mg, 0.75 mmol, 2.5 equiv.), acridine **A1** (9 mg, 0.03 mmol, 10 mol%), Cu(hfac)<sub>2</sub> (14 mg, 0.03 mmol, 10 mol%), and DTBP (88 mg, 0.6 mmol, 2 equiv.) in ethyl acetate (3 mL). The reaction mixture was degassed using a stream of argon bubbled through a glass pipet reaching the bottom of the test-tube, while vigorous stirring was maintained for 3 min. The test-tube was capped and the reaction mixture was irradiated with LED light ( $\lambda = 400$  nm) while stirring for 14 h. The reaction mixture was then diluted with ethyl acetate (10 mL), extracted with a saturated solution of EDTA (3 mL). The organic layer was collected, dried over anhydrous Na<sub>2</sub>SO<sub>4</sub>, concentrated under reduced pressure, and the remaining material was purified by flash chromatography on silica gel (hexane/ ethyl acetate 95 : 5 v/v) to give the amine product **28** (35 mg, 66%) as a yellow liquid.

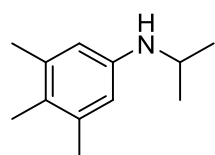

<sup>1</sup>H NMR (500 MHz, CDCl<sub>3</sub>): 6.31 (2 H, s), 3.60 (1 H, hept,  $J = 6.3$  Hz), 2.22 (6 H, s), 2.07 (3 H, s), 1.19 (6 H, d,  $J = 6.3$  Hz) ppm. – <sup>13</sup>C NMR (125 MHz, CDCl<sub>3</sub>): 145.1, 137.3, 123.7, 113.2, 44.5, 23.3, 21.0, 14.5 ppm. – IR: 3323, 3003, 2948, 2885, 2854, 1743, 1709, 1667, 1546, 1484, 1514, 1484, 1440, 1388, 1221, 1194, 1148, 1091, 1013 cm<sup>-1</sup>.



### *N*-(4-Methoxyphenyl)adamantan-1-amine (**29**)<sup>[19]</sup>

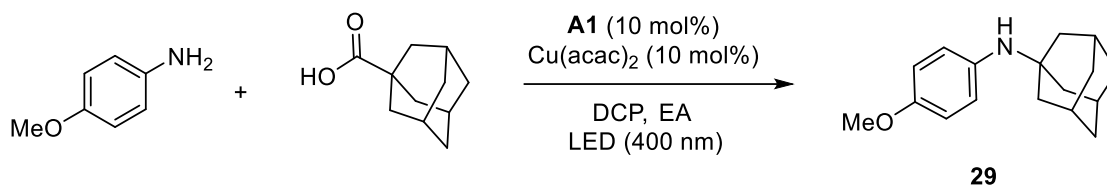

According to **GP2**, the reaction was carried out with *p*-anisidine (92 mg, 0.75 mmol, 2.5 equiv.), adamantane-1-carboxylic acid (54 mg, 0.3 mmol), acridine **A1** (9 mg, 0.03 mmol, 10 mol%), Cu(acac)<sub>2</sub> (8 mg, 0.03 mmol, 10 mol%), and DCP (120 mg, 0.45 mmol, 1.5 equiv.) in ethyl acetate (4.5 mL). The reaction mixture was degassed using a stream of argon bubbled through a glass pipet reaching the bottom of the test-tube, while vigorous stirring was maintained for 3 min. The test-tube was capped and the reaction mixture was irradiated with LED light ( $\lambda = 400$  nm) while stirring for 36 h. The reaction mixture was then extracted with concentrated HCl (2 x 10 mL), neutralized the aqueous phase with solid sodium carbonate, and back extracted with ethyl acetate (3x 15 mL). The organic layer was collected, dried over anhydrous Na<sub>2</sub>SO<sub>4</sub>, concentrated under reduced pressure, and the remaining material was purified by flash chromatography on silica gel (hexane/ ethyl acetate 4 : 1 v/v) to give the amine product **29** (40 mg, 51%) as a pale brown solid.

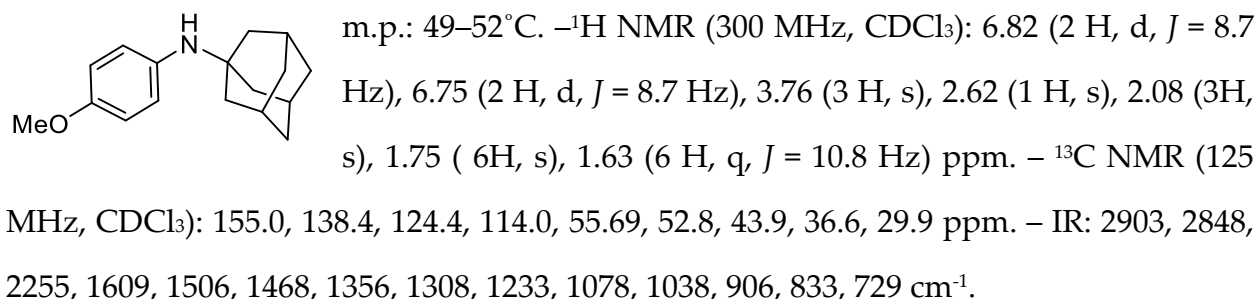

### *N*-(*p*-Tolyl)adamantan-1-amine (**30**)<sup>[19]</sup>

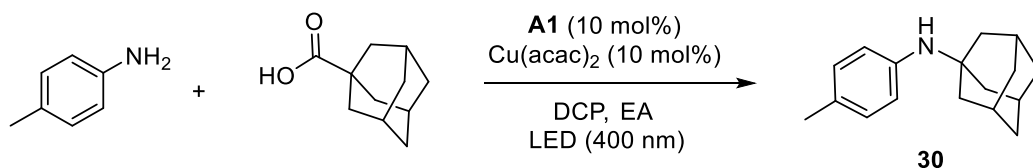

According to **GP2**, the reaction was carried out with *p*-toluidine (80 mg, 0.75 mmol, 2.5 equiv.), adamantane-1-carboxylic acid (54 mg, 0.3 mmol), acridine **A1** (9 mg, 0.03 mmol, 10 mol%), Cu(acac)<sub>2</sub> (8 mg, 0.03 mmol, 10 mol%), and DCP (120 mg, 0.45 mmol, 1.5 equiv.) in ethyl acetate (4.5 mL). The reaction mixture was degassed using a stream of argon bubbled through a glass pipet reaching the bottom of the test-tube, while vigorous stirring was maintained for 3 min. The test-tube was capped and the reaction mixture was irradiated with LED light ( $\lambda = 400$  nm) while stirring for 36 h. The reaction mixture was then extracted with concentrated HCl (2 x 10 mL), neutralized the aqueous phase with solid sodium carbonate, and back extracted with ethyl acetate (3x 15 mL). The organic layer was collected, dried over anhydrous Na<sub>2</sub>SO<sub>4</sub>, concentrated under reduced pressure, and the remaining material was purified by flash chromatography on silica gel (hexane/ ethyl acetate 95 : 5 v/v) to give the amine product **30** (59 mg, 81%) as a pale brown solid.

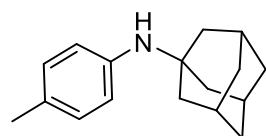

m.p.: 60–62°C. <sup>1</sup>H NMR (500 MHz, CDCl<sub>3</sub>): 6.98 (2 H, d, *J* = 7.9 Hz), 6.75 (2 H, d, *J* = 7.9 Hz), 2.71 (1 H, brs), 2.26 (3 H, s), 2.09 (3 H, s), 1.82 (6 H, s), 1.66 (6 H, q, *J* = 12.5 Hz) ppm. – <sup>13</sup>C NMR (125 MHz, CDCl<sub>3</sub>):

143.2, 129.6, 129.3, 121.0, 52.5, 43.8, 36.6, 29.9, 20.7 ppm. – IR: 3063, 2977, 2945, 2908, 2854, 1756, 1743, 1625, 1510, 1450, 1264, 1256, 907, 731, 705 cm<sup>-1</sup>.

### ***N*-4-(Trifluoromethyl)phenyladamantan-1-amine (**31**)<sup>[20]</sup>**

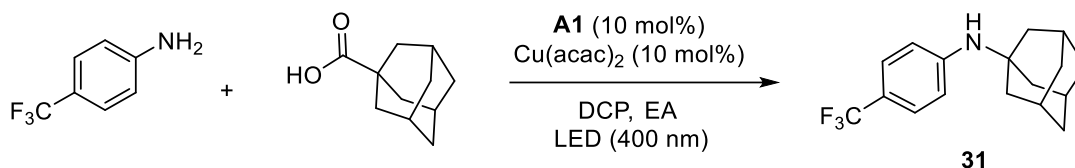

According to **GP2**, the reaction was carried out with 4-(trifluoromethyl)aniline (121 mg, 0.75 mmol, 2.5 equiv.), adamantane-1-carboxylic acid (54 mg, 0.3 mmol), acridine **A1** (9 mg, 0.03 mmol, 10 mol%), Cu(acac)<sub>2</sub> (8 mg, 0.03 mmol, 10 mol%), and DCP (120 mg, 0.45 mmol, 1.5 equiv.) in ethyl acetate (3 mL). The reaction mixture was degassed using a stream of argon bubbled through a glass pipet reaching the bottom of the test-tube, while vigorous stirring was maintained for 3 min. The test-tube was capped and the reaction mixture was irradiated with LED light ( $\lambda = 400$  nm) while stirring for 12 h. The reaction mixture was then extracted with concentrated HCl (2 x 10 mL), neutralized the aqueous phase with solid sodium carbonate, and back extracted with ethyl acetate (3x 15 mL). The organic layer was collected, dried over anhydrous Na<sub>2</sub>SO<sub>4</sub>, concentrated under reduced pressure, and the remaining material was purified by flash chromatography on silica gel (hexane/ ethyl acetate 95 : 5 v/v) to give the amine product **31** (50 mg, 56%) as a colorless solid.

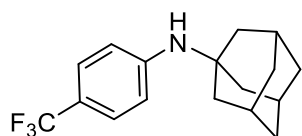

m.p.: 68–71°C. <sup>1</sup>H NMR (500 MHz, CDCl<sub>3</sub>): 7.34 (2 H, d,  $J = 8.4$  Hz), 6.74 (2 H, d,  $J = 8.3$  Hz), 2.14 (3 H, s), 1.95 (6 H, s), 1.78 – 1.64 (6H, m) ppm. <sup>13</sup>C NMR (125 MHz, CDCl<sub>3</sub>): 149.2 (q,  $^2J_{\text{C-F}} = 7.8$  Hz), 146.3, 126.8 (q,  $^1J_{\text{C-F}} = 273.5$  Hz), 126.3 (q,  $^3J_{\text{C-F}} = 3.7$  Hz), 115.5, 42.9, 36.5, 29.8 ppm. <sup>19</sup>F NMR (471 MHz, CDCl<sub>3</sub>): –61.1 ppm. – IR: 3429, 2908, 2852, 1615, 1528, 1505, 1460, 1327, 1308, 1289, 1187, 1162, 1112, 1066, 905, 826, 730 cm<sup>-1</sup>.

### N-(3,4,5-Trimethylphenyl)adamantan-1-amine (32)

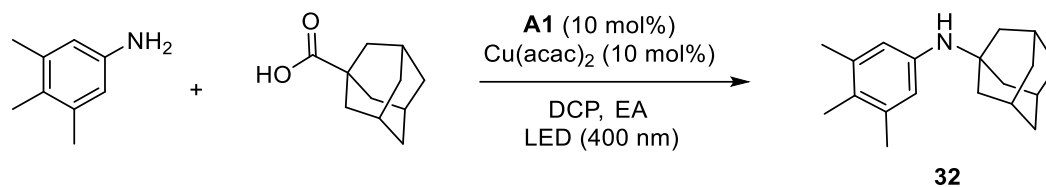

According to **GP2**, the reaction was carried out with 3,4,5-trimethylaniline (101 mg, 0.75 mmol, 2.5 equiv.), adamantane-1-carboxylic acid (54 mg, 0.3 mmol), acridine **A1** (9 mg, 0.03 mmol, 10 mol%),  $\text{Cu}(\text{acac})_2$  (8 mg, 0.03 mmol, 10 mol%), and DCP (120 mg, 0.45 mmol, 1.5 equiv.) in ethyl acetate (4.5 mL). The reaction mixture was degassed using a stream of argon bubbled through a glass pipet reaching the bottom of the test-tube, while vigorous stirring was maintained for 3 min. The test-tube was capped and the reaction mixture was irradiated with LED light ( $\lambda = 400$  nm) while stirring for 36 h. The reaction mixture was then extracted with concentrated HCl (2 x 10 mL), neutralized the aqueous phase with solid sodium carbonate, and back extracted with ethyl acetate (3x 15 mL). The organic layer was collected, dried over anhydrous  $\text{Na}_2\text{SO}_4$ , concentrated under reduced pressure, and the remaining material was purified by flash chromatography on silica gel (hexane/ ethyl acetate 95 : 5 v/v) to give the amine product **32** (59 mg, 74%) as a yellow solid.

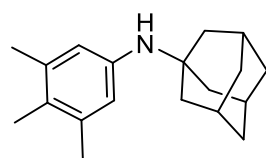

m.p.: 68–71 °C. –  $^1\text{H}$  NMR (500 MHz,  $\text{CDCl}_3$ ): 6.54 (2 H, s), 2.23 (6 H, s), 2.10 (6 H, s), 1.84 (6 H, s), 1.66 (6 H, q,  $J = 10.7$  Hz) ppm. –  $^{13}\text{C}$  NMR (125 MHz,  $\text{CDCl}_3$ ): 142.9, 136.6, 126.9, 120.4, 43.8, 36.6, 29.9, 20.9, 14.7

ppm. – IR: 3066, 3006, 2961, 2906, 2854, 1608, 1492, 1369, 1059, 893, 809  $\text{cm}^{-1}$ . – HRMS: calcd for  $\text{C}_{19}\text{H}_{28}\text{N}$ : 270.2216, found 270.2219 [ $\text{M}+\text{H}^+$ ].

### *N*-Isobutyl-4-methoxy-*N*-methylaniline (**33**)

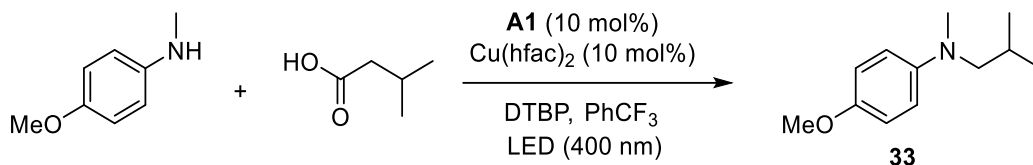

According to **GP2**, the reaction was carried out with 4-methoxy-*N*-methylaniline (103 mg, 0.75 mmol, 2.5 equiv.), isovaleric acid (31 mg, 0.3 mmol), acridine **A1** (9 mg, 0.03 mmol, 10 mol%), Cu(hfac)<sub>2</sub> (14 mg, 0.03 mmol, 10 mol%), and DTBP (88 mg, 0.6 mmol, 2 equiv.) in trifluorotoluene (4.5 mL). The reaction mixture was degassed using a stream of argon bubbled through a glass pipet reaching the bottom of the test-tube, while vigorous stirring was maintained for 3 min. The test-tube was capped and the reaction mixture was irradiated with LED light ( $\lambda = 400$  nm) while stirring for 12 h. The reaction mixture was then diluted with ethyl acetate (10 mL), extracted with a saturated solution of EDTA (3 mL). The organic layer was collected, dried over anhydrous Na<sub>2</sub>SO<sub>4</sub>, concentrated under reduced pressure, and the remaining material was purified by flash chromatography on silica gel (hexane/ ethyl acetate 9 : 1 v/v) to give the amine product **33** (55 mg, 95%) as a yellow liquid.

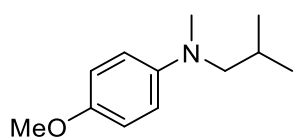

<sup>1</sup>H NMR (500 MHz, CDCl<sub>3</sub>): 6.85 (2 H, d,  $J = 8.9$  Hz), 6.69 (2 H, d,  $J = 8.9$  Hz), 3.78 (3 H, s), 3.02 (2 H, d,  $J = 7.3$  Hz), 2.91 (3 H, s), 2.03 (1 H, dp,  $J = 13.4, 6.3$  Hz), 0.94 (6 H, d,  $J = 6.8$  Hz) ppm. – <sup>13</sup>C NMR (125 MHz, CDCl<sub>3</sub>): 151.2, 145.1, 114.9, 113.8, 62.2, 56.0, 39.9, 27.5, 20.6 ppm. – IR: 3063, 2952, 2875, 2831, 1753, 1713, 1511, 1464, 1363, 1240, 1218, 1180, 1039, 978, 814, 700 cm<sup>-1</sup>. – HRMS: calcd for C<sub>12</sub>H<sub>20</sub>NO: 194.1539, found 194.1540 [M+H<sup>+</sup>].

### ***N*-(4-Iodobenzyl)-4-methoxy-*N*-methylaniline (34)**

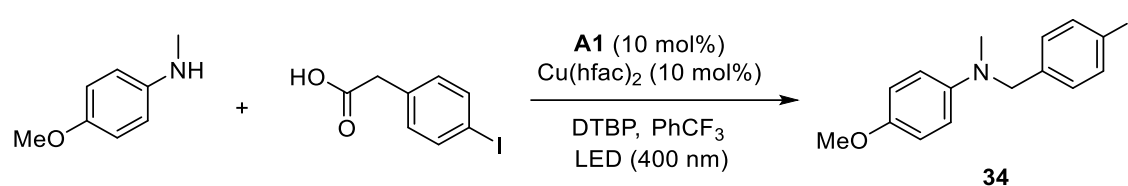

According to **GP2**, the reaction was carried out with 4-methoxy-*N*-methylaniline (103 mg, 0.75 mmol, 2.5 equiv.), 2-(4-iodophenyl)acetic acid (79 mg, 0.3 mmol), acridine **A1** (9 mg, 0.03 mmol, 10 mol%), Cu(hfac)<sub>2</sub> (14 mg, 0.03 mmol, 10 mol%), and DTBP (88 mg, 0.6 mmol, 2 equiv.) in trifluorotoluene (4.5 mL). The reaction mixture was degassed using a stream of argon bubbled through a glass pipet reaching the bottom of the test-tube, while vigorous stirring was maintained for 3 min. The test-tube was capped and the reaction mixture was irradiated with LED light ( $\lambda = 400$  nm) while stirring for 36 h. The reaction mixture was then diluted with ethyl acetate (10 mL), extracted with a saturated solution of EDTA (3 mL). The organic layer was collected, dried over anhydrous Na<sub>2</sub>SO<sub>4</sub>, concentrated under reduced pressure, and the remaining material was purified by flash chromatography on silica gel (hexane/ ethyl acetate 9 : 1 v/v) to give the amine product **34** (74 mg, 70%) as a brown liquid.

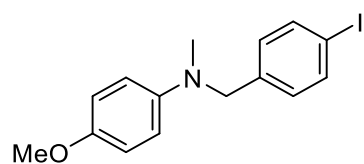

<sup>1</sup>H NMR (500 MHz, CDCl<sub>3</sub>): 7.64 (2 H, d,  $J = 8.1$  Hz), 7.01 (2 H, d,  $J = 8.0$  Hz), 6.83 (2 H, d,  $J = 9.0$  Hz), 6.72 (2 H, d,  $J = 9.1$  Hz), 4.36 (2 H, s), 3.77 (3 H, s), 2.91 (3 H, s) ppm. – <sup>13</sup>C NMR (125 MHz, CDCl<sub>3</sub>): 152.1, 144.6, 139.1, 137.6, 129.3, 114.9, 114.8, 92.1, 57.7, 55.9, 39.3 ppm. – IR: 3399, 2987, 2932, 2829, 1738, 1583, 1510, 1482, 1366, 1241, 1212, 1039, 1005, 950, 812, 716 cm<sup>-1</sup>. – HRMS: calcd for C<sub>15</sub>H<sub>16</sub>INO: 354.0349, found 354.0352 [M+H<sup>+</sup>].

### 4-Chloro-*N*-methyl-*N*-(3,3,3-trifluoropropyl)aniline (**35**)

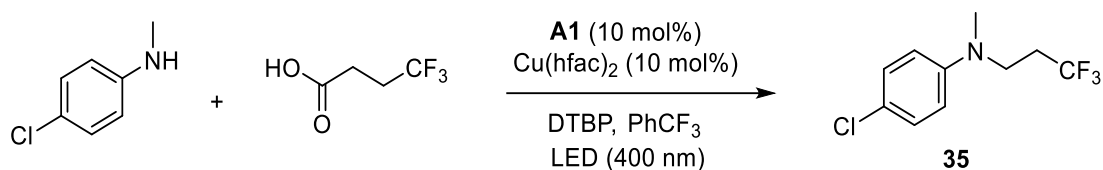

According to **GP2**, the reaction was carried out with 4-chloro-*N*-methylaniline (106 mg, 0.75 mmol, 2.5 equiv.), 4,4,4-trifluorobutanoic acid (43mg, 0.3 mmol), acridine **A1** (9 mg, 0.03 mmol, 10 mol%), Cu(hfac)<sub>2</sub> (14 mg, 0.03 mmol, 10 mol%), and DTBP (88 mg, 0.6 mmol, 2 equiv.) in trifluorotoluene (4.5 mL). The reaction mixture was degassed using a stream of argon bubbled through a glass pipet reaching the bottom of the test-tube, while vigorous stirring was maintained for 3 min. The test-tube was capped and the reaction mixture was irradiated with LED light ( $\lambda = 400$  nm) while stirring for 36 h. The reaction mixture was then diluted with ethyl acetate (10 mL), extracted with a saturated solution of EDTA (3 mL). The organic layer was collected, dried over anhydrous Na<sub>2</sub>SO<sub>4</sub>, concentrated under reduced pressure, and the remaining material was purified by flash chromatography on silica gel (hexane/ ethyl acetate 95 : 5 v/v) to give the amine product **35** (48mg, 67%) as a colorless liquid.

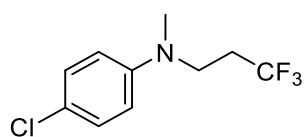

<sup>1</sup>H NMR (500 MHz, CDCl<sub>3</sub>): 7.20 (d, *J* = 9.0 Hz, 2H), 6.61 (d, *J* = 9.0 Hz, 2H), 4.05–3.19 (m, 2H), 2.93 (s, 3H), 2.52–2.20 (m, 2H) ppm. –

<sup>13</sup>C NMR (125 MHz, CDCl<sub>3</sub>): 146.8, 129.4, 126.5 (q, <sup>1</sup>*J*<sub>C-F</sub> = 276.9 Hz), 122.2, 113.6, 46.1 (q, <sup>3</sup>*J*<sub>C-F</sub> = 3.7 Hz), 38.6, 30.7 (q, <sup>2</sup>*J*<sub>C-F</sub> = 27.3 Hz) ppm. – <sup>19</sup>F NMR (471 MHz, CDCl<sub>3</sub>): –65.2 (t, *J* = 10.9 Hz) ppm. – IR: 3440, 2985, 2918, 2891, 2823, 1745, 1598, 1500, 1440, 1376, 1336, 1316, 1246, 1142, 1101, 1000, 954, 811 cm<sup>-1</sup>. – HRMS: calcd for C<sub>10</sub>H<sub>12</sub>ClF<sub>3</sub>N: 238.0605, found 238.0605 [M+H<sup>+</sup>].

### *N*-(4-Fluorophenethyl)-4-methoxy-*N*-methylaniline (**36**)

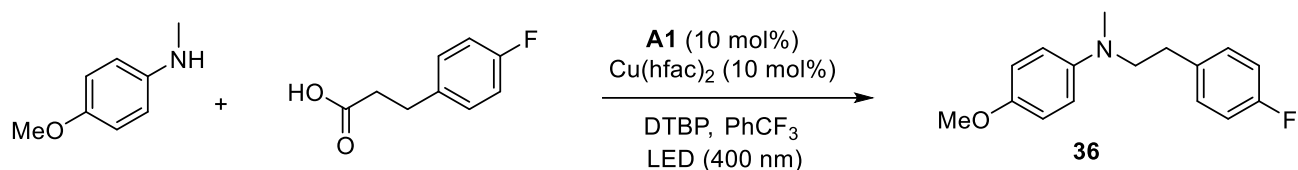

According to **GP2**, the reaction was carried out with 4-methoxy-*N*-methylaniline (103 mg, 0.75 mmol, 2.5 equiv.), 3-(4-fluorophenyl)propanoic acid (50 mg, 0.3 mmol), acridine **A1** (9 mg, 0.03 mmol, 10 mol%), Cu(hfac)<sub>2</sub> (14 mg, 0.03 mmol, 10 mol%), and DTBP (88 mg, 0.6 mmol, 2 equiv.) in trifluorotoluene (4.5 mL). The reaction mixture was degassed using a stream of argon bubbled through a glass pipet reaching the bottom of the test-tube, while vigorous stirring was maintained for 3 min. The test-tube was capped and the reaction mixture was irradiated with LED light ( $\lambda = 400$  nm) while stirring for 36 h. The reaction mixture was then diluted with ethyl acetate (10 mL), extracted with a saturated solution of EDTA (3 mL). The organic layer was collected, dried over anhydrous Na<sub>2</sub>SO<sub>4</sub>, concentrated under reduced pressure, and the remaining material was purified by flash chromatography on silica gel (hexane/ ethyl acetate 9 : 1 v/v) to give the amine product **36** (44 mg, 57%) as a dark yellow liquid.

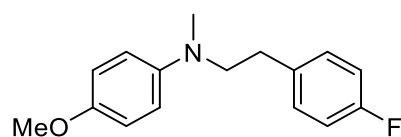

<sup>1</sup>H NMR (500 MHz, CDCl<sub>3</sub>): 7.15 (2 H, d,  $J = 8.3, 5.6$  Hz), 6.99 (2 H, t,  $J = 8.7$  Hz), 6.87 (2 H, d,  $J = 9.0$  Hz), 6.73 (2 H, d,  $J = 9.0$  Hz), 3.78 (3 H, s), 3.47 (2 H, dd,  $J = 8.9, 6.5$  Hz), 2.85 (3 H, s), 2.80 (2 H, dd,  $J = 8.8, 6.5$  Hz) ppm. – <sup>13</sup>C NMR (125 MHz, CDCl<sub>3</sub>): 161.6 (d,  $^1J_{C-F} = 243.7$  Hz), 151.8, 143.9, 135.8 (d,  $^4J_{C-F} = 3.8$  Hz), 130.3 (d,  $^3J_{C-F} = 7.6$  Hz), 115.4 (d,  $^2J_{C-F} = 21.4$  Hz), 115.0, 114.6, 56.1, 55.9, 39.3, 32.2 ppm. – <sup>19</sup>F NMR (471 MHz, CDCl<sub>3</sub>): –117.2 (ddd,  $J = 14.1, 8.8, 5.4$  Hz) ppm. – IR: 3061, 3001, 2934, 2875, 2841, 1737, 1701, 1600, 1508, 1464, 1256, 1243, 1220, 1181, 1157, 1037, 821 cm<sup>-1</sup>. – HRMS: calcd for C<sub>16</sub>H<sub>18</sub>FNO: 260.1445, found 260.1447 [M+H<sup>+</sup>].



### 4-Methoxy-*N*-(4-methoxyphenethyl)-*N*-methylaniline (37)

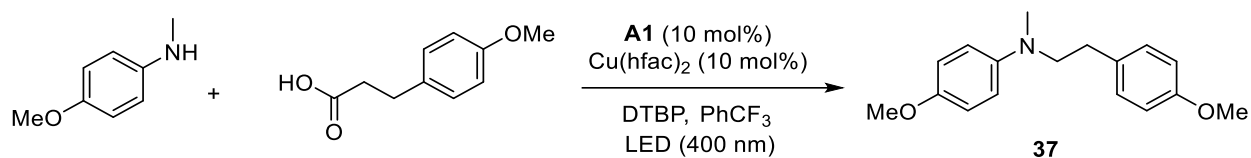

According to **GP2**, the reaction was carried out with 4-methoxy-*N*-methylaniline (103 mg, 0.75 mmol, 2.5 equiv.), 3-(4-methoxyphenyl)propanoic acid (54 mg, 0.3 mmol), acridine **A1** (9 mg, 0.03 mmol, 10 mol%), Cu(hfac)<sub>2</sub> (14 mg, 0.03 mmol, 10 mol%), and DTBP (88 mg, 0.6 mmol, 2 equiv.) in trifluorotoluene (4.5 mL). The reaction mixture was degassed using a stream of argon bubbled through a glass pipet reaching the bottom of the test-tube, while vigorous stirring was maintained for 3 min. The test-tube was capped and the reaction mixture was irradiated with LED light ( $\lambda = 400$  nm) while stirring for 36 h. The reaction mixture was then diluted with ethyl acetate (10 mL), extracted with a saturated solution of EDTA (3 mL). The organic layer was collected, dried over anhydrous Na<sub>2</sub>SO<sub>4</sub>, concentrated under reduced pressure, and the remaining material was purified by flash chromatography on silica gel (hexane/ ethyl acetate 9 : 1 v/v) to give the amine product **37** (75 mg, 92%) as a yellow liquid.

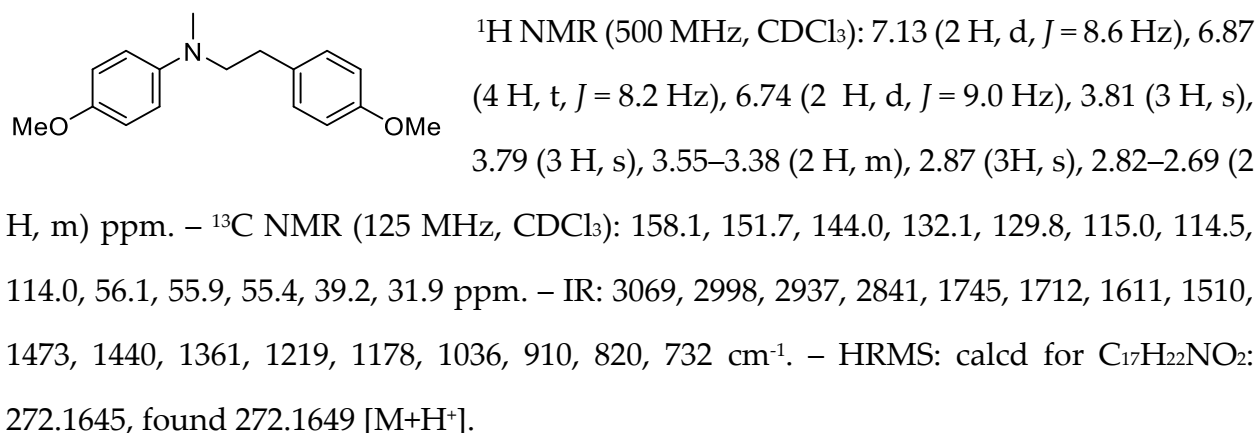

#### 4-Methyl-3,4-dihydro-2H-benzo[*b*][1,4]oxazine (38)<sup>[21]</sup>

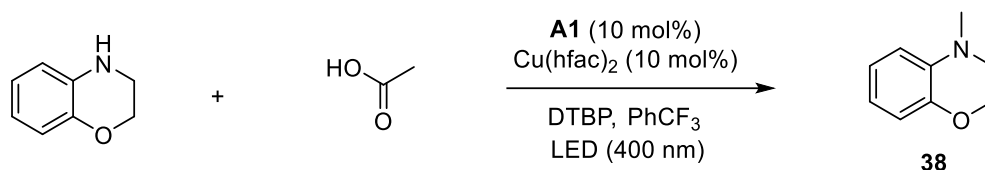

According to **GP1**, the reaction was carried out with 3,4-dihydro-2H-benzo[*b*][1,4]oxazine (41 mg, 0.3 mmol), acetic acid (90 mg, 1.5 mmol, 5.0 equiv.), acridine **A1** (9 mg, 0.03 mmol, 10 mol%), Cu(hfac)<sub>2</sub> (14 mg, 0.03 mmol, 10 mol%), and DTBP (88 mg, 0.6 mmol, 2 equiv.) in trifluorotoluene (3 mL). The reaction mixture was degassed using a stream of argon bubbled through a glass pipet reaching the bottom of the test-tube, while vigorous stirring was maintained for 3 min. The test-tube was capped and the reaction mixture was irradiated with LED light ( $\lambda = 400$  nm) while stirring for 24 h. The reaction mixture was then diluted with ethyl acetate (10 mL), extracted with a saturated solution of EDTA (3 mL). The organic layer was collected, dried over anhydrous Na<sub>2</sub>SO<sub>4</sub>, concentrated under reduced pressure, and the remaining material was purified by flash chromatography on silica gel (hexane/ ethyl acetate 9 : 1 v/v) to give the amine product **38** (28 mg, 62%) as a colorless liquid.

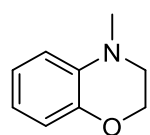

<sup>1</sup>H NMR (500 MHz, CDCl<sub>3</sub>): 6.84 (1 H, t, *J* = 7.6 Hz), 6.77 (1 H, d, *J* = 7.8 Hz), 6.73–6.61 (2 H, m), 4.36–4.26 (2 H, m), 3.34–3.19 (2 H, m), 2.88 (3 H, s) ppm. –

<sup>13</sup>C NMR (125 MHz, CDCl<sub>3</sub>): 144.4, 136.7, 121.6, 118.4, 116.0, 112.7, 65.0, 49.4,

38.9 ppm. – IR: 2873, 2816, 1682, 1606, 1502, 1476, 1457, 1332, 1307, 1255, 1224, 1208, 1128, 1056 cm<sup>-1</sup>.

### 1-Cyclohexylindoline (39)<sup>[22]</sup>

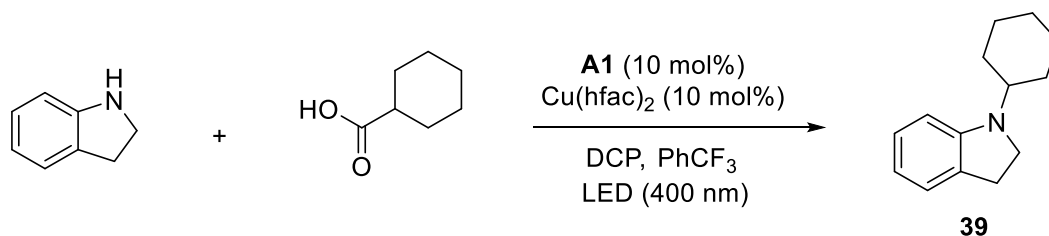

According to **GP2**, the reaction was carried out with indoline (89 mg, 0.75 mmol, 2.5 equiv.), cyclohexanecarboxylic acid (38 mg, 0.3 mmol), acridine **A1** (9 mg, 0.03 mmol, 10 mol%),  $\text{Cu}(\text{hfac})_2$  (14 mg, 0.03 mmol, 10 mol%), and DCP (120 mg, 0.45 mmol, 1.5 equiv.) in ethyl acetate (3 mL). The reaction mixture was degassed using a stream of argon bubbled through a glass pipet reaching the bottom of the test-tube, while vigorous stirring was maintained for 3 min. The test-tube was capped and the reaction mixture was irradiated with LED light ( $\lambda = 400$  nm) while stirring for 12 h. The reaction mixture was then extracted with concentrated HCl (2 x 10 mL), neutralized the aqueous phase with solid sodium carbonate, and back extracted with ethyl acetate (3x 15 mL). The organic layer was collected, dried over anhydrous  $\text{Na}_2\text{SO}_4$ , concentrated under reduced pressure, and the remaining material was purified by flash chromatography on silica gel (hexane/ ethyl acetate 95 : 5 v/v) to give the amine product **39** (51 mg, 85%) as a dark yellow liquid.

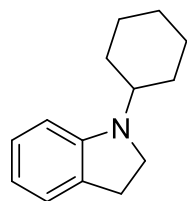

$^1\text{H}$  NMR (500 MHz,  $\text{CDCl}_3$ ): 7.10 – 7.04 (2 H, m), 6.60 (1 H, t,  $J = 7.3$  Hz), 6.43 (1 H, d,  $J = 7.8$  Hz), 3.44 – 3.29 (3 H, m), 2.96 (2 H, t,  $J = 8.4$  Hz), 1.91 – 1.83 (4 H, m), 1.80 – 1.67 (1 H, m), 1.45 – 1.32 (4 H, m), 1.23 – 1.09 (1 H, m) ppm. –  $^{13}\text{C}$  NMR (125 MHz,  $\text{CDCl}_3$ ): 151.3, 130.2, 127.3, 124.5, 116.7, 106.9,

54.7, 46.8, 28.8, 28.4, 26.2, 26.1 ppm. – IR: 3350, 3049, 2930, 2854, 1709, 1651, 1609, 1578, 1508, 1478, 1460, 1311, 1264, 1211, 1184, 1019, 892, 736, 702  $\text{cm}^{-1}$ .

#### 4-Cyclohexyl-3,4-dihydro-2H-benzo[b][1,4]oxazine (40)

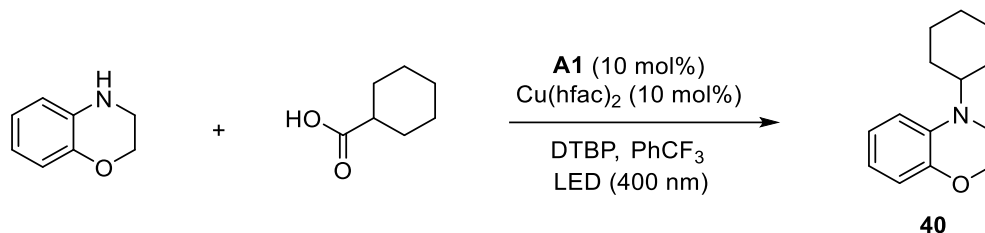

According to **GP2**, the reaction was carried out with 3,4-dihydro-2H-benzo[b][1,4]oxazine (101 mg, 0.75 mmol, 2.5 equiv.), cyclohexanecarboxylic acid (38 mg, 0.3 mmol), acridine **A1** (9 mg, 0.03 mmol, 10 mol%),  $\text{Cu}(\text{hfac})_2$  (14 mg, 0.03 mmol, 10 mol%), and DTBP (88 mg, 0.6 mmol, 2 equiv.) in trifluorotoluene (4.5 mL). The reaction mixture was degassed using a stream of argon bubbled through a glass pipet reaching the bottom of the test-tube, while vigorous stirring was maintained for 3 min. The test-tube was capped and the reaction mixture was irradiated with LED light ( $\lambda = 400$  nm) while stirring for 36 h. The reaction mixture was then diluted with ethyl acetate (10 mL), extracted with a saturated solution of EDTA (3 mL). The organic layer was collected, dried over anhydrous  $\text{Na}_2\text{SO}_4$ , concentrated under reduced pressure, and the remaining material was purified by flash chromatography on silica gel (hexane/ ethyl acetate 5 : 95 v/v) to give the amine product **40** (56 mg, 86%) as a dark yellow liquid.

$^1\text{H}$  NMR (500 MHz,  $\text{CDCl}_3$ ): 6.84 (1 H, td,  $J = 8.0, 7.5, 1.5$  Hz), 6.80 (1 H, dd,  $J = 7.9, 1.5$  Hz), 6.75 (1 H, d,  $J = 8.0$  Hz), 6.60 (1 H, td,  $J = 7.8, 1.4$  Hz), 4.26–4.14 (2 H, m), 3.58 (1 H, ddt,  $J = 11.1, 6.9, 3.4$  Hz), 3.40–3.19 (2 H, m), 2.00–1.81 (4 H, m), 1.73 (1 H, d,  $J = 13.0$  Hz), 1.42 (4 H, quint.,  $J = 10.8, 9.6$  Hz), 1.22–1.09 (1 H, m) ppm. –  $^{13}\text{C}$  NMR (125 MHz,  $\text{CDCl}_3$ ): 144.4, 135.1, 121.6, 116.9, 116.6, 112.1, 65.2, 55.9, 40.2, 29.2, 26.2, 26.1 ppm. – IR: 3074, 3054, 2995, 2943, 1614, 1502, 1458, 1431, 1264, 1212, 895, 734, 704  $\text{cm}^{-1}$ . – HRMS: calcd for  $\text{C}_{14}\text{H}_{20}\text{NO}$ : 218.1539, found 218.1542 [ $\text{M}+\text{H}^+$ ].

#### 4-Methyl-N-(4-phenylbutyl)-N-(*p*-tolyl)aniline (**41**)

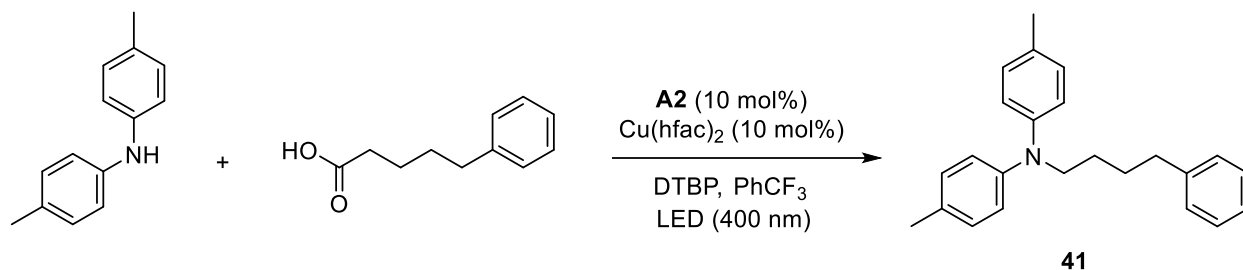

According to **GP1**, the reaction was carried out with di-*p*-tolylamine (59 mg, 0.3 mmol) 5-phenylpentanoic acid (133.5 mg, 0.75 mmol, 2.5 equiv.), acridine **A2** (9 mg, 0.03 mmol, 10 mol%), Cu(hfac)<sub>2</sub> (14 mg, 0.03 mmol, 10 mol%), and DTBP (88 mg, 0.6 mmol, 2 equiv.) in trifluorotoluene (3 mL). The reaction mixture was degassed using a stream of argon bubbled through a glass pipet reaching the bottom of the test-tube, while vigorous stirring was maintained for 3 min. The test-tube was capped and the reaction mixture was irradiated with LED light ( $\lambda = 400$  nm) while stirring for 24 h. The reaction mixture was then diluted with ethyl acetate (10 mL), extracted with a saturated solution of EDTA (3 mL). The organic layer was collected, dried over anhydrous Na<sub>2</sub>SO<sub>4</sub>, concentrated under reduced pressure, and the remaining material was purified by flash chromatography on silica gel (hexane/ ethyl acetate 95 : 5 v/v) to give the amine product **41** (71 mg, 72%) as a colorless liquid.

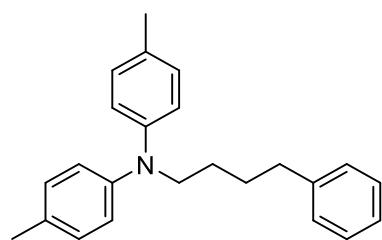

<sup>1</sup>H NMR (500 MHz, CDCl<sub>3</sub>): 7.36–7.24 (2 H, m), 7.26–7.13 (3 H, m), 7.08 (4 H, d,  $J = 8.2$  Hz), 6.88 (4 H, d,  $J = 8.5$  Hz), 3.68 (2 H, t,  $J = 7.0$  Hz), 2.64 (2 H, t,  $J = 7.1$  Hz), 2.33 (6 H, s), 1.85–1.58 (4 H, m) ppm. – <sup>13</sup>C NMR (125 MHz, CDCl<sub>3</sub>): 146.1, 142.5, 130.4, 129.9, 128.5, 128.4, 125.8, 121.0, 52.4, 35.8, 29.1, 27.3, 20.8 ppm. – IR: 3023, 2919, 2856, 1607, 1568, 1508, 1452, 1364, 1285, 1245, 1161, 1110, 1029 cm<sup>-1</sup>. – HRMS: calcd for C<sub>24</sub>H<sub>28</sub>N: 330.2216, found 330.2214 [M+H<sup>+</sup>].

### Methyl 5-(di-*p*-tolylamino)pentanoate (**42**)

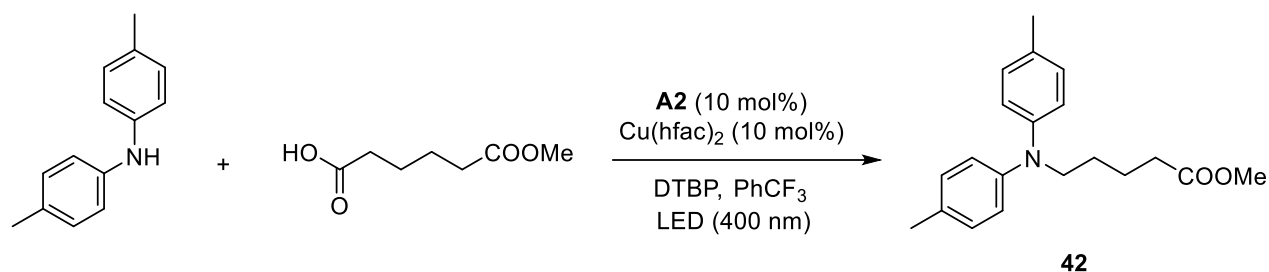

According to **GP1**, the reaction was carried out with di-*p*-tolylamine (59 mg, 0.3 mmol) 6-methoxy-6-oxohexanoic acid (120 mg, 0.75 mmol, 2.5 equiv.), acridine **A2** (9 mg, 0.03 mmol, 10 mol%), Cu(hfac)<sub>2</sub> (14 mg, 0.03 mmol, 10 mol%), and DTBP (88 mg, 0.6 mmol, 2 equiv.) in trifluorotoluene (3 mL). The reaction mixture was degassed using a stream of argon bubbled through a glass pipet reaching the bottom of the test-tube, while vigorous stirring was maintained for 3 min. The test-tube was capped and the reaction mixture was irradiated with LED light ( $\lambda = 400$  nm) while stirring for 24 h. The reaction mixture was then diluted with ethyl acetate (10 mL), extracted with a saturated solution of EDTA (3 mL). The organic layer was collected, dried over anhydrous Na<sub>2</sub>SO<sub>4</sub>, concentrated under reduced pressure, and the remaining material was purified by flash chromatography on silica gel (hexane/ ethyl acetate 95 : 5 v/v) to give the amine product **42** (69 mg, 74%) as a colorless liquid.

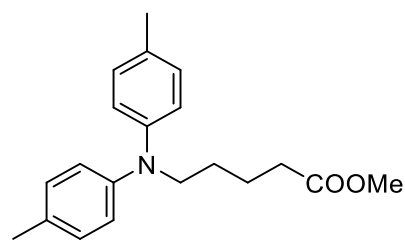

<sup>1</sup>H NMR (500 MHz, CDCl<sub>3</sub>): 7.08 (4 H, d,  $J = 8.2$  Hz), 6.98–6.80 (4 H, m), 3.68 (5 H, s), 2.35 (2 H, t,  $J = 6.1$  Hz), 2.32 (6 H, s), 1.75–1.65 (4 H, m) ppm. – <sup>13</sup>C NMR (125 MHz, CDCl<sub>3</sub>): 174.0, 146.0, 130.5, 129.9, 121.0, 120.9, 52.1, 51.6, 34.0, 27.2, 22.6, 20.7 ppm. – IR: 3023, 2918, 2859, 1736, 1608, 1568, 1507, 1436, 1364, 1317, 1289, 1245, 1160, 1094, 1017 cm<sup>-1</sup>. – HRMS: calcd for C<sub>20</sub>H<sub>26</sub>NO<sub>2</sub>: 312.1958, found 312.1956 [M+H<sup>+</sup>].

**4-(*tert*-Butyl)-*N*-(4-(*tert*-butyl)phenyl)-*N*-(3,4-dimethoxyphenethyl)aniline (43)**

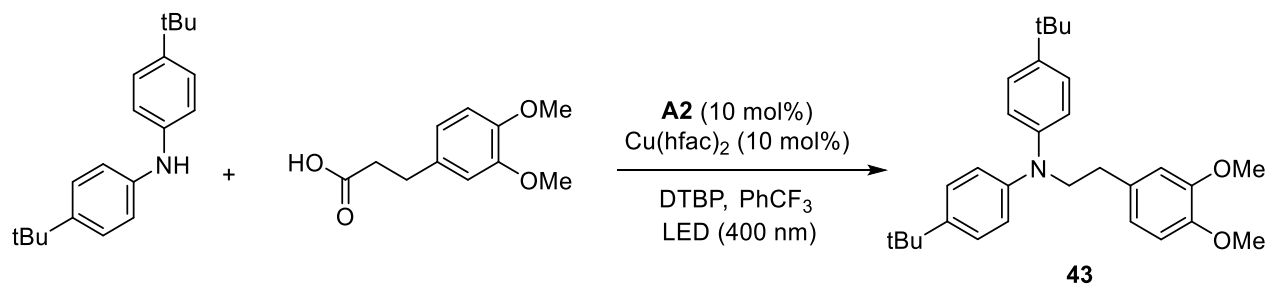

According to **GP1**, the reaction was carried out with bis(4-(*tert*-butyl)phenyl)amine (84 mg, 0.3 mmol), 3-(3,4-dimethoxyphenyl)propanoic acid (158 mg, 0.75 mmol, 2.5 equiv.), acridine **A2** (9 mg, 0.03 mmol, 10 mol%), Cu(hfac)<sub>2</sub> (14 mg, 0.03 mmol, 10 mol%), and DTBP (88 mg, 0.6 mmol, 2 equiv.) in trifluorotoluene (3 mL). The reaction mixture was degassed using a stream of argon bubbled through a glass pipet reaching the bottom of the test-tube, while vigorous stirring was maintained for 3 min. The test-tube was capped and the reaction mixture was irradiated with LED light ( $\lambda = 400 \text{ nm}$ ) while stirring for 24 h. The reaction mixture was then diluted with ethyl acetate (10 mL), extracted with a saturated solution of EDTA (3 mL). The organic layer was collected, dried over anhydrous Na<sub>2</sub>SO<sub>4</sub>, concentrated under reduced pressure, and the remaining material was purified by flash chromatography on silica gel (hexane/ ethyl acetate 9 : 1 v/v) to give the amine product **43** (92 mg, 69%) as a colorless solid.

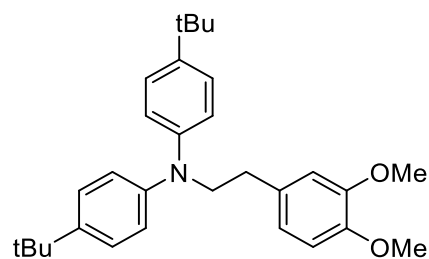

m.p.: 93–95 °C. – <sup>1</sup>H NMR (500 MHz, CDCl<sub>3</sub>): 7.28 (4 H, d,  $J = 8.7 \text{ Hz}$ ), 6.91 (4 H, d,  $J = 8.8 \text{ Hz}$ ), 6.81 (1 H, d,  $J = 8.1 \text{ Hz}$ ), 6.76 (1 H, d,  $J = 8.0 \text{ Hz}$ ), 6.69 (1 H, s), 3.89 (2 H, q,  $J = 7.6 \text{ Hz}$ ), 3.87 (3 H, s), 3.84 (3 H, s), 2.91 (2 H, t,  $J = 7.8 \text{ Hz}$ ), 1.32 (18 H, s) ppm. – <sup>13</sup>C NMR (125 MHz, CDCl<sub>3</sub>): 149.0, 147.6, 145.4, 144.0, 132.2, 126.2, 120.8, 120.5, 112.3, 111.5, 56.1, 56.0, 54.2, 34.3, 33.5, 31.6 ppm. – IR: 2958, 2864, 1606, 1510, 1462, 1417, 1392, 1363, 1282, 1234, 1176, 1156, 1138, 1071, 1029 cm<sup>-1</sup>. – HRMS: calcd for C<sub>30</sub>H<sub>40</sub>NO<sub>2</sub>: 446.3054, found 446.3049 [M+H<sup>+</sup>].

### *N*-(3-(1*H*-Indol-3-yl)propyl)-4-methoxy-*N*-(4-methoxyphenyl)aniline (**44**)

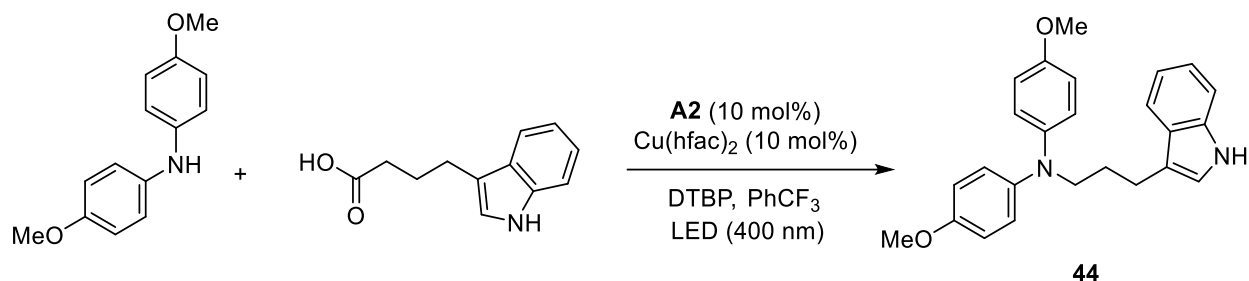

According to **GP1**, the reaction was carried out with bis(4-methoxyphenyl)amine (69 mg, 0.3 mmol), 4-(1*H*-indol-3-yl)butanoic acid (152 mg, 0.75 mmol, 2.5 equiv.), acridine **A2** (9 mg, 0.03 mmol, 10 mol%), Cu(hfac)<sub>2</sub> (14 mg, 0.03 mmol, 10 mol%), and DTBP (88 mg, 0.6 mmol, 2 equiv.) in trifluorotoluene (3 mL). The reaction mixture was degassed using a stream of argon bubbled through a glass pipet reaching the bottom of the test-tube, while vigorous stirring was maintained for 3 min. The test-tube was capped and the reaction mixture was irradiated with LED light ( $\lambda = 400$  nm) while stirring for 24 h. The reaction mixture was then diluted with ethyl acetate (10 mL), extracted with a saturated solution of EDTA (3 mL). The organic layer was collected, dried over anhydrous Na<sub>2</sub>SO<sub>4</sub>, concentrated under reduced pressure, and the remaining material was purified by flash chromatography on silica gel (hexane/ ethyl acetate 4 : 1 v/v) to give the amine product **44** (59 mg, 51%) as a brown liquid.

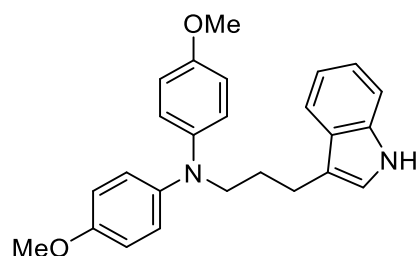

<sup>1</sup>H NMR (500 MHz, CDCl<sub>3</sub>): 7.91 (1 H, s), 7.56 (1 H, d, *J* = 7.9 Hz), 7.36 (1 H, s), 7.20 (1 H, t, *J* = 7.5 Hz), 7.12 (1 H, t, *J* = 7.5 Hz), 6.89 (4 H, d, *J* = 9.0 Hz), 6.82 (4 H, d, *J* = 8.9 Hz), 3.79 (6 H, s), 3.69 (2 H, t, *J* = 7.5 Hz), 2.84 (2 H, t, *J* = 7.6 Hz), 2.07 (2 H, quint., *J* = 7.6 Hz) ppm. – <sup>13</sup>C NMR (125 MHz, CDCl<sub>3</sub>): 154.3, 142.7, 136.5, 127.6, 122.3, 122.0, 121.3, 119.3, 119.0, 116.1, 114.8, 111.2, 55.7, 52.6, 27.9, 22.7 ppm. – IR: 3410,



3038, 2930, 2831, 1616, 1501, 1455, 1440, 1418, 1337, 1237, 1177, 1080, 1033  $\text{cm}^{-1}$ . – HRMS: calcd for  $\text{C}_{25}\text{H}_{27}\text{N}_2\text{O}_2$ : 387.2067, found 387.2066  $[\text{M}+\text{H}^+]$ .

**4-(2-Phenylpropan-2-yl)-N-(4-(2-phenylpropan-2-yl)phenyl)-N-(3,3,3-trifluoropropyl)aniline (45)**

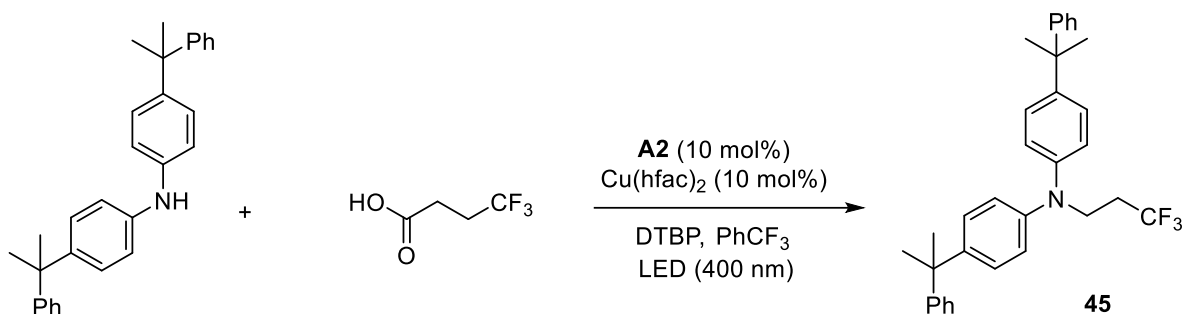

According to **GP1**, the reaction was carried out with bis(4-(2-phenylpropan-2-yl)phenyl)amine (121 mg, 0.3 mmol), 4,4,4-trifluorobutanoic acid (107 mg, 0.75 mmol, 2.5 equiv.), acridine **A2** (9 mg, 0.03 mmol, 10 mol%),  $\text{Cu}(\text{hfac})_2$  (14 mg, 0.03 mmol, 10 mol%), and DTBP (88 mg, 0.6 mmol, 2 equiv.) in trifluorotoluene (3 mL). The reaction mixture was degassed using a stream of argon bubbled through a glass pipet reaching the bottom of the test-tube, while vigorous stirring was maintained for 3 min. The test-tube was capped and the reaction mixture was irradiated with LED light ( $\lambda = 400 \text{ nm}$ ) while stirring for 24 h. The reaction mixture was then diluted with ethyl acetate (10 mL), extracted with a saturated solution of EDTA (3 mL). The organic layer was collected, dried over anhydrous  $\text{Na}_2\text{SO}_4$ , concentrated under reduced pressure, and the remaining material was purified by flash chromatography on silica gel (hexane/ ethyl acetate 95 : 5 v/v) to give the amine product **45** (77 mg, 51%) as a colorless liquid.

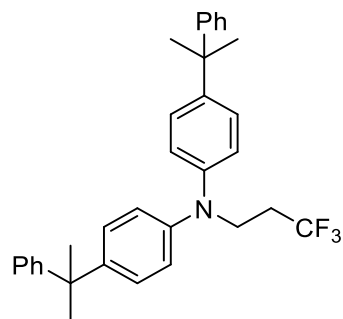

$^1\text{H}$  NMR (500 MHz,  $\text{CDCl}_3$ ): 7.35–7.29 (8 H, m), 7.24–7.15 (6 H, m), 6.98–6.87 (4 H, m), 4.09–3.88 (2 H, m), 2.65–2.33 (2 H, m), 1.71 (12 H, s) ppm. –  $^{13}\text{C}$  NMR (125 MHz,  $\text{CDCl}_3$ ): 150.8, 144.8, 144.3, 128.1, 127.9, 126.9, 125.7, 124.3 (d,  $^1J_{\text{C-F}} = 277.4$  Hz), 120.3, 45.3 (q,  $^3J_{\text{C-F}} = 4.1$  Hz), 42.5, 31.9 (q,  $^2J_{\text{C-F}} = 27.0$  Hz), 30.9 ppm. –  $^{19}\text{F}$  NMR (471 MHz,  $\text{CDCl}_3$ ): –65.1 (td,  $J = 10.8, 3.3$  Hz) ppm. –

IR: 3029, 2966, 1602, 1507, 1494, 1464, 1445, 1384, 1334, 1289, 1234, 1200, 1145, 1089, 1029, 1003  $\text{cm}^{-1}$ . – HRMS: calcd for  $\text{C}_{33}\text{H}_{35}\text{F}_3\text{N}$ : 502.2716, found 502.2716 [ $\text{M}+\text{H}^+$ ].

### *N,N*-Di-*p*-tolyltetrahydro-2*H*-pyran-4-amine (**46**)

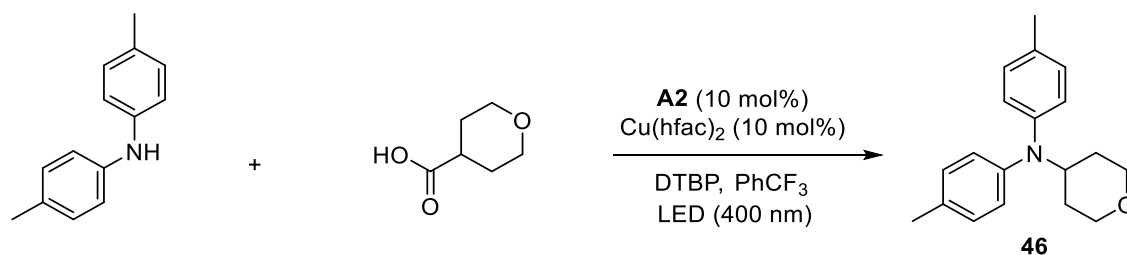

According to **GP1**, the reaction was carried out with di-*p*-tolylamine (59 mg, 0.3 mmol), tetrahydro-2*H*-pyran-4-carboxylic acid (98 mg, 0.75 mmol, 2.5 equiv.), acridine **A2** (9 mg, 0.03 mmol, 10 mol%),  $\text{Cu}(\text{hfac})_2$  (14 mg, 0.03 mmol, 10 mol%), and DTBP (88 mg, 0.6 mmol, 2 equiv.) in trifluorotoluene (3 mL). The reaction mixture was degassed using a stream of argon bubbled through a glass pipet reaching the bottom of the test-tube, while vigorous stirring was maintained for 3 min. The test-tube was capped and the reaction mixture was irradiated with LED light ( $\lambda = 400$  nm) while stirring for 24 h. The reaction mixture was then diluted with ethyl acetate (10 mL), extracted with a saturated solution of EDTA (3 mL). The organic layer was collected, dried over anhydrous  $\text{Na}_2\text{SO}_4$ , concentrated under reduced pressure, and the remaining material was purified by flash chromatography on silica gel (hexane/ ethyl acetate 4 : 1 v/v) to give the amine product **46** (57 mg, 68%) as a colorless liquid.

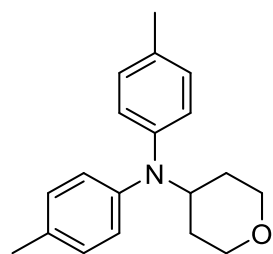

$^1\text{H}$  NMR (500 MHz,  $\text{CDCl}_3$ ): 7.08 (4 H, d,  $J = 7.9$  Hz), 6.75 (4 H, d,  $J = 8.8$  Hz), 4.02 (3 H, dd,  $J = 16.7, 8.4$  Hz), 3.52 (2 H, t,  $J = 11.9$  Hz), 2.31 (6 H, s), 1.90 (2 H, d,  $J = 12.6$  Hz), 1.57 (2 H, ddq,  $J = 24.7, 12.4, 8.1, 6.4$  Hz) ppm. –  $^{13}\text{C}$  NMR (125 MHz,  $\text{CDCl}_3$ ): 143.9, 131.4, 129.9, 122.8, 67.9, 54.2, 31.9, 20.8 ppm. – IR: 3023, 2950, 2920, 2837, 1737, 1617, 1568, 1505, 1446, 1381, 1305, 1278, 1250, 1233, 1145, 1128, 1105, 1083  $\text{cm}^{-1}$ . – HRMS: calcd for  $\text{C}_{19}\text{H}_{24}\text{NO}$ : 282.1852, found 282.1856  $[\text{M}+\text{H}^+]$ .

#### 4-Methoxy-*N*-(4-methoxyphenyl)-*N*-methylaniline (**47**)<sup>[23]</sup>

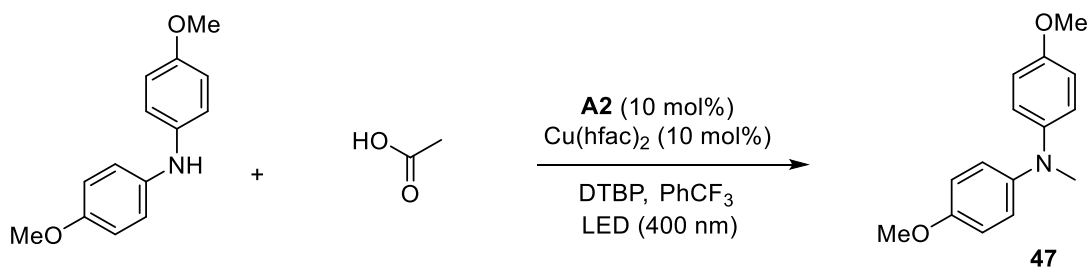

According to **GP1**, the reaction was carried out with bis(4-methoxyphenyl)amine (69 mg, 0.3 mmol), acetic acid (90 mg, 1.5 mmol, 5.0 equiv.), acridine **A2** (9 mg, 0.03 mmol, 10 mol%),  $\text{Cu}(\text{hfac})_2$  (14 mg, 0.03 mmol, 10 mol%), and DTBP (88 mg, 0.6 mmol, 2 equiv.) in trifluorotoluene (3 mL). The reaction mixture was degassed using a stream of argon bubbled through a glass pipet reaching the bottom of the test-tube, while vigorous stirring was maintained for 3 min. The test-tube was capped and the reaction mixture was irradiated with LED light ( $\lambda = 400$  nm) while stirring for 24 h. The reaction mixture was then diluted with ethyl acetate (10 mL), extracted with a saturated solution of EDTA (3 mL). The organic layer was collected, dried over anhydrous  $\text{Na}_2\text{SO}_4$ , concentrated under reduced pressure, and the remaining material was purified by flash chromatography on silica gel (hexane/ ethyl acetate 9 : 1 v/v) to give the amine product **47** (49 mg, 67%) as a colorless liquid.

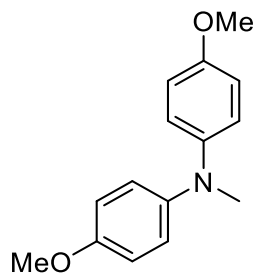

m.p.: 102–104 °C.  $^1\text{H}$  NMR (500 MHz,  $\text{CDCl}_3$ ): 6.91 (4 H, d,  $J = 8.9$  Hz), 6.83 (4 H, d,  $J = 8.9$  Hz), 3.78 (6 H, s), 3.21 (3 H, s) ppm.  $^{13}\text{C}$  NMR (125 MHz,  $\text{CDCl}_3$ ): 154.5, 143.8, 121.7, 114.7, 55.8, 41.2 ppm. – IR: 3014, 2950, 2909, 1834, 1880, 1609, 1509, 1457, 1442, 1336, 1283, 1241, 1180, 1135, 1123, 1108, 1029  $\text{cm}^{-1}$ .

### *N,N*-Diethyl-4-methoxyaniline (**48**)<sup>[19]</sup>

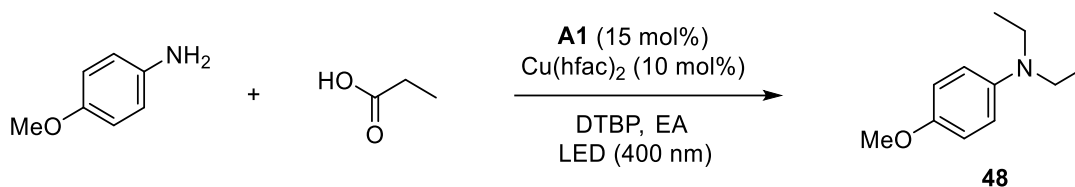

According to **GP1**, the reaction was carried out with 4-methoxyaniline (37 mg, 0.3 mmol), propionic acid (111 mg, 1.5 mmol, 5 equiv.), acridine **A1** (13 mg, 0.045 mmol, 15 mol%),  $\text{Cu}(\text{hfac})_2$  (14 mg, 0.03 mmol, 10 mol%), and DTBP (88 mg, 0.6 mmol, 2 equiv.) in ethyl acetate (1.5 mL). The reaction mixture was degassed using a stream of argon bubbled through a glass pipet reaching the bottom of the test-tube, while vigorous stirring was maintained for 3 min. The test-tube was capped and the reaction mixture was irradiated with LED light ( $\lambda = 400$  nm) while stirring for 36 h. The reaction mixture was then diluted with ethyl acetate (10 mL), extracted with a saturated solution of EDTA (3 mL). The organic layer was collected, dried over anhydrous  $\text{Na}_2\text{SO}_4$ , concentrated under reduced pressure, and the remaining material was purified by flash chromatography on silica gel (hexane/ ethyl acetate 95 : 5 v/v) to give the amine product **48** (26 mg, 48%) as a yellow liquid.

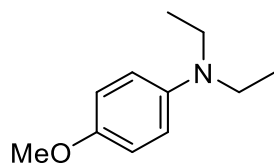

$^1\text{H}$  NMR (500 MHz,  $\text{CDCl}_3$ ): 6.84 (2 H, d,  $J = 8.9$  Hz), 6.72 (2 H, d,  $J = 8.5$  Hz), 3.77 (3 H, s), 3.27 (4 H, q,  $J = 6.9$  Hz), 1.11 (6 H, t,  $J = 7.0$  Hz) ppm.  $^{13}\text{C}$  NMR (125 MHz,  $\text{CDCl}_3$ ): 151.6, 143.0, 115.4, 114.9, 55.9,

45.3, 12.6 ppm. – IR: 3058, 2968, 2938, 2878, 2833, 1512, 1464, 1372, 1242, 1181, 1040, 813 cm<sup>-1</sup>.

***N,N*-Diethyl-3-methoxyaniline (49)<sup>[24]</sup>**

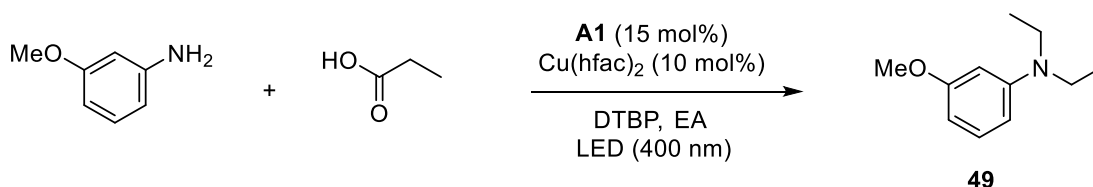

According to **GP1**, the reaction was carried out with 3-methoxyaniline (37 mg, 0.3 mmol), propionic acid (111 mg, 1.5 mmol, 5 equiv.), acridine **A1** (13 mg, 0.045 mmol, 15 mol%),  $\text{Cu}(\text{hfac})_2$  (14 mg, 0.03 mmol, 10 mol%), and DTBP (88 mg, 0.6 mmol, 2 equiv.) in ethyl acetate (1.5 mL). The reaction mixture was degassed using a stream of argon bubbled through a glass pipet reaching the bottom of the test-tube, while vigorous stirring was maintained for 3 min. The test-tube was capped and the reaction mixture was irradiated with LED light ( $\lambda = 400$  nm) while stirring for 36 h. The reaction mixture was then diluted with ethyl acetate (10 mL), extracted with a saturated solution of EDTA (3 mL). The organic layer was collected, dried over anhydrous  $\text{Na}_2\text{SO}_4$ , concentrated under reduced pressure, and the remaining material was purified by flash chromatography on silica gel (hexane/ ethyl acetate 95 : 5 v/v) to give the amine product **49** (32 mg, 60%) as a colorless liquid.

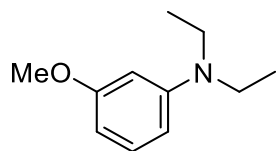

<sup>1</sup>H NMR (500 MHz,  $\text{CDCl}_3$ ): 7.12 (1 H, t,  $J = 8.5$  Hz), 6.32 (1 H, d,  $J = 9.8$  Hz), 6.23 (2 H, dd,  $J = 5.0, 2.6$  Hz), 3.79 (3 H, s), 3.34 (4 H, q,  $J = 7.1$  Hz), 1.16 (6 H, t,  $J = 7.1$  Hz) ppm. – <sup>13</sup>C NMR (125 MHz,  $\text{CDCl}_3$ ): 161.1, 149.3, 130.0, 105.2, 100.1, 98.5, 55.2, 44.6, 12.8 ppm. – IR: 2967, 2930, 2899, 2885, 2832, 1608, 1572, 1498, 1485, 1455, 1392, 1356, 1327, 1220, 1139, 1055, 1019, 824, 746, 687 cm<sup>-1</sup>.

### *N,N*-Diethyl-4-methylaniline (**50**)<sup>[25]</sup>

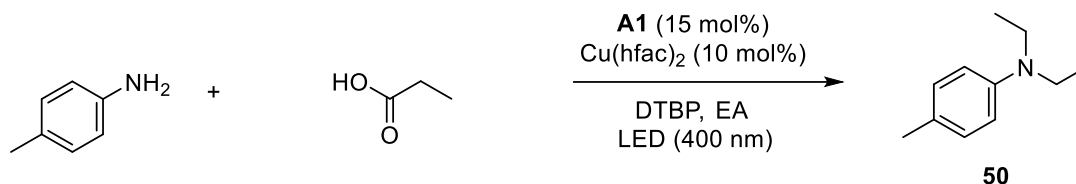

According to **GP1**, the reaction was carried out with 4-methylaniline (32 mg, 0.3 mmol), propionic acid (111 mg, 1.5 mmol, 5 equiv.), acridine **A1** (13 mg, 0.045 mmol, 15 mol%),  $\text{Cu}(\text{hfac})_2$  (14 mg, 0.03 mmol, 10 mol%), and DTBP (88 mg, 0.6 mmol, 2 equiv.) in ethyl acetate (1.5 mL). The reaction mixture was degassed using a stream of argon bubbled through a glass pipet reaching the bottom of the test-tube, while vigorous stirring was maintained for 3 min. The test-tube was capped and the reaction mixture was irradiated with LED light ( $\lambda = 400$  nm) while stirring for 36 h. The reaction mixture was then diluted with ethyl acetate (10 mL), extracted with a saturated solution of EDTA (3 mL). The organic layer was collected, dried over anhydrous  $\text{Na}_2\text{SO}_4$ , concentrated under reduced pressure, and the remaining material was purified by flash chromatography on silica gel (hexane/ ethyl acetate 98 : 2 v/v) to give the amine product **50** (32 mg, 65%) as a colorless liquid.

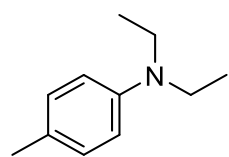

$^1\text{H}$  NMR (500 MHz,  $\text{CDCl}_3$ ): 7.03 (2 H, d,  $J = 8.5$  Hz), 6.63 (2 H, d,  $J = 8.5$  Hz), 3.32 (4 H, q,  $J = 7.0$  Hz), 2.24 (3 H, s), 1.14 (6 H, t,  $J = 7.0$  Hz) ppm. –

$^{13}\text{C}$  NMR (125 MHz,  $\text{CDCl}_3$ ): 146.0, 129.9, 124.9, 112.7, 44.7, 20.3, 12.7

ppm. – IR: 3055, 2968, 2928, 2857, 1735, 1617, 1580, 1519, 1484, 1455, 1374, 1264, 1194, 803, 737, 704  $\text{cm}^{-1}$ .

### *N,N*-Diethyl-3,4-dimethylaniline (**51**)<sup>[26]</sup>

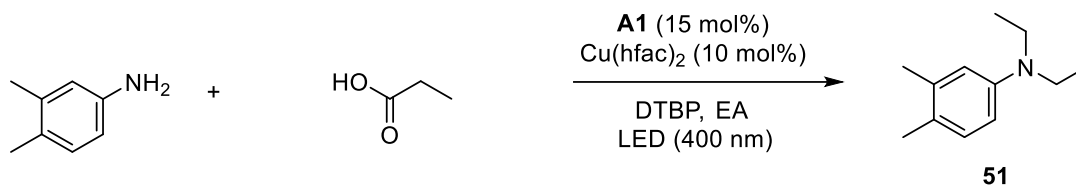

According to **GP1**, the reaction was carried out with 3,4-dimethylaniline (36 mg, 0.3 mmol), propionic acid (111 mg, 1.5 mmol, 5 equiv.), acridine **A1** (13 mg, 0.045 mmol, 15 mol%),  $\text{Cu}(\text{hfac})_2$  (14 mg, 0.03 mmol, 10 mol%), and DTBP (88 mg, 0.6 mmol, 2 equiv.) in ethyl acetate (1.5 mL). The reaction mixture was degassed using a stream of argon bubbled through a glass pipet reaching the bottom of the test-tube, while vigorous stirring was maintained for 3 min. The test-tube was capped and the reaction mixture was irradiated with LED light ( $\lambda = 400 \text{ nm}$ ) while stirring for 36 h. The reaction mixture was then diluted with ethyl acetate (10 mL), extracted with a saturated solution of EDTA (3 mL). The organic layer was collected, dried over anhydrous  $\text{Na}_2\text{SO}_4$ , concentrated under reduced pressure, and the remaining material was purified by flash chromatography on silica gel (hexane/ ethyl acetate 98 : 2 v/v) to give the amine product **51** (31 mg, 58%) as a colorless liquid.

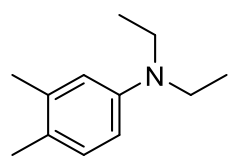

$^1\text{H}$  NMR (500 MHz,  $\text{CDCl}_3$ ): 6.98 (1 H, d,  $J = 8.2 \text{ Hz}$ ), 6.54 (1 H, s), 6.48 (1 H, dd,  $J = 8.3, 2.7 \text{ Hz}$ ), 3.32 (4 H, q,  $J = 7.0 \text{ Hz}$ ), 2.24 (3 H, s), 2.17 (3 H, s), 1.14 (6 H, t,  $J = 7.0 \text{ Hz}$ ) ppm. –  $^{13}\text{C}$  NMR (125 MHz,  $\text{CDCl}_3$ ): 146.4,

137.3, 130.5, 123.8, 114.2, 110.2, 44.6, 20.6, 18.6, 12.7 ppm. – IR: 3061, 2968, 2929, 2893, 2875, 2244, 2614, 1509, 1485, 1374, 1265, 1198, 1024, 908, 732, 704  $\text{cm}^{-1}$ .

### *N,N*-Dimethyl-3,4-dimethylaniline (**52**)

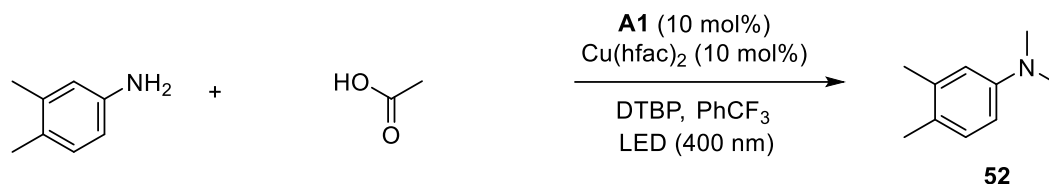

According to **GP1**, the reaction was carried out with 3,4-dimethylaniline (36 mg, 0.3 mmol), acetic acid (108 mg, 1.8 mmol, 6 equiv.), acridine **A1** (9 mg, 0.03 mmol, 10 mol%),  $\text{Cu}(\text{hfac})_2$  (14 mg, 0.03 mmol, 10 mol%), and DTBP (88 mg, 0.6 mmol, 2 equiv.) in ethyl acetate (1.5 mL). The reaction mixture was degassed using a stream of argon bubbled through a glass pipet reaching the bottom of the test-tube, while vigorous stirring was maintained for 3 min. The test-tube was capped and the reaction mixture was irradiated with LED light ( $\lambda = 400$  nm) while stirring for 36 h. The reaction mixture was then diluted with ethyl acetate (10 mL), extracted with a saturated solution of EDTA (3 mL). The organic layer was collected, dried over anhydrous  $\text{Na}_2\text{SO}_4$ , concentrated under reduced pressure, and the remaining material was purified by flash chromatography on silica gel (hexane/ ethyl acetate 98 : 2 v/v) to give the amine product **52** (22 mg, 49%) as a colorless liquid.

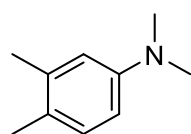

$^1\text{H}$  NMR (500 MHz,  $\text{CDCl}_3$ ): 7.00 (1 H, d,  $J = 8.3$  Hz), 6.60 (1 H, s), 6.54 (1 H, dd,  $J = 8.2, 2.7$  Hz), 2.89 (6 H, s), 2.24 (3 H, s), 2.18 (3 H, s) ppm. –  $^{13}\text{C}$  NMR (125 MHz,  $\text{CDCl}_3$ ): 149.5, 137.1, 130.3, 125.1, 115.0, 110.9, 41.3, 20.5, 18.7 ppm. – IR: 3022, 2966, 2852, 1990, 1736, 1615, 1593, 1543, 1499, 1451, 1398, 1332, 1288, 1257, 1199, 1121, 1020  $\text{cm}^{-1}$ . – HRMS: calcd for  $\text{C}_{10}\text{H}_{16}\text{N}$ : 150.1277, found 150.1279 [ $\text{M}+\text{H}^+$ ].



### *N,N*-Diethyl-3,4,5-trimethylaniline (**53**)

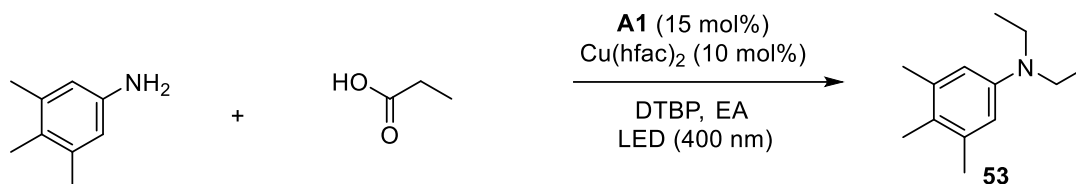

According to **GP1**, the reaction was carried out with 3,4,5-trimethylaniline (41 mg, 0.3 mmol), propionic acid (111 mg, 1.5 mmol, 5 equiv.), acridine **A1** (13 mg, 0.045 mmol, 15 mol%), Cu(hfac)<sub>2</sub> (14 mg, 0.03 mmol, 10 mol%), and DTBP (88 mg, 0.6 mmol, 2 equiv.) in ethyl acetate (1.5 mL). The reaction mixture was degassed using a stream of argon bubbled through a glass pipet reaching the bottom of the test-tube, while vigorous stirring was maintained for 3 min. The test-tube was capped and the reaction mixture was irradiated with LED light ( $\lambda = 400$  nm) while stirring for 36 h. The reaction mixture was then diluted with ethyl acetate (10 mL), extracted with a saturated solution of EDTA (3 mL). The organic layer was collected, dried over anhydrous Na<sub>2</sub>SO<sub>4</sub>, concentrated under reduced pressure, and the remaining material was purified by flash chromatography on silica gel (hexane/ ethyl acetate 98 : 2 v/v) to give the amine product **53** (39 mg, 68%) as a colorless liquid.

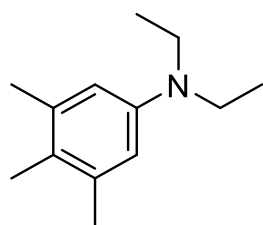

<sup>1</sup>H NMR (500 MHz, CDCl<sub>3</sub>): 6.81 (2 H, s), 3.05 (4 H, q,  $J = 7.1$  Hz), 2.24 (9 H, s), 0.99 (6 H, t,  $J = 7.1$  Hz) ppm. – <sup>13</sup>C NMR (125 MHz, CDCl<sub>3</sub>): 145.2, 138.2, 134.3, 129.4, 47.6, 20.9, 19.6, 15.0 ppm. – IR: 3061, 2968, 2927, 2869, 1771, 1735, 1606, 1586, 1497, 1445, 1398, 1289, 1234, 1201,

1126, 1043, 827, 780 cm<sup>-1</sup>. – HRMS: calcd for C<sub>13</sub>H<sub>22</sub>N: 192.1747, found 192.1746 [M+H<sup>+</sup>].

***tert*-Butyl (4-(4-(diisobutylamino)benzyl)phenyl)carbamate (54)**

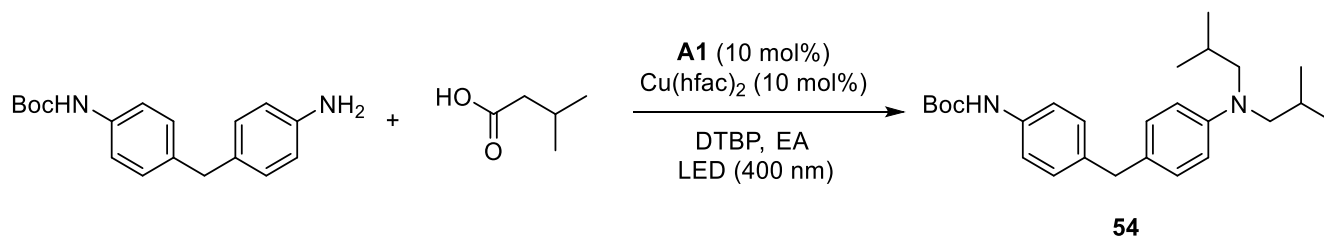

According to **GP1**, the reaction was carried out with *tert*-butyl (4-(4-aminobenzyl)phenyl)carbamate (89 mg, 0.3 mmol), isovaleric acid (77 mg, 0.75 mmol, 2.5 equiv.), acridine **A1** (9 mg, 0.03 mmol, 10 mol%), Cu(hfac)<sub>2</sub> (14 mg, 0.03 mmol, 10 mol%), and DTBP (88 mg, 0.6 mmol, 2 equiv.) in ethyl acetate (4.5 mL). The reaction mixture was degassed using a stream of argon bubbled through a glass pipet reaching the bottom of the test-tube, while vigorous stirring was maintained for 3 min. The test-tube was capped and the reaction mixture was irradiated with LED light ( $\lambda = 400$  nm) while stirring for 36 h. The reaction mixture was then diluted with ethyl acetate (10 mL), extracted with a saturated solution of EDTA (3 mL). The organic layer was collected, dried over anhydrous Na<sub>2</sub>SO<sub>4</sub>, concentrated under reduced pressure, and the remaining material was purified by flash chromatography on silica gel (hexane/ ethyl acetate 95 : 5 v/v) to give the amine product **54** (77mg, 63%) as a colorless liquid.

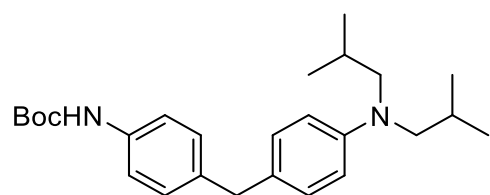

<sup>1</sup>H NMR (500 MHz, CDCl<sub>3</sub>): 7.29 (2 H, d,  $J = 7.8$  Hz), 7.16 (2 H, s), 7.02 (2 H, d,  $J = 8.5$  Hz), 6.61 (2 H, d,  $J = 8.6$  Hz), 6.50 (1 H, s), 3.85 (2 H, s), 3.14 (4 H, d,  $J = 7.2$  Hz), 2.09 (2 H, dp,  $J = 13.5, 6.7$  Hz), 1.55 (9 H, s), 0.92 (12 H, d,  $J = 6.9$  Hz) ppm. – <sup>13</sup>C NMR (125 MHz, CDCl<sub>3</sub>): 153.0, 146.7, 137.0, 136.2, 129.5, 129.4, 127.9, 118.9, 112.7, 80.4, 60.7, 40.3, 28.5, 26.5, 20.6 ppm. – IR: 3335, 3009, 2954, 2927, 2867, 1723, 1709, 1613, 1515, 1466, 1410, 1380, 1365, 1316, 1240, 1157, 1100, 1052, 1017, 906, 809, 747 cm<sup>-1</sup>. – HRMS: calcd for C<sub>26</sub>H<sub>38</sub>N<sub>2</sub>O<sub>2</sub>: 411.3006, found 411.3011 [M+H<sup>+</sup>].

### 1-Cyclohexyl-5-methoxy-1*H*-indole (55)<sup>[27]</sup>

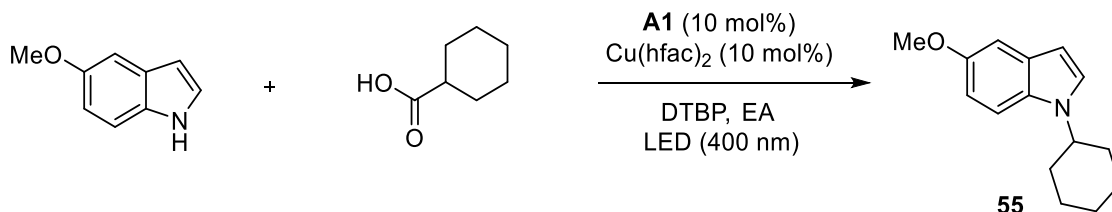

According to **GP2**, the reaction was carried out with 5-methoxy-1*H*-indole (110 mg, 0.75 mmol, 2.5 equiv.), cyclohexanecarboxylic acid (38 mg, 0.3 mmol), acridine **A1** (9 mg, 0.03 mmol, 10 mol%),  $\text{Cu}(\text{hfac})_2$  (14 mg, 0.03 mmol, 10 mol%), and DTBP (88 mg, 0.6 mmol, 2 equiv.) in ethyl acetate (3 mL). The reaction mixture was degassed using a stream of argon bubbled through a glass pipet reaching the bottom of the test-tube, while vigorous stirring was maintained for 3 min. The test-tube was capped and the reaction mixture was irradiated with LED light ( $\lambda = 400 \text{ nm}$ ) while stirring for 12 h. The reaction mixture was then diluted with ethyl acetate (10 mL), extracted with a saturated solution of EDTA (3 mL). The organic layer was collected, dried over anhydrous  $\text{Na}_2\text{SO}_4$ , concentrated under reduced pressure, and the remaining material was purified by flash chromatography on silica gel (hexane/ ethyl acetate 95 : 5 v/v) to give the amine product **55** (39 mg, 57%) as a colorless liquid.

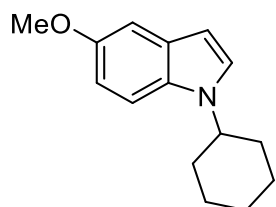

$^1\text{H}$  NMR (500 MHz,  $\text{CDCl}_3$ ): 7.28 (1 H, d,  $J = 8.9 \text{ Hz}$ ), 7.20 (1 H, d,  $J = 3.1 \text{ Hz}$ ), 7.11 (1 H, d,  $J = 2.4 \text{ Hz}$ ), 6.88 (1 H, dd,  $J = 8.9, 2.4 \text{ Hz}$ ), 6.43 (1 H d,  $J = 3.1 \text{ Hz}$ ), 4.17 (1 H, tt,  $J = 11.9, 3.8 \text{ Hz}$ ), 3.86 (3 H, s), 2.14 (2 H, d,  $J = 12.8 \text{ Hz}$ ), 1.94 (2 H, d,  $J = 13.8 \text{ Hz}$ ), 1.80 (1 H, d,  $J = 13.2 \text{ Hz}$ ), 1.70 (2 H qd,  $J = 12.6, 3.5 \text{ Hz}$ ), 1.50 (2 H, qt,  $J = 13.1, 3.5 \text{ Hz}$ ), 1.37–1.18 (1 H, m) ppm. –  $^{13}\text{C}$  NMR (125 MHz,  $\text{CDCl}_3$ ): 154.0, 131.0, 128.8, 124.7, 111.6, 110.3, 102.6, 100.6, 56.0, 55.4, 33.7, 26.1, 25.8 ppm. – IR: 3006, 2931, 2854, 2833, 1748, 1713, 1618, 1575, 1480, 1449, 1352, 1234, 1211, 1189, 1150, 1034, 908, 810  $\text{cm}^{-1}$ .

### 1-Cyclohexyl-3-methyl-1H-indole (56)<sup>[27]</sup>

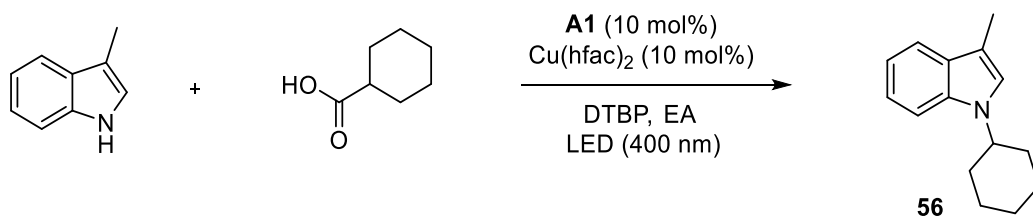

According to **GP2**, the reaction was carried out with 3-methyl-1H-indole (98 mg, 0.75 mmol, 2.5 equiv.), cyclohexanecarboxylic acid (38 mg, 0.3 mmol), acridine **A1** (9 mg, 0.03 mmol, 10 mol%), Cu(hfac)<sub>2</sub> (14 mg, 0.03 mmol, 10 mol%), and DTBP (88 mg, 0.6 mmol, 2 equiv.) in ethyl acetate (3 mL). The reaction mixture was degassed using a stream of argon bubbled through a glass pipet reaching the bottom of the test-tube, while vigorous stirring was maintained for 3 min. The test-tube was capped and the reaction mixture was irradiated with LED light ( $\lambda = 400$  nm) while stirring for 12 h. The reaction mixture was then diluted with ethyl acetate (10 mL), extracted with a saturated solution of EDTA (3 mL). The organic layer was collected, dried over anhydrous Na<sub>2</sub>SO<sub>4</sub>, concentrated under reduced pressure, and the remaining material was purified by flash chromatography on silica gel (hexane/ ethyl acetate 95 : 5 v/v) to give the amine product **56** (34 mg, 53%) as a brown liquid.

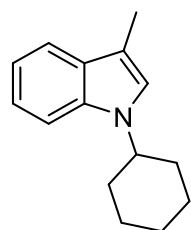

<sup>1</sup>H NMR (500 MHz, CDCl<sub>3</sub>): 7.59 (1 H, d,  $J = 7.9$  Hz), 7.36 (1 H, d,  $J = 8.3$  Hz), 7.26–7.19 (1 H, m), 7.11 (1 H, t,  $J = 7.8$  Hz), 7.02 (1 H, s), 4.19 (1 H, tt,  $J = 11.9, 3.8$  Hz), 2.36 (3 H, d,  $J = 1.2$  Hz), 2.13 (2 H, d,  $J = 13.1$  Hz), 1.95 (2 H, d,  $J = 13.5$  Hz), 1.81 (1 H, d,  $J = 13.2$  Hz), 1.71 (2 H, qd,  $J = 12.6, 3.3$  Hz), 1.55–1.45 (2 H, m), 1.30 (1 H, qt,  $J = 13.0, 3.7$  Hz) ppm. – <sup>13</sup>C NMR (125 MHz, CDCl<sub>3</sub>): 135.9, 128.6, 121.9, 121.2, 119.1, 118.6, 110.2, 109.3, 54.9, 33.7, 26.2, 25.8, 9.8 ppm. – IR: 3006, 2935, 2858, 1717, 1614, 1461, 1424, 1359, 1220, 1091, 1014, 907 cm<sup>-1</sup>.

### 3-Methyl-1-(tetrahydro-2H-pyran-4-yl)-1H-indole (57)

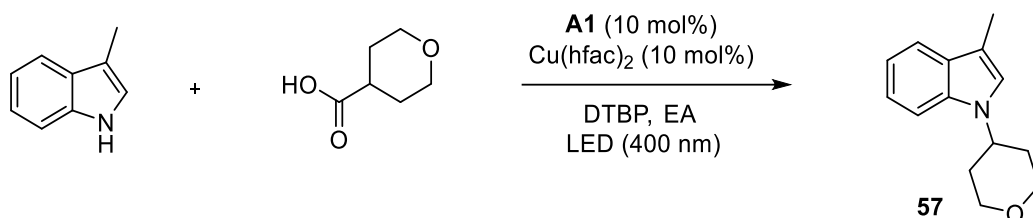

According to **GP2**, the reaction was carried out with 3-methyl-1H-indole (98 mg, 0.75 mmol, 2.5 equiv.), tetrahydro-2H-pyran-4-carboxylic acid (39 mg, 0.3 mmol), acridine **A1** (9 mg, 0.03 mmol, 10 mol%), Cu(hfac)<sub>2</sub> (14 mg, 0.03 mmol, 10 mol%), and DTBP (88 mg, 0.6 mmol, 2 equiv.) in ethyl acetate (3 mL). The reaction mixture was degassed using a stream of argon bubbled through a glass pipet reaching the bottom of the test-tube, while vigorous stirring was maintained for 3 min. The test-tube was capped and the reaction mixture was irradiated with LED light ( $\lambda = 400$  nm) while stirring for 12 h. The reaction mixture was then diluted with ethyl acetate (10 mL), extracted with a saturated solution of EDTA (3 mL). The organic layer was collected, dried over anhydrous Na<sub>2</sub>SO<sub>4</sub>, concentrated under reduced pressure, and the remaining material was purified by flash chromatography on silica gel (hexane/ ethyl acetate 95 : 5 v/v) to give the amine product **57** (56 mg, 87%) as a brown liquid.

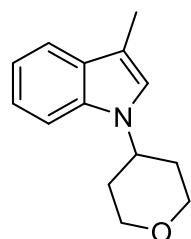

<sup>1</sup>H NMR (500 MHz, CDCl<sub>3</sub>): 7.60 (1 H, d,  $J = 7.8$  Hz), 7.37 (1 H, d,  $J = 8.2$  Hz), 7.29–7.19 (1 H, m), 7.13 (1 H, td,  $J = 7.7, 2.8$  Hz), 7.01 (1 H, s), 4.43 (1 H, tt,  $J = 11.6, 4.4$  Hz), 4.16 (2 H, dd,  $J = 11.8, 4.4$  Hz), 3.62 (2 H, td,  $J = 11.9, 2.1$  Hz), 2.36 (3 H, s), 2.10 (2 H, qd,  $J = 12.2, 4.5$  Hz), 2.02 (2 H, dd,  $J = 12.6, 2.5$  Hz) ppm. – <sup>13</sup>C NMR (125 MHz, CDCl<sub>3</sub>): 135.8, 128.8, 121.6, 121.5, 119.3, 118.9, 110.9, 109.1, 67.7, 52.2, 33.6, 9.8 ppm. – IR: 3087, 3047, 3024, 2953, 2923, 2846, 2763, 1737, 1462, 1384, 1357, 1238, 1224, 1144, 1087, 1009, 981, 877, 827 cm<sup>-1</sup>. – HRMS: calcd for C<sub>14</sub>H<sub>18</sub>NO: 216.1383, found 216.1387 [M+H<sup>+</sup>].

#### 4-Cyclohexyl-1,2,3,4-tetrahydrocyclopenta[*b*]indole (58)

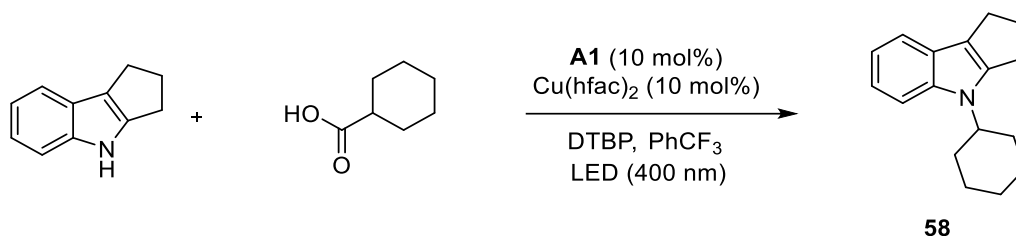

According to **GP1**, the reaction was carried out with 1,2,3,4-tetrahydrocyclopenta[*b*]indole (47 mg, 0.3 mmol), cyclohexanecarboxylic acid (98 mg, 0.75 mmol, 2.5 equiv.), acridine **A1** (9 mg, 0.03 mmol, 10 mol%), Cu(hfac)<sub>2</sub> (14 mg, 0.03 mmol, 10 mol%), and DTBP (88 mg, 0.6 mmol, 2 equiv.) in trifluorotoluene (4.5 mL). The reaction mixture was degassed using a stream of argon bubbled through a glass pipet reaching the bottom of the test-tube, while vigorous stirring was maintained for 3 min. The test-tube was capped and the reaction mixture was irradiated with LED light ( $\lambda = 400$  nm) while stirring for 36 h. The reaction mixture was then diluted with ethyl acetate (10 mL), extracted with a saturated solution of EDTA (3 mL). The organic layer was collected, dried over anhydrous Na<sub>2</sub>SO<sub>4</sub>, concentrated under reduced pressure, and the remaining material was purified by flash chromatography on silica gel (hexane/ ethyl acetate 95 : 5 v/v) to give the amine product **58** (37mg, 52%) as a yellow liquid.

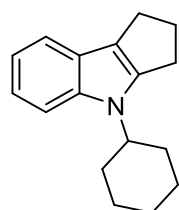

<sup>1</sup>H NMR (500 MHz, CDCl<sub>3</sub>): 7.45 (1 H, d, *J* = 7.7 Hz), 7.35 (1 H, d, *J* = 8.2 Hz), 7.12 (1 H, t, *J* = 7.2 Hz), 7.07 (1 H t, *J* = 7.4 Hz), 4.20 (1 H tt, *J* = 12.1, 3.8 Hz), 2.99 (2 H, t, *J* = 7.1 Hz), 2.83 (2 H, t, *J* = 7.0 Hz), 2.54 (2 H p, *J* = 7.1 Hz), 2.03 (2 H, d, *J* = 12.6 Hz), 1.94 (2 H, d, *J* = 13.6 Hz), 1.81 (3 H, qd, *J* = 12.4, 3.4 Hz), 1.49 (2 H, tdd, *J* = 13.2, 8.3, 3.3 Hz), 1.28 (1 H, qt, *J* = 13.2, 3.7 Hz) ppm. – <sup>13</sup>C NMR (125 MHz, CDCl<sub>3</sub>): 144.5, 140.5, 124.3, 119.9, 119.0, 118.8, 118.6, 109.9, 55.6, 33.1, 28.9, 28.0, 26.4, 25.8, 24.0 ppm. – IR: 3394, 3050, 2982, 2932, 2852, 1620, 1562, 1453, 1367, 1336, 1168, 736 cm<sup>-1</sup>. – HRMS: calcd for C<sub>17</sub>H<sub>21</sub>N: 239.1674, found 239.1678 [M<sup>+</sup>].

### 3,6-Di-*tert*-butyl-9-(tetrahydro-2*H*-pyran-4-yl)-9*H*-carbazole (**59**)

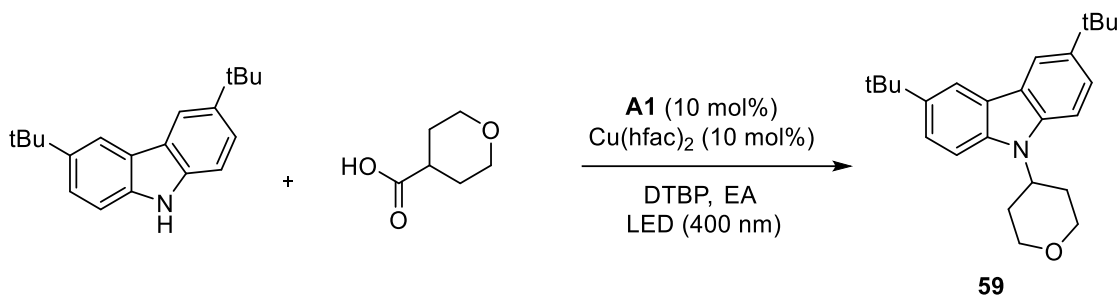

According to **GP2**, the reaction was carried out with 3,6-di-*tert*-butyl-9*H*-carbazole (209 mg, 0.75 mmol, 2.5 equiv.), tetrahydro-2*H*-pyran-4-carboxylic acid (39 mg, 0.3 mmol), acridine **A1** (9 mg, 0.03 mmol, 10 mol%), Cu(hfac)<sub>2</sub> (14 mg, 0.03 mmol, 10 mol%), and DTBP (88 mg, 0.6 mmol, 2 equiv.) in ethyl acetate (3 mL). The reaction mixture was degassed using a stream of argon bubbled through a glass pipet reaching the bottom of the test-tube, while vigorous stirring was maintained for 3 min. The test-tube was capped and the reaction mixture was irradiated with LED light ( $\lambda = 400$  nm) while stirring for 12 h. The reaction mixture was then diluted with ethyl acetate (10 mL), extracted with a saturated solution of EDTA (3 mL). The organic layer was collected, dried over anhydrous Na<sub>2</sub>SO<sub>4</sub>, concentrated under reduced pressure, and the remaining material was purified by flash chromatography on silica gel (hexane/ ethyl acetate 9 : 1 v/v) to give the amine product **59** (80 mg, 73%) as a colorless solid.

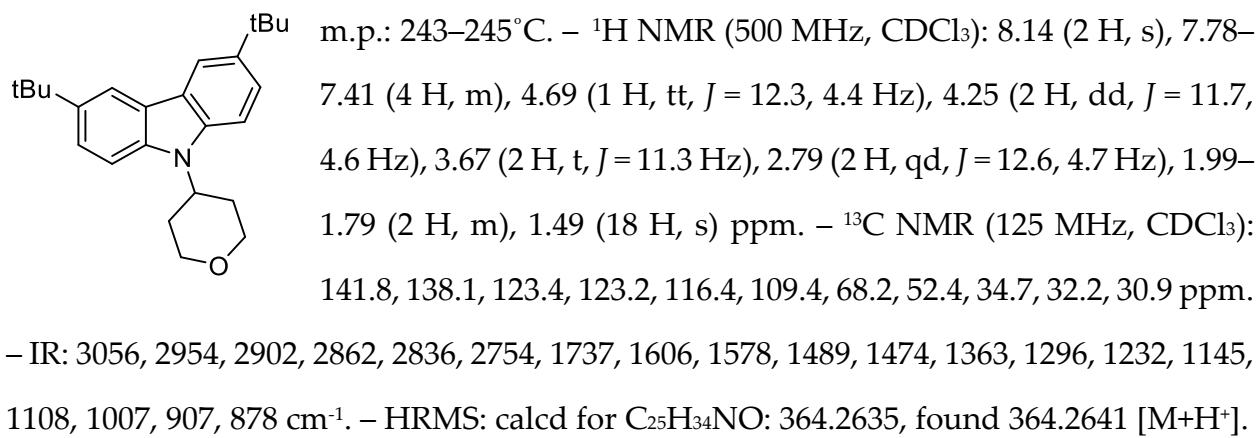

### N-Cyclohexyl-2-methylquinolin-8-amine (60)

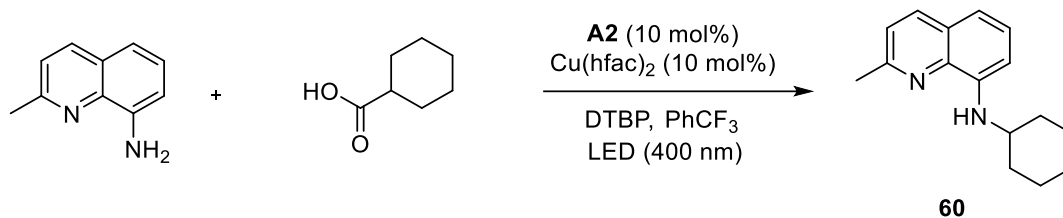

According to **GP1**, the reaction was carried out with 2-methylquinolin-8-amine (47 mg, 0.3 mmol), cyclohexanecarboxylic acid (98 mg, 0.75 mmol, 2.5 equiv.), acridine **A2** (9 mg, 0.03 mmol, 10 mol%), Cu(hfac)<sub>2</sub> (14 mg, 0.03 mmol, 10 mol%), and DTBP (88 mg, 0.6 mmol, 2 equiv.) in ethyl acetate (3 mL). The reaction mixture was degassed using a stream of argon bubbled through a glass pipet reaching the bottom of the test-tube, while vigorous stirring was maintained for 3 min. The test-tube was capped and the reaction mixture was irradiated with LED light ( $\lambda = 400$  nm) while stirring for 24 h. The reaction mixture was then diluted with ethyl acetate (10 mL), extracted with a saturated solution of EDTA (3 mL). The organic layer was collected, dried over anhydrous Na<sub>2</sub>SO<sub>4</sub>, concentrated under reduced pressure, and the remaining material was purified by flash chromatography on silica gel (hexane/ ethyl acetate 95 : 5 v/v) to give the amine product **60** (43 mg, 60%) as a brown solid.

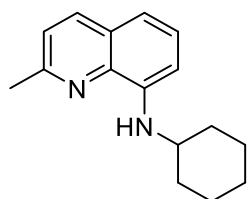

m.p.: 35–37 °C. – <sup>1</sup>H NMR (500 MHz, CDCl<sub>3</sub>): 7.91 (1 H, d, *J* = 8.3 Hz), 7.29 (1 H, t, *J* = 7.9 Hz), 7.22 (1 H, d, *J* = 8.3 Hz), 6.95 (1 H, d, *J* = 8.1 Hz), 6.66 (1 H, d, *J* = 7.6 Hz), 6.16 (1 H, brs), 3.45 (1 H, s), 2.69 (3 H, s), 2.18 (2 H, d, *J* = 11.6 Hz), 1.84 (2 H, d, *J* = 13.0 Hz), 1.70 (1 H, d, *J* = 13.1 Hz), 1.60–1.21 (7 H, m) ppm. – <sup>13</sup>C NMR (125 MHz, CDCl<sub>3</sub>): 155.5, 143.4, 137.6, 136.2, 126.9, 126.8, 122.1, 113.1, 105.0, 51.4, 33.2, 26.2, 25.3 ppm. – IR: 3385, 3017, 2930, 2854, 2399, 1711, 1614, 1595, 1589, 1519, 1487, 1463, 1450, 1434, 1344, 1303, 1246, 1213, 1125 cm<sup>-1</sup>. – HRMS: calcd for C<sub>16</sub>H<sub>12</sub>N<sub>2</sub>: 241.1699, found 241.1701 [M+H<sup>+</sup>].



### N-Methylquinolin-5-amine (**61**)<sup>[28]</sup>

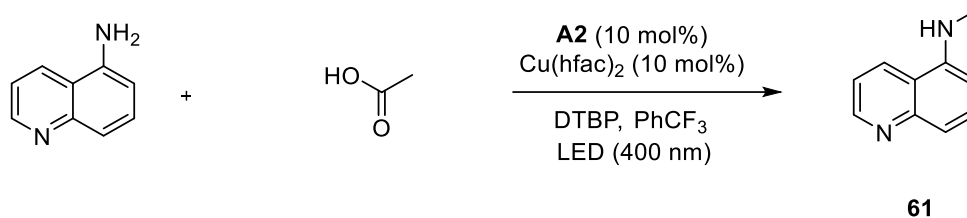

According to **GP1**, the reaction was carried out with quinolin-5-amine (43 mg, 0.3 mmol), acetic acid (90 mg, 1.5 mmol, 5.0 equiv.), acridine **A2** (9 mg, 0.03 mmol, 10 mol%), Cu(hfac)<sub>2</sub> (14 mg, 0.03 mmol, 10 mol%), and DTBP (88 mg, 0.6 mmol, 2 equiv.) in ethyl acetate (3 mL). The reaction mixture was degassed using a stream of argon bubbled through a glass pipet reaching the bottom of the test-tube, while vigorous stirring was maintained for 3 min. The test-tube was capped and the reaction mixture was irradiated with LED light ( $\lambda = 400$  nm) while stirring for 24 h. The reaction mixture was then diluted with ethyl acetate (10 mL), extracted with a saturated solution of EDTA (3 mL). The organic layer was collected, dried over anhydrous Na<sub>2</sub>SO<sub>4</sub>, concentrated under reduced pressure, and the remaining material was purified by flash chromatography on silica gel (hexane/ ethyl acetate 95 : 5 v/v) to give the amine product **61** (25 mg, 52%) as a yellow liquid.

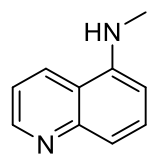

<sup>1</sup>H NMR (500 MHz, CDCl<sub>3</sub>): 8.71 (1 H, dd,  $J = 4.3, 1.7$  Hz), 8.05 (1 H, d,  $J = 1.5$  Hz), 7.41 (1 H, t,  $J = 7.9$  Hz), 7.37 (1 H, dd,  $J = 8.2, 4.2$  Hz), 7.05 (1 H, d,  $J = 8.1$  Hz), 6.65 (1 H, d,  $J = 7.6$  Hz), 6.13 (1 H, brs), 3.05 (3 H, s) ppm. – <sup>13</sup>C NMR (125

MHz, CDCl<sub>3</sub>): 146.9, 146.0, 138.4, 136.1, 128.7, 128.0, 121.5, 113.8, 104.3, 30.2 ppm. – IR: 3438, 3048, 2921, 2844, 1621, 1581, 1517, 1403, 1370, 2395, 1251, 1151, 1062 cm<sup>-1</sup>.

### *N*-Isobutylquinolin-5-amine (**62**)<sup>[29]</sup>

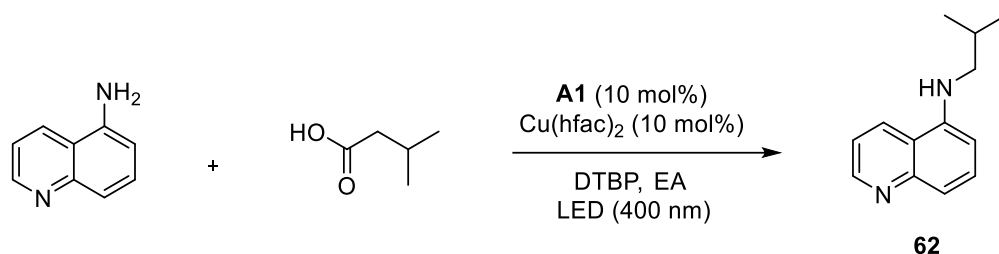

According to **GP1**, the reaction was carried out with quinolin-5-amine (43 mg, 0.3 mmol), isovaleric acid (77 mg, 0.75 mmol, 2.5 equiv.), acridine **A1** (9 mg, 0.03 mmol, 10 mol%),  $\text{Cu}(\text{hfac})_2$  (14 mg, 0.03 mmol, 10 mol%), and DTBP (88 mg, 0.6 mmol, 2 equiv.) in ethyl acetate (4.5 mL). The reaction mixture was degassed using a stream of argon bubbled through a glass pipet reaching the bottom of the test-tube, while vigorous stirring was maintained for 3 min. The test-tube was capped and the reaction mixture was irradiated with LED light ( $\lambda = 400$  nm) while stirring for 36 h. The reaction mixture was then diluted with ethyl acetate (10 mL), extracted with a saturated solution of EDTA (3 mL). The organic layer was collected, dried over anhydrous  $\text{Na}_2\text{SO}_4$ , concentrated under reduced pressure, and the remaining material was purified by flash chromatography on silica gel (hexane/ ethyl acetate 95 : 5 v/v) to give the amine product **62** (44 mg, 73%) as a colorless liquid.

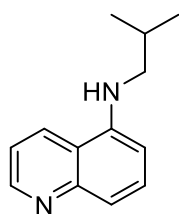

$^1\text{H}$  NMR (500 MHz,  $\text{CDCl}_3$ ): 8.84 (1 H, d,  $J = 4.0$  Hz), 8.16 (1 H, d,  $J = 8.5$  Hz), 7.54 (1 H, t,  $J = 8.1$  Hz), 7.46 (1 H, d,  $J = 8.4$  Hz), 7.28 (1 H, dd,  $J = 8.5$ , 4.2 Hz), 6.60 (1 H, d,  $J = 7.6$  Hz), 4.45 (1 H, brs), 3.08 (2 H, d,  $J = 6.7$  Hz), 2.03 (1 H, dq,  $J = 13.4$ , 6.7 Hz), 1.06 (6 H, d,  $J = 6.7$  Hz) ppm. –  $^{13}\text{C}$  NMR (125

MHz,  $\text{CDCl}_3$ ): 149.9, 149.2, 144.0, 130.6, 128.8, 119.2, 118.4, 118.0, 104.6, 52.0, 28.0, 20.8 ppm. – IR: 3321, 3070, 2956, 2933, 2868, 1756, 1732, 1611, 1586, 1577, 1532, 1480, 1465, 1385, 1366, 1146. 1107, 788, 739  $\text{cm}^{-1}$ .

### *N*-Isobutylquinolin-8-amine (**63**)<sup>[29]</sup>

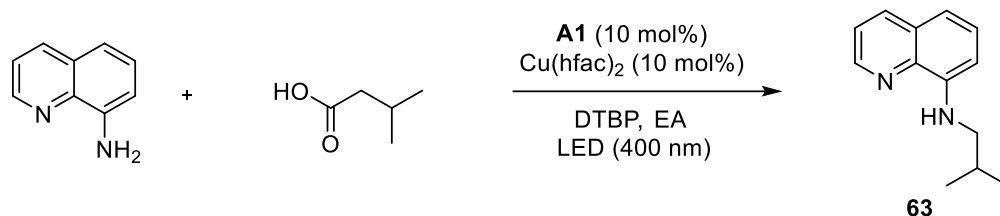

According to **GP1**, the reaction was carried out with quinolin-8-amine (43 mg, 0.3 mmol), isovaleric acid (77 mg, 0.75 mmol, 2.5 equiv.), acridine **A1** (9 mg, 0.03 mmol, 10 mol%),  $\text{Cu}(\text{hfac})_2$  (14 mg, 0.03 mmol, 10 mol%), and DTBP (88 mg, 0.6 mmol, 2 equiv.) in ethyl acetate (4.5 mL). The reaction mixture was degassed using a stream of argon bubbled through a glass pipet reaching the bottom of the test-tube, while vigorous stirring was maintained for 3 min. The test-tube was capped and the reaction mixture was irradiated with LED light ( $\lambda = 400$  nm) while stirring for 36 h. The reaction mixture was then diluted with ethyl acetate (10 mL), extracted with a saturated solution of EDTA (3 mL). The organic layer was collected, dried over anhydrous  $\text{Na}_2\text{SO}_4$ , concentrated under reduced pressure, and the remaining material was purified by flash chromatography on silica gel (hexane/ ethyl acetate 95 : 5 v/v) to give the amine product **63** (51 mg, 85%) as a colorless liquid.

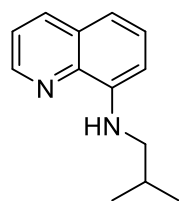

$^1\text{H}$  NMR (500 MHz,  $\text{CDCl}_3$ ): 8.73 (1 H, d,  $J = 5.5$  Hz), 8.05 (1 H, d,  $J = 8.2$  Hz), 7.40 (1 H, d,  $J = 7.9$  Hz), 7.39–7.33 (1 H, m), 7.07–6.99 (1 H, m), 6.74–6.55 (1 H, m), 6.31 (1 H, brs), 3.16 (2 H, d,  $J = 6.8$  Hz), 2.10 (1 H, dq,  $J = 13.4, 6.7$  Hz), 1.09 (6 H, d,  $J = 6.7$  Hz) ppm. –  $^{13}\text{C}$  NMR (125 MHz,  $\text{CDCl}_3$ ): 146.8, 145.2, 138.3, 136.1, 128.8, 127.9, 121.4, 113.4, 104.5, 51.4, 28.1, 20.8 ppm. – IR: 3411, 3055, 3048, 2956, 2933, 2865, 1611, 1575, 1522, 1481, 1452, 1381, 1337, 1264, 1152, 907  $\text{cm}^{-1}$ .

### 3-Methyl-1-(tetrahydro-2H-pyran-4-yl)-1H-indazole (64)

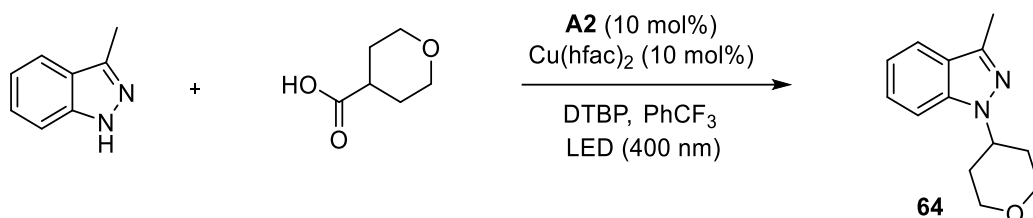

According to **GP1**, the reaction was carried out with 3-methyl-1H-indazole (40 mg, 0.3 mmol), tetrahydro-2H-pyran-4-carboxylic acid (98 mg, 0.75 mmol, 2.5 equiv.), acridine **A2** (9 mg, 0.03 mmol, 10 mol%), Cu(hfac)<sub>2</sub> (14 mg, 0.03 mmol, 10 mol%), and DTBP (88 mg, 0.6 mmol, 2 equiv.) in ethyl trifluorotoluene (4.5 mL). The reaction mixture was degassed using a stream of argon bubbled through a glass pipet reaching the bottom of the test-tube, while vigorous stirring was maintained for 3 min. The test-tube was capped and the reaction mixture was irradiated with LED light ( $\lambda = 400$  nm) while stirring for 36 h. The reaction mixture was then diluted with ethyl acetate (10 mL), extracted with a saturated solution of EDTA (3 mL). The organic layer was collected, dried over anhydrous Na<sub>2</sub>SO<sub>4</sub>, concentrated under reduced pressure, and the remaining material was purified by flash chromatography on silica gel (hexane/ ethyl acetate 4 : 1 v/v) to give the amine product **64** (54 mg, 83%) as a colorless solid.

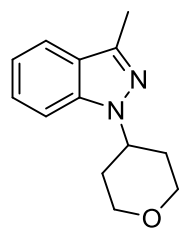

m.p.: 59–62 °C. – <sup>1</sup>H NMR (500 MHz, CDCl<sub>3</sub>): 7.66 (1 H, d, *J* = 8.1 Hz), 7.41 (1 H, d, *J* = 8.4 Hz), 7.38–7.32 (1 H, m), 7.12 (1 H, t, *J* = 7.4 Hz), 4.57 (1 H, tt, *J* = 11.7, 4.2 Hz), 4.16 (2 H, dd, *J* = 11.8, 4.6 Hz), 3.60 (2 H, t, *J* = 11.9 Hz), 2.58 (3 H, s), 2.41 (2 H, qd, *J* = 12.2, 4.5 Hz), 1.95 (2 H, dd, *J* = 12.8, 2.3 Hz) ppm.

– <sup>13</sup>C NMR (125 MHz, CDCl<sub>3</sub>): 141.4, 139.6, 126.1, 123.7, 120.7, 119.8, 108.9, 67.5, 55.1, 32.5, 12.0 ppm. – IR: 3058, 2958, 2923, 2845, 2768. 1736, 1722, 1613, 1505, 1448, 1324, 1295, 1203, 1145, 1089, 1012, 981, 879, 775, 760 cm<sup>-1</sup>. – HRMS: calcd for C<sub>13</sub>H<sub>17</sub>N<sub>2</sub>O: 217.1335, found 217.1335 [M+H<sup>+</sup>].

### 1-(Tetrahydro-2H-pyran-4-yl)-1H-indazole (65)

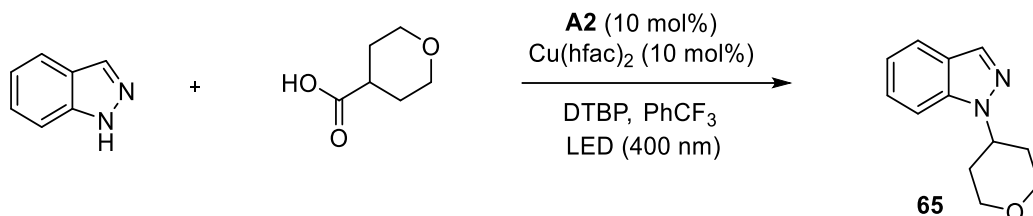

According to **GP1**, the reaction was carried out with 1H-indazole (35 mg, 0.3 mmol), tetrahydro-2H-pyran-4-carboxylic acid (98 mg, 0.75 mmol, 2.5 equiv.), acridine **A2** (9 mg, 0.03 mmol, 10 mol%), Cu(hfac)<sub>2</sub> (14 mg, 0.03 mmol, 10 mol%), and DTBP (88 mg, 0.6 mmol, 2 equiv.) in trifluorotoluene (4.5 mL). The reaction mixture was degassed using a stream of argon bubbled through a glass pipet reaching the bottom of the test-tube, while vigorous stirring was maintained for 3 min. The test-tube was capped and the reaction mixture was irradiated with LED light ( $\lambda = 400$  nm) while stirring for 36 h. The reaction mixture was then diluted with ethyl acetate (10 mL), extracted with a saturated solution of EDTA (3 mL). The organic layer was collected, dried over anhydrous Na<sub>2</sub>SO<sub>4</sub>, concentrated under reduced pressure, and the remaining material was purified by flash chromatography on silica gel (hexane/ ethyl acetate 4 : 1 v/v) to give the amine product **65** (58 mg, 95%) as a colorless solid.

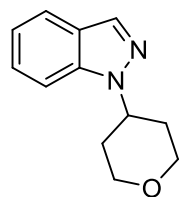

m.p.: 62–65 °C. <sup>1</sup>H NMR (500 MHz, CDCl<sub>3</sub>): 8.02 (1 H, s), 7.75 (1 H, d, *J* = 8.1 Hz), 7.47 (1 H, d, *J* = 8.5 Hz), 7.38 (1 H, t, *J* = 7.6 Hz), 7.15 (1 H, t, *J* = 7.5 Hz), 4.65 (1 H, tt, *J* = 11.6, 4.2 Hz), 4.18 (2 H, dd, *J* = 11.1, 3.9 Hz), 3.63 (2 H, t, *J* = 11.9 Hz), 2.42 (2 H, qd, *J* = 12.2, 4.5 Hz), 1.99 (2 H, d, *J* = 14.9 Hz) ppm.

– <sup>13</sup>C NMR (125 MHz, CDCl<sub>3</sub>): 138.7, 133.0, 126.2, 124.4, 121.4, 120.7, 109.0, 67.4, 55.3, 32.5 ppm. – IR: 3063, 2960, 2930, 2846, 1745, 1644, 1463, 1425, 1363, 1233, 1194, 1145, 1090, 1145, 1015, 827 cm<sup>-1</sup>. – HRMS: calcd for C<sub>12</sub>H<sub>15</sub>N<sub>2</sub>O: 203.1179, found 203.1179 [M+H<sup>+</sup>].

### Methyl 2-(pentadecylamino)thiophene-3-carboxylate (**66**)

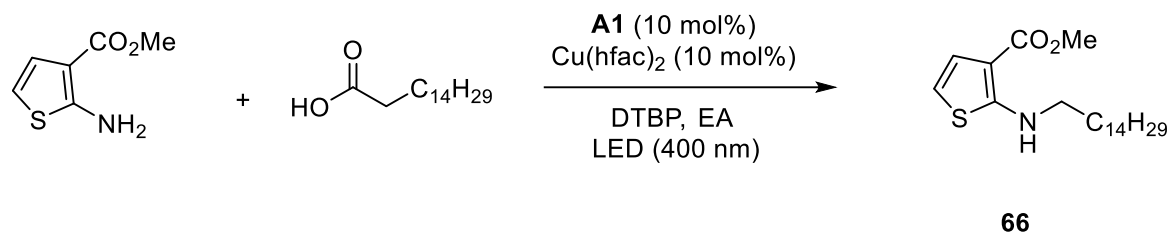

According to **GP1**, the reaction was carried out with methyl 2-aminothiophene-3-carboxylate (47 mg, 0.3 mmol), palmitic acid (192 mg, 0.75 mmol, 2.5 equiv.), acridine **A1** (9 mg, 0.03 mmol, 10 mol%), Cu(hfac)<sub>2</sub> (14 mg, 0.03 mmol, 10 mol%), and DTBP (88 mg, 0.6 mmol, 2 equiv.) in ethyl acetate (3 mL). The reaction mixture was degassed using a stream of argon bubbled through a glass pipet reaching the bottom of the test-tube, while vigorous stirring was maintained for 3 min. The test-tube was capped and the reaction mixture was irradiated with LED light ( $\lambda = 400$  nm) while stirring for 12 h. The reaction mixture was then diluted with ethyl acetate (10 mL), extracted with a saturated solution of EDTA (3 mL). The organic layer was collected, dried over anhydrous Na<sub>2</sub>SO<sub>4</sub>, concentrated under reduced pressure, and the remaining material was purified by flash chromatography on silica gel (hexane/ ethyl acetate 95 : 9 v/v) to give the amine product **66** (101 mg, 92%) as a brown liquid that glassified upon standing.

**Gram scale for compound 66:** According to **GP1**, the reaction was carried out with methyl 2-aminothiophene-3-carboxylate (0.79 g, 5 mmol), palmitic acid (3.2 g, 12.5 mmol, 2.5 equiv.), acridine **A1** (147 mg, 0.5 mmol, 10 mol%), Cu(hfac)<sub>2</sub> (233 mg, 0.5 mmol, 10 mol%), and DTBP (1.46 mg, 10 mmol, 2 equiv.) in ethyl acetate (75 mL). The reaction mixture was degassed using a stream of argon bubbled through a glass pipet reaching the bottom of the test-tube, while vigorous stirring was maintained for 3 min. The test-tube was capped and the reaction mixture was irradiated with LED light ( $\lambda = 400$  nm) while stirring for 12 h. The reaction mixture was then diluted with ethyl acetate (100 mL), extracted with a saturated solution of EDTA (30 mL). The organic layer was collected, washed with

saturated sodium carbonate (3x10 mL), dried over anhydrous Na<sub>2</sub>SO<sub>4</sub>, concentrated under reduced pressure, and the remaining material was purified by flash chromatography on silica gel (hexane/ ethyl acetate 95 : 5 v/v) to give the amine product **66** (1.2 g, 63 %) as a brown liquid that glassified upon standing.

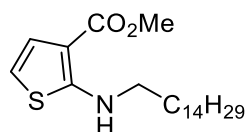

<sup>1</sup>H NMR (500 MHz, CDCl<sub>3</sub>): 7.40 (1 H, s), 7.01 (1 H, d, *J* = 5.7 Hz), 6.14 (1 H, d, *J* = 5.7 Hz), 3.79 (3 H, s), 3.21 (2 H, td, *J* = 7.0, 5.5 Hz), 1.69 (2 H, quint., *J* = 7.1 Hz), 1.47–1.36 (2 H, m), 1.36–1.27 (22 H, m), 0.88 (3 H, t, *J* = 6.9 Hz) ppm. – <sup>13</sup>C NMR (125 MHz, CDCl<sub>3</sub>): 166.2, 166.0, 126.2, 105.4, 103.1, 5.79, 47.8, 31.9, 29.7, 29.7, 29.6, 29.5, 29.4, 29.3, 29.2, 26.9, 22.7, 14.1 ppm. – IR: 3331, 3121, 2922, 2852, 2251, 1669, 1547, 1513, 1440, 1387, 1341, 1302, 1241, 1192, 1105 cm<sup>-1</sup>. – HRMS: calcd for C<sub>22</sub>H<sub>38</sub>NO<sub>2</sub>S: 368.2618, found 368.2614 [M+H<sup>+</sup>].

### Diethyl 3-methyl-5-((tetrahydro-2*H*-pyran-4-yl)amino)thiophene-2,4-dicarboxylate

(**67**)

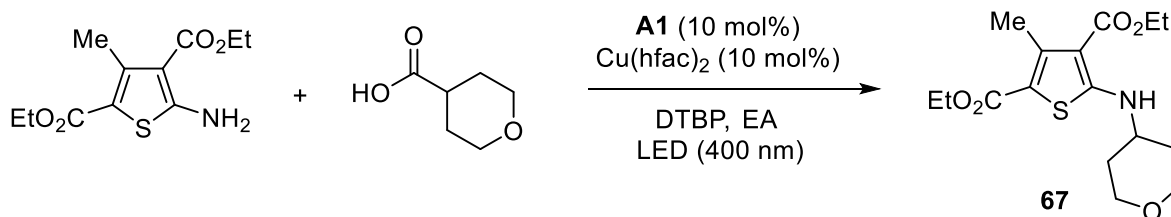

According to **GP1**, the reaction was carried out with diethyl 5-amino-3-methylthiophene-2,4-dicarboxylate (79 mg, 0.3 mmol), tetrahydro-2*H*-pyran-4-carboxylic acid (98 mg, 0.75 mmol, 2.5 equiv.), acridine **A1** (9 mg, 0.03 mmol, 10 mol%), Cu(hfac)<sub>2</sub> (14 mg, 0.03 mmol, 10 mol%), and DTBP (88 mg, 0.6 mmol, 2 equiv.) in ethyl acetate (3 mL). The reaction mixture was degassed using a stream of argon bubbled through a glass pipet reaching the bottom of the test-tube, while vigorous stirring was maintained for 3 min. The test-tube was capped and the reaction mixture was irradiated with LED light ( $\lambda = 400$  nm) while stirring for 12 h. The reaction mixture was then diluted with ethyl acetate (10 mL), extracted with a saturated solution of EDTA (3 mL). The organic layer was collected,

dried over anhydrous Na<sub>2</sub>SO<sub>4</sub>, concentrated under reduced pressure, and the remaining material was purified by flash chromatography on silica gel (hexane/ ethyl acetate 1 : 9 v/v) to give the amine product **67** (79 mg, 77%) as a yellow liquid.

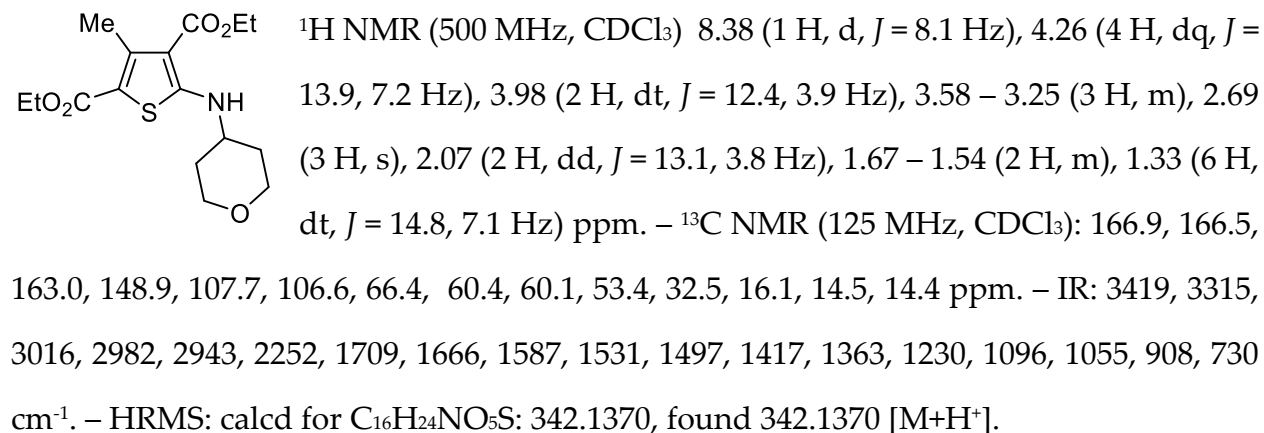

**Ethyl 2-((tetrahydro-2H-pyran-4-yl)amino)-5,6,7,8-tetrahydro-4H-cyclohepta[b]thiophene-3-carboxylate (68)**

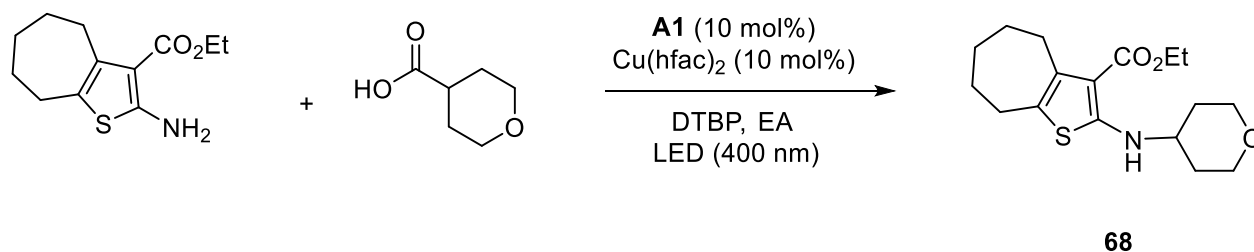

According to **GP1**, the reaction was carried out with ethyl 2-amino-5,6,7,8-tetrahydro-4H-cyclohepta[b]thiophene-3-carboxylate (72 mg, 0.3 mmol), tetrahydro-2H-pyran-4-carboxylic acid (98 mg, 0.75 mmol, 2.5 equiv.), acridine **A1** (9 mg, 0.03 mmol, 10 mol%), Cu(hfac)<sub>2</sub> (14 mg, 0.03 mmol, 10 mol%), and DTBP (88 mg, 0.6 mmol, 2 equiv.) in ethyl acetate (3 mL). The reaction mixture was degassed using a stream of argon bubbled through a glass pipet reaching the bottom of the test-tube, while vigorous stirring was maintained for 3 min. The test-tube was capped and the reaction mixture was irradiated with LED light ( $\lambda = 400$  nm) while stirring for 36 h. The reaction mixture was then diluted with ethyl acetate (10 mL), extracted with a saturated solution of EDTA (3 mL). The



organic layer was collected, dried over anhydrous Na<sub>2</sub>SO<sub>4</sub>, concentrated under reduced pressure, and the remaining material was purified by flash chromatography on silica gel (hexane/ ethyl acetate 1 : 4 v/v) to give the amine product **68** (69 mg, 71%) as a yellow liquid.

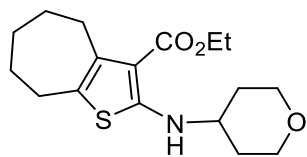

<sup>1</sup>H NMR (500 MHz, CDCl<sub>3</sub>): 7.70 (1 H, d, *J* = 8.0 Hz), 4.24 (2 H, q, *J* = 7.1 Hz), 3.96 (2 H, dt, *J* = 11.9, 4.0 Hz), 3.48 (2 H, td, *J* = 11.3, 2.5 Hz), 3.33 (1 H, brs), 3.12–2.91 (2 H, m), 2.59–2.56 (2 H, m), 2.05 (2 H, d, *J* = 12.8 Hz), 1.79 (2 H, dt, *J* = 11.7, 5.9 Hz), 1.69–1.54 (6 H, m), 1.32 (3 H, t, *J* = 7.1 Hz) ppm. – <sup>13</sup>C NMR (125 MHz, CDCl<sub>3</sub>): 166.7, 161.9, 138.3, 120.0, 104.5, 66.6, 59.5, 53.2, 33.0, 32.1, 28.8, 28.7, 28.0, 26.9, 14.5 ppm. – IR: 3312, 3066, 2985, 2922, 2848, 2252, 2750, 2693, 1644, 1529, 1445, 1410, 1383, 1263, 1210, 1135, 1088, 1030, 906 cm<sup>-1</sup>. – HRMS: calcd for C<sub>17</sub>H<sub>25</sub>NO<sub>3</sub>S: 324.1628, found 324.1627 [M+H<sup>+</sup>].

### 3-Ethyl-3-(4-(nonylamino)phenyl)piperidine-2,6-dione (**69**)

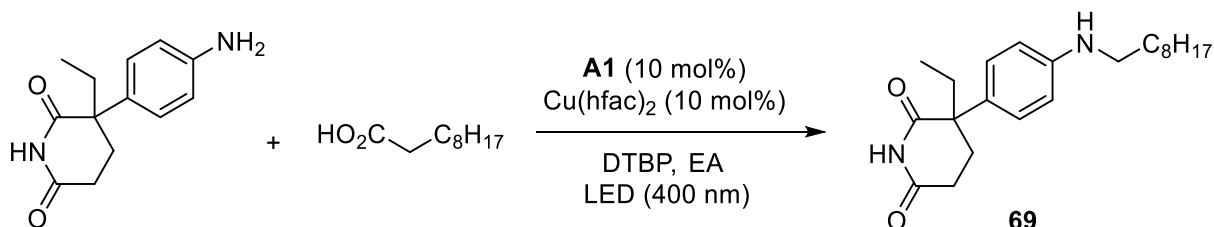

According to **GP1**, the reaction was carried out with 3-(4-aminophenyl)-3-ethylpiperidine-2,6-dione (70 mg, 0.3 mmol), decanoic acid (129 mg, 0.75 mmol, 2.5 equiv.), acridine **A1** (9 mg, 0.03 mmol, 10 mol%), Cu(hfac)<sub>2</sub> (14 mg, 0.03 mmol, 10 mol%), and DTBP (88 mg, 0.6 mmol, 2 equiv.) in ethyl acetate (4.5 mL). The reaction mixture was degassed using a stream of argon bubbled through a glass pipet reaching the bottom of the test-tube, while vigorous stirring was maintained for 3 min. The test-tube was capped and the reaction mixture was irradiated with LED light ( $\lambda = 400$  nm) while stirring for 12 h. The reaction mixture was then diluted with ethyl acetate (10 mL), extracted with a saturated solution of EDTA (3 mL). The organic layer was collected, dried over

anhydrous Na<sub>2</sub>SO<sub>4</sub>, concentrated under reduced pressure, and the remaining material was purified by flash chromatography on silica gel (hexane/ ethyl acetate 7 : 3 v/v) to give the amine product **69** (61 mg, 57%) as a pale yellow solid.

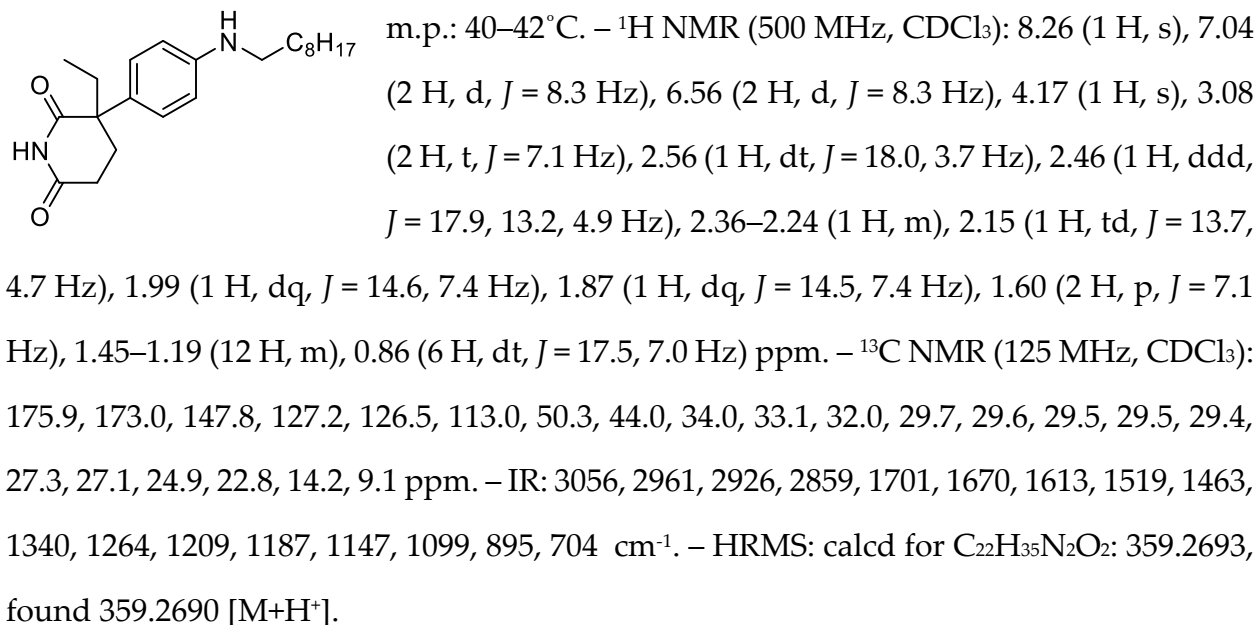

### 3-Ethyl-3-(4-(pentylamino)phenyl)piperidine-2,6-dione (**70**)

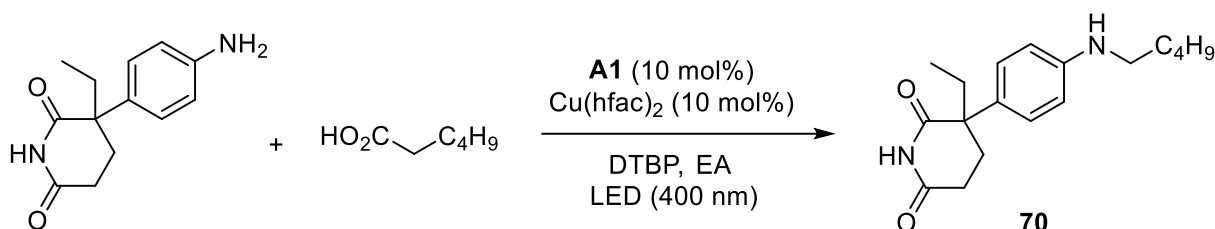

According to **GP1**, the reaction was carried out with 3-(4-aminophenyl)-3-ethylpiperidine-2,6-dione (70 mg, 0.3 mmol), hexanoic acid (87 mg, 0.75 mmol, 2.5 equiv.), acridine **A1** (9 mg, 0.03 mmol, 10 mol%), Cu(hfac)<sub>2</sub> (14 mg, 0.03 mmol, 10 mol%), and DTBP (88 mg, 0.6 mmol, 2 equiv.) in ethyl acetate (4.5 mL). The reaction mixture was degassed using a stream of argon bubbled through a glass pipet reaching the bottom of the test-tube, while vigorous stirring was maintained for 3 min. The test-tube was capped and the reaction mixture was irradiated with LED light ( $\lambda = 400$  nm) while stirring for 36 h. The reaction mixture was then diluted with ethyl acetate (10 mL), extracted with a

saturated solution of EDTA (3 mL). The organic layer was collected, dried over anhydrous Na<sub>2</sub>SO<sub>4</sub>, concentrated under reduced pressure, and the remaining material was purified by flash chromatography on silica gel (hexane/ ethyl acetate 7 : 3 v/v) to give the amine product **70** (69 mg, 76%) as a pale yellow solid.

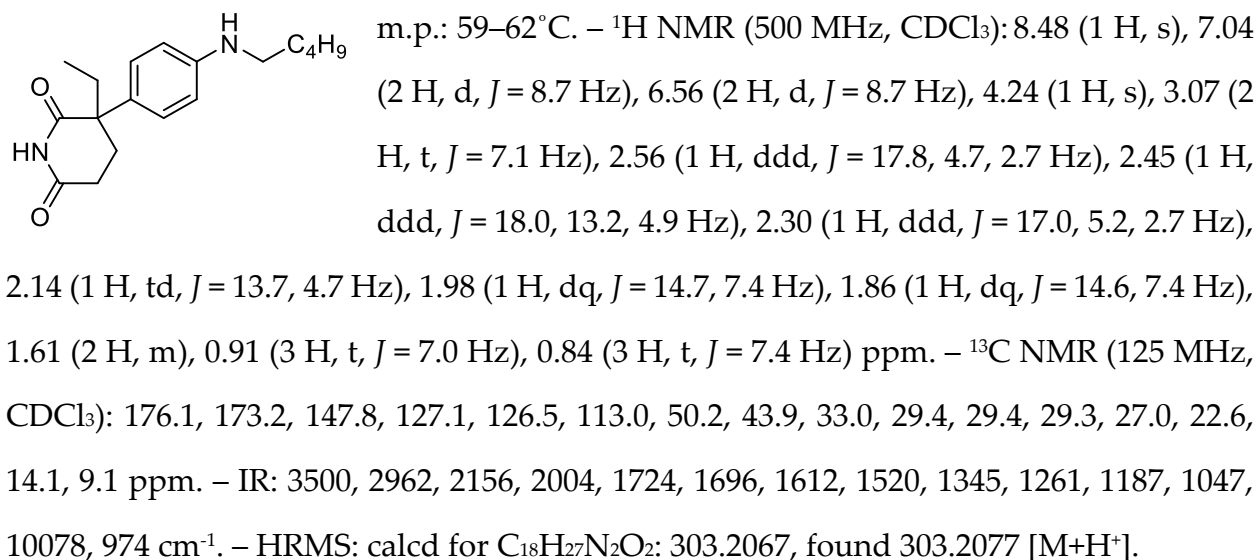

### 3-Ethyl-3-(4-(methylamino)phenyl)piperidine-2,6-dione (**71**)<sup>[30]</sup>

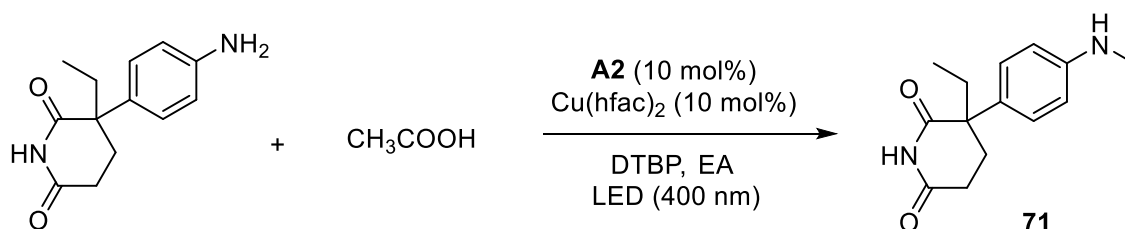

According to **GP1**, the reaction was carried out with 3-(4-aminophenyl)-3-ethylpiperidine-2,6-dione (70 mg, 0.3 mmol), acetic acid (90 mg, 1.5 mmol, 5.0 equiv.), acridine **A2** (9 mg, 0.03 mmol, 10 mol%), Cu(hfac)<sub>2</sub> (14 mg, 0.03 mmol, 10 mol%), and DTBP (88 mg, 0.6 mmol, 2 equiv.) in ethyl acetate (1.5 mL). The reaction mixture was degassed using a stream of argon bubbled through a glass pipet reaching the bottom of the test-tube, while vigorous stirring was maintained for 3 min. The test-tube was capped and the reaction mixture was irradiated with LED light ( $\lambda = 400$  nm) while stirring for 24 h. The reaction mixture was then diluted with ethyl acetate (10 mL), extracted with a

saturated solution of EDTA (3 mL). The organic layer was collected, dried over anhydrous Na<sub>2</sub>SO<sub>4</sub>, concentrated under reduced pressure, and the remaining material was purified by flash chromatography on silica gel (hexane/ ethyl acetate 7:3 v/v) to give the amine product **71** (52 mg, 68%) as a colorless liquid.

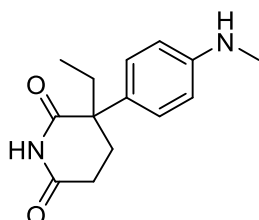

<sup>1</sup>H NMR (500 MHz, CDCl<sub>3</sub>): 7.89 (1 H, d, *J* = 18.0 Hz), 7.13–7.05 (2 H, m), 6.65–6.55 (2 H, m), 2.63–2.55 (1 H, m), 2.49 (1 H, ddd, *J* = 17.9, 13.3, 5.0 Hz), 2.34 (1 H, ddd, *J* = 14.2, 5.0, 2.7 Hz), 2.18 (1 H, ddd, *J* = 14.2, 13.3, 4.6 Hz), 2.02 (1 H, dq, *J* = 14.8, 7.4 Hz), 1.90 (1 H, dq, *J* = 14.6, 7.4 Hz), 0.88 (3 H, t, *J* = 7.4 Hz) ppm. – <sup>13</sup>C NMR (125 MHz, CDCl<sub>3</sub>): 175.8, 172.7, 148.6, 127.2, 126.8, 112.8, 50.4, 33.1, 30.8, 29.5, 27.1, 9.2 ppm. – IR: 3413, 3208, 3093, 2970, 2933, 2882, 2816, 2254, 1697, 1614, 1522, 1484, 1457, 1348, 1308, 1264, 1201, 1186, 1158, 1111, 1048 cm<sup>-1</sup>.

### 3-(4-(Cyclobutylamino)phenyl)-3-ethylpiperidine-2,6-dione (**72**)

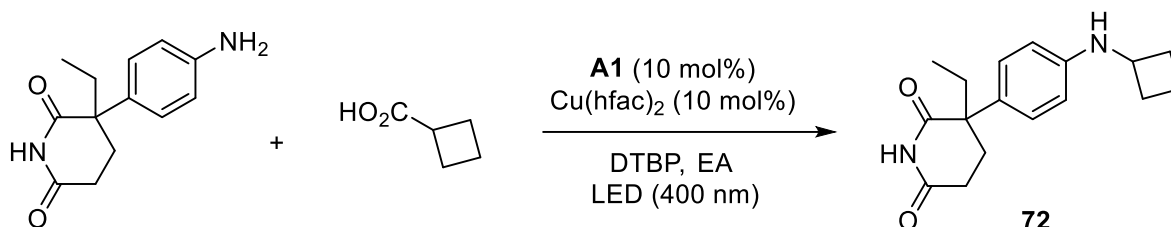

According to **GP1**, the reaction was carried out with 3-(4-aminophenyl)-3-ethylpiperidine-2,6-dione (70 mg, 0.3 mmol), cyclobutanecarboxylic acid (75 mg, 0.75 mmol, 2.5 equiv.), acridine **A1** (9 mg, 0.03 mmol, 10 mol%), Cu(hfac)<sub>2</sub> (14 mg, 0.03 mmol, 10 mol%), and DTBP (88 mg, 0.6 mmol, 2 equiv.) in ethyl acetate (4.5 mL). The reaction mixture was degassed using a stream of argon bubbled through a glass pipet reaching the bottom of the test-tube, while vigorous stirring was maintained for 3 min. The test-tube was capped and the reaction mixture was irradiated with LED light ( $\lambda = 400$  nm) while stirring for 36 h. The reaction mixture was then diluted with ethyl acetate (10 mL), extracted with a saturated solution of EDTA (3 mL). The organic layer was collected, dried over

anhydrous Na<sub>2</sub>SO<sub>4</sub>, concentrated under reduced pressure, and the remaining material was purified by flash chromatography on silica gel (hexane/ ethyl acetate 7:3 v/v) to give the amine product **72** (46 mg, 54%) as a colorless liquid.

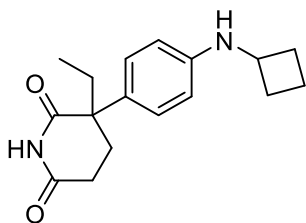

<sup>1</sup>H NMR (500 MHz, CDCl<sub>3</sub>): 8.30–7.99 (1 H, m), 7.02 (2 H, d, *J* = 8.4 Hz), 6.50 (2 H, d, *J* = 8.3 Hz), 3.88 (2 H, p, *J* = 7.4 Hz), 2.56 (1 H, dt, *J* = 17.9, 3.6 Hz), 2.51–2.35 (3 H, m), 2.29 (1 H, ddd, *J* = 14.2, 5.0, 2.8 Hz), 2.14 (1 H, td, *J* = 13.8, 4.6 Hz), 1.98 (1 H, dq, *J* = 14.7, 7.4 Hz), 1.90–1.72 (5 H, m), 0.84 (3 H, t, *J* = 7.4 Hz) ppm.

– <sup>13</sup>C NMR (125 MHz, CDCl<sub>3</sub>): 176.0, 173.1, 146.6, 127.2, 126.7, 113.3, 50.3, 49.0, 33.1, 31.3, 29.5, 27.1, 15.4, 9.1 ppm. – IR: 3383, 3212, 2967, 2922, 2878, 1693, 1611, 1516, 1457, 1348, 1306, 1255, 1190, 1145, 1047, 959 cm<sup>-1</sup>. – HRMS: calcd for C<sub>17</sub>H<sub>23</sub>N<sub>2</sub>O<sub>2</sub>: 287.1754, found 287.1760 [M+H<sup>+</sup>].

**(7S\*,8R\*)-15-((4-methoxyphenyl)(methyl)amino)pentadecane-1,7,8-triyl triacetate (73)**

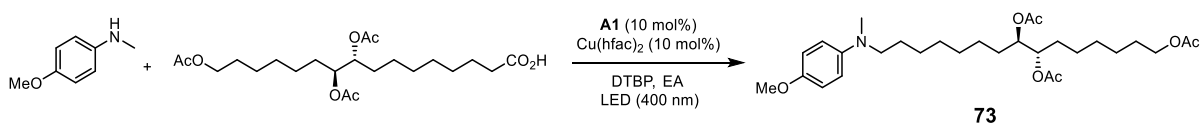

According to **GP1**, the reaction was carried out with 4-methoxy-*N*-methylaniline (57 mg, 0.375 mmol, 2.5 equiv.), (9*R*\*,10*S*\*)-9,10,16-triacetoxylhexadecanoic acid (65 mg, 0.15 mmol), acridine **A1** (5 mg, 0.015 mmol, 10 mol%), Cu(hfac)<sub>2</sub> (7 mg, 0.015 mmol, 10 mol%), and DTBP (44 mg, 0.3 mmol, 2 equiv.) in ethyl acetate (3 mL). The reaction mixture was degassed using a stream of argon bubbled through a glass pipet reaching the bottom of the test-tube, while vigorous stirring was maintained for 3 min. The test-tube was capped and the reaction mixture was irradiated with LED light ( $\lambda = 400$  nm) while stirring for 36 h. The reaction mixture was then diluted with ethyl acetate (10 mL), extracted with a saturated solution of EDTA (3 mL). The organic layer was collected, dried over anhydrous Na<sub>2</sub>SO<sub>4</sub>, concentrated under reduced pressure, and the remaining material

was purified by flash chromatography on silica gel (hexane/ ethyl acetate 9 : 1 v/v) to give the amine product **73** (55 mg, 70%) as a yellow liquid.

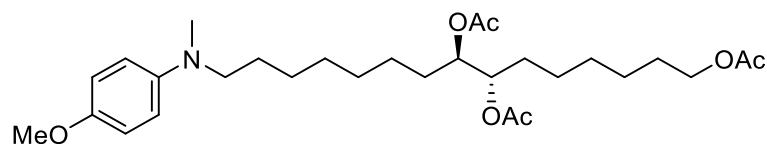

$^1\text{H}$  NMR (500 MHz,  $\text{CDCl}_3$ ): 6.87–6.79 (2 H, m), 6.73–6.66 (2 H, m), 4.98 (2 H, p,  $J = 3.9$  Hz), 4.03

(2 H, t,  $J = 6.7$  Hz), 3.75 (32 H, s), 3.18 (2 H, t,  $J = 7.6$  Hz), 2.83 (3 H, s), 2.06 (9 H, d,  $J = 19.3$  Hz), 1.54 (8 H, dq,  $J = 45.6, 7.0$  Hz), 1.38–1.19 (14 H, m) ppm. –  $^{13}\text{C}$  NMR (125 MHz,  $\text{CDCl}_3$ ): 171.3, 170.8, 151.6, 144.6, 114.9, 114.6, 73.9, 73.9, 64.6, 55.9, 54.1, 39.1, 30.9, 30.8, 29.5, 29.5, 29.1, 28.6, 27.2, 26.6, 25.9, 25.3, 25.2, 21.1, 21.1 ppm. – IR: 2931, 2856, 2836, 2802, 1734, 1512, 1369, 1226, 1201, 1038, 951, 814  $\text{cm}^{-1}$ . – HRMS: calcd for  $\text{C}_{29}\text{H}_{48}\text{NO}_7$ : 522.3425, found 522.3428  $[\text{M}+\text{H}^+]$ .

#### (Z)-N-(Heptadec-8-en-1-yl)-4-methyl-N-(p-tolyl)aniline (**74**)

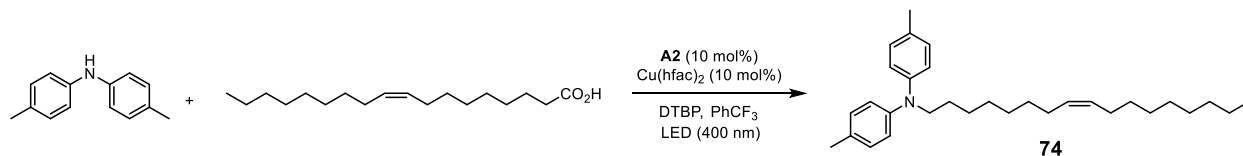

According to **GP2**, the reaction was carried out with di-*p*-tolylamine (148 mg, 0.75 mmol, 2.5 equiv.), oleic acid (85 mg, 0.3 mmol), acridine **A2** (9 mg, 0.03 mmol, 10 mol%),  $\text{Cu}(\text{hfac})_2$  (14 mg, 0.03 mmol, 10 mol%), and DTBP (88 mg, 0.6 mmol, 2 equiv.) in  $\text{PhCF}_3$  (4.5 mL). The reaction mixture was degassed using a stream of argon bubbled through a glass pipet reaching the bottom of the test-tube, while vigorous stirring was maintained for 3 min. The test-tube was capped and the reaction mixture was irradiated with LED light ( $\lambda = 400$  nm) while stirring for 24 h. The reaction mixture was then diluted with ethyl acetate (10 mL), extracted with a saturated solution of EDTA (3 mL). The organic layer was collected, dried over anhydrous  $\text{Na}_2\text{SO}_4$ , concentrated under reduced pressure, and the remaining material was purified by flash chromatography on silica gel (hexane/ ethyl acetate 95 : 5 v/v) to give the amine product **74** (101 mg, 78%) as a colorless liquid.

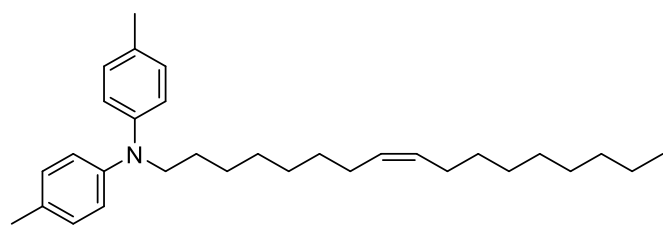

$^1\text{H}$  NMR (500 MHz,  $\text{CDCl}_3$ ): 7.16–7.02 (4 H, m), 6.90 (4 H, dd,  $J = 8.4, 2.2$  Hz), 5.38 (2 H, dt,  $J = 7.5, 4.8$  Hz), 3.70–3.59 (2 H, m), 2.32 (6 H, s), 2.04 (4 H, p,  $J = 5.2, 4.2$

Hz), 1.67 (2 H, t,  $J = 7.4$  Hz), 1.46–1.19 (20 H, m), 0.92 (3 H, td,  $J = 6.8, 2.1$  Hz) ppm. –  $^{13}\text{C}$  NMR (125 MHz,  $\text{CDCl}_3$ ): 146.2, 130.3, 130.1, 129.9, 129.9, 120.9, 52.6, 32.1, 29.9, 29.8, 29.8, 29.7, 29.51, 29.48, 29.4, 27.6, 27.4, 27.3, 27.2, 22.8, 20.8, 14.3 ppm. – IR: 3005, 2921, 2851, 1727, 1609, 1568, 1508, 1463, 1376, 1308, 1248, 1018  $\text{cm}^{-1}$ . – HRMS: calcd for  $\text{C}_{31}\text{H}_{48}\text{N}$ : 434.3781, found 434.3789  $[\text{M}+\text{H}^+]$ .

**(7*S*\*,8*R*\*)-15-(Bis(4-methoxyphenyl)amino)pentadecane-1,7,8-triol (75)**

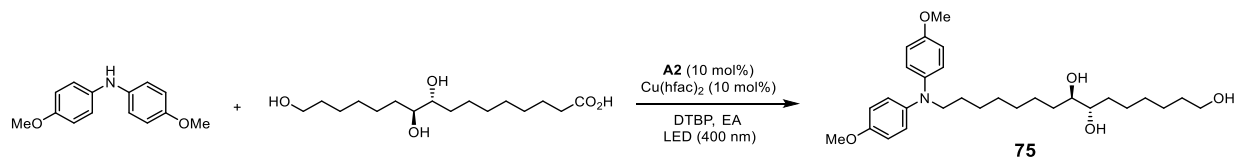

According to **GP2**, the reaction was carried out with bis(4-methoxyphenyl)amine (172 mg, 0.75 mmol, 2.5 equiv.), (+/-)-erythro-aleuritic acid (91 mg, 0.3 mmol), acridine **A2** (9 mg, 0.03 mmol, 10 mol%),  $\text{Cu}(\text{hfac})_2$  (14 mg, 0.03 mmol, 10 mol%), and DTBP (88 mg, 0.6 mmol, 2 equiv.) in ethyl acetate (4.5 mL). The reaction mixture was degassed using a stream of argon bubbled through a glass pipet reaching the bottom of the test-tube, while vigorous stirring was maintained for 3 min. The test-tube was capped and the reaction mixture was irradiated with LED light ( $\lambda = 400$  nm) while stirring for 36 h. The reaction mixture was then diluted with ethyl acetate (10 mL), extracted with a saturated solution of EDTA (3 mL). The organic layer was collected, dried over anhydrous  $\text{Na}_2\text{SO}_4$ , concentrated under reduced pressure, and the remaining material was purified by flash

chromatography on silica gel (hexane/ ethyl acetate 1:9 v/v) to give the amine product **75** (79 mg, 54%) as a red liquid.

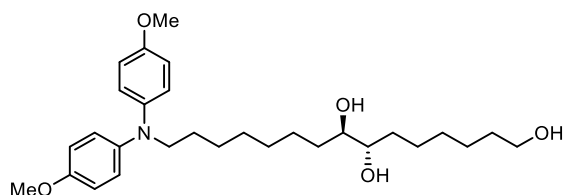

$^1\text{H}$  NMR (500 MHz,  $\text{CDCl}_3$ ): 6.86 (4 H, d,  $J = 9.0$  Hz), 6.81 (4 H, d,  $J = 9.0$  Hz), 3.77 (6 H, s), 3.63 (2 H, t,  $J = 6.5$  Hz), 3.54 (2 H, t,  $J = 7.6$  Hz), 3.47–3.31 (2 H, m), 2.51–1.86 (3 H, m), 1.66–1.08 (22

H, m) ppm. –  $^{13}\text{C}$  NMR (125 MHz,  $\text{CDCl}_3$ ): 154.3, 142.7, 122.2, 114.7, 74.63, 74.59, 63.1, 55.8, 53.0, 33.7, 33.6, 32.8, 29.8, 29.6, 29.5, 27.7, 27.2, 25.8, 25.7, 25.6 ppm. – IR: 3332, 2927, 2852, 1729, 1504, 1463, 1239, 1179, 1036  $\text{cm}^{-1}$ . – HRMS: calcd for  $\text{C}_{29}\text{H}_{46}\text{NO}_5$ : 488.3371, found 488.3371  $[\text{M}+\text{H}^+]$ .

**(3*R*,5*S*,7*R*,8*R*,9*S*,10*S*,13*R*,14*S*,17*R*)-10,13-Dimethyl-17-((*R*)-4-((4-(4,4,5,5-tetramethyl-1,3,2-dioxaborolan-2-yl)phenyl)amino)butan-2-yl)hexadecahydro-1*H*-cyclopenta[*a*]phenanthrene-3,7-diol (**76**)**

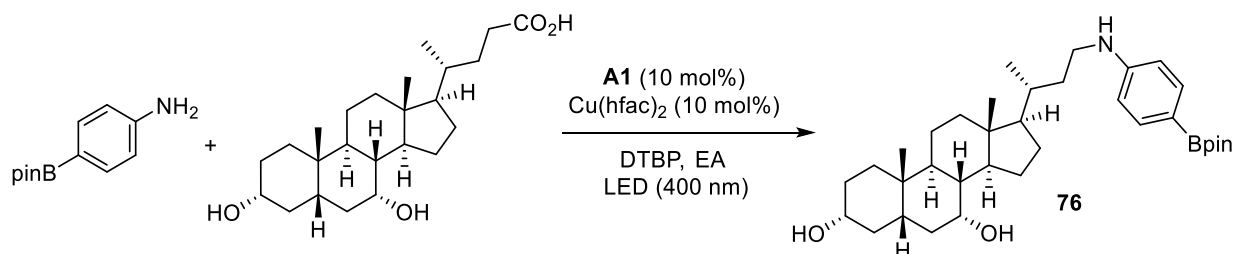

According to **GP2**, the reaction was carried out with 4-(4,4,5,5-tetramethyl-1,3,2-dioxaborolan-2-yl)aniline (82 mg, 0.375 mmol, 2.5 mmol), chenodeoxycholic acid (60 mg, 0.15 mmol), acridine **A1** (5 mg, 0.015 mmol, 10 mol%),  $\text{Cu}(\text{hfac})_2$  (7 mg, 0.015 mmol, 10 mol%), and DTBP (44 mg, 0.3 mmol, 2 equiv.) in ethyl acetate (4.5 mL). The reaction mixture was degassed using a stream of argon bubbled through a glass pipet reaching the bottom of the test-tube, while vigorous stirring was maintained for 3 min. The test-tube was capped and the reaction mixture was irradiated with LED light ( $\lambda = 400$  nm) while stirring for 36 h. The reaction mixture was then diluted with ethyl acetate (10 mL),



extracted with a saturated solution of EDTA (3 mL). The organic layer was collected, dried over anhydrous Na<sub>2</sub>SO<sub>4</sub>, concentrated under reduced pressure, and the remaining material was purified by flash chromatography on silica gel (hexane/ ethyl acetate 3 : 2 v/v) to give the amine product **76** (55 mg, 71%) as a colorless solid .

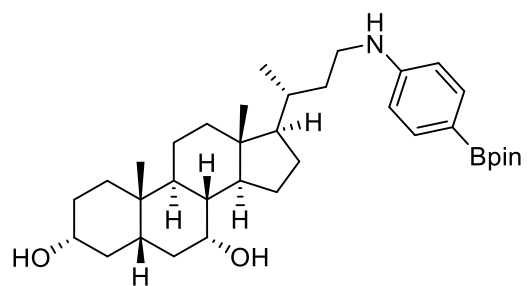

m.p.: 88–90°C. –  $[\alpha]_D^{23} = +12.6$  (c 0.23, CHCl<sub>3</sub>). – <sup>1</sup>H NMR (500 MHz, CDCl<sub>3</sub>): 7.62 (2 H, d, *J* = 8.0 Hz), 6.56 (2 H, d, *J* = 8.0 Hz), 3.85 (1 H, d, *J* = 3.6 Hz), 3.46 (1 H, tt, *J* = 11.3, 4.5 Hz), 3.19 (1 H, ddd, *J* = 12.0, 9.5, 4.9 Hz), 3.06 (1 H, ddd, *J* = 12.0, 9.1, 6.6

Hz), 2.20 (1 H, q, *J* = 12.4 Hz), 2.03–1.77 (5 H, m), 1.77–1.58 (4 H, m), 1.57–1.45 (3 H, m), 1.44–1.08 (23 H, m), 1.05–0.81 (9 H, m), 0.67 (3 H, s) ppm. – <sup>13</sup>C NMR (125 MHz, CDCl<sub>3</sub>): 151.1, 136.5, 111.8, 83.3, 72.2, 68.7, 56.3, 50.6, 42.9, 41.6, 41.1, 40.0, 39.8, 39.6, 35.8, 35.5, 35.2, 34.8, 34.8, 34.7, 34.3, 33.0, 31.7, 30.8, 28.6, 25.4, 25.0, 23.9, 22.9, 22.8, 20.8, 20.7, 19.0, 14.3, 11.9 ppm. – <sup>11</sup>B NMR (160 MHz, CDCl<sub>3</sub>): 31.1 ppm. – IR: 3069, 2985, 2931, 2868, 1605, 1484, 1400, 1359, 1327, 1264, 1199, 1143, 1077, 896, 736 cm<sup>-1</sup>. – HRMS: calcd for C<sub>35</sub>H<sub>56</sub>BNO<sub>4</sub>K: 604.3934, found 604.3923 [M+K<sup>+</sup>].

**(3*R*,5*R*,8*R*,9*S*,10*S*,12*S*,13*R*,14*S*,17*R*)-17-((*R*)-4-((4-Methoxyphenyl)amino)butan-2-yl)-10,13-dimethylhexadecahydro-1*H*-cyclopenta[*a*]phenanthrene-3,12-diol (**77**)**

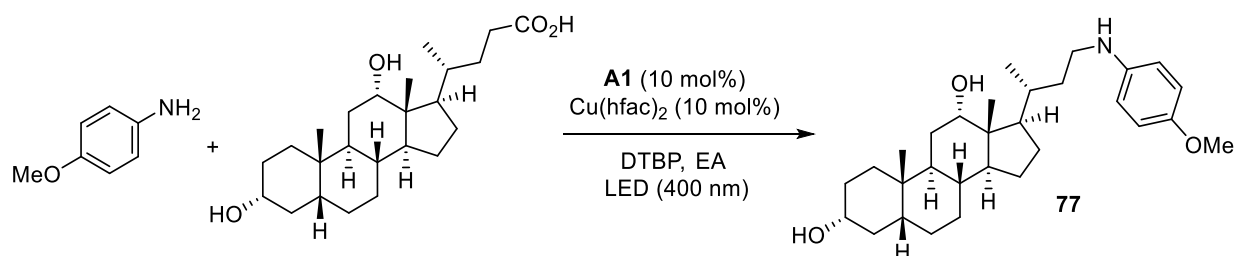

According to **GP2**, the reaction was carried out with *p*-anisidine (46 mg, 0.375 mmol, 2.5 mmol), deoxycholic acid (60 mg, 0.15 mmol), acridine **A1** (5 mg, 0.015 mmol, 10 mol%),

Cu(hfac)<sub>2</sub> (7 mg, 0.015 mmol, 10 mol%), and DTBP (44 mg, 0.3 mmol, 2 equiv.) in ethyl acetate (4.5 mL). The reaction mixture was degassed using a stream of argon bubbled through a glass pipet reaching the bottom of the test-tube, while vigorous stirring was maintained for 3 min. The test-tube was capped and the reaction mixture was irradiated with LED light ( $\lambda = 400$  nm) while stirring for 36 h. The reaction mixture was then diluted with ethyl acetate (10 mL), extracted with a saturated solution of EDTA (3 mL). The organic layer was collected, dried over anhydrous Na<sub>2</sub>SO<sub>4</sub>, concentrated under reduced pressure, and the remaining material was purified by flash chromatography on silica gel (hexane/ ethyl acetate 2 : 3 v/v) to give the amine product **77** (54 mg, 75%) as a brown liquid.

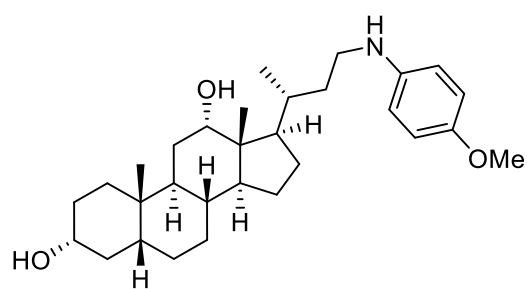

$[\alpha]_D^{23} = +9.4$  (c 0.16, CHCl<sub>3</sub>). – <sup>1</sup>H NMR (500 MHz, CDCl<sub>3</sub>): 6.78 (2 H, d,  $J = 8.8$  Hz), 6.64–6.52 (2 H, m), 3.84 (1 H, d,  $J = 3.3$  Hz), 3.74 (3 H, s), 3.52–3.37 (1 H, m), 3.11 (1 H, td,  $J = 10.6, 10.0, 4.8$  Hz), 2.99 (1 H, ddd,  $J = 11.7, 9.2, 6.5$  Hz), 2.49–1.77 (8 H, m), 1.77–1.58 (4 H, m), 1.58–1.44 (4 H, m), 1.44–1.05 (10 H, m), 1.04–0.93 (3 H, m), 0.89 (4 H, d,  $J = 11.4$  Hz), 0.67 (3 H, s) ppm. – <sup>13</sup>C NMR (125 MHz, CDCl<sub>3</sub>): 152.1, 143.0, 115.0, 114.2, 72.1, 68.6, 56.3, 56.2, 56.0, 50.6, 42.9, 42.6, 41.6, 40.0, 39.8, 39.5, 36.1, 35.5, 35.2, 34.8, 34.7, 34.3, 33.0, 31.7, 30.8, 28.5, 25.4, 23.8, 22.9, 22.8, 20.7, 19.0, 14.3, 11.9 ppm. – IR: 3392, 2985, 2926, 2863, 2833, 1748, 1715, 1512, 1464, 1336, 1233, 1175, 1078, 1039, 977, 774 cm<sup>-1</sup>. – HRMS: calcd for C<sub>30</sub>H<sub>48</sub>NO<sub>3</sub>: 470.3629, found 470.3621 [M+H<sup>+</sup>].

**(3*R*,5*R*,8*R*,9*S*,10*S*,12*S*,13*R*,14*S*,17*R*)-10,13-Dimethyl-17-((*R*)-4-((3-(methylthio)phenyl)amino)butan-2-yl)hexadecahydro-1*H*-cyclopenta[*a*]phenanthrene-3,12-diol (78)**

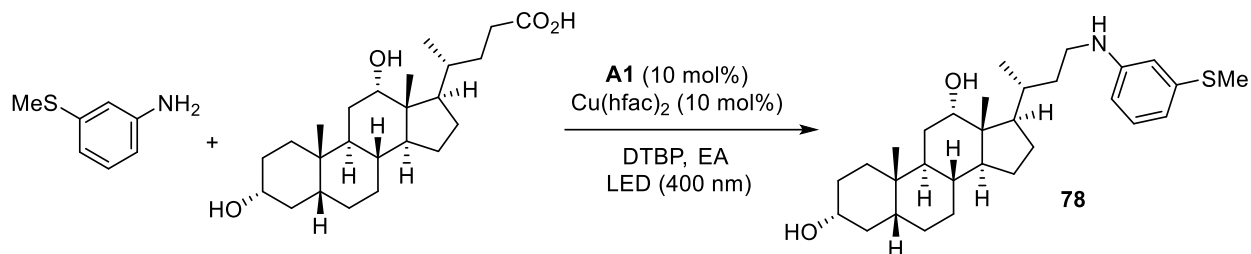

According to **GP2**, the reaction was carried out with 3-(methylthio)aniline (52 mg, 0.375 mmol, 2.5 mmol), deoxycholic acid (60 mg, 0.15 mmol), acridine **A1** (5 mg, 0.015 mmol, 10 mol%), Cu(hfac)<sub>2</sub> (7 mg, 0.015 mmol, 10 mol%), and DTBP (44 mg, 0.3 mmol, 2 equiv.) in ethyl acetate (4.5 mL). The reaction mixture was degassed using a stream of argon bubbled through a glass pipet reaching the bottom of the test-tube, while vigorous stirring was maintained for 3 min. The test-tube was capped and the reaction mixture was irradiated with LED light ( $\lambda = 400$  nm) while stirring for 36 h. The reaction mixture was then diluted with ethyl acetate (10 mL), extracted with a saturated solution of EDTA (3 mL). The organic layer was collected, dried over anhydrous Na<sub>2</sub>SO<sub>4</sub>, concentrated under reduced pressure, and the remaining material was purified by flash chromatography on silica gel (hexane/ ethyl acetate 7 : 3 v/v) to give the amine product **78** (49 mg, 68%) as a yellow solid.

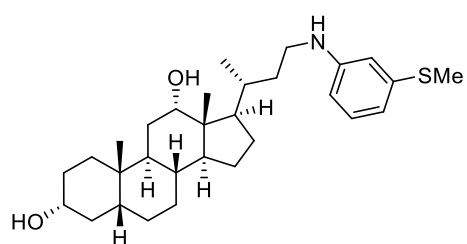

m.p.: 78– 80°C. –  $[\alpha]_{\text{D}}^{23} = + 21.7$  (c 0.28, CHCl<sub>3</sub>). – <sup>1</sup>H NMR (500 MHz, CDCl<sub>3</sub>): 7.08 (1 H, t,  $J = 7.8$  Hz), 6.59 (1 H, d,  $J = 7.8$  Hz), 6.50 (1 H, s), 6.38 (1 H, d,  $J = 8.2$  Hz), 4.01 (1 H, s), 3.62 (1 H, dq,  $J = 12.0, 6.9, 5.8$  Hz), 3.16 (1 H, ddd,  $J = 13.8, 10.0, 4.6$  Hz), 3.11–2.96 (1 H, m), 2.46 (3 H, s), 1.98–0.78 (32 H, m), 0.70 (3 H, s) ppm. – <sup>13</sup>C NMR (125 MHz, CDCl<sub>3</sub>): 149.0, 139.3, 129.7, 115.4, 110.8, 110.1, 73.3, 72.0, 48.5, 47.9, 46.7, 42.2, 41.5, 36.6, 36.2, 35.8, 35.3, 34.3, 34.0, 33.8, 30.7, 28.9, 27.9, 27.3, 26.3,

23.8, 23.3, 18.1, 16.0, 12.9 ppm. – IR: 3037, 2987, 2936, 2870, 1737, 1732, 1590, 1499, 1458, 1365, 1216, 1204, 1089, 1040, 1016  $\text{cm}^{-1}$ . – HRMS: calcd for  $\text{C}_{30}\text{H}_{48}\text{NSO}_2$ : 486.3390, found 486.3393  $[\text{M}+\text{H}^+]$ .

**(3*R*,5*S*,7*R*,8*R*,9*S*,10*S*,12*S*,13*R*,14*S*,17*R*)-10,13-Dimethyl-17-((*R*)-4-((3-(methylthio)phenyl)amino)butan-2-yl)hexadecahydro-1*H*-cyclopenta[*a*]phenanthrene-3,7,12-triol (79)**

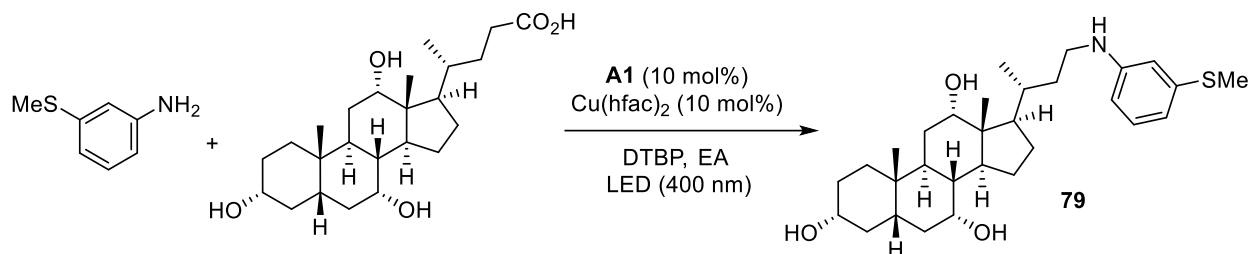

According to **GP2**, the reaction was carried out with 3-(methylthio)aniline (52 mg, 0.375 mmol, 2.5 mmol), cholic acid (61 mg, 0.15 mmol), acridine **A1** (5 mg, 0.015 mmol, 10 mol%),  $\text{Cu}(\text{hfac})_2$  (7 mg, 0.015 mmol, 10 mol%), and DTBP (44 mg, 0.3 mmol, 2 equiv.) in ethyl acetate (4.5 mL). The reaction mixture was degassed using a stream of argon bubbled through a glass pipet reaching the bottom of the test-tube, while vigorous stirring was maintained for 3 min. The test-tube was capped and the reaction mixture was irradiated with LED light ( $\lambda = 400 \text{ nm}$ ) while stirring for 36h. The reaction mixture was then diluted with ethyl acetate (10 mL), extracted with a saturated solution of EDTA (3 mL). The organic layer was collected, dried over anhydrous  $\text{Na}_2\text{SO}_4$ , concentrated under reduced pressure, and the remaining material was purified by flash chromatography on silica gel (hexane/ ethyl acetate 7 : 3 v/v) to give the amine product **79** (41 mg, 55%) as a colorless liquid.

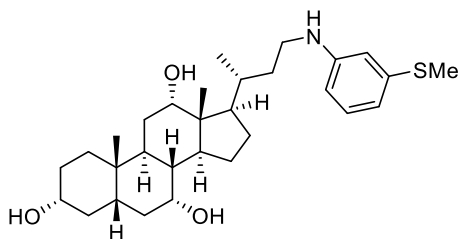

$[\alpha]_D^{23} = + 39.1$  (c 0.1,  $\text{CHCl}_3$ ). –  $^1\text{H NMR}$  (500 MHz,  $\text{CDCl}_3$ ): 7.06 (1 H, t,  $J = 7.9$  Hz), 6.57 (1 H, d,  $J = 7.7$  Hz), 6.49 (1 H, t,  $J = 2.1$  Hz), 6.38 (1 H, dd,  $J = 8.1, 2.2$  Hz), 3.97 (1 H, d,  $J = 3.1$  Hz), 3.88–3.77 (1 H, m), 3.61–2.96 (6 H, m), 2.44 (3 H, s), 2.28–2.12 (2 H, m), 1.98–1.18 (19 H, m), 1.06 (3 H, t,  $J = 10.5$  Hz), 1.00–0.79 (5 H, m), 0.68 (3 H, s) ppm. –  $^{13}\text{C NMR}$  (125 MHz,  $\text{CDCl}_3$ ): 149.0, 139.2, 129.7, 115.4, 110.8, 110.1, 73.2, 72.0, 68.6, 47.5, 46.6, 41.8, 41.6, 39.7, 39.6, 35.8, 35.4, 34.9, 34.8, 34.2, 31.7, 30.5, 28.3, 27.9, 26.5, 23.4, 22.8, 22.6, 18.1, 15.9, 14.3, 14.3, 12.6 ppm. – IR: 3390, 2972, 2924, 2864, 1591, 1510, 1478, 1437, 1264, 1077, 1041, 980, 908  $\text{cm}^{-1}$ . – HRMS: calcd for  $\text{C}_{30}\text{H}_{48}\text{NO}_3\text{S}$ : 502.3349, found 502.3346  $[\text{M}+\text{H}^+]$ .

**(3*R*,5*R*,8*R*,9*S*,10*S*,12*S*,13*R*,14*S*,17*R*)-10,13-Dimethyl-17-((*R*)-4-((4-(trifluoromethyl)phenyl)amino)butan-2-yl)hexadecahydro-1*H*-cyclopenta[*a*]phenanthrene-3,12-diyl diacetate (**80**)**

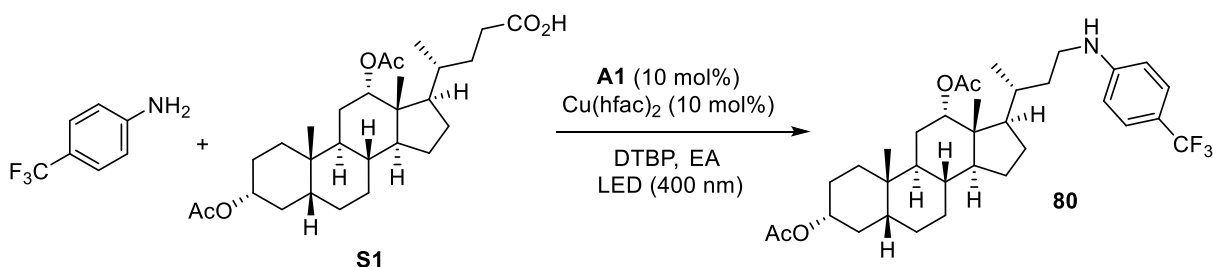

According to **GP2**, the reaction was carried out with 4-(trifluoromethyl)aniline (60 mg, 0.375 mmol, 2.5 mmol), acid **S1** (71 mg, 0.15 mmol), acridine **A1** (5 mg, 0.015 mmol, 10 mol%),  $\text{Cu}(\text{hfac})_2$  (7 mg, 0.015 mmol, 10 mol%), and DTBP (44 mg, 0.3 mmol, 2 equiv.) in ethyl acetate (4.5 mL). The reaction mixture was degassed using a stream of argon bubbled through a glass pipet reaching the bottom of the test-tube, while vigorous stirring was maintained for 3 min. The test-tube was capped and the reaction mixture

was irradiated with LED light ( $\lambda = 400$  nm) while stirring for 12 h. The reaction mixture was then diluted with ethyl acetate (10 mL), extracted with a saturated solution of EDTA (3 mL). The organic layer was collected, dried over anhydrous  $\text{Na}_2\text{SO}_4$ , concentrated under reduced pressure, and the remaining material was purified by flash chromatography on silica gel (hexane/ ethyl acetate 1 : 4 v/v) to give the amine product **80** (67 mg, 76%) as a colorless liquid.

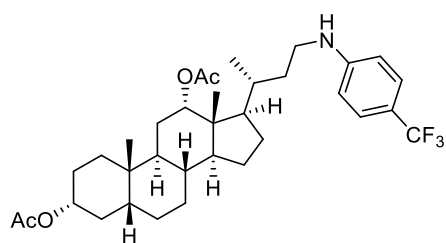

$[\alpha]_D^{23} = +7.1$  (c 0.3,  $\text{CHCl}_3$ ). –  $^1\text{H}$  NMR (500 MHz,  $\text{CDCl}_3$ ): 7.38 (2 H, d,  $J = 8.4$  Hz), 6.57 (2 H, d,  $J = 8.4$  Hz), 5.15–5.05 (1 H, m), 4.70 (1 H, tt,  $J = 11.4, 4.7$  Hz), 3.88 (1 H, s), 3.19 (1 H, td,  $J = 10.8, 9.5, 4.6$  Hz), 3.11–2.98 (1 H, m), 2.10 (3 H, s), 2.03 (3 H, s), 1.94–0.94 (24 H, m), 0.94–0.81 (6 H, m), 0.74 (3 H, s) ppm. –  $^{13}\text{C}$  NMR (125 MHz,  $\text{CDCl}_3$ ): 170.7, 170.6, 150.9, 126.6 (q,  $^3J_{\text{C-F}} = 3.9$  Hz), 125.0 (q,  $^1J_{\text{C-F}} = 270.5$  Hz), 118.5 (q,  $^2J_{\text{C-F}} = 32.6$  Hz), 111.8, 76.0, 74.3, 49.6, 48.1, 45.2, 42.0, 41.2, 35.8, 35.6, 34.9, 34.8, 34.7, 34.6, 34.2, 33.6, 32.4, 31.7, 27.7, 27.0, 26.8, 26.0, 25.8, 25.4, 23.6, 23.2, 22.8, 21.62, 21.55, 18.3, 14.3, 12.6 ppm. –  $^{19}\text{F}$  NMR (471 MHz,  $\text{CDCl}_3$ ): -60.95 (s) ppm. – IR: 3608, 3410, 3003, 2963, 2924, 1752, 1617, 1564, 1419, 1358, 1327, 1219, 1159, 1063, 1028  $\text{cm}^{-1}$ . – HRMS: calcd for  $\text{C}_{34}\text{H}_{49}\text{F}_3\text{NO}_4$ : 592.3608, found 592.3625 [ $\text{M}+\text{H}^+$ ].

**(3R,5S,7R,8R,9S,10S,13R,14S,17R)-17-((R)-4-(Bis(4-methoxyphenyl)amino)butan-2-yl)-10,13-dimethylhexadecahydro-1H-cyclopenta[*a*]phenanthrene-3,7-diol (**81**)**

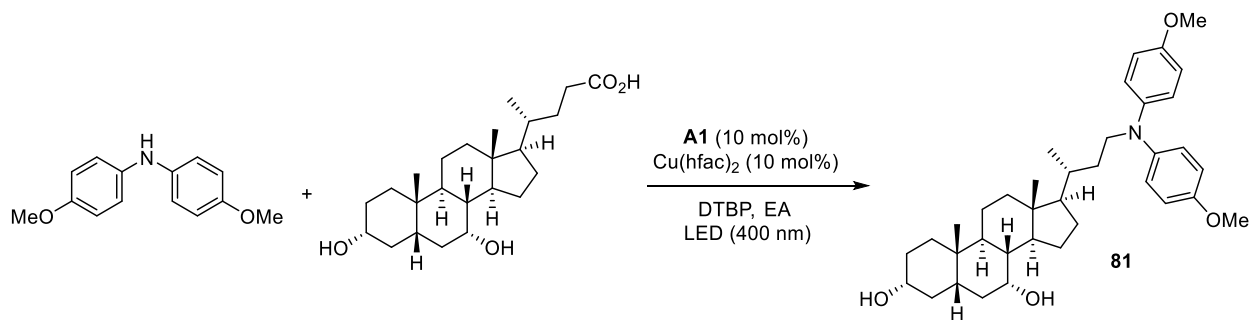

According to **GP2**, the reaction was carried out with bis(4-methoxyphenyl)amine (86 mg, 0.375 mmol, 2.5 equiv.), chenodeoxycholic acid (44 mg, 0.15 mmol), acridine **A1** (4 mg, 0.02 mmol, 10 mol%), Cu(hfac)<sub>2</sub> (7 mg, 0.02 mmol, 10 mol%), and DTBP (44 mg, 0.3 mmol, 2 equiv.) in ethyl acetate (3 mL). The reaction mixture was degassed using a stream of argon bubbled through a glass pipet reaching the bottom of the test-tube, while vigorous stirring was maintained for 3 min. The test-tube was capped and the reaction mixture was irradiated with LED light ( $\lambda = 400$  nm) while stirring for 24 h. The reaction mixture was then diluted with ethyl acetate (10 mL), extracted with a saturated solution of EDTA (3 mL). The organic layer was collected, dried over anhydrous Na<sub>2</sub>SO<sub>4</sub>, concentrated under reduced pressure, and the remaining material was purified by flash chromatography on silica gel (hexane/ ethyl acetate 1 : 9 v/v) to give the amine product **81** (85 mg, 99%) as a brown liquid.

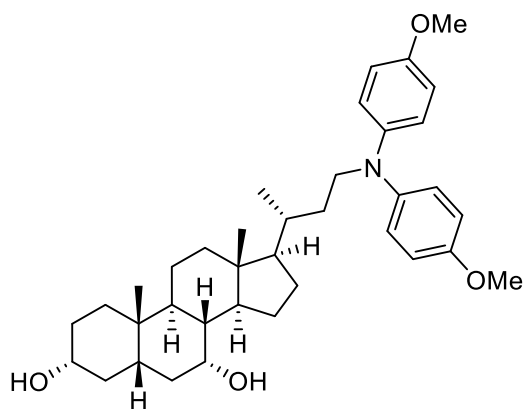

$[\alpha]_D^{23} = +6.2$  (c 0.4, CHCl<sub>3</sub>). – <sup>1</sup>H NMR (500 MHz, CDCl<sub>3</sub>): 6.96–6.70 (8 H, m), 3.90–3.72 (7 H, m), 3.55 (3 H, dtdd,  $J = 36.0, 15.9, 10.7, 5.6$  Hz), 2.20 (1 H, q,  $J = 12.6$  Hz), 2.08–0.73 (31 H, m), 0.65 (3 H, s) ppm. – <sup>13</sup>C NMR (125 MHz, CDCl<sub>3</sub>): 154.2, 142.6, 122.1, 114.7, 72.1, 68.6, 56.1, 55.7, 50.6, 50.5, 42.8, 41.6, 39.9, 39.8, 39.7, 39.5, 35.5, 35.2, 34.8, 34.7, 34.6, 34.4,

34.3, 33.4, 32.9, 31.7, 30.8, 29.8, 28.4, 25.4, 23.8, 22.9, 22.8, 20.8, 20.7, 20.3, 19.1, 18.7, 14.2, 11.8 ppm. – IR: 3408, 2926, 2863, 1504, 1463, 1375, 1238, 1179, 1115, 1077, 1037, 1000, 977 cm<sup>-1</sup>. – HRMS: calcd for C<sub>37</sub>H<sub>54</sub>NO<sub>4</sub>: 576.4047, found 576.4045 [M+H<sup>+</sup>].

**(3R,5S,7R,8R,9S,10S,12S,13R,14S,17R)-17-((R)-4-(Bis(4-methoxyphenyl)amino)butan-2-yl)-10,13-dimethylhexadecahydro-1H-cyclopenta[*a*]phenanthrene-3,7,12-triol (82)**

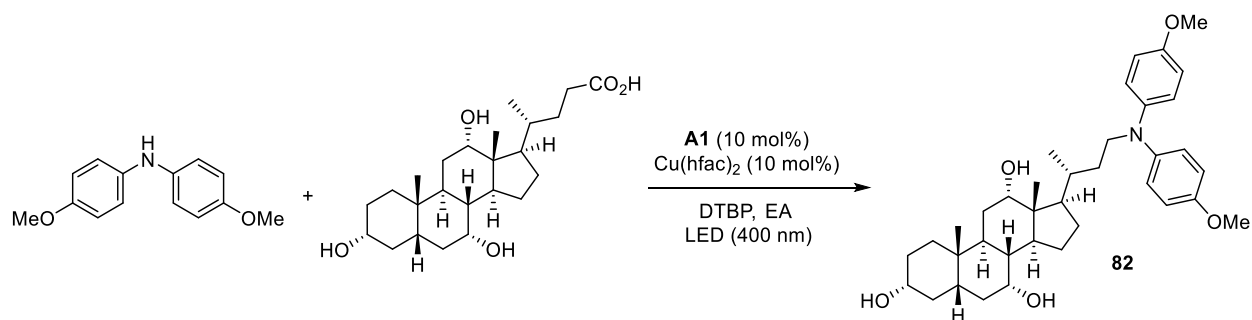

According to **GP2**, the reaction was carried out with bis(4-methoxyphenyl)amine (86 mg, 0.375 mmol, 2.5 equiv.), cholic acid (61 mg, 0.15 mmol), acridine **A1** (4 mg, 0.02 mmol, 10 mol%), Cu(hfac)<sub>2</sub> (7 mg, 0.02 mmol, 10 mol%), and DTBP (44 mg, 0.3 mmol, 2 equiv.) in ethyl acetate (3 mL). The reaction mixture was degassed using a stream of argon bubbled through a glass pipet reaching the bottom of the test-tube, while vigorous stirring was maintained for 3 min. The test-tube was capped and the reaction mixture was irradiated with LED light ( $\lambda = 400$  nm) while stirring for 24 h. The reaction mixture was then diluted with ethyl acetate (10 mL), extracted with a saturated solution of EDTA (3 mL). The organic layer was collected, dried over anhydrous Na<sub>2</sub>SO<sub>4</sub>, concentrated under reduced pressure, and the remaining material was purified by flash chromatography on silica gel (hexane/ ethyl acetate 1:9 v/v) to give the amine product **82** (74 mg, 83%) as a brown liquid.

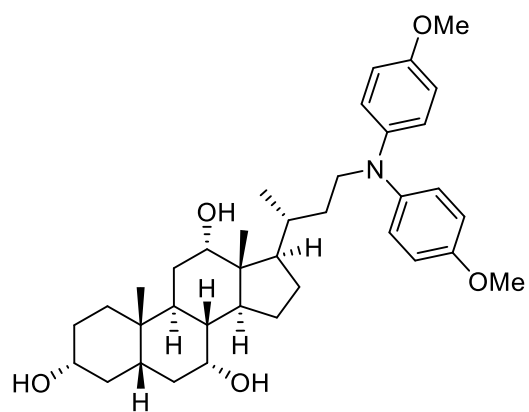

$[\alpha]_D^{23} = +10.4$  (c 0.4, CHCl<sub>3</sub>). – <sup>1</sup>H NMR (500 MHz, CDCl<sub>3</sub>): 6.95–6.71 (8 H, m), 3.95 (1 H, s), 3.77 (1 H, s), 3.70–3.60 (7 H, m), 3.58–3.47 (1 H, m), 3.41 (2 H, d,  $J = 11.2$  Hz), 2.95 (3 H, s), 2.27–2.12 (2 H, m), 1.97–0.77 (26 H, m), 0.65 (3 H, s) ppm. – <sup>13</sup>C NMR (125 MHz, CDCl<sub>3</sub>): 154.2, 142.7, 122.1, 114.7, 73.2, 72.0, 68.6, 55.7, 50.7, 47.4, 46.6, 41.8, 41.6, 39.6, 35.4,

34.9, 34.8, 34.3, 33.4, 30.5, 29.8, 28.3, 27.7, 26.5, 23.4, 22.6, 18.1, 12.5 ppm. – IR: 3383, 2925,



2857, 1615, 1504, 1463, 1375, 1239, 1179, 1076, 1037, 980  $\text{cm}^{-1}$ . – HRMS: calcd for  $\text{C}_{37}\text{H}_{54}\text{NO}_5$ : 592.3997, found 592.3997  $[\text{M}+\text{H}^+]$ .

**1-(Tetrahydro-2H-pyran-4-yl)-1H-indol-5-ol (83)**

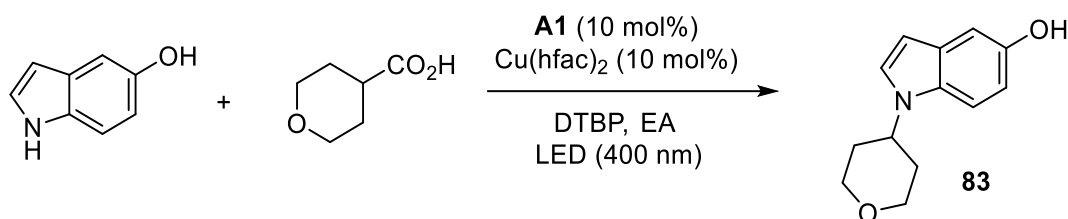

According to **GP1**, the reaction was carried out with 1H-indol-5-ol (20 mg, 0.15 mmol), tetrahydro-2H-pyran-4-carboxylic acid (59 mg, 0.45 mmol, 3 equiv.), acridine **A1** (4 mg, 0.02 mmol, 10 mol%), Cu(hfac)<sub>2</sub> (7 mg, 0.02 mmol, 10 mol%), and DTBP (44 mg, 0.3 mmol, 2 equiv.) in chlorobenzene (3 mL). The reaction mixture was degassed using a stream of argon bubbled through a glass pipet reaching the bottom of the test-tube, while vigorous stirring was maintained for 3 min. The test-tube was capped and the reaction mixture was irradiated with LED light ( $\lambda = 400 \text{ nm}$ ) while stirring for 24 h. The reaction mixture was then diluted with ethyl acetate (10 mL), extracted with a saturated solution of EDTA (3 mL). The organic layer was collected, dried over anhydrous  $\text{Na}_2\text{SO}_4$ , concentrated under reduced pressure, and the remaining material was purified by flash chromatography on silica gel (hexane/ ethyl acetate 4:1 v/v) to give the amine product **83** (20 mg, 61%) as a colorless solid.

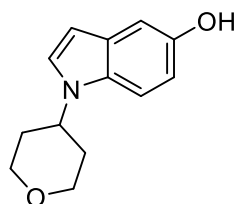

m.p.: 90–95°C. – <sup>1</sup>H NMR (500 MHz, CD<sub>3</sub>OD): 7.36–7.18 (2 H, m), 6.95 (1 H, d,  $J = 2.0 \text{ Hz}$ ), 6.74 (1 H, dd,  $J = 8.8, 2.1 \text{ Hz}$ ), 6.36–6.24 (1 H, m), 4.48 (1 H, td,  $J = 11.7, 5.4 \text{ Hz}$ ), 4.09 (2 H, d,  $J = 11.7 \text{ Hz}$ ), 3.65 (2 H, ddd,  $J = 14.7, 8.5, 2.8 \text{ Hz}$ ), 2.16–1.87 (4 H, m) ppm. – <sup>13</sup>C NMR (125 MHz,

CD<sub>3</sub>OD): 151.6, 132.1, 130.8, 125.5, 112.2, 110.8, 105.83, 105.75, 101.5, 68.4, 53.3, 34.5 ppm. – IR: 3326, 2874, 2498, 1666, 1606, 1503, 1478, 1456, 1385, 1332, 1308, 1258, 1230, 1210, 1151,

1130, 1088, 1055, 1008, 913  $\text{cm}^{-1}$ . – HRMS: calcd for  $\text{C}_{13}\text{H}_{16}\text{NO}_2$ : 218.1176, found 218.1179 [M+H<sup>+</sup>].

**4-Chloro-N-(methyl-*d*<sub>3</sub>)aniline (85)**<sup>[31]</sup>

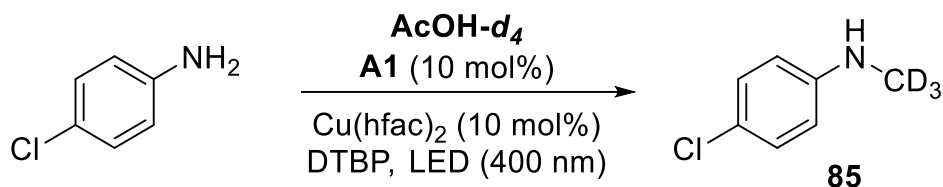

According to **GP1**, the reaction was carried out with 4-chloroaniline (38 mg, 0.3 mmol), acetic acid-*d*<sub>4</sub> (96 mg, 1.5 mmol, 5.0 equiv.), acridine **A1** (9 mg, 0.03 mmol, 10 mol%),  $\text{Cu}(\text{hfac})_2$  (14 mg, 0.03 mmol, 10 mol%), and DTBP (88 mg, 0.6 mmol, 2 equiv.) in ethyl acetate (1.5 mL). The reaction mixture was degassed using a stream of argon bubbled through a glass pipet reaching the bottom of the test-tube, while vigorous stirring was maintained for 3 min. The test-tube was capped and the reaction mixture was irradiated with LED light ( $\lambda = 400 \text{ nm}$ ) while stirring for 12 h. The reaction mixture was then diluted with ethyl acetate (10 mL), extracted with a saturated solution of EDTA (3 mL). The organic layer was collected, dried over anhydrous  $\text{Na}_2\text{SO}_4$ , concentrated under reduced pressure, and the remaining material was purified by flash chromatography on silica gel (hexane/ ethyl acetate 95 : 5 v/v) to give the amine product **85** (31 mg, 72%) as a colorless liquid.

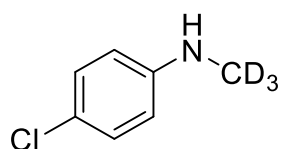

<sup>1</sup>H NMR (500 MHz,  $\text{CDCl}_3$ ): 7.17–7.09 (2 H, m), 6.58–6.46 (2 H, m), 3.67 (1 H, brs) ppm. – <sup>13</sup>C NMR (125 MHz,  $\text{CDCl}_3$ ): 148.0, 129.1, 121.9, 113.6 ppm. – <sup>2</sup>H NMR (77 MHz,  $\text{CDCl}_3$ ): 2.79 (3 H, s) ppm. – IR: 3418, 2810, 2153, 1620, 1520, 1416, 1403, 1357, 1326, 1102, 997  $\text{cm}^{-1}$ .

### *N*-(Methyl-*d*<sub>3</sub>)-4-(trifluoromethyl)aniline (**86**)

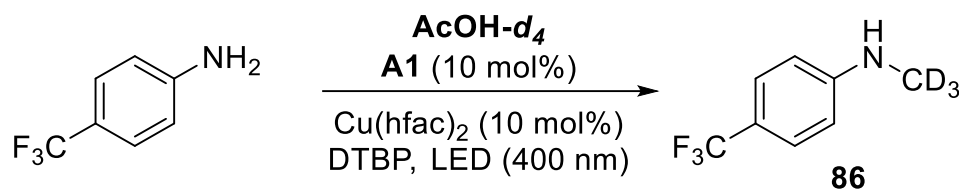

According to **GP1**, the reaction was carried out with 4-(trifluoromethyl)aniline (48 mg, 0.3 mmol), acetic acid-*d*<sub>4</sub> (96 mg, 1.5 mmol, 5.0 equiv.), acridine **A1** (9 mg, 0.03 mmol, 10 mol%), Cu(hfac)<sub>2</sub> (14 mg, 0.03 mmol, 10 mol%), and DTBP (88 mg, 0.6 mmol, 2 equiv.) in ethyl acetate (1.5 mL). The reaction mixture was degassed using a stream of argon bubbled through a glass pipet reaching the bottom of the test-tube, while vigorous stirring was maintained for 3 min. The test-tube was capped and the reaction mixture was irradiated with LED light ( $\lambda = 400$  nm) while stirring for 12 h. The reaction mixture was then diluted with ethyl acetate (10 mL), extracted with a saturated solution of EDTA (3 mL). The organic layer was collected, dried over anhydrous Na<sub>2</sub>SO<sub>4</sub>, concentrated under reduced pressure, and the remaining material was purified by flash chromatography on silica gel (hexane/ ethyl acetate 95 : 5 v/v) to give the amine product **86** (33 mg, 62%) as a colorless liquid.

<sup>1</sup>H NMR (500 MHz, CDCl<sub>3</sub>): 7.41 (2 H, d, *J* = 8.4 Hz), 6.60 (2 H, d, *J* = 8.5 Hz), 3.99 (1 H, brs) ppm. – <sup>13</sup>C NMR (125 MHz, CDCl<sub>3</sub>): 126.7 (*q*, <sup>3</sup>*J*<sub>C-F</sub> = 3.7 Hz), 125.2 (*q*, <sup>1</sup>*J*<sub>C-F</sub> = 269.9 Hz), 118.8 (*q*, <sup>2</sup>*J*<sub>C-F</sub> = 32.6 Hz), 111.6, 29.9 ppm. – <sup>2</sup>H NMR (77 MHz, CDCl<sub>3</sub>): 2.85 (3 H, s) ppm. – <sup>19</sup>F NMR (471 MHz, CDCl<sub>3</sub>): -61.0 (s) ppm. – IR: 3420, 2919, 2201, 2069, 1730, 1617, 1535, 1509, 1432, 1410, 1327, 1188, 1159, 1113, 1085, 938 cm<sup>-1</sup>. – HRMS: calcd for C<sub>8</sub>H<sub>6</sub>D<sub>3</sub>F<sub>3</sub>N: 179.0870, found 179.0877 [M+H<sup>+</sup>].

### *N*-(Methyl-*d*<sub>3</sub>)-3-(methylsulfonyl)aniline (**87**)

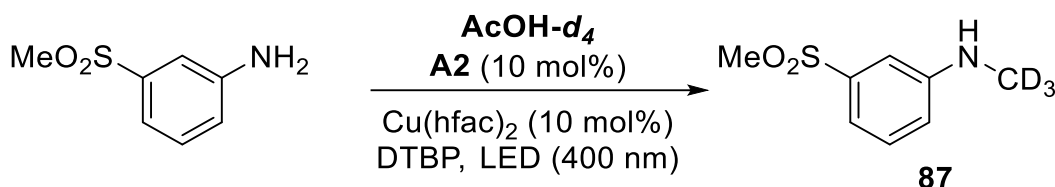

According to **GP1**, the reaction was carried out with 3-(methylsulfonyl)aniline (51 mg, 0.3 mmol), acetic acid-*d*<sub>4</sub> (96 mg, 1.5 mmol, 5.0 equiv.), acridine **A2** (9 mg, 0.03 mmol, 10 mol%), Cu(hfac)<sub>2</sub> (14 mg, 0.03 mmol, 10 mol%), and DTBP (88 mg, 0.6 mmol, 2 equiv.) in ethyl acetate (1.5 mL). The reaction mixture was degassed using a stream of argon bubbled through a glass pipet reaching the bottom of the test-tube, while vigorous stirring was maintained for 3 min. The test-tube was capped and the reaction mixture was irradiated with LED light ( $\lambda = 400$  nm) while stirring for 12 h. The reaction mixture was then diluted with ethyl acetate (10 mL), extracted with a saturated solution of EDTA (3 mL). The organic layer was collected, dried over anhydrous Na<sub>2</sub>SO<sub>4</sub>, concentrated under reduced pressure, and the remaining material was purified by flash chromatography on silica gel (hexane/ ethyl acetate 1:9 v/v) to give the amine product **87** (36 mg, 64%) as a colorless liquid.

<sup>1</sup>H NMR (500 MHz, CDCl<sub>3</sub>): 7.35–7.29 (1 H, m), 7.20 (1 H, d, *J* = 7.7 Hz), 7.08 (1 H, t, *J* = 2.1 Hz), 6.80 (1 H, ddd, *J* = 8.2, 2.5, 1.0 Hz), 4.08 (1 H, brs), 3.03 (3 H, s) ppm. – <sup>13</sup>C NMR (125 MHz, CDCl<sub>3</sub>): 150.0, 141.5, 130.2, 117.4, 115.3, 109.8, 44.6 ppm. – <sup>2</sup>H NMR (77 MHz, CDCl<sub>3</sub>): 2.85 (3 H, s) ppm. – IR: 3403, 3067, 2925, 2198, 2069, 1600, 1509, 1475, 1420, 1292, 1171, 1079, 1051, 1024, 959 cm<sup>-1</sup>. – HRMS: calcd for C<sub>8</sub>H<sub>8</sub>D<sub>3</sub>NO<sub>2</sub>S: 189.0772, found 189.0778 [M+H<sup>+</sup>].

***N*-(Methyl-*d*<sub>3</sub>)-3-(pentafluoro- $\lambda^6$ -sulfaneyl)aniline (88)**

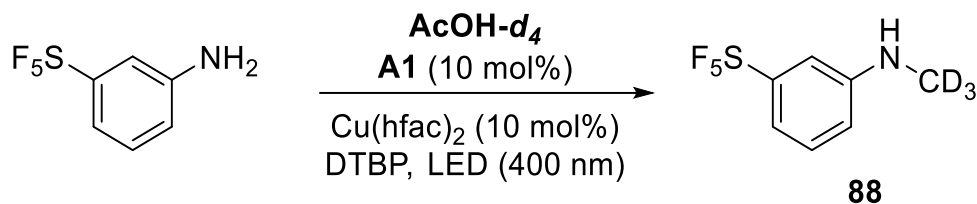

According to **GP1**, the reaction was carried out with 3-(pentafluoro- $\lambda^6$ -sulfaneyl)aniline (66 mg, 0.3 mmol), acetic acid-*d*<sub>4</sub> (96 mg, 1.5 mmol, 5.0 equiv.), acridine **A1** (9 mg, 0.03 mmol, 10 mol%), Cu(hfac)<sub>2</sub> (14 mg, 0.03 mmol, 10 mol%), and DTBP (88 mg, 0.6 mmol, 2 equiv.) in ethyl acetate (1.5 mL). The reaction mixture was degassed using a stream of argon bubbled through a glass pipet reaching the bottom of the test-tube, while vigorous stirring was maintained for 3 min. The test-tube was capped and the reaction mixture was irradiated with LED light ( $\lambda = 400$  nm) while stirring for 12 h. The reaction mixture was then diluted with ethyl acetate (10 mL), extracted with a saturated solution of EDTA (3 mL). The organic layer was collected, dried over anhydrous Na<sub>2</sub>SO<sub>4</sub>, concentrated under reduced pressure, and the remaining material was purified by flash chromatography on silica gel (hexane/ ethyl acetate 95 : 5 v/v) to give the amine product **88** (52 mg, 73%) as a colorless liquid.

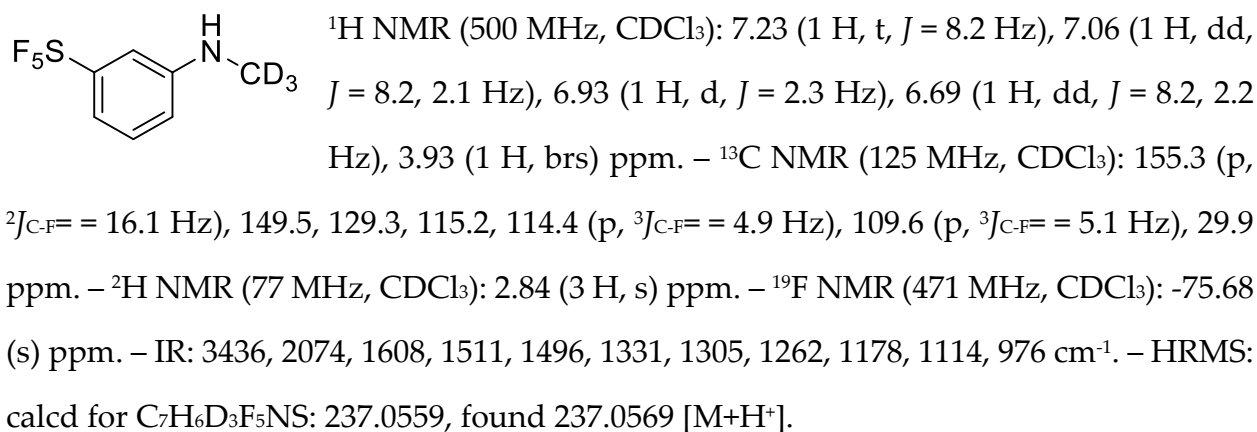

#### 4-(Difluoromethoxy)-*N*-(methyl-*d*<sub>3</sub>)aniline (**89**)

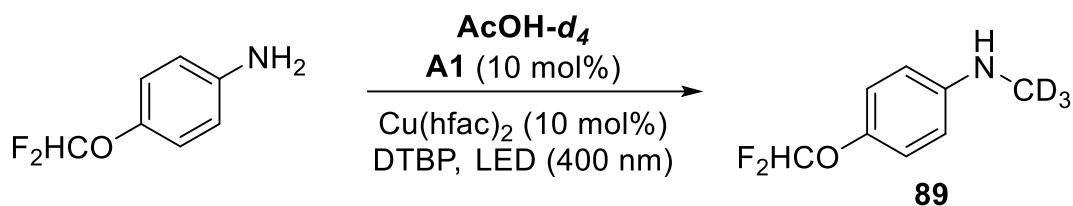

According to **GP1**, the reaction was carried out with 4-(difluoromethoxy)aniline (48 mg, 0.3 mmol), acetic acid-*d*<sub>4</sub> (96 mg, 1.5 mmol, 5.0 equiv.), acridine **A1** (9 mg, 0.03 mmol, 10 mol%), Cu(hfac)<sub>2</sub> (14 mg, 0.03 mmol, 10 mol%), and DTBP (88 mg, 0.6 mmol, 2 equiv.) in ethyl acetate (1.5 mL). The reaction mixture was degassed using a stream of argon bubbled through a glass pipet reaching the bottom of the test-tube, while vigorous stirring was maintained for 3 min. The test-tube was capped and the reaction mixture was irradiated with LED light ( $\lambda = 400$  nm) while stirring for 12 h. The reaction mixture was then diluted with ethyl acetate (10 mL), extracted with a saturated solution of EDTA (3 mL). The organic layer was collected, dried over anhydrous Na<sub>2</sub>SO<sub>4</sub>, concentrated under reduced pressure, and the remaining material was purified by flash chromatography on silica gel (hexane/ ethyl acetate 95 : 5 v/v) to give the amine product **89** (25 mg, 48%) as a colorless liquid.

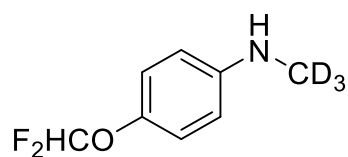

<sup>1</sup>H NMR (500 MHz, CDCl<sub>3</sub>): 6.98 (2 H, d, *J* = 8.8 Hz), 6.56 (2 H, d, *J* = 8.9 Hz), 6.37 (1 H, t, *J* = 74.9 Hz), 3.68 (1 H, brs) ppm. – <sup>13</sup>C NMR (125 MHz, CDCl<sub>3</sub>): 147.4, 142.5, 121.6, 116.7 (t, <sup>1</sup>*J*<sub>C-F</sub> = 258.8 Hz), 113.0 ppm. – <sup>2</sup>H NMR (77 MHz, CDCl<sub>3</sub>): 2.80 (3 H, s) ppm. – <sup>19</sup>F NMR (471 MHz, CDCl<sub>3</sub>): -79.99 (d, *J* = 74.9 Hz) ppm. – IR: 2748, 2194, 2059, 1609, 1512, 1484, 1454, 1396, 1381, 1331, 1290, 1227, 1127, 1041 cm<sup>-1</sup>. – HRMS: calcd for C<sub>20</sub>H<sub>18</sub>FP: 309.1203, found 309.1196 [M+H<sup>+</sup>].

### *N*-(Methyl-*d*<sub>3</sub>)-[1,1'-biphenyl]-4-amine (**90**)

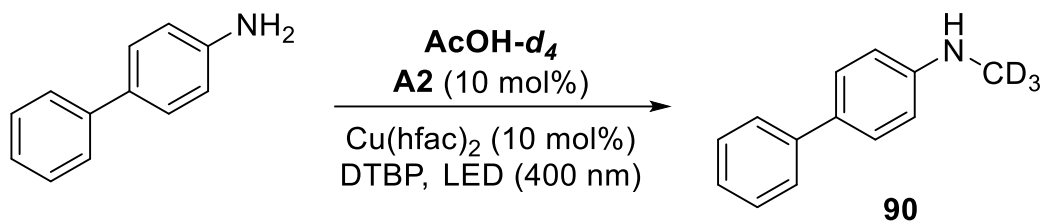

According to **GP1**, the reaction was carried out with [1,1'-biphenyl]-4-amine (51 mg, 0.3 mmol), acetic acid-*d*<sub>4</sub> (96 mg, 1.5 mmol, 5.0 equiv.), acridine **A2** (9 mg, 0.03 mmol, 10 mol%),  $\text{Cu(hfac)}_2$  (14 mg, 0.03 mmol, 10 mol%), and DTBP (88 mg, 0.6 mmol, 2 equiv.) in ethyl acetate (1.5 mL). The reaction mixture was degassed using a stream of argon bubbled through a glass pipet reaching the bottom of the test-tube, while vigorous stirring was maintained for 3 min. The test-tube was capped and the reaction mixture was irradiated with LED light ( $\lambda = 400$  nm) while stirring for 12 h. The reaction mixture was then diluted with ethyl acetate (10 mL), extracted with a saturated solution of EDTA (3 mL). The organic layer was collected, dried over anhydrous  $\text{Na}_2\text{SO}_4$ , concentrated under reduced pressure, and the remaining material was purified by flash chromatography on silica gel (hexane/ ethyl acetate 95 : 5 v/v) to give the amine product **90** (32 mg, 58%) as a colorless liquid.

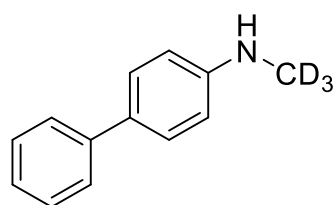

$^1\text{H NMR}$  (500 MHz,  $\text{CDCl}_3$ ): 7.56 (2 H, d,  $J = 7.7$  Hz), 7.48 (2 H, d,  $J = 8.3$  Hz), 7.41 (2 H, t,  $J = 7.6$  Hz), 7.32–7.19 (1 H, m), 6.70 (2 H, d,  $J = 8.5$  Hz), 3.79 (1 H, s) ppm. –  $^{13}\text{C NMR}$  (125 MHz,  $\text{CDCl}_3$ ): 148.9, 141.5, 130.3, 128.8, 128.0, 126.4, 126.2, 112.8 ppm. –  $^2\text{H NMR}$  (77 MHz,  $\text{CDCl}_3$ ): 2.87 (3 H, s) ppm. – IR: 3418, 3023, 2192, 2063, 1613, 1599, 1525, 1442, 1403, 1324, 1273, 1253, 1190, 1150, 1120, 1041  $\text{cm}^{-1}$ . – HRMS: calcd for  $\text{C}_{13}\text{H}_{11}\text{D}_3\text{N}$ : 187.1309, found 187.1317 [ $\text{M}+\text{H}^+$ ].

### *N*-(Methyl-*d*<sub>3</sub>)naphthalen-2-amine (**91**)

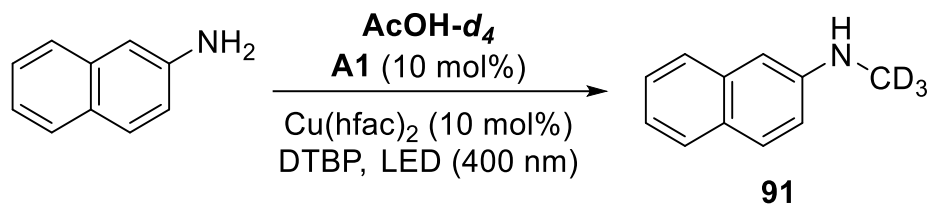

According to **GP1**, the reaction was carried out with naphthalen-2-amine (43 mg, 0.3 mmol), acetic acid-*d*<sub>4</sub> (96 mg, 1.5 mmol, 5.0 equiv.), acridine **A1** (9 mg, 0.03 mmol, 10 mol%), Cu(hfac)<sub>2</sub> (14 mg, 0.03 mmol, 10 mol%), and DTBP (88 mg, 0.6 mmol, 2 equiv.) in ethyl acetate (1.5 mL). The reaction mixture was degassed using a stream of argon bubbled through a glass pipet reaching the bottom of the test-tube, while vigorous stirring was maintained for 3 min. The test-tube was capped and the reaction mixture was irradiated with LED light ( $\lambda = 400$  nm) while stirring for 12 h. The reaction mixture was then diluted with ethyl acetate (10 mL), extracted with a saturated solution of EDTA (3 mL). The organic layer was collected, dried over anhydrous Na<sub>2</sub>SO<sub>4</sub>, concentrated under reduced pressure, and the remaining material was purified by flash chromatography on silica gel (hexane/ ethyl acetate 95 : 5 v/v) to give the amine product **91** (71 mg, 64%) as a colorless liquid.

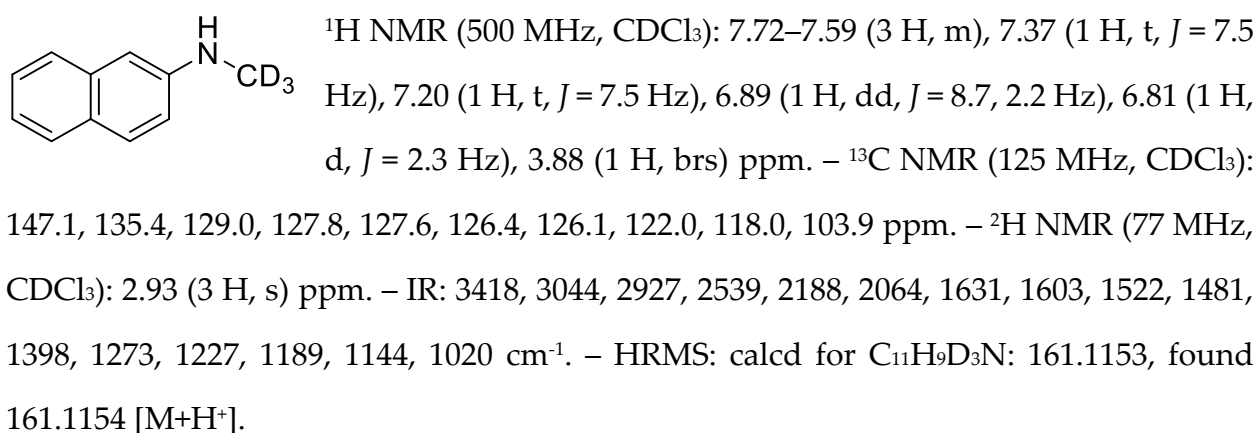



### 5-Bromo-N-(methyl-*d*<sub>3</sub>)naphthalen-1-amine (92)

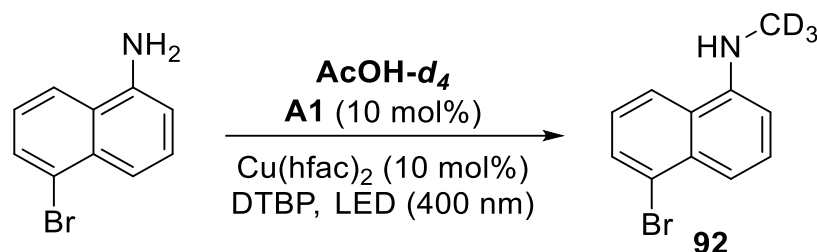

According to **GP1**, the reaction was carried out with 5-bromonaphthalen-1-amine (67mg, 0.3 mmol), acetic acid-*d*<sub>4</sub> (96 mg, 1.5 mmol, 5.0 equiv.), acridine **A1** (9 mg, 0.03 mmol, 10 mol%), Cu(hfac)<sub>2</sub> (14 mg, 0.03 mmol, 10 mol%), and DTBP (88 mg, 0.6 mmol, 2 equiv.) in ethyl acetate (1.5 mL). The reaction mixture was degassed using a stream of argon bubbled through a glass pipet reaching the bottom of the test-tube, while vigorous stirring was maintained for 3 min. The test-tube was capped and the reaction mixture was irradiated with LED light ( $\lambda = 400$  nm) while stirring for 12 h. The reaction mixture was then diluted with ethyl acetate (10 mL), extracted with a saturated solution of EDTA (3 mL). The organic layer was collected, dried over anhydrous Na<sub>2</sub>SO<sub>4</sub>, concentrated under reduced pressure, and the remaining material was purified by flash chromatography on silica gel (hexane/ ethyl acetate 95 : 5 v/v) to give the amine product **92** (34 mg, 47%) as a yellow liquid.

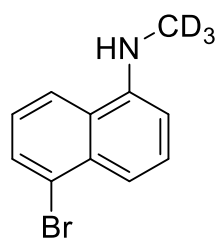

<sup>1</sup>H NMR (500 MHz, CDCl<sub>3</sub>): 7.76 (2 H, dd, *J* = 7.9, 5.0 Hz), 7.65 (1 H, d, *J* = 8.5 Hz), 7.48 (1 H, t, *J* = 8.1 Hz), 7.29–7.20 (1 H, m), 6.65 (1 H, d, *J* = 7.6 Hz), 4.43 (1 H, brs) ppm. – <sup>13</sup>C NMR (125 MHz, CDCl<sub>3</sub>): 144.90, 132.9, 130.1, 128.3, 124.8, 124.7, 123.9, 119.9, 116.4, 104.8 ppm. – <sup>2</sup>H NMR (77 MHz, CDCl<sub>3</sub>): 3.00 (3 H, s) ppm. – IR: 3444, 3072, 2916, 2192, 2064, 1973, 1614, 1587, 1567, 1518, 1470, 1399, 1326, 1287, 1201, 1104, 1063, 997 cm<sup>-1</sup>. – HRMS: calcd for C<sub>11</sub>H<sub>8</sub>D<sub>3</sub>BrN: 239.0258, found 239.0268 [M+H<sup>+</sup>].

### Methyl 2-((methyl-*d*<sub>3</sub>)amino)thiophene-3-carboxylate (**93**)

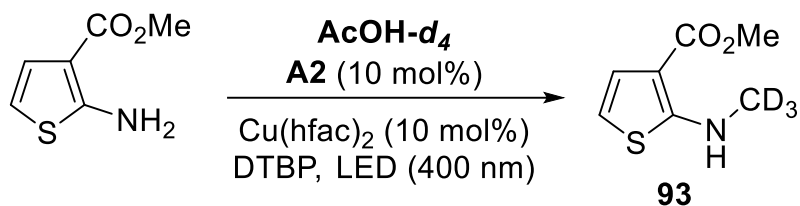

According to **GP1**, the reaction was carried out with methyl 2-aminothiophene-3-carboxylate (47 mg, 0.3 mmol), acetic acid-*d*<sub>4</sub> (96 mg, 1.5 mmol, 5.0 equiv.), acridine **A2** (9 mg, 0.03 mmol, 10 mol%), Cu(hfac)<sub>2</sub> (14 mg, 0.03 mmol, 10 mol%), and DTBP (88 mg, 0.6 mmol, 2 equiv.) in ethyl acetate (1.5 mL). The reaction mixture was degassed using a stream of argon bubbled through a glass pipet reaching the bottom of the test-tube, while vigorous stirring was maintained for 3 min. The test-tube was capped and the reaction mixture was irradiated with LED light ( $\lambda = 400$  nm) while stirring for 12 h. The reaction mixture was then diluted with ethyl acetate (10 mL), extracted with a saturated solution of EDTA (3 mL). The organic layer was collected, dried over anhydrous Na<sub>2</sub>SO<sub>4</sub>, concentrated under reduced pressure, and the remaining material was purified by flash chromatography on silica gel (hexane/ ethyl acetate 95 : 5 v/v) to give the amine product **93** (37 mg, 71%) as a red liquid.

<sup>1</sup>H NMR (500 MHz, CDCl<sub>3</sub>): 7.29 (1 H, brs), 7.03 (1 H, d, *J* = 5.7 Hz), 6.18 (1 H, d, *J* = 5.7 Hz), 3.79 (3 H, s) ppm. – <sup>13</sup>C NMR (125 MHz, CDCl<sub>3</sub>): 167.1, 166.3, 126.5, 105.8, 103.5, 51.0 ppm. – <sup>2</sup>H NMR (77 MHz, CDCl<sub>3</sub>): 2.98 (3 H, s) ppm. – IR: 3349, 2947, 2195, 2064, 1667, 1549, 1512, 1381, 1317, 1242, 1192, 1165 cm<sup>-1</sup>. – HRMS: calcd for C<sub>7</sub>H<sub>7</sub>D<sub>3</sub>NO<sub>2</sub>S: 175.0615, found 175.0622 [M+H<sup>+</sup>].

### *N*-(Methyl-*d*<sub>3</sub>)quinolin-8-amine (**94**)

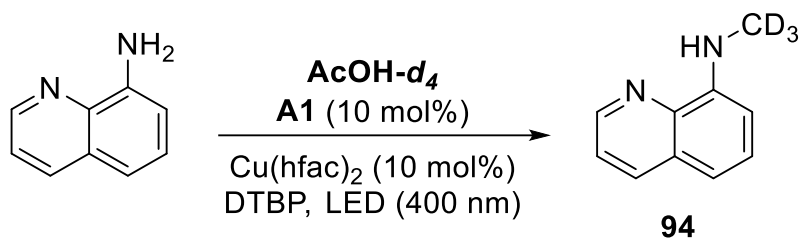

According to **GP1**, the reaction was carried out with quinolin-8-amine (43 mg, 0.3 mmol), acetic acid-*d*<sub>4</sub> (96 mg, 1.5 mmol, 5.0 equiv.), acridine **A1** (9 mg, 0.03 mmol, 10 mol%), Cu(hfac)<sub>2</sub> (14 mg, 0.03 mmol, 10 mol%), and DTBP (88 mg, 0.6 mmol, 2 equiv.) in ethyl acetate (1.5 mL). The reaction mixture was degassed using a stream of argon bubbled through a glass pipet reaching the bottom of the test-tube, while vigorous stirring was maintained for 3 min. The test-tube was capped and the reaction mixture was irradiated with LED light ( $\lambda = 400$  nm) while stirring for 12 h. The reaction mixture was then diluted with ethyl acetate (10 mL), extracted with a saturated solution of EDTA (3 mL). The organic layer was collected, dried over anhydrous Na<sub>2</sub>SO<sub>4</sub>, concentrated under reduced pressure, and the remaining material was purified by flash chromatography on silica gel (hexane/ ethyl acetate 95 : 5 v/v) to give the amine product **94** (26 mg, 52%) as a yellow liquid.

*N*-(Methyl-*d*<sub>3</sub>)quinolin-8-amine (**94**)  
<sup>1</sup>H NMR (500 MHz, CDCl<sub>3</sub>): 8.71 (1 H, dd, *J* = 4.2, 1.7 Hz), 8.06 (1 H, dd, *J* = 8.3, 1.7 Hz), 7.51–7.32 (2 H, m), 7.05 (dd, *J* = 8.2, 1.2 Hz), 6.65 (1 H, dd, *J* = 7.6, 1.2 Hz), 6.11 (1 H, brs) ppm. – <sup>13</sup>C NMR (125 MHz, CDCl<sub>3</sub>): 146.9, 146.0, 138.4, 136.1, 128.7, 128.0, 121.5, 113.8, 104.3 ppm. – <sup>2</sup>H NMR (77 MHz, CDCl<sub>3</sub>): 3.03 (3 H, s) ppm. – IR: 3411, 3032, 2965, 2185, 2056, 1599, 1574, 1519, 1478, 1444, 1380, 1341, 1233, 1200, 1149, 1090 cm<sup>-1</sup>. – HRMS: calcd for C<sub>10</sub>H<sub>8</sub>D<sub>3</sub>N<sub>2</sub>: 162.1105, found 162.1110 [M+H<sup>+</sup>].

#### 4-(Tert-butyl)-N-(4-(tert-butyl)phenyl)-N-(methyl-*d*<sub>3</sub>)aniline (95)

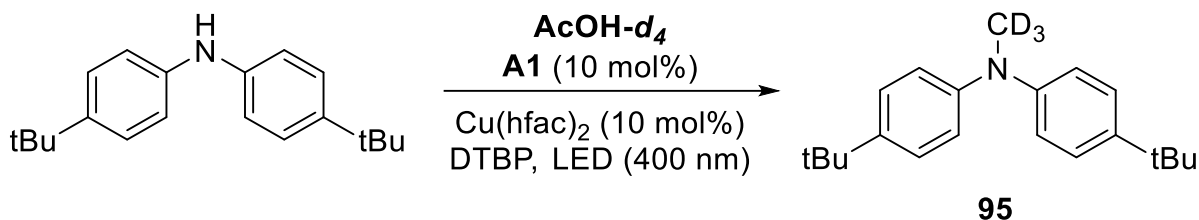

According to **GP1**, the reaction was carried out with bis(4-(*tert*-butyl)phenyl)amine (84 mg, 0.3 mmol), acetic acid-*d*<sub>4</sub> (96 mg, 1.5 mmol, 5.0 equiv.), acridine **A1** (9 mg, 0.03 mmol, 10 mol%), Cu(hfac)<sub>2</sub> (14 mg, 0.03 mmol, 10 mol%), and DTBP (88 mg, 0.6 mmol, 2 equiv.) in ethyl acetate (1.5 mL). The reaction mixture was degassed using a stream of argon bubbled through a glass pipet reaching the bottom of the test-tube, while vigorous stirring was maintained for 3 min. The test-tube was capped and the reaction mixture was irradiated with LED light ( $\lambda = 400$  nm) while stirring for 12 h. The reaction mixture was then diluted with ethyl acetate (10 mL), extracted with a saturated solution of EDTA (3 mL). The organic layer was collected, dried over anhydrous Na<sub>2</sub>SO<sub>4</sub>, concentrated under reduced pressure, and the remaining material was purified by flash chromatography on silica gel (hexane/ ethyl acetate 95 : 5 v/v) to give the amine product **95** (61 mg, 68%) as a colorless solid.

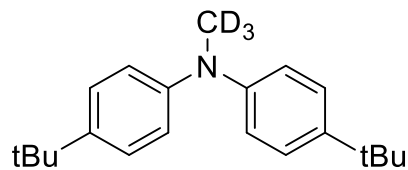

m.p.: 90–93 °C. – <sup>1</sup>H NMR (500 MHz, CDCl<sub>3</sub>): 7.31 (4 H, d,  $J = 8.3$  Hz), 6.98 (4 H, d,  $J = 8.3$  Hz), 1.34 (18 H, s) ppm. – <sup>13</sup>C NMR (125 MHz, CDCl<sub>3</sub>): 146.7, 143.8, 126.1, 119.9, 34.3, 31.6 ppm. – <sup>2</sup>H NMR (77 MHz, CDCl<sub>3</sub>): 3.29 (3 H, s) ppm. – IR: 3034, 2957, 2901, 2194, 2062, 1605, 1508, 1463, 1362, 1331, 1305, 1266, 1201 cm<sup>-1</sup>. – HRMS: calcd for C<sub>21</sub>H<sub>27</sub>D<sub>3</sub>N: 299.2561, found 299.2562 [M+H<sup>+</sup>].

### 4-Methyl-N-(methyl-*d*<sub>3</sub>)-N-(*p*-tolyl)aniline (**96**)

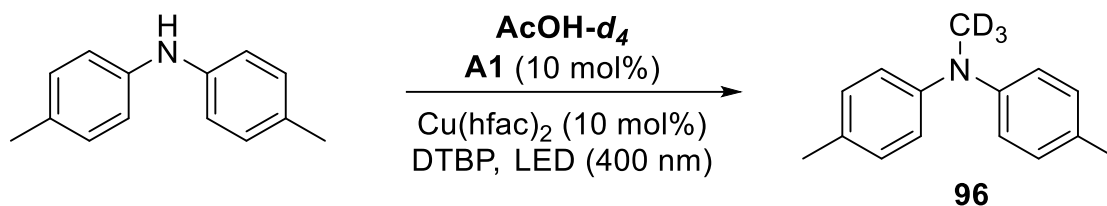

According to **GP1**, the reaction was carried out with di-*p*-tolylamine (59 mg, 0.3 mmol), acetic acid-*d*<sub>4</sub> (96 mg, 1.5 mmol, 5.0 equiv.), acridine **A1** (9 mg, 0.03 mmol, 10 mol%), Cu(hfac)<sub>2</sub> (14 mg, 0.03 mmol, 10 mol%), and DTBP (88 mg, 0.6 mmol, 2 equiv.) in ethyl acetate (1.5 mL). The reaction mixture was degassed using a stream of argon bubbled through a glass pipet reaching the bottom of the test-tube, while vigorous stirring was maintained for 3 min. The test-tube was capped and the reaction mixture was irradiated with LED light ( $\lambda = 400$  nm) while stirring for 12 h. The reaction mixture was then diluted with ethyl acetate (10 mL), extracted with a saturated solution of EDTA (3 mL). The organic layer was collected, dried over anhydrous Na<sub>2</sub>SO<sub>4</sub>, concentrated under reduced pressure, and the remaining material was purified by flash chromatography on silica gel (hexane/ ethyl acetate 95 : 5 v/v) to give the amine product **96** (47 mg, 73%) as a colorless liquid.

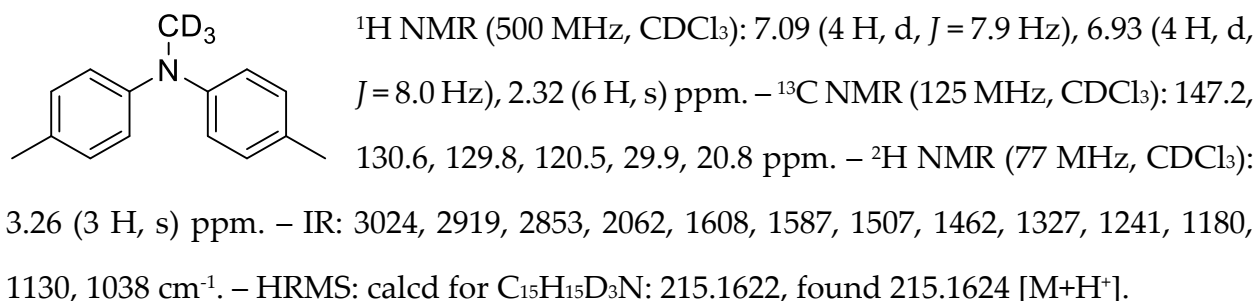

### 3-Ethyl-3-(4-((methyl-*d*<sub>3</sub>)amino)phenyl)piperidine-2,6-dione (**97**)

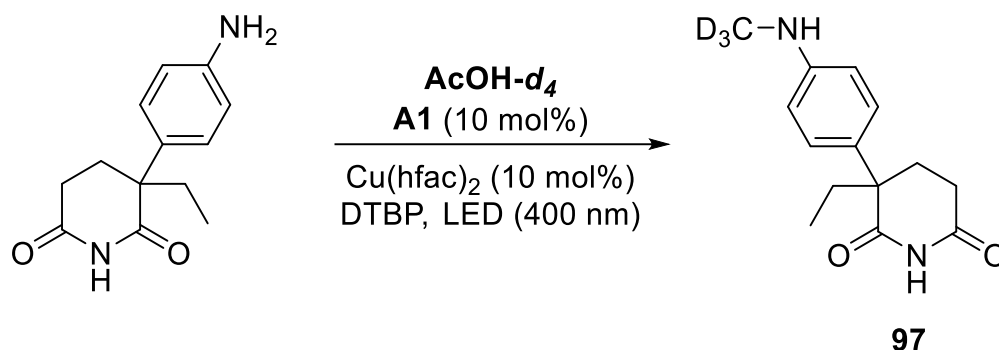

According to **GP1**, the reaction was carried out with 3-(4-aminophenyl)-3-ethylpiperidine-2,6-dione (70 mg, 0.3 mmol), acetic acid-*d*<sub>4</sub> (96 mg, 1.5 mmol, 5.0 equiv.), acridine **A1** (9 mg, 0.03 mmol, 10 mol%), Cu(hfac)<sub>2</sub> (14 mg, 0.03 mmol, 10 mol%), and DTBP (88 mg, 0.6 mmol, 2 equiv.) in ethyl acetate (1.5 mL). The reaction mixture was degassed using a stream of argon bubbled through a glass pipet reaching the bottom of the test-tube, while vigorous stirring was maintained for 3 min. The test-tube was capped and the reaction mixture was irradiated with LED light ( $\lambda = 400$  nm) while stirring for 12 h. The reaction mixture was then diluted with ethyl acetate (10 mL), extracted with a saturated solution of EDTA (3 mL). The organic layer was collected, dried over anhydrous Na<sub>2</sub>SO<sub>4</sub>, concentrated under reduced pressure, and the remaining material was purified by flash chromatography on silica gel (hexane/ ethyl acetate 3:7 v/v) to give the amine product **97** (46 mg, 62%) as a colorless liquid.

<sup>1</sup>H NMR (500 MHz, CDCl<sub>3</sub>): 8.14 (1 H, brs), 7.07 (2 H, d, *J* = 8.8 Hz), 6.57 (2 H, d, *J* = 8.7 Hz), 3.78 (1 H, s), 2.56 (1 H, ddd, *J* = 17.8, 4.7, 2.8 Hz), 2.46 (1 H, ddd, *J* = 18.0, 13.3, 5.0 Hz), 2.31 (1 H, ddd, *J* = 14.2, 5.0, 2.7 Hz), 2.15 (1 H, td, *J* = 13.8, 4.6 Hz), 2.00 (1 H, ddd, *J* = 21.7, 14.0, 6.6 Hz), 1.87 (1 H, dq, *J* = 14.6, 7.4 Hz), 0.85 (3 H, t, *J* = 7.5 Hz) ppm. – <sup>13</sup>C NMR (125 MHz, CDCl<sub>3</sub>): 175.9, 172.9, 148.7, 127.2, 126.7, 112.8, 50.3,

33.1, 29.5, 27.1, 9.1 ppm. –  $^2\text{H}$  NMR (77 MHz,  $\text{CDCl}_3$ ): 2.80 (3 H, s) ppm. – IR: 3370, 3019, 2253, 2055, 1698, 1614, 1463, 1327, 1215, 1184, 904  $\text{cm}^{-1}$ . – HRMS: calcd for  $\text{C}_{14}\text{H}_{16}\text{D}_3\text{N}_2\text{O}_2$ : 250.1629, found 250.1640  $[\text{M}+\text{H}^+]$ .

### 3,4-Dimethyl-*N,N*-bis(methyl- $d_3$ )aniline (**98**)

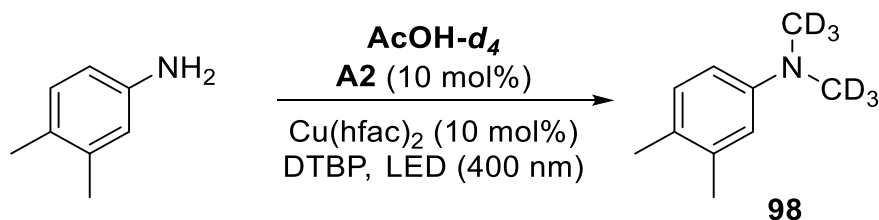

According to **GP1**, the reaction was carried out with 3,4-dimethylaniline (36 mg, 0.3 mmol), acetic acid- $d_4$  (115 mg, 1.8 mmol, 6.0 equiv.), acridine **A2** (9 mg, 0.03 mmol, 10 mol%),  $\text{Cu(hfac)}_2$  (14 mg, 0.03 mmol, 10 mol%), and DTBP (88 mg, 0.6 mmol, 2 equiv.) in ethyl acetate (1.5 mL). The reaction mixture was degassed using a stream of argon bubbled through a glass pipet reaching the bottom of the test-tube, while vigorous stirring was maintained for 3 min. The test-tube was capped and the reaction mixture was irradiated with LED light ( $\lambda = 400$  nm) while stirring for 12 h. The reaction mixture was then diluted with ethyl acetate (10 mL), extracted with a saturated solution of EDTA (3 mL). The organic layer was collected, dried over anhydrous  $\text{Na}_2\text{SO}_4$ , concentrated under reduced pressure, and the remaining material was purified by flash chromatography on silica gel (hexane/ ethyl acetate 3:7 v/v) to give the amine product **98** (24 mg, 52%) as a colorless liquid.

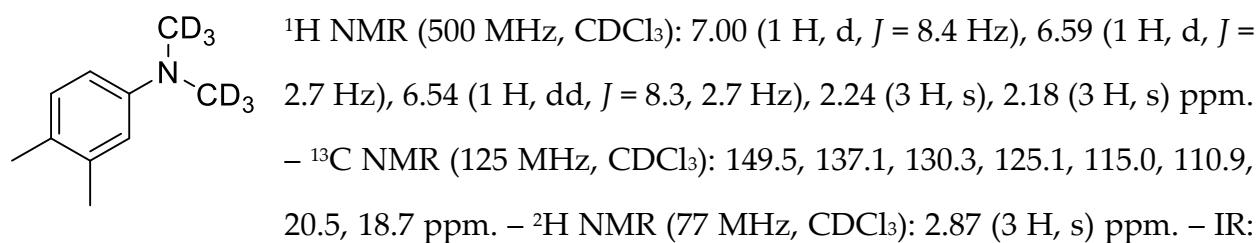

3017, 2919, 2857, 2193, 2051, 1738, 1613, 1567, 1510, 1454, 1335, 1290, 1200, 1159, 1136 1065  $\text{cm}^{-1}$ . – HRMS: calcd for  $\text{C}_{10}\text{H}_{10}\text{D}_6\text{N}$ : 156.1654, found 156.1656  $[\text{M}+\text{H}^+]$ .

### 1-(3-(trifluoromethyl)phenyl)pyrrolidine (**100**)

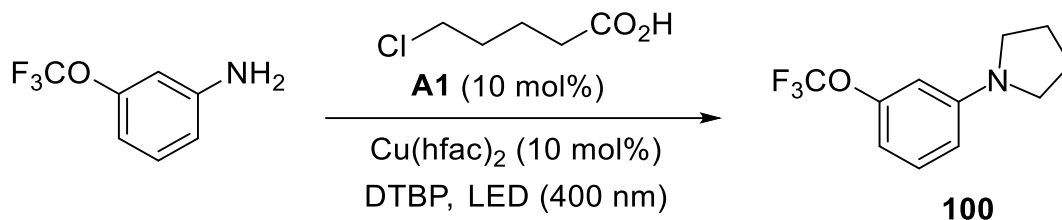

According to **GP1**, the reaction was carried out with 3-(trifluoromethoxy)aniline (53 mg, 0.3 mmol), 5-chlorovaleric acid (102 mg, 0.75 mmol, 2.5 equiv.), acridine **A1** (9 mg, 0.03 mmol, 10 mol%),  $\text{Cu}(\text{hfac})_2$  (14 mg, 0.03 mmol, 10 mol%), and DTBP (88 mg, 0.6 mmol, 2 equiv.) in ethyl acetate (4.5 mL). The reaction mixture was degassed using a stream of argon bubbled through a glass pipet reaching the bottom of the test-tube, while vigorous stirring was maintained for 3 min. The test-tube was capped and the reaction mixture was irradiated with LED light ( $\lambda = 400 \text{ nm}$ ) while stirring for 12 h. The reaction mixture was then diluted with ethyl acetate (10 mL), extracted with a saturated solution of EDTA (3 mL). The organic layer was collected, dried over anhydrous  $\text{Na}_2\text{SO}_4$ , concentrated under reduced pressure, and the remaining material was purified by flash chromatography on silica gel (hexane/ ethyl acetate 98 : 2 v/v) to give the amine product **100** (43 mg, 63%) as a pale brown liquid.

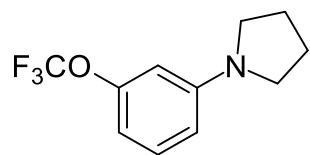

$^1\text{H}$  NMR (500 MHz,  $\text{CDCl}_3$ ): 7.18 (1 H, t,  $J = 8.2 \text{ Hz}$ ), 6.52–6.47 (1 H, m), 6.45 (1 H, dd,  $J = 8.4, 2.3 \text{ Hz}$ ), 6.36 (1 H, d,  $J = 2.3 \text{ Hz}$ ), 3.31–3.24 (4 H, m), 2.06–1.95 (4 H, m) ppm. –  $^{13}\text{C}$  NMR (125 MHz,  $\text{CDCl}_3$ ): 150.6, 149.2, 130.1, 120.7 (q,  $^1J_{\text{C-F}} = 256.1 \text{ Hz}$ ), 110.0, 107.2, 104.1, 47.8, 25.6 ppm. –  $^{19}\text{F}$  NMR (471 MHz,  $\text{CDCl}_3$ ): -57.42 (s) ppm. – IR: 2972, 2943, 2922, 2844, 1614, 1574, 1504, 1487, 1461, 1376, 1253, 1219, 1158, 1017, 934  $\text{cm}^{-1}$ . – HRMS: calcd for  $\text{C}_{11}\text{H}_{13}\text{F}_3\text{NO}$ : 232.0944, found 232.0945  $[\text{M}+\text{H}^+]$ .



### 1-(4-Fluorophenyl)pyrrolidine (**101**)<sup>[32]</sup>

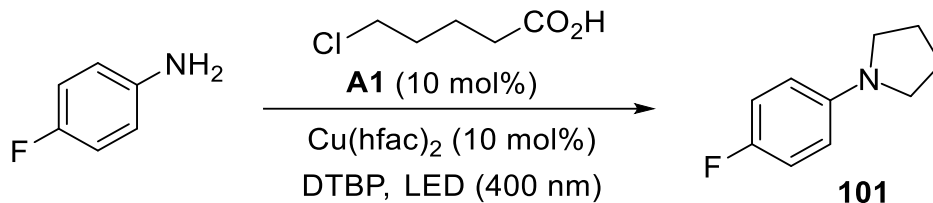

According to **GP1**, the reaction was carried out with 4-fluoroaniline (33 mg, 0.3 mmol), 5-chlorovaleric acid (102 mg, 0.75 mmol, 2.5 equiv.), acridine **A1** (9 mg, 0.03 mmol, 10 mol%), Cu(hfac)<sub>2</sub> (14 mg, 0.03 mmol, 10 mol%), and DTBP (88 mg, 0.6 mmol, 2 equiv.) in ethyl acetate (4.5 mL). The reaction mixture was degassed using a stream of argon bubbled through a glass pipet reaching the bottom of the test-tube, while vigorous stirring was maintained for 3 min. The test-tube was capped and the reaction mixture was irradiated with LED light ( $\lambda = 400$  nm) while stirring for 12 h. The reaction mixture was then diluted with ethyl acetate (10 mL), extracted with a saturated solution of EDTA (3 mL). The organic layer was collected, dried over anhydrous Na<sub>2</sub>SO<sub>4</sub>, concentrated under reduced pressure, and the remaining material was purified by flash chromatography on silica gel (hexane/ ethyl acetate 98 : 2 v/v) to give the amine product **101** (32 mg, 65%) as an orange liquid.

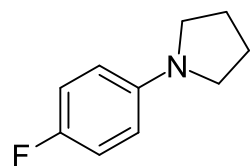

<sup>1</sup>H NMR (500 MHz, CDCl<sub>3</sub>): 6.94 (1 H, t,  $J = 8.8$  Hz), 6.48 (1 H, dd,  $J = 9.0, 4.3$  Hz), 3.30–3.12 (2 H, m), 2.06–1.90 (2 H, m) ppm. – <sup>13</sup>C NMR (125 MHz, CDCl<sub>3</sub>): 154.9 (d,  $^1J_{C-F} = 232.8$  Hz), 145.0, 115.59 (d,  $^2J_{C-F} = 21.9$  Hz), 112.2 (d,  $^3J_{C-F} = 7.2$  Hz), 48.2, 25.6 ppm. – <sup>19</sup>F NMR (471 MHz, CDCl<sub>3</sub>): -130.82–131.08 (m) ppm. – IR: 3056, 2970, 2951, 2912, 2844, 1738, 1610, 1518, 1488, 1462, 1370, 1264, 1223, 1206, 1157, 908, 813 cm<sup>-1</sup>.

### 1-(3-(Methylthio)phenyl)pyrrolidine (**102**)<sup>[33]</sup>

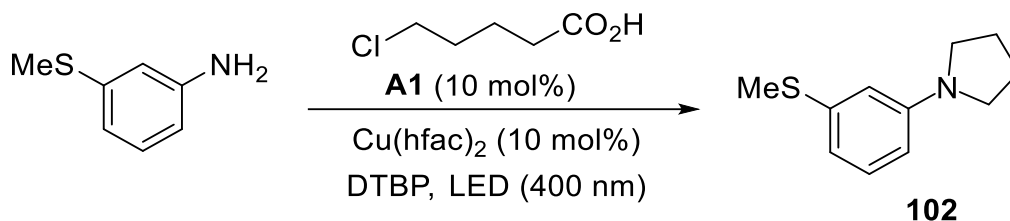

According to **GP1**, the reaction was carried out with 3-(methylthio)aniline (42 mg, 0.3 mmol), 5-chlorovaleric acid (102 mg, 0.75 mmol, 2.5 equiv.), acridine **A1** (9 mg, 0.03 mmol, 10 mol%),  $\text{Cu}(\text{hfac})_2$  (14 mg, 0.03 mmol, 10 mol%), and DTBP (88 mg, 0.6 mmol, 2 equiv.) in ethyl acetate (4.5 mL). The reaction mixture was degassed using a stream of argon bubbled through a glass pipet reaching the bottom of the test-tube, while vigorous stirring was maintained for 3 min. The test-tube was capped and the reaction mixture was irradiated with LED light ( $\lambda = 400$  nm) while stirring for 12 h. The reaction mixture was then diluted with ethyl acetate (10 mL), extracted with a saturated solution of EDTA (3 mL). The organic layer was collected, dried over anhydrous  $\text{Na}_2\text{SO}_4$ , concentrated under reduced pressure, and the remaining material was purified by flash chromatography on silica gel (hexane/ ethyl acetate 98 : 2 v/v) to give the amine product **102** (31 mg, 53%) as a brown liquid.

$^1\text{H}$  NMR (500 MHz,  $\text{CDCl}_3$ ): 7.15 (1 H, t,  $J = 7.9$  Hz), 6.58 (1 H, dd,  $J = 7.7, 1.7$  Hz), 6.49 (1 H, t,  $J = 2.1$  Hz), 6.37 (1 H, dd,  $J = 8.2, 2.4$  Hz), 3.39–3.15 (4 H, m), 2.49 (3 H, s), 2.11–1.89 (4 H, m) ppm. –  $^{13}\text{C}$  NMR (125 MHz,  $\text{CDCl}_3$ ): 148.3, 139.0, 129.6, 113.8, 110.0, 109.1, 47.7, 25.6, 16.2 ppm. – IR: 3040, 2964, 2919, 2893, 2835, 1588, 1562, 1486, 1463, 1360, 1277, 1196, 1170, 1102, 764, 694  $\text{cm}^{-1}$ .

### 1-(3-Methoxyphenyl)pyrrolidine (103)<sup>[34]</sup>

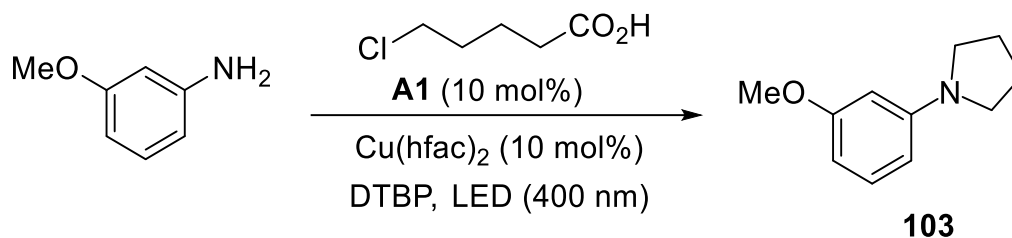

According to **GP1**, the reaction was carried out with *m*-anisidine (37 mg, 0.3 mmol), 5-chlorovaleric acid (102 mg, 0.75 mmol, 2.5 equiv.), acridine **A1** (9 mg, 0.03 mmol, 10 mol%), Cu(hfac)<sub>2</sub> (14 mg, 0.03 mmol, 10 mol%), and DTBP (88 mg, 0.6 mmol, 2 equiv.) in ethyl acetate (4.5 mL). The reaction mixture was degassed using a stream of argon bubbled through a glass pipet reaching the bottom of the test-tube, while vigorous stirring was maintained for 3 min. The test-tube was capped and the reaction mixture was irradiated with LED light ( $\lambda = 400$  nm) while stirring for 36 h. The reaction mixture was then diluted with ethyl acetate (10 mL), extracted with a saturated solution of EDTA (3 mL). The organic layer was collected, dried over anhydrous Na<sub>2</sub>SO<sub>4</sub>, concentrated under reduced pressure, and the remaining material was purified by flash chromatography on silica gel (hexane/ ethyl acetate 98 : 2 v/v) to give the amine product **103** (39 mg, 73%) as a brown liquid.

<sup>1</sup>H NMR (500 MHz, CDCl<sub>3</sub>): 7.14 (1 H, t, *J* = 8.1 Hz), 6.25 (1 H, dd, *J* = 8.1, 2.4 Hz), 6.21 (1 H, dd, *J* = 8.2, 2.3 Hz), 6.13 (1 H, t, *J* = 2.4 Hz), 3.81 (3 H, s), 3.32–3.22 (4 H, m), 2.06–1.94 (4 H, m) ppm. – <sup>13</sup>C NMR (125 MHz, CDCl<sub>3</sub>): 160.9, 149.4, 129.9, 105.1, 100.6, 98.0, 55.2, 47.8, 25.6 ppm. – IR: 3055, 2970, 2917, 2847, 1736, 1606, 1573, 1502, 1458, 1372, 1264, 1219, 1167, 1053, 908, 704 cm<sup>-1</sup>.

### 1-(3,4-Dimethylphenyl)pyrrolidine (**104**)<sup>[35]</sup>

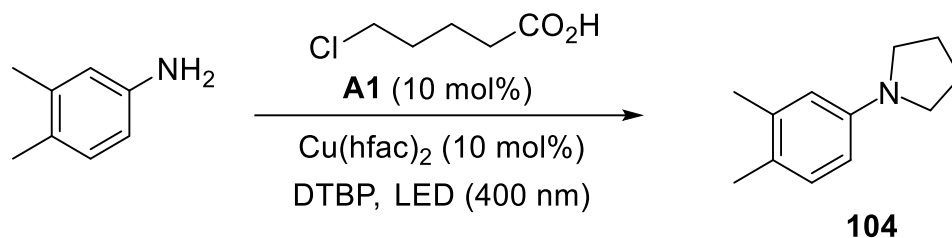

According to **GP1**, the reaction was carried out with 3,4-dimethylaniline (36 mg, 0.3 mmol), 5-chlorovaleric acid (102 mg, 0.75 mmol, 2.5 equiv.), acridine **A1** (9 mg, 0.03 mmol, 10 mol%), Cu(hfac)<sub>2</sub> (14 mg, 0.03 mmol, 10 mol%), and DTBP (88 mg, 0.6 mmol, 2 equiv.) in ethyl acetate (4.5 mL). The reaction mixture was degassed using a stream of argon bubbled through a glass pipet reaching the bottom of the test-tube, while vigorous stirring was maintained for 3 min. The test-tube was capped and the reaction mixture was irradiated with LED light ( $\lambda = 400$  nm) while stirring for 36 h. The reaction mixture was then diluted with ethyl acetate (10 mL), extracted with a saturated solution of EDTA (3 mL). The organic layer was collected, dried over anhydrous Na<sub>2</sub>SO<sub>4</sub>, concentrated under reduced pressure, and the remaining material was purified by flash chromatography on silica gel (hexane/ ethyl acetate 98 : 2 v/v) to give the amine product **104** (37 mg, 70%) as a brown liquid.

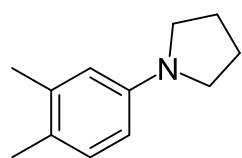

<sup>1</sup>H NMR (500 MHz, CDCl<sub>3</sub>): 6.99 (1 H, d,  $J = 8.1$  Hz), 6.42 (1 H, d,  $J = 2.6$  Hz), 6.36 (1 H, dd,  $J = 8.2, 2.6$  Hz), 3.33–3.20 (4 H, m), 2.25 (3 H, s), 2.18 (3 H, s), 2.05–1.94 (4 H, m) ppm. – <sup>13</sup>C NMR (125 MHz, CDCl<sub>3</sub>): 146.8, 137.2, 130.4, 130.3, 123.4, 113.5, 109.4, 48.0, 25.5, 20.4, 18.7 ppm. – IR: 3066, 2974, 2922, 2867, 1745, 1612, 1511, 1488, 1264, 1200, 1159, 1119, 1102, 1019, 735, 704 cm<sup>-1</sup>.

### 1-(3,4,5-Trimethylphenyl)pyrrolidine (**105**)

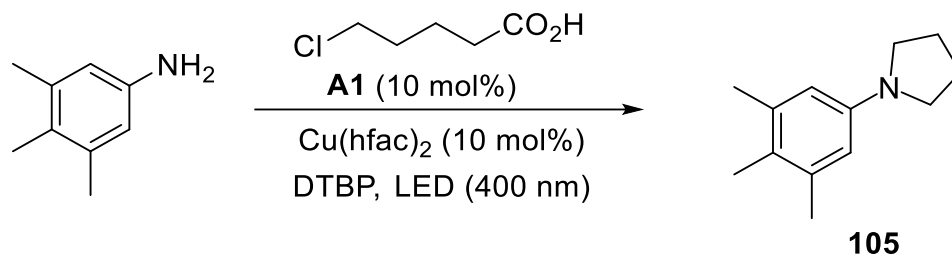

According to **GP1**, the reaction was carried out with 3,4,5-trimethylaniline (41 mg, 0.3 mmol), 5-chlorovaleric acid (102 mg, 0.75 mmol, 2.5 equiv.), acridine **A1** (9 mg, 0.03 mmol, 10 mol%), Cu(hfac)<sub>2</sub> (14 mg, 0.03 mmol, 10 mol%), and DTBP (88 mg, 0.6 mmol, 2 equiv.) in ethyl acetate (4.5 mL). The reaction mixture was degassed using a stream of argon bubbled through a glass pipet reaching the bottom of the test-tube, while vigorous stirring was maintained for 3 min. The test-tube was capped and the reaction mixture was irradiated with LED light ( $\lambda = 400$  nm) while stirring for 36 h. The reaction mixture was then diluted with ethyl acetate (10 mL), extracted with a saturated solution of EDTA (3 mL). The organic layer was collected, dried over anhydrous Na<sub>2</sub>SO<sub>4</sub>, concentrated under reduced pressure, and the remaining material was purified by flash chromatography on silica gel (hexane/ ethyl acetate 98 : 2 v/v) to give the amine product **105** (30 mg, 53%) as a brown liquid.

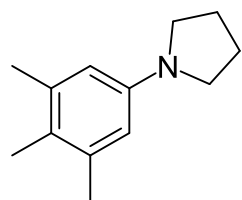

<sup>1</sup>H NMR (500 MHz, CDCl<sub>3</sub>): 6.30 (2 H, s), 3.36–3.19 (2 H, m), 2.27 (3 H, s), 2.10 (1 H, s), 2.05–1.85 (2 H, m) ppm. – <sup>13</sup>C NMR (125 MHz, CDCl<sub>3</sub>): 146.2, 137.1, 122.1, 111.5, 47.9, 25.5, 21.2, 14.4 ppm. – IR: 3058, 2969, 2930, 2883, 2849, 1737, 1498, 1486, 1383, 1364, 1264, 1160, 907, 829, 703

cm<sup>-1</sup>. – HRMS: calcd for C<sub>13</sub>H<sub>19</sub>N: 190.1590, found 190.1589 [M+H<sup>+</sup>].

### 3-Ethyl-3-(4-(pyrrolidin-1-yl)phenyl)piperidine-2,6-dione (**106**)

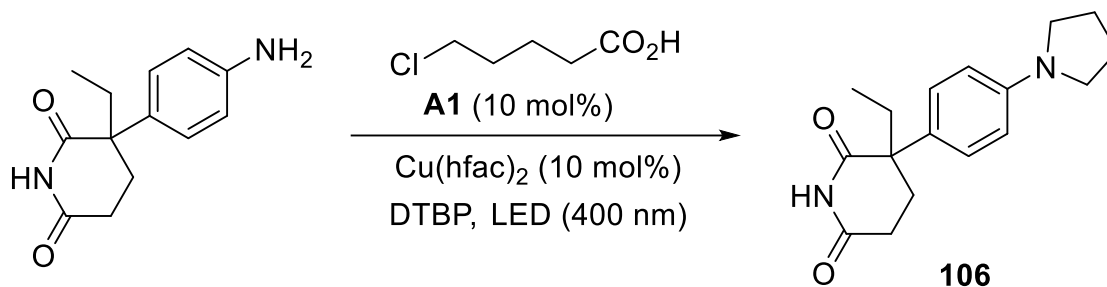

According to **GP1**, the reaction was carried out with 3-(4-aminophenyl)-3-ethylpiperidine-2,6-dione (70 mg, 0.3 mmol), 5-chlorovaleric acid (102 mg, 0.75 mmol, 2.5 equiv.), acridine **A1** (9 mg, 0.03 mmol, 10 mol%),  $\text{Cu}(\text{hfac})_2$  (14 mg, 0.03 mmol, 10 mol%), and DTBP (88 mg, 0.6 mmol, 2 equiv.) in ethyl acetate (4.5 mL). The reaction mixture was degassed using a stream of argon bubbled through a glass pipet reaching the bottom of the test-tube, while vigorous stirring was maintained for 3 min. The test-tube was capped and the reaction mixture was irradiated with LED light ( $\lambda = 400$  nm) while stirring for 12 h. The reaction mixture was then diluted with ethyl acetate (10 mL), extracted with a saturated solution of EDTA (3 mL). The organic layer was collected, dried over anhydrous  $\text{Na}_2\text{SO}_4$ , concentrated under reduced pressure, and the remaining material was purified by flash chromatography on silica gel (hexane/ ethyl acetate 98 : 2 v/v) to give the amine product **106** (43 mg, 50%) as a colorless liquid.

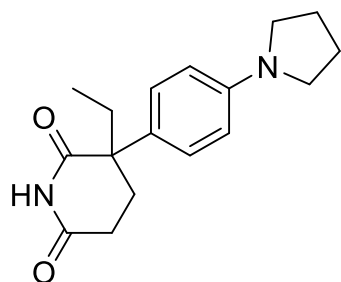

$^1\text{H}$  NMR (500 MHz,  $\text{CDCl}_3$ ): 8.09 (1 H, s), 7.10 (2 H, d,  $J = 8.3$  Hz), 6.53 (2 H, d,  $J = 8.3$  Hz), 3.26 (4 H, d,  $J = 6.3$  Hz), 2.62–2.41 (2 H, m), 2.33 (1 H, dt,  $J = 14.3, 3.7$  Hz), 2.16 (1 H, td,  $J = 13.8, 4.8$  Hz), 1.94 (6 H, dt,  $J = 49.7, 6.8$  Hz), 0.85 (3 H, t,  $J = 7.5$  Hz) ppm.

–  $^{13}\text{C}$  NMR (125 MHz,  $\text{CDCl}_3$ ): 175.9, 172.9, 147.1, 127.1, 124.6,

111.9, 50.2, 47.7, 33.1, 29.5, 27.1, 25.6, 9.2 ppm. – IR: 3212, 3092, 3055, 2966, 2951, 2878, 2844, 1694, 1610, 1520, 1565, 1520, 1487, 1460, 1352, 1266, 1189, 1048, 814, 733, 702  $\text{cm}^{-1}$ . – HRMS: calcd for  $\text{C}_{17}\text{H}_{23}\text{N}_2\text{O}_2$ : 287.1754, found 287.1754 [ $\text{M}+\text{H}^+$ ].

### N-(2-Methoxycyclohexyl)-4-methylaniline (S5)

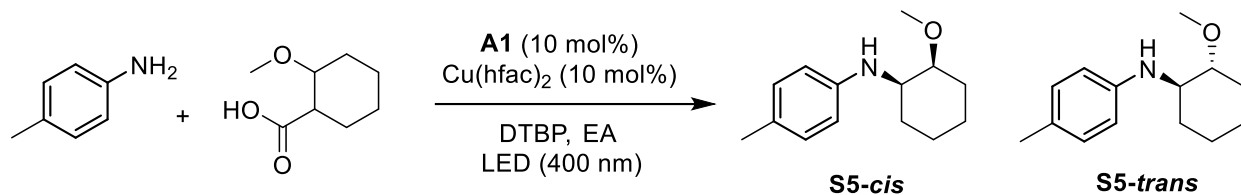

According to **GP1**, the reaction was carried out with *p*-toluidine (32 mg, 0.3 mmol), 2-methoxycyclohexane-1-carboxylic acid (cis/trans = 1 : 1.5) (96 mg, 0.75 mmol, 2.5 equiv.), acridine **A1** (9 mg, 0.03 mmol, 10 mol%),  $\text{Cu}(\text{hfac})_2$  (14 mg, 0.03 mmol, 10 mol%), and DTBP (88 mg, 0.6 mmol, 2 equiv.) in ethyl acetate (3 mL). The reaction mixture was degassed using a stream of argon bubbled through a glass pipet reaching the bottom of the test-tube, while vigorous stirring was maintained for 3 min. The test-tube was capped and the reaction mixture was irradiated with LED light ( $\lambda = 400$  nm) while stirring at 35 °C for 12 h. The reaction mixture was then diluted with ethyl acetate (10 mL), extracted with a saturated solution of EDTA (3 mL). The organic layer was collected, dried over anhydrous  $\text{Na}_2\text{SO}_4$ , concentrated under reduced pressure, and the remaining material was purified by flash chromatography on silica gel (hexane/ ethyl acetate 95 : 5 v/v) to give the amine product **S5-cis** (9 mg, 14%) and **S5-trans** (44 mg, 67%) as a colorless liquid.

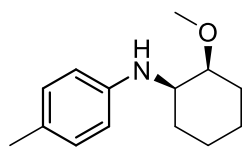

$^1\text{H}$  NMR (500 MHz,  $\text{CDCl}_3$ ): 6.97 (2 H, d,  $J = 8.0$  Hz), 6.55 (2 H, d,  $J = 8.4$  Hz), 3.92 (1 H, brs), 3.51 (1 H, dt,  $J = 5.0, 2.6$  Hz), 3.36 (1 H, dt,  $J = 10.6, 3.4$  Hz), 3.32 (3 H, s), 2.23 (3 H, s), 2.06 – 1.98 (1 H, m), 1.79 – 1.65 (2 H, m), 1.57–1.45 (2 H, m), 1.43 – 1.22 (3 H, m) ppm. –  $^{13}\text{C}$  NMR (125 MHz,  $\text{CDCl}_3$ ): 145.3, 129.9, 126.5, 114.1, 77.8, 56.4, 54.2, 27.6, 27.5, 24.3, 20.5, 20.3 ppm. – IR: 3386, 3024, 2977, 2930, 2861, 1616, 1517, 1458, 1371, 1310, 1297, 1197, 1085, 908, 855, 805, 731  $\text{cm}^{-1}$ . – HRMS: calcd for  $\text{C}_{14}\text{H}_{22}\text{NO}$ : 220.1696, found 220.1694  $[\text{M}+\text{H}^+]$ .

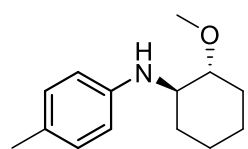

$^1\text{H}$  NMR (500 MHz,  $\text{CDCl}_3$ ): 6.98 (2 H, d,  $J = 8.0$  Hz), 6.62 (2 H, d,  $J = 8.4$  Hz), 3.39 (3 H, s), 3.19 (1 H, td,  $J = 8.9, 3.8$  Hz), 3.13 (1 H, td,  $J = 8.7, 3.5$  Hz), 2.24 (3 H, s), 2.23 – 2.15 (1 H, m), 2.08 (1 H, dd,  $J = 10.6, 5.7$  Hz), 1.80 – 1.73 (1 H, m), 1.69 – 1.62 (1 H, m), 1.42 – 1.26 (3 H, m), 1.24 – 1.15 (1 H, m) ppm. –  $^{13}\text{C}$  NMR (125 MHz,  $\text{CDCl}_3$ ): 145.8, 129.7, 126.9, 114.4, 82.2, 57.0, 56.3, 31.3, 29.1, 23.9, 23.8, 20.5 ppm. – IR: 3401, 3016, 2987, 2866, 2821, 1617, 1573, 1517, 1315, 1251, 1098, 1039, 909, 805, 780  $\text{cm}^{-1}$ . – HRMS: calcd for  $\text{C}_{14}\text{H}_{22}\text{NO}$ : 220.1696, found 220.1696 [ $\text{M}+\text{H}^+$ ].

### *N*-(But-3-en-1-yl)-4-methylaniline (**S6**)<sup>[36]</sup>

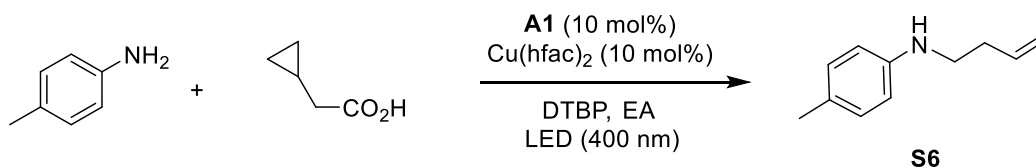

According to **GP2**, the reaction was carried out with *p*-toluidine (80 mg, 0.75 mmol, 2.5 equiv.), 2-cyclopropylacetic acid (30 mg, 0.3 mmol), acridine **A1** (9 mg, 0.03 mmol, 10 mol%),  $\text{Cu}(\text{hfac})_2$  (14 mg, 0.03 mmol, 10 mol%), and DTBP (88 mg, 0.6 mmol, 2.0 equiv.) in ethyl acetate (4.5 mL). The reaction mixture was degassed using a stream of argon bubbled through a glass pipet reaching the bottom of the test-tube, while vigorous stirring was maintained for 3 min. The test-tube was capped and the reaction mixture was irradiated with LED light ( $\lambda = 400$  nm) while stirring for 12 h. The reaction mixture was extracted with ethyl acetate (3x 15 mL). The organic layer was collected, dried over anhydrous  $\text{Na}_2\text{SO}_4$ , concentrated under reduced pressure, and purified by flash chromatography on silica gel (hexane/ ethyl acetate 95 : 5 v/v) to give the amine product **S6** (38 mg, 79%) as a yellow oil.





6.52 (2 H, dd,  $J = 8.4, 3.1$  Hz), 3.47 (1 H, brs), 2.99 (2 H, d,  $J = 7.2$  Hz), 2.22 (3 H, s), 2.11 (1 H, m), 1.61 (4 H, m), 1.24 (4 H, m) ppm.

***N*-(Hex-5-en-1-yl)-4-methylaniline (S8):**  $^1\text{H}$  NMR (500 MHz,  $\text{CDCl}_3$ ): 6.96 (2 H, d,  $J = 7.9$  Hz), 6.52 (2 H, dd,  $J = 8.4, 3.1$  Hz), 5.80 (1 H, ddt,  $J = 16.9, 9.7, 6.7$  Hz), 4.98 (2 H, dd,  $J = 28.0, 13.6$  Hz), 3.47 (1 H, brs), 3.08 (2 H, t,  $J = 7.1$  Hz), 2.22 (3 H, s), 2.11 (2 H, m), 1.80 (2 H, m), 1.61 (2 H, m) ppm. –  $^{13}\text{C}$  NMR (125 MHz,  $\text{CDCl}_3$ ) mixture: 146.5, 146.4, 138.7, 130.0, 129.8, 129.8, 127.6, 126.4, 126.3, 114.8, 113.0, 50.0, 44.3, 39.6, 33.6, 30.8, 29.2, 26.5, 25.4, 20.5 ppm.

– IR (mixture): 3416, 3079, 3016, 2940, 2861, 1646, 1625, 1520, 1478, 1322, 1264, 1204, 1128, 1097, 989, 916  $\text{cm}^{-1}$ .

## X-Ray Crystallographic Data

### 4-Chloro-*N*-cyclohexylaniline (23)

CCDC 1967998

---

Bond precision: C–C = 0.0023 Å Wavelength = 1.54184

Cell: a = 11.2673(2) b = 6.0662(1) c = 16.0679(3)

$\alpha = 90$   $\beta = 100.025(2)$   $\gamma = 90$

Temperature: 100 K

|                                     | Calculated                          | Reported                            |
|-------------------------------------|-------------------------------------|-------------------------------------|
| Volume                              | 1081.47(3)                          | 1081.47(3)                          |
| Space group                         | P 21/c                              | P 1 21/c 1                          |
| Hall group                          | -P 2ybc                             | -P 2ybc                             |
| Moiety formula                      | C <sub>12</sub> H <sub>16</sub> ClN | C <sub>12</sub> H <sub>16</sub> ClN |
| Sum formula                         | C <sub>12</sub> H <sub>16</sub> ClN | C <sub>12</sub> H <sub>16</sub> ClN |
| Mr                                  | 209.71                              | 209.71                              |
| D <sub>x</sub> , g cm <sup>-3</sup> | 1.288                               | 1.288                               |
| Z                                   | 4                                   | 4                                   |
| Mu (mm <sup>-1</sup> )              | 2.775                               | 2.775                               |
| F000                                | 448.0                               | 448.0                               |
| F000'                               | 450.40                              |                                     |
| h,k,l <sub>max</sub>                | 14,7,20                             | 14,7,20                             |
| N <sub>ref</sub>                    | 2283                                | 2206                                |
| T <sub>min</sub> ,T <sub>max</sub>  | 0.753,0.920                         | 0.310,1.000                         |
| T <sub>min</sub> '                  | 0.628                               |                                     |

Correction method = # Reported T Limits:  $T_{\min} = 0.310$   $T_{\max} = 1.000$

AbsCorr = MULTI-SCAN

Data completeness = 0.966

Theta(max) = 76.599

R(reflections) = 0.0396 (1977)

wR2(reflections) = 0.1022 (2206)

S = 1.008

$N_{\text{par}} = 127$

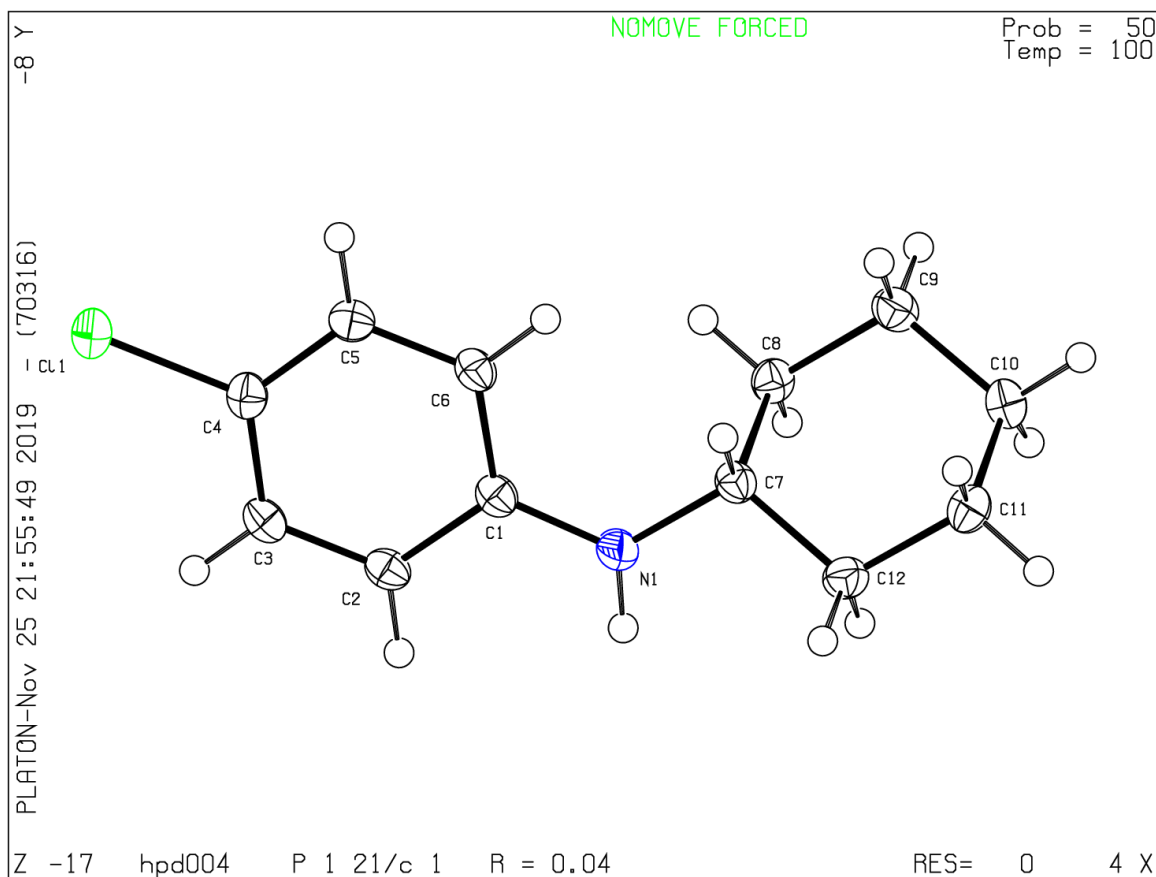

## 4-Bromo-N-cyclohexylaniline (24)

CCDC 1967999

---

Bond precision: C–C = 0.0030 Å Wavelength = 1.54184

Cell: a = 11.5286(2) b = 6.0765(1) c = 16.0680(3)

$\alpha = 90$   $\beta = 101.200(2)$   $\gamma = 90$

Temperature: 100 K

|                                     | Calculated                          | Reported                            |
|-------------------------------------|-------------------------------------|-------------------------------------|
| Volume                              | 1104.18(3)                          | 1104.18(3)                          |
| Space group                         | P 21/c                              | P 1 21/c 1                          |
| Hall group                          | -P 2ybc                             | -P 2ybc                             |
| Moiety formula                      | C <sub>12</sub> H <sub>16</sub> BrN | C <sub>12</sub> H <sub>16</sub> BrN |
| Sum formula                         | C <sub>12</sub> H <sub>16</sub> BrN | C <sub>12</sub> H <sub>16</sub> BrN |
| Mr                                  | 254.16                              | 254.17                              |
| D <sub>x</sub> , g cm <sup>-3</sup> | 1.529                               | 1.529                               |
| Z                                   | 4                                   | 4                                   |
| Mu (mm <sup>-1</sup> )              | 4.732                               | 4.732                               |
| F000                                | 520.0                               | 520.0                               |
| F000'                               | 518.23                              |                                     |
| h,k,l <sub>max</sub>                | 14,7,20                             | 14,7,20                             |
| N <sub>ref</sub>                    | 2314                                | 2230                                |
| T <sub>min</sub> ,T <sub>max</sub>  | 0.306,0.868                         | 0.270,1.000                         |
| T <sub>min</sub> '                  | 0.231                               |                                     |

Correction method = # Reported T Limits: T<sub>min</sub> = 0.270 T<sub>max</sub> = 1.000

AbsCorr = MULTI-SCAN

[Go back to table of contents](#)

Data completeness = 0.964

Theta(max) = 76.322

R(reflections) = 0.0329 (2051)

wR2(reflections) = 0.0929 (2230)

S = 1.091

N<sub>par</sub> = 127

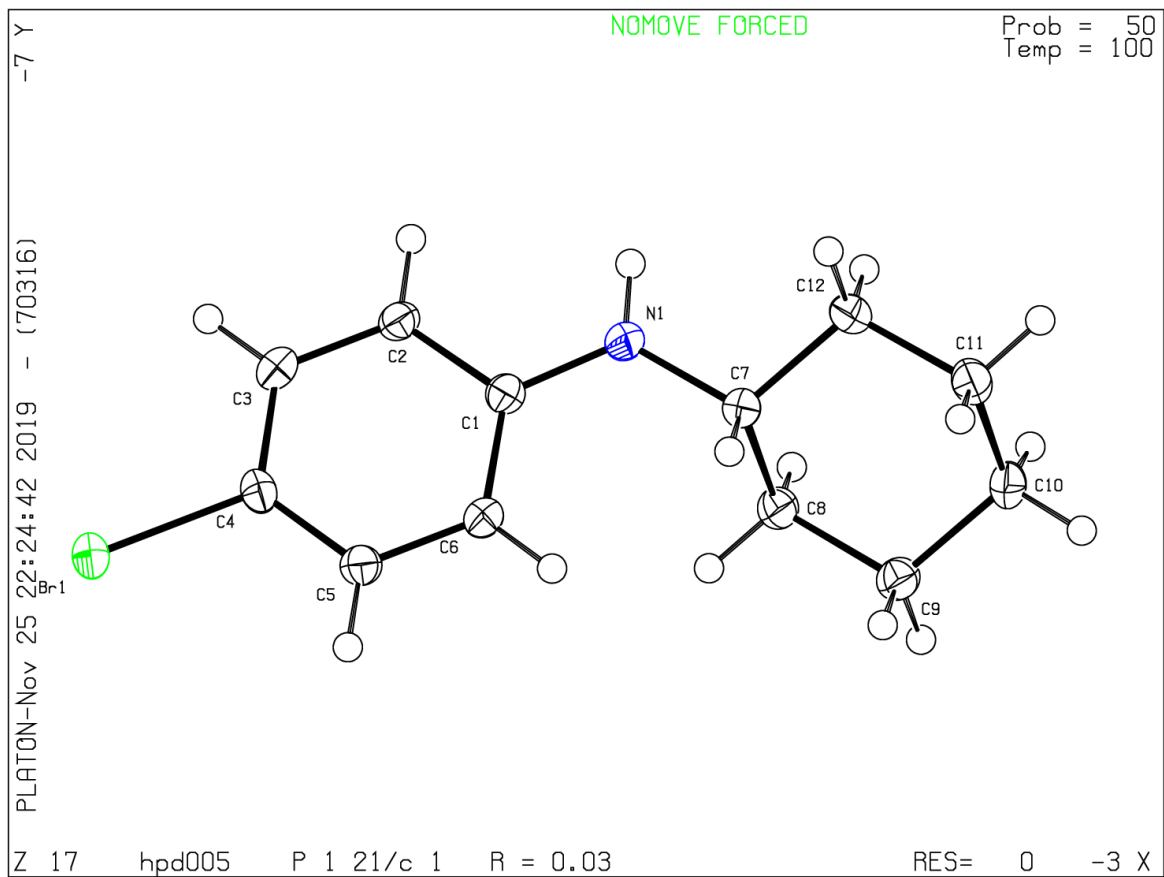

**N-Cyclohexyl-2-methylquinolin-8-amine (60)**

**CCDC 1967993**

---

Bond precision: C–C = 0.0018 Å Wavelength = 0.71073

Cell: a = 13.1241(4) b = 5.2605(1) c = 19.2284(5)

$\alpha = 90$   $\beta = 91.801(3)$   $\gamma = 90$

Temperature: 100 K

|                                     | Calculated                                     | Reported                                       |
|-------------------------------------|------------------------------------------------|------------------------------------------------|
| Volume                              | 1326.86(6)                                     | 1326.86(6)                                     |
| Space group                         | P 21/c                                         | P 1 21/c 1                                     |
| Hall group                          | -P 2ybc                                        | -P 2ybc                                        |
| Moiety formula                      | C <sub>16</sub> H <sub>20</sub> N <sub>2</sub> | C <sub>16</sub> H <sub>20</sub> N <sub>2</sub> |
| Sum formula                         | C <sub>16</sub> H <sub>20</sub> N <sub>2</sub> | C <sub>16</sub> H <sub>20</sub> N <sub>2</sub> |
| M <sub>r</sub>                      | 240.34                                         | 240.34                                         |
| D <sub>x</sub> , g cm <sup>-3</sup> | 1.203                                          | 1.203                                          |
| Z                                   | 4                                              | 4                                              |
| Mu (mm <sup>-1</sup> )              | 0.071                                          | 0.071                                          |
| F000                                | 520.0                                          | 520.0                                          |
| F000'                               | 520.16                                         |                                                |
| h,k,l <sub>max</sub>                | 15,6,23                                        | 15,6,23                                        |
| N <sub>ref</sub>                    | 2479                                           | 2477                                           |
| T <sub>min</sub> , T <sub>max</sub> | 0.992, 0.995                                   | 0.985, 1.000                                   |
| T <sub>min</sub> '                  | 0.965                                          |                                                |

Correction method = # Reported T Limits: T<sub>min</sub> = 0.985 T<sub>max</sub> = 1.000

AbsCorr = MULTI-SCAN

[Go back to table of contents](#)

Data completeness = 0.999

Theta(max) = 25.498

R(reflections) = 0.0412 (2373)

wR2(reflections)= 0.0985 (2477)

S = 1.020

N<sub>par</sub>= 172

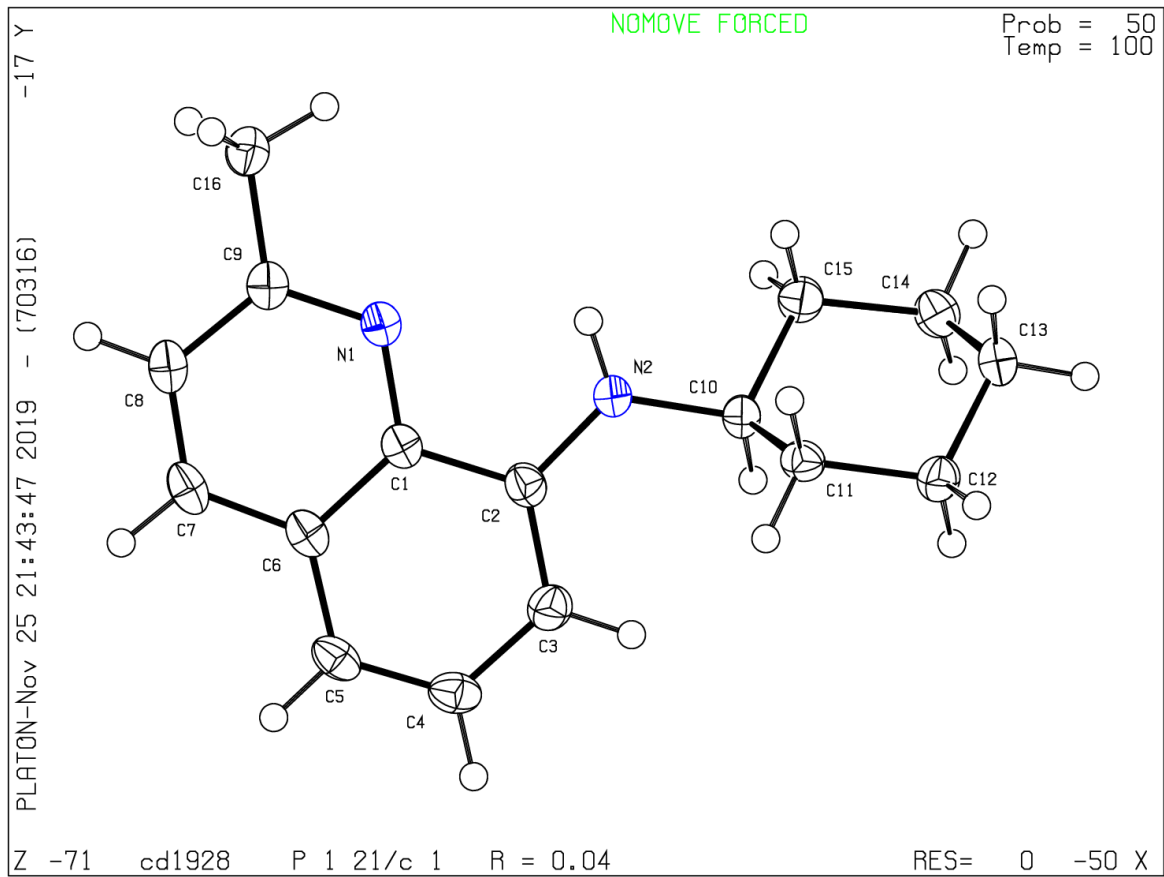



1-(Tetrahydro-2H-pyran-4-yl)-1H-indol-5-ol (83)

CCDC 1972876

---

Bond precision: C–C = 0.0020 Å Wavelength = 1.54184

Cell: a = 7.8676(1) b = 16.1982(2) c = 10.7102(1)

$\alpha = 90$   $\beta = 104.304(1)$   $\gamma = 90$

Temperature: 100 K

|                                     | Calculated                                                                   | Reported                                                                     |
|-------------------------------------|------------------------------------------------------------------------------|------------------------------------------------------------------------------|
| Volume                              | 1322.60(3)                                                                   | 1322.60(3)                                                                   |
| Space group                         | P 21/c                                                                       | P 1 21/c 1                                                                   |
| Hall group                          | -P 2ybc                                                                      | -P 2ybc                                                                      |
| Moiety formula                      | C <sub>27</sub> H <sub>3</sub> N <sub>2</sub> O <sub>4</sub> Cl <sub>3</sub> | C <sub>27</sub> H <sub>3</sub> N <sub>2</sub> O <sub>4</sub> Cl <sub>3</sub> |
| Sum formula                         | C <sub>27</sub> H <sub>3</sub> N <sub>2</sub> O <sub>4</sub> Cl <sub>3</sub> | C <sub>27</sub> H <sub>3</sub> N <sub>2</sub> O <sub>4</sub> Cl <sub>3</sub> |
| Mr                                  | 553.89                                                                       | 553.89                                                                       |
| D <sub>x</sub> , g cm <sup>-3</sup> | 1.391                                                                        | 1.391                                                                        |
| Z                                   | 2                                                                            | 2                                                                            |
| Mu (mm <sup>-1</sup> )              | 3.437                                                                        | 3.437                                                                        |
| F <sub>000</sub>                    | 580.0                                                                        | 580.0                                                                        |
| F <sub>000</sub> '                  | 583.63                                                                       |                                                                              |
| h,k,l <sub>max</sub>                | 9,20,13                                                                      | 9,20,13                                                                      |
| N <sub>ref</sub>                    | 2789                                                                         | 2654                                                                         |
| T <sub>min</sub> , T <sub>max</sub> | 0.814, 0.851                                                                 | 0.749, 1.000                                                                 |
| T <sub>min</sub> '                  | 0.579                                                                        |                                                                              |

Correction method = # Reported T Limits: T<sub>min</sub> = 0.749 T<sub>max</sub> = 1.000

AbsCorr = GAUSSIAN

[Go back to table of contents](#)

Data completeness = 0.952

Theta(max) = 76.532

R(reflections) = 0.0413 (2425)

wR2(reflections) = 0.0989 (2654)

S = 1.000

N<sub>par</sub> = 184

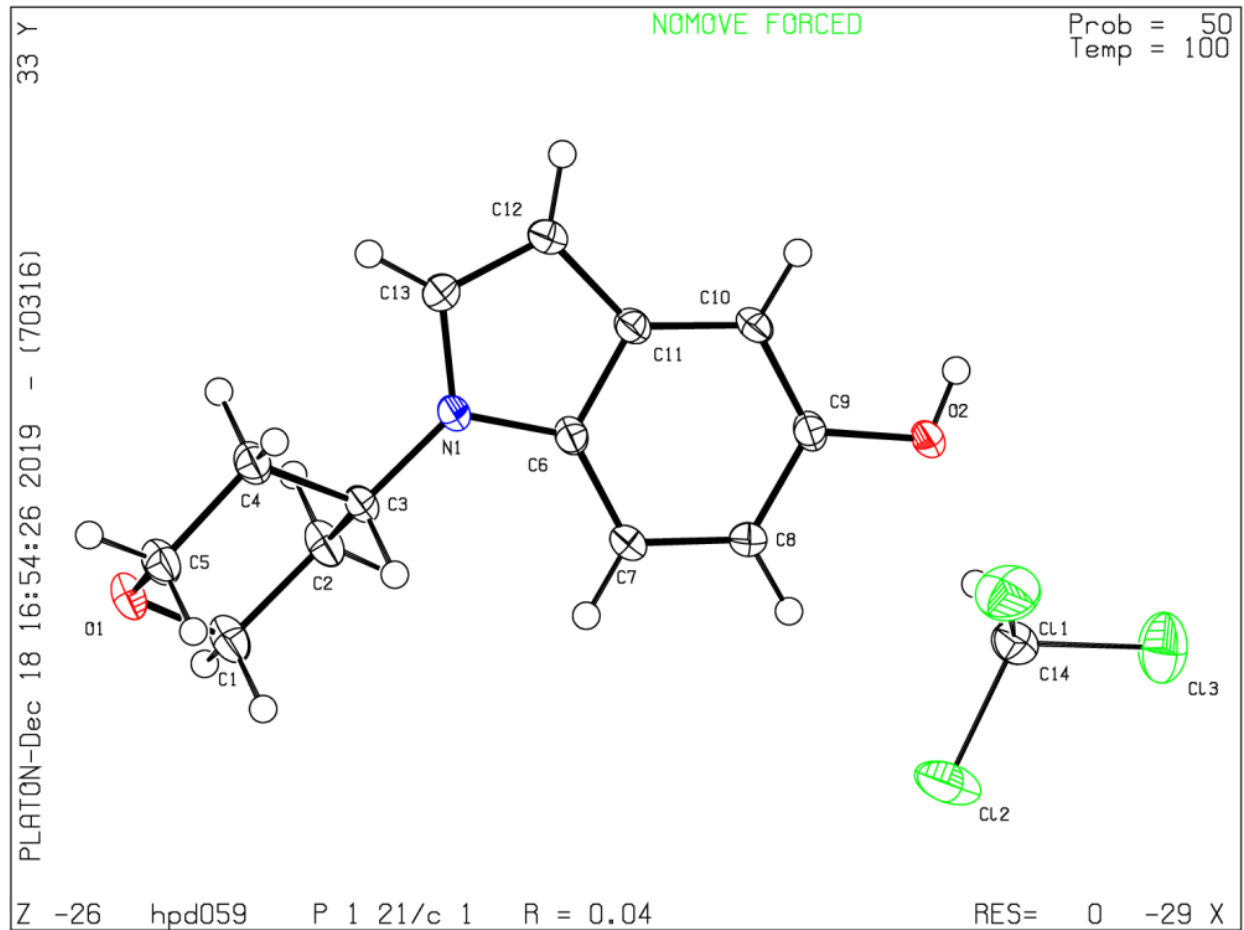

## Computational Data

All geometry optimizations, vibrational frequency calculations, and IRCs were conducted using the Gaussian 16 program.<sup>37</sup> Calculations were performed using the Stampede2 supercomputer at the Texas Advanced Computing Center (TACC) hosted by the University of Texas in Austin, Texas.<sup>38</sup> General day-to-day visualization and monitoring of calculations was performed with Chemcraft.<sup>39</sup> Final images of minima and transition state geometries were rendered using CYLview.<sup>40</sup> Geometries of ground state minima and transition states were optimized without constraints using the M06-L functional<sup>41</sup> with the def2-SVP<sup>42,43</sup> basis set in the SMD solvation model,<sup>44</sup> based on their demonstrated performance with copper complexes.<sup>45</sup> Convergence criteria for these calculations was set to “tight” and an ultrafine grid was selected. Frequency calculations were performed on the resultant geometries to verify the nature of the isolated stationary points. Geometries with zero imaginary frequencies were deemed minima whereas those with exactly one imaginary frequency along the chemical path of interest were deemed transition states. IRC calculations were performed to further corroborate that the located transition states connected reactants to products.

### Marcus theory-based estimation of activation barrier for the anilinium E-assisted proton-coupled electron transfer

The activation barrier for the proton coupled electron transfer (PCET) process were calculated using Marcus-Hush theory<sup>46</sup> in conjunction with the Savéant model.<sup>47,48</sup>

$$\Delta G_{PCET}^{\ddagger} = \Delta G_0^{\ddagger} \left( 1 + \frac{\Delta G_r}{4\Delta G_0^{\ddagger}} \right)^2 \quad (1)$$

The intrinsic barrier,  $\Delta G_0^{\ddagger}$ , is estimated by calculating  $\lambda_{PCET}$ , the sum of internal and solvent reorganization energies:

$$\Delta G_0^\ddagger = \frac{\lambda_{PCET}}{4} = \frac{\lambda_i + \lambda_0}{4} = \frac{\lambda_i + (\lambda_0^{ET} + \lambda_0^{PT})}{4} \quad (2)$$

The internal reorganization energy,  $\lambda_i$ , is calculated using the Savéant model as:

$$\lambda_i = \frac{\lambda_i^R + \lambda_i^P}{2} \quad (3)$$

Where  $\lambda_i^R$  and  $\lambda_i^P$  are the difference between distorted and equilibrium geometries for reactants and products, respectively.

The solvent reorganization energy,  $\lambda_0$ , is separated into two components, one related to electron transfer (4) and the other related to proton transfer (5):

$$\lambda_s^{ET} = \left(332 \frac{kcal}{mol}\right) \left(\frac{1}{2a_1} + \frac{1}{2a_2} - \frac{1}{R_{12}}\right) \left(\frac{1}{\varepsilon_{op}} - \frac{1}{\varepsilon_s}\right) \quad (4)$$

$$\lambda_s^{PT} = \frac{1}{4\pi\varepsilon_0} \left(\frac{\varepsilon_s - 1}{2\varepsilon_s + 1} - \frac{\varepsilon_{op} - 1}{\varepsilon_{op} + 1}\right) \frac{(\mu_R - \mu_P)^2}{a^3} \quad (5)$$

Where  $a_1$  and  $a_2$  are the radii of the donor and acceptor species and  $R_{12}$  is the inter-center distance.  $\varepsilon_{op}$  is the square of the refractive index and  $\varepsilon_s$  the dielectric constant;  $a^3$  is the total radius of the encounter complex.  $\mu_R - \mu_P$  is the difference between reactant and product dipole moments.

The intrinsic barrier also contains a contribution from the bond dissociation free energy of the acceptor species:

$$\Delta G_0^\ddagger = \frac{\lambda_{PCET}}{4} = \frac{\lambda_i + (\lambda_0^{ET} + \lambda_0^{PT}) + BDFE}{4} \quad (6)$$

The BDFE is calculated for:

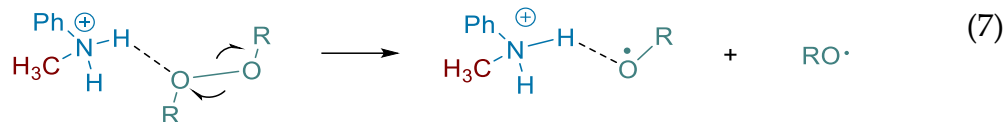

**Table S4. PCET values <sup>a</sup>**

| a1 / Å | a2 / Å | $\lambda_i$ | $\lambda_s$ | Sum ( $\lambda_i + \lambda_s$ ) | $\lambda_{PT}$ | BDFE  | $\Delta G_{rxn}$ | $\Delta G_{PCET}^\ddagger$ |
|--------|--------|-------------|-------------|---------------------------------|----------------|-------|------------------|----------------------------|
| 5.38   | 5.72   | 59.40       | 11.42       | 70.81                           | 1.22           | 14.44 | -38.15           | 6.67                       |

<sup>a</sup> a1 is the radius of the donor species, a2 the radius of the acceptor species,  $\lambda_i$  is the internal reorganization energy,  $\lambda_0$  is the solvent reorganization energy, BDFE is the O–O bond dissociation free energy of the PhCH<sub>3</sub>NH<sub>2</sub><sup>+</sup>–DTBP complex,  $\Delta G_{rxn}$  the Gibbs free energy of the concerted DET process, and  $\Delta G_{ET}^\ddagger$  is the calculated activation barrier of the electron transfer processes. Reorganization and free energy entries are expressed in kcal/mol.

### Relaxed PES scan of the Cu–CH<sub>3</sub> bond in complex C

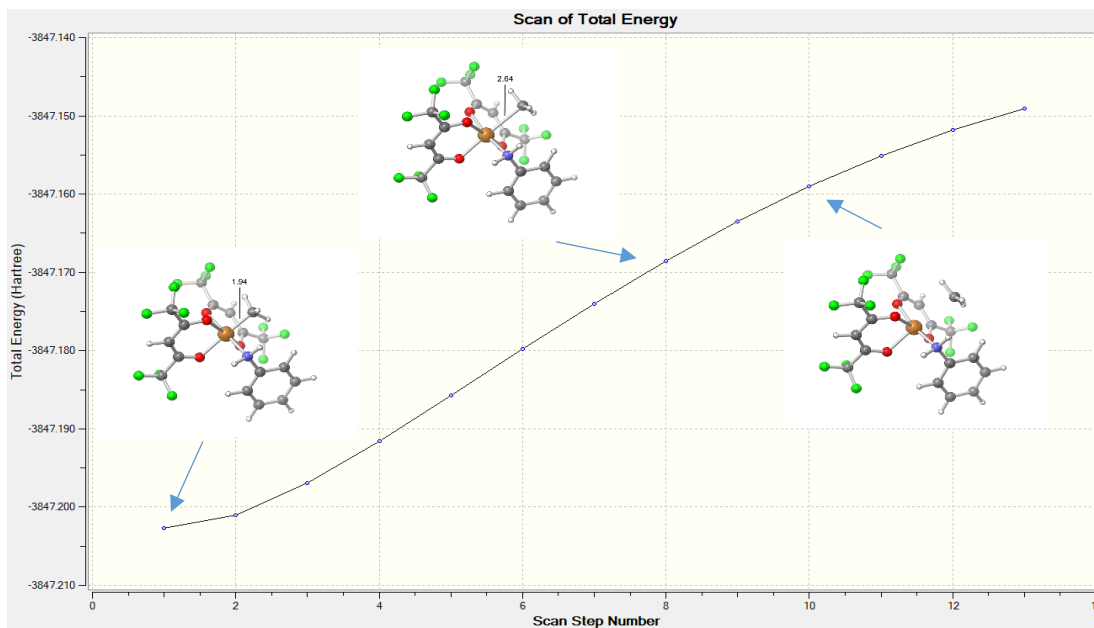

A relaxed scan of the Cu–CH<sub>3</sub> bond length was conducted at the uM06-L / def2-SVP / SMD level of theory to probe for the presence of a barrier to the addition of methyl radical. Scanning began from the optimized bond distance from Cu(III)–NH<sub>2</sub>Ph (1.94442 Å). An interval of 0.1 Å was selected for the scan, and 13 geometries were obtained. The final Cu–C bond distance was 3.14442 Å. Cleavage of the bond occurred between points 9 and 10, corresponding to distances of 2.74442 Å and 2.84442 Å, respectively. The scan indicated that the addition proceeds without a barrier.

## Optimized Geometries

### Cu(hfac)<sub>2</sub>

E(UM06L) = -3519.97640884

Zero-point correction= 0.134866 (Hartree/Particle)

Thermal correction to Energy= 0.160248

Thermal correction to Enthalpy= 0.161193

Thermal correction to Gibbs Free Energy= 0.073568

Sum of electronic and ZPE= -3519.841543

Sum of electronic and thermal Energies= -3519.816160

Sum of electronic and thermal Enthalpies= -3519.815216

Sum of electronic and thermal Free Energies= -3519.902841

|       | E, kcal/mol | CV, cal/(mol·K) | S, cal/(mol·K) |
|-------|-------------|-----------------|----------------|
| Total | 100.557     | 88.795          | 184.421        |

Cu,0,-0.0357414503,0.8439909431,-0.059591722  
C,0,-0.5608407008,3.6655565391,-0.222437761  
C,0,-1.8947525767,3.5447247842,0.1852083553  
C,0,-2.442323333,2.3038579357,0.5097184037  
H,0,-2.5121649637,4.4391859229,0.2519426902  
O,0,0.2965592745,2.75915581,-0.3503128308  
O,0,-1.8854951638,1.1741741439,0.4816861618  
C,0,-0.0781939539,5.0808014522,-0.5786534937  
C,0,-3.898067019,2.2342629783,0.9841838972  
F,0,1.2246622026,5.1080713097,-0.8237678928  
F,0,-0.7187580986,5.5241115475,-1.6687143815  
F,0,-0.3367463032,5.9375997005,0.4159972895  
F,0,-4.5843113927,1.3603138377,0.2442994861  
F,0,-4.5231157361,3.4109015826,0.9172071136  
F,0,-3.9418252745,1.8170402759,2.2542111879  
C,0,0.4797065307,-1.9849100638,0.0327000926  
C,0,1.7899494085,-1.871142121,-0.4390935266  
C,0,2.3433378758,-0.6217187885,-0.730482901  
H,0,2.3898500573,-2.7676602676,-0.5759785404  
O,0,-0.36023587,-1.0687272784,0.224377695  
O,0,1.8114244449,0.5125690814,-0.61408053

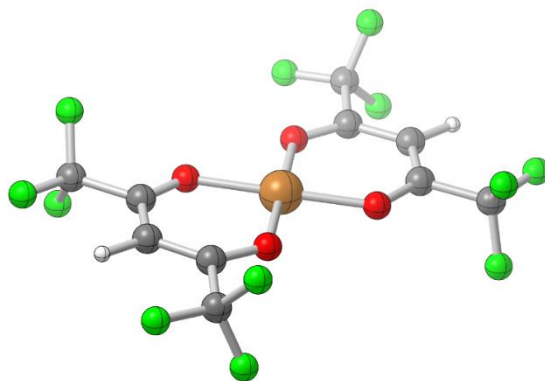

C,0,-0.0677481116,-3.3715205567,0.3913966996  
 C,0,3.7835488392,-0.5476355423,-1.2519198149  
 F,0,-1.1833764507,-3.619639016,-0.2988754734  
 F,0,0.7989567975,-4.3542918976,0.1433849744  
 F,0,-0.3749153664,-3.4117073077,1.6919498456  
 F,0,3.8177983598,0.1324964226,-2.4004437624  
 F,0,4.321913853,-1.7486094929,-1.4680688118  
 F,0,4.5551530711,0.0979060454,-0.3714682101

## Aniline

E(RM06L) = -287.374709231

Zero-point correction= 0.117119 (Hartree/Particle)

Thermal correction to Energy= 0.122853

Thermal correction to Enthalpy= 0.123797

Thermal correction to Gibbs Free Energy= 0.088050

Sum of electronic and ZPE= -287.257590

Sum of electronic and thermal Energies= -287.251856

Sum of electronic and thermal Enthalpies= -287.250912

Sum of electronic and thermal Free Energies= -287.286659

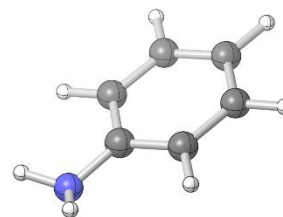

|       | E, kcal/mol | CV, cal/(mol·K) | S, cal/(mol·K) |
|-------|-------------|-----------------|----------------|
| Total | 77.091      | 23.153          | 75.236         |

C,0,-0.688483039,1.1776204614,-0.0775262461  
 C,0,0.7139596408,1.2073520477,0.0603926811  
 C,0,1.344361984,2.4645268021,0.1550003163  
 C,0,0.5975255747,3.6382919046,0.1172143717  
 C,0,-0.7924542924,3.6012297442,-0.0168969896  
 C,0,-1.4237069537,2.3588017844,-0.1141561907  
 H,0,-1.1933879597,0.2104113069,-0.1551275583  
 H,0,2.4323727106,2.5059171128,0.2598937774  
 H,0,1.1138002601,4.5995375925,0.1911686594  
 H,0,-1.3739136288,4.5252023301,-0.0479055378  
 H,0,-2.5104741937,2.3052931671,-0.2242271697  
 N,0,1.441348315,0.0410090963,0.1578199117  
 H,0,1.0089959113,-0.7874300273,-0.2355160692  
 H,0,2.4261950428,0.1094861482,-0.0729130671

[Go back to table of contents](#)

## Complex B

E(UM06L) = -3807.37553291

Zero-point correction= 0.254315 (Hartree/Particle)

Thermal correction to Energy= 0.287170

Thermal correction to Enthalpy= 0.288114

Thermal correction to Gibbs Free Energy= 0.181893

Sum of electronic and ZPE= -3807.121218

Sum of electronic and thermal Energies= -3807.088363

Sum of electronic and thermal Enthalpies= -3807.087419

Sum of electronic and thermal Free Energies= -3807.193639

|       | E, kcal/mol | CV, cal/(mol·K) | S, cal/(mol·K) |
|-------|-------------|-----------------|----------------|
| Total | 180.202     | 116.465         | 223.56         |

|      |               |              |               |
|------|---------------|--------------|---------------|
| Cu,0 | 0.1661212962  | 0.5947301035 | -0.6598318539 |
| C,0  | -0.3259356915 | 3.4320554977 | -0.4349760549 |
| C,0  | -1.6788285644 | 3.2505342114 | -0.1033199373 |
| C,0  | -2.2208478379 | 1.9893611173 | 0.1350323963  |
| H,0  | -2.3100691671 | 4.1298340372 | 0.0158038187  |
| O,0  | 0.5529334811  | 2.5632197707 | -0.6219708513 |
| O,0  | -1.658203123  | 0.864550193  | 0.0515791473  |
| C,0  | 0.1432934799  | 4.8909719802 | -0.5549245303 |
| C,0  | -3.6790764031 | 1.8835320105 | 0.59077909    |
| F,0  | 1.4007456709  | 4.9724988242 | -0.9712228578 |
| F,0  | -0.6265391024 | 5.5714458527 | -1.4141581912 |
| F,0  | 0.0575379405  | 5.5070942949 | 0.6332637305  |
| F,0  | -4.3554997815 | 1.0515088076 | -0.2074174679 |
| F,0  | -4.3171759768 | 3.0552041046 | 0.596580325   |
| F,0  | -3.7315374892 | 1.3831515133 | 1.8321194823  |
| C,0  | 0.457199434   | 0.7443435705 | -3.6854522458 |
| C,0  | 1.8513730804  | 0.5452800556 | -3.5814269605 |
| C,0  | 2.5021630019  | 0.2897415907 | -2.3756107221 |
| H,0  | 2.4511478251  | 0.5806245518 | -4.48792976   |
| O,0  | -0.3970653774 | 0.7229996526 | -2.7828565842 |
| O,0  | 2.0372195384  | 0.2184762888 | -1.2065876588 |
| C,0  | -0.1220324579 | 1.0145347076 | -5.0839644483 |

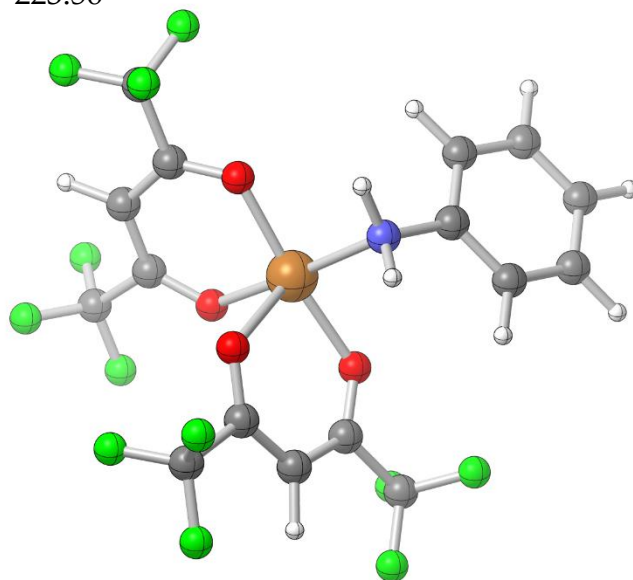



C,0,4.0120396467,0.0228641256,-2.4031464935  
 F,0,-0.746668986,2.1990825808,-5.101873708  
 F,0,0.7940561892,1.026535255,-6.058652074  
 F,0,-1.0294604208,0.07864087,-5.3945824893  
 F,0,4.6534949879,0.8847129502,-1.6069598647  
 F,0,4.5520567691,0.1157045419,-3.6215260557  
 F,0,4.2649619873,-1.2116615043,-1.9424478106  
 N,0,-0.1690818162,-1.4416428915,-0.4389403278  
 H,0,-0.0488650684,-1.8648265796,-1.3611185811  
 H,0,-1.1571687717,-1.5040300529,-0.185497915  
 C,0,0.6799616429,-2.0259029112,0.5343521127  
 C,0,1.8771977928,-2.6370910807,0.1457596188  
 C,0,0.3496642098,-1.9267395226,1.8912688164  
 C,0,2.7343466459,-3.1530058722,1.1136522669  
 H,0,2.1290289116,-2.7027604778,-0.9151853188  
 C,0,1.2124263046,-2.4489555896,2.8506665691  
 H,0,-0.5837355807,-1.4372269589,2.1828104464  
 C,0,2.4073013392,-3.0621248953,2.4677710434  
 H,0,3.666887154,-3.6308905056,0.804475036  
 H,0,0.9481311896,-2.3749874162,3.908018238  
 H,0,3.0823425573,-3.4686761275,3.2238734548

## Methyl Radical

E(UM06L) = -39.7948461124

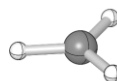

Zero-point correction= 0.028577 (Hartree/Particle)

Thermal correction to Energy= 0.031974

Thermal correction to Enthalpy= 0.032918

Thermal correction to Gibbs Free Energy= 0.008417

Sum of electronic and ZPE= -39.766269

Sum of electronic and thermal Energies= -39.762872

Sum of electronic and thermal Enthalpies= -39.761928

Sum of electronic and thermal Free Energies= -39.786429

|       | E, kcal/mol | CV, cal/(mol·K) | S, cal/(mol·K) |
|-------|-------------|-----------------|----------------|
| Total | 20.064      | 8.06            | 51.567         |

C,0,-1.3230997557,1.2857142677,0.0

[Go back to table of contents](#)

H,0,-2.4137566334,1.2857142688,0.0  
H,0,-0.7776660837,2.2301594816,0.0  
H,0,-0.7776660872,0.3412690518,0.0

## Complex C

E(RM06L) = -3847.20267479

Zero-point correction= 0.290147 (Hartree/Particle)

Thermal correction to Energy= 0.325205

Thermal correction to Enthalpy= 0.326149

Thermal correction to Gibbs Free Energy= 0.218788

Sum of electronic and ZPE= -3846.912528

Sum of electronic and thermal Energies= -3846.877470

Sum of electronic and thermal Enthalpies= -3846.876526

Sum of electronic and thermal Free Energies= -3846.983886

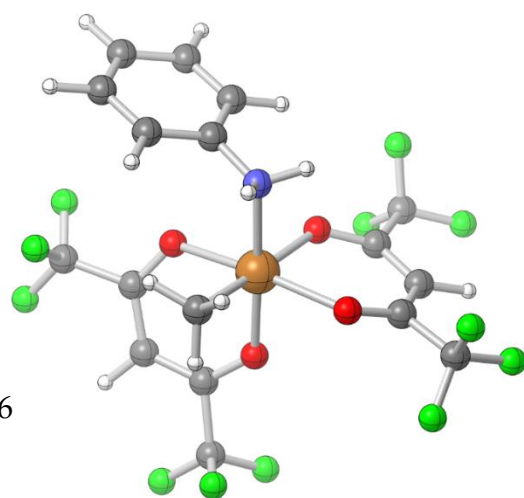

|       | E, kcal/mol | CV, cal/(mol·K) | S, cal/(mol·K) |
|-------|-------------|-----------------|----------------|
| Total | 204.069     | 125.599         | 225.96         |

C,0,1.6435326579,3.0109243654,-0.4247730906  
C,0,0.6535732462,3.224816089,0.5336219326  
C,0,-0.3112261141,2.2495888317,0.8588298904  
H,0,0.5981193495,4.1994775704,1.0128997939  
C,0,3.6806270622,-1.5641200976,-1.1130123543  
C,0,3.0747531579,-0.9583625723,1.1795001186  
C,0,3.8125124934,-1.730078037,0.2839158025  
H,0,4.4652343585,-2.5095708708,0.6720694165  
Cu,0,1.1752490651,0.1525819575,-0.7678148774  
O,0,3.012836947,-0.7040666774,-1.7067655835  
O,0,2.230896197,-0.0521683407,0.9358525866  
O,0,-0.4352569043,1.0990586763,0.4021062104  
O,0,1.9144159574,1.9702725471,-1.0795004426  
C,0,2.5578729469,4.1798846022,-0.8066073565  
C,0,-1.3973283592,2.6265640098,1.8792815577  
C,0,4.3583358597,-2.5871854899,-2.0352397579  
C,0,3.1995667701,-1.2593508198,2.6758400316  
F,0,3.8402288896,3.8528550923,-0.6158253183

[Go back to table of contents](#)

F,0,2.4067492588,4.4667546111,-2.1093406596  
F,0,2.3158338332,5.2981168564,-0.1179870816  
F,0,-2.6035851877,2.5921680837,1.2937211985  
F,0,-1.4152321075,1.7430241984,2.8837332635  
F,0,-1.2443123485,3.8432674219,2.4125140264  
F,0,4.9286495927,-1.9884088153,-3.0827720361  
F,0,3.4223858536,-3.428821489,-2.5151397258  
F,0,5.2909489988,-3.3297660283,-1.4286792241  
F,0,2.0640333774,-1.830290942,3.111977337  
F,0,4.2053714885,-2.0879062835,2.9719713709  
F,0,3.3770377843,-0.1364963103,3.3781690401  
N,0,0.1313058407,0.3069570522,-2.5448220822  
H,0,-0.1604709441,1.2869242168,-2.5224008737  
C,0,0.9486910124,0.0117588317,-3.6651051229  
C,0,1.8006466696,0.9935323284,-4.182361318  
C,0,0.9671632269,-1.2875075331,-4.1843137568  
C,0,2.6747971284,0.6660223084,-5.2135326964  
H,0,1.7895461271,1.9993028382,-3.7563117795  
C,0,1.8460150423,-1.6034822245,-5.2151127577  
H,0,0.2958245139,-2.0445839096,-3.7700299699  
C,0,2.7073870592,-0.6318194646,-5.7280536534  
H,0,3.3420727617,1.4315738741,-5.6156122745  
H,0,1.8627880557,-2.6194471153,-5.6161218924  
H,0,3.4021652909,-0.8850874494,-6.5317134336  
C,0,0.4127174106,-1.622457823,-0.547444911  
H,0,-0.671104998,-1.4994690627,-0.6521724973  
H,0,0.8752278679,-2.2330847212,-1.3332933208  
H,0,0.7012069783,-1.9053572411,0.4706099535  
H,0,-0.7109922476,-0.2700764258,-2.514445958

## TS<sub>Cu</sub>

E(RM06L) = -3847.17146115

Zero-point correction= 0.289406 (Hartree/Particle)

Thermal correction to Energy= 0.324011

Thermal correction to Enthalpy= 0.324955

Thermal correction to Gibbs Free Energy= 0.220636

Sum of electronic and ZPE= -3846.882056

Sum of electronic and thermal Energies= -3846.847450

[Go back to table of contents](#)

Sum of electronic and thermal Enthalpies= -3846.846506  
Sum of electronic and thermal Free Energies= -3846.950825

|       | E, kcal/mol | CV, cal/(mol·K) | S, cal/(mol·K) |
|-------|-------------|-----------------|----------------|
| Total | 203.32      | 124.389         | 219.559        |

C,0,2.137960561,2.636960166,-0.113785922  
C,0,0.968407187,3.133002903,0.490871257  
C,0,-0.253740298,2.454602865,0.459334423  
H,0,1.00522054,4.108381159,0.970992471  
C,0,3.231366658,-1.282312541,-1.46533955  
C,0,2.879349195,-0.946073141,0.931851523  
C,0,3.724792307,-1.23074732,-0.16080013  
H,0,4.799836566,-1.294196177,-0.001767589  
Cu,0,0.809707923,0.135601534,-0.886712671  
O,0,2.036182922,-1.177047516,-1.854611396  
O,0,1.636819674,-0.854789083,0.930730499  
O,0,-0.525837161,1.317890194,-0.005622918  
O,0,2.29997842,1.564932783,-0.730865385  
C,0,3.406018434,3.49887283,-0.066008665  
C,0,-1.492025114,3.173612597,1.001949949  
C,0,4.241180397,-1.364881235,-2.610441383  
C,0,3.534471262,-0.603858406,2.274915442  
F,0,4.422351918,2.797850407,0.451015206  
F,0,3.76085321,3.861312166,-1.30859248  
F,0,3.276207425,4.61735135,0.656576386  
F,0,-2.301049763,3.502195052,-0.02247113  
F,0,-2.189697943,2.377073036,1.817489515  
F,0,-1.216626423,4.297493638,1.669789965  
F,0,4.427346943,-0.137301783,-3.134141772  
F,0,3.789925997,-2.146147269,-3.600025228  
F,0,5.441225275,-1.827835248,-2.245074637  
F,0,2.939627365,-1.254182897,3.282541715  
F,0,4.843038599,-0.882873822,2.334044116  
F,0,3.394075591,0.71277988,2.514829203  
N,0,-0.428180759,-0.48012616,-3.05429974  
H,0,-1.382988033,-0.635941846,-3.381894457  
C,0,0.028143354,0.847000143,-3.281000282  
C,0,-0.796607658,1.927586775,-2.942634009

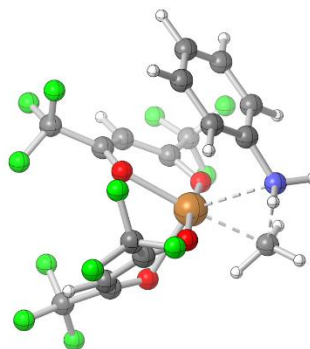

C,0,1.317321431,1.064528222,-3.782724145  
 C,0,-0.315163564,3.22464603,-3.086972763  
 H,0,-1.796180538,1.740931559,-2.542903546  
 C,0,1.785863623,2.367043701,-3.921880438  
 H,0,1.943088874,0.21042035,-4.045489608  
 C,0,0.977389041,3.448360827,-3.568502461  
 H,0,-0.951970081,4.067682763,-2.807889107  
 H,0,2.797299798,2.53489028,-4.299410187  
 H,0,1.356450729,4.468366866,-3.663616135  
 C,0,-0.846615677,-1.331354921,-1.207374952  
 H,0,-1.670802063,-0.68934646,-0.891747485  
 H,0,-1.149235417,-2.188219511,-1.810987044  
 H,0,-0.139942625,-1.644434953,-0.42424869  
 H,0,0.19435052,-1.18778035,-3.449144256

### Complex D

E(RM06L) = -3520.11571658

Zero-point correction= 0.131913 (Hartree/Particle)

Thermal correction to Energy= 0.158602

Thermal correction to Enthalpy= 0.159546

Thermal correction to Gibbs Free Energy= 0.068087

Sum of electronic and ZPE= -3519.983804

Sum of electronic and thermal Energies= -3519.957115

Sum of electronic and thermal Enthalpies= -3519.956170

Sum of electronic and thermal Free Energies= -3520.047630

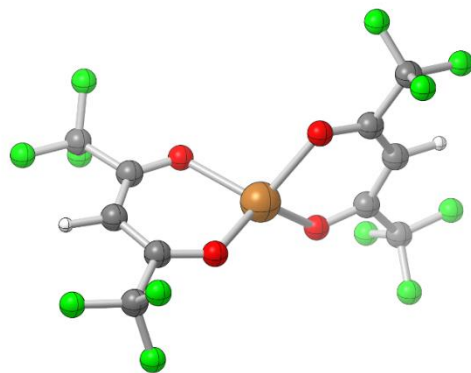

|       | E, kcal/mol | CV, cal/(mol·K) | S, cal/(mol·K) |
|-------|-------------|-----------------|----------------|
| Total | 99.524      | 90.696          | 192.492        |

Cu,0,0.1214960064,0.9326048226,0.1349631401  
 C,0,-0.5082532807,3.7078156773,0.6905058586  
 C,0,-1.8048131333,3.6431069342,0.1549832207  
 C,0,-2.3448899536,2.4780455972,-0.4196003175  
 H,0,-2.4341316864,4.528308,0.2184557044  
 O,0,0.3676563186,2.8116011386,0.7456261849  
 O,0,-1.8042014248,1.3672383942,-0.6057887246  
 C,0,-0.0547198637,5.0258380301,1.3207876937  
 C,0,-3.8084094368,2.5237168541,-0.875126341

[Go back to table of contents](#)

F,0,0.2854909231,4.8430202335,2.6070426455  
 F,0,1.0346204883,5.5005590927,0.6940039662  
 F,0,-0.9807898272,5.9946308104,1.2910791152  
 F,0,-3.9166647221,2.1634621552,-2.1632076461  
 F,0,-4.3901952951,3.7261359031,-0.750792337  
 F,0,-4.5442942296,1.6537932239,-0.1625750795  
 C,0,0.9849737239,-1.7694297547,0.7678036472  
 C,0,1.6433720548,-1.9614656119,-0.4581623366  
 C,0,1.6992968583,-0.9792112723,-1.4629227667  
 H,0,2.1556254384,-2.9061148563,-0.6281712853  
 O,0,0.3447539748,-0.7694710167,1.1695083218  
 O,0,1.1876249602,0.1613354619,-1.4791729096  
 C,0,1.0398812511,-2.8991768169,1.7988617358  
 C,0,2.5051281361,-1.2984085072,-2.727278478  
 F,0,-0.197737083,-3.2798663889,2.1521920175  
 F,0,1.6850997657,-3.9960584347,1.37693175  
 F,0,1.6547308608,-2.4839039506,2.9191224851  
 F,0,1.7464040467,-1.1444182183,-3.8233547295  
 F,0,3.0050709323,-2.542394506,-2.7644048835  
 F,0,3.5421231456,-0.4521350137,-2.8469354108

## Product E

E(RM06L) = -327.086825318

Zero-point correction= 0.160456 (Hartree/Particle)

Thermal correction to Energy= 0.167609

Thermal correction to Enthalpy= 0.168554

Thermal correction to Gibbs Free Energy= 0.128961

Sum of electronic and ZPE= -326.926369

Sum of electronic and thermal Energies= -326.919216

Sum of electronic and thermal Enthalpies= -326.918272

Sum of electronic and thermal Free Energies= -326.957865

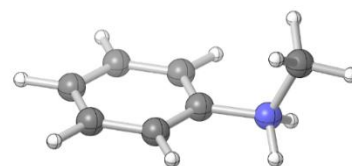

|       | E, kcal/mol | CV, cal/(mol·K) | S, cal/(mol·K) |
|-------|-------------|-----------------|----------------|
| Total | 105.177     | 27.592          | 83.33          |

C,0,-0.4280382114,1.2331028551,-0.4004308334

C,0,0.7875810403,1.3566117094,0.2634497083

[Go back to table of contents](#)

C,0,1.2479735644,2.5764973663,0.7458751104  
 C,0,0.4552154095,3.7081909031,0.5638901541  
 C,0,-0.7702609203,3.6066335439,-0.0946771458  
 C,0,-1.2105295442,2.3730667965,-0.5750884071  
 H,0,-0.7585635482,0.2598403144,-0.7702362861  
 H,0,2.208557018,2.6372882718,1.2630381143  
 H,0,0.7988362966,4.672293301,0.9432239998  
 H,0,-1.3886459322,4.4958962709,-0.2323885943  
 H,0,-2.1709167239,2.2927107922,-1.0876835368  
 N,0,1.6319497525,0.1681970373,0.4235943915  
 H,0,1.036065062,-0.6579247855,0.5633857177  
 C,0,2.5594665837,-0.0890126419,-0.7104249682  
 H,0,3.2192872045,0.775616407,-0.8220793991  
 H,0,3.1414207171,-0.9880674047,-0.4895643896  
 H,0,1.9673622001,-0.2318114661,-1.6183273112  
 H,0,2.1764278625,0.2510674275,1.2918272635

### Ph CH<sub>3</sub>NH<sub>2</sub><sup>+</sup>-DTBP complex

E(RM06L) = -792.760945916

Zero-point correction= 0.412631 (Hartree/Particle)

Thermal correction to Energy= 0.433922

Thermal correction to Enthalpy= 0.434866

Thermal correction to Gibbs Free Energy= 0.363702

Sum of electronic and ZPE= -792.348315

Sum of electronic and thermal Energies= -792.327024

Sum of electronic and thermal Enthalpies= -792.326080

Sum of electronic and thermal Free Energies= -792.397244

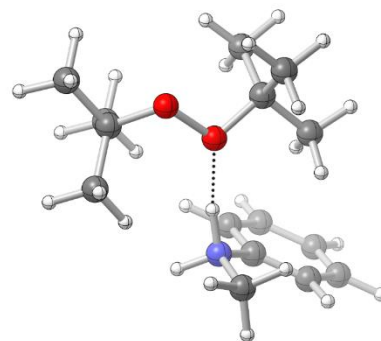

|       | E, kcal/mol | CV, cal/(mol·K) | S, cal/(mol·K) |
|-------|-------------|-----------------|----------------|
| Total | 272.29      | 82.461          | 149.778        |

C,0,3.4049661534,4.4118550299,-5.753288197  
 C,0,2.8529133563,4.7640636819,-4.5234480601  
 C,0,2.6101165273,6.0884136949,-4.1828801607  
 C,0,2.9299579881,7.0847075138,-5.1071798425  
 C,0,3.4796340468,6.752723578,-6.3433184951  
 C,0,3.7195169208,5.4156573798,-6.6646630245

[Go back to table of contents](#)

H,0,3.5809162363,3.3605061949,-5.9944872385  
H,0,2.1730281172,6.3576862853,-3.2210825248  
H,0,2.742838116,8.1294079936,-4.8514252037  
H,0,3.7244582277,7.5387781979,-7.0604201258  
H,0,4.152819918,5.1494767348,-7.6306404293  
N,0,2.4869808077,3.6645750316,-3.6174132618  
H,0,3.3054752419,3.050083113,-3.5144486533  
C,0,1.9819497133,4.0149773009,-2.2743875027  
H,0,1.061934065,4.5977495282,-2.3745898402  
H,0,1.7687981134,3.0850355705,-1.7392577616  
H,0,2.740081499,4.5915617531,-1.7364430129  
H,0,1.7636603579,3.0695109316,-4.0853311264  
C,0,1.0871582305,-0.0189388498,-4.5318965012  
C,0,1.8165540922,0.1045363639,-3.2050206964  
H,0,2.2253164946,1.1113715585,-3.0530698537  
H,0,1.1429398783,-0.1168651755,-2.3659045199  
H,0,2.6619765434,-0.5958368818,-3.1583092137  
C,0,1.9770623468,0.3450632478,-5.7052442221  
H,0,1.436437682,0.2609206607,-6.6575801727  
H,0,2.367778435,1.3687691791,-5.6212537075  
H,0,2.8392956683,-0.3349651886,-5.745989837  
O,0,-0.1171653571,0.7781047,-4.5090364164  
O,0,0.1996251022,2.2058885327,-4.5410047338  
C,0,-0.810426712,2.8486385023,-5.3764501899  
C,0,-0.7219896119,2.3297274115,-6.7985283122  
H,0,-0.9554530214,1.258404705,-6.8494223379  
H,0,-1.4404855992,2.8611522559,-7.4380920206  
H,0,0.2822387999,2.4905681039,-7.2166769018  
C,0,-2.1806954008,2.612754513,-4.7680386964  
H,0,-2.2140833999,2.9668126097,-3.7281518144  
H,0,-2.9465619049,3.1565762017,-5.3377443749  
H,0,-2.4460995098,1.548576933,-4.77852427  
C,0,-0.4273487046,4.3149146808,-5.3057693113  
H,0,0.5218069439,4.5149277355,-5.8228962474  
H,0,-1.1995430229,4.9195200654,-5.7996873529  
H,0,-0.3528872088,4.6617699326,-4.264429353  
C,0,0.5065762695,-1.4137654069,-4.6963311489  
H,0,-0.0254640436,-1.5117159656,-5.652245958  
H,0,1.3125947981,-2.1590560212,-4.6735274427  
H,0,-0.1943557741,-1.6474415571,-3.8835668026



## Ph CH<sub>3</sub>NH<sub>2</sub><sup>+</sup>-*t*BuOH complex

E(RM06L) = -560.128810652

Zero-point correction= 0.281943 (Hartree/Particle)

Thermal correction to Energy= 0.297434

Thermal correction to Enthalpy= 0.298378

Thermal correction to Gibbs Free Energy= 0.236890

Sum of electronic and ZPE= -559.846868

Sum of electronic and thermal Energies= -559.831376

Sum of electronic and thermal Enthalpies= -559.830432

Sum of electronic and thermal Free Energies= -559.891921

|       | E, kcal/mol | CV, cal/(mol·K) | S, cal/(mol·K) |
|-------|-------------|-----------------|----------------|
| Total | 186.643     | 57.556          | 129.414        |

C,0,0.2150995169,1.183552392,-0.4757014854  
C,0,1.0908899255,1.622584622,0.6915264826  
H,0,2.1295379292,1.2846945933,0.5461806723  
H,0,1.1023725647,2.7188505234,0.7804872162  
H,0,0.7411557997,1.2066226965,1.6482391554  
C,0,0.2285982246,-0.3353606268,-0.604158858  
H,0,-0.3405579577,-0.6547746921,-1.489873318  
H,0,1.2569924752,-0.7144725259,-0.7096303781  
H,0,-0.2121661755,-0.8237505917,0.2780353762  
O,0,0.6935851685,1.7785937049,-1.6815883936  
H,0,1.6259751733,1.516824227,-1.791131268  
C,0,4.2605167592,-0.5482924279,-0.8736258235  
C,0,3.6444476609,-0.2878253278,-2.114185187  
C,0,3.1962798004,-1.3783095098,-2.8818525561  
C,0,3.3418969362,-2.6806160182,-2.4042177523  
C,0,3.9404178666,-2.932179599,-1.1701398899  
C,0,4.4029507344,-1.8516565551,-0.4125222608  
H,0,4.6225959716,0.2927647349,-0.2749321937  
H,0,2.724424387,-1.2086853468,-3.8517422278  
H,0,2.9819996718,-3.5123924113,-3.0158849404  
H,0,4.0524337703,-3.9551477899,-0.8044613493  
H,0,4.8844976898,-2.0263408865,0.553402017

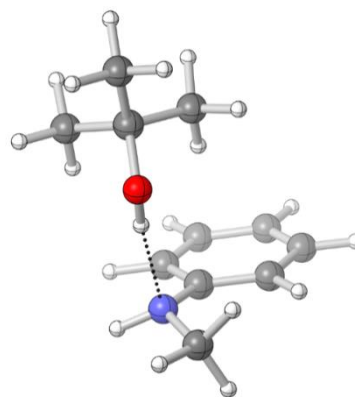

N,0,3.4411894406,1.0244958879,-2.517516179  
H,0,4.0790248868,1.6856374837,-2.0841753786  
C,0,3.1092191016,1.3318605603,-3.8878714539  
H,0,2.1144995383,0.9392361335,-4.1454682714  
H,0,3.0687266541,2.4202601071,-4.0103474297  
H,0,3.8332671672,0.928045708,-4.618178122  
C,0,-1.2046894064,1.692877622,-0.3056864836  
H,0,-1.8277980893,1.3976340555,-1.162373547  
H,0,-1.6687651377,1.2933301953,0.6068780885  
H,0,-1.2186009383,2.7907192414,-0.2442199012

### Radical F

E(UM06L) = -232.802974025

Zero-point correction= 0.121527 (Hartree/Particle)

Thermal correction to Energy= 0.128021

Thermal correction to Enthalpy= 0.128966

Thermal correction to Gibbs Free Energy= 0.092060

Sum of electronic and ZPE= -232.681447

Sum of electronic and thermal Energies= -232.674953

Sum of electronic and thermal Enthalpies= -232.674008

Sum of electronic and thermal Free Energies= -232.710914

|       | E, kcal/mol | CV, cal/(mol·K) | S, cal/(mol·K) |
|-------|-------------|-----------------|----------------|
| Total | 80.335      | 23.834          | 77.675         |

C,0,0.4014713626,1.6330242175,0.02628622  
C,0,0.9245796523,2.7556355868,0.9210271936  
H,0,2.0239083707,2.7522589976,0.9339571796  
H,0,0.5922794149,3.7354039536,0.5515034515  
H,0,0.5753327163,2.6377779616,1.9567207802  
C,0,0.8350309447,0.257261954,0.530045578  
H,0,0.4389081114,-0.5373445971,-0.1169392833  
H,0,1.9316920225,0.1796597013,0.5309214097  
H,0,0.4840289247,0.0778767257,1.5562524148  
O,0,0.7687714601,1.8236718692,-1.2784433077  
C,0,-1.1448709865,1.6996877037,-0.0452054385  
H,0,-1.5398145543,1.5564464583,0.9704907502

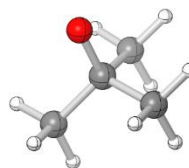

H,0,-1.4782119479,2.6747459223,-0.4224327934  
H,0,-1.5418559515,0.9104804355,-0.6961262246

### Radical G

E(UM06L) = -1246.04552669

Zero-point correction= 0.264576 (Hartree/Particle)

Thermal correction to Energy= 0.280344

Thermal correction to Enthalpy= 0.281288

Thermal correction to Gibbs Free Energy= 0.219964

Sum of electronic and ZPE= -1245.780951

Sum of electronic and thermal Energies= -1245.765183

Sum of electronic and thermal Enthalpies= -1245.764239

Sum of electronic and thermal Free Energies= -1245.825563

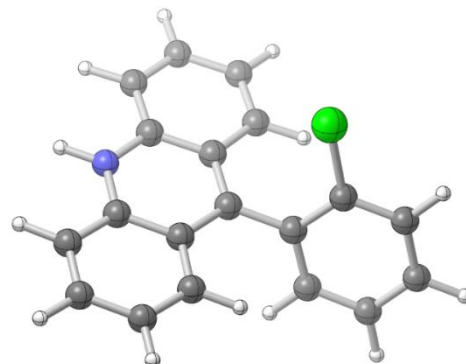

|       | E, kcal/mol | CV, cal/(mol·K) | S, cal/(mol·K) |
|-------|-------------|-----------------|----------------|
| Total | 175.918     | 64.763          | 129.066        |

C,0,-8.0271837927,-1.3302826638,-0.750385807  
C,0,-6.8573195506,-1.7900396631,-0.1497602337  
C,0,-5.7912808257,-0.9135172136,0.0825812919  
C,0,-5.8826129272,0.4656393487,-0.2807814758  
C,0,-7.0831613527,0.8902499606,-0.9011827729  
C,0,-8.1353534104,0.0128508455,-1.1295997402  
C,0,-4.7689176357,1.3284061881,-0.0284346976  
C,0,-3.585138379,0.8050613387,0.5831725201  
C,0,-3.5325756397,-0.5800935745,0.9265068951  
C,0,-2.3934124741,-1.1293321068,1.5268637537  
H,0,-2.3887807104,-2.1944231365,1.7728489557  
C,0,-1.2902579478,-0.3257192448,1.8046953164  
C,0,-1.3222433312,1.0378412114,1.4882439001  
C,0,-2.448041417,1.5898969293,0.8916961381  
H,0,-8.8526500418,-2.0233852779,-0.9272888099  
H,0,-6.7528759426,-2.8371998492,0.1456291423  
H,0,-7.1730350187,1.9343417011,-1.2098143094  
H,0,-9.0468420441,0.3743890008,-1.6110373906  
H,0,-0.4061770543,-0.7638356038,2.2732702853  
H,0,-0.4616145376,1.6721996643,1.7122590934  
H,0,-2.4664255622,2.656361201,0.6537353374

[Go back to table of contents](#)

N,0,-4.6299044168,-1.3660433314,0.6626415423  
 C,0,-4.8619794665,2.7669698455,-0.3618599471  
 C,0,-4.1326516206,3.3590481956,-1.4079018671  
 C,0,-5.7095396514,3.6127184982,0.3741815916  
 C,0,-4.2234307858,4.7197419623,-1.7004712315  
 C,0,-5.8147447512,4.972358916,0.0952950363  
 H,0,-6.2922416226,3.1760014839,1.1899491154  
 C,0,-5.0670593803,5.528039806,-0.9429837799  
 H,0,-3.6387034739,5.1352282797,-2.5225910728  
 H,0,-6.4792085729,5.6002564798,0.6928298267  
 H,0,-5.1391747338,6.5937212602,-1.1712911391  
 Cl,0,-3.0875908475,2.3696268702,-2.401967816  
 H,0,-4.5785575823,-2.3490448874,0.9129566696

### ***t*BuOH**

E(RM06L) = -233.474454117

Zero-point correction= 0.135054 (Hartree/Particle)

Thermal correction to Energy= 0.141723

Thermal correction to Enthalpy= 0.142667

Thermal correction to Gibbs Free Energy= 0.106170

Sum of electronic and ZPE= -233.339400

Sum of electronic and thermal Energies= -233.332731

Sum of electronic and thermal Enthalpies= -233.331787

Sum of electronic and thermal Free Energies= -233.368284

|       | E, kcal/mol | CV, cal/(mol·K) | S, cal/(mol·K) |
|-------|-------------|-----------------|----------------|
| Total | 88.932      | 24.948          | 76.814         |

C,0,0.3628547434,1.6398067455,0.0308469202  
 C,0,0.9192479126,2.748646679,0.9137909615  
 H,0,2.0202014157,2.7302914058,0.9199283681  
 H,0,0.6015276085,3.7351318198,0.5464281624  
 H,0,0.5825300841,2.6487473574,1.9562289847  
 C,0,0.8373347102,0.2771038693,0.5170462875  
 H,0,0.4614140516,-0.5224757115,-0.1374684102  
 H,0,1.9370731647,0.2217998027,0.5186535562  
 H,0,0.4961454185,0.0674150187,1.5415426595  
 O,0,0.7932397806,1.8426868943,-1.3205083954

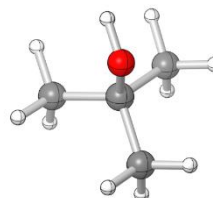

H,0,1.7589459577,1.8021501604,-1.31716399  
C,0,-1.1521902231,1.6979597258,-0.0200474456  
H,0,-1.5897033825,1.553558219,0.9773812356  
H,0,-1.4913471686,2.670498641,-0.4044979087  
H,0,-1.5493267934,0.9167664526,-0.6839375258

## Catalyst A1

E(RM06L) = -1245.44846717

Zero-point correction= 0.253739 (Hartree/Particle)

Thermal correction to Energy= 0.269076

Thermal correction to Enthalpy= 0.270020

Thermal correction to Gibbs Free Energy= 0.210130

Sum of electronic and ZPE= -1245.194728

Sum of electronic and thermal Energies= -1245.179391

Sum of electronic and thermal Enthalpies= -1245.178447

Sum of electronic and thermal Free Energies= -1245.238337

|       | E, kcal/mol | CV, cal/(mol·K) | S, cal/(mol·K) |
|-------|-------------|-----------------|----------------|
| Total | 168.848     | 62.633          | 126.05         |

C,0,-7.9557301532,-1.3464882494,-0.7783762211  
C,0,-6.8137700263,-1.7981990275,-0.1683907141  
C,0,-5.7244688855,-0.9149596827,0.0954880398  
C,0,-5.8535427183,0.4730882134,-0.2854784617  
C,0,-7.0540525582,0.8994692007,-0.9267389737  
C,0,-8.0757404721,0.0148540974,-1.1654681063  
C,0,-4.7749444938,1.3389772112,-0.0166247957  
C,0,-3.6203273781,0.8158399143,0.5990975161  
C,0,-3.6010264161,-0.5901317817,0.9291762808  
C,0,-2.4346842702,-1.1284548252,1.5507776811  
H,0,-2.4397119087,-2.1937597142,1.792014206  
C,0,-1.3539691987,-0.3320526923,1.8298459856  
C,0,-1.3759988567,1.0514277314,1.50847163  
C,0,-2.478355459,1.6099493916,0.9120775136  
H,0,-8.7804171352,-2.0358626639,-0.9746473685  
H,0,-6.6984006638,-2.8422034941,0.1313095802  
H,0,-7.1502474229,1.9442128696,-1.2322253197

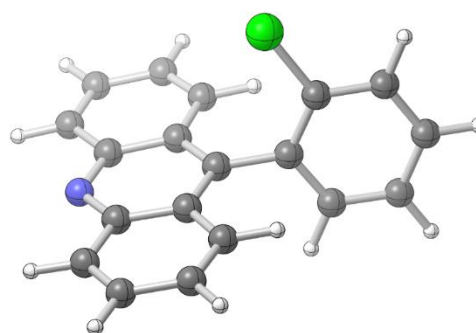

H,0,-8.9881617814,0.3559580099,-1.6596636652  
 H,0,-0.4676827772,-0.7593191357,2.3050419592  
 H,0,-0.5080015274,1.6722556803,1.7413278749  
 H,0,-2.4906284275,2.6759906694,0.670787924  
 N,0,-4.6288537815,-1.4133032502,0.682758876  
 C,0,-4.867390327,2.7819649485,-0.3530962865  
 C,0,-4.2130302087,3.3399181939,-1.4615567087  
 C,0,-5.6324344731,3.6434550804,0.4466915843  
 C,0,-4.3055328704,4.6979149273,-1.7639517177  
 C,0,-5.7324054325,5.0022045439,0.1596900168  
 H,0,-6.1532192418,3.2255562887,1.312220585  
 C,0,-5.0671960429,5.5291679518,-0.9466711254  
 H,0,-3.7842833691,5.0935600735,-2.6367810865  
 H,0,-6.3321870972,5.6500442591,0.8021491154  
 H,0,-5.1396556628,6.5932002497,-1.1819381085  
 Cl,0,-3.2633032975,2.3133392319,-2.5095333205

## Related Structures

### DTBP

E(RM06L) = -465.664913470

Zero-point correction= 0.249541 (Hartree/Particle)

Thermal correction to Energy= 0.262665

Thermal correction to Enthalpy= 0.263609

Thermal correction to Gibbs Free Energy= 0.211763

Sum of electronic and ZPE= -465.415373

Sum of electronic and thermal Energies= -465.402249

Sum of electronic and thermal Enthalpies= -465.401305

Sum of electronic and thermal Free Energies= -465.453151

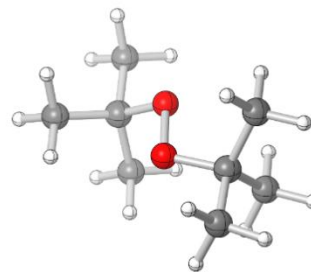

|       | E, kcal/mol | CV, cal/(mol·K) | S, cal/(mol·K) |
|-------|-------------|-----------------|----------------|
| Total | 164.825     | 50.166          | 109.119        |

C,0,0.355023671,1.6210093094,0.0536265903

C,0,0.9098911784,2.7693746421,0.8811512047

H,0,2.0075205681,2.7548171838,0.8947172767

H,0,0.585948072,3.7369007398,0.4720622299

H,0,0.5591762952,2.7041717907,1.9209507578  
C,0,0.8390935374,0.2783991182,0.574569881  
H,0,0.4268516706,-0.5500758509,-0.0188614087  
H,0,1.9347936648,0.2151415571,0.5432032138  
H,0,0.5237908044,0.1347605004,1.617982464  
O,0,0.7109054779,1.7941730139,-1.33143693  
O,0,2.171765664,1.8005363278,-1.4251769795  
C,0,2.5410264848,1.1579404708,-2.660378831  
C,0,2.1015866855,-0.2965242156,-2.6680516069  
H,0,1.0081254013,-0.3784007031,-2.6110884347  
H,0,2.4279254114,-0.7915413663,-3.5939199659  
H,0,2.5353931254,-0.8471581399,-1.8212236187  
C,0,1.9554811502,1.9198863382,-3.8385198101  
H,0,2.2475748311,2.9789989176,-3.8019272619  
H,0,2.3127911239,1.5000400426,-4.7895539674  
H,0,0.8588995775,1.8680621726,-3.8385765013  
C,0,4.0552414465,1.2738312742,-2.6299297706  
H,0,4.4743932928,0.7549411323,-1.7564821659  
H,0,4.4870522481,0.822288408,-3.5333518095  
H,0,4.3711384336,2.3254411058,-2.5897127708  
C,0,-1.1619036909,1.6720261204,-0.0069167806  
H,0,-1.5843923715,1.5588963646,1.0006598019  
H,0,-1.5095761418,2.6302254721,-0.4171171094  
H,0,-1.5605029017,0.8636073134,-0.6357328571

### PhNHCH<sub>3</sub>

E(RM06L) = -326.645312608

Zero-point correction= 0.144909 (Hartree/Particle)

Thermal correction to Energy= 0.152251

Thermal correction to Enthalpy= 0.153195

Thermal correction to Gibbs Free Energy= 0.113507

Sum of electronic and ZPE= -326.500404

Sum of electronic and thermal Energies= -326.493062

Sum of electronic and thermal Enthalpies= -326.492118

Sum of electronic and thermal Free Energies= -326.531806

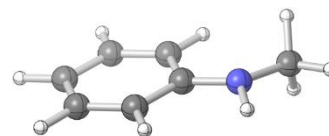

E, kcal/mol      CV, cal/(mol·K)      S, cal/(mol·K)

[Go back to table of contents](#)

Total            95.539                    28.181                    83.53

C,0,-0.688566426,1.1982599254,-0.092675824  
 C,0,0.7226440872,1.2533092348,-0.0328535354  
 C,0,1.3329879597,2.5232511616,0.054055427  
 C,0,0.5545224289,3.6791055575,0.0923954201  
 C,0,-0.8380448557,3.6161007056,0.0381468195  
 C,0,-1.4481022633,2.360403724,-0.0568376646  
 H,0,-1.1755123941,0.2214949641,-0.1673580091  
 H,0,2.4215005416,2.603027636,0.092797172  
 H,0,1.0538789574,4.6497457461,0.1619073091  
 H,0,-1.4395266325,4.5272209029,0.0660800166  
 H,0,-2.5380883692,2.2846437889,-0.1053661525  
 N,0,1.4574271277,0.0967443268,-0.0398882269  
 H,0,0.9617714935,-0.7457571163,-0.3032401428  
 C,0,2.8850305998,0.0799443642,-0.1732718826  
 H,0,3.3804101694,0.5727739213,0.678682702  
 H,0,3.2336573881,-0.9584582095,-0.1940906023  
 H,0,3.2459806276,0.5753355667,-1.093975066

***t*BuO<sup>•</sup>**

E(RM06L) = -232.922493087

Zero-point correction= 0.119673 (Hartree/Particle)

Thermal correction to Energy= 0.126043

Thermal correction to Enthalpy= 0.126988

Thermal correction to Gibbs Free Energy= 0.091043

Sum of electronic and ZPE= -232.802820

Sum of electronic and thermal Energies= -232.796450

Sum of electronic and thermal Enthalpies= -232.795506

Sum of electronic and thermal Free Energies= -232.831450

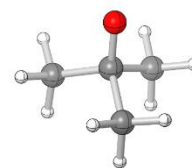

|       | E, kcal/mol | CV, cal/(mol·K) | S, cal/(mol·K) |
|-------|-------------|-----------------|----------------|
| Total | 79.093      | 23.908          | 75.651         |

C,0,0.399068477,1.6563814024,-0.0755474781  
 C,0,0.9149898635,2.7475134459,0.9151920021  
 H,0,2.0188782424,2.734737357,0.9272074578

[Go back to table of contents](#)



H,0,0.615279596,3.7439718819,0.5464321547  
H,0,0.5645243034,2.6540828104,1.9622495615  
C,0,0.8333069064,0.2792476068,0.5187778472  
H,0,0.4642305416,-0.5311058658,-0.1338054501  
H,0,1.9351284547,0.212055053,0.513060514  
H,0,0.4861906783,0.0678729733,1.5496545384  
O,0,0.8514826832,1.8397902062,-1.305732973  
C,0,-1.1602812012,1.6945443558,-0.0035594415  
H,0,-1.6014912485,1.5440820692,1.0016375018  
H,0,-1.5194550234,2.6653682021,-0.3873030144  
H,0,-1.5728509534,0.9193954318,-0.6728757705

### PhCH<sub>3</sub>NH<sub>2</sub><sup>+</sup>-*t*BuO radical complex

E(UM06L) = -559.904783054

Zero-point correction= 0.283767 (Hartree/Particle)

Thermal correction to Energy= 0.298557

Thermal correction to Enthalpy= 0.299501

Thermal correction to Gibbs Free Energy= 0.241459

Sum of electronic and ZPE= -559.621016

Sum of electronic and thermal Energies= -559.606226

Sum of electronic and thermal Enthalpies= -559.605282

Sum of electronic and thermal Free Energies= -559.663324

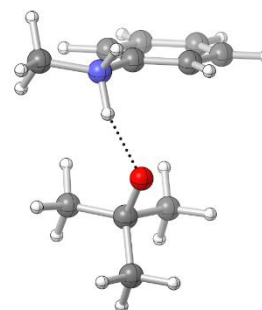

|       | E, kcal/mol | CV, cal/(mol·K) | S, cal/(mol·K) |
|-------|-------------|-----------------|----------------|
| Total | 187.347     | 56.293          | 122.16         |

C,0,3.3007305709,3.9658008285,-5.7341745014  
C,0,2.7940349648,4.5861010782,-4.5923908992  
C,0,2.585896448,5.9594493231,-4.5400888189  
C,0,2.9018618116,6.7269175417,-5.6628807419  
C,0,3.4122931737,6.1245250661,-6.8112646914  
C,0,3.6128832347,4.7438420542,-6.84531282  
H,0,3.4456409307,2.8825026927,-5.7498710471  
H,0,2.1878053902,6.439113975,-3.6453090444  
H,0,2.7457452535,7.8069934682,-5.6319271245  
H,0,3.6575900472,6.7333596547,-7.6838337883  
H,0,4.0132457987,4.266063006,-7.7416118707  
N,0,2.4223169937,3.712986358,-3.4728559938

[Go back to table of contents](#)

H,0,3.178994424,3.0349573707,-3.3205693589  
 C,0,2.072090933,4.3415316592,-2.1857628571  
 H,0,1.1753591237,4.9548178892,-2.3087038936  
 H,0,1.8706512552,3.5447663989,-1.4646222777  
 H,0,2.9065541634,4.9567395153,-1.836299515  
 H,0,1.6132457684,3.138120374,-3.8322962105  
 O,0,0.5188221375,2.4262489182,-4.9958935044  
 C,0,-0.6406660191,3.0770035226,-5.340034594  
 C,0,-0.2618907829,3.7688262041,-6.6833904048  
 H,0,0.0818560101,3.0352141458,-7.4225172841  
 H,0,-1.171179391,4.2612304162,-7.0558293838  
 H,0,0.5184482547,4.5240746703,-6.5255679858  
 C,0,-1.7491948547,2.0571906154,-5.5958099445  
 H,0,-1.992653957,1.5220389486,-4.6678009998  
 H,0,-2.657930712,2.5621815521,-5.9494981813  
 H,0,-1.4394361197,1.3212444753,-6.3487462157  
 C,0,-1.0367864146,4.1291703106,-4.3128074706  
 H,0,-0.2479597345,4.8885402423,-4.2020196675  
 H,0,-1.9586114849,4.6462665639,-4.6115273576  
 H,0,-1.2147702172,3.6631191608,-3.3327025516

### PhCH<sub>3</sub>NH<sub>2</sub><sup>+</sup>-DTBP radical complex

E(UM06L) = -792.815715987

Zero-point correction= 0.405895 (Hartree/Particle)

Thermal correction to Energy= 0.428341

Thermal correction to Enthalpy= 0.429286

Thermal correction to Gibbs Free Energy= 0.354227

Sum of electronic and ZPE= -792.409821

Sum of electronic and thermal Energies= -792.387375

Sum of electronic and thermal Enthalpies= -792.386430

Sum of electronic and thermal Free Energies= -792.461489

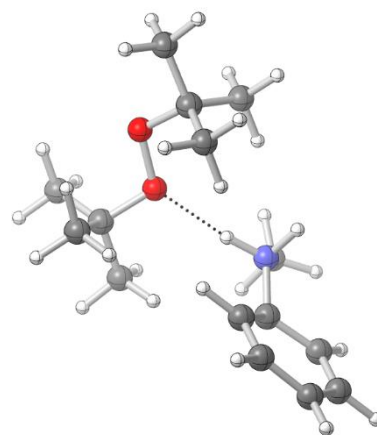

|       | E, kcal/mol | CV, cal/(mol·K) | S, cal/(mol·K) |
|-------|-------------|-----------------|----------------|
| Total | 268.788     | 85.454          | 157.973        |

C,0,2.864431818,4.7162174035,-5.9440418881

C,0,2.7245730407,5.1227909663,-4.5674068446

C,0,3.6800958348,6.0828616922,-4.0694571042

[Go back to table of contents](#)

C,0,4.5585771376,6.7061099163,-4.9332861131  
C,0,4.6115185891,6.3820456549,-6.3141467556  
C,0,3.7508464947,5.3560601247,-6.7857703303  
H,0,2.197991245,3.9374962627,-6.3370111044  
H,0,3.6587852132,6.3822384054,-3.0157969539  
H,0,5.2223684053,7.4834686034,-4.5380506236  
H,0,5.3185291079,6.877673243,-6.9830212921  
H,0,3.7754023568,5.0724939299,-7.8438343659  
N,0,2.3366042767,4.0172074681,-3.6365127445  
H,0,3.1345393625,3.3864751548,-3.4309116991  
C,0,1.7454019999,4.4364431305,-2.3530258297  
H,0,0.9356463641,5.1452485353,-2.55770263  
H,0,1.3583139352,3.5583395644,-1.8239647292  
H,0,2.5083743195,4.9219137362,-1.737152183  
H,0,1.6539239626,3.408798144,-4.1206994317  
C,0,1.3400267916,0.1653644875,-4.5357966115  
C,0,1.8935343987,0.369292239,-3.1353840175  
H,0,2.0653507758,1.4311430647,-2.9136281418  
H,0,1.1984179636,-0.0234663721,-2.3802239979  
H,0,2.8550146453,-0.1499461711,-3.0181572421  
C,0,2.2646996683,0.7260593244,-5.6014014117  
H,0,1.8382547873,0.5928288372,-6.6055315413  
H,0,2.4636446453,1.7964849659,-5.4564379887  
H,0,3.2336774663,0.2080419102,-5.575252292  
O,0,0.0199469524,0.7314200227,-4.6372061108  
O,0,0.0821999801,2.1837167377,-4.4402747101  
C,0,-0.9790136373,2.7662174616,-5.2424172543  
C,0,-0.6959111505,2.5563150139,-6.7184867763  
H,0,-0.6668548371,1.4869945493,-6.9655998216  
H,0,-1.482247137,3.0218773823,-7.3291036048  
H,0,0.2640470909,3.0076405083,-7.0082770219  
C,0,-2.3154835174,2.1681322458,-4.8373411127  
H,0,-2.4709795927,2.2574268087,-3.753035489  
H,0,-3.1349355772,2.6971664784,-5.3434290941  
H,0,-2.3817864695,1.1071265698,-5.1081124223  
C,0,-0.9113576824,4.2343154201,-4.86204678  
H,0,0.0676130503,4.6825311017,-5.0962918508  
H,0,-1.6686146611,4.7962226034,-5.4251574697  
H,0,-1.1154352154,4.3761058401,-3.7913820767  
C,0,1.0488163261,-1.3047000779,-4.7912106575

H,0,0.6260995249,-1.4558333955,-5.7939004739  
H,0,1.976577413,-1.8878346754,-4.7201059346  
H,0,0.3387893071,-1.7013457142,-4.0528467443

## Complex H

cu3-nha-def2-m06l.log

m06l/def2svp

E(RM06L) = -3846.72496152

Zero-point correction= 0.275852 (Hartree/Particle)

Thermal correction to Energy= 0.310955

Thermal correction to Enthalpy= 0.311899

Thermal correction to Gibbs Free Energy= 0.203950

Sum of electronic and ZPE= -3846.449109

Sum of electronic and thermal Energies= -3846.414006

Sum of electronic and thermal Enthalpies= -3846.413062

Sum of electronic and thermal Free Energies= -3846.521012

|       | E, kcal/mol | CV, cal/(mol·K) | S, cal/(mol·K) |
|-------|-------------|-----------------|----------------|
| Total | 195.127     | 125.149         | 227.199        |

C,0,1.7410393447,3.2221809597,0.0404249793  
C,0,0.6030161251,3.1569500047,0.8544041307  
C,0,-0.357805414,2.131602511,0.7388824396  
H,0,0.4353306858,3.9528860058,1.5766989658  
C,0,4.3836058342,-0.9471428108,-0.8264686721  
C,0,3.0855352741,-0.6907160595,1.2335765737  
C,0,4.1094851647,-1.3065412564,0.5127134381  
H,0,4.6991535993,-2.0859571645,0.9913028069  
Cu,0,1.5960067881,0.4389802486,-1.0509335152  
O,0,3.8581231618,-0.0396183037,-1.4860637896  
O,0,2.2491869727,0.1655066485,0.8484337028  
O,0,-0.3749284202,1.166859264,-0.0409814821  
O,0,2.1585639167,2.4175255771,-0.8208449959  
C,0,2.6357446505,4.4626260329,0.1683462529  
C,0,-1.585835871,2.2064389865,1.6610098176  
C,0,5.4171712153,-1.7781277193,-1.6012996354

C,0,2.8556518229,-1.1302814238,2.6818381147  
F,0,3.9033390236,4.1080199923,0.4231605533  
F,0,2.6429526824,5.1507312718,-0.9850566415  
F,0,2.2611470182,5.3141352106,1.133682277  
F,0,-2.7034463508,2.3678935417,0.931107691  
F,0,-1.7291180791,1.0635610355,2.3479634261  
F,0,-1.5526743921,3.2051075343,2.5560163186  
F,0,6.3509538508,-0.9906615762,-2.1501119376  
F,0,4.8055710159,-2.4268726139,-2.610464707  
F,0,6.0516679162,-2.6997549129,-0.8637793884  
F,0,1.7165315714,-1.8405973051,2.7686193217  
F,0,3.8370372445,-1.8929623578,3.1811216645  
F,0,2.7222065263,-0.0707220628,3.4880147884  
N,0,0.8383691713,0.6512176143,-2.7974273685  
C,0,0.9797415319,-0.1803613375,-3.8754486158  
C,0,2.2619220841,-0.649262862,-4.2582713609  
C,0,-0.1235823071,-0.561132273,-4.6785979356  
C,0,2.4235516357,-1.433891868,-5.3912797103  
H,0,3.1165277548,-0.3907314424,-3.6278294307  
C,0,0.0553124493,-1.3242229024,-5.8283057764  
H,0,-1.1245968795,-0.22702197,-4.3879532794  
C,0,1.3268551337,-1.7720900897,-6.1945431243  
H,0,3.4239127877,-1.7880189903,-5.6574500909  
H,0,-0.813467422,-1.5872468697,-6.4384101761  
H,0,1.4624425916,-2.3837761555,-7.0895091042  
C,0,0.997732405,-1.4129564559,-1.1949428899  
H,0,-0.0077055346,-1.4867115712,-1.623491032  
H,0,1.7500650591,-1.9123056716,-1.8217878311  
H,0,1.009990157,-1.7465280394,-0.1482244998  
H,0,-0.1568951707,0.8121802779,-2.6196758517

## Complex J

cu2nh2-anion-m06l.log  
m06l/def2svp  
E(UM06L) = -3806.88527572

Zero-point correction= 0.239366 (Hartree/Particle)

Thermal correction to Energy= 0.272266

Thermal correction to Enthalpy= 0.273211

[Go back to table of contents](#)

Thermal correction to Gibbs Free Energy= 0.167822  
 Sum of electronic and ZPE= -3806.645909  
 Sum of electronic and thermal Energies= -3806.613009  
 Sum of electronic and thermal Enthalpies= -3806.612065  
 Sum of electronic and thermal Free Energies= -3806.717453

|       | E, kcal/mol | CV, cal/(mol·K) | S, cal/(mol·K) |
|-------|-------------|-----------------|----------------|
| Total | 170.85      | 116.384         | 221.808        |

Cu,0,0.5543953718,0.900522425,-0.7045263914  
 C,0,-0.1449933661,3.6838566358,-0.1317947211  
 C,0,-1.4822050839,3.3904835703,0.1745138971  
 C,0,-1.9356853238,2.071290322,0.3050793652  
 H,0,-2.1784045458,4.2082754159,0.3448178347  
 O,0,0.7933840751,2.8919505773,-0.3680005189  
 O,0,-1.2968099813,1.005037661,0.1533617657  
 C,0,0.2781072976,5.1562115978,-0.1990815099  
 C,0,-3.3991075066,1.8385585484,0.6976320402  
 F,0,0.7160273785,5.4568868536,-1.4294533352  
 F,0,-0.7055531956,6.0147032591,0.0974656667  
 F,0,1.2863137952,5.3920496746,0.6508881946  
 F,0,-4.0202150066,1.1081090488,-0.2380084904  
 F,0,-4.1022483307,2.9658552814,0.8597212515  
 F,0,-3.4673011725,1.1533736083,1.8477468103  
 C,0,0.3898436846,0.6585936281,-3.7104475017  
 C,0,1.7228723128,0.2018266431,-3.7661693262  
 C,0,2.6262451168,0.3702622298,-2.7087330933  
 H,0,2.0620054559,-0.3117047957,-4.6634543965  
 O,0,-0.1940075295,1.2482418144,-2.7844904823  
 O,0,2.4518144428,0.9292069188,-1.6028417211  
 C,0,-0.5014928849,0.3900015281,-4.9329617099  
 C,0,4.0260075903,-0.2335771761,-2.8633513336  
 F,0,-1.0763185385,1.5254202099,-5.356223269  
 F,0,0.141053144,-0.1430783194,-5.9822552138  
 F,0,-1.4942205973,-0.454952821,-4.605570845  
 F,0,4.9738316616,0.6597842261,-2.5474002858  
 F,0,4.3007824769,-0.6846532246,-4.0955888261  
 F,0,4.167157056,-1.2724110237,-2.0203169148  
 N,0,0.4551366893,-1.0591180209,-0.8121167307

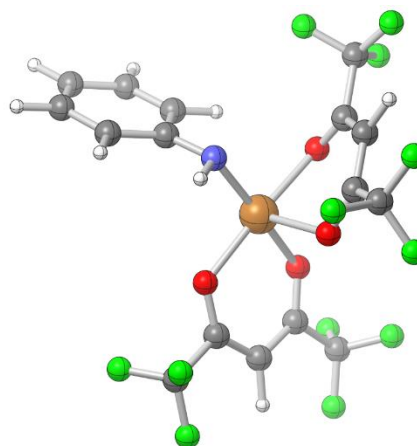

H,0,-0.5051510509,-1.3350641331,-1.0329338206  
 C,0,0.8524486071,-1.6963823631,0.3219616956  
 C,0,2.1043677681,-1.362899287,0.9156271881  
 C,0,0.0929529402,-2.7177921059,0.9584971527  
 C,0,2.5557055221,-2.011250114,2.0562493923  
 H,0,2.7049258618,-0.580220526,0.4409115088  
 C,0,0.5654147264,-3.3699780433,2.0907742035  
 H,0,-0.8791953324,-2.9865643302,0.5327904815  
 C,0,1.7981834029,-3.0257718067,2.6565525432  
 H,0,3.5203825929,-1.7266030333,2.4869723231  
 H,0,-0.0431261672,-4.1551873106,2.549669677  
 H,0,2.161379643,-3.5357592429,3.5518304454

## Complex I

cu1-nhme-def2-m06l.log  
 m06l/def2svp  
 E(RM06L) = -3846.79105061

Zero-point correction= 0.279029 (Hartree/Particle)  
 Thermal correction to Energy= 0.313709  
 Thermal correction to Enthalpy= 0.314653  
 Thermal correction to Gibbs Free Energy= 0.208943  
 Sum of electronic and ZPE= -3846.512021  
 Sum of electronic and thermal Energies= -3846.477341  
 Sum of electronic and thermal Enthalpies= -3846.476397  
 Sum of electronic and thermal Free Energies= -3846.582108

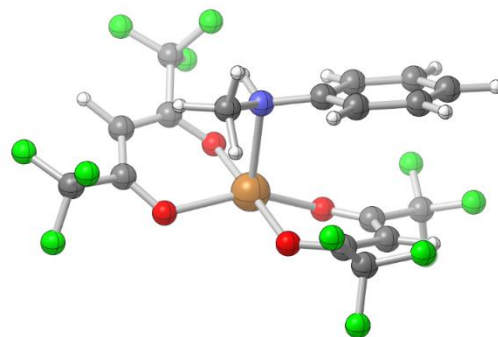

|       | E, kcal/mol | CV, cal/(mol·K) | S, cal/(mol·K) |
|-------|-------------|-----------------|----------------|
| Total | 196.856     | 123.608         | 222.486        |

Cu,0,0.2622779733,0.8018462365,0.302787145  
 C,0,-0.3407724705,3.675434463,0.4557446112  
 C,0,-1.7300976035,3.474915506,0.3838984111  
 C,0,-2.2806750754,2.1883994035,0.5218754181  
 H,0,-2.3738981816,4.3053227028,0.0980503419  
 O,0,0.549983456,2.8209880663,0.6881541636  
 O,0,-1.6954970089,1.1386500524,0.8894370862  
 C,0,0.2038146098,5.0645541163,0.1315512873  
 C,0,-3.7233478564,1.9685935304,0.0799096669

[Go back to table of contents](#)

F,0,1.0880659825,5.4631574836,1.059003208  
F,0,0.8604773969,5.0652486412,-1.0469355772  
F,0,-0.7402299205,6.0158643405,0.0536232688  
F,0,-3.7478444467,1.2475081499,-1.0683361755  
F,0,-4.4077618703,3.097042112,-0.1562462572  
F,0,-4.4186638752,1.2641846149,0.9828930394  
C,0,0.9059773514,-2.0514159132,0.5361438746  
C,0,2.104785637,-1.9419454166,-0.1862254371  
C,0,2.633560813,-0.6902383215,-0.5435191938  
H,0,2.5761821938,-2.8449126908,-0.5713692791  
O,0,0.1981794281,-1.1293731775,1.0038644458  
O,0,2.2296756661,0.4482733651,-0.2078934245  
C,0,0.3758796807,-3.4578233596,0.8295657058  
C,0,3.8868302305,-0.6743649495,-1.4233690348  
F,0,-0.959624649,-3.5054567888,0.7515341162  
F,0,0.8585983523,-4.4054794359,0.0093194985  
F,0,0.7049869972,-3.8267286486,2.084487854  
F,0,3.8409688136,0.3125278139,-2.3294038121  
F,0,4.0986178804,-1.8189453414,-2.0926634157  
F,0,4.9828329532,-0.4569902824,-0.6692863956  
N,0,-0.4074582225,0.950805449,-1.9818212609  
H,0,-1.3945355201,1.1490554455,-1.8350395097  
C,0,-0.2003659823,-0.3530006596,-2.4403554626  
C,0,0.8623563971,-0.6840213976,-3.2978493675  
C,0,-1.0478907222,-1.3793771949,-1.9807759987  
C,0,1.0781505194,-2.0130928876,-3.6661519735  
H,0,1.5302956639,0.0944820037,-3.6694322754  
C,0,-0.8257098437,-2.6963145741,-2.3622046319  
H,0,-1.8619844195,-1.1244100958,-1.2944908424  
C,0,0.2435343751,-3.0279359068,-3.2025656833  
H,0,1.9201990682,-2.2520851606,-4.3218192939  
H,0,-1.4885004903,-3.4802361009,-1.9868040297  
H,0,0.4204225783,-4.0675671822,-3.4878284051  
C,0,0.3046102664,2.047071377,-2.6001116796  
H,0,1.3709675182,2.0163245691,-2.3303729979  
H,0,0.2261490639,2.0513488715,-3.7020208077  
H,0,-0.1054637007,2.9921689761,-2.2288636905



## Anilium Cation

anilp-def2-m06l.log

m06l/def2svp

E(RM06L) = -287.815535884

Zero-point correction= 0.132141 (Hartree/Particle)

Thermal correction to Energy= 0.138019

Thermal correction to Enthalpy= 0.138963

Thermal correction to Gibbs Free Energy= 0.102707

Sum of electronic and ZPE= -287.683395

Sum of electronic and thermal Energies= -287.677517

Sum of electronic and thermal Enthalpies= -287.676573

Sum of electronic and thermal Free Energies= -287.712829

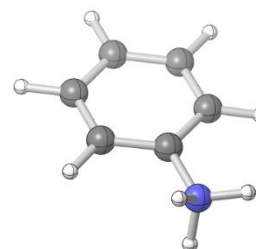

|       | E, kcal/mol | CV, cal/(mol·K) | S, cal/(mol·K) |
|-------|-------------|-----------------|----------------|
| Total | 86.608      | 22.901          | 76.307         |

C,0,-0.7700128297,1.1702450386,-0.0333344819

C,0,0.6169513503,1.2079957411,0.0646267464

C,0,1.3231639812,2.4036965079,0.1185534042

C,0,0.611610938,3.6019446655,0.0731477143

C,0,-0.7789300223,3.5880224022,-0.0256236217

C,0,-1.4674234047,2.375260449,-0.0781305517

H,0,-1.2952373555,0.2133888421,-0.0709093766

H,0,2.4127442121,2.3985415318,0.1958866238

H,0,1.152208418,4.5492056862,0.1168875316

H,0,-1.3317047463,4.5289579161,-0.0595288362

H,0,-2.5563863495,2.3632258946,-0.1528044744

N,0,1.3542073961,-0.0557126551,0.0958454988

H,0,1.3712952664,-0.5164193269,-0.8246565235

H,0,2.3327564843,0.0741554386,0.3782218189

H,0,0.9404364316,-0.7317479117,0.7503958102

## A1-H<sup>+</sup>

anthcl-cat-def2-m06l.log

m06l/def2svp

E(RM06L) = -1245.90593618

[Go back to table of contents](#)

Zero-point correction= 0.267654 (Hartree/Particle)  
 Thermal correction to Energy= 0.283122  
 Thermal correction to Enthalpy= 0.284066  
 Thermal correction to Gibbs Free Energy= 0.224107  
 Sum of electronic and ZPE= -1245.638282  
 Sum of electronic and thermal Energies= -1245.622814  
 Sum of electronic and thermal Enthalpies= -1245.621870  
 Sum of electronic and thermal Free Energies= -1245.681829

|       | E, kcal/mol | CV, cal/(mol·K) | S, cal/(mol·K) |
|-------|-------------|-----------------|----------------|
| Total | 177.662     | 63.46           | 126.194        |

C,0,-7.9802923439,-1.3252527026,-0.7686242483  
 C,0,-6.8406657534,-1.7976218523,-0.159449571  
 C,0,-5.7727131987,-0.9109997642,0.084796266  
 C,0,-5.8657175817,0.4706516375,-0.2833491874  
 C,0,-7.0606623347,0.9083635006,-0.9224930926  
 C,0,-8.0907032629,0.0316603201,-1.1572077711  
 C,0,-4.772460137,1.3261767554,-0.0184425502  
 C,0,-3.604668674,0.8118464966,0.5904338014  
 C,0,-3.5547207996,-0.5775771637,0.9339974245  
 C,0,-2.4100093583,-1.1316677995,1.5426103871  
 H,0,-2.4017255744,-2.1946791105,1.7907311108  
 C,0,-1.3314306772,-0.3200455284,1.8075669762  
 C,0,-1.3588485456,1.0583738393,1.4841348036  
 C,0,-2.466895429,1.6121417091,0.8928513814  
 H,0,-8.8087325326,-2.0097511343,-0.9609815466  
 H,0,-6.7429225614,-2.8436149987,0.1362112193  
 H,0,-7.1422454783,1.9519436765,-1.230151224  
 H,0,-9.0000118063,0.3776887388,-1.6510233829  
 H,0,-0.4427291183,-0.7448481219,2.2782682663  
 H,0,-0.4923840948,1.6812742805,1.7113955036  
 H,0,-2.4892434462,2.6760841009,0.6499732324  
 N,0,-4.6337523587,-1.3538065211,0.6695580893  
 C,0,-4.8672906645,2.7669588843,-0.352310829  
 C,0,-4.1754527121,3.3293556109,-1.4353756543  
 C,0,-5.6702062337,3.6120395581,0.4273495289  
 C,0,-4.2698804537,4.6873020979,-1.7327852477

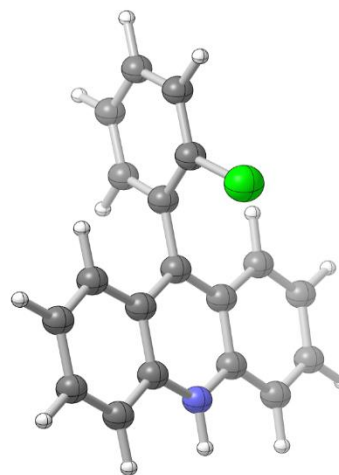

C,0,-5.7641104396,4.9714285131,0.1448879102  
 H,0,-6.2188997354,3.1847815273,1.2702761555  
 C,0,-5.0636781243,5.5073583508,-0.9349668167  
 H,0,-3.7258088787,5.0917673305,-2.587164937  
 H,0,-6.3890397106,5.6120863527,0.7696794582  
 H,0,-5.1353437372,6.5720286183,-1.1664143995  
 Cl,0,-3.1947717848,2.3081145436,-2.4557924089  
 H,0,-4.5826689626,-2.3415293118,0.9238156705

## TS1

ts2-def2-m06l-rel.log  
 m06l/def2svp  
 E(RM06L) = -3846.71444978

Zero-point correction= 0.275575 (Hartree/Particle)  
 Thermal correction to Energy= 0.310093  
 Thermal correction to Enthalpy= 0.311037  
 Thermal correction to Gibbs Free Energy= 0.205166  
 Sum of electronic and ZPE= -3846.438875  
 Sum of electronic and thermal Energies= -3846.404357  
 Sum of electronic and thermal Enthalpies= -3846.403413  
 Sum of electronic and thermal Free Energies= -3846.509284

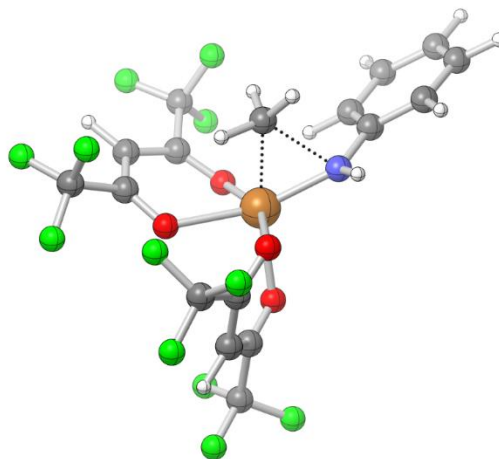

|       | E, kcal/mol | CV, cal/(mol·K) | S, cal/(mol·K) |
|-------|-------------|-----------------|----------------|
| Total | 194.586     | 123.394         | 222.825        |

C,0,1.900068023,3.534816346,-0.166704172  
 C,0,0.971703761,3.407210139,0.876772797  
 C,0,-0.045245671,2.433383259,0.844134766  
 H,0,1.085922229,4.027531317,1.763632414  
 C,0,3.705883699,-1.010108103,-1.264486407  
 C,0,2.703290848,-0.577285789,0.91528604  
 C,0,3.517752013,-1.362465233,0.085187441  
 H,0,3.940928439,-2.29062588,0.466263694  
 Cu,0,1.324996516,0.850908876,-1.325084284  
 O,0,3.302687142,0.018645858,-1.843461401  
 O,0,2.110836639,0.485580702,0.62559647  
 O,0,-0.388108627,1.709926397,-0.108130175

[Go back to table of contents](#)

O,0,2.016850948,2.847094145,-1.204630063  
C,0,2.956152766,4.639695972,-0.051728164  
C,0,-0.815885524,2.161449157,2.140543852  
C,0,4.379698941,-2.039356892,-2.179689915  
C,0,2.387036174,-1.1065922,2.31692994  
F,0,4.193906819,4.119275665,-0.059328954  
F,0,2.877335357,5.474132529,-1.102448627  
F,0,2.851750388,5.392128007,1.054512773  
F,0,-2.141977232,2.168207654,1.929371973  
F,0,-0.500803813,0.938435398,2.603661575  
F,0,-0.570950797,3.0345609,3.13022849  
F,0,5.143811798,-1.448422865,-3.104355386  
F,0,3.435156893,-2.739879934,-2.843809389  
F,0,5.144309863,-2.929314342,-1.531349098  
F,0,1.154369219,-1.650876793,2.332383069  
F,0,3.237684154,-2.052452396,2.744001944  
F,0,2.39331048,-0.124053503,3.224174914  
C,0,0.28953796,0.047396351,-4.086375726  
C,0,-0.831159544,-0.090436108,-4.934170759  
C,0,1.535720425,-0.433090415,-4.545229596  
C,0,-0.699371687,-0.652975942,-6.200989091  
H,0,-1.805280973,0.266370876,-4.585891632  
C,0,1.647895735,-1.018045888,-5.800214017  
H,0,2.405767938,-0.33648835,-3.890749713  
C,0,0.536853287,-1.128269726,-6.644082052  
H,0,-1.579634943,-0.734233582,-6.844805824  
H,0,2.623216267,-1.388477401,-6.129150291  
H,0,0.634164094,-1.581515284,-7.633264767  
C,0,0.256062228,-0.903689806,-1.531613646  
H,0,-0.771668378,-1.146008846,-1.813137991  
H,0,0.972867078,-1.585619814,-2.003749324  
H,0,0.326684828,-0.87037414,-0.431137346  
N,0,0.178702044,0.659726823,-2.857589224  
H,0,-0.784867104,0.925084533,-2.658491596

## NMR Spectroscopic data

### *N*-Cyclohexyl-4-methylaniline (3)

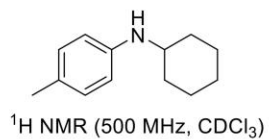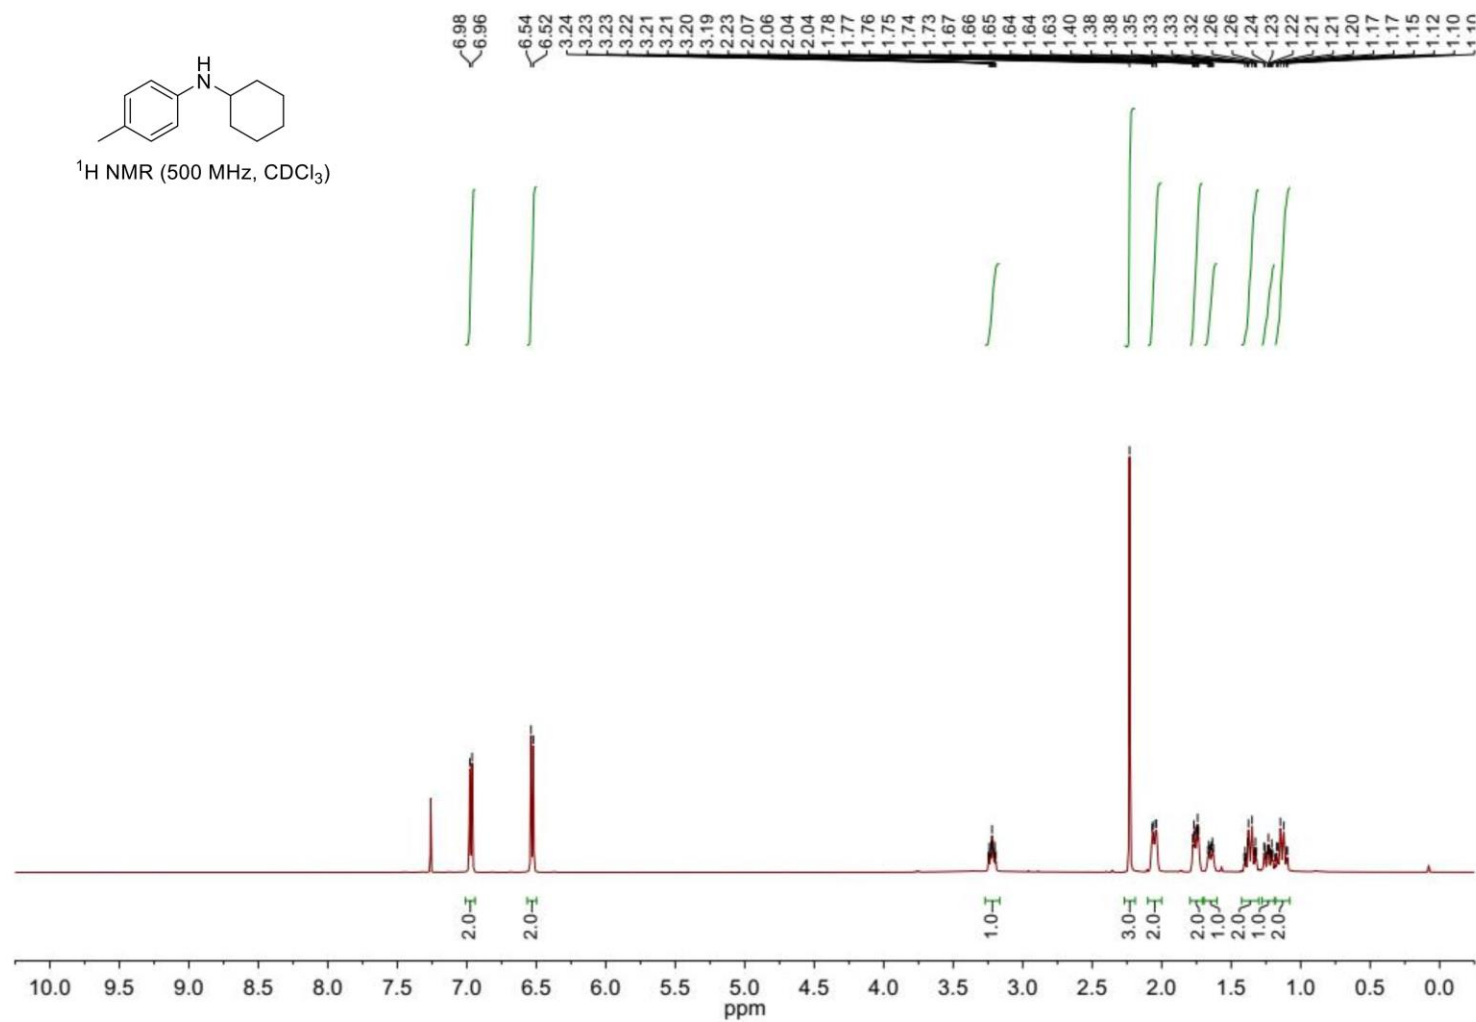

### N-Cyclohexyl-4-methylaniline (3)

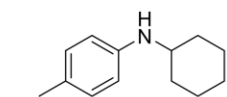

<sup>13</sup>C NMR (125 MHz, CDCl<sub>3</sub>)

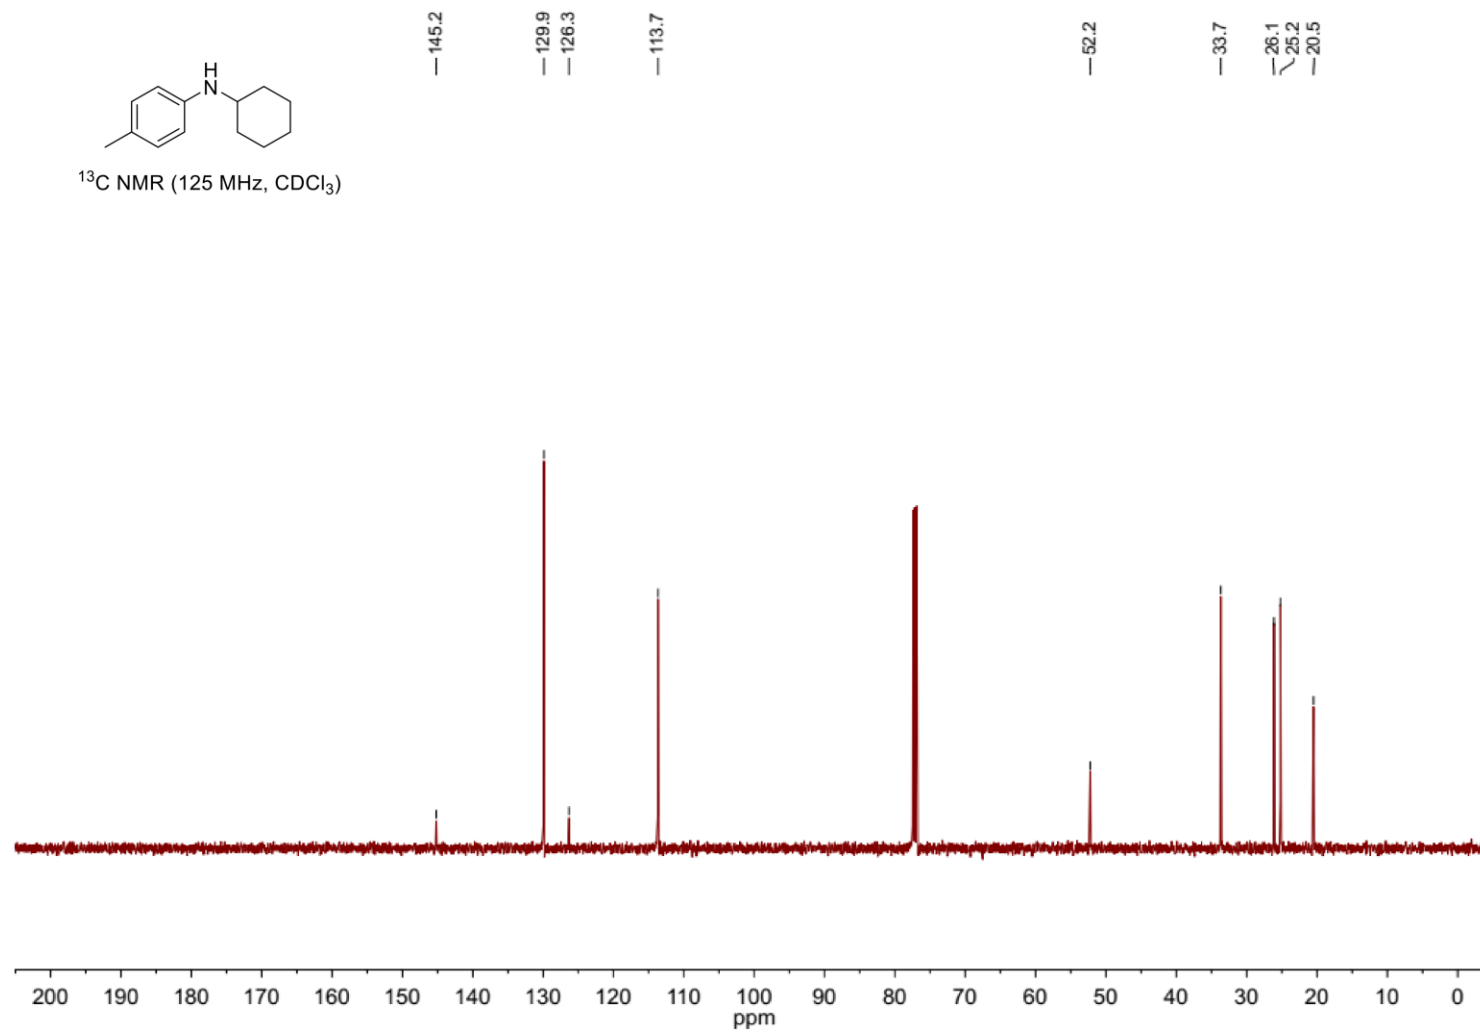

[Go back to table of contents](#)

### 3-Methoxy-N-(4-phenylbutyl)aniline (4)

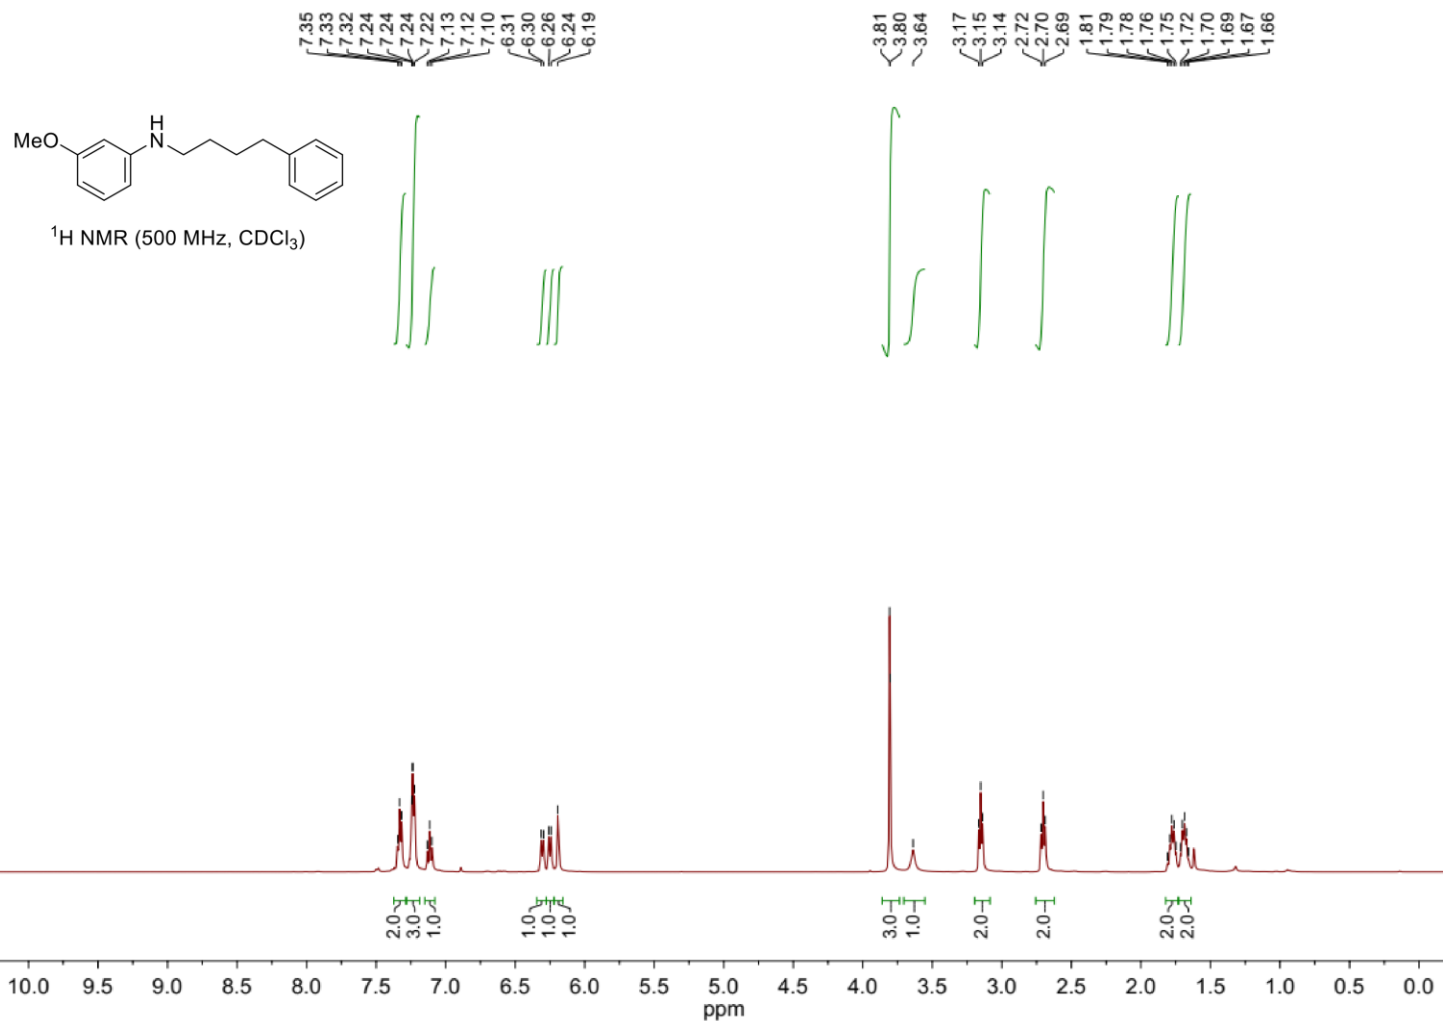

### 3-Methoxy-N-(4-phenylbutyl)aniline (4)

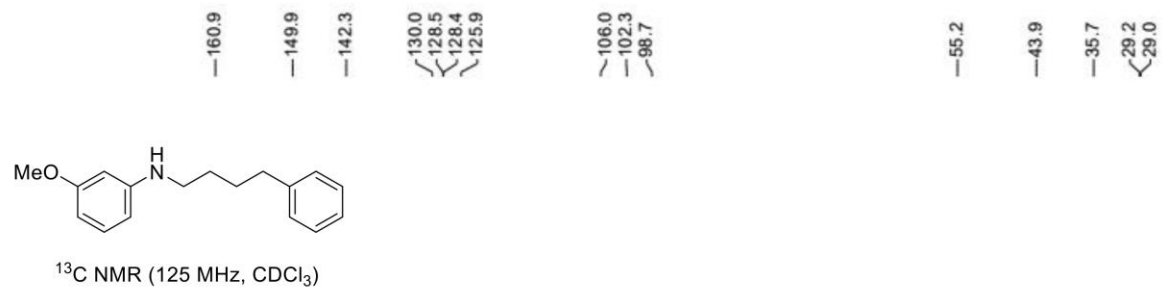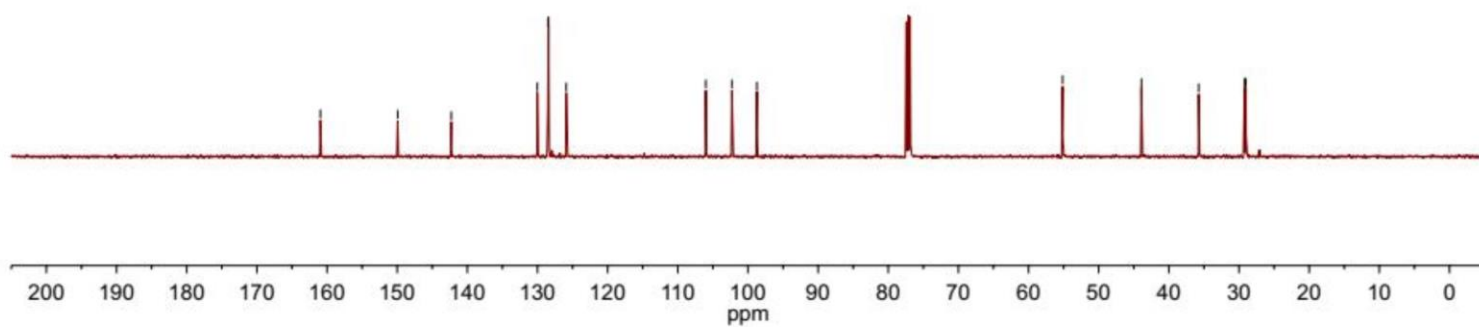



### 4-Methoxy-N-nonylaniline (5)

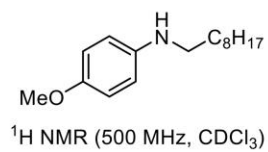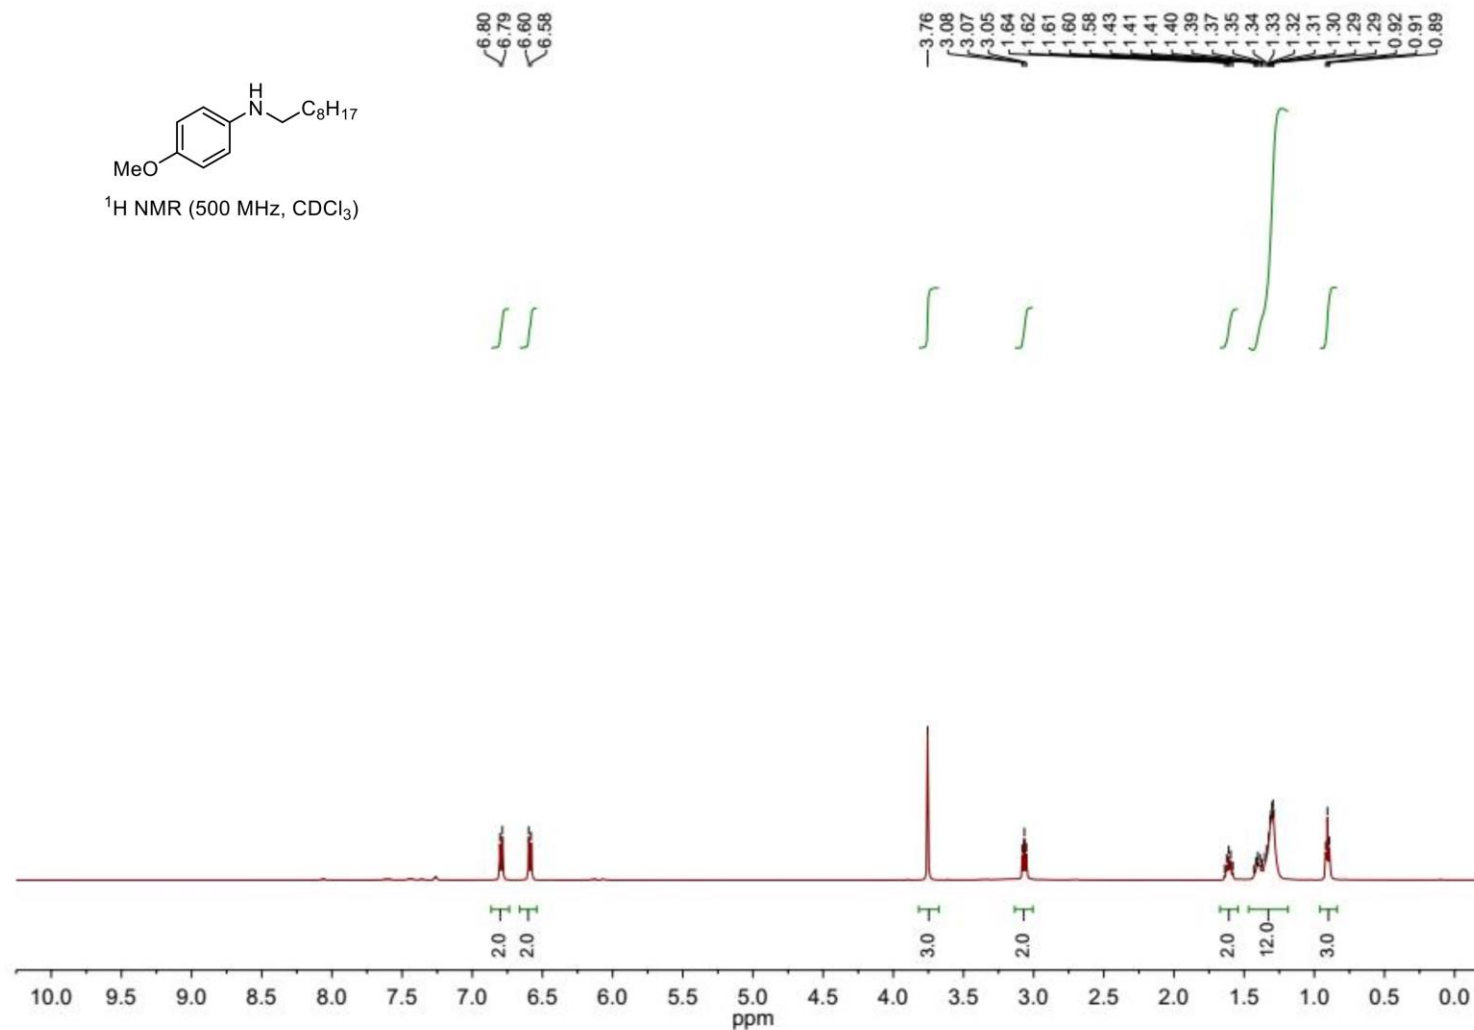

### 4-Methoxy-N-nonylaniline (5)

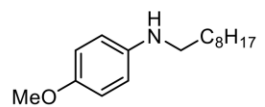

$^{13}\text{C}$  NMR (125 MHz,  $\text{CDCl}_3$ )

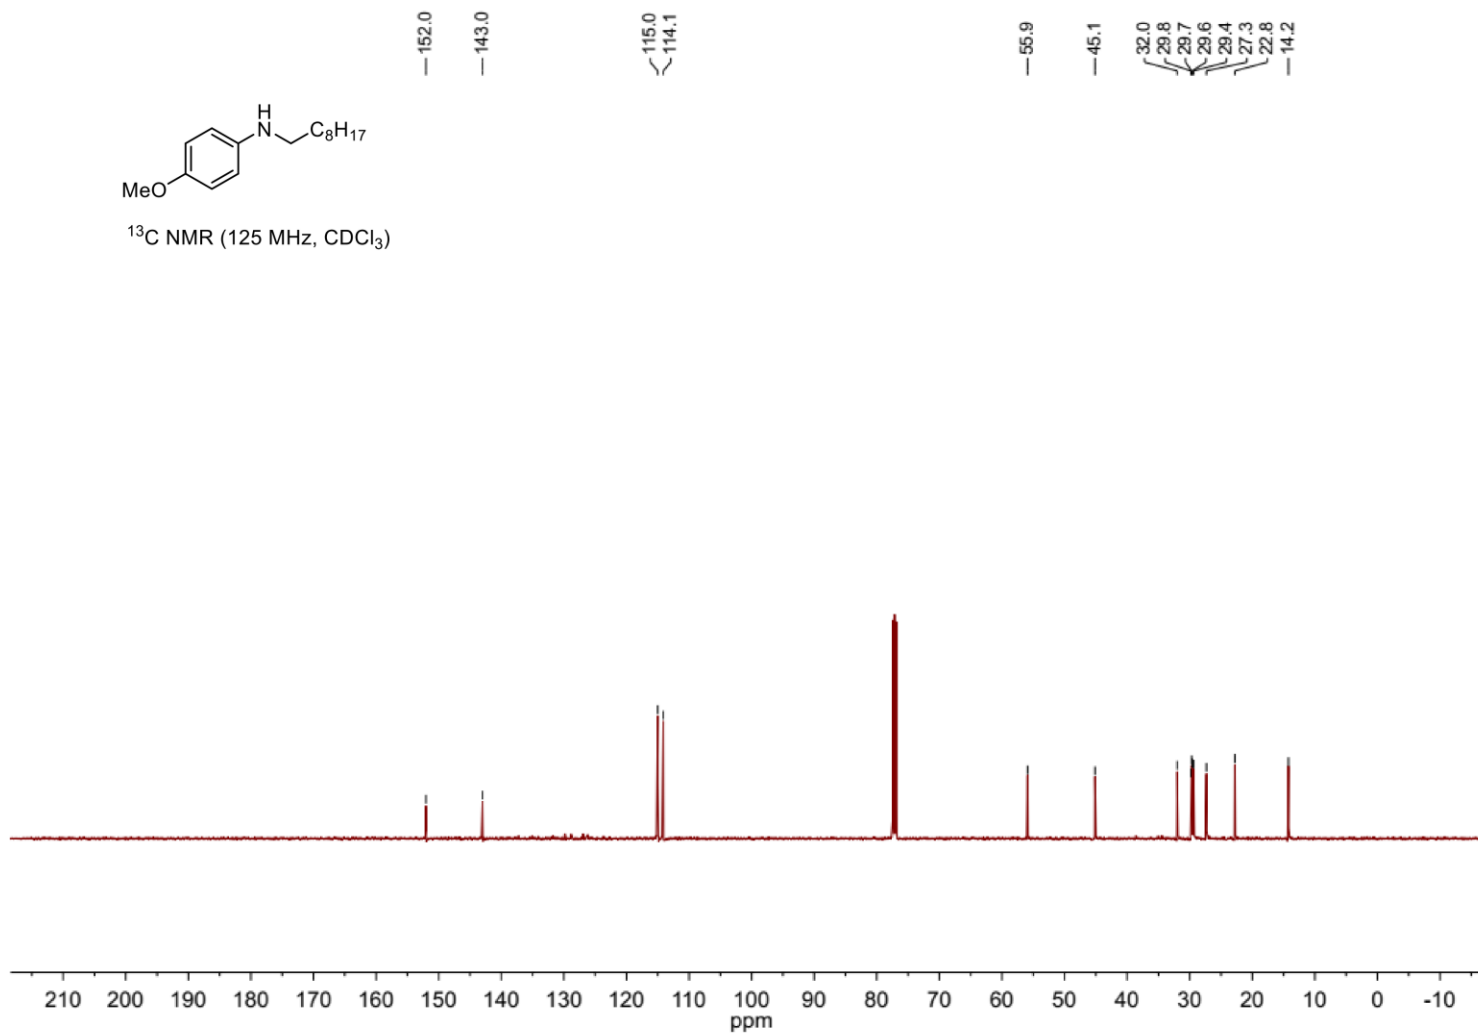

[Go back to table of contents](#)

### N-(5-Chloropentyl)-3-methoxyaniline (6)

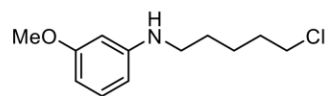

<sup>1</sup>H NMR (500 MHz, CDCl<sub>3</sub>)

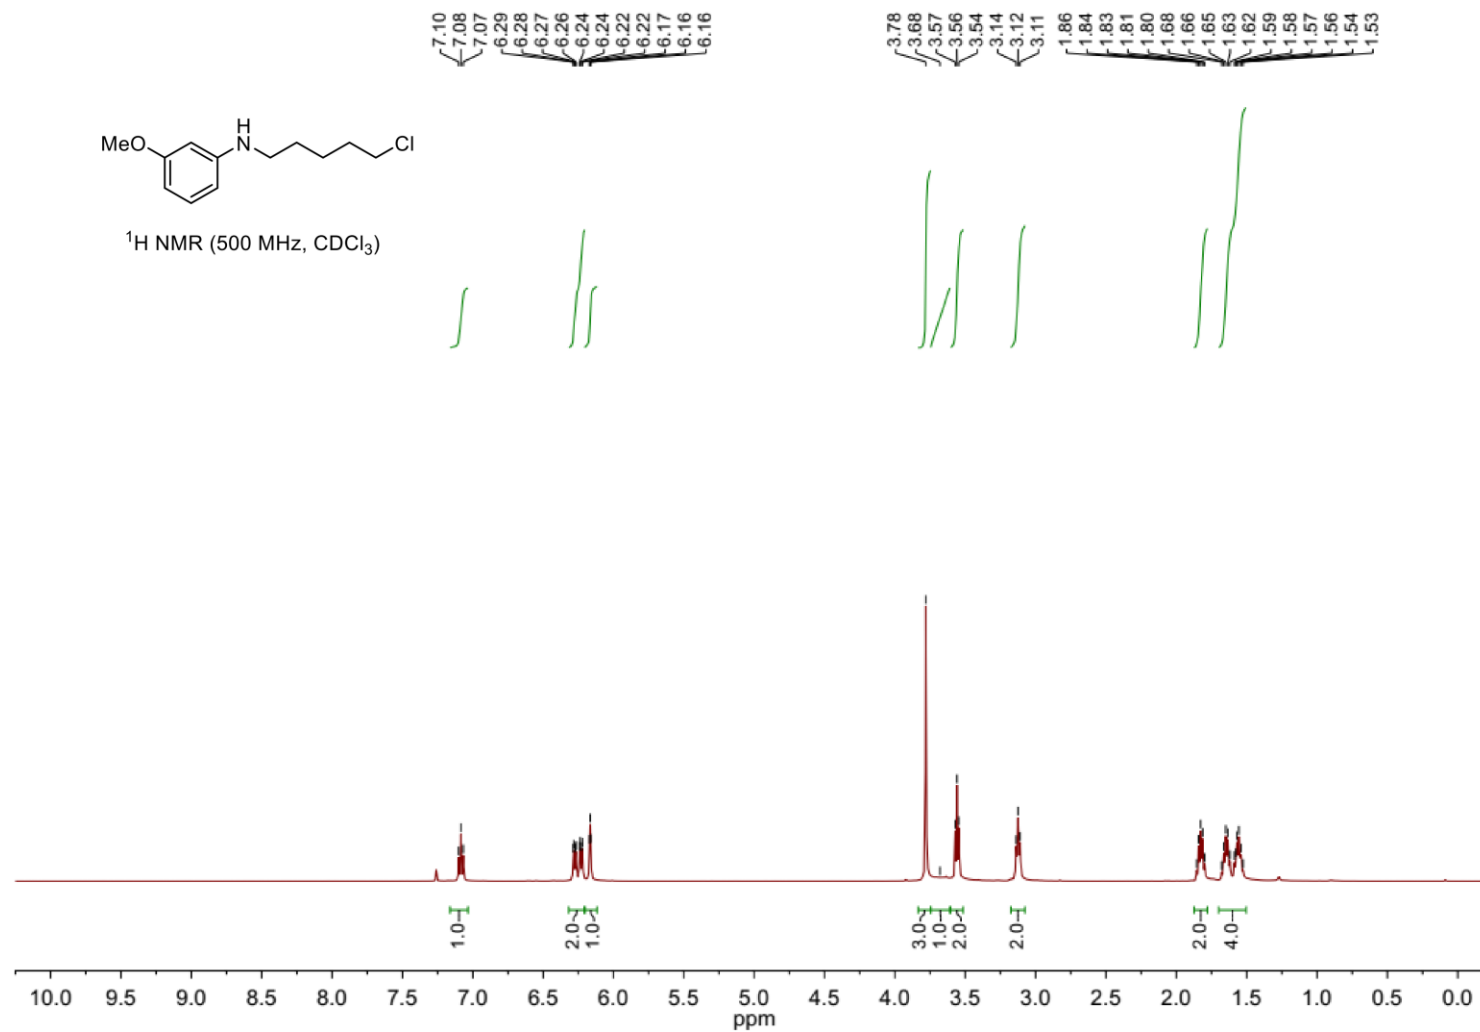

### *N*-(5-Chloropentyl)-3-methoxyaniline (6)

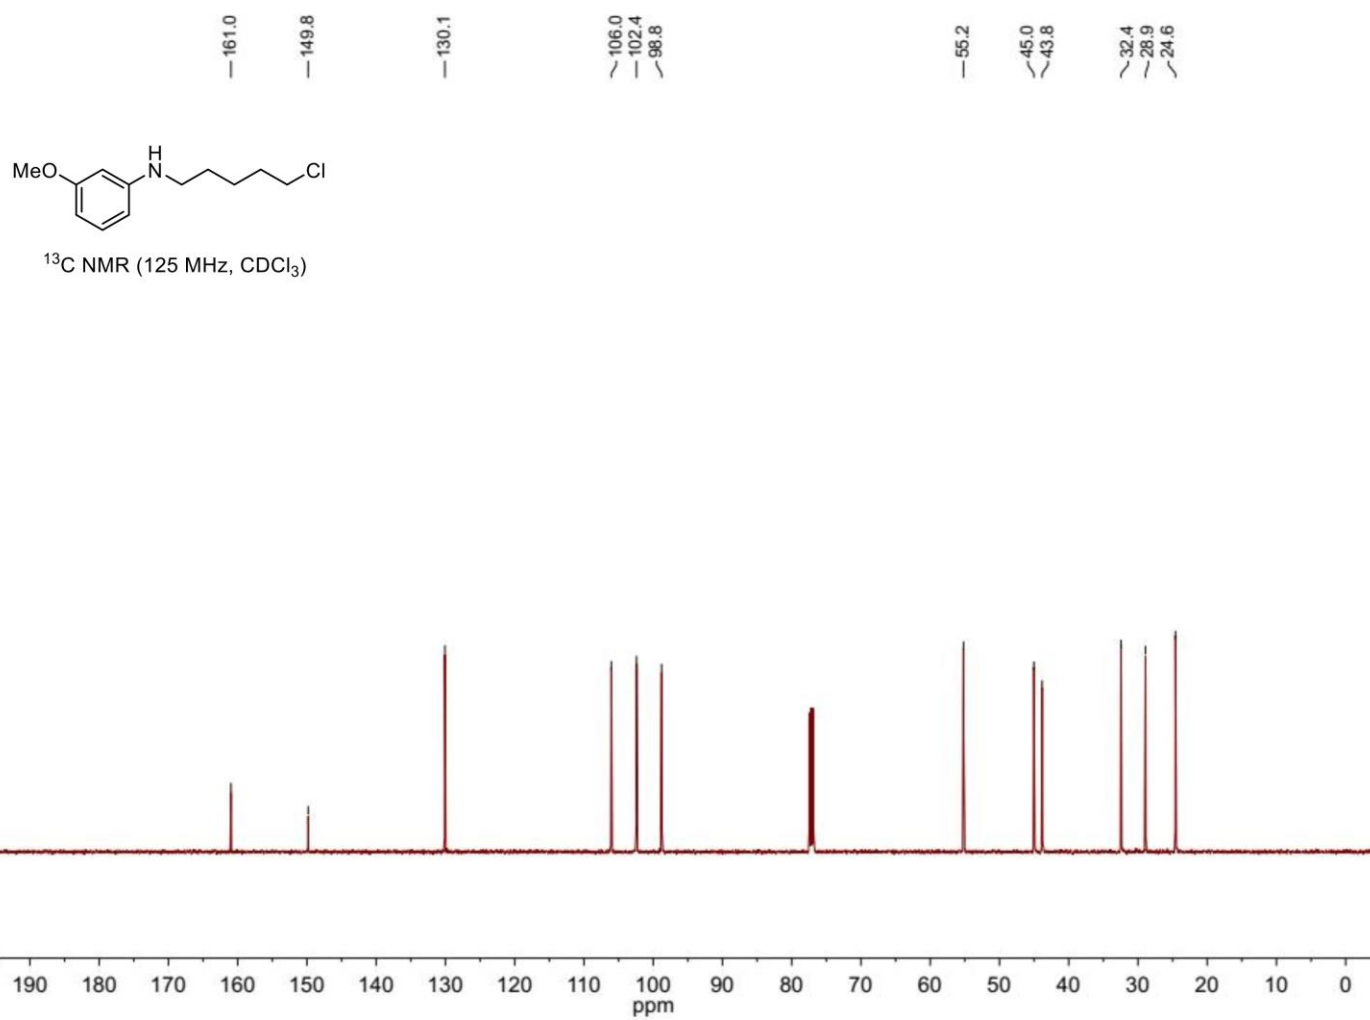

*tert*-Butyl 4-(pentylamino)benzoate (7)

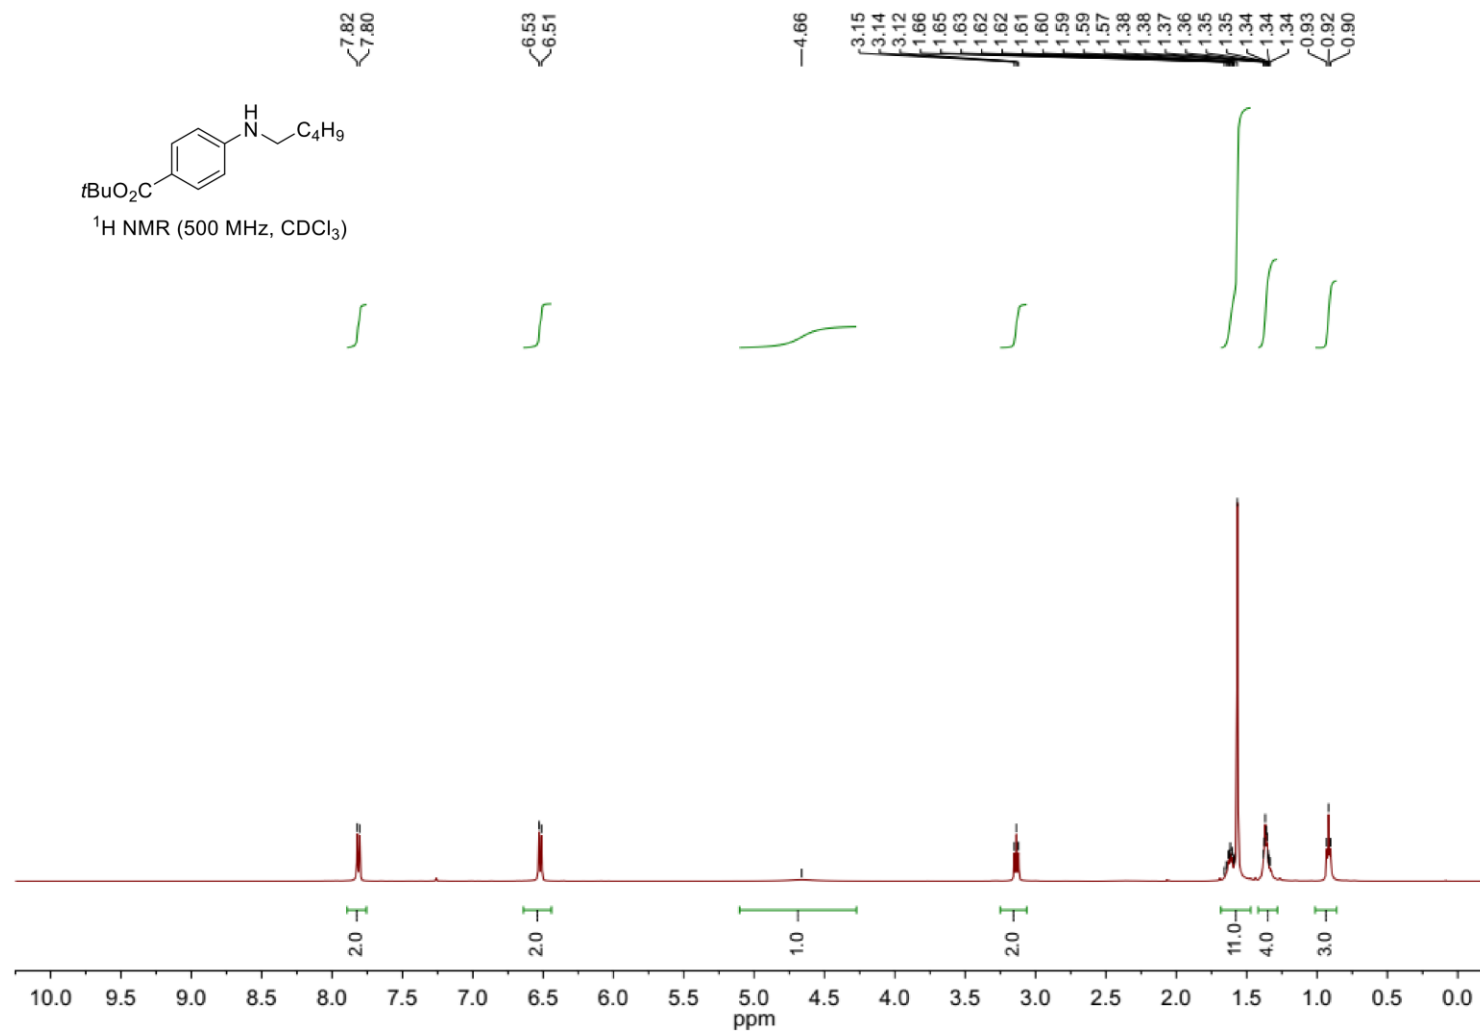

*tert*-Butyl 4-(pentylamino)benzoate (7)

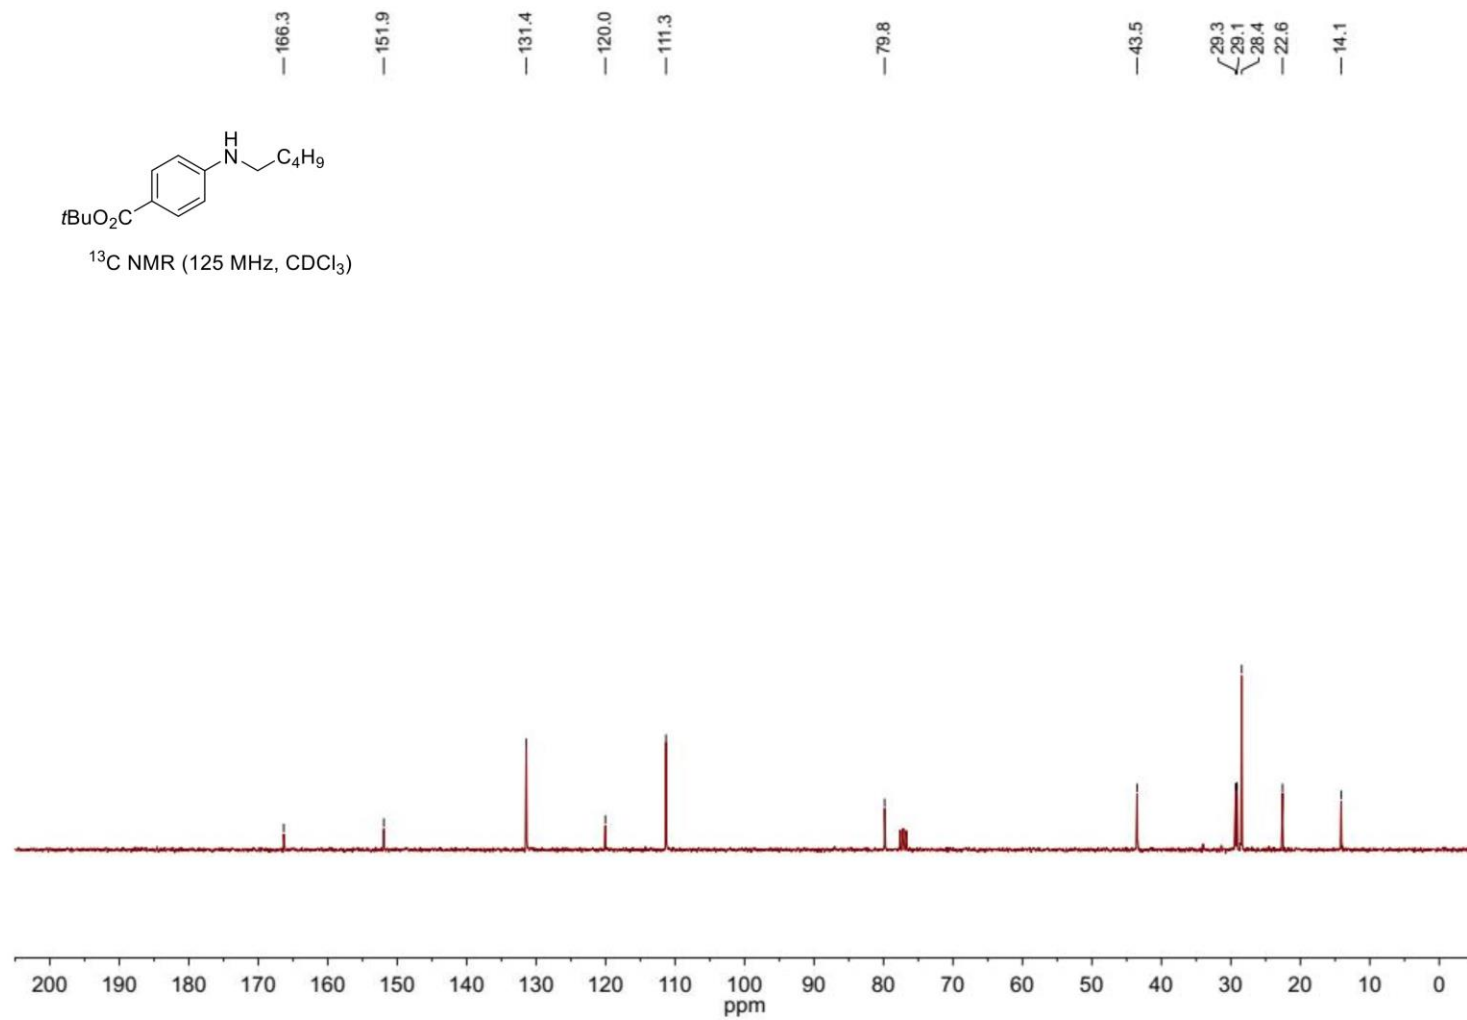

[Go back to table of contents](#)

*tert*-Butyl 4-(pentylamino)benzoate (8)

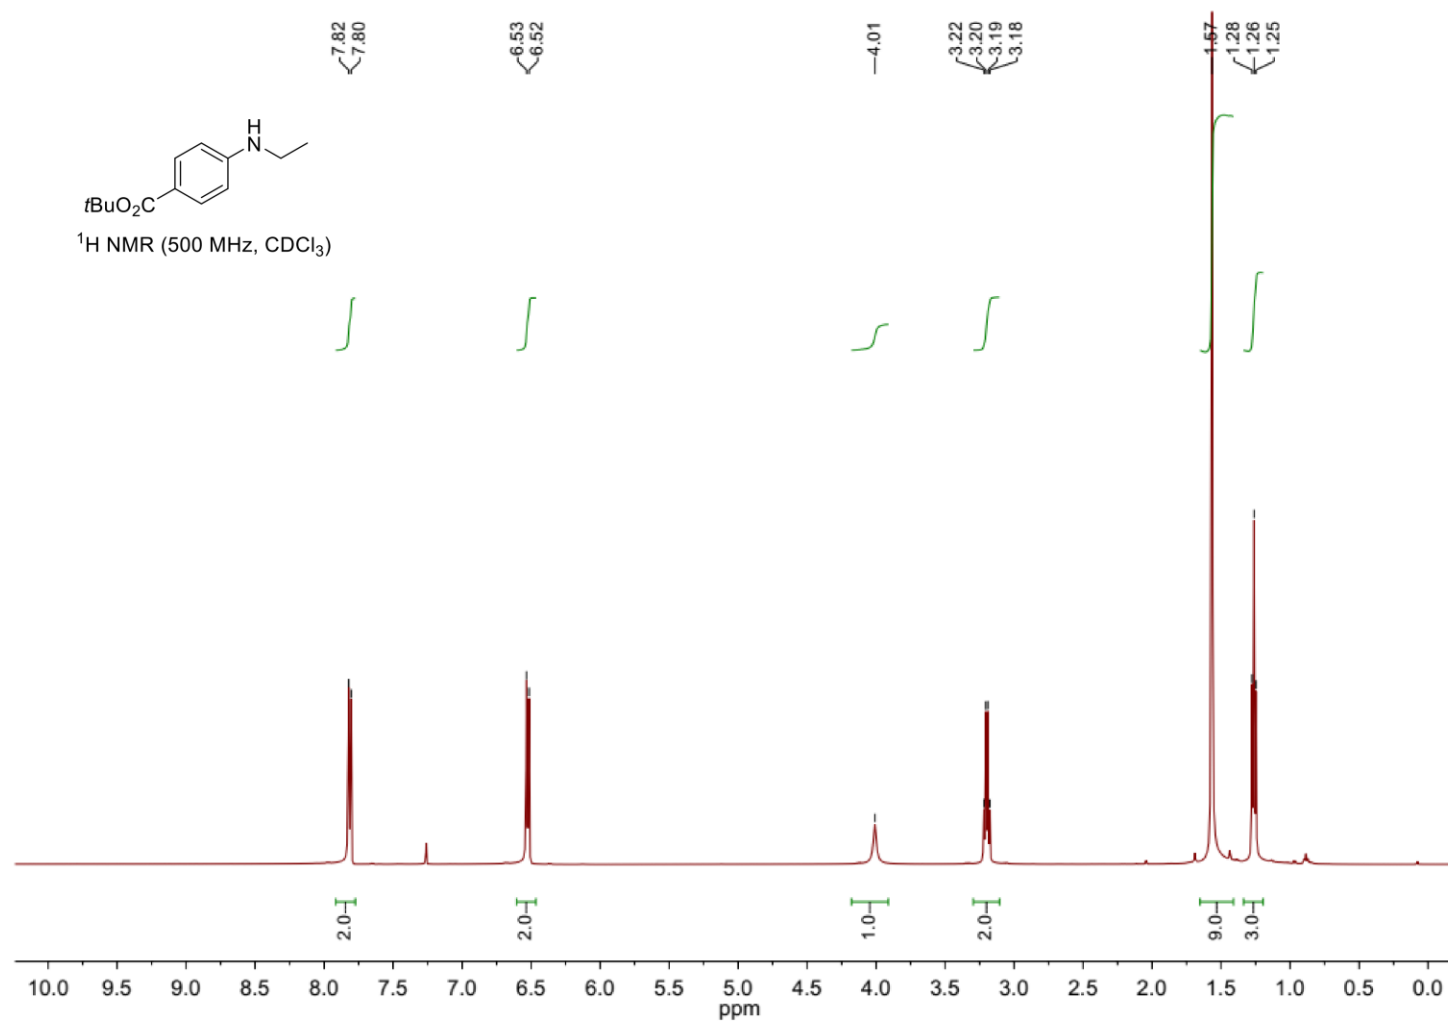

*tert*-Butyl 4-(pentylamino)benzoate (8)

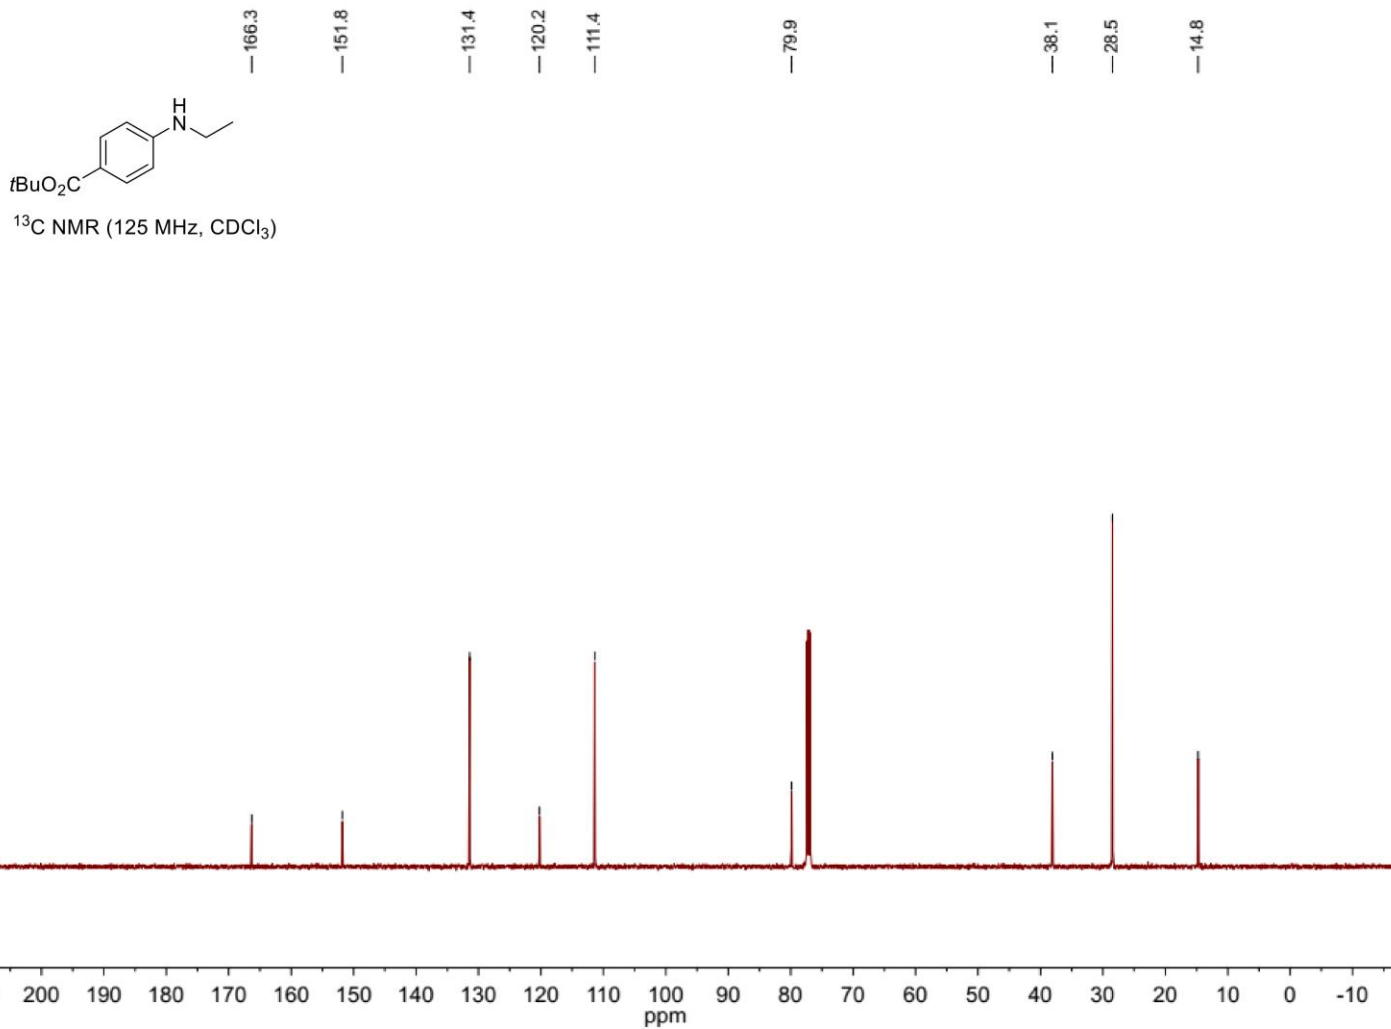



### N-Pentadecyl-4-(trifluoromethyl)aniline (9)

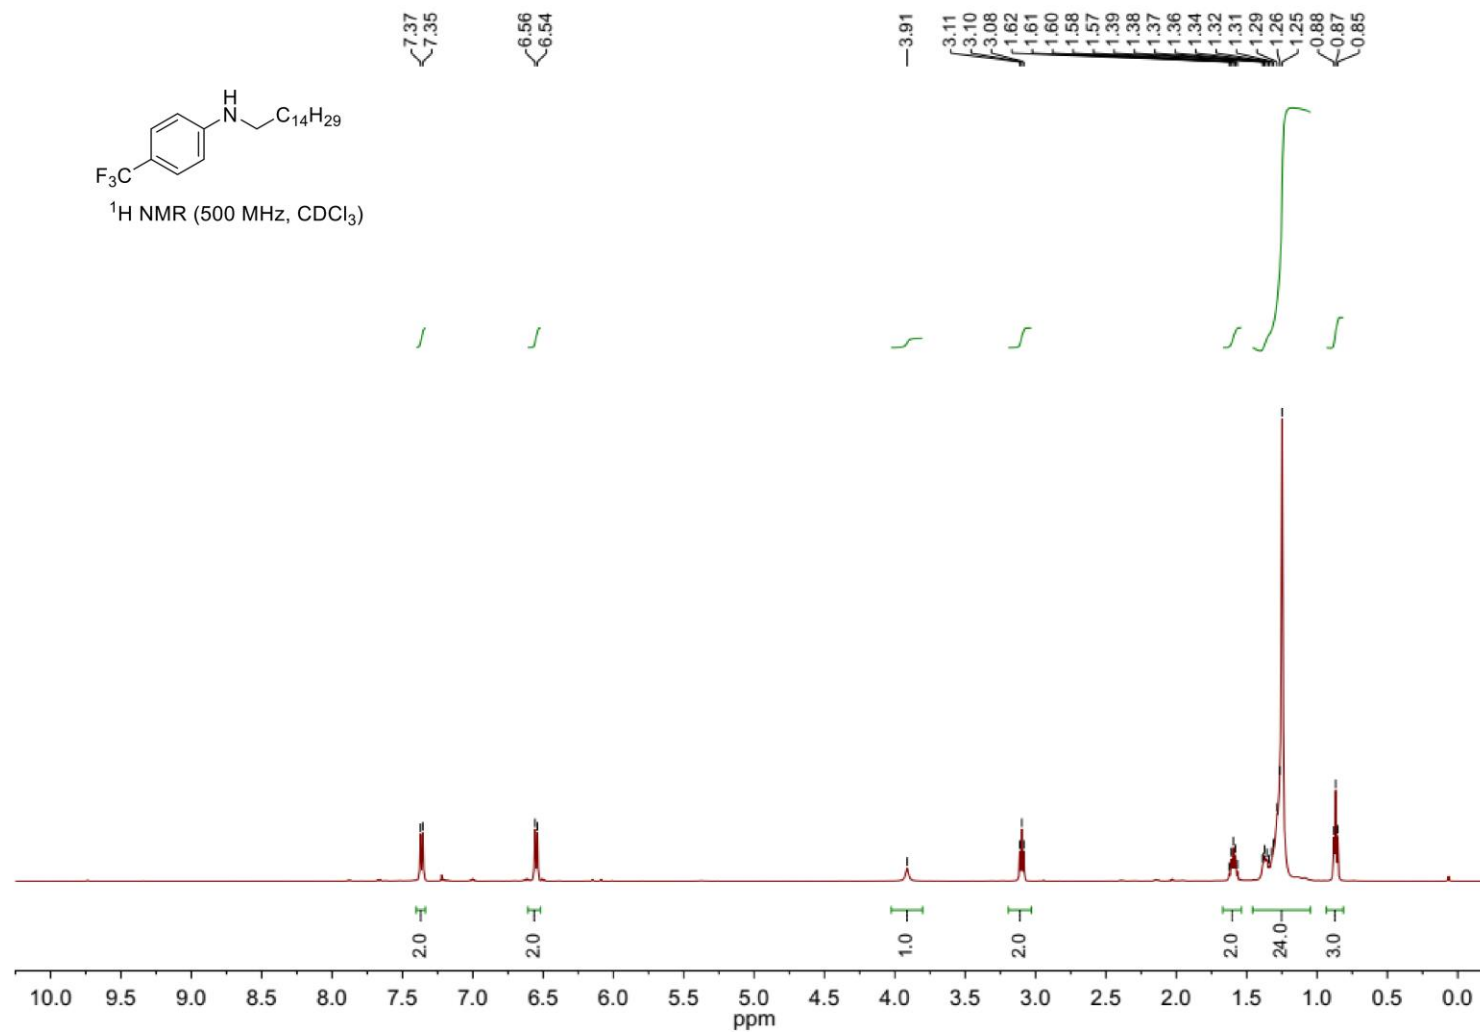

### N-Pentadecyl-4-(trifluoromethyl)aniline (9)

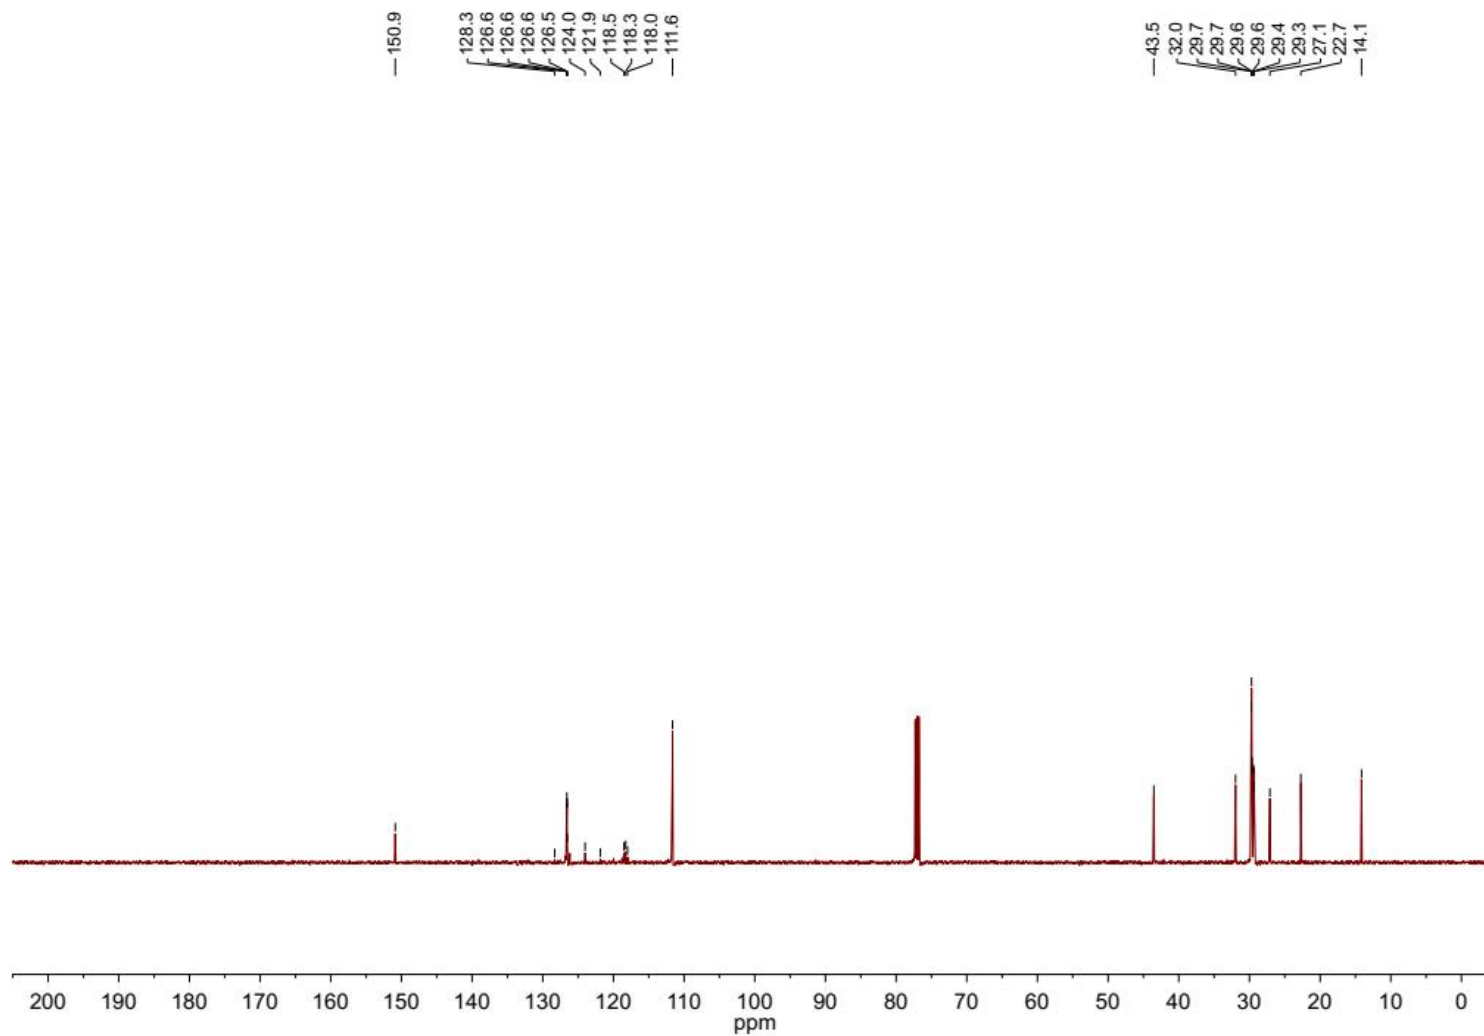

[Go back to table of contents](#)

### N-Methyl-4-(trifluoromethyl)aniline (10)

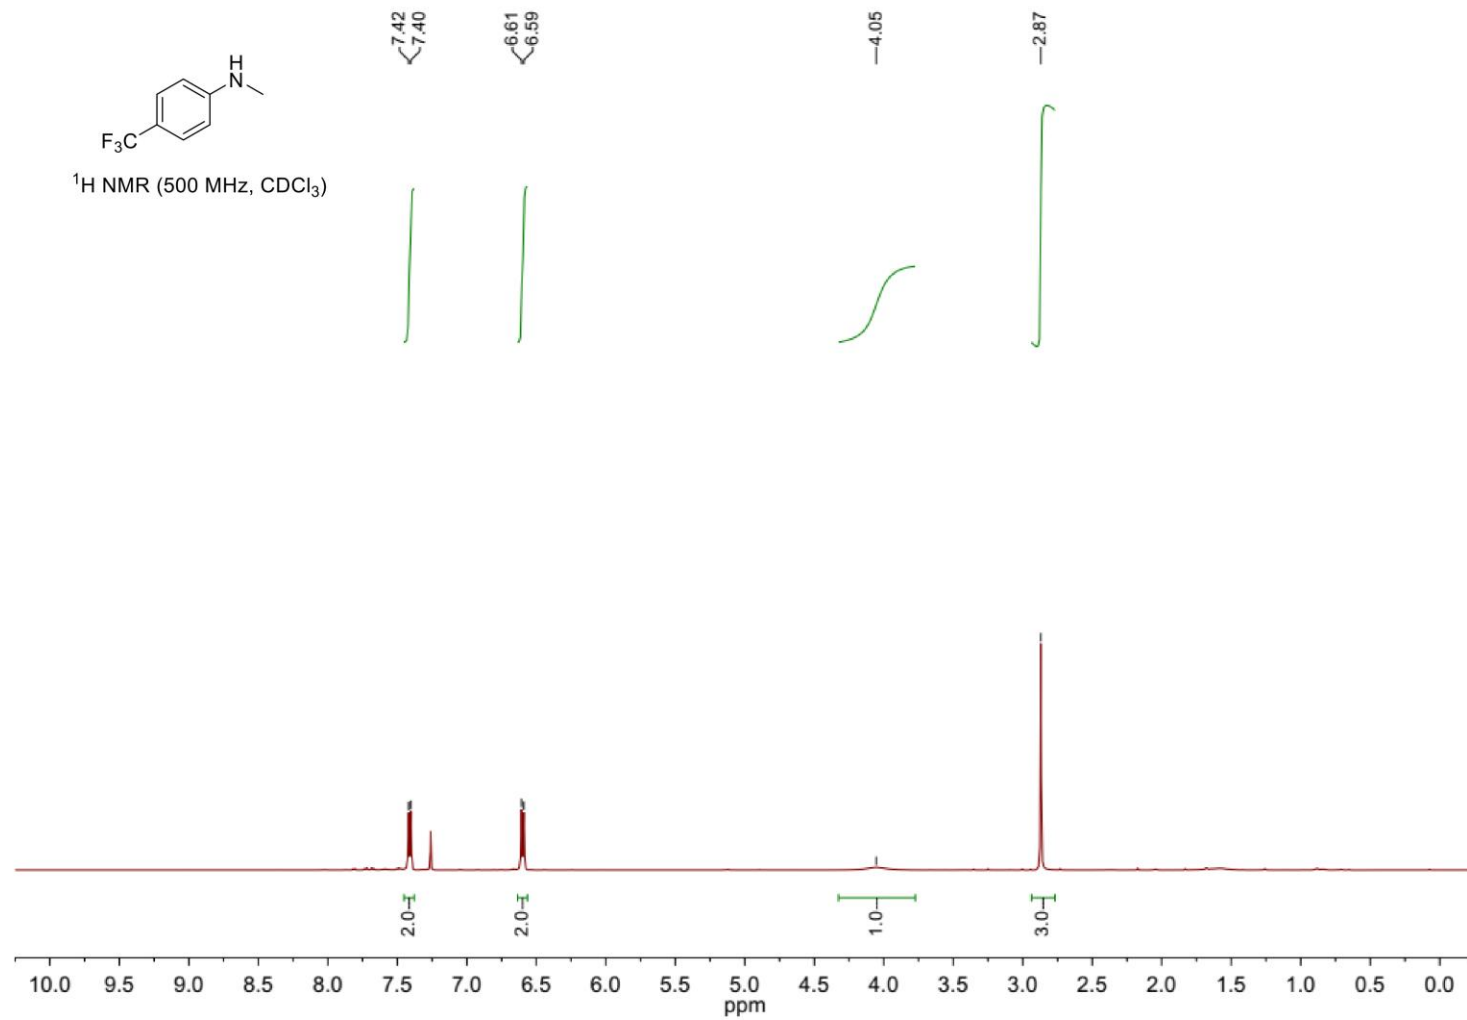

## N-Methyl-4-(trifluoromethyl)aniline (10)

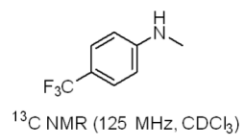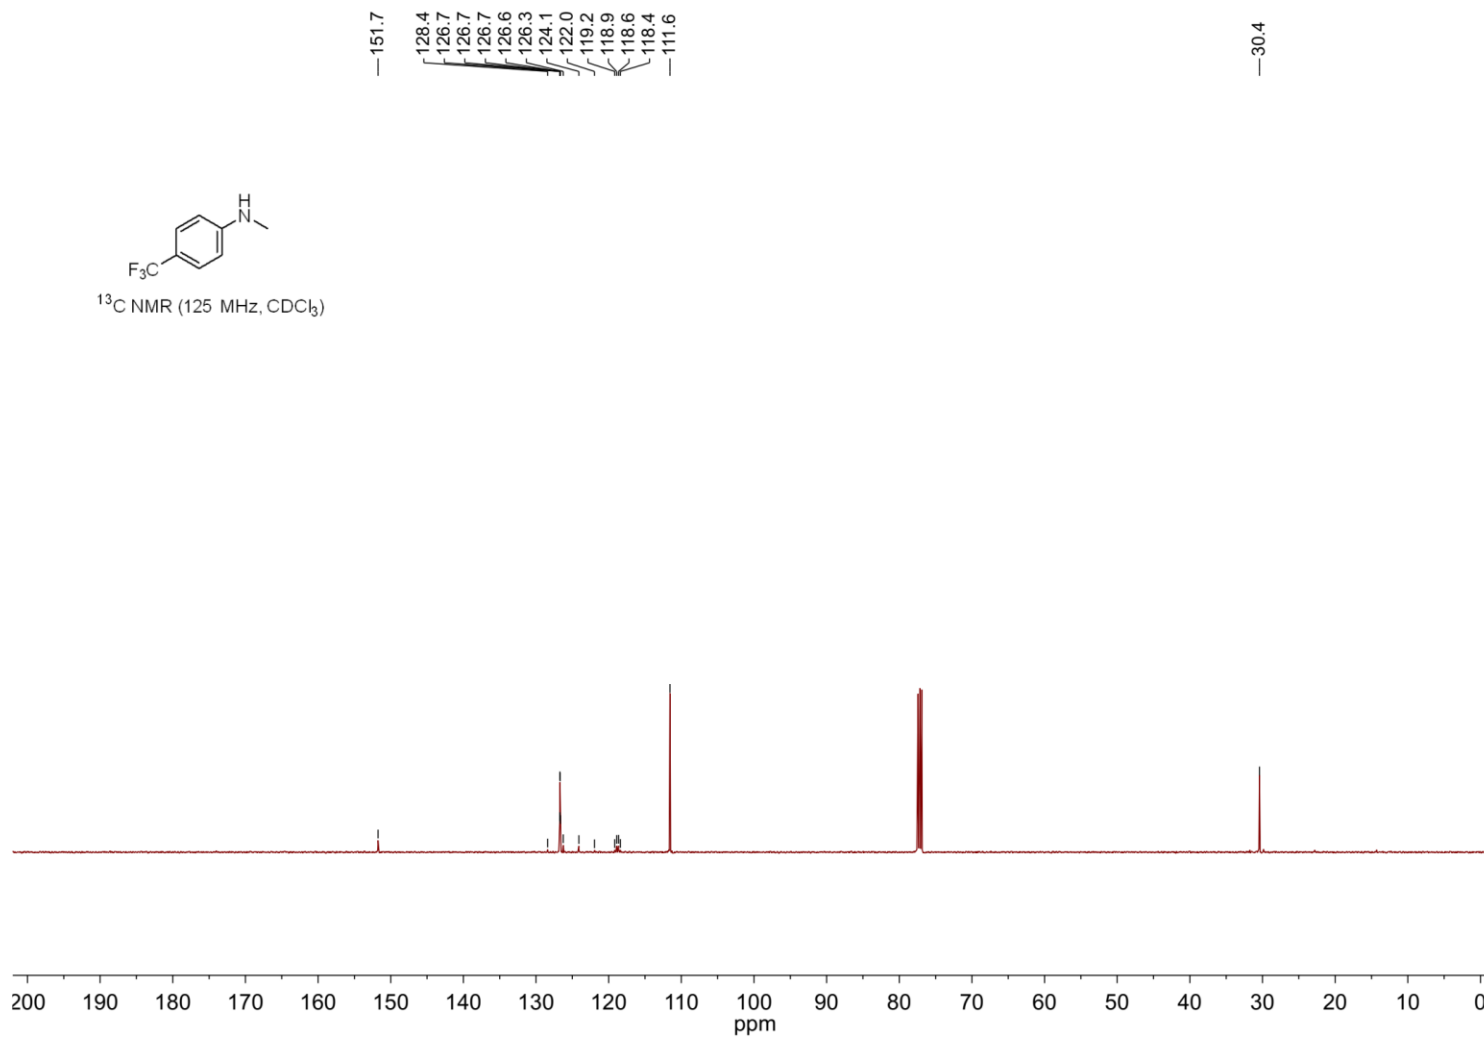

### 3-(Methylsulfonyl)-N-pentylaniline (11)

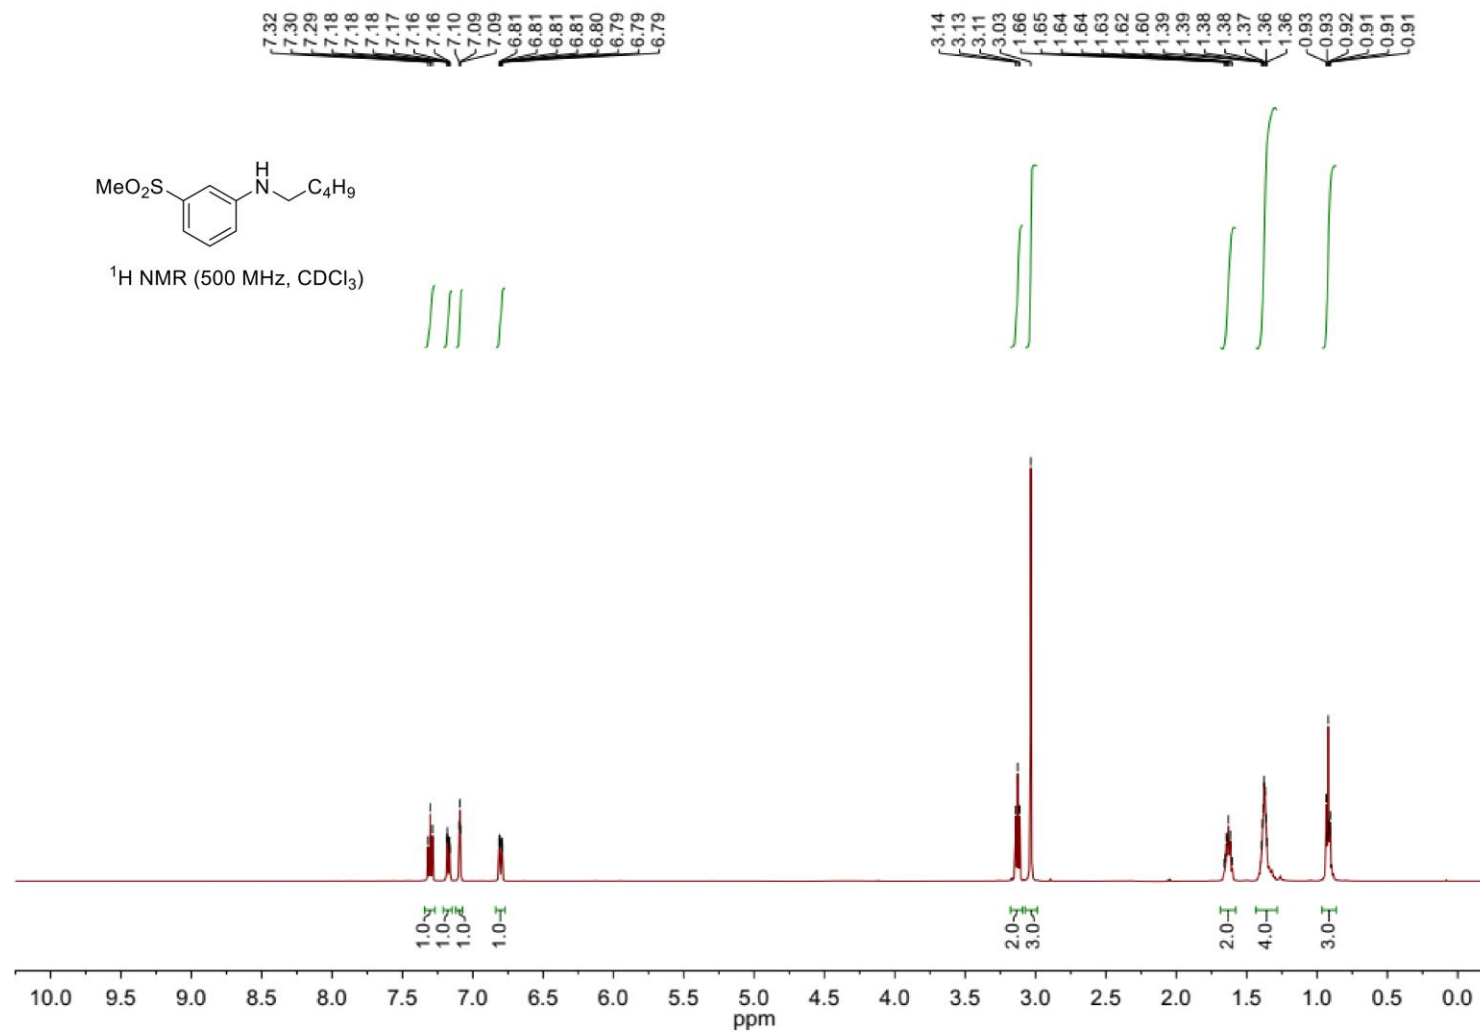

### 3-(Methylsulfonyl)-N-pentylaniline (11)

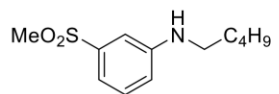

$^{13}\text{C}$  NMR (125 MHz,  $\text{CDCl}_3$ )

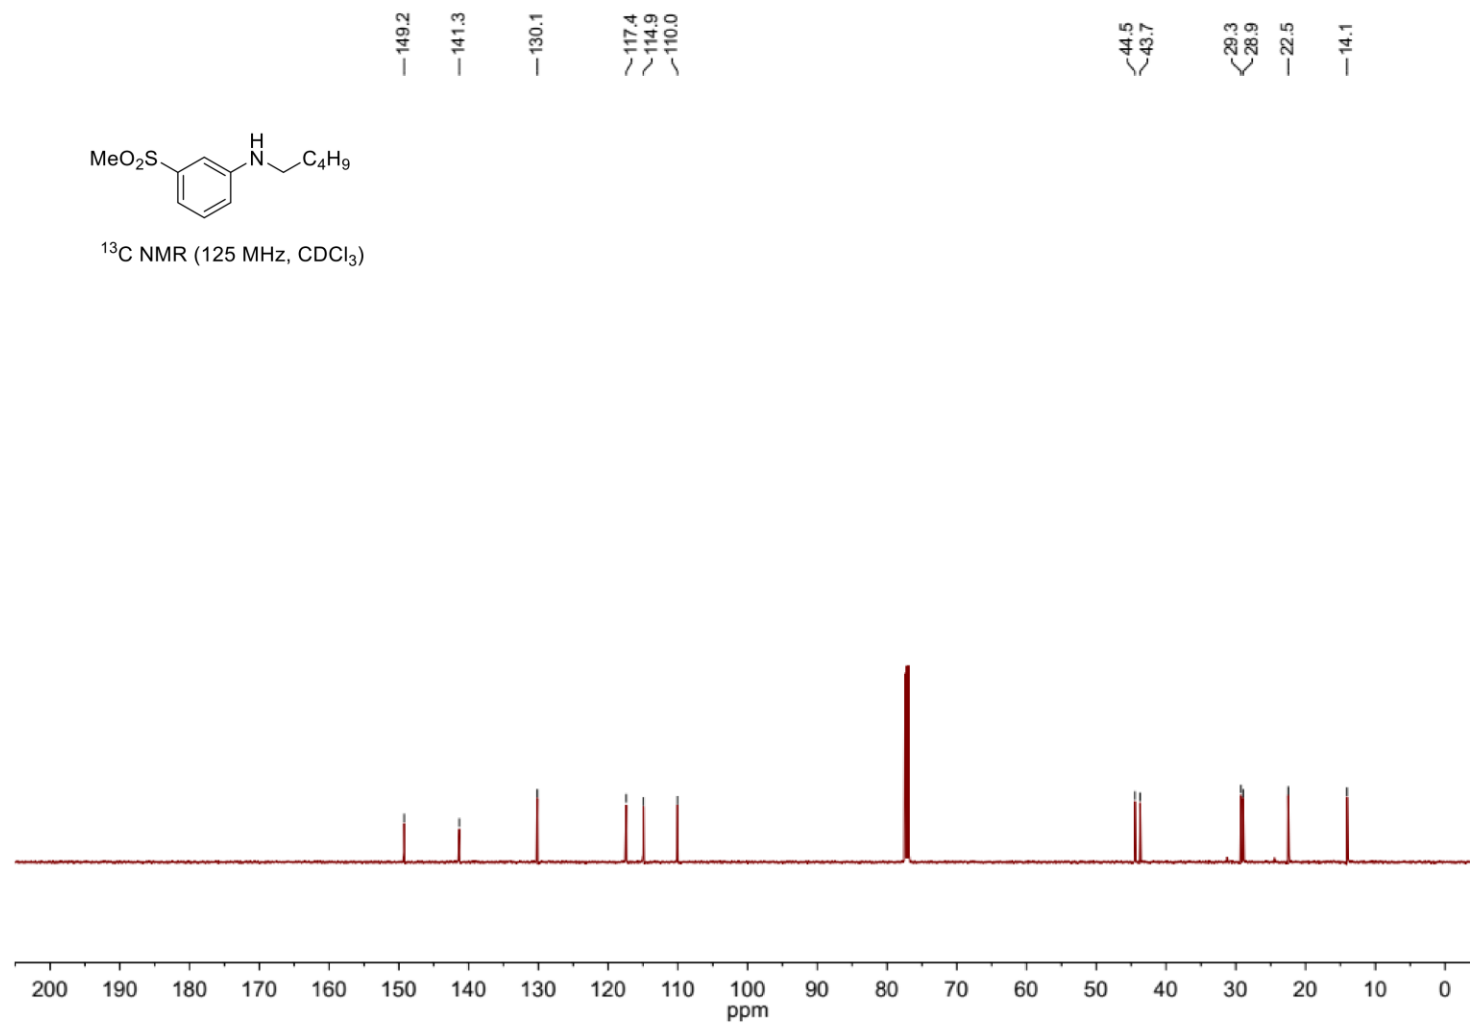

[Go back to table of contents](#)

***N*-Isobutyl-3-(4,4,5,5-tetramethyl-1,3,2-dioxaborolan-2-yl)aniline (12)**

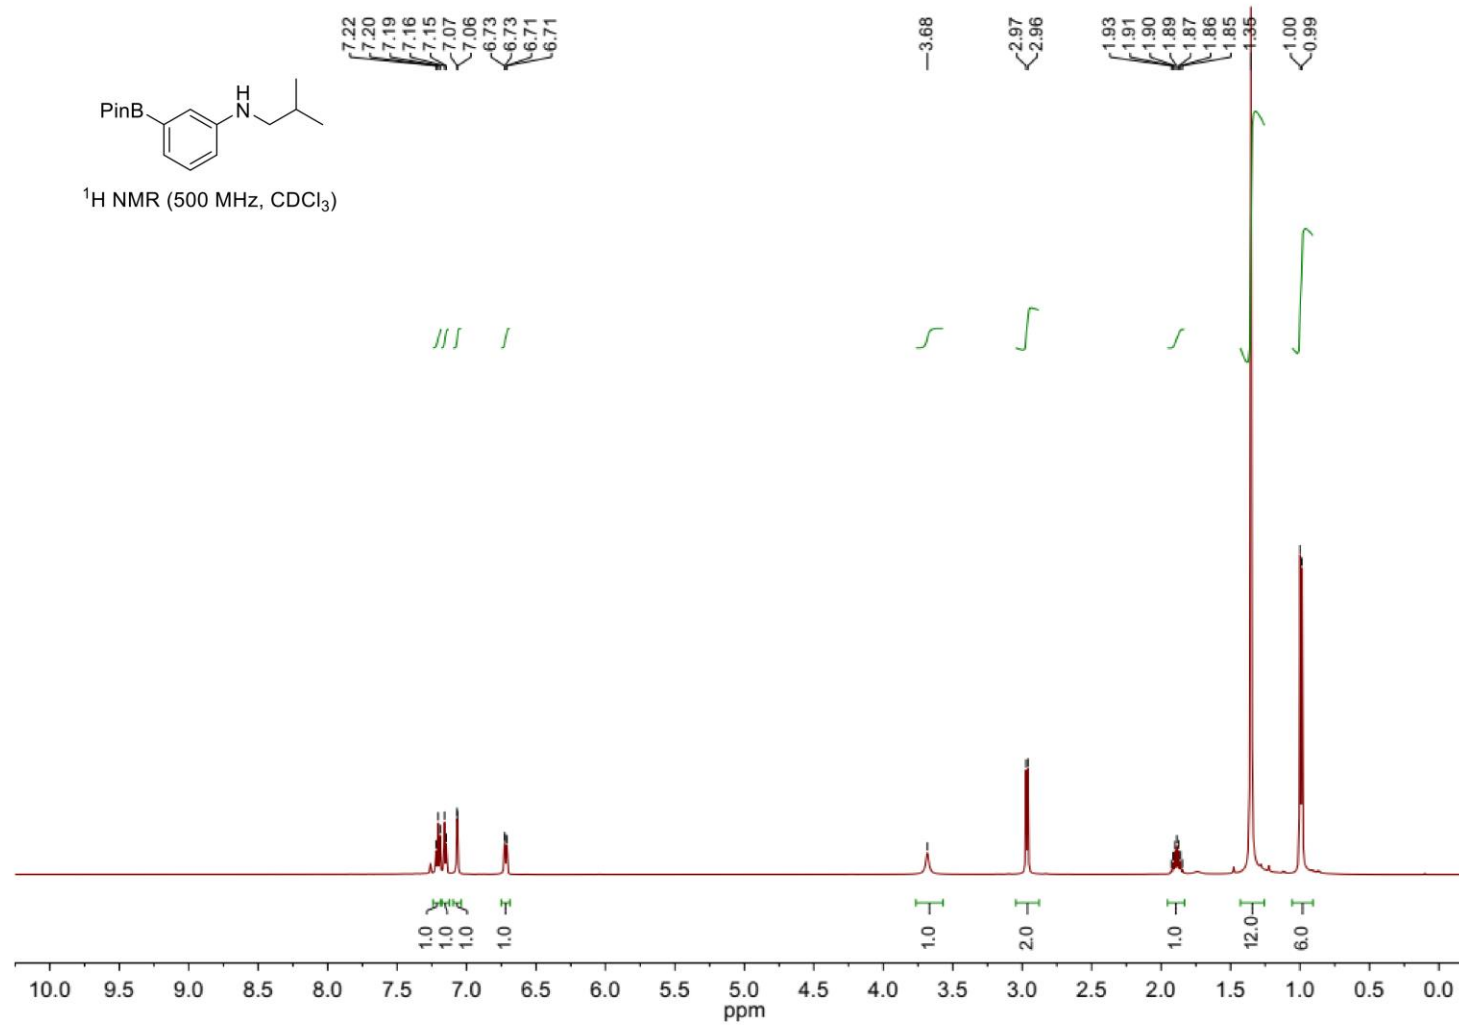

### *N*-Isobutyl-3-(4,4,5,5-tetramethyl-1,3,2-dioxaborolan-2-yl)aniline (12)

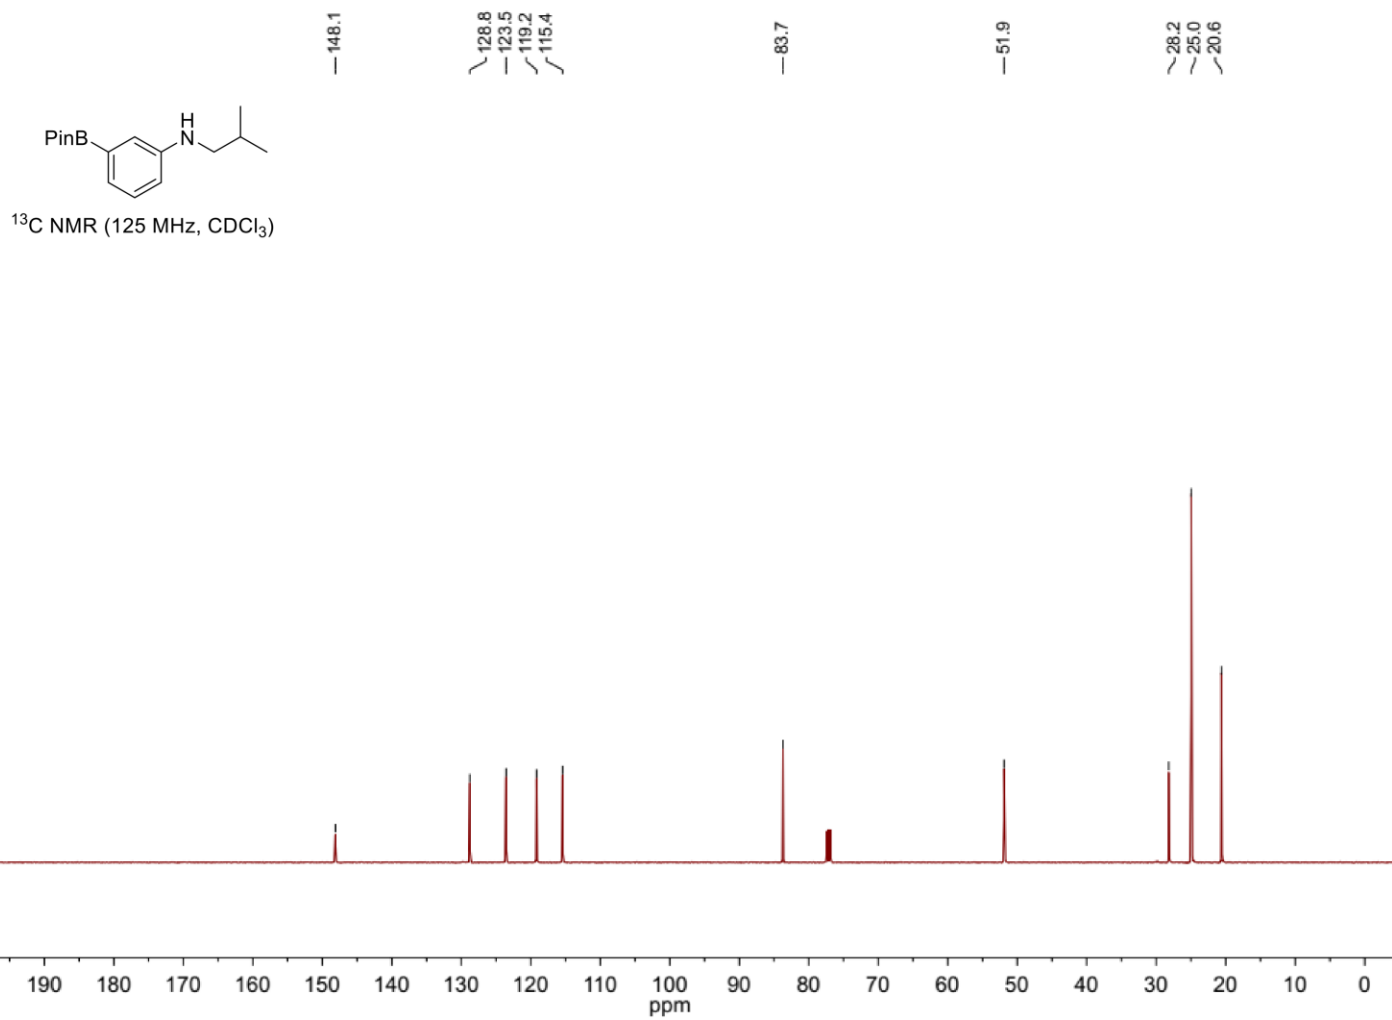

[Go back to table of contents](#)



## 2-(Pentylamino)benzonitrile (13)

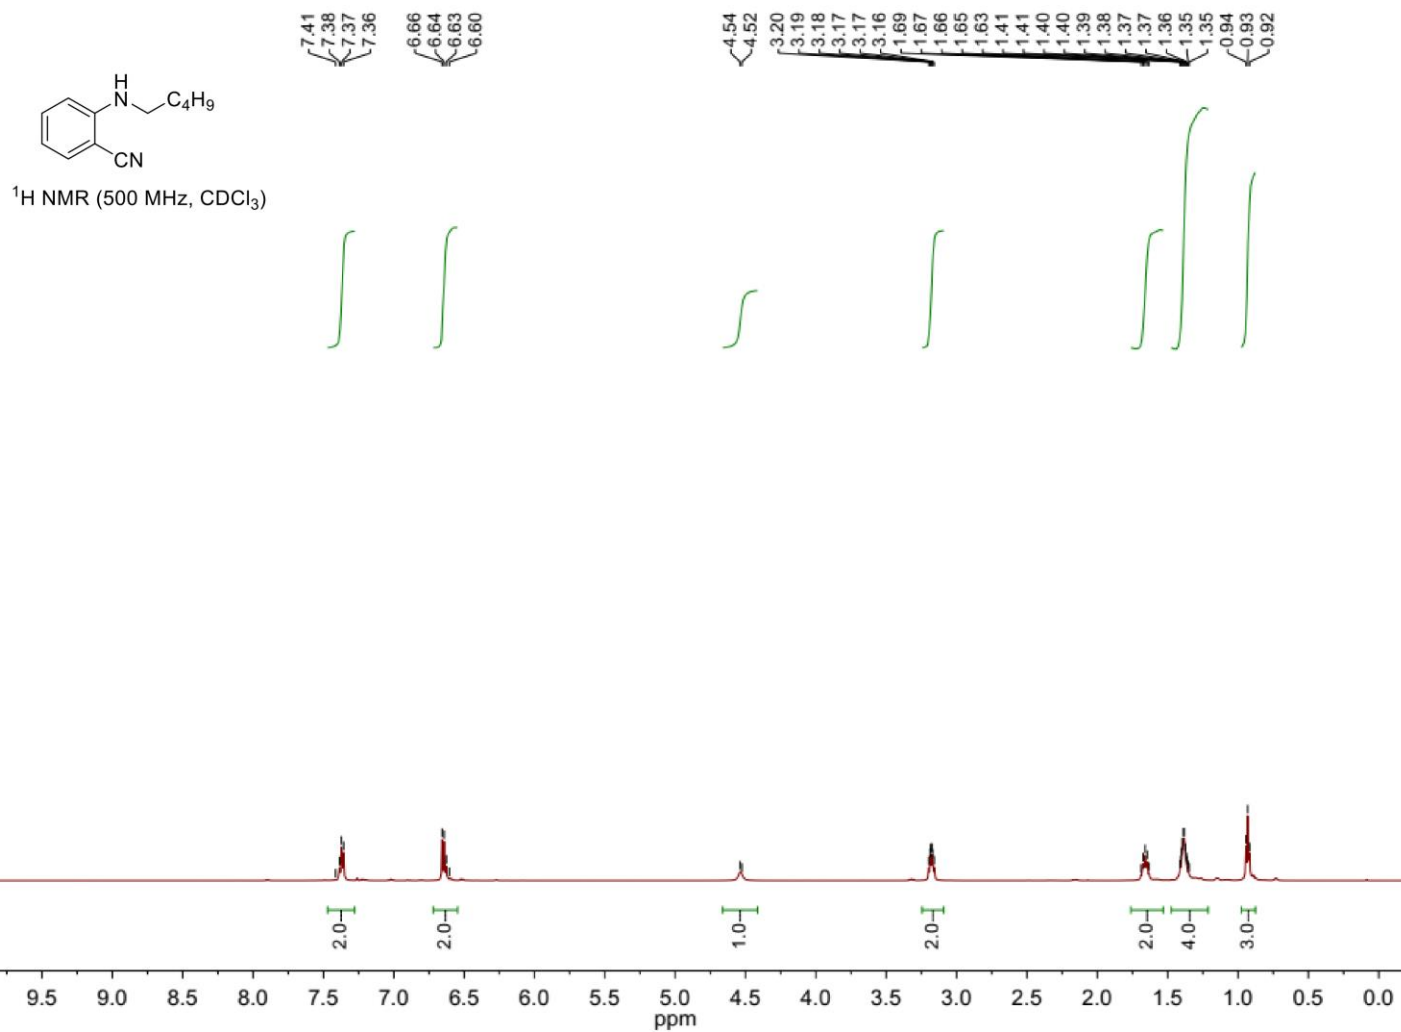

## 2-(Pentylamino)benzonitrile (13)

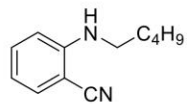

$^{13}\text{C}$  NMR (125 MHz,  $\text{CDCl}_3$ )

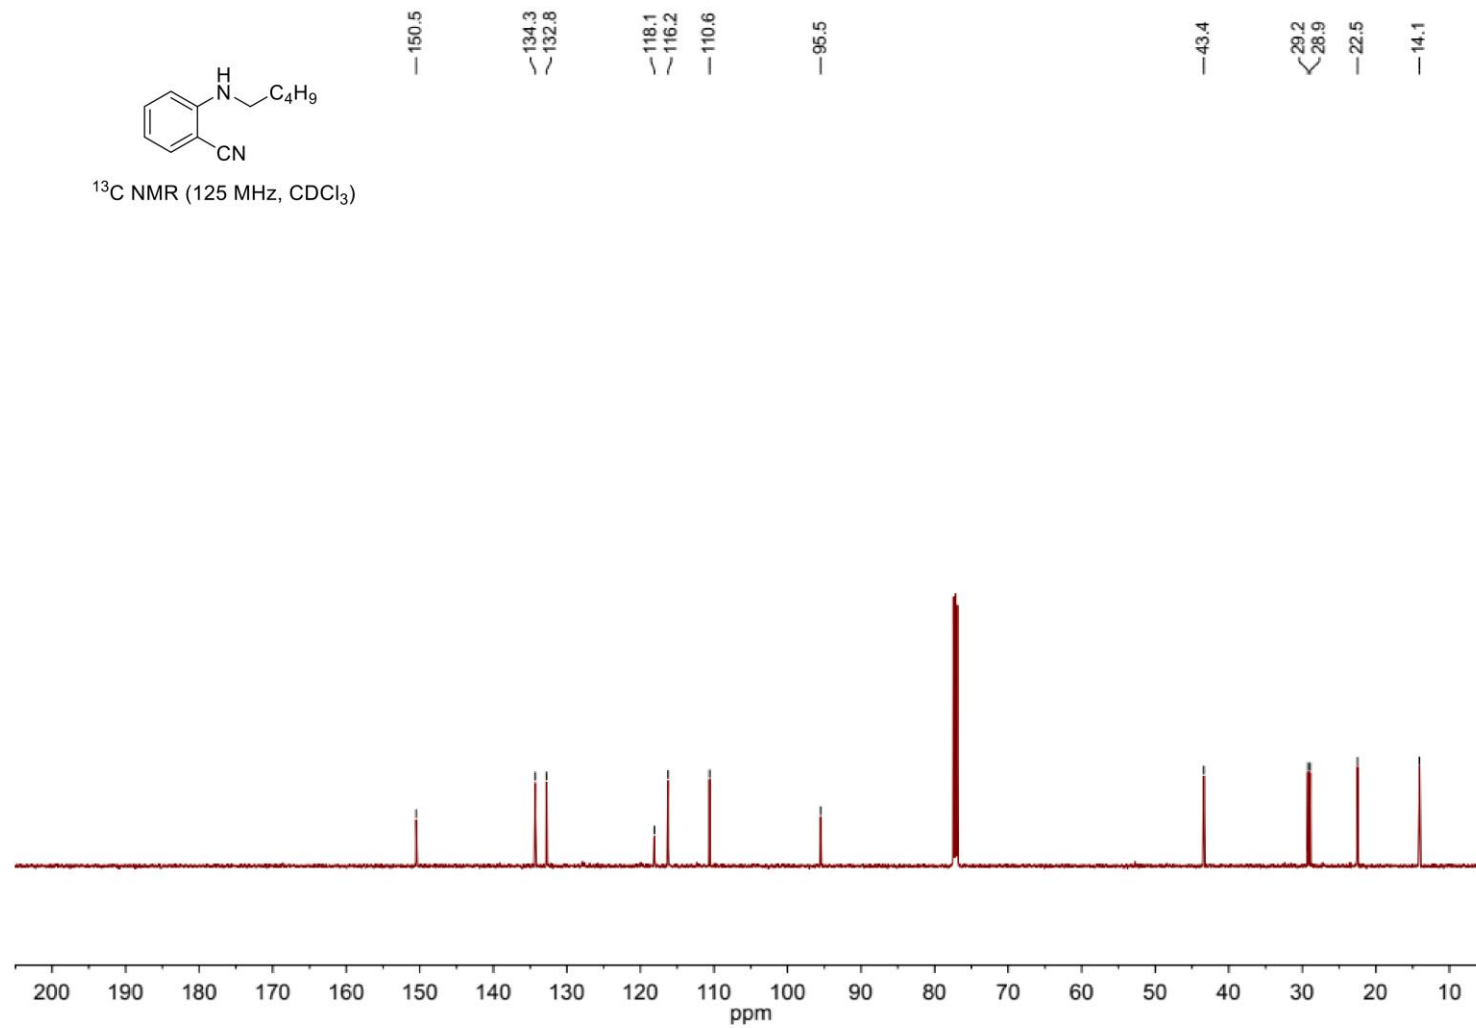

[Go back to table of contents](#)

## 2-(Ethylamino)benzonitrile (14)

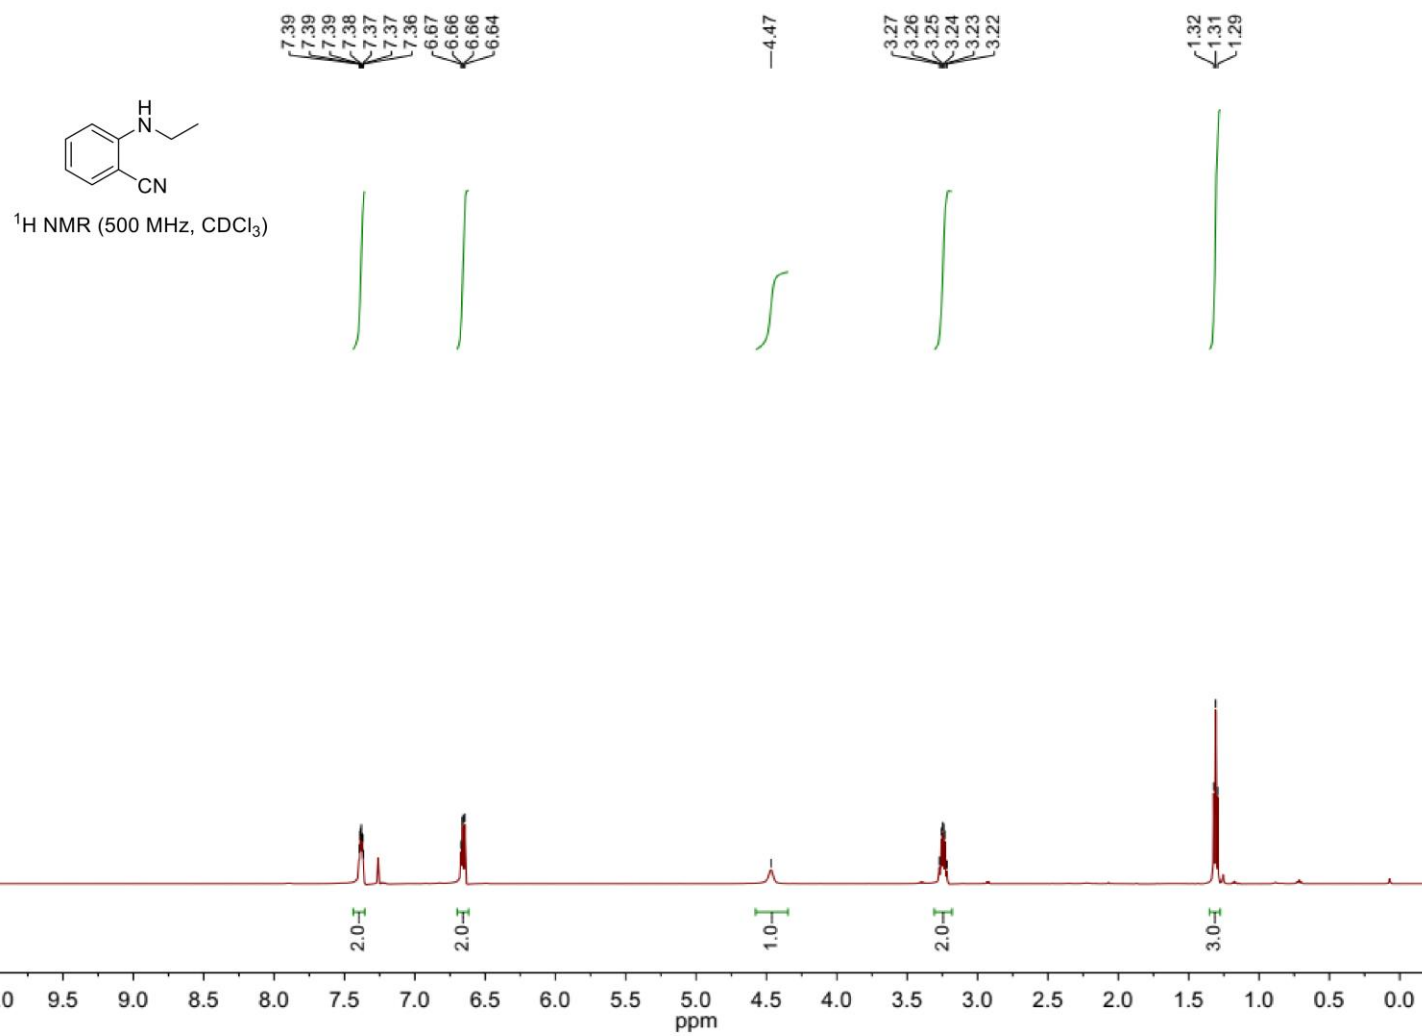

[Go back to table of contents](#)

## 2-(Ethylamino)benzonitrile (14)

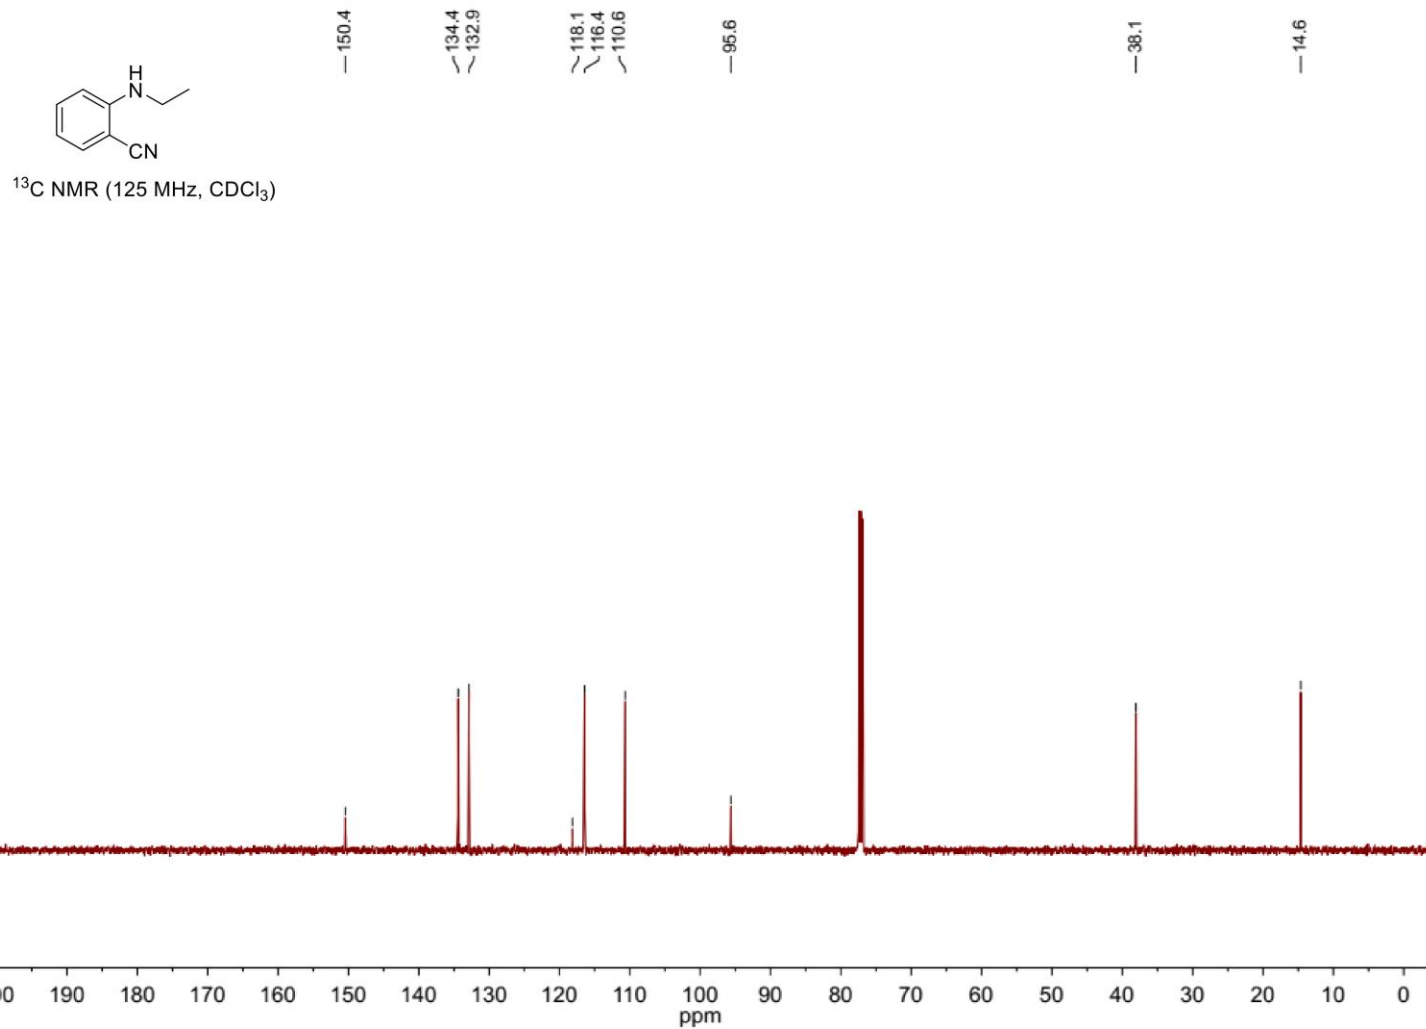

[Go back to table of contents](#)

### N-methylnaphthalen-1-amine (15)

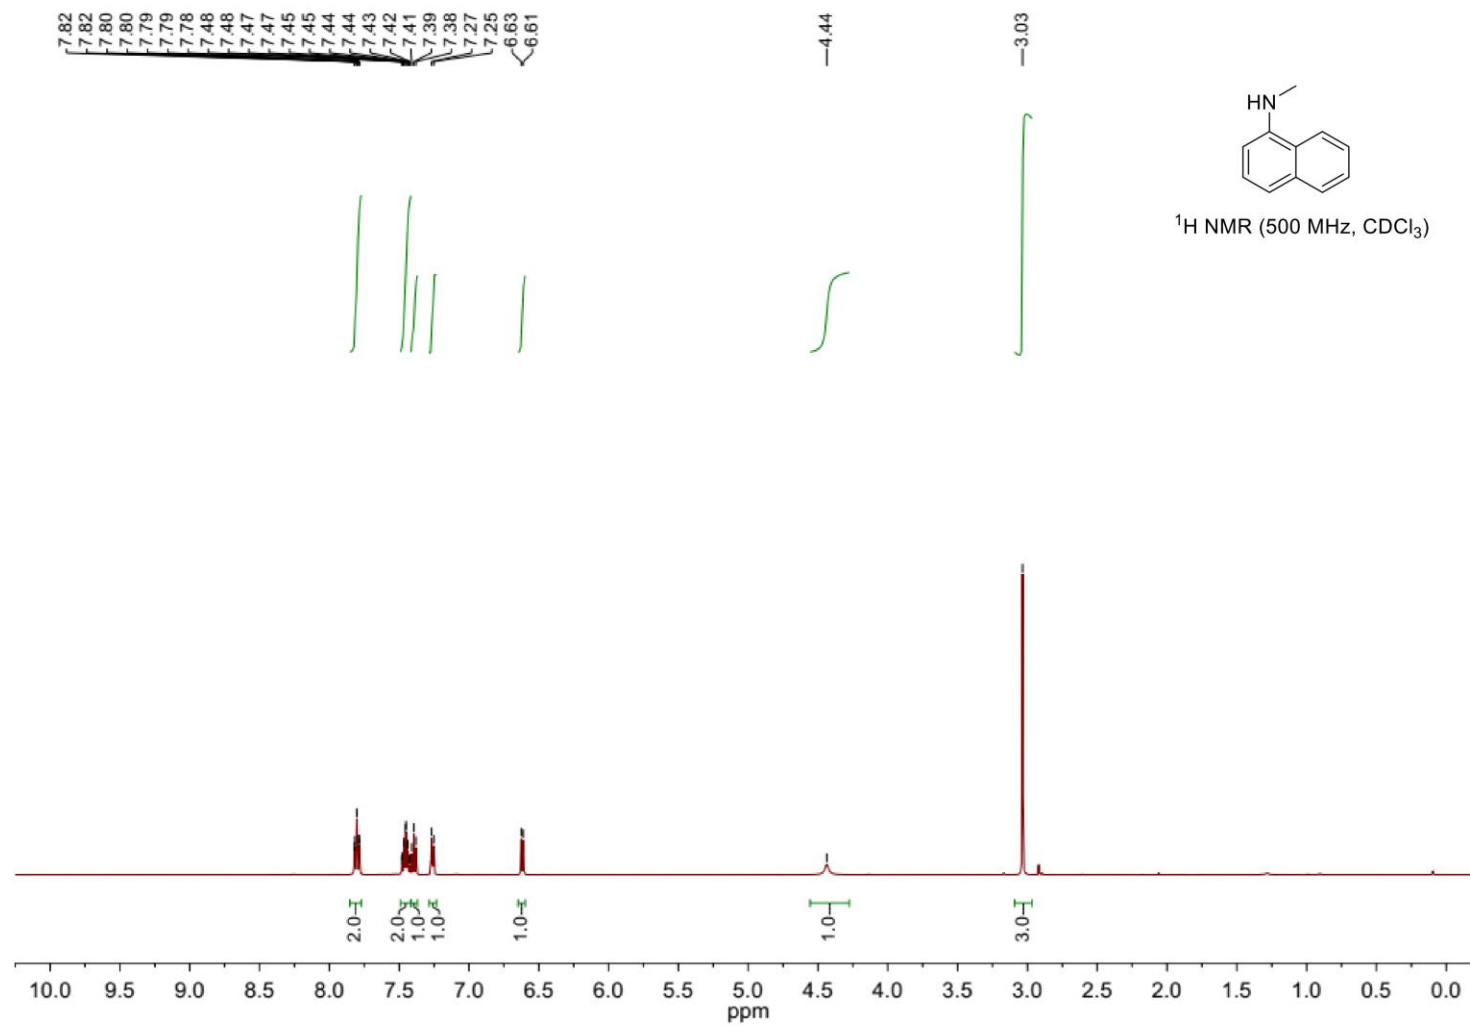

### N-methylnaphthalen-1-amine (15)

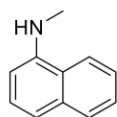

$^{13}\text{C}$  NMR (125 MHz,  $\text{CDCl}_3$ )

— 144.6  
— 134.3  
— 128.8  
— 126.8  
— 125.8  
— 124.8  
— 123.6  
— 119.9  
— 117.4  
— 103.9  
— 31.2

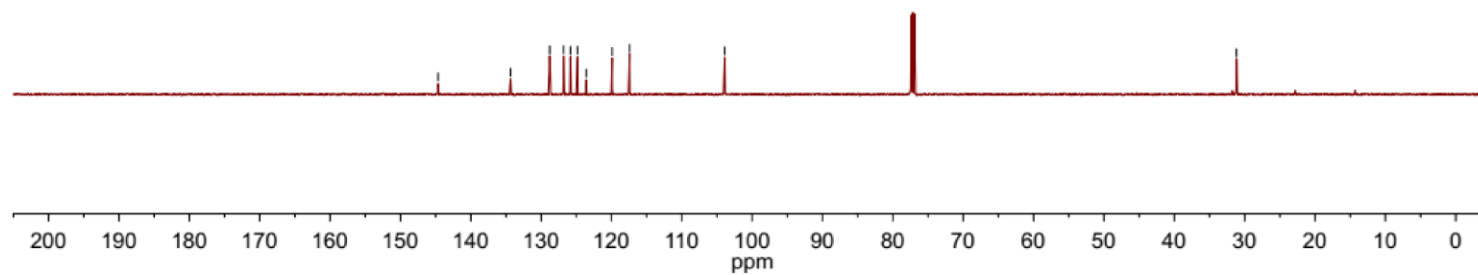

[Go back to table of contents](#)

### N-(5-Chloropentyl)-3,5-bis(trifluoromethyl)aniline (16)

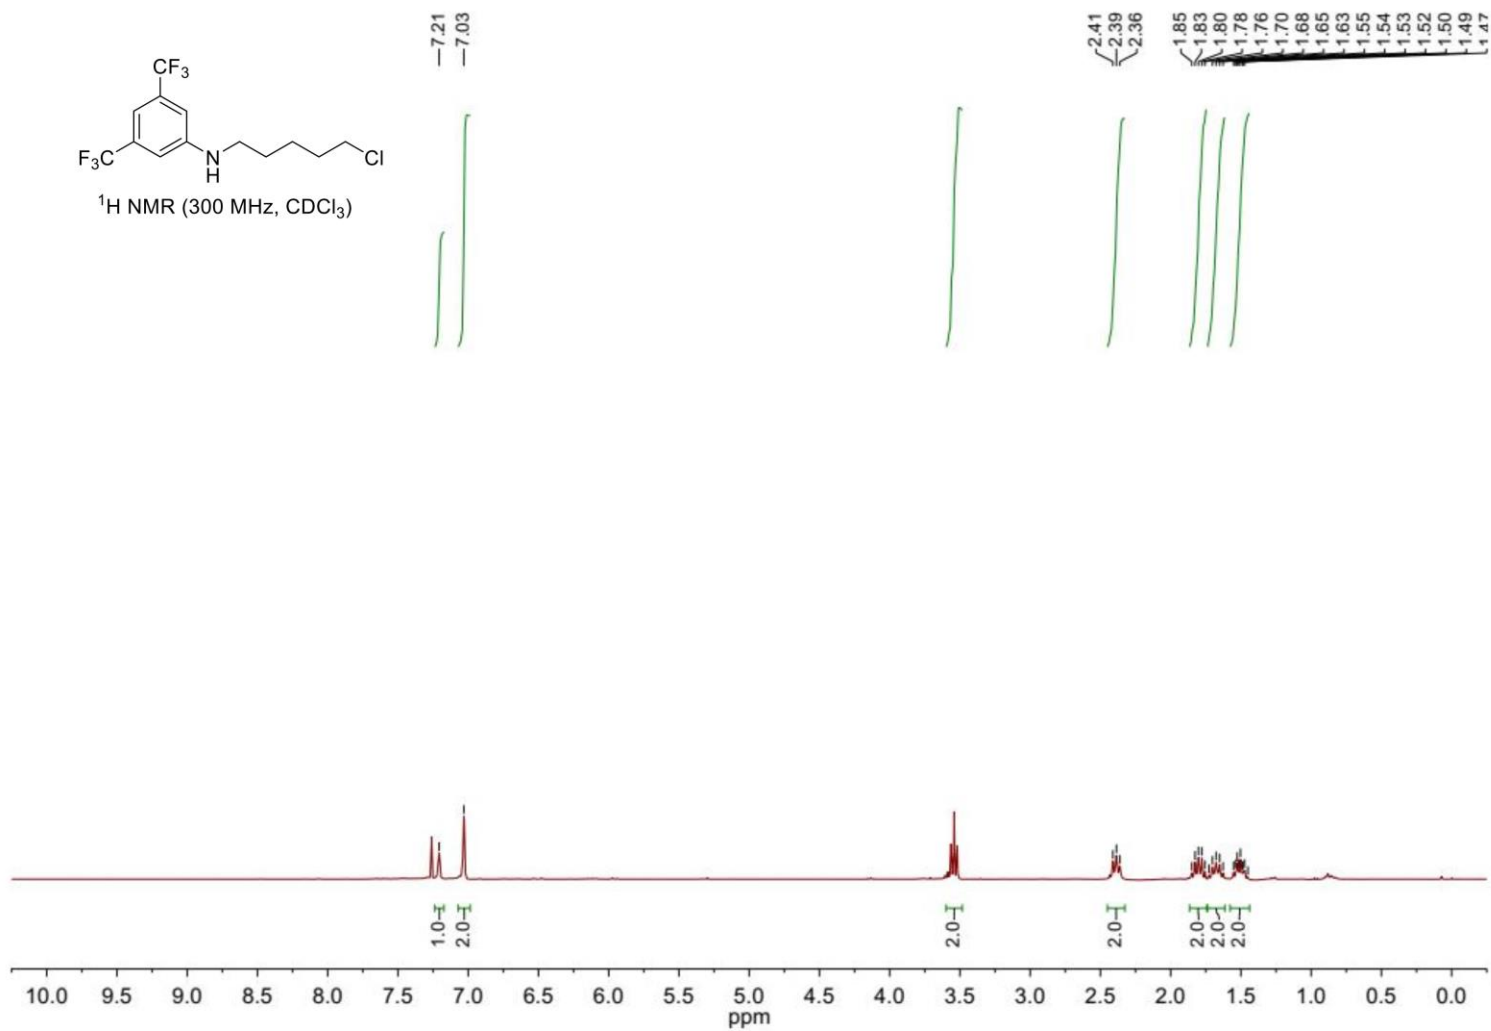

[Go back to table of contents](#)

### N-(5-Chloropentyl)-3,5-bis(trifluoromethyl)aniline (16)

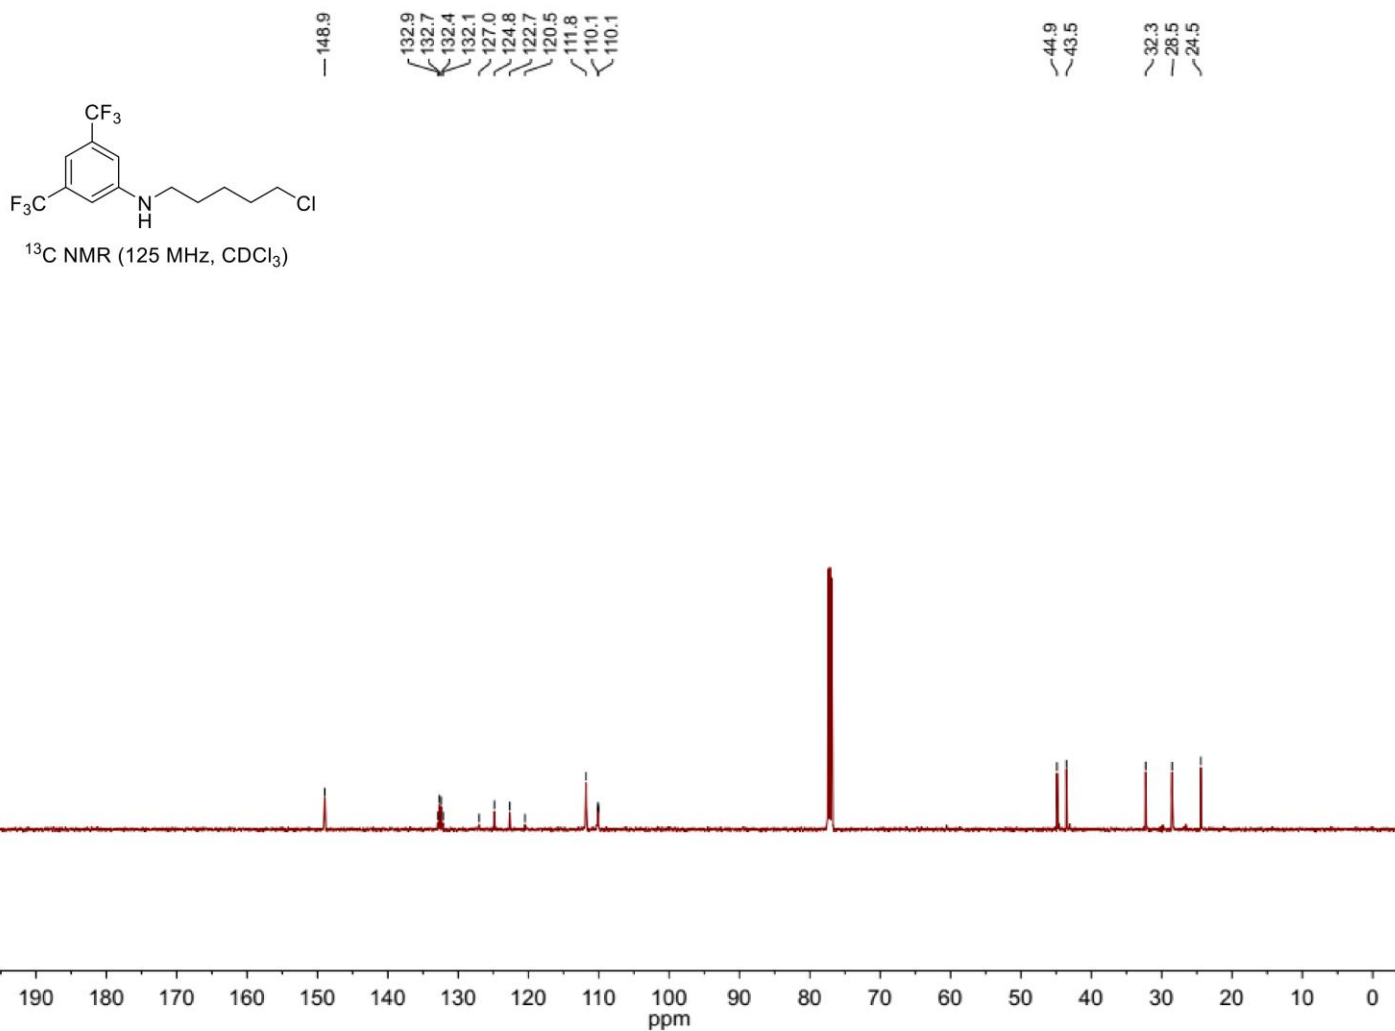

[Go back to table of contents](#)



### N-Cyclohexyl-4-methoxyaniline (17)

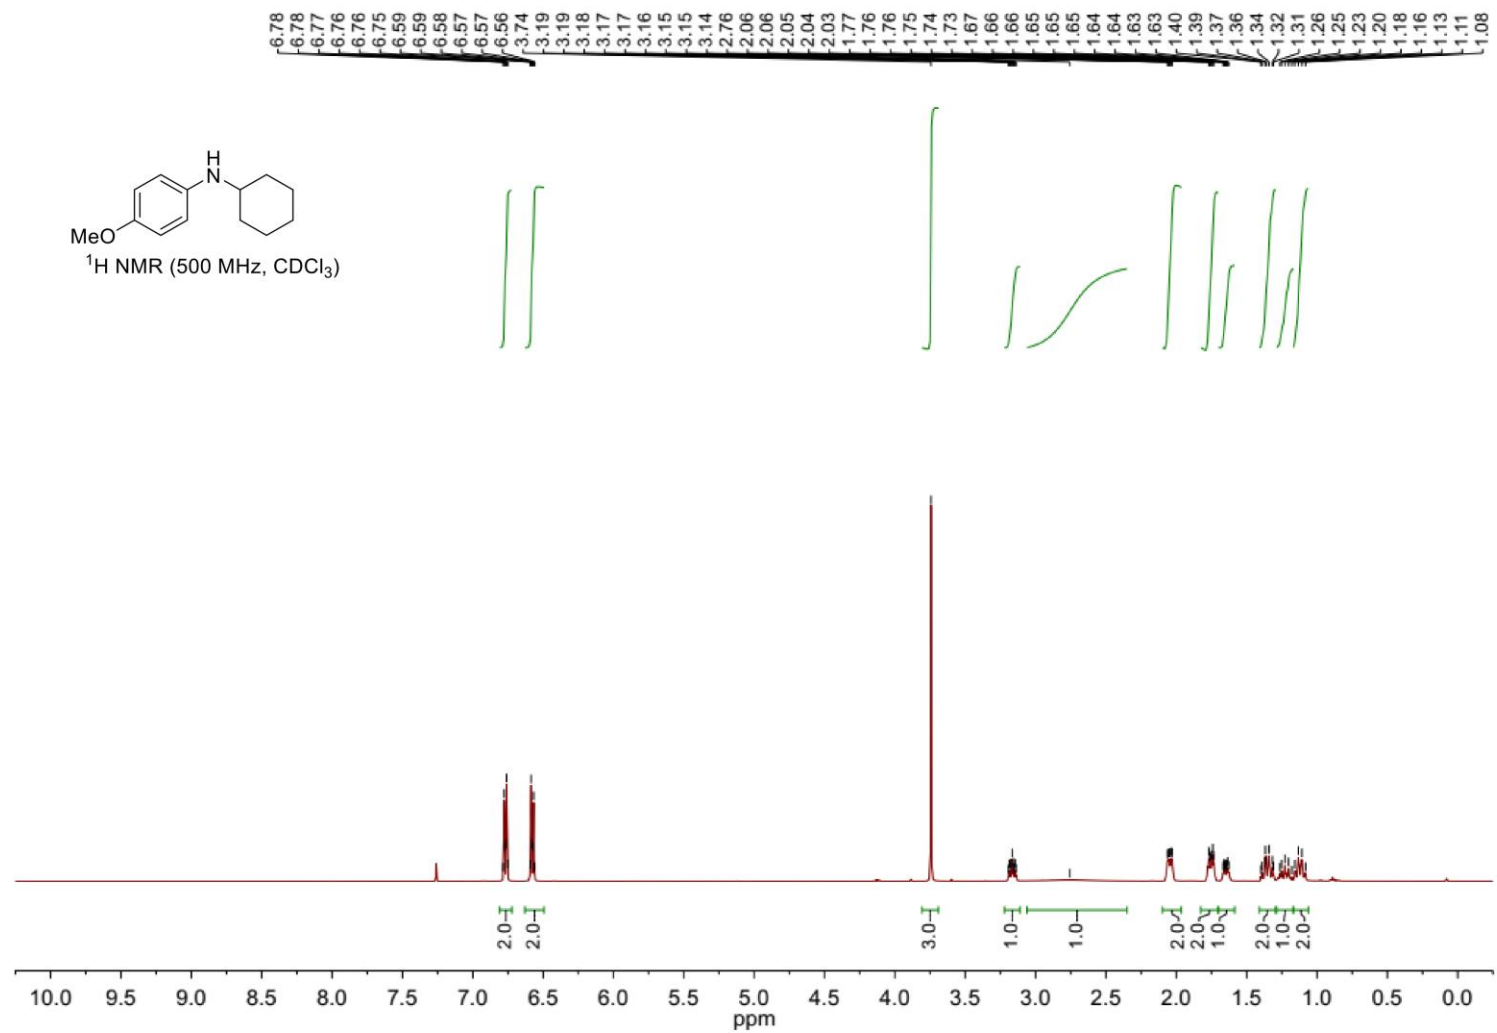

[Go back to table of contents](#)

### N-Cyclohexyl-4-methoxyaniline (17)

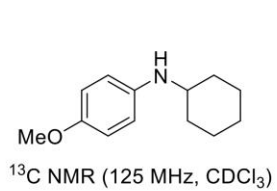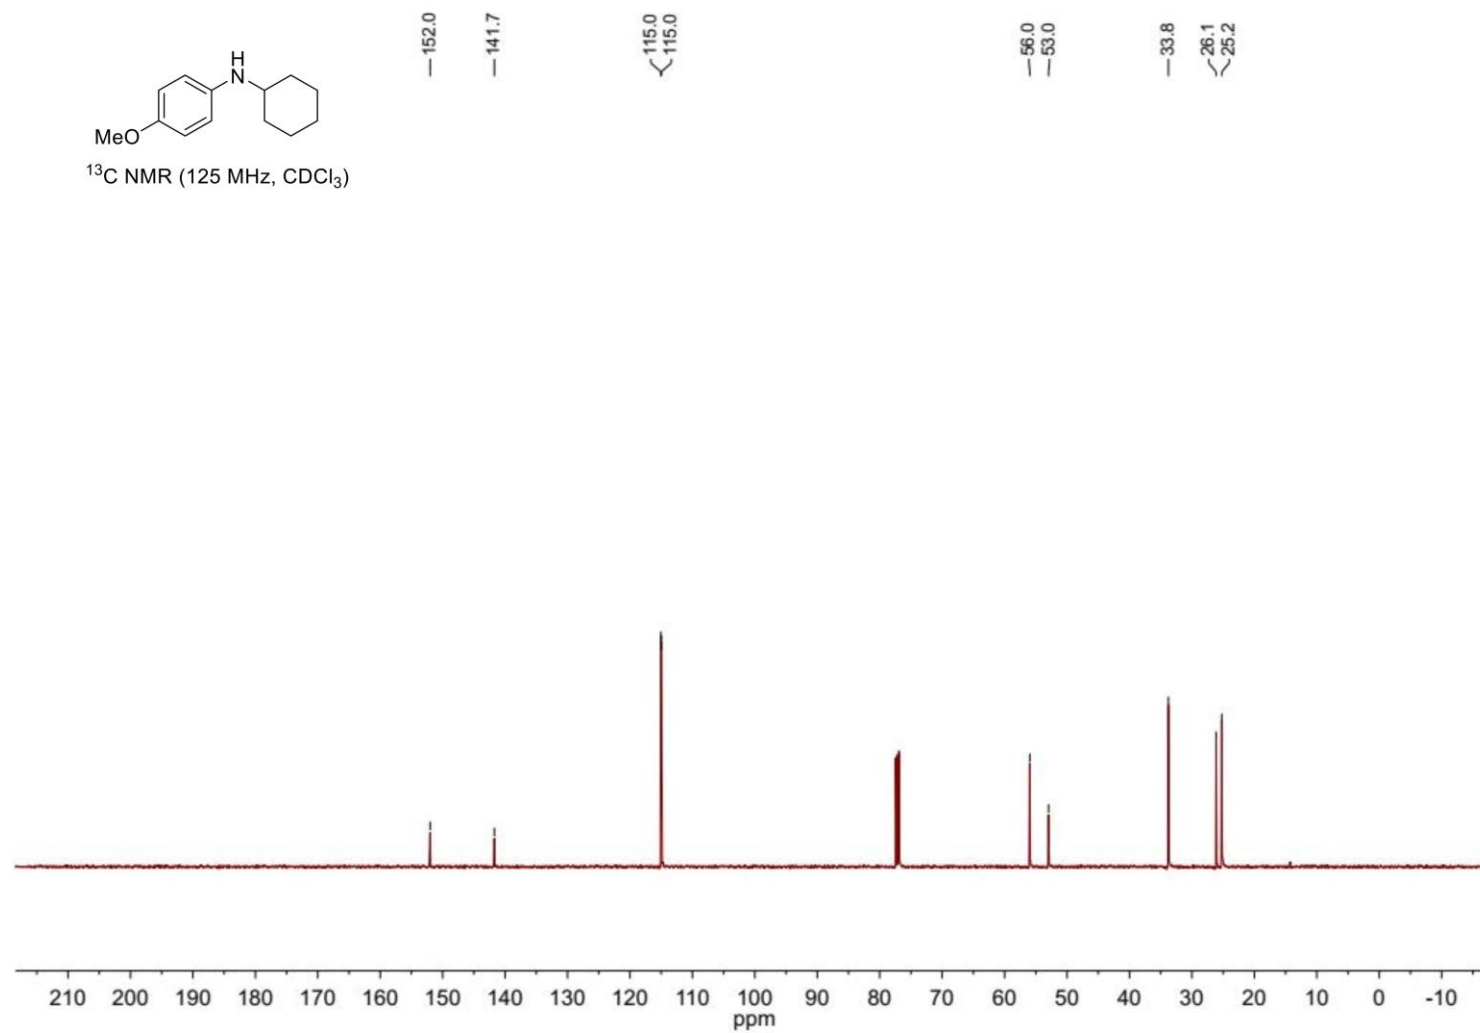

### N-Cyclohexyl-4-(difluoromethoxy)aniline (18)

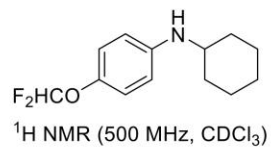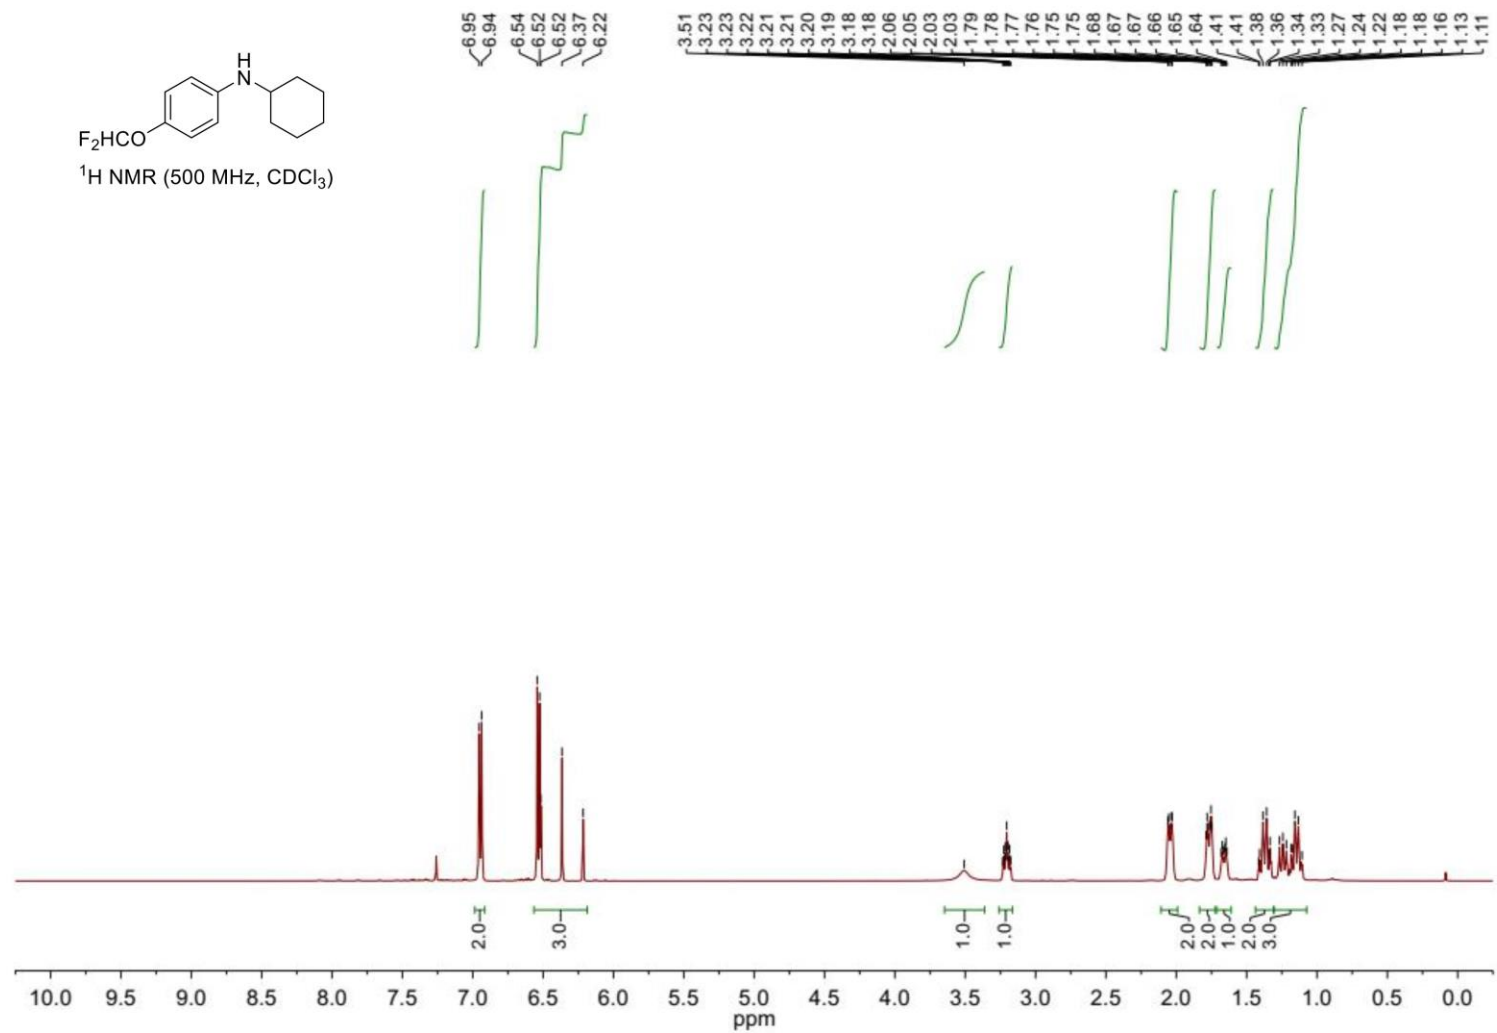

### N-Cyclohexyl-4-(difluoromethoxy)aniline (18)

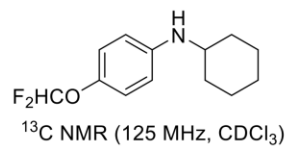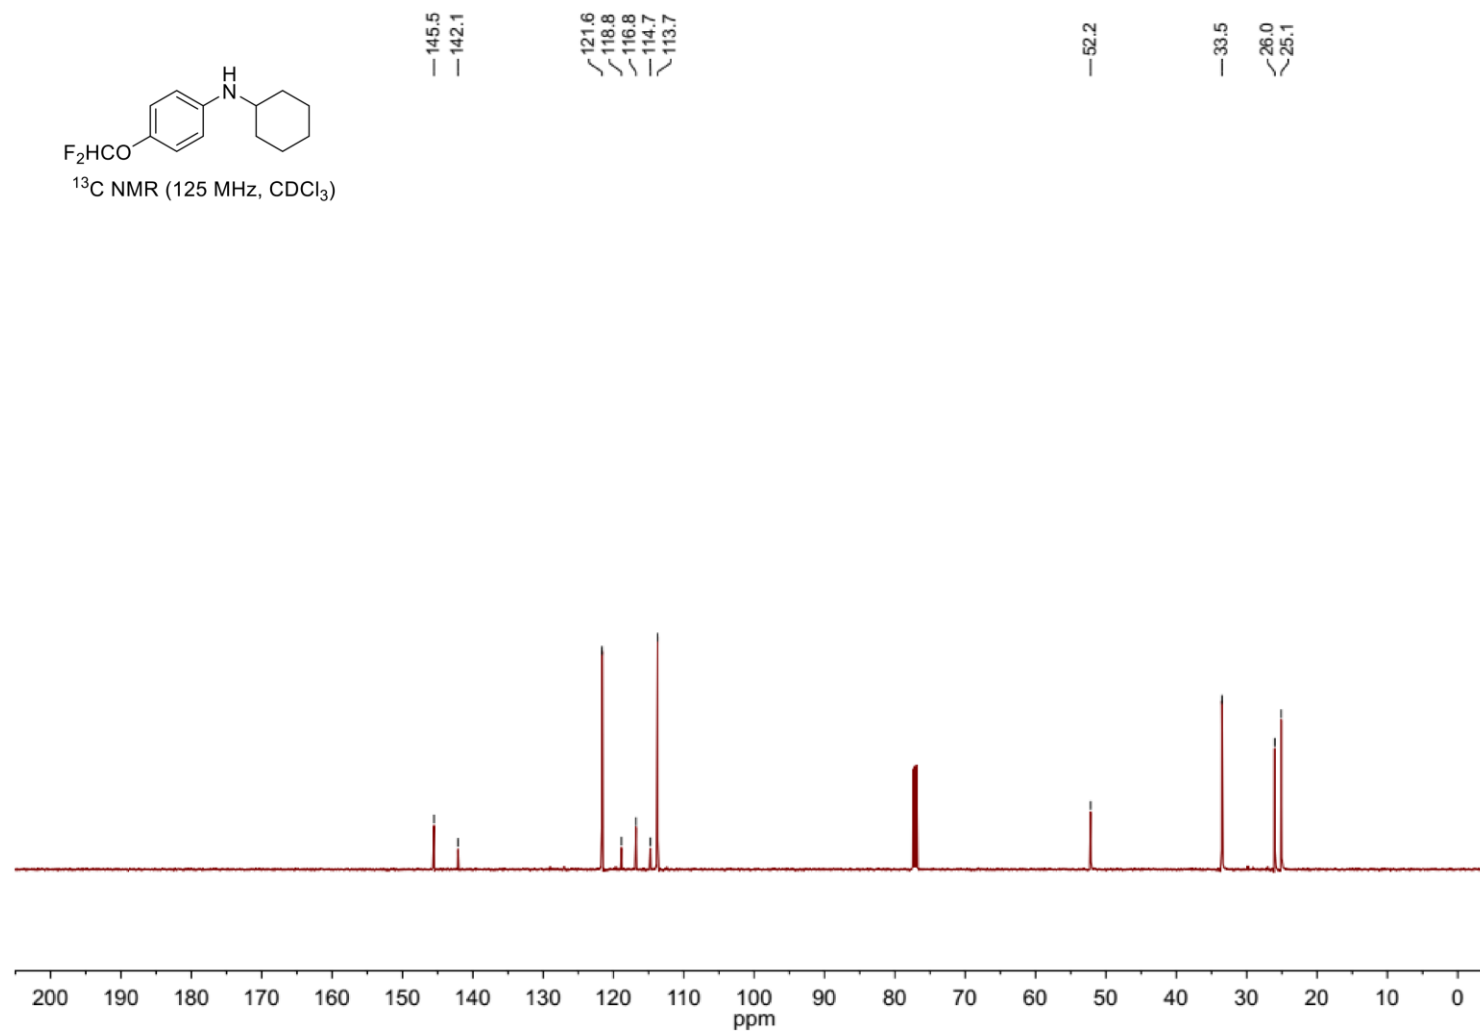

[Go back to table of contents](#)

# N-(4-(Difluoromethoxy)phenyl)tetrahydro-2H-pyran-4-amine (19)

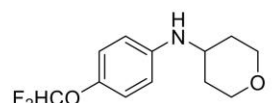

<sup>1</sup>H NMR (500 MHz, CDCl<sub>3</sub>)

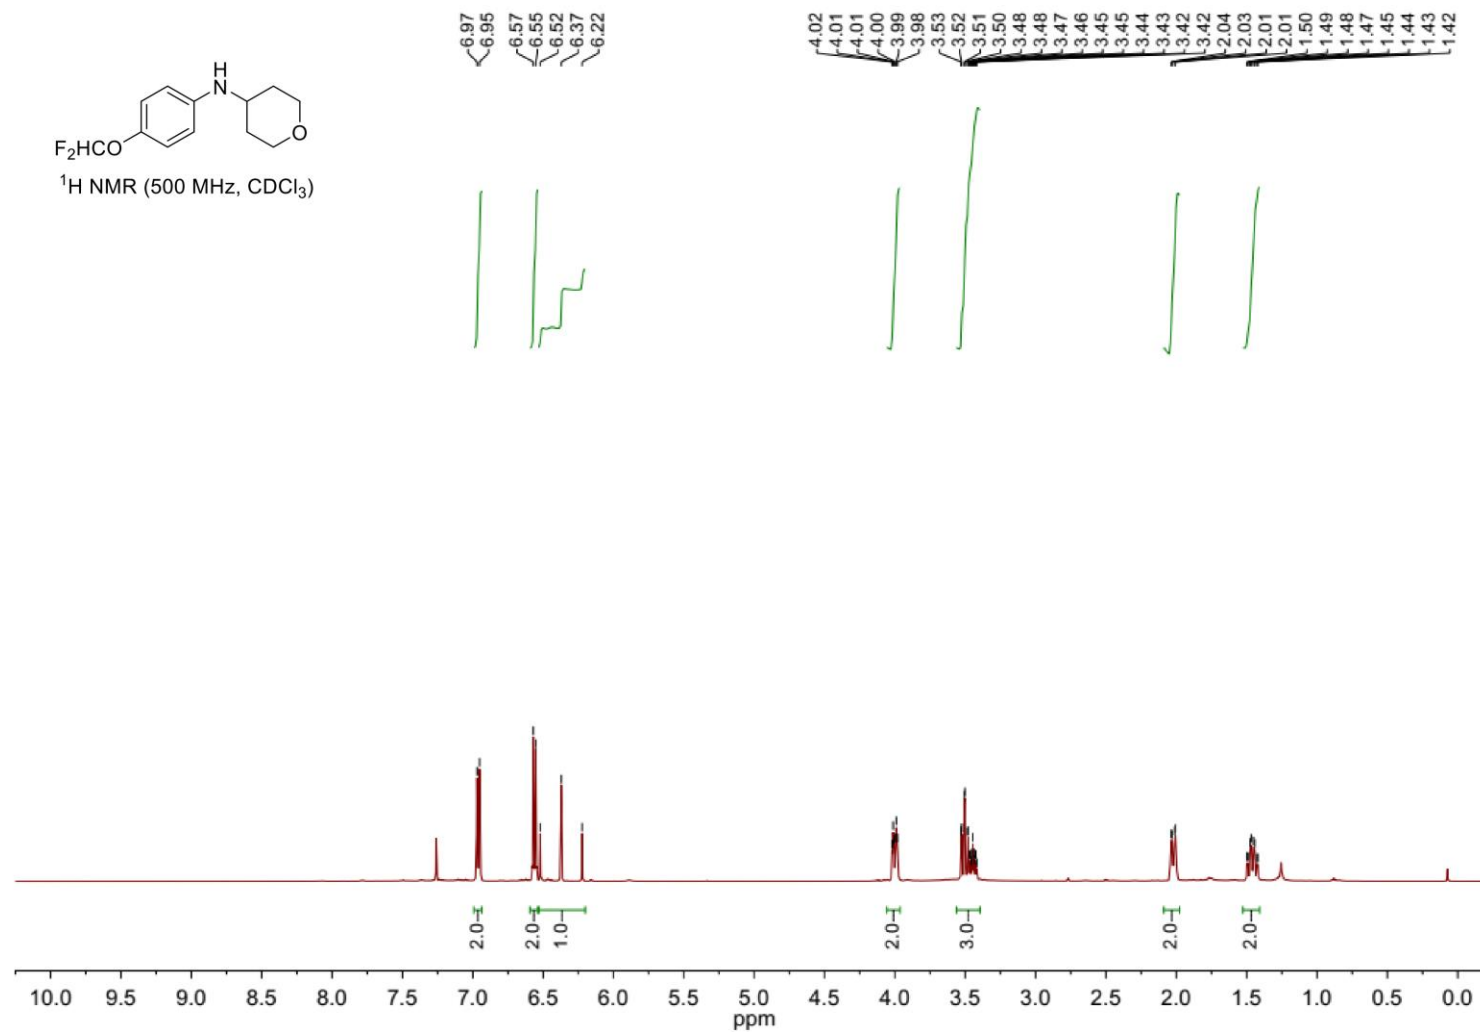

***N*-4-(Difluoromethoxy)phenyl)tetrahydro-2*H*-pyran-4-amine (19)**

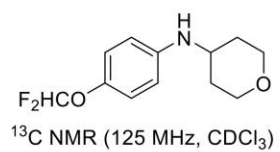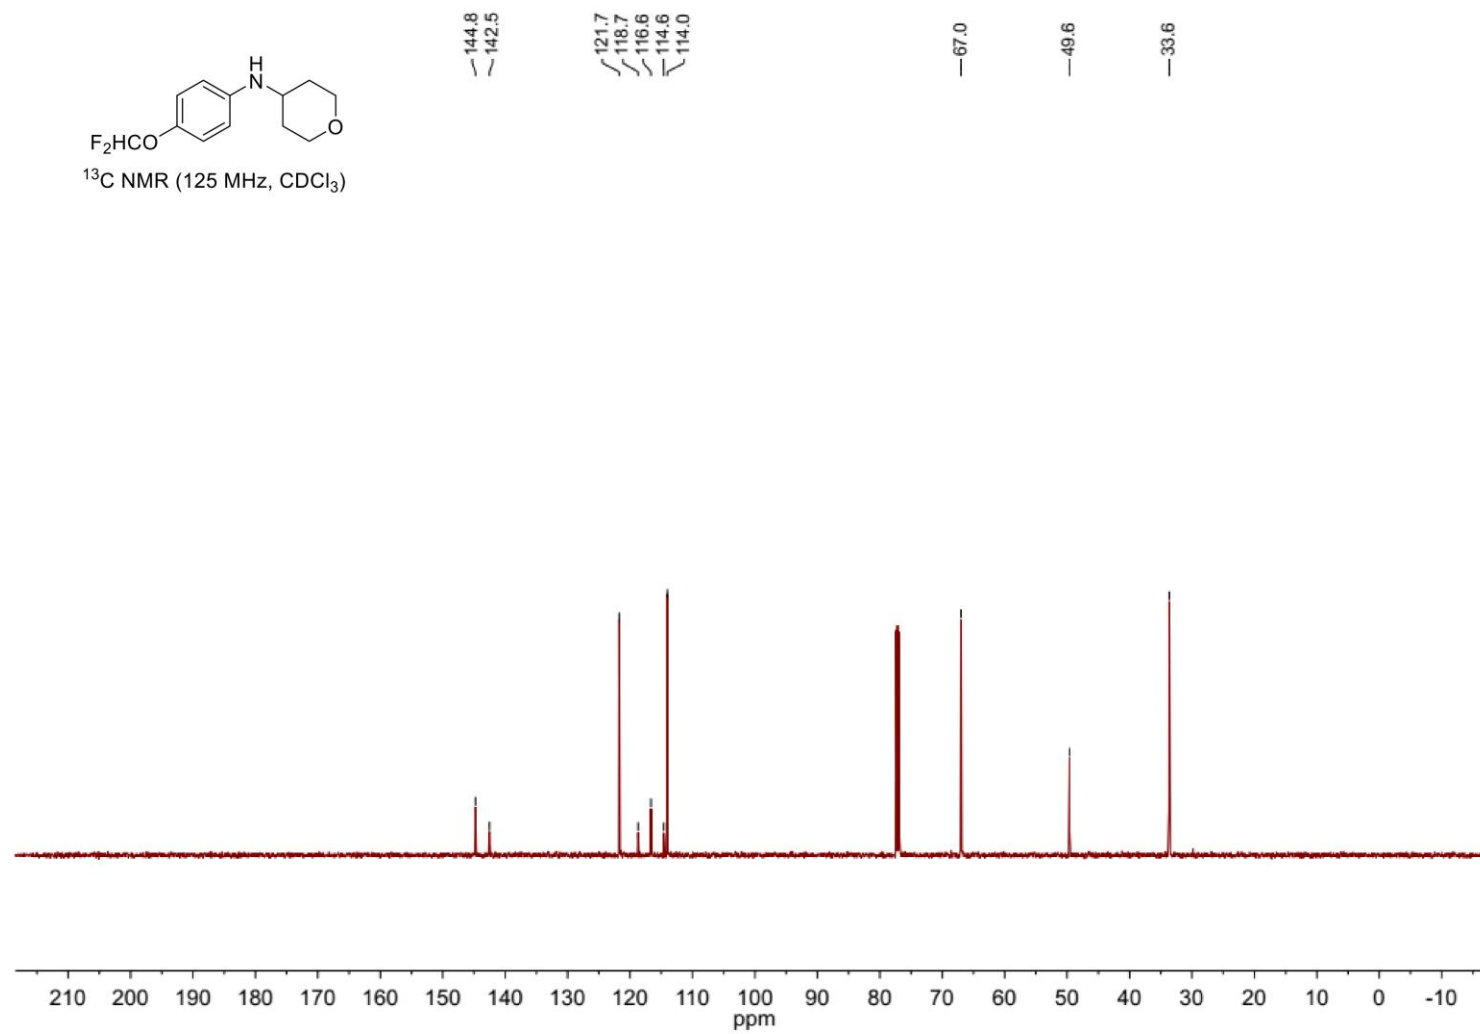

## N-Cyclohexylaniline (20)

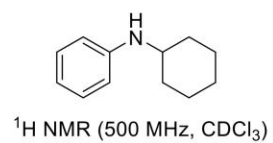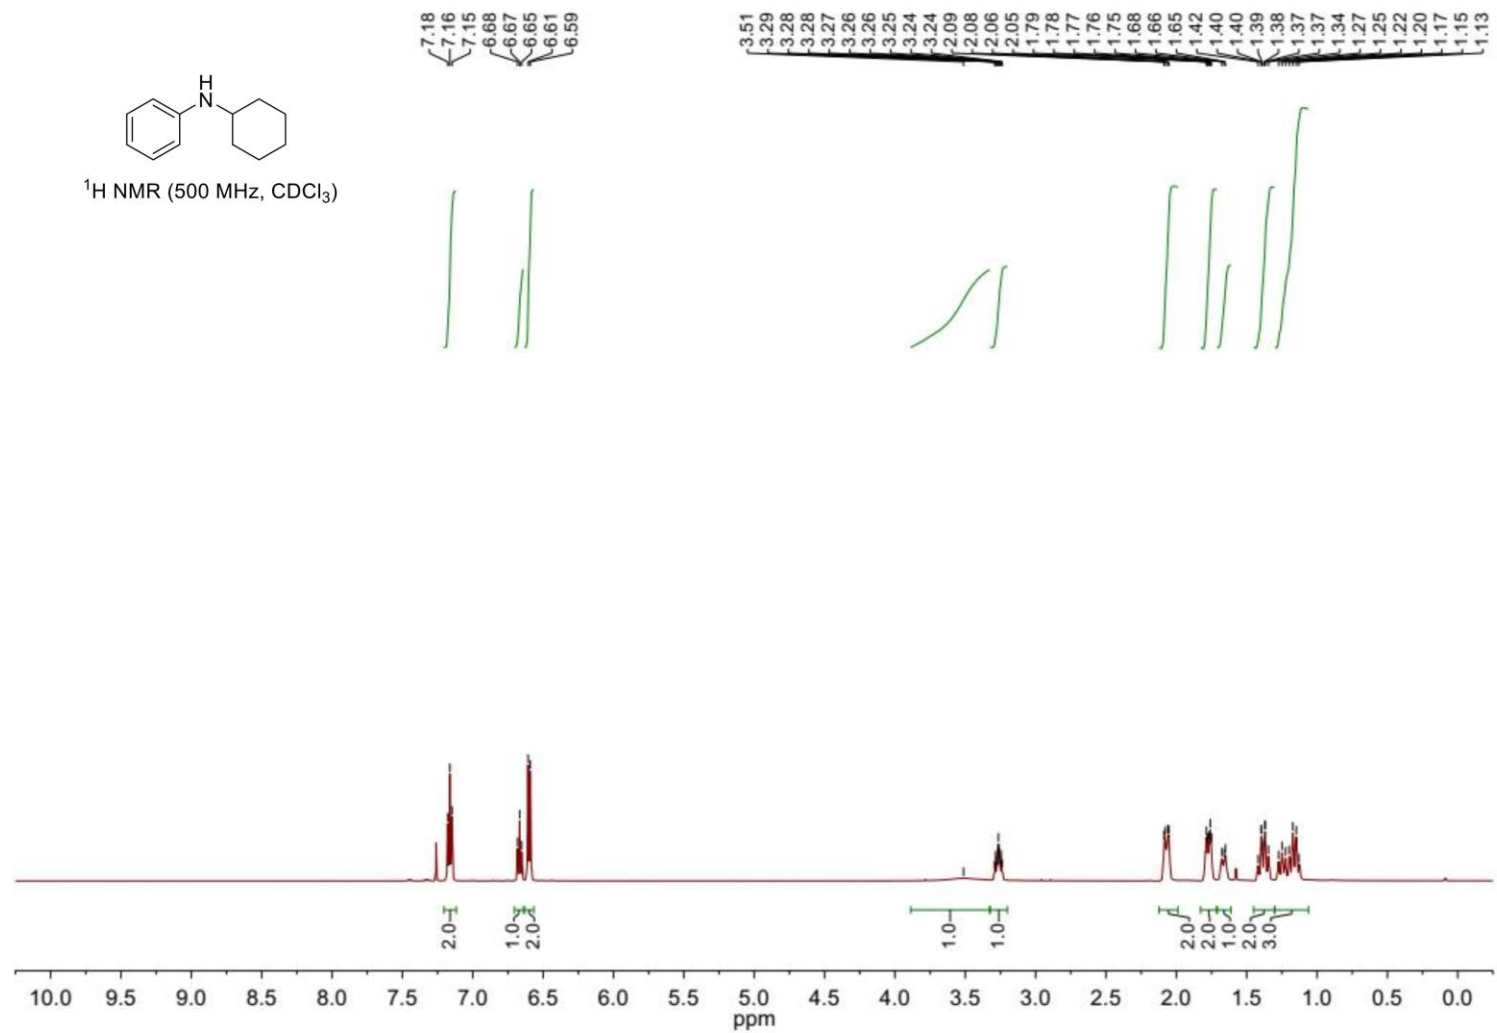

[Go back to table of contents](#)

## N-Cyclohexylaniline (20)

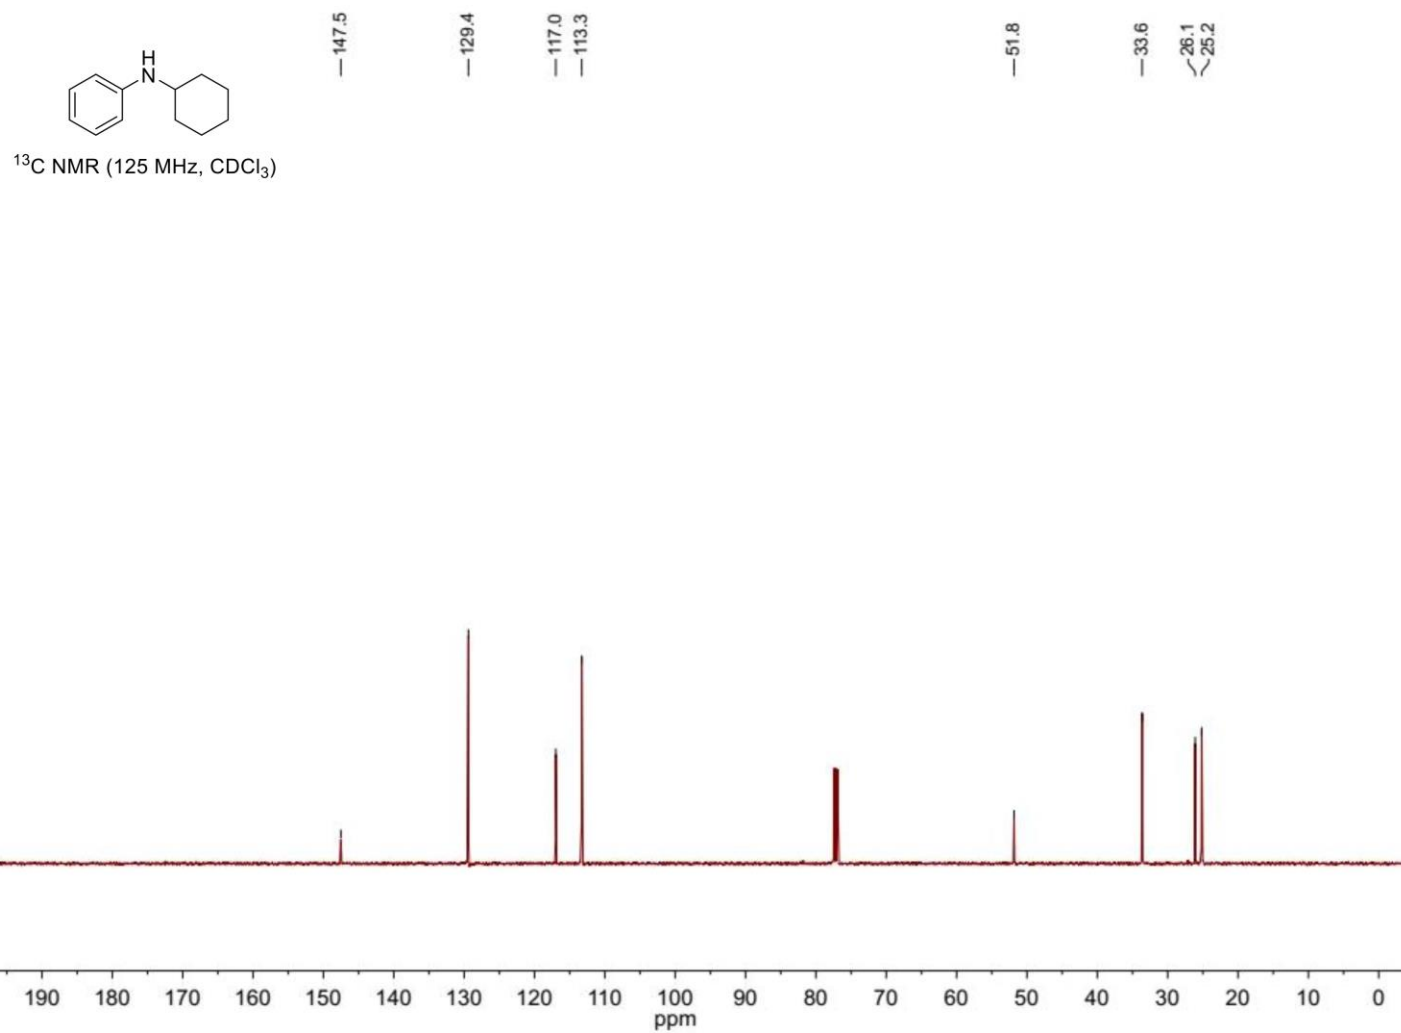

[Go back to table of contents](#)



### *N*-(*p*-Tolyl)tetrahydro-2*H*-pyran-4-amine (21)

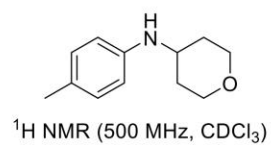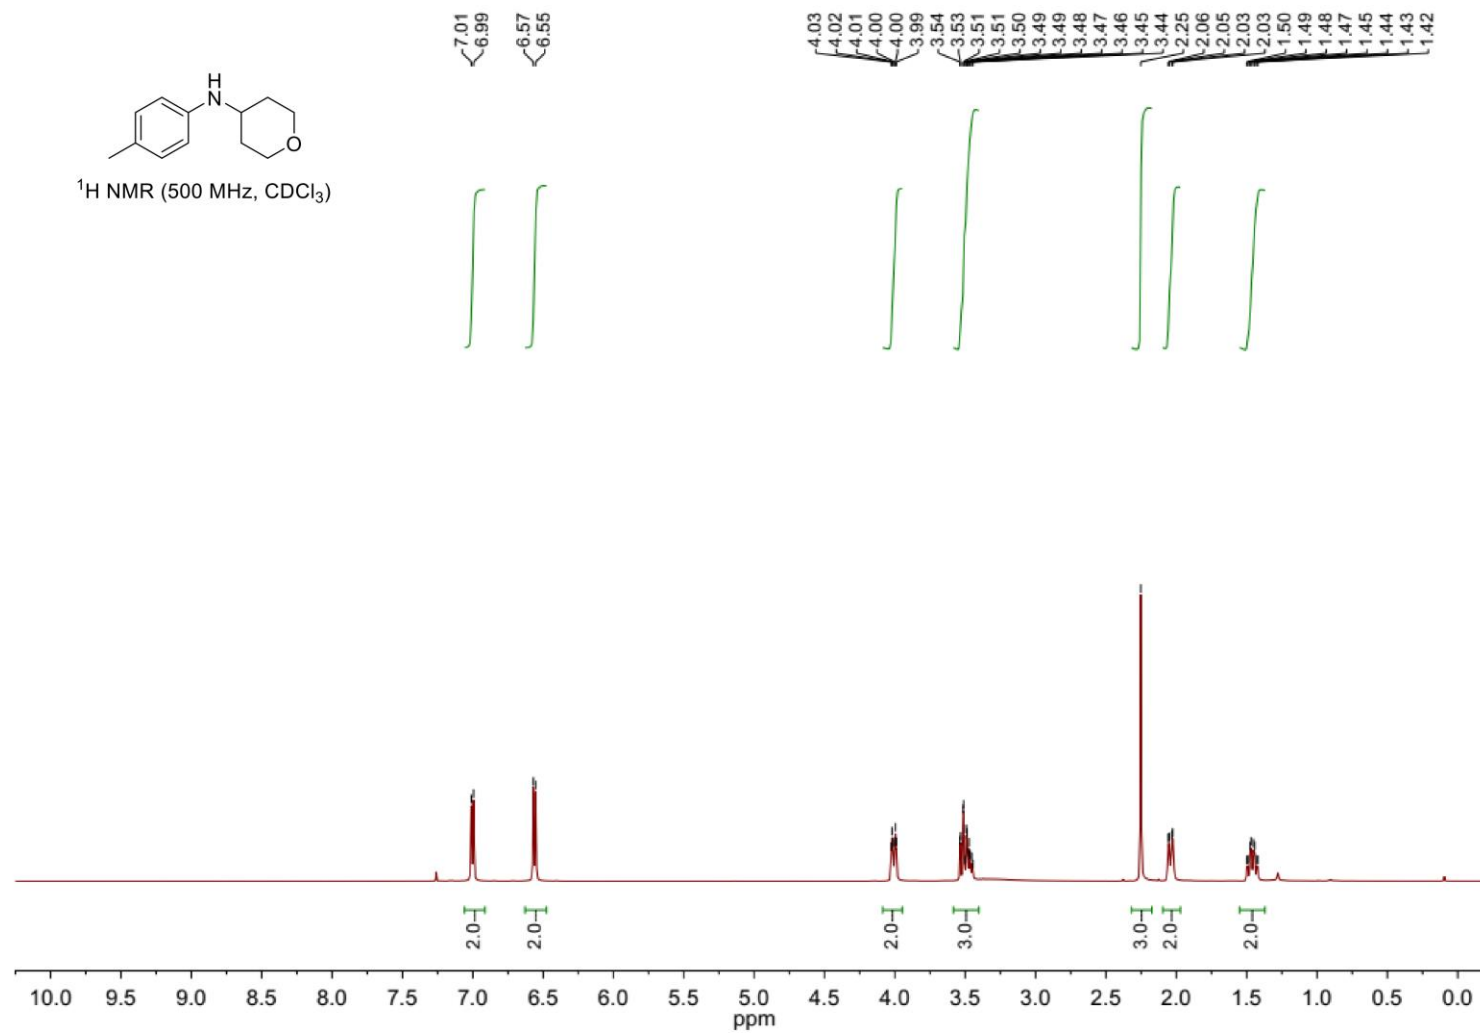

***N*-(*p*-Tolyl)tetrahydro-2*H*-pyran-4-amine (21)**

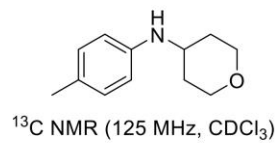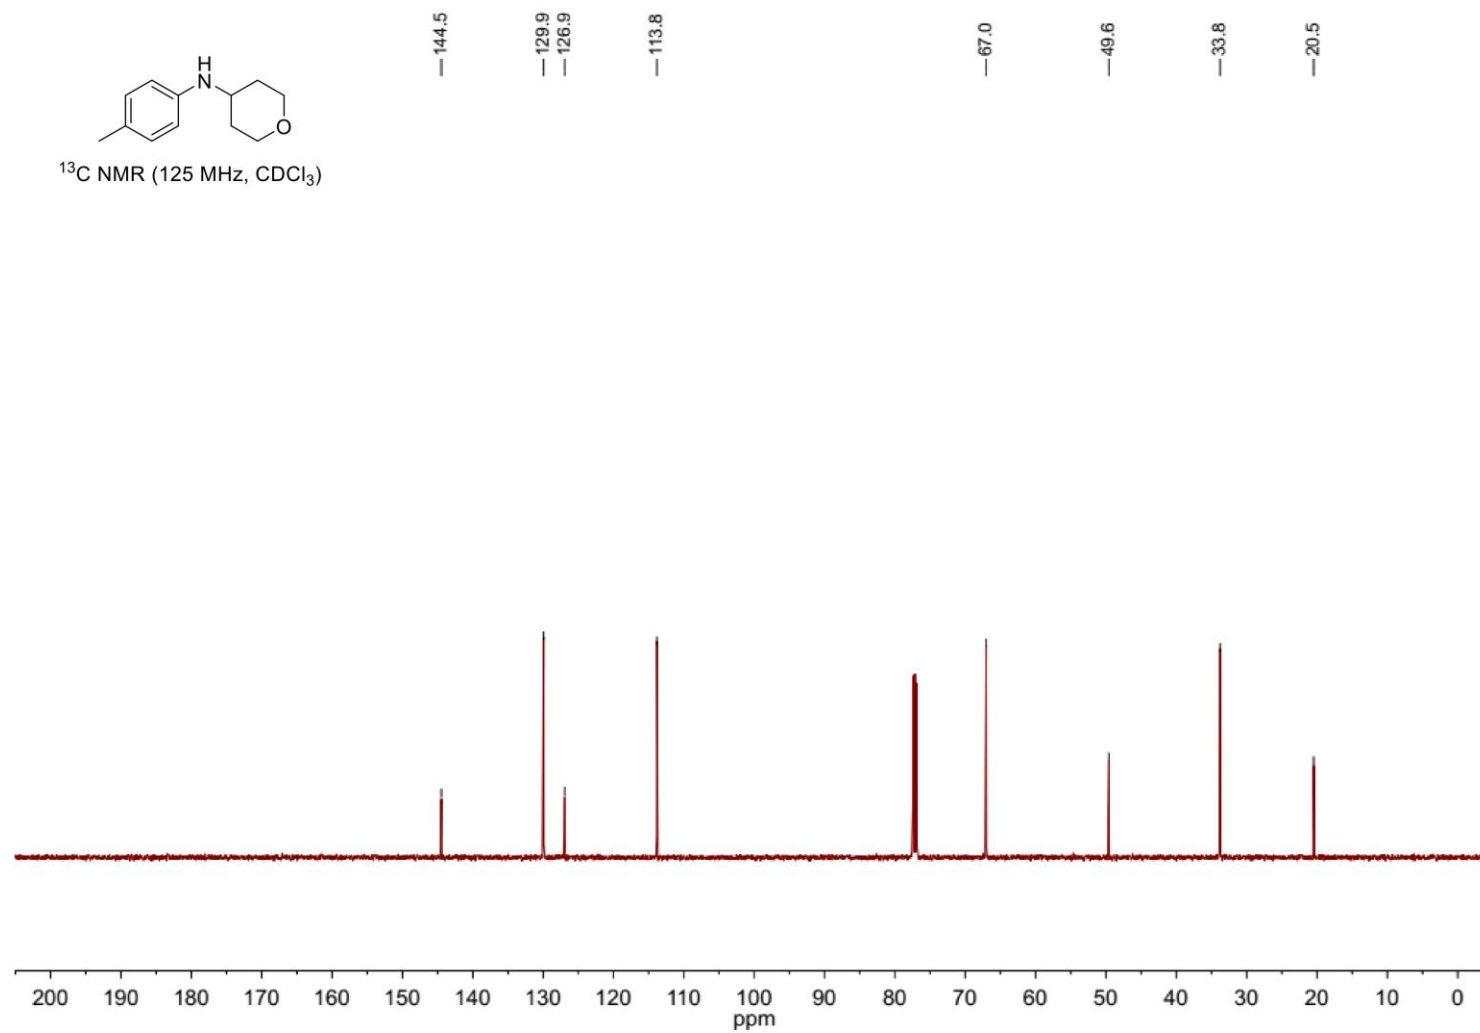

## N-Cyclohexyl-4-fluoroaniline (22)

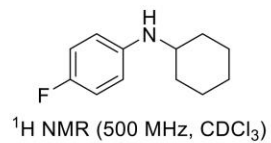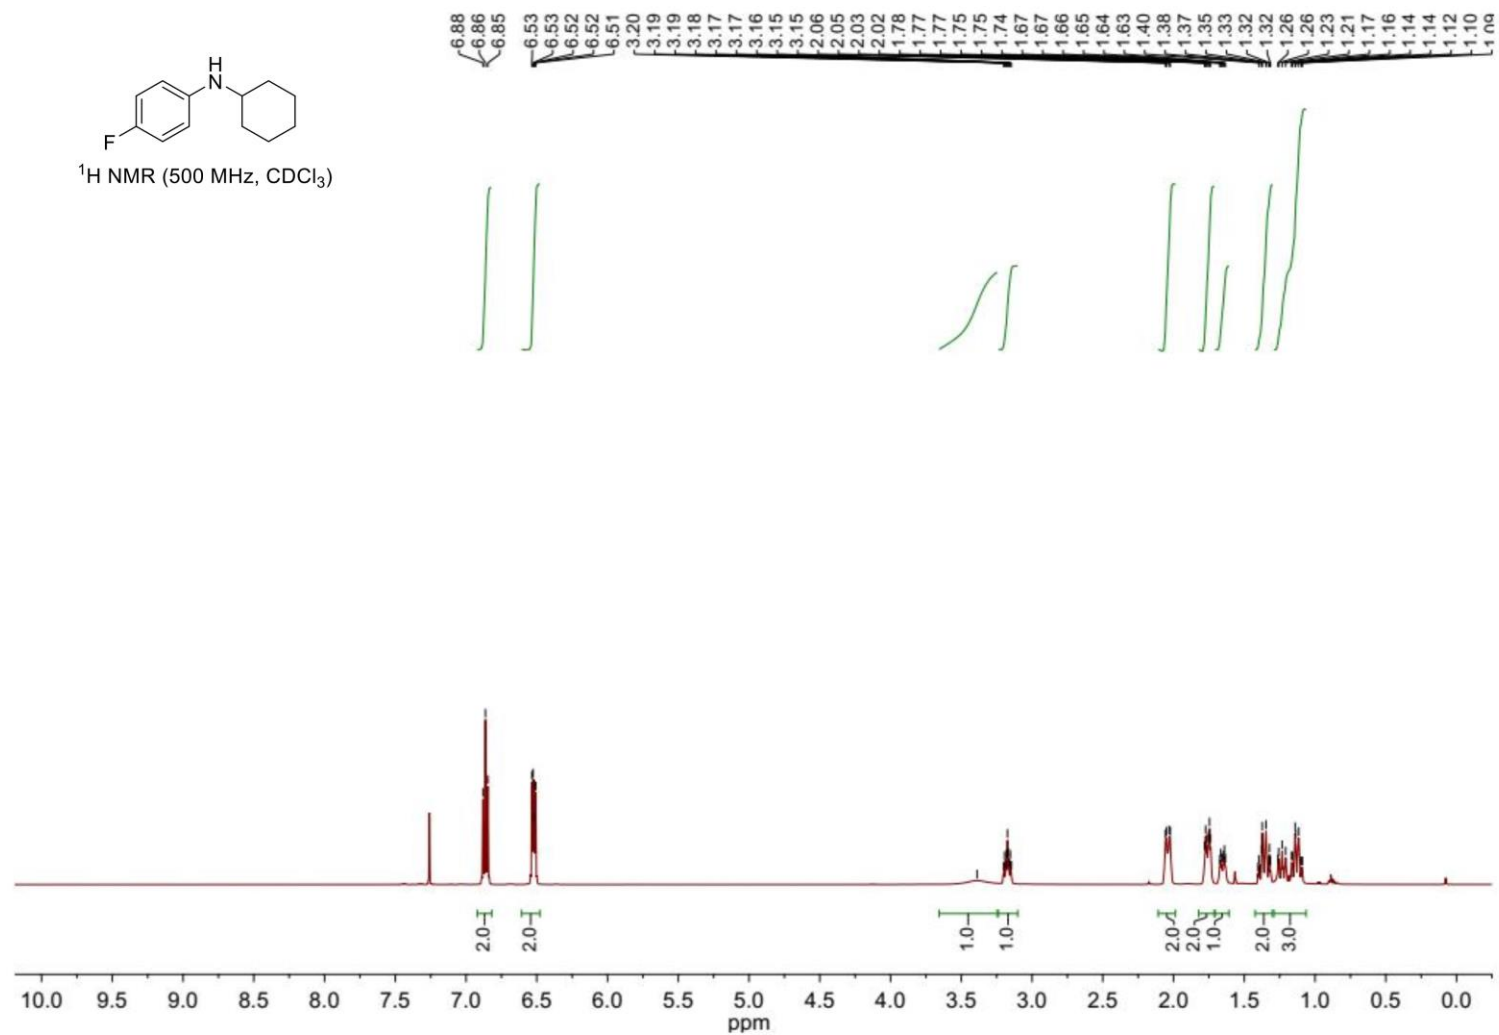

## N-Cyclohexyl-4-fluoroaniline (22)

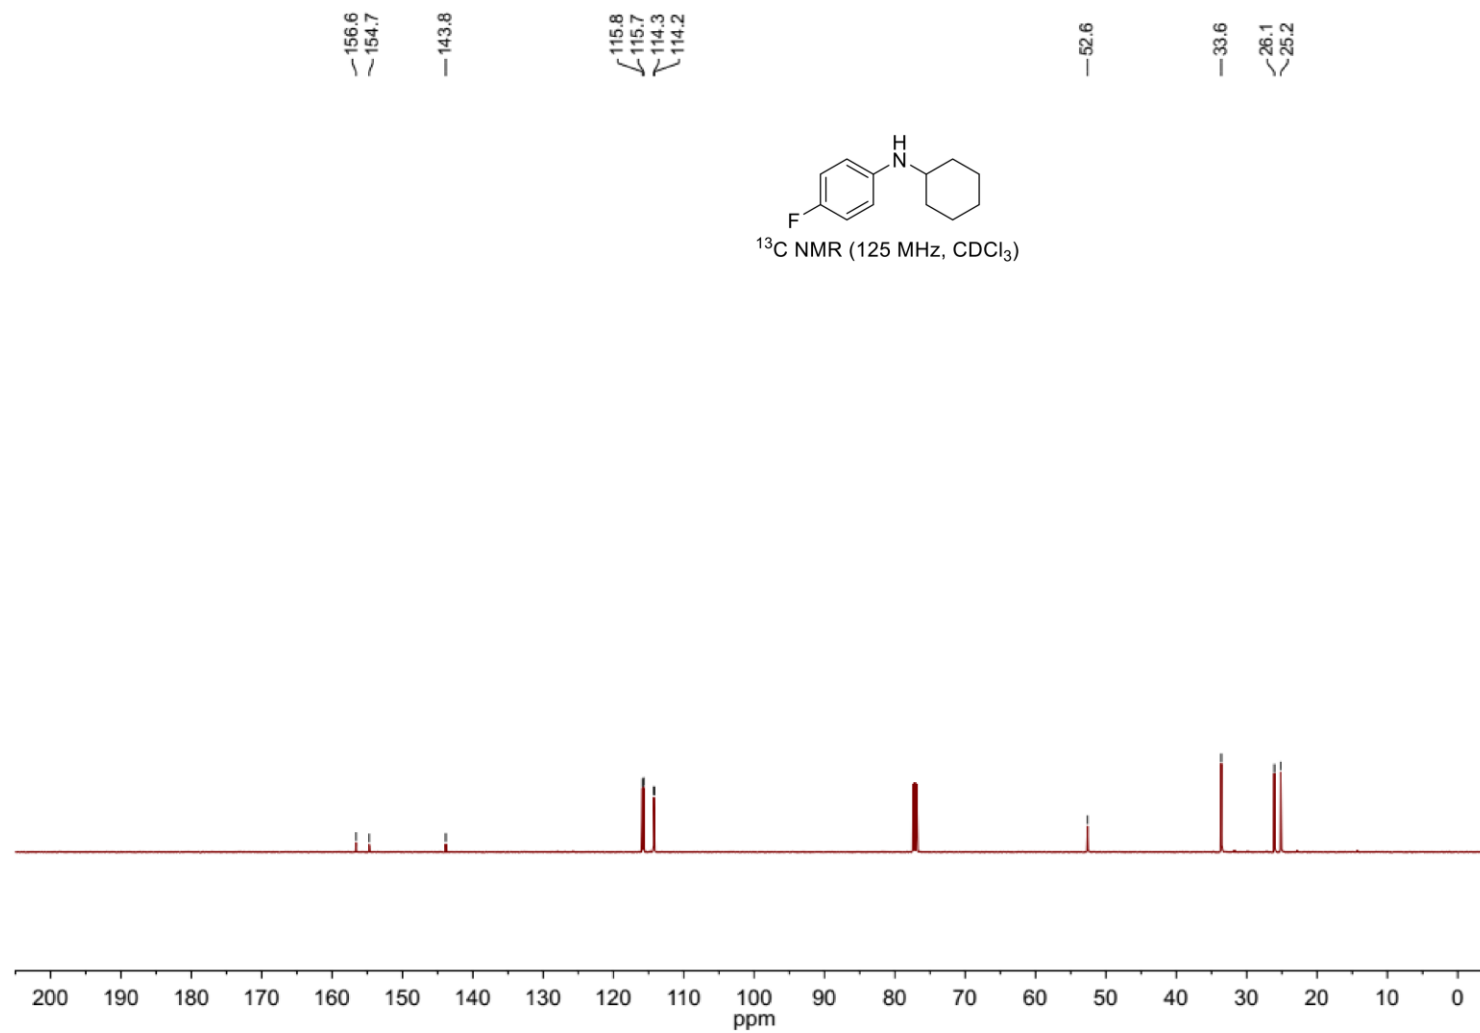

[Go back to table of contents](#)

### 4-Chloro-N-cyclohexylaniline (23)

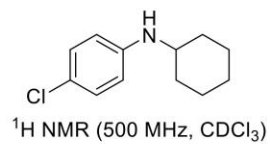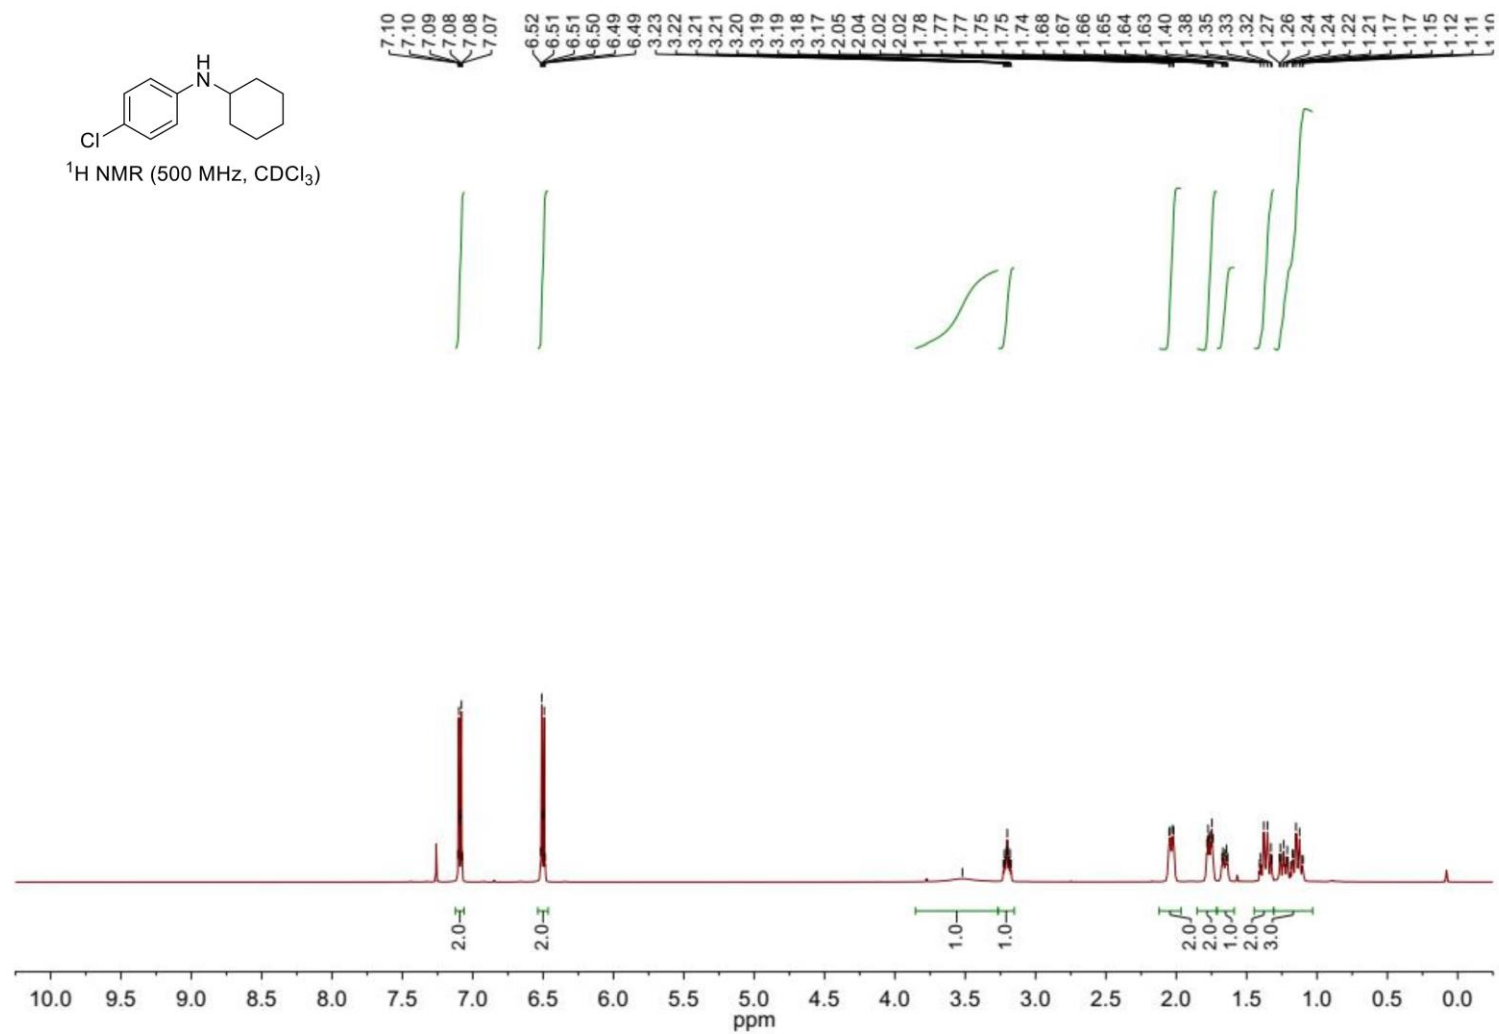

### 4-Chloro-*N*-cyclohexylaniline (23)

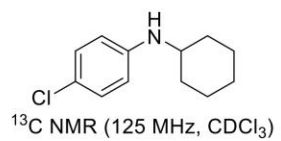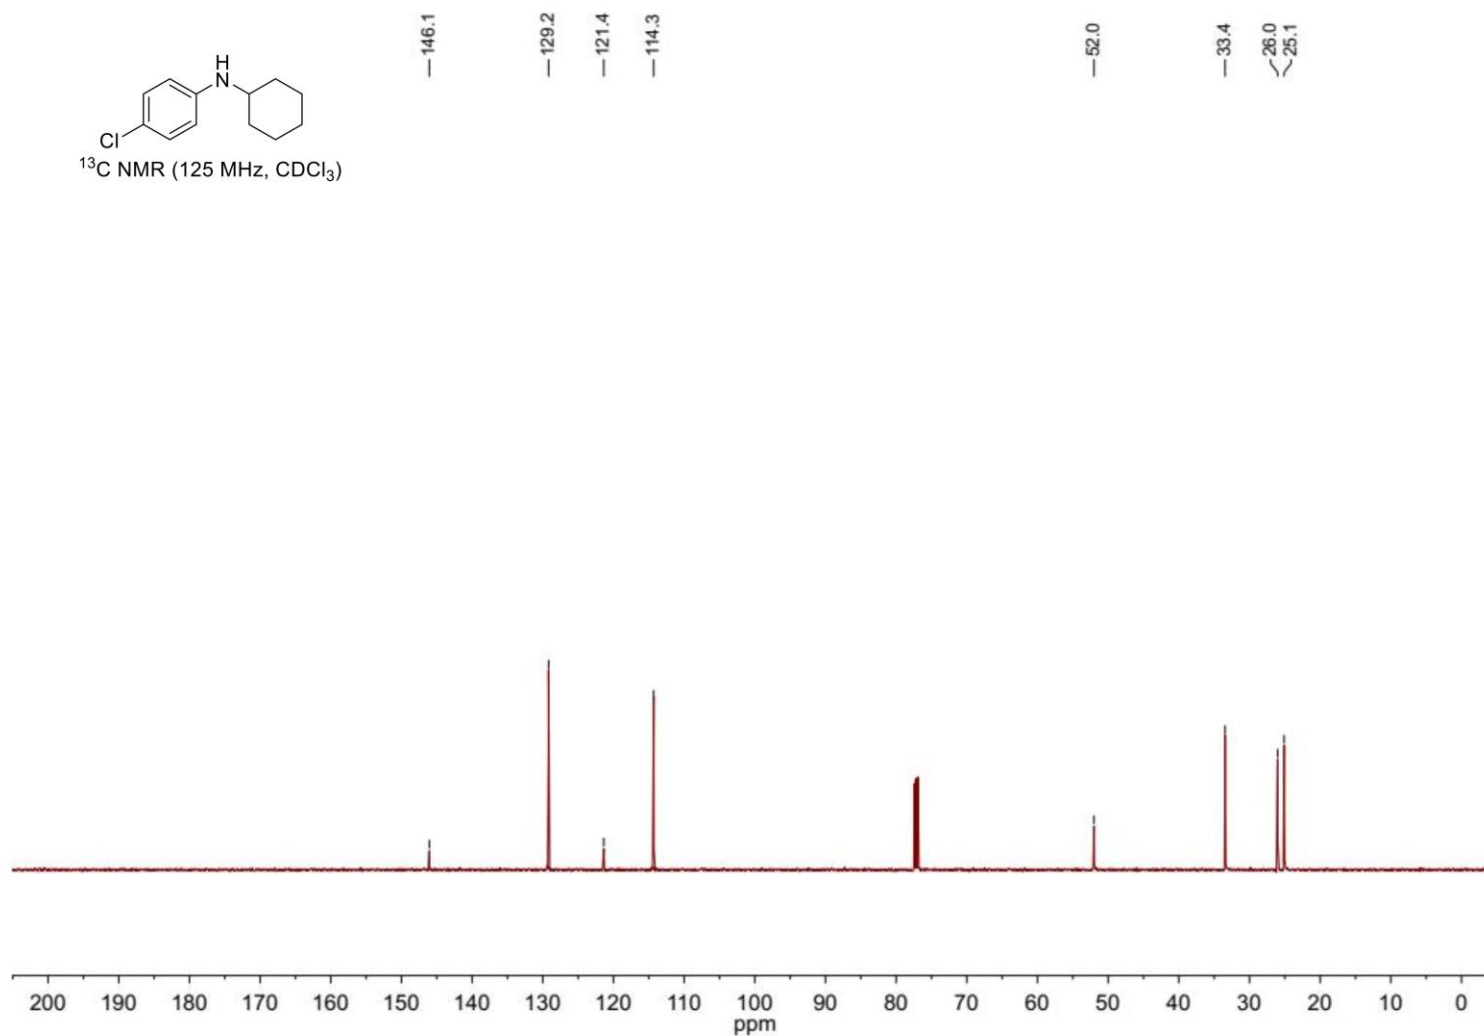

### 4-Bromo-N-cyclohexylaniline (24)

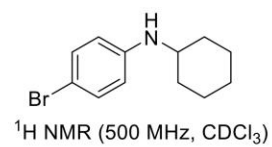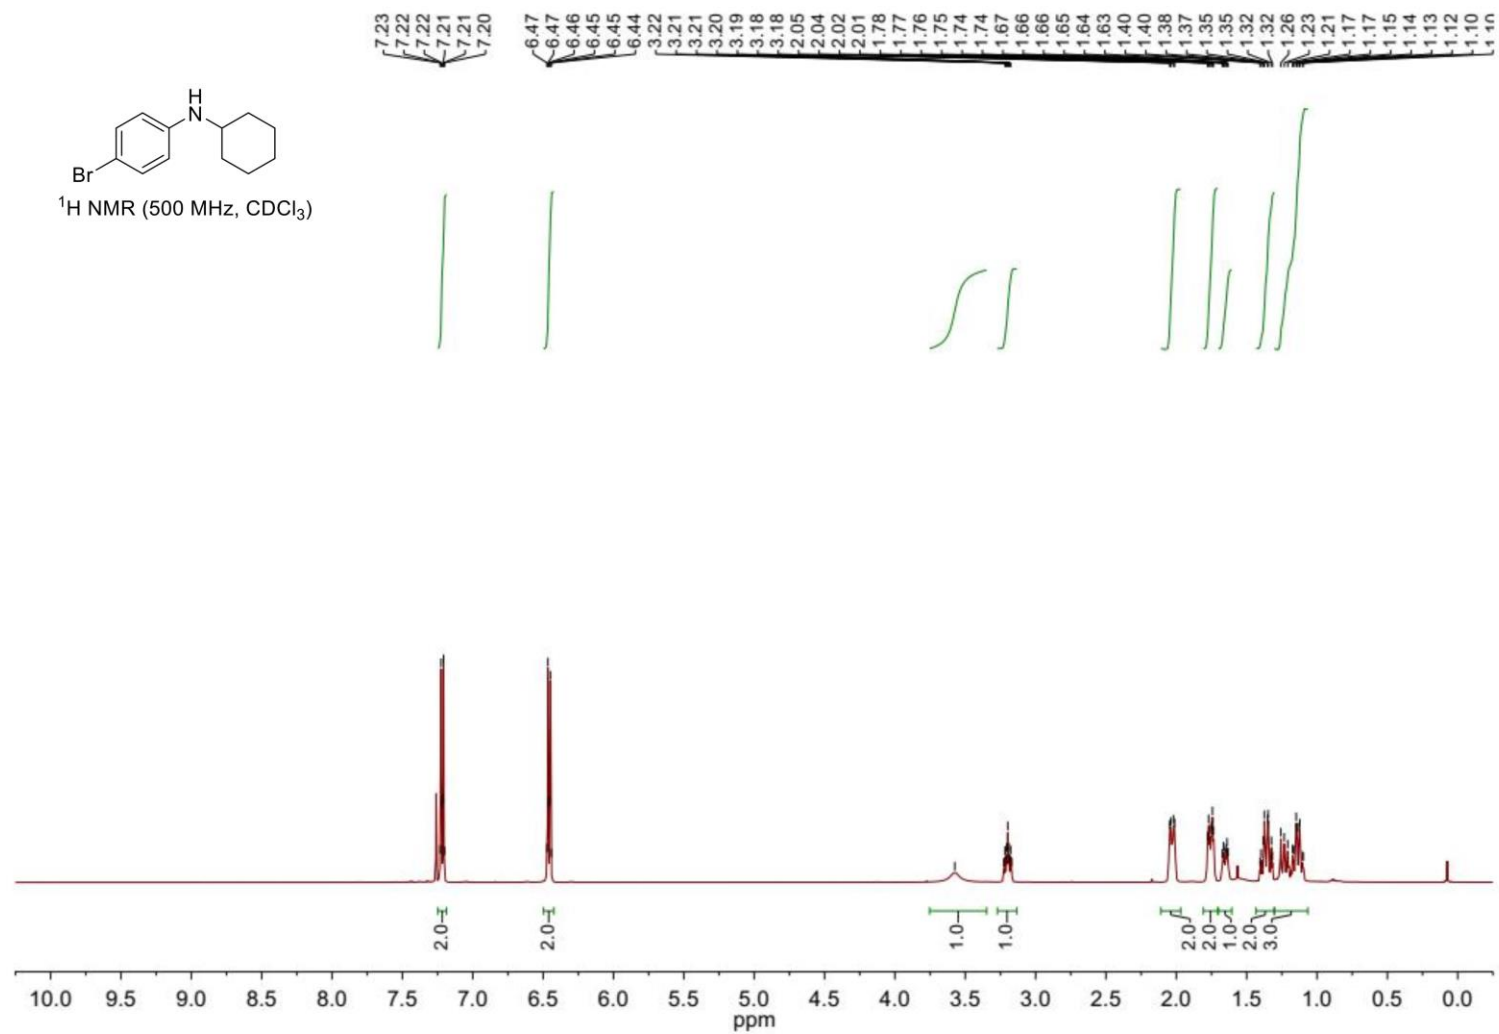

### 4-Bromo-N-cyclohexylaniline (24)

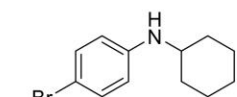

$^{13}\text{C}$  NMR (125 MHz,  $\text{CDCl}_3$ )

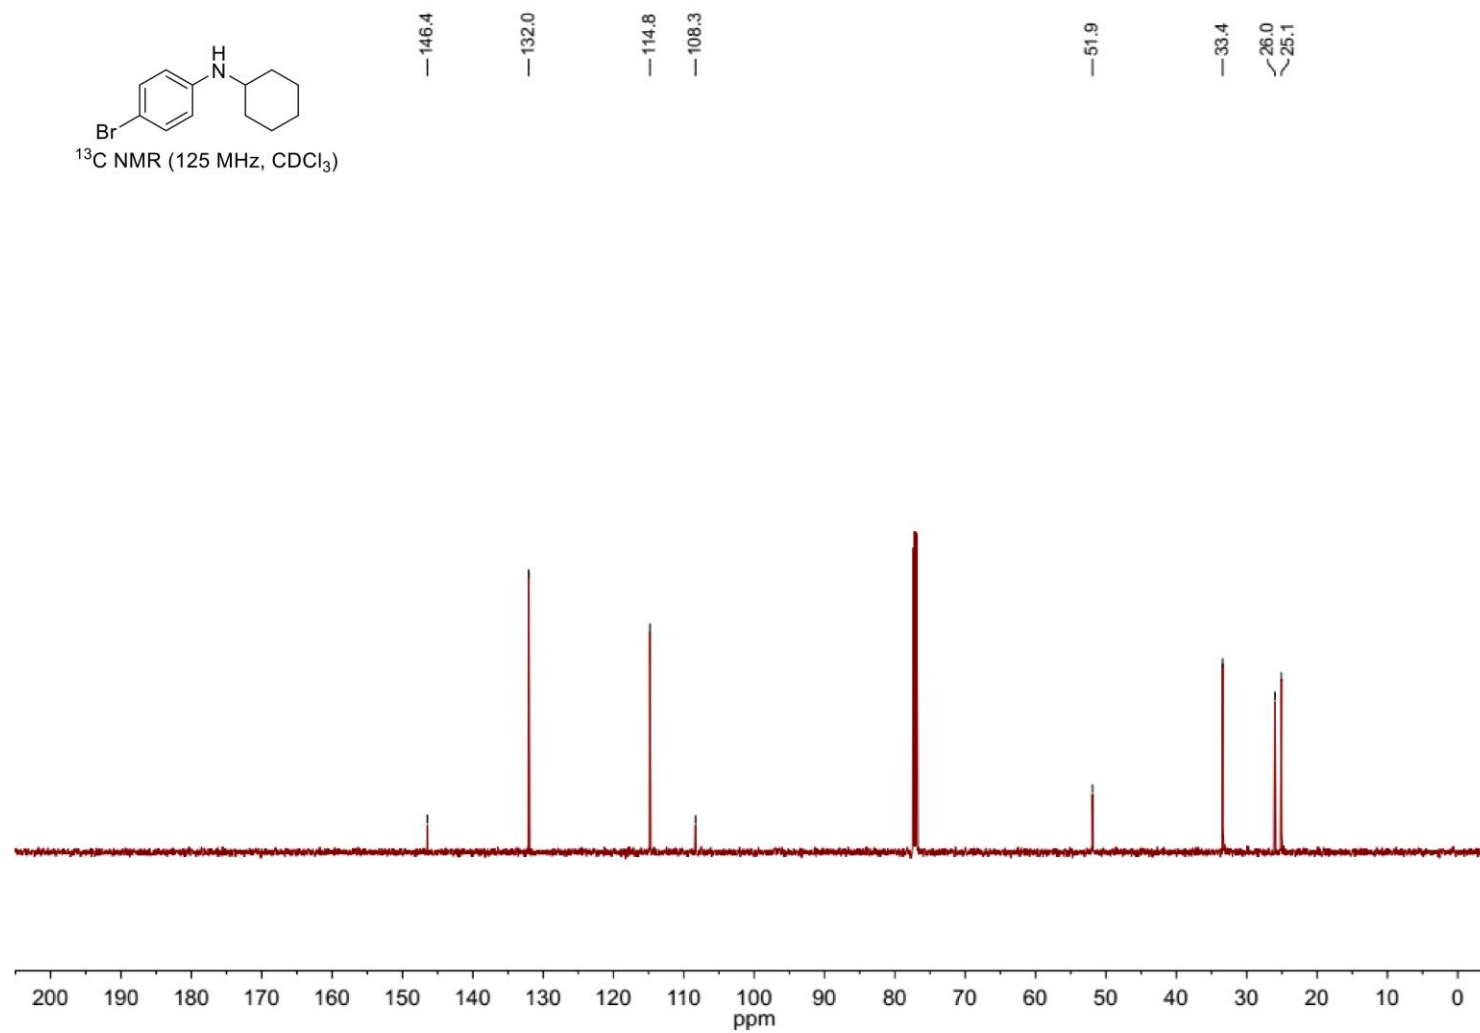

[Go back to table of contents](#)



### Methyl (1*S*\*,2*S*\*)-2-(phenylamino)cyclohexane-1-carboxylate (25)

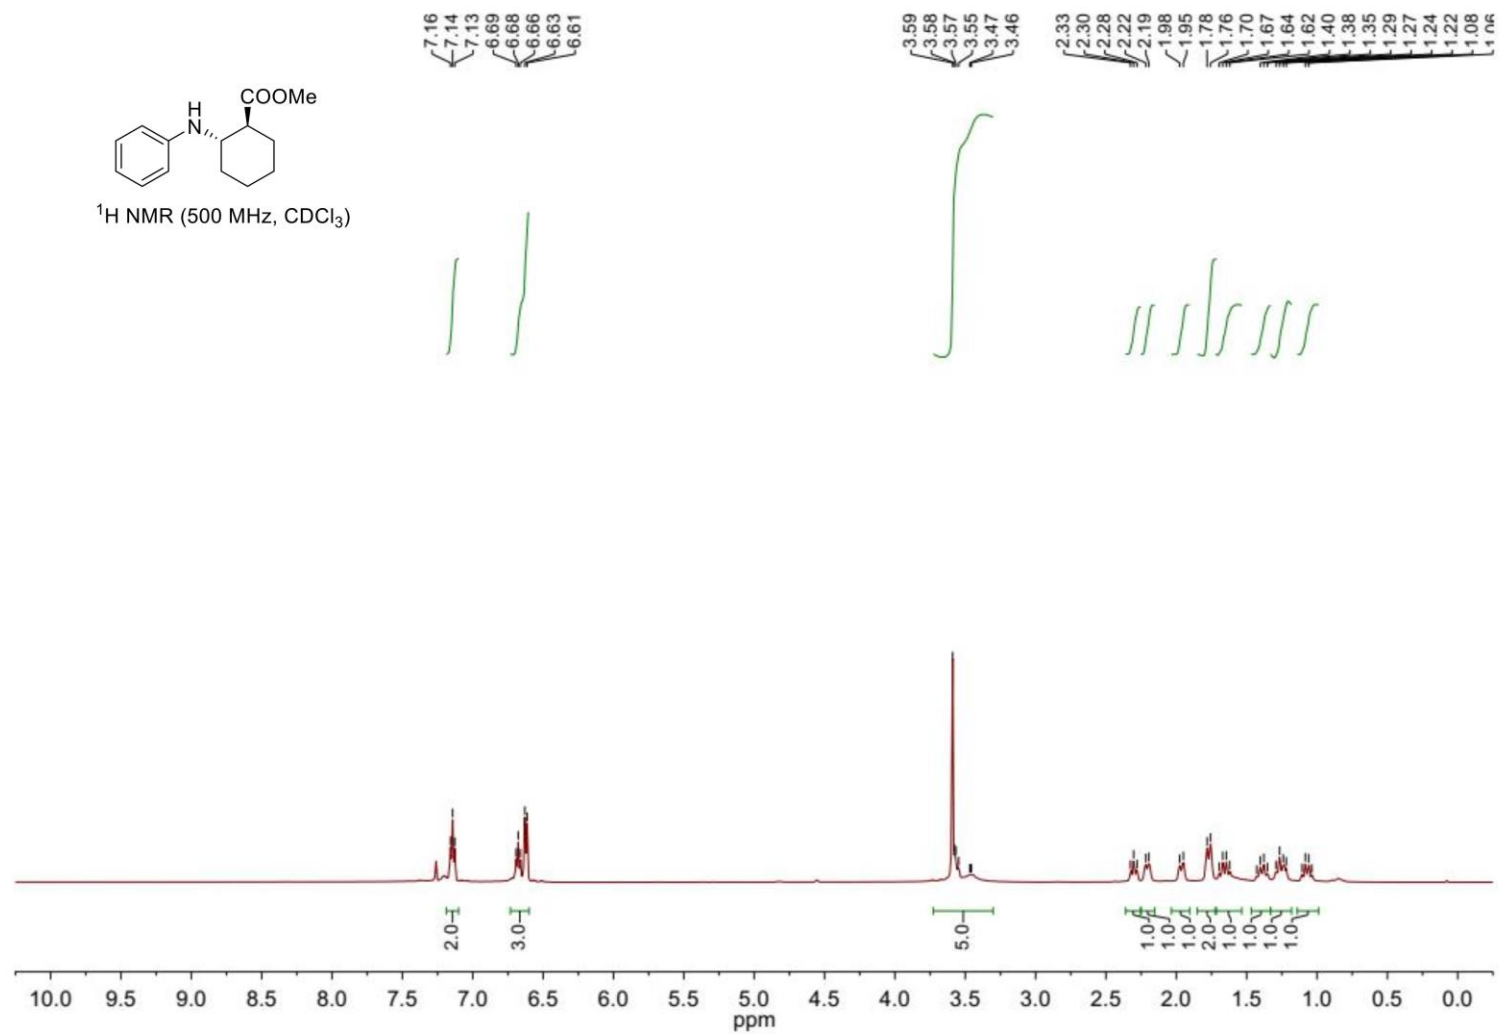

Methyl (1*S*\*,2*S*\*)-2-(phenylamino)cyclohexane-1-carboxylate (25)

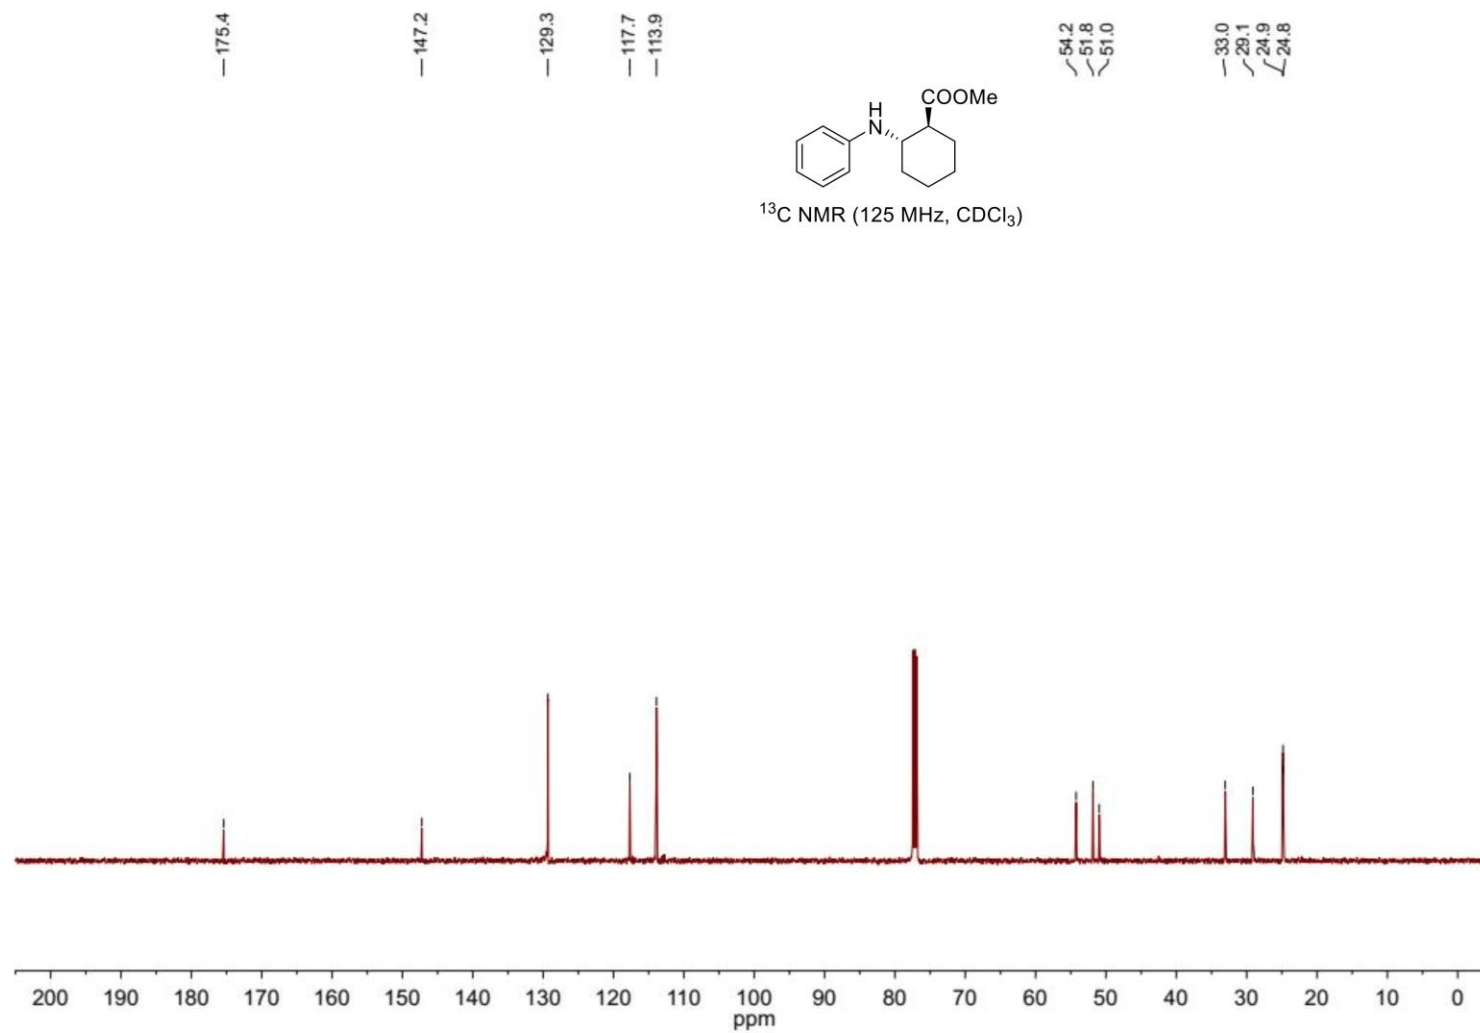

[Go back to table of contents](#)

### Methyl (1*S*\*,2*S*\*)-2-((3-isopropylphenyl)amino)cyclohexane-1-carboxylate (26)

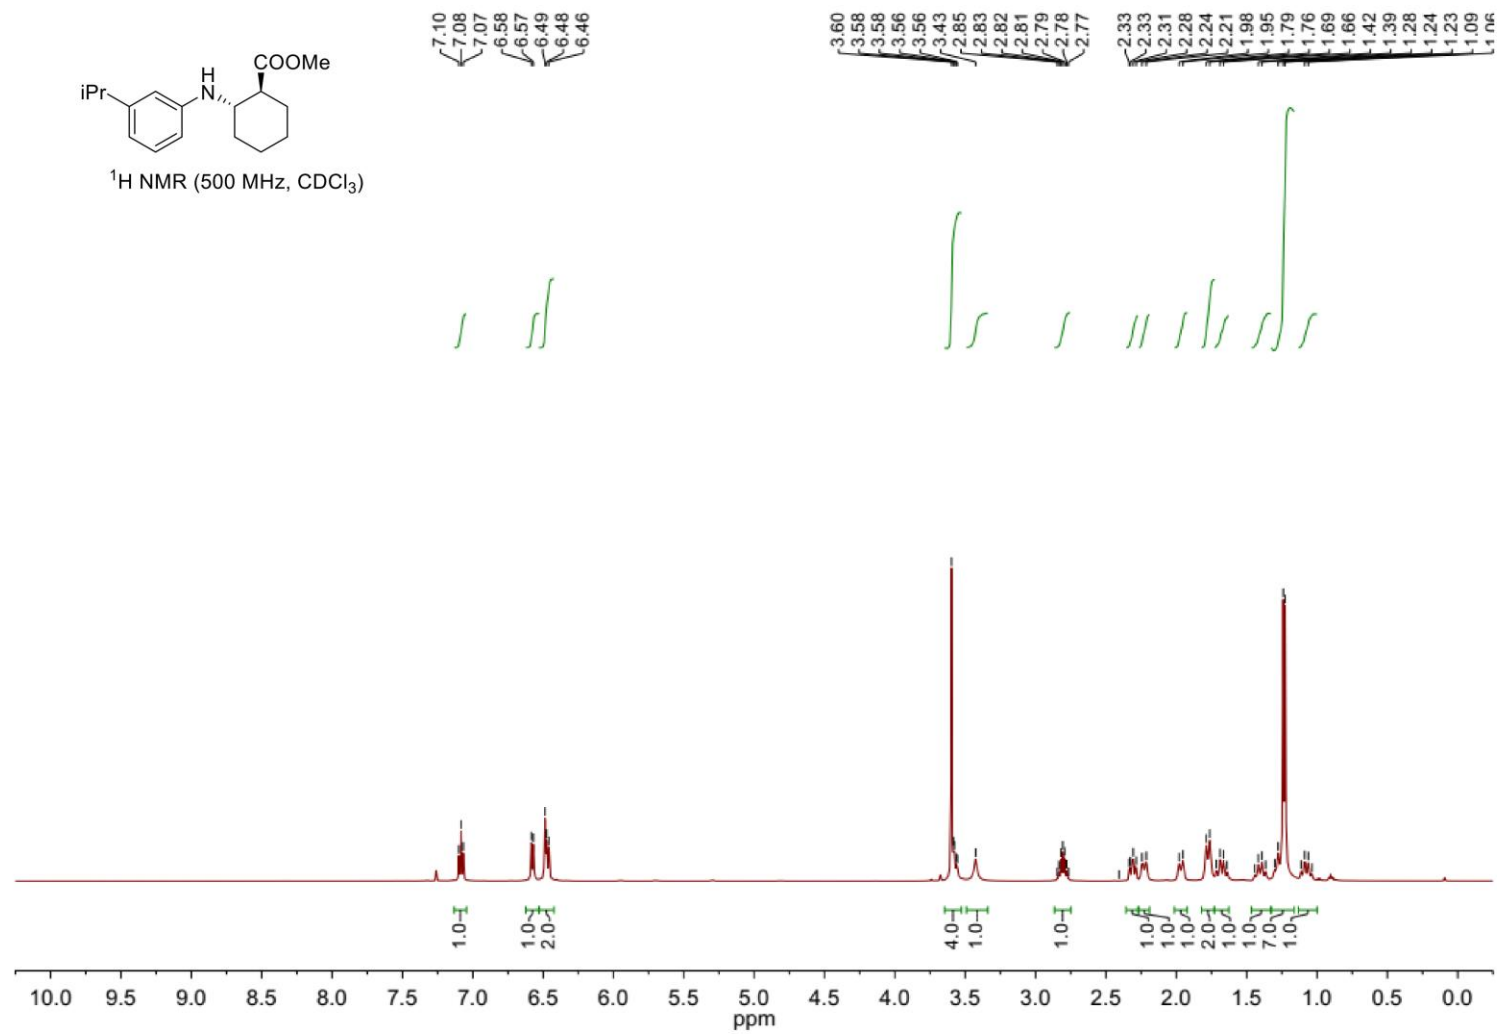

Methyl (1*S*\*,2*S*\*)-2-((3-isopropylphenyl)amino)cyclohexane-1-carboxylate (26)

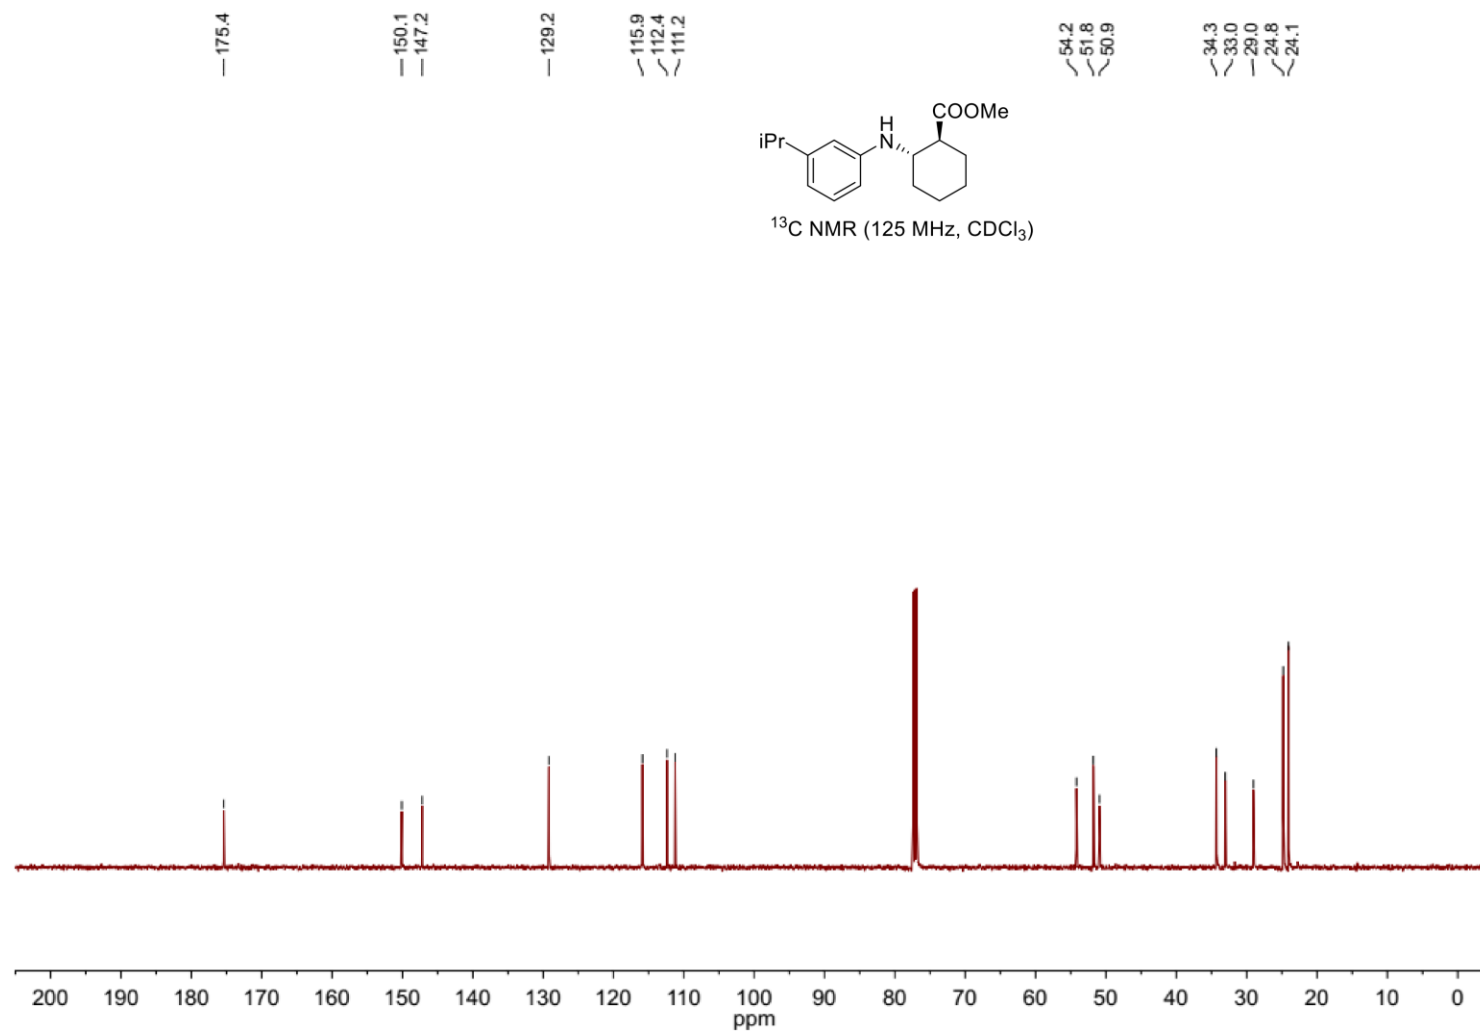

### N-Cyclohexyl-3-(methylsulfonyl)aniline (27)

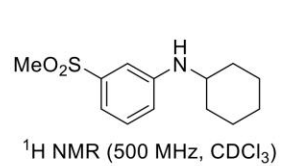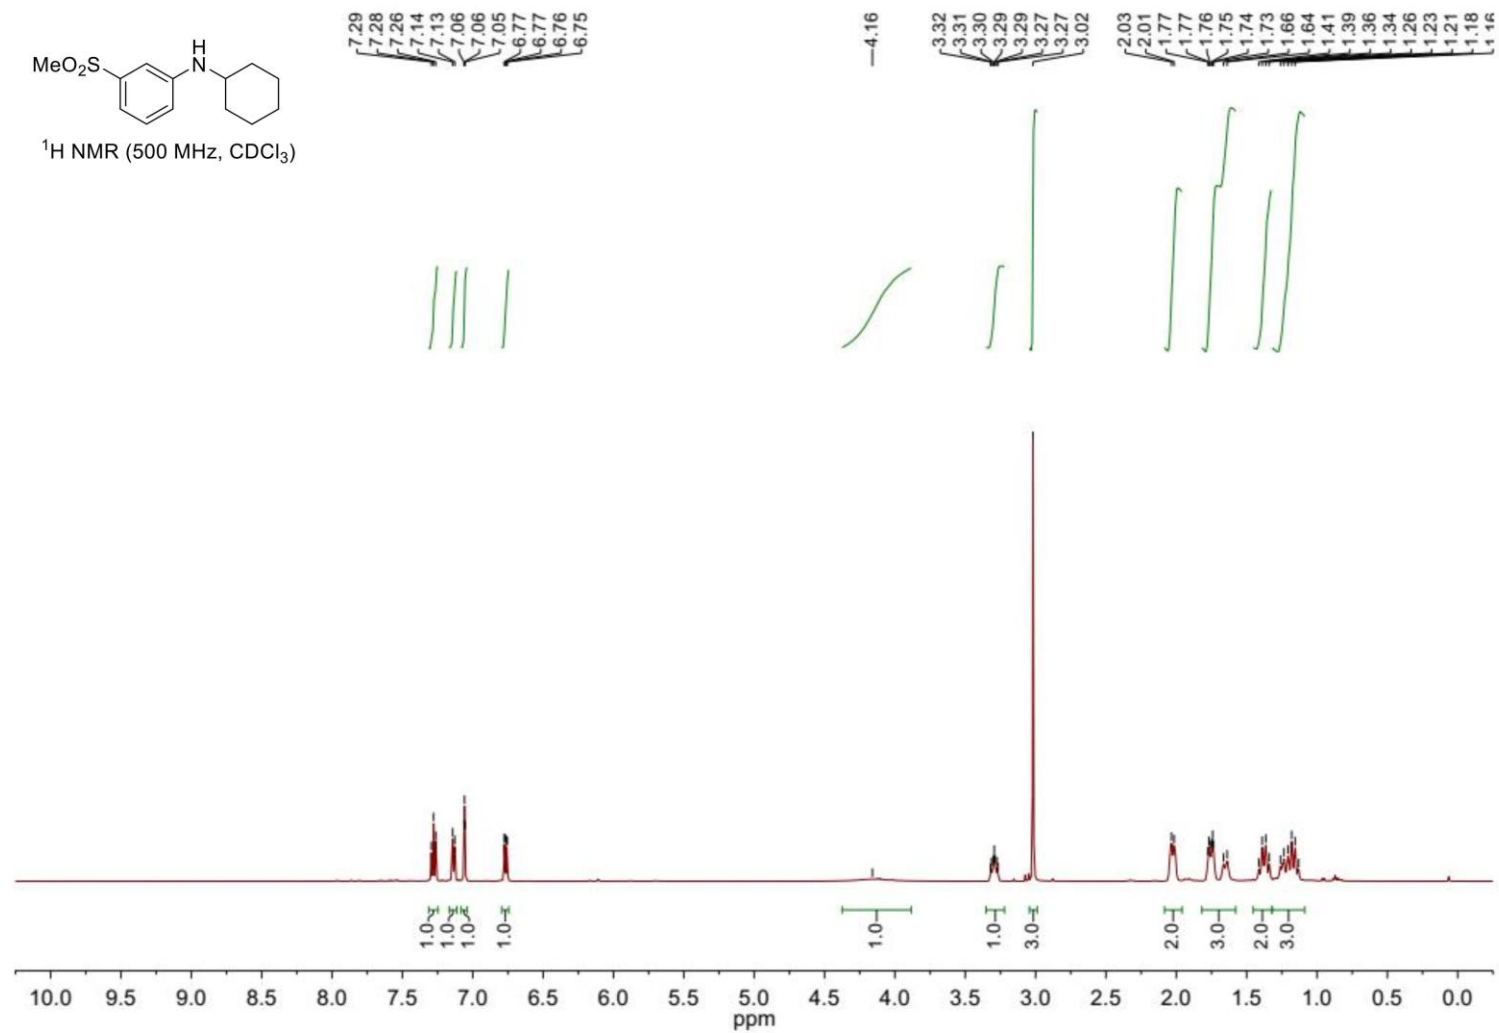

### N-Cyclohexyl-3-(methylsulfonyl)aniline (27)

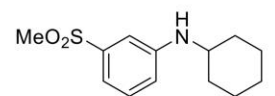

$^{13}\text{C}$  NMR (125 MHz,  $\text{CDCl}_3$ )

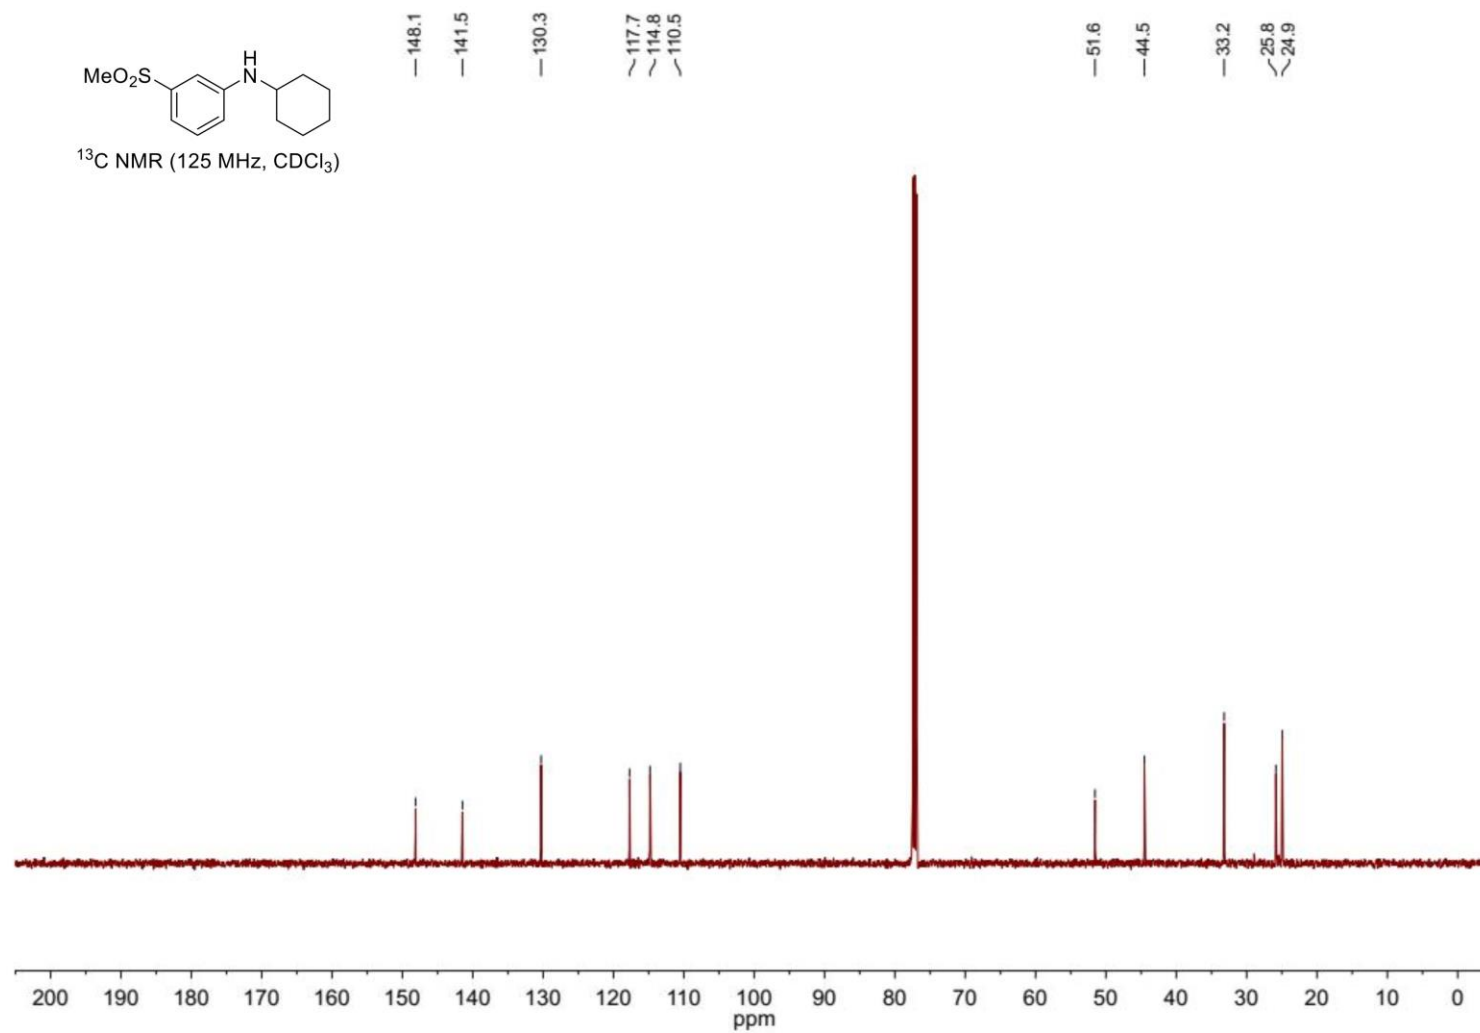

[Go back to table of contents](#)

### N-Isopropyl-3,4,5-trimethylaniline (28)

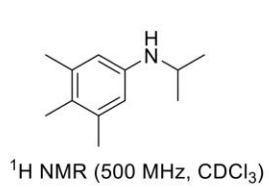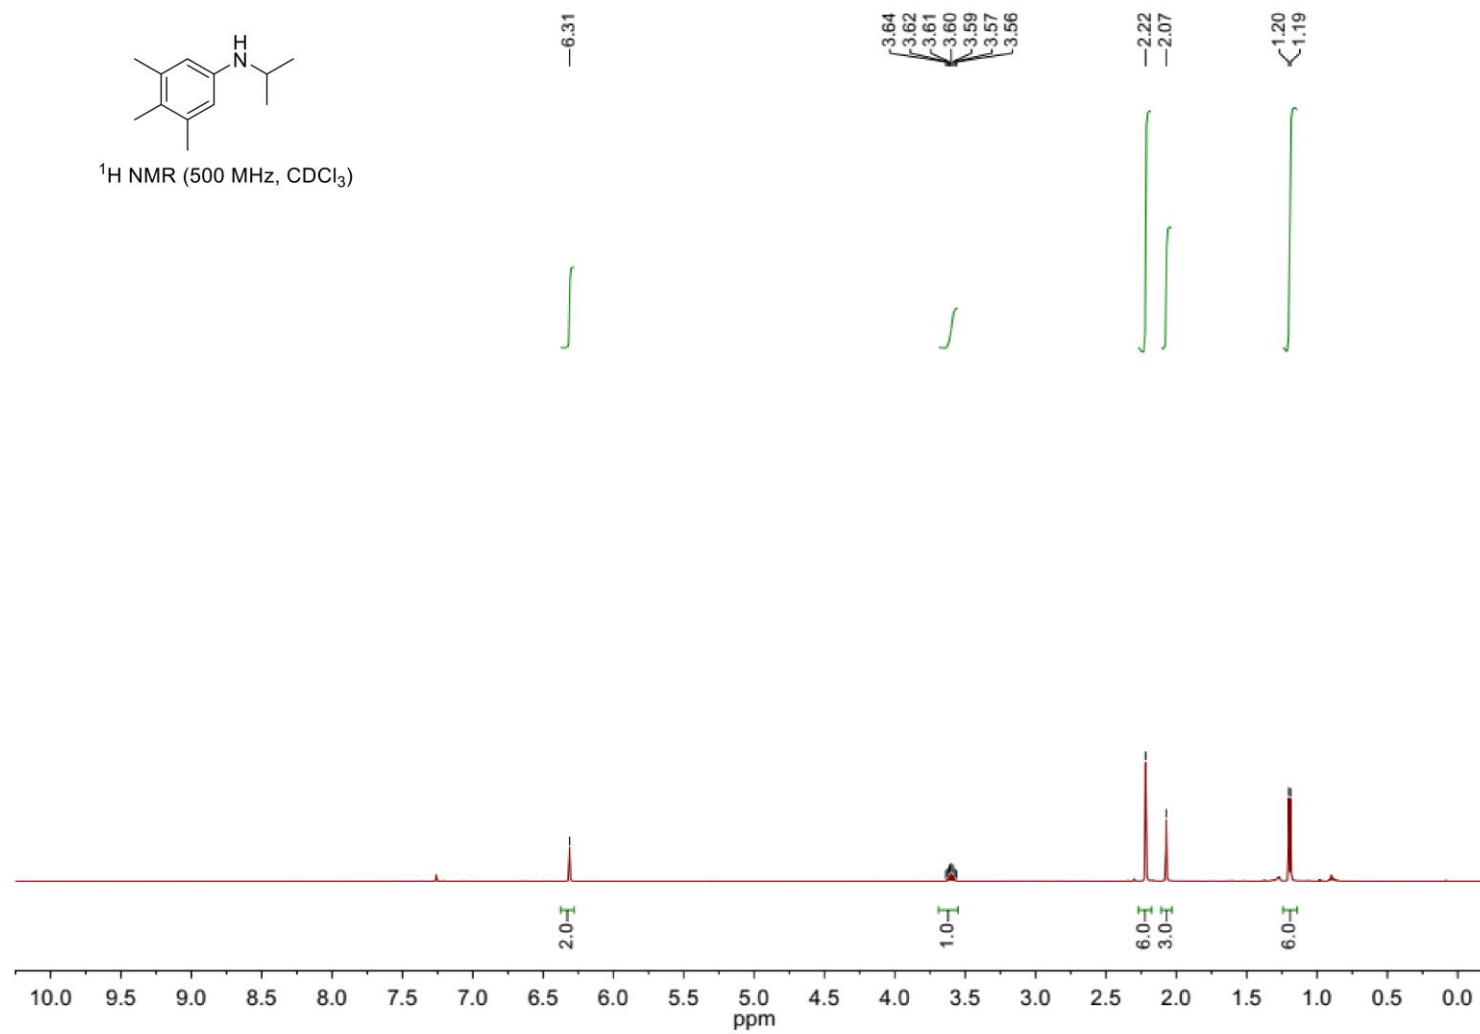

### N-Isopropyl-3,4,5-trimethylaniline (28)

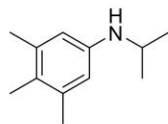

$^{13}\text{C}$  NMR (125 MHz,  $\text{CDCl}_3$ )

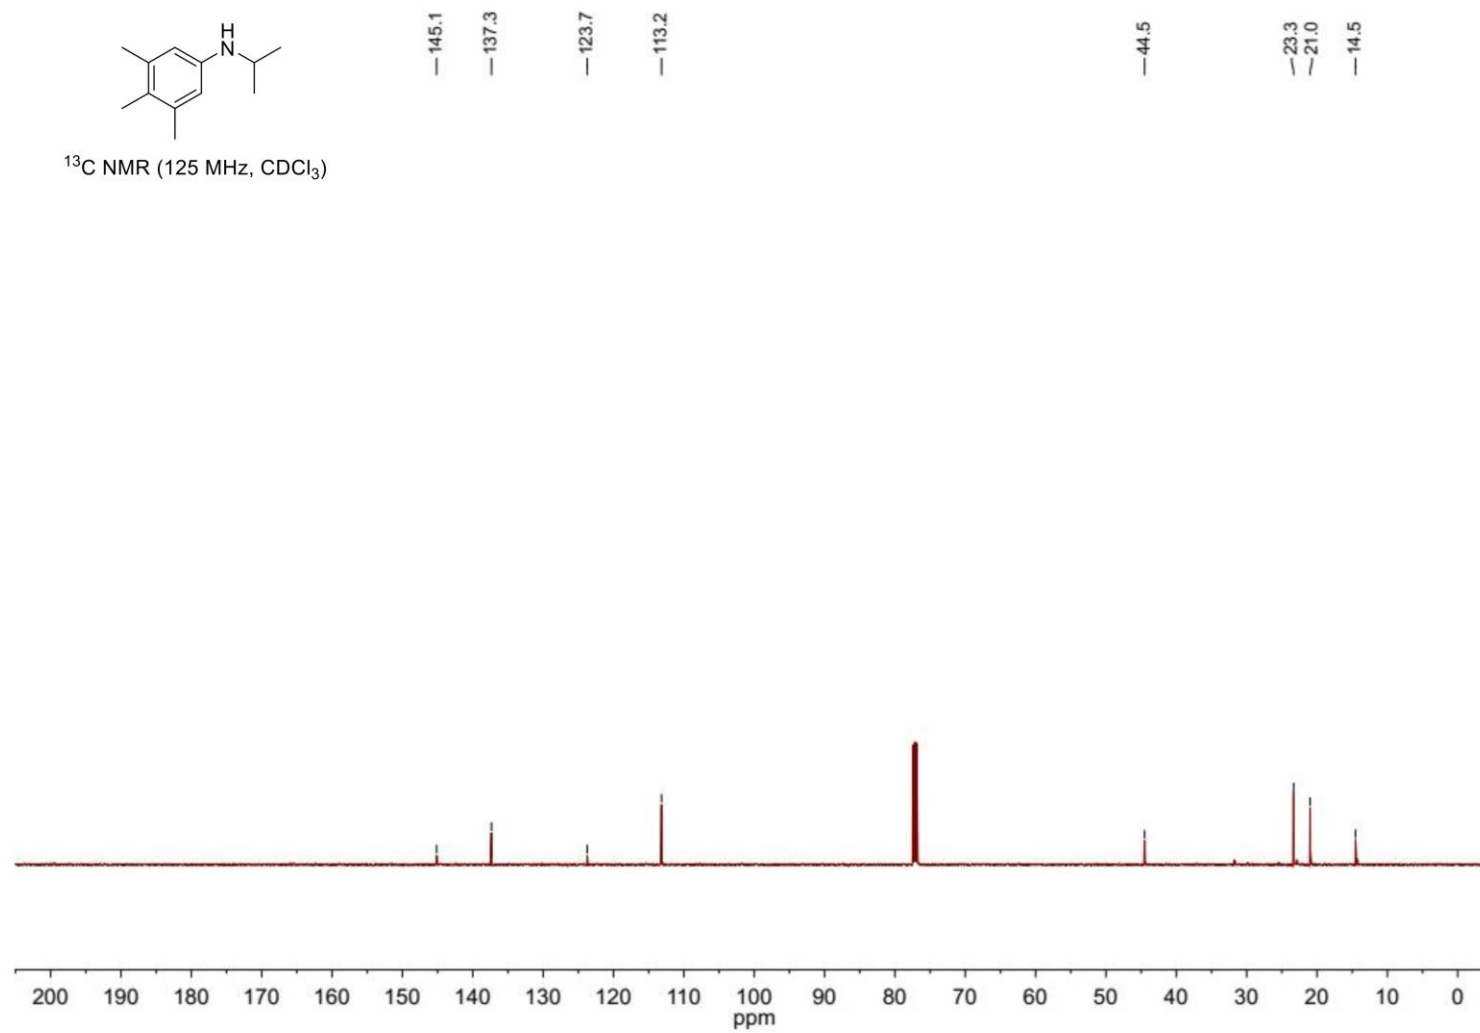

[Go back to table of contents](#)



### N-(4-Methoxyphenyl)adamantan-1-amine (29)

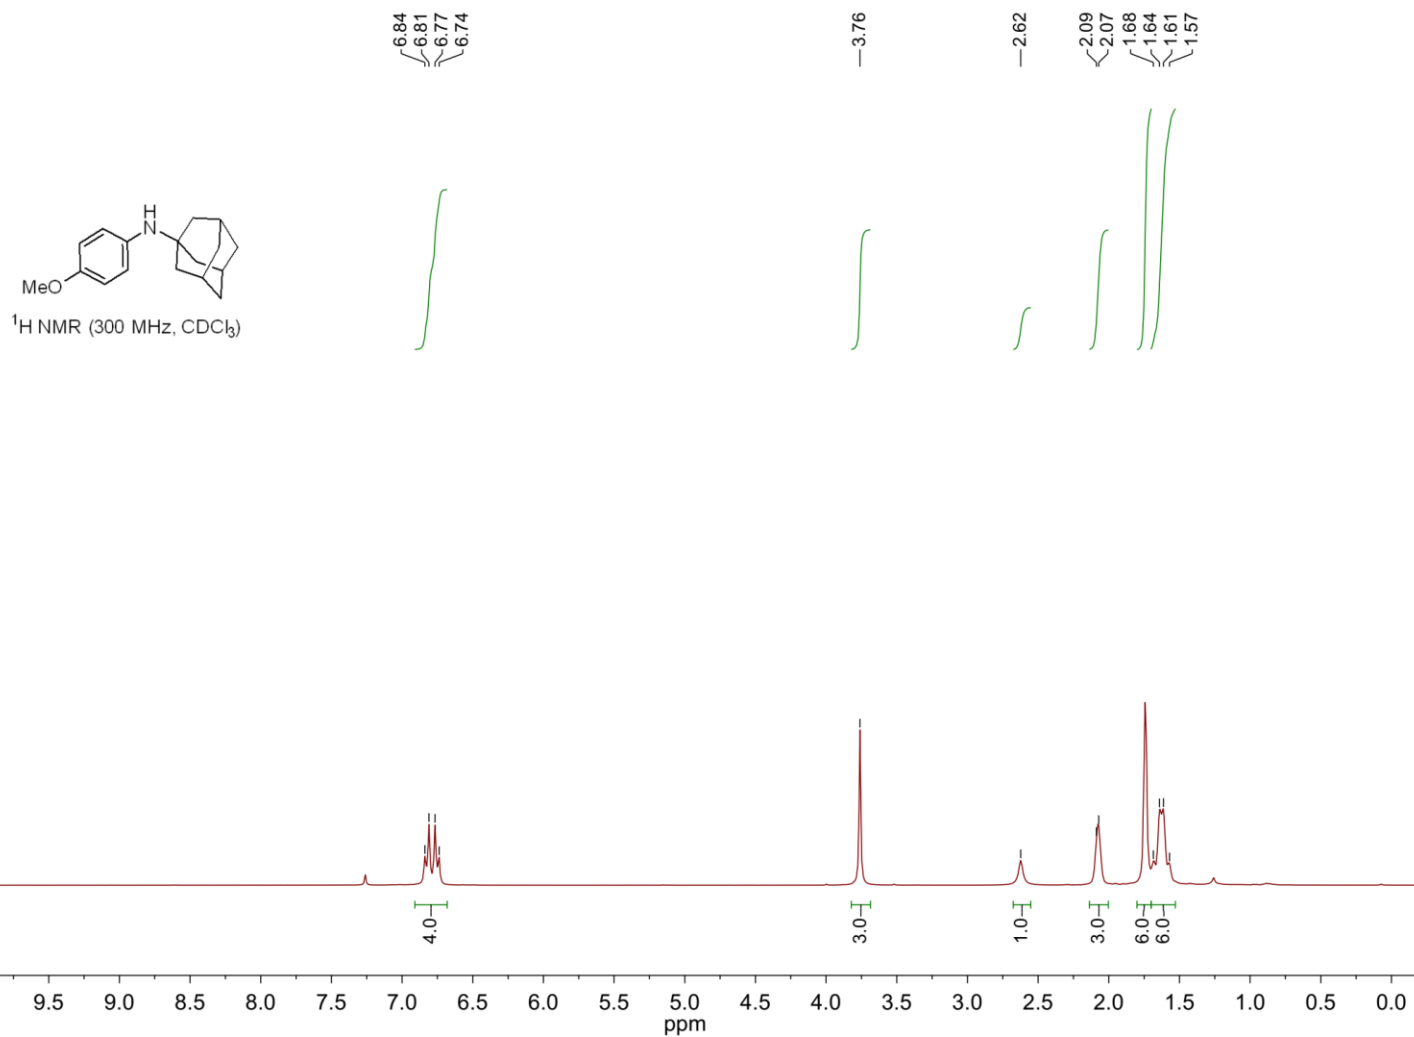

### *N*-(4-Methoxyphenyl)adamantan-1-amine (29)

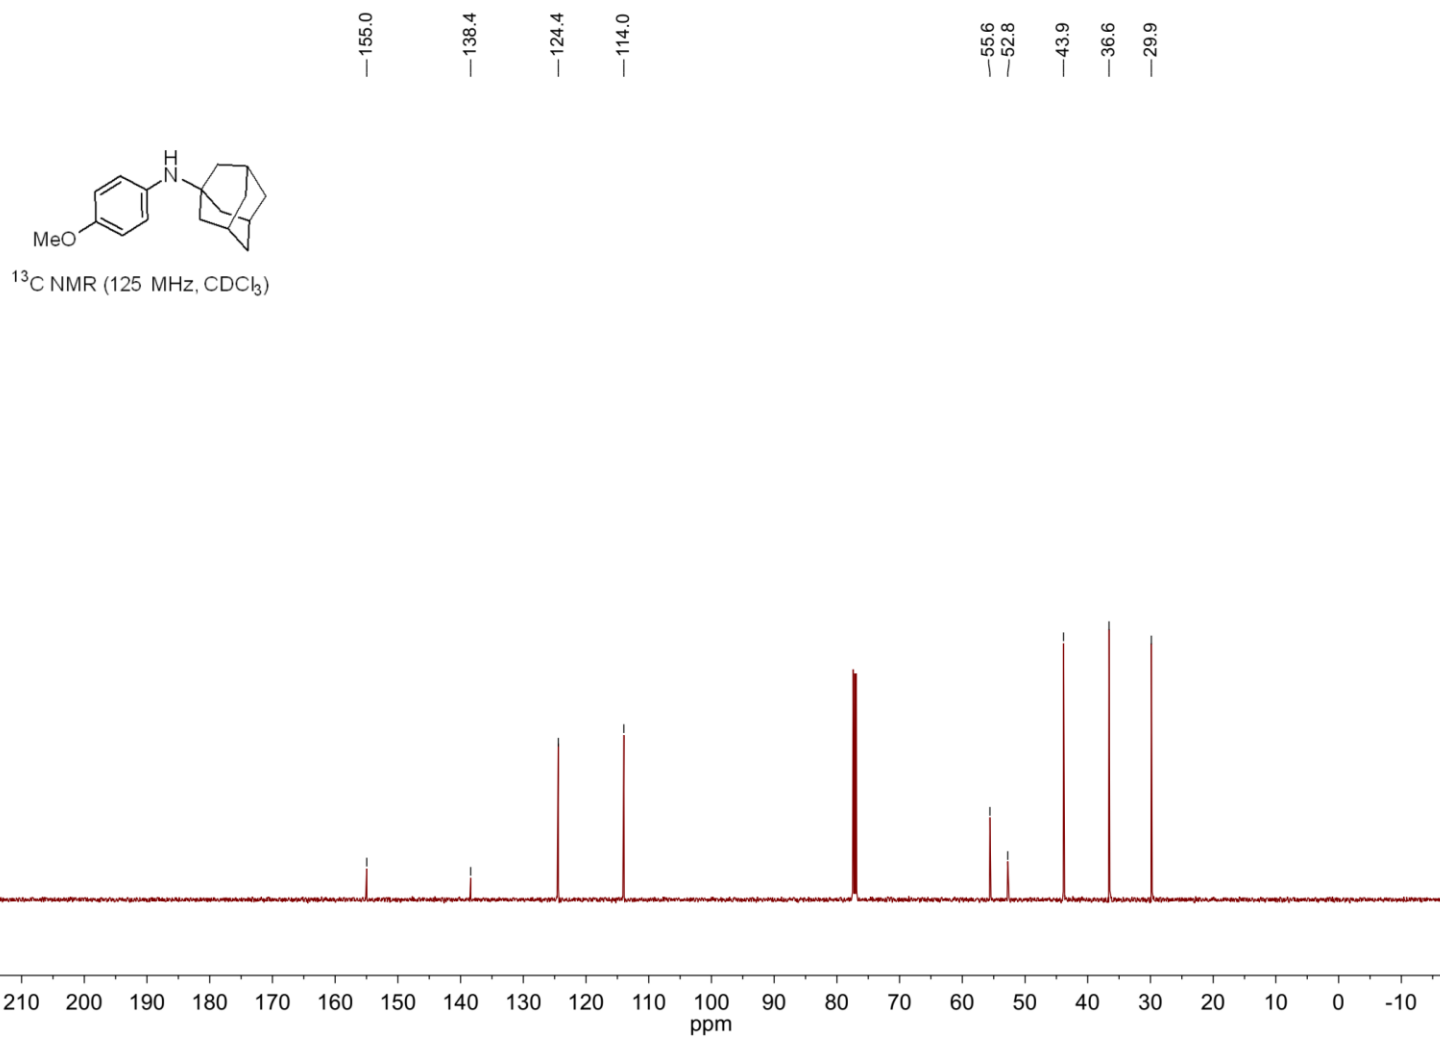

[Go back to table of contents](#)

### *N*-(*p*-Tolyl)adamantan-1-amine (30)

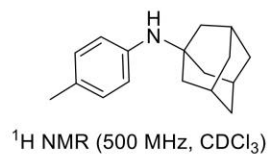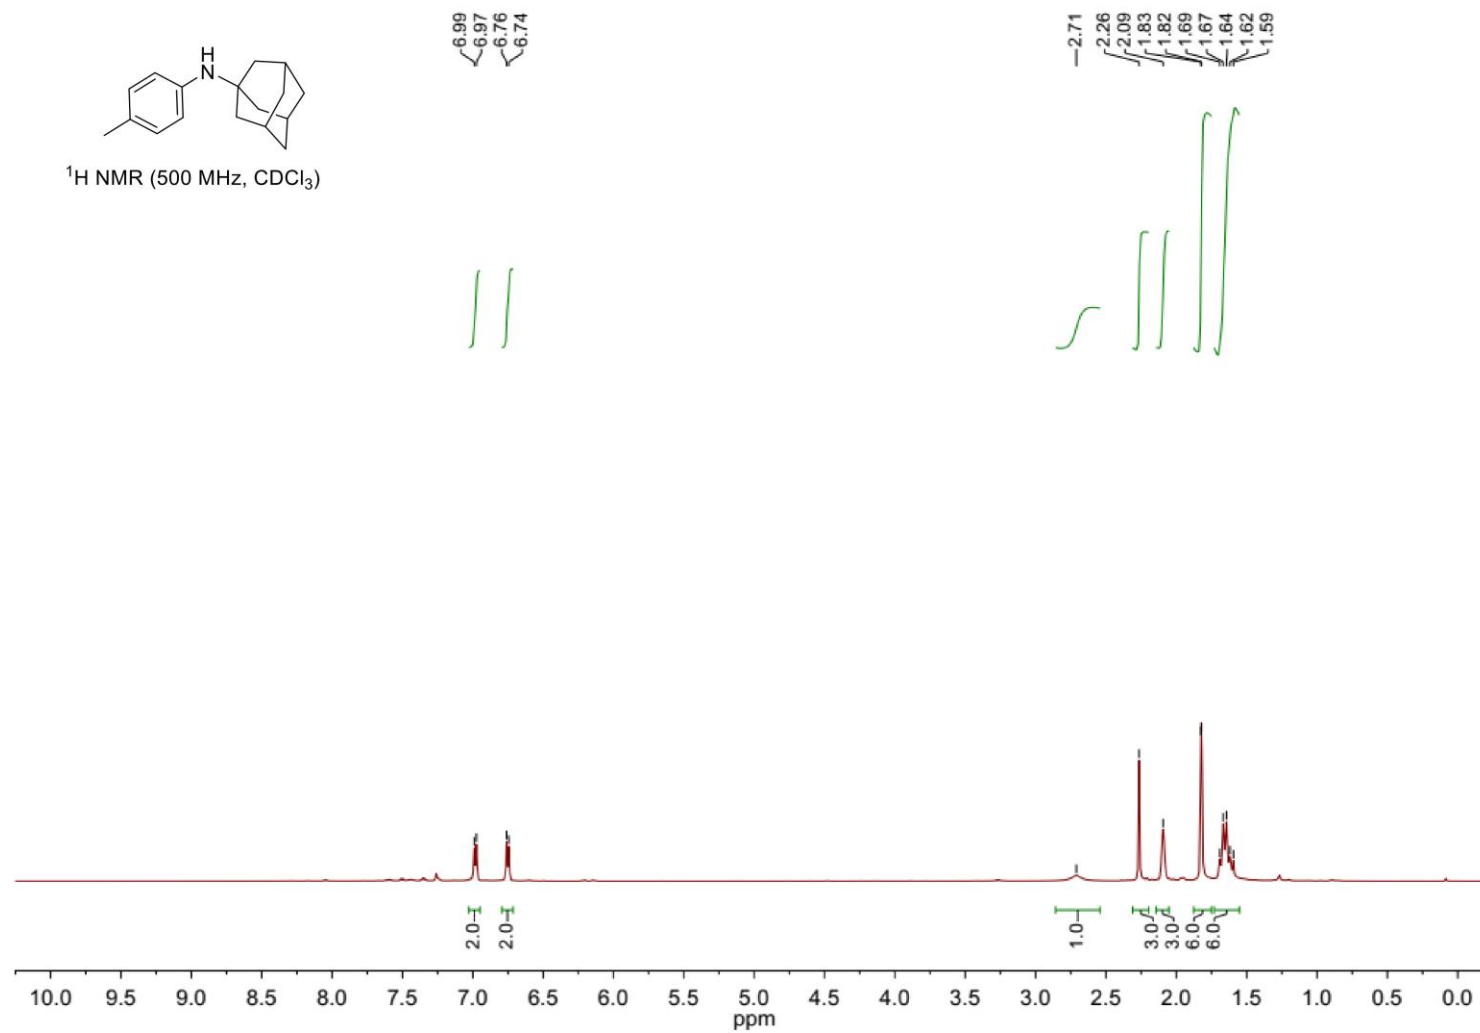

### *N*-(*p*-Tolyl)adamantan-1-amine (30)

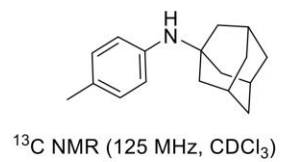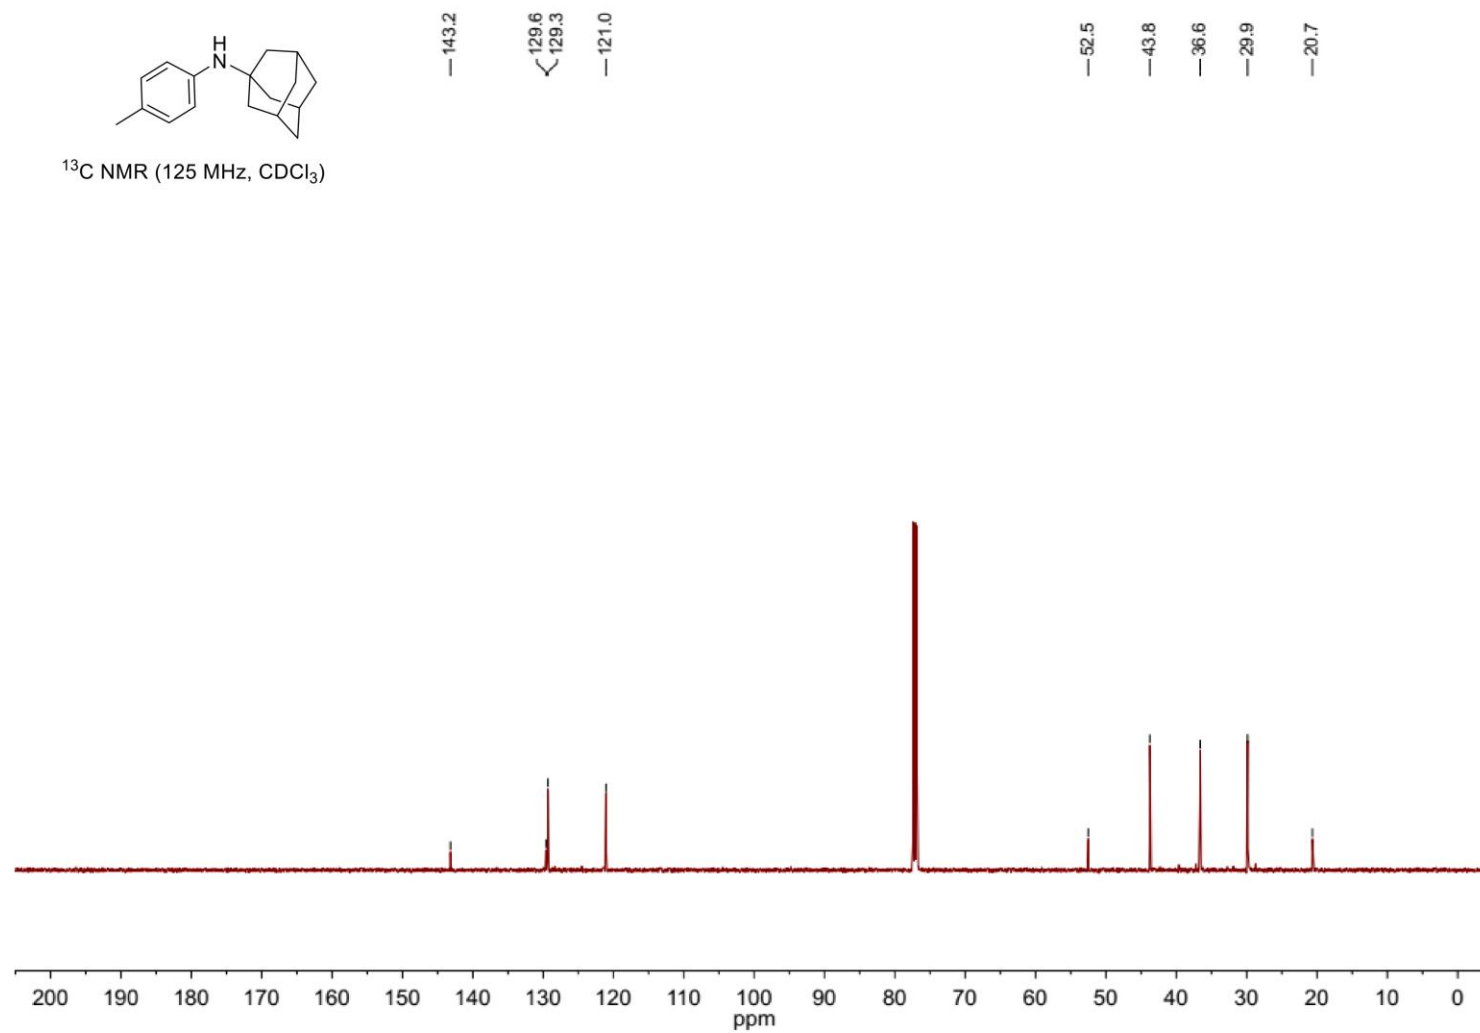

### N-(4-(Trifluoromethyl)phenyl)adamantan-1-amine (31)

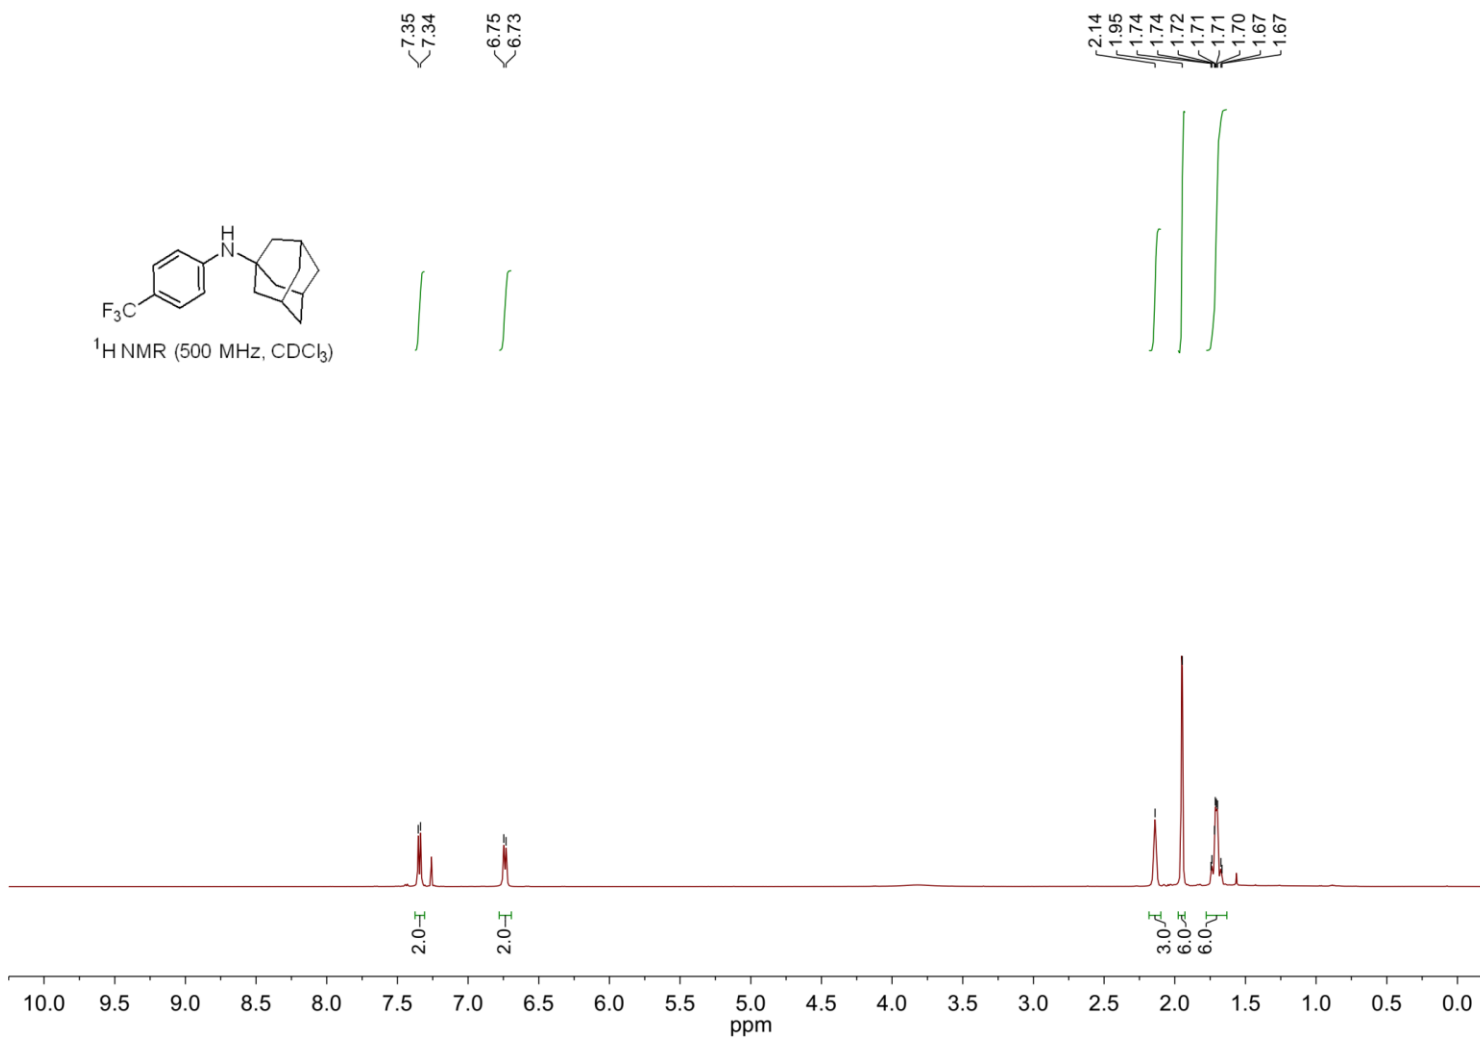

### N-(4-(Trifluoromethyl)phenyl)adamantan-1-amine (31)

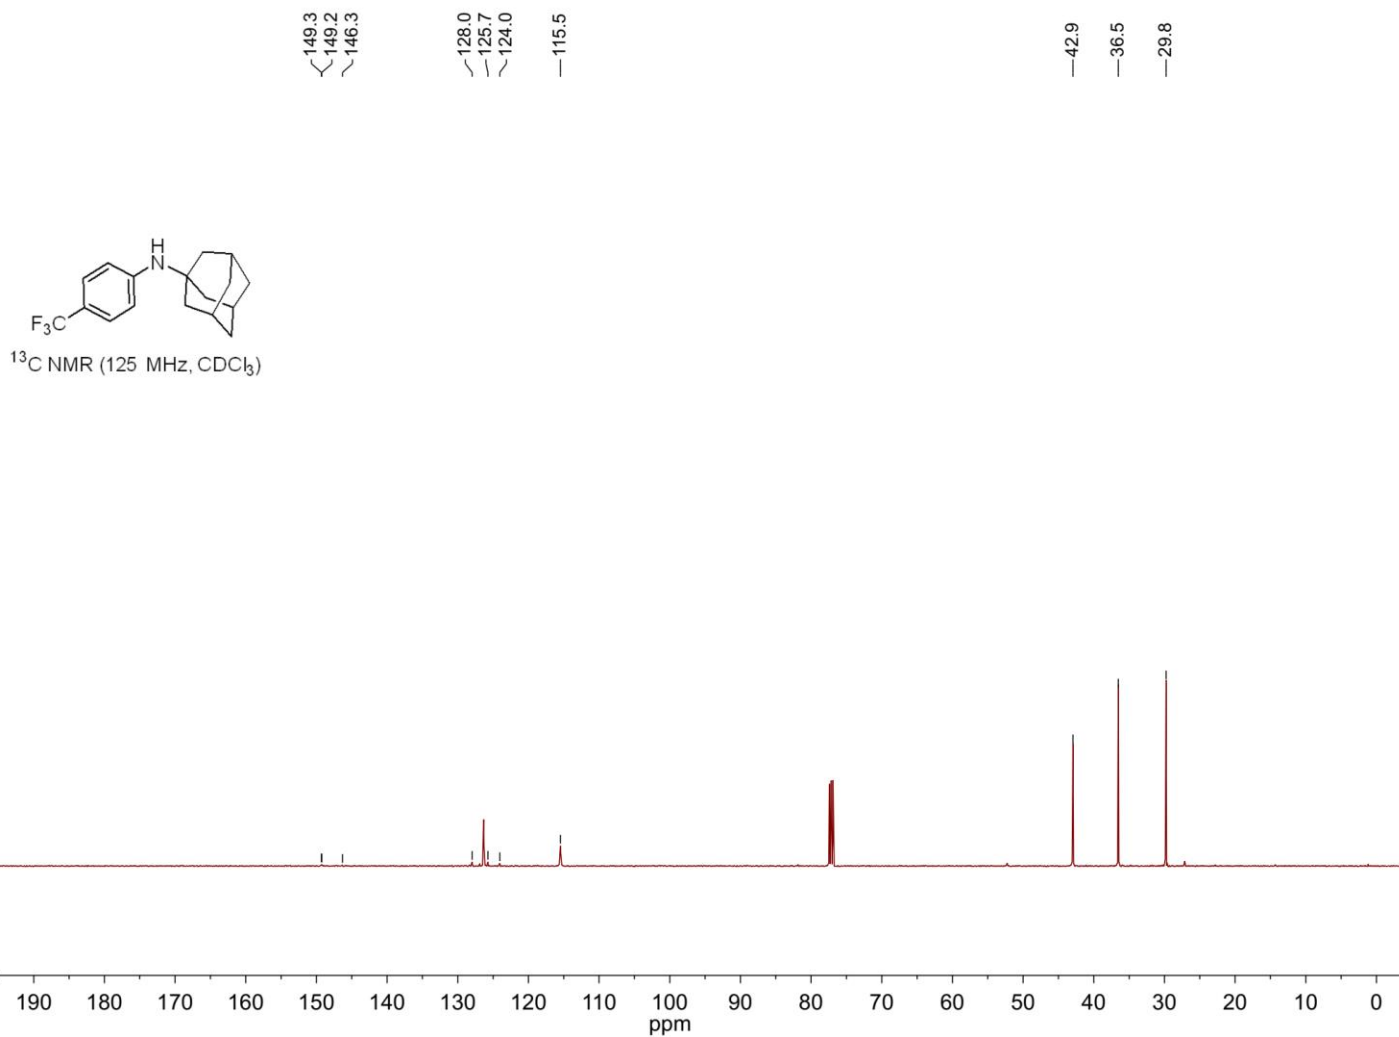

### N-(3,4,5-Trimethylphenyl)adamantan-1-amine (32)

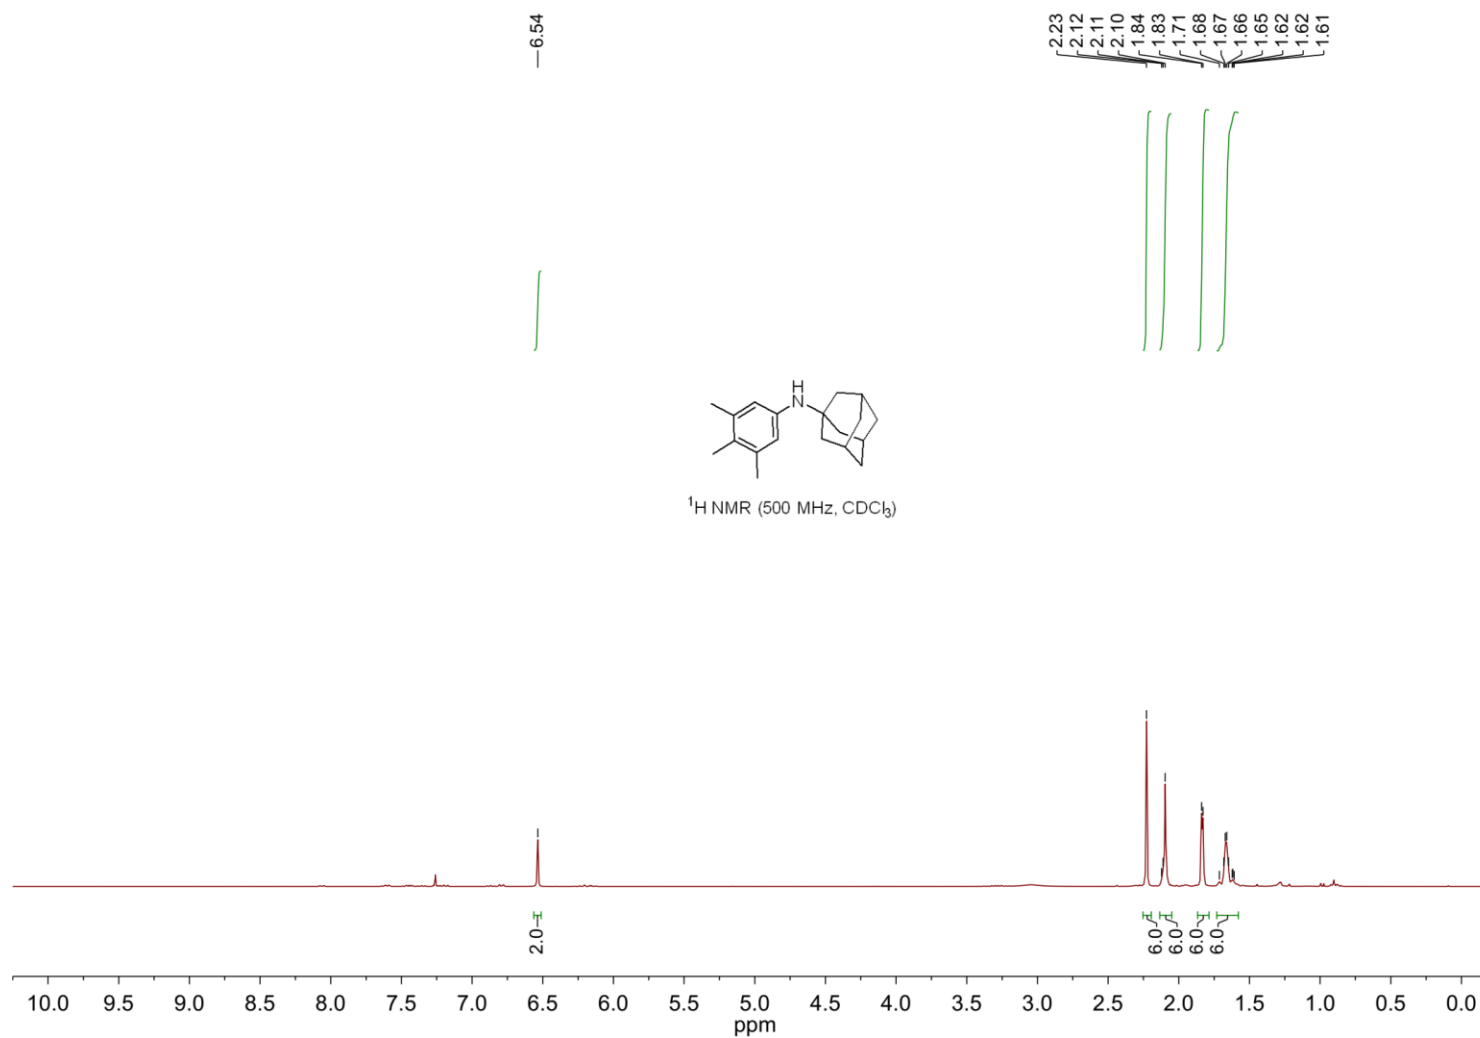

[Go back to table of contents](#)

### *N*-(3,4,5-Trimethylphenyl)adamantan-1-amine (32)

—142.9      —136.6      —126.9      —120.5      —52.4      —43.8      —36.6      —29.9      —20.9      —14.7

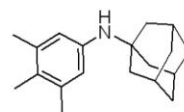

<sup>13</sup>C NMR (125 MHz, CDCl<sub>3</sub>)

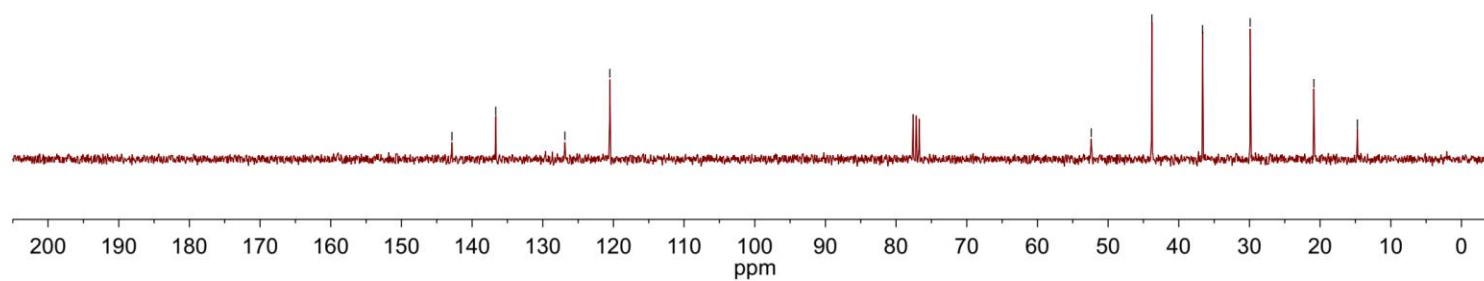

[Go back to table of contents](#)



### *N*-Isobutyl-4-methoxy-*N*-methylaniline (33)

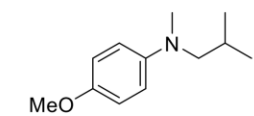

<sup>1</sup>H NMR (500 MHz, CDCl<sub>3</sub>)

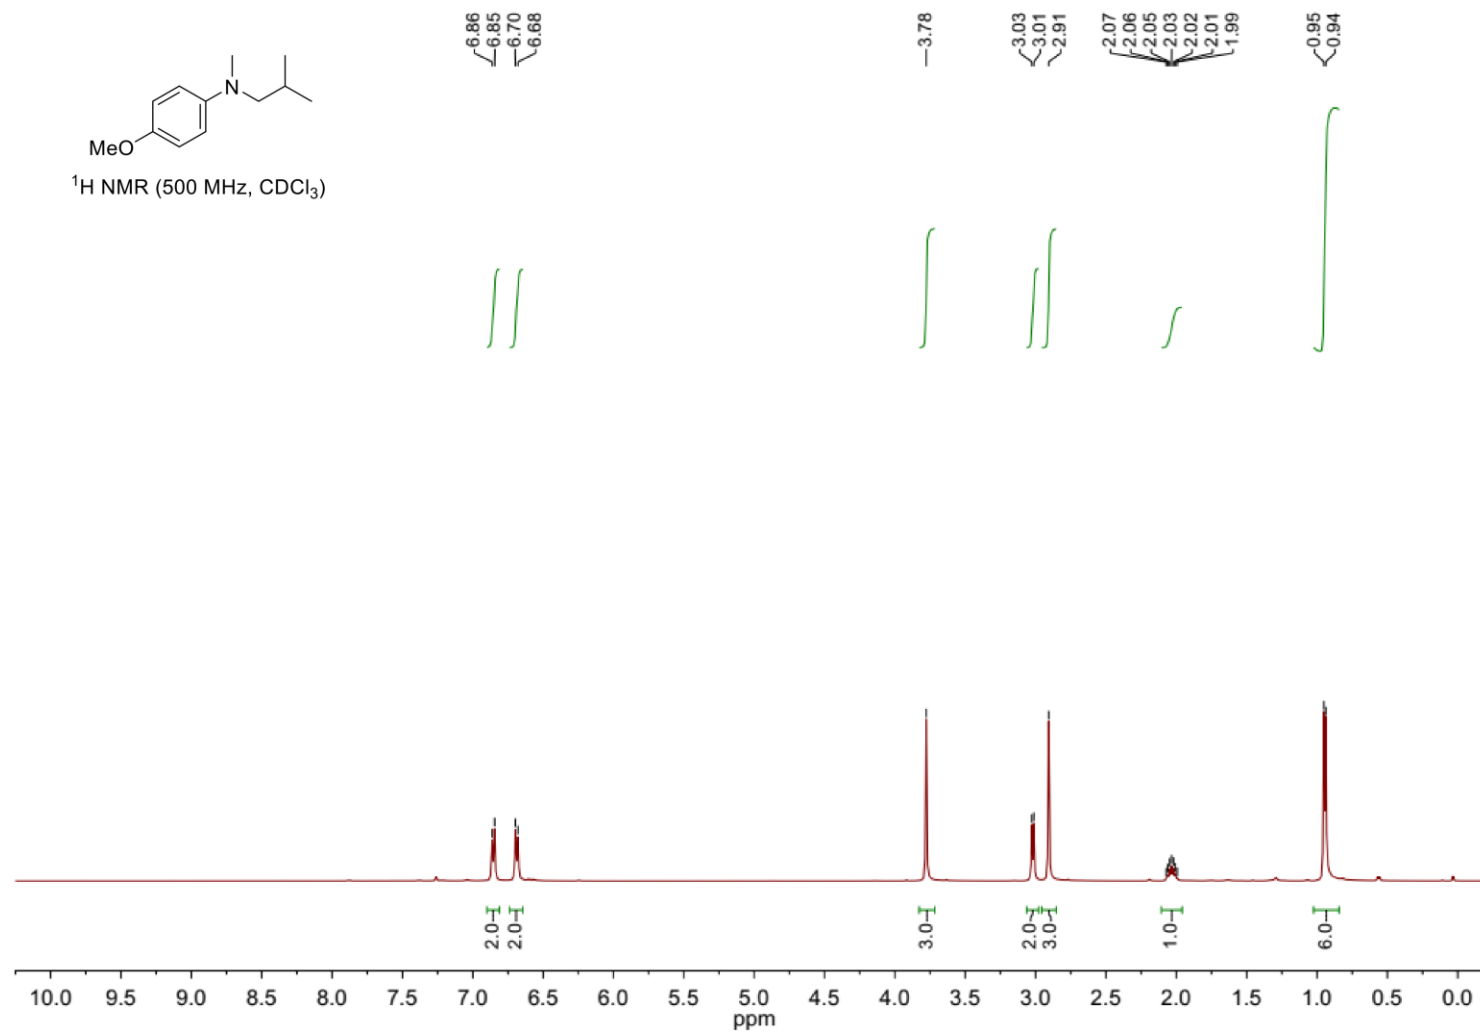

### N-Isobutyl-4-methoxy-N-methylaniline (33)

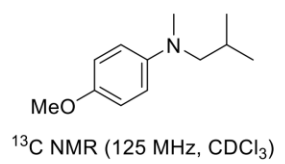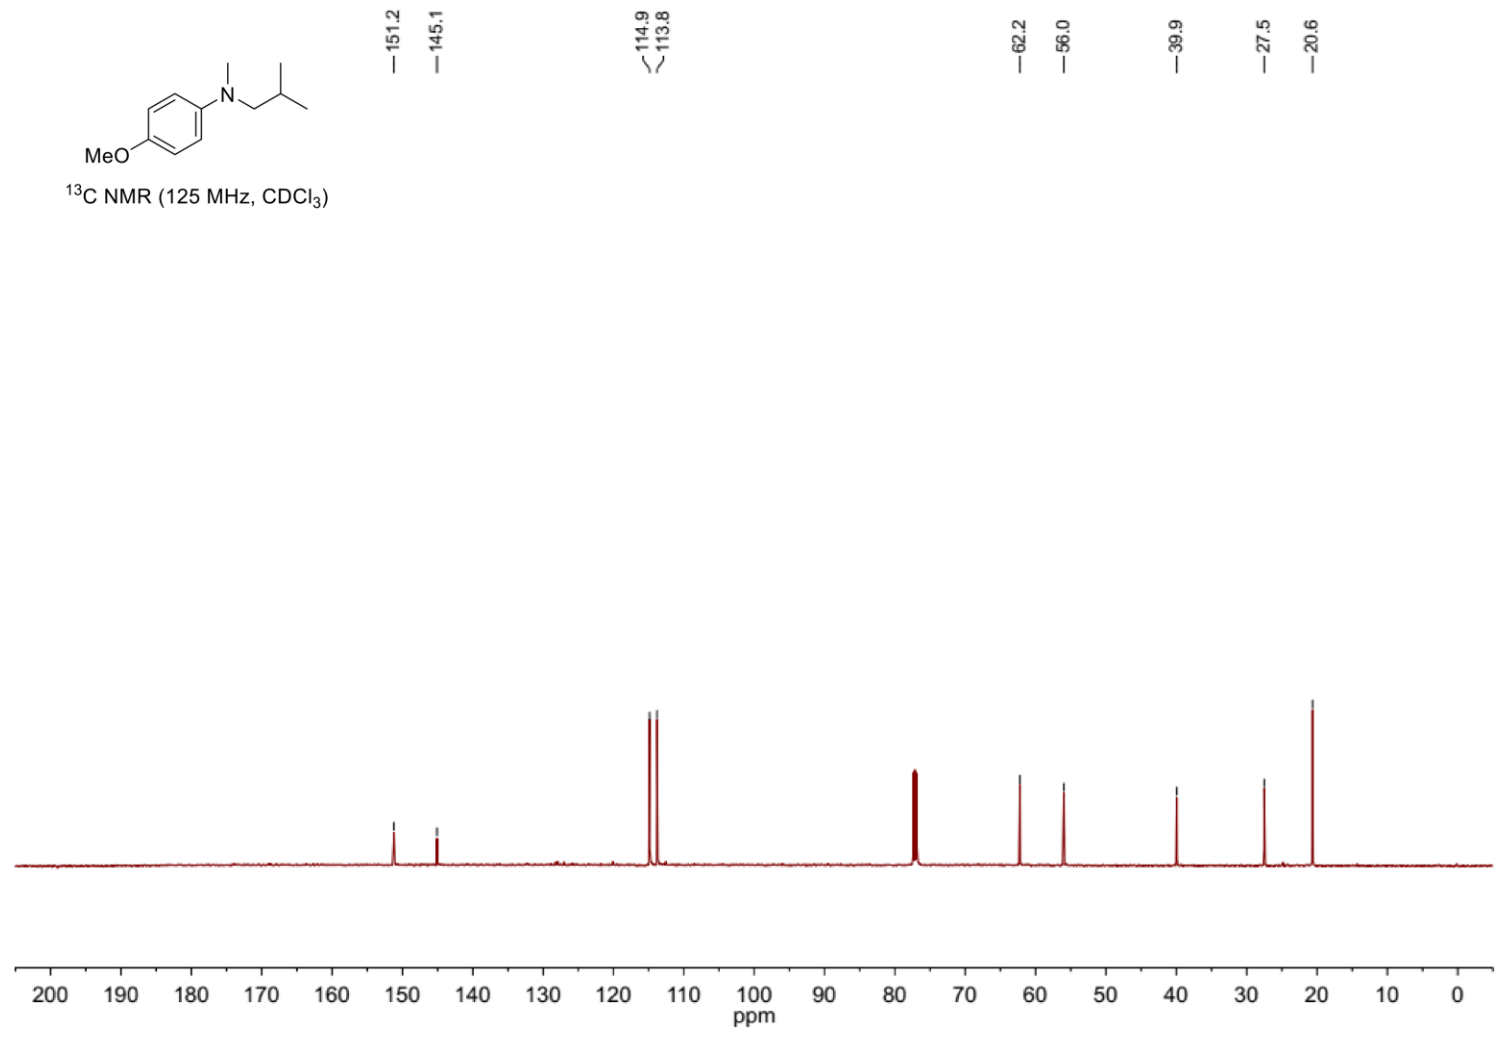

[Go back to table of contents](#)

### N-(4-Iodobenzyl)-4-methoxy-N-methylaniline (34)

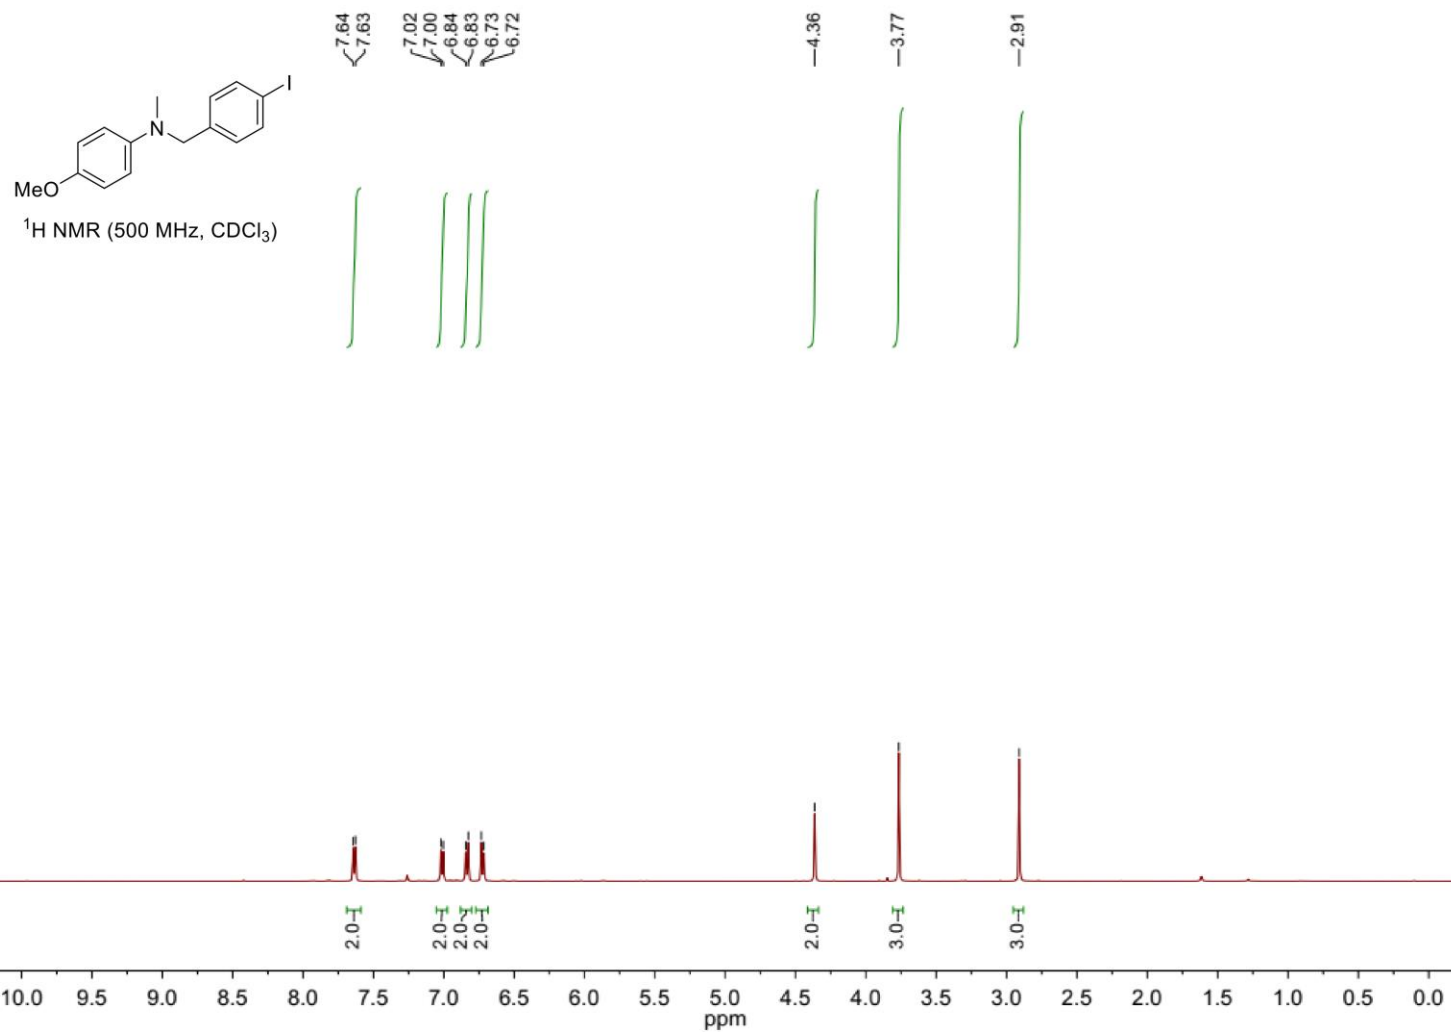

[Go back to table of contents](#)

### *N*-(4-Iodobenzyl)-4-methoxy-*N*-methylaniline (34)

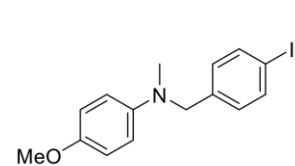

<sup>13</sup>C NMR (125 MHz, CDCl<sub>3</sub>)

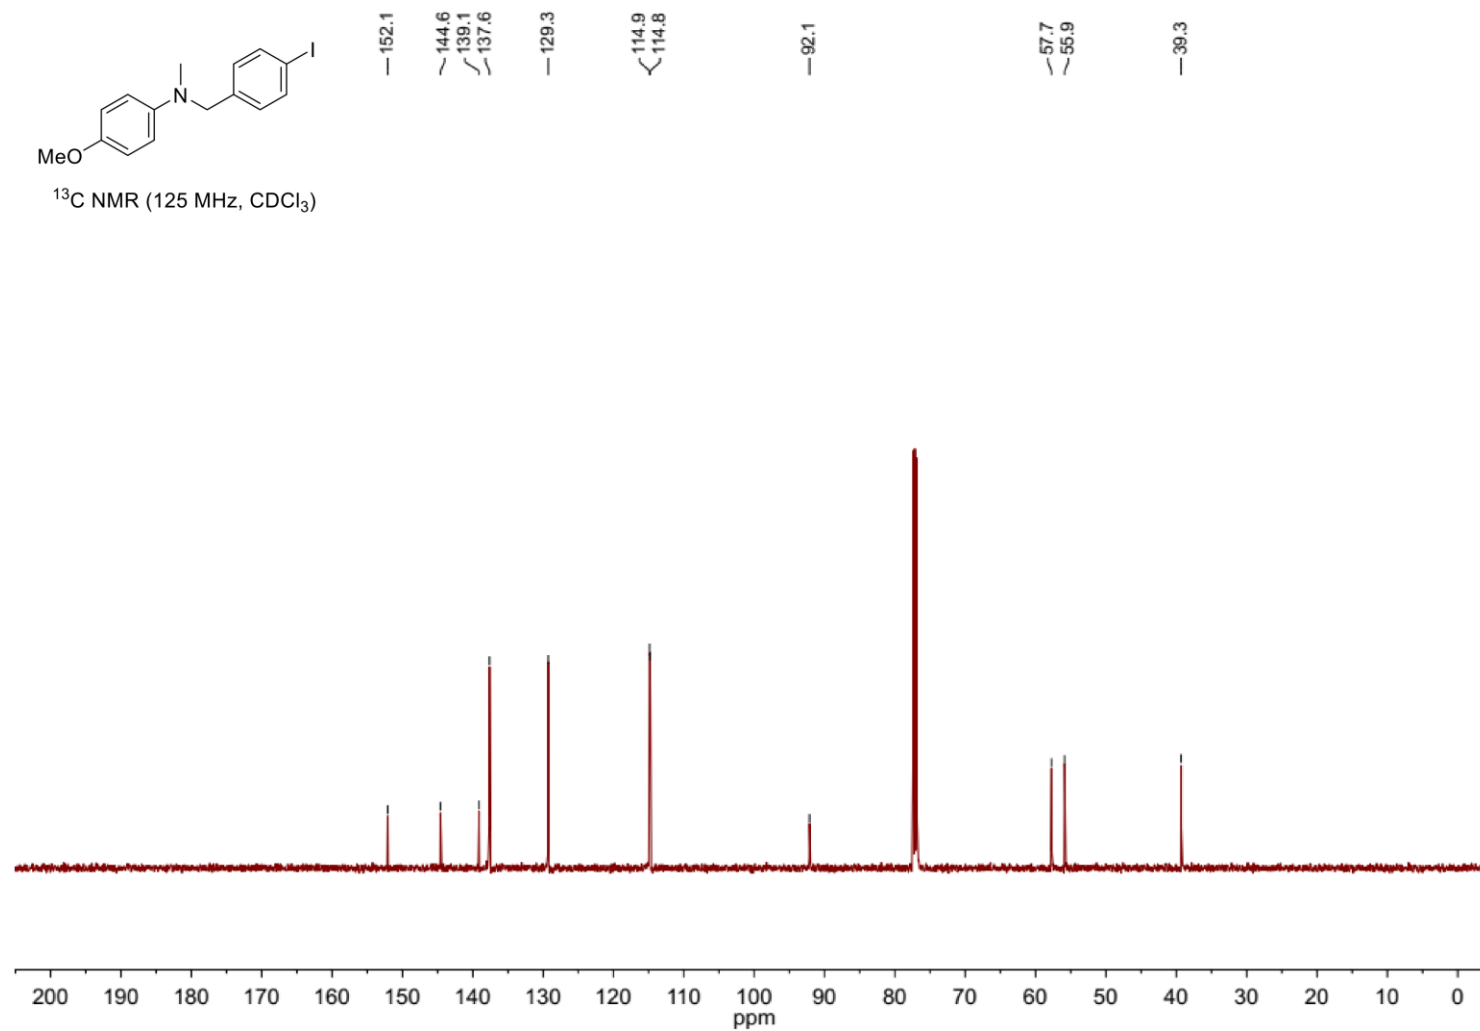

### 4-Chloro-N-methyl-N-(3,3,3-trifluoropropyl)aniline (35)

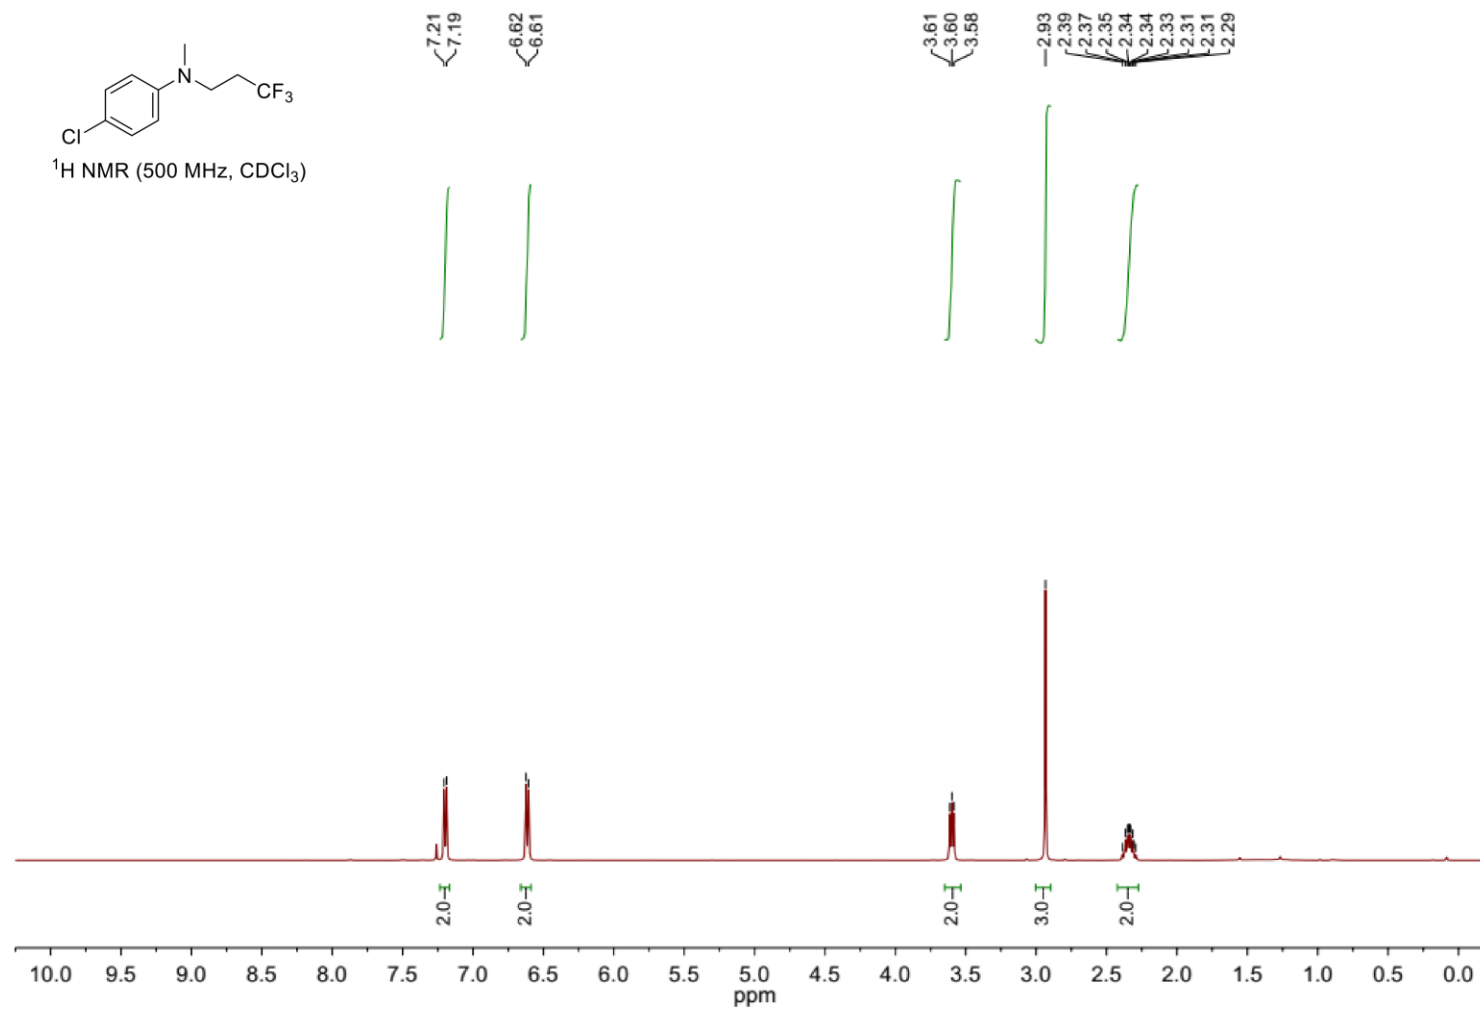

### 4-Chloro-*N*-methyl-*N*-(3,3,3-trifluoropropyl)aniline (35)

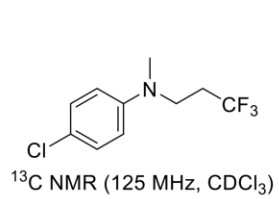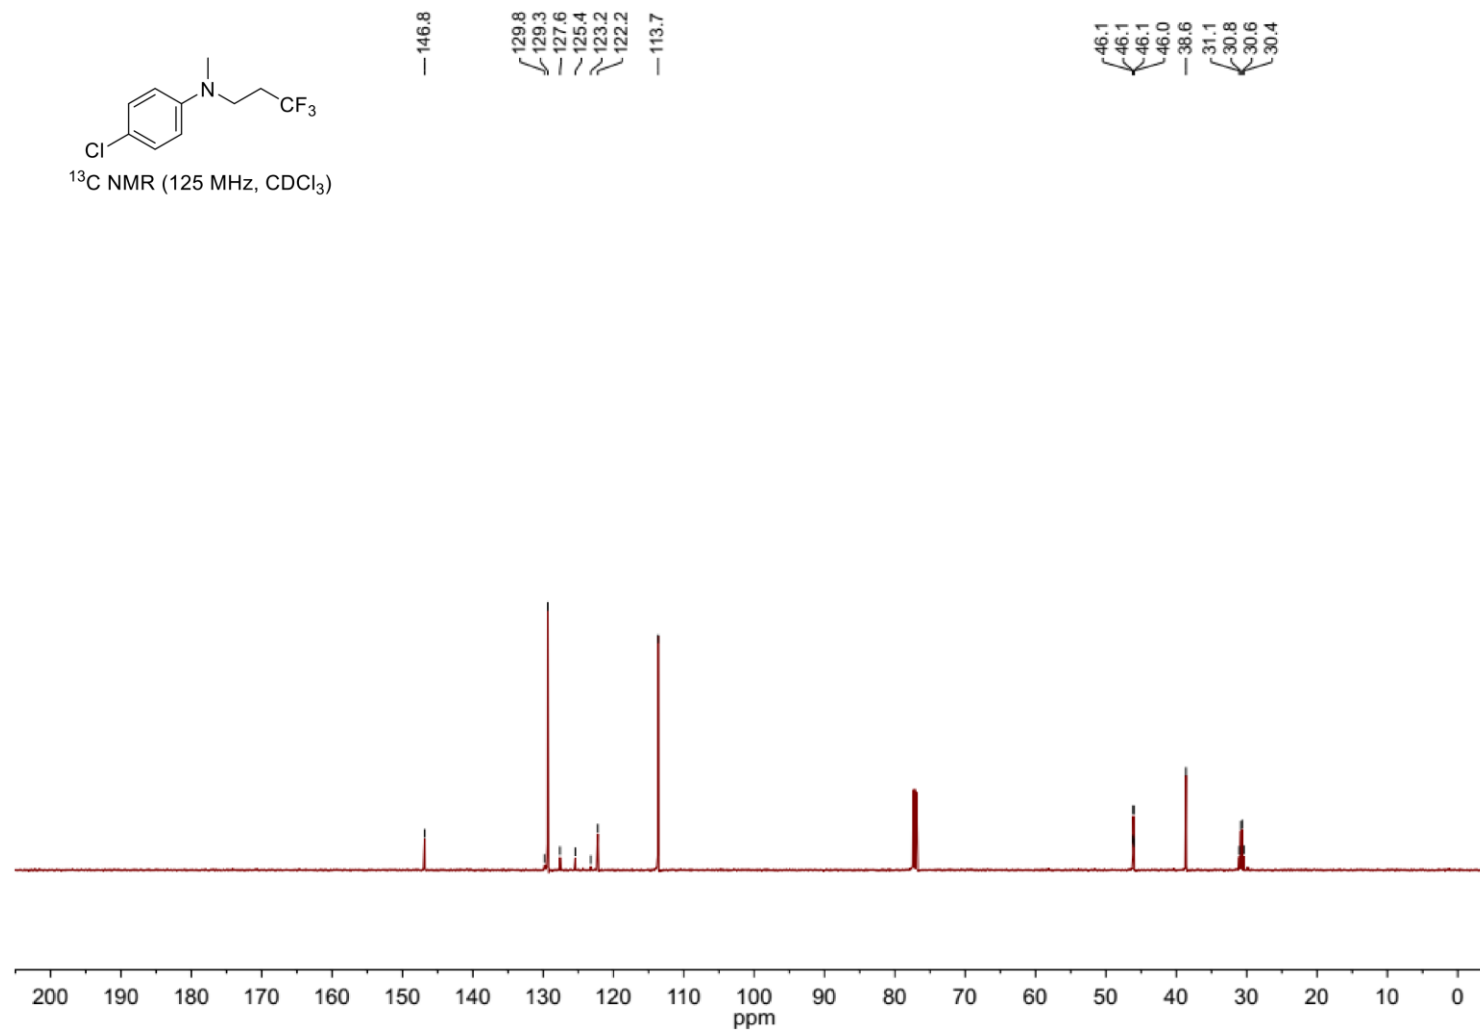

### *N*-(4-Fluorophenethyl)-4-methoxy-*N*-methylaniline (36)

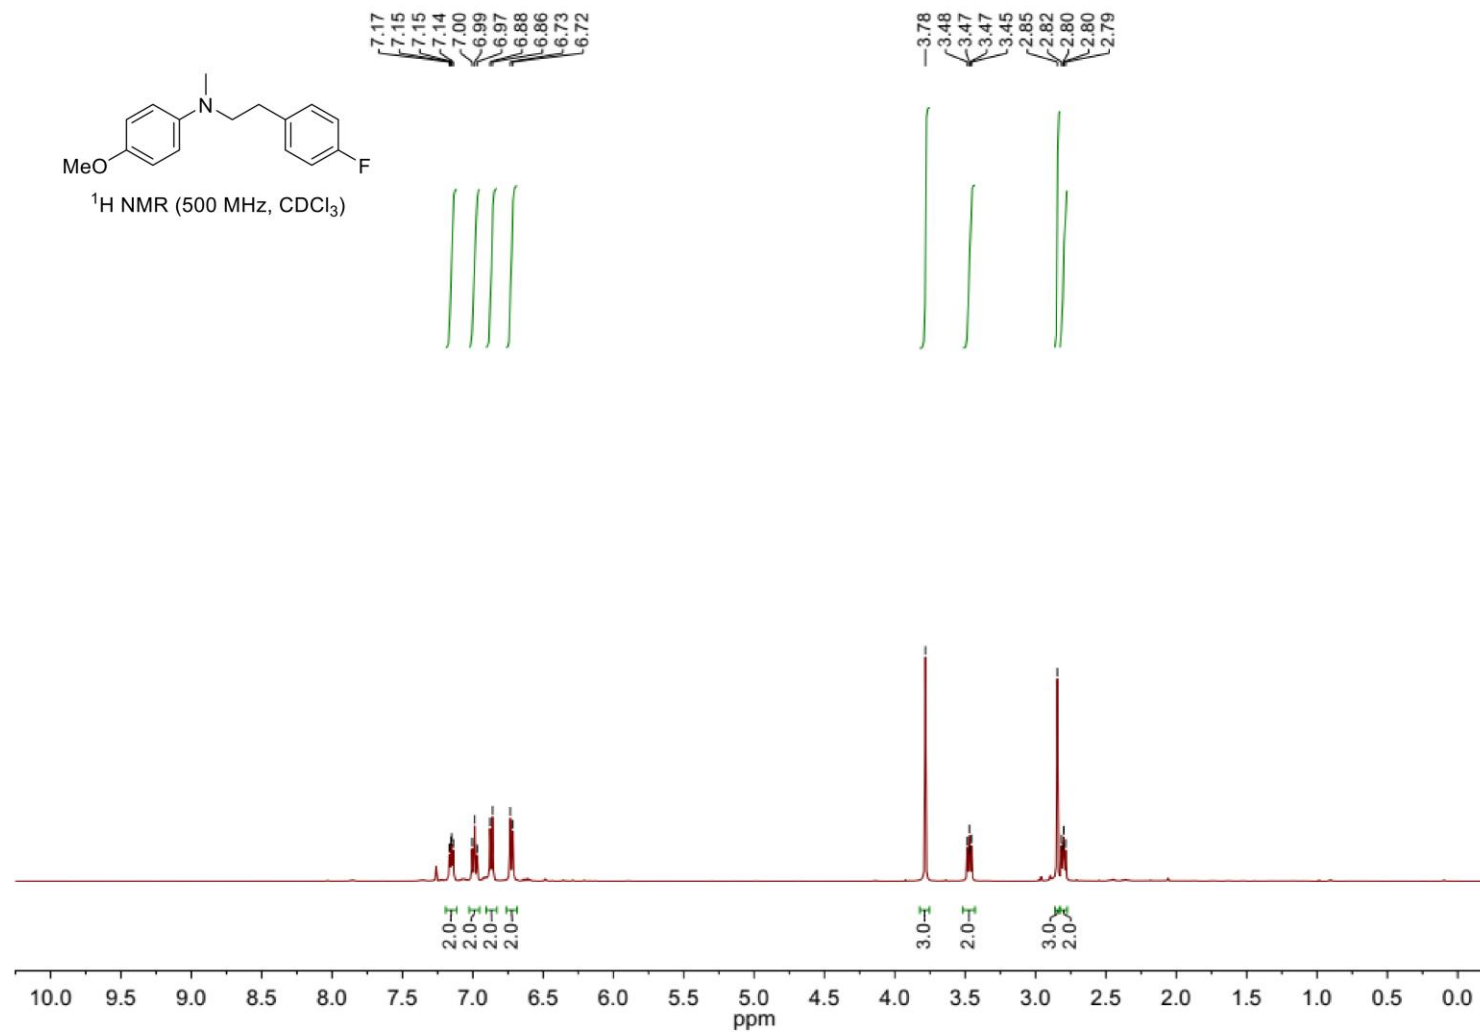

### *N*-(4-Fluorophenethyl)-4-methoxy-*N*-methylaniline (36)

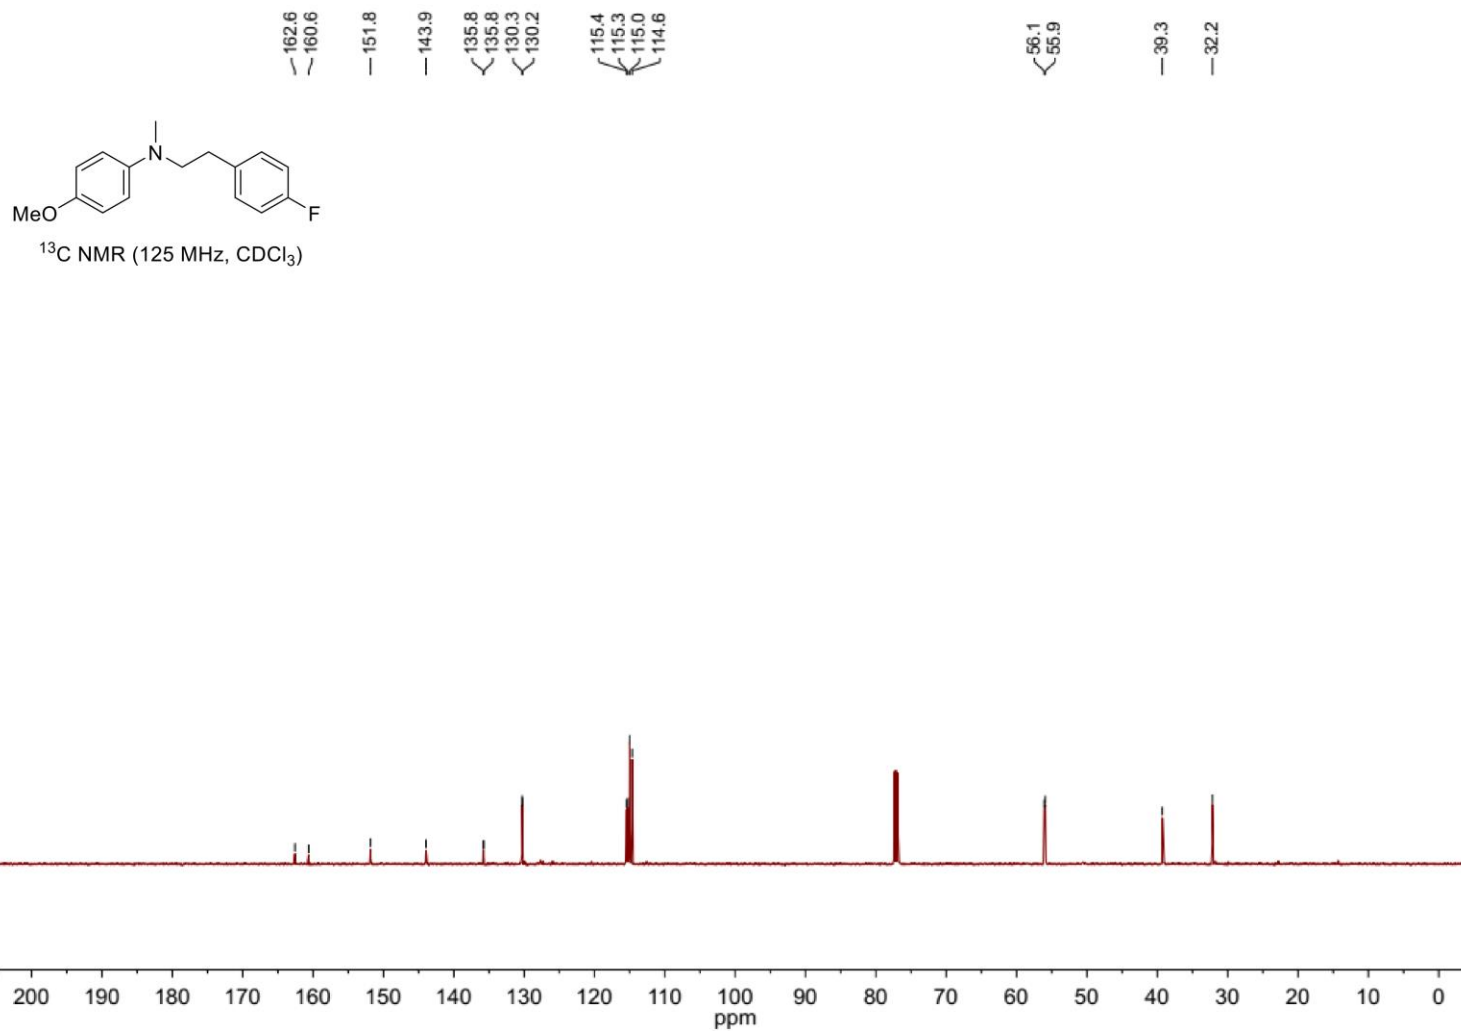



### 4-Methoxy-N-(4-methoxyphenethyl)-N-methylaniline (37)

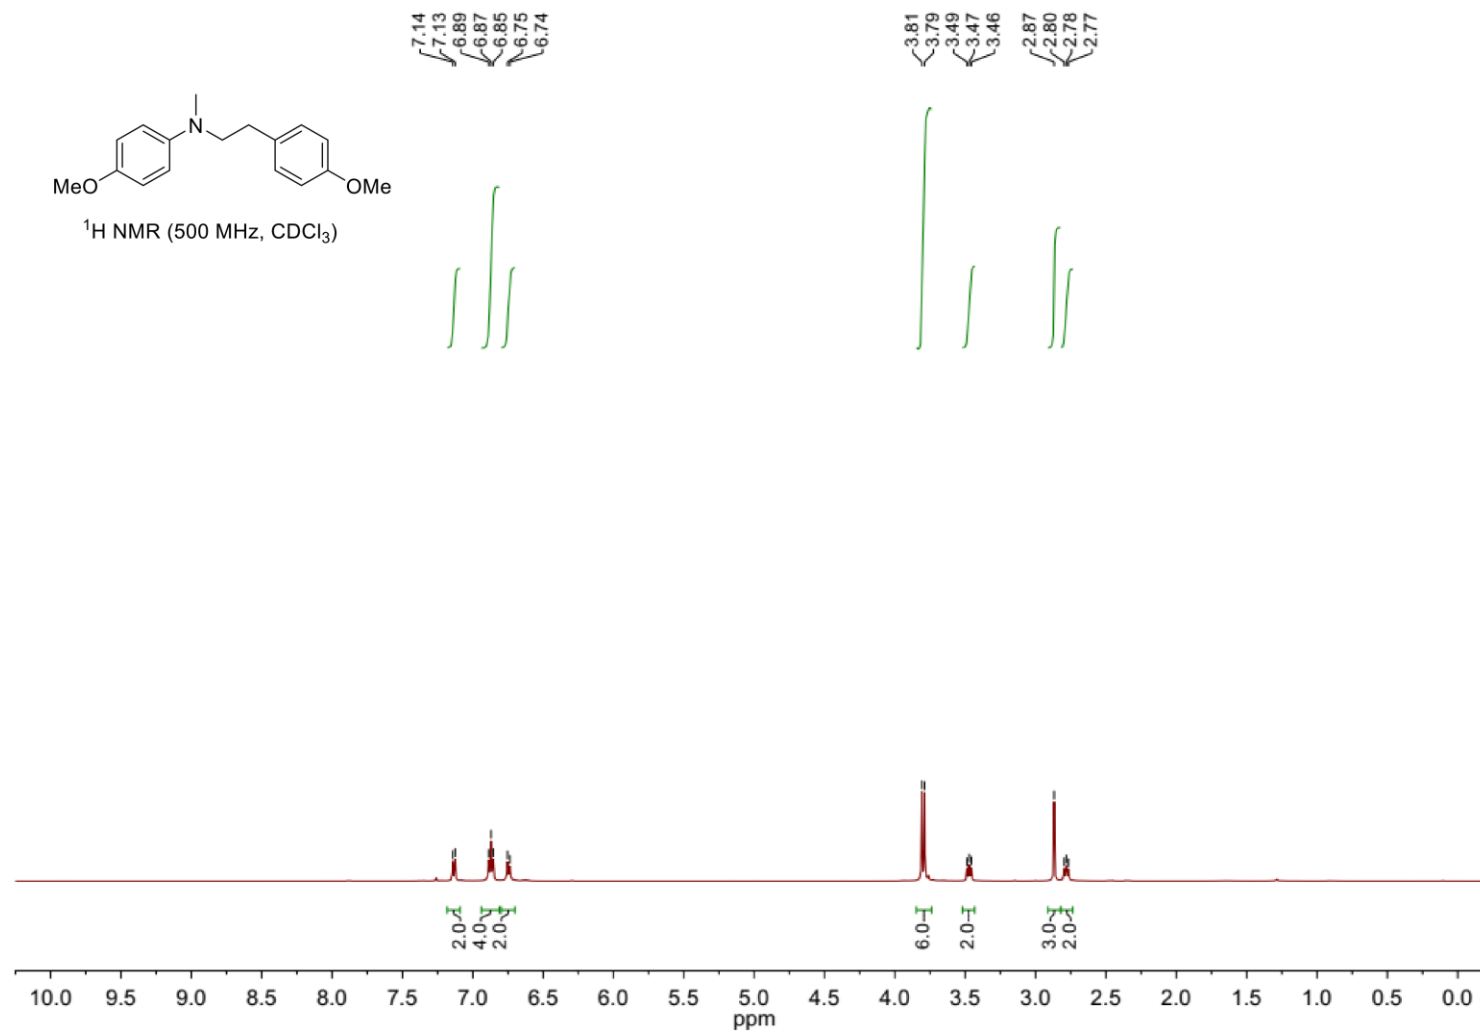

### 4-Methoxy-N-(4-methoxyphenethyl)-N-methylaniline (37)

— 168.1  
— 151.7  
— 144.0  
— 132.1  
— 129.8  
— 115.0  
— 114.5  
— 114.0  
— 56.1  
— 55.9  
— 55.4  
— 39.2  
— 31.9

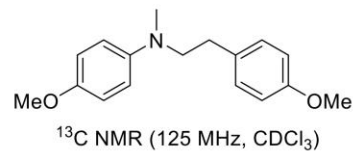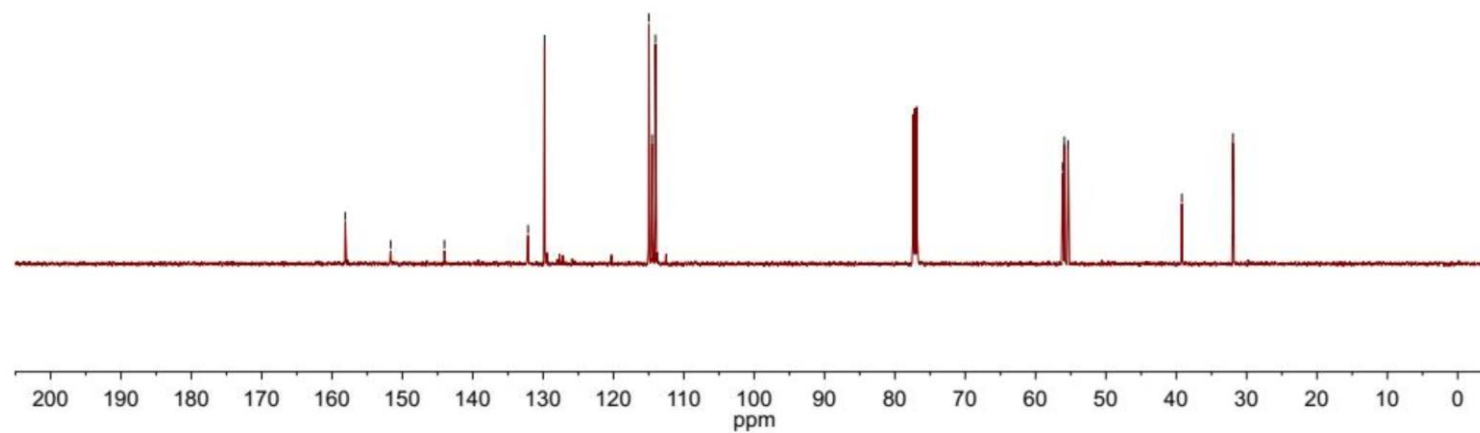

[Go back to table of contents](#)

### 4-Methyl-3,4-dihydro-2H-benzo[b][1,4]oxazine (38)

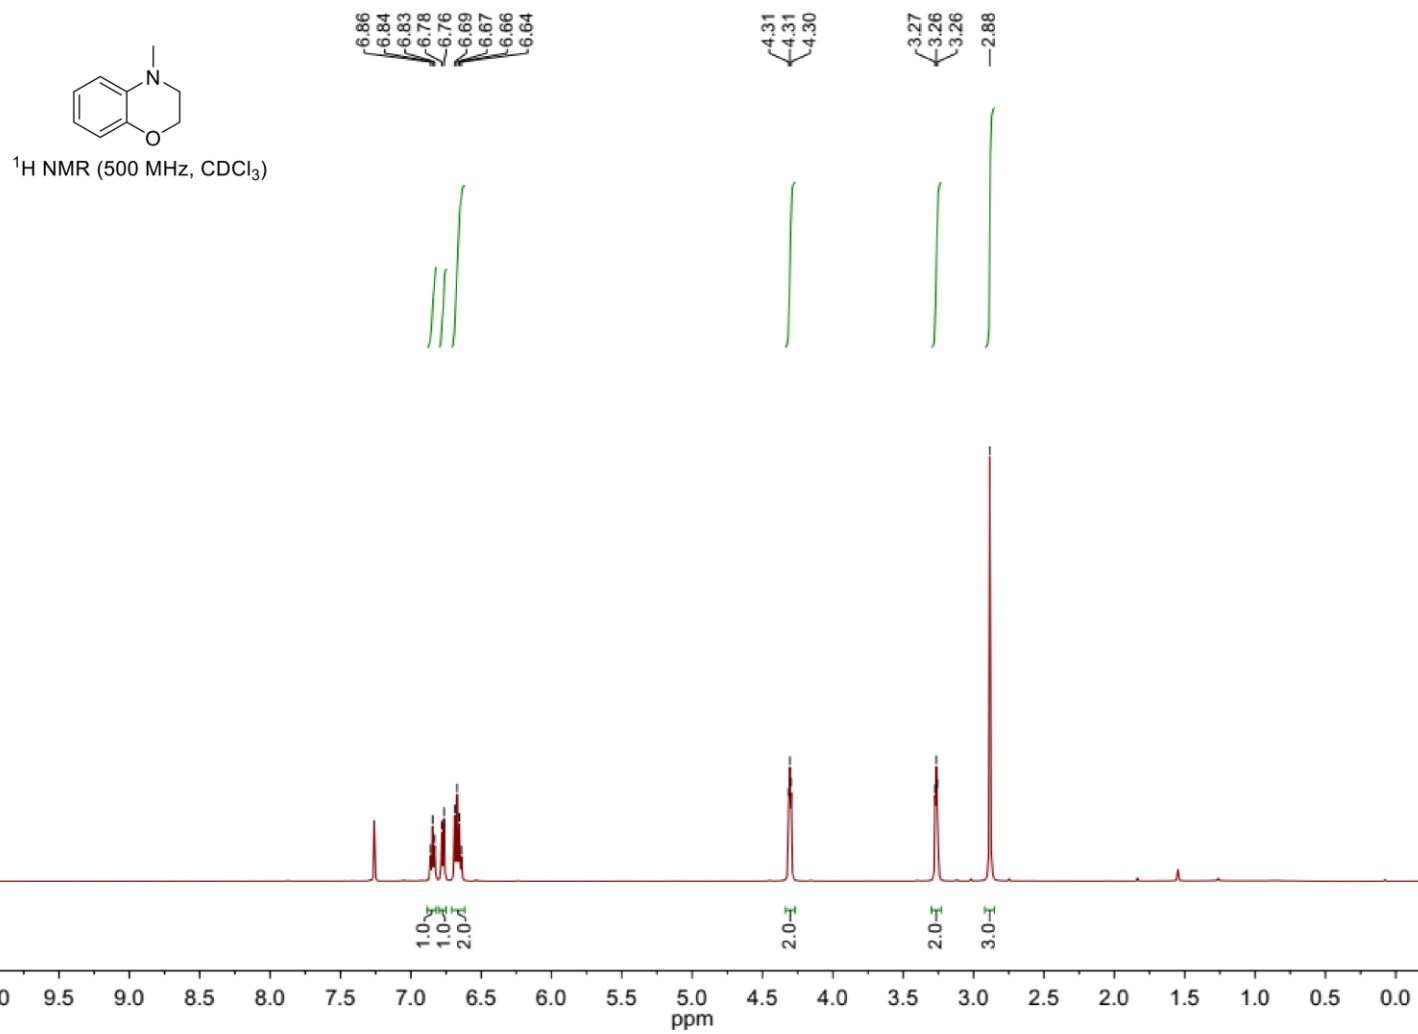

[Go back to table of contents](#)

### 4-Methyl-3,4-dihydro-2H-benzo[b][1,4]oxazine (38)

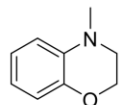

$^{13}\text{C}$  NMR (125 MHz,  $\text{CDCl}_3$ )

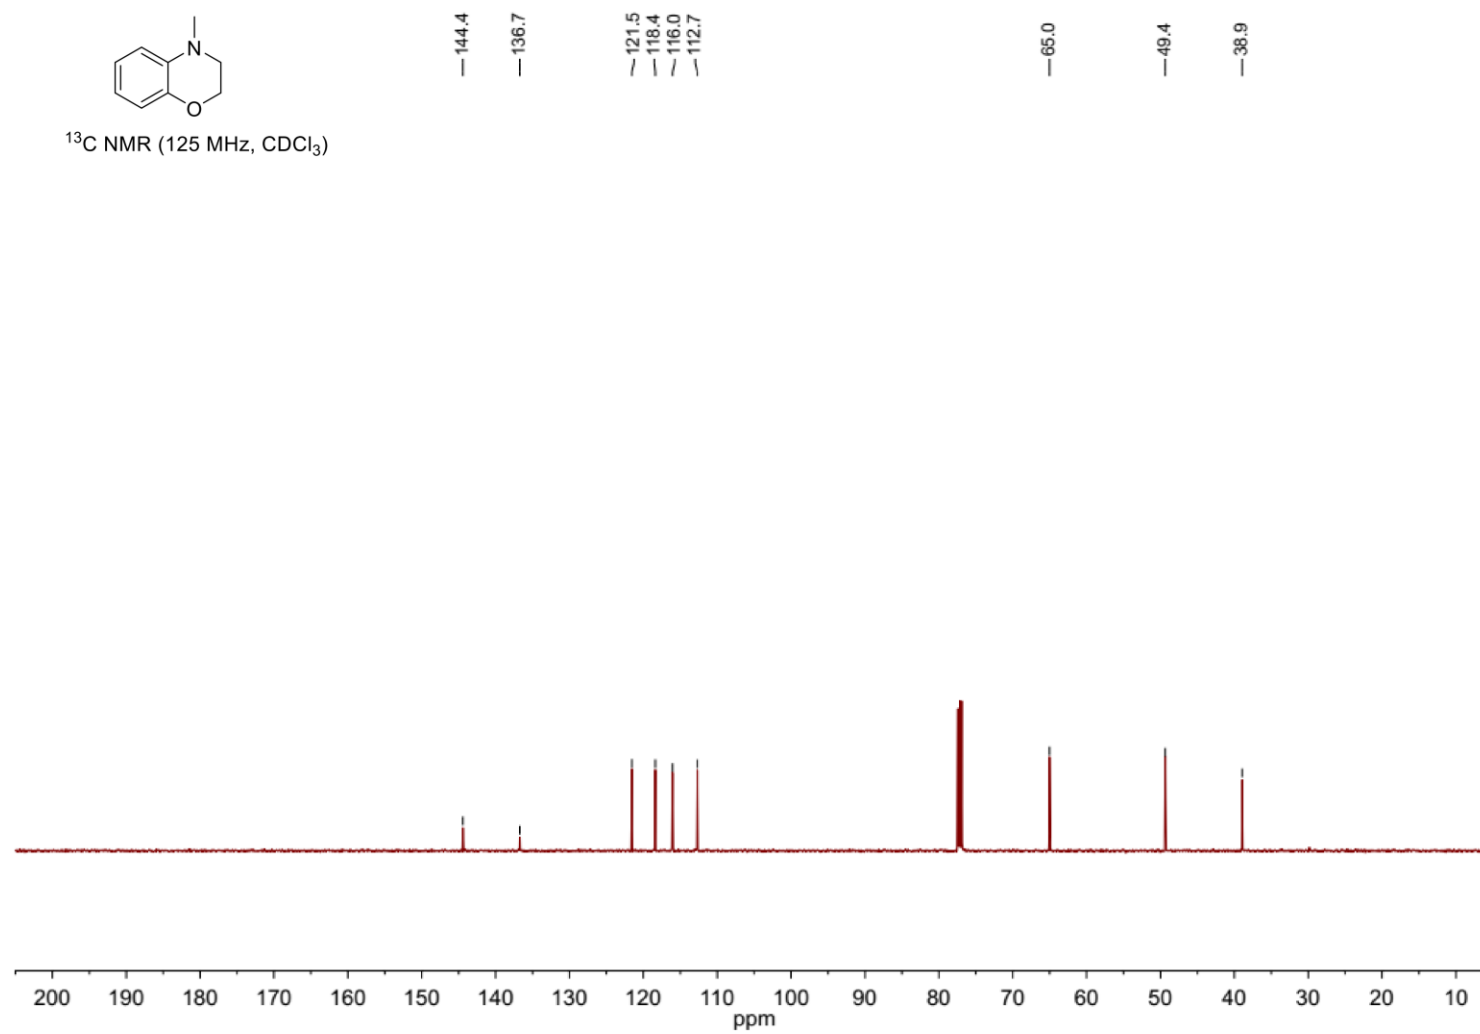

[Go back to table of contents](#)

# 1-Cyclohexylindoline (39)

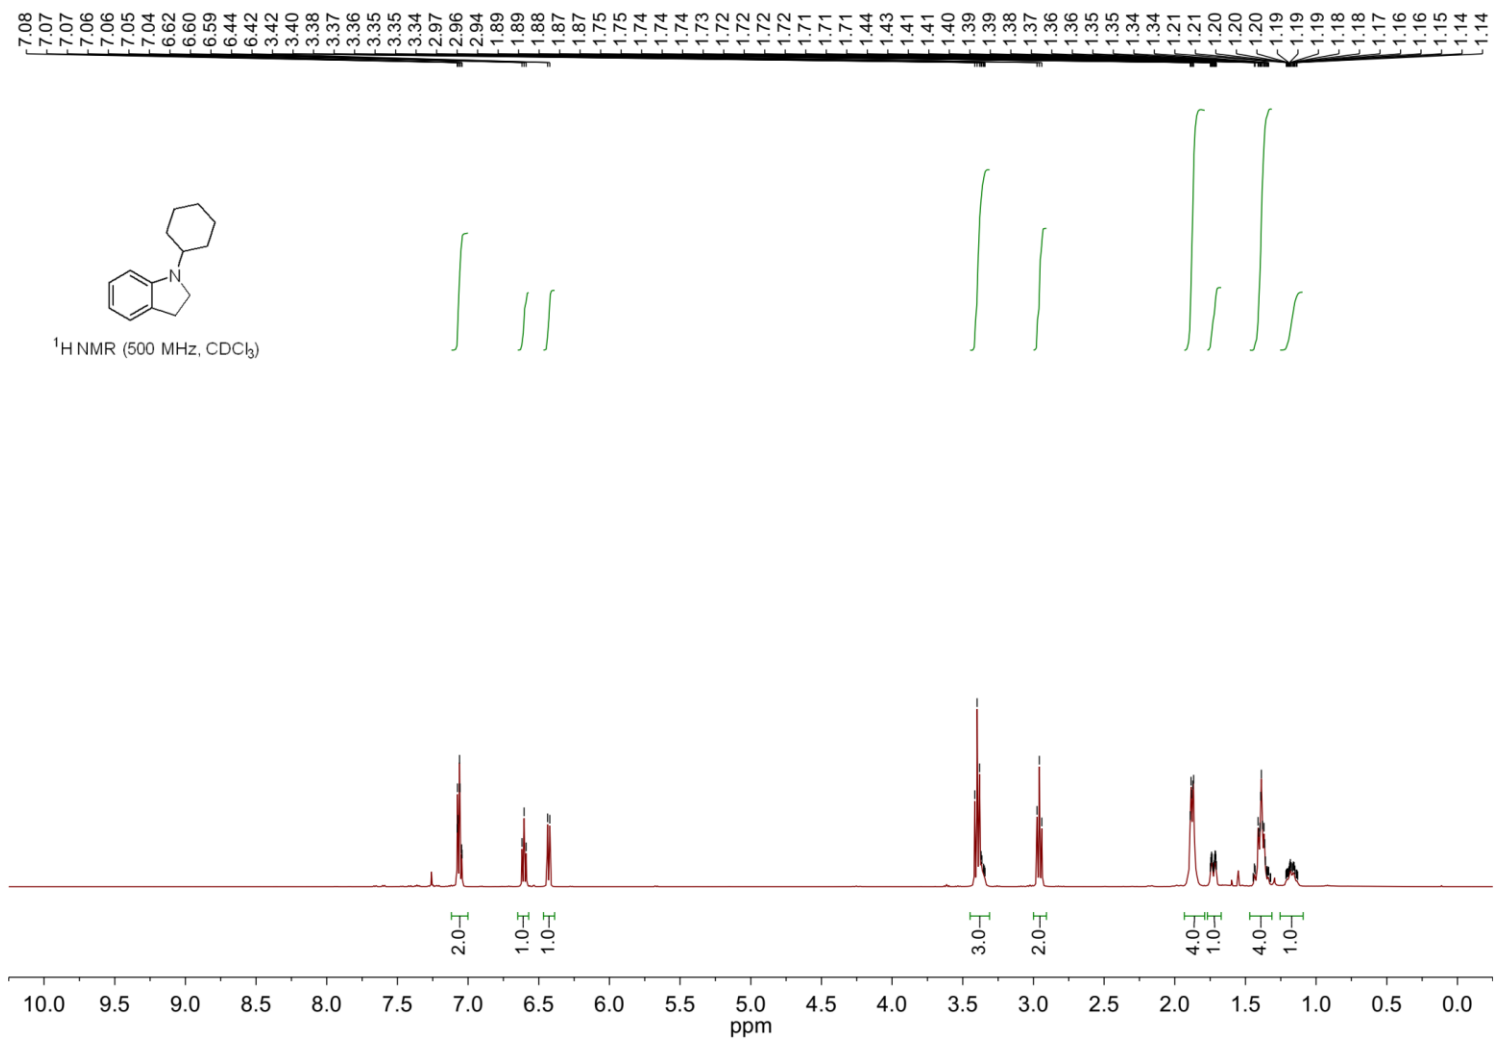

[Go back to table of contents](#)

# 1-Cyclohexylindoline (39)

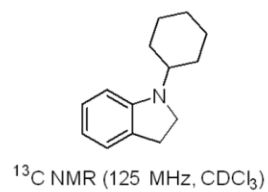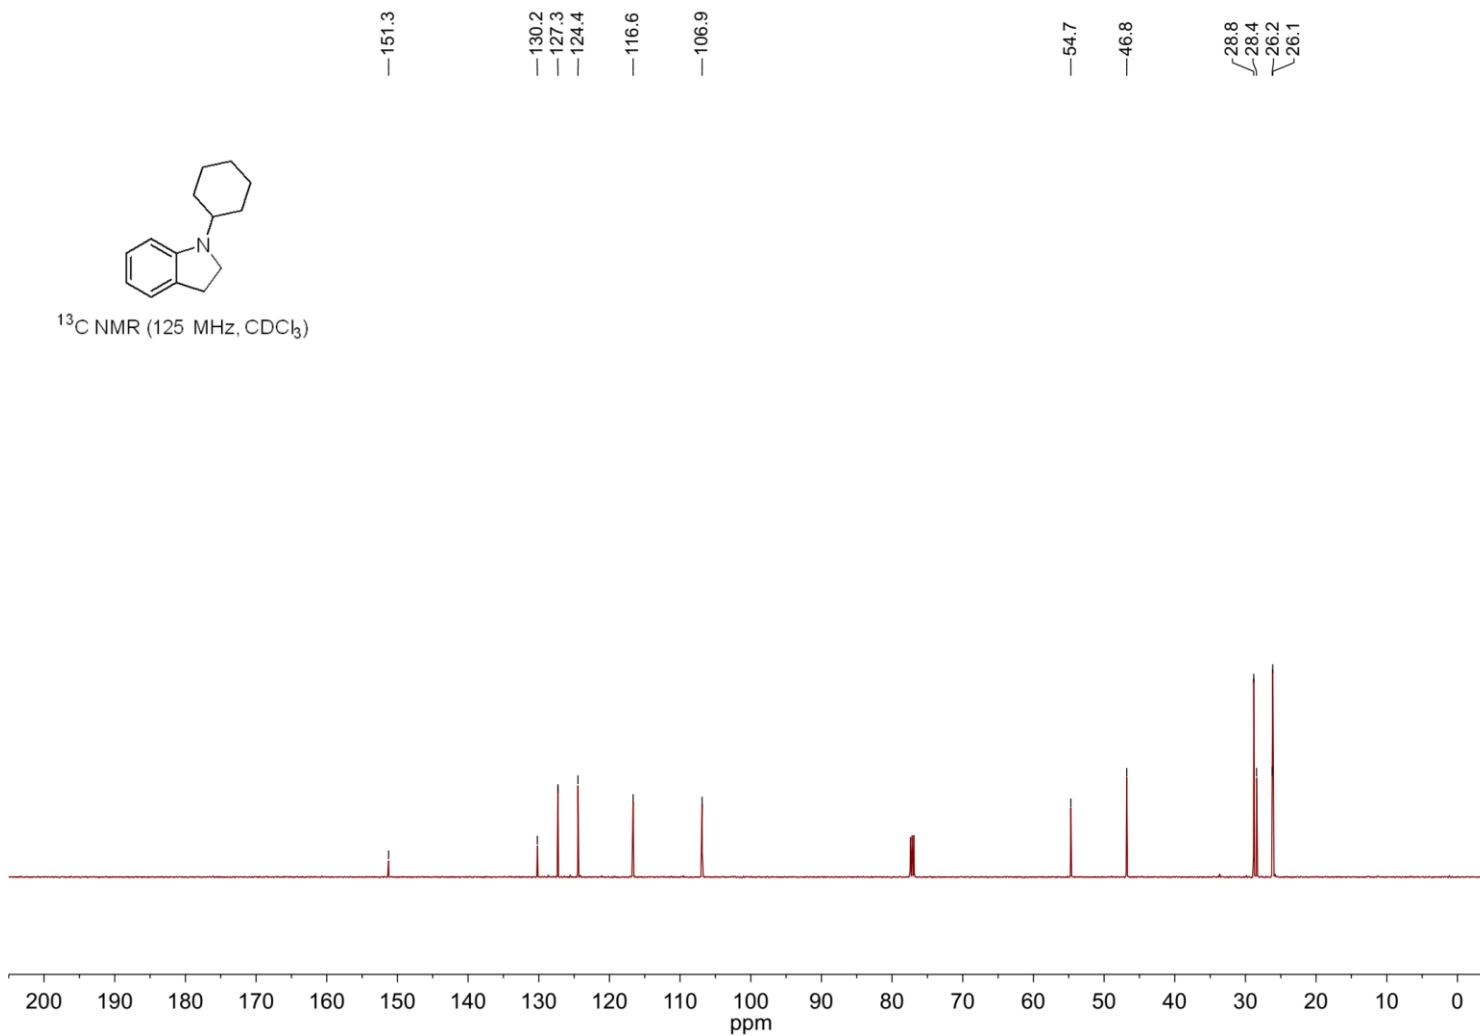

### 4-Cyclohexyl-3,4-dihydro-2H-benzo[b][1,4]oxazine (40)

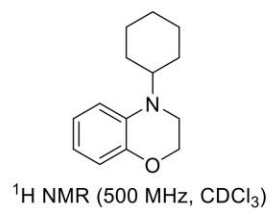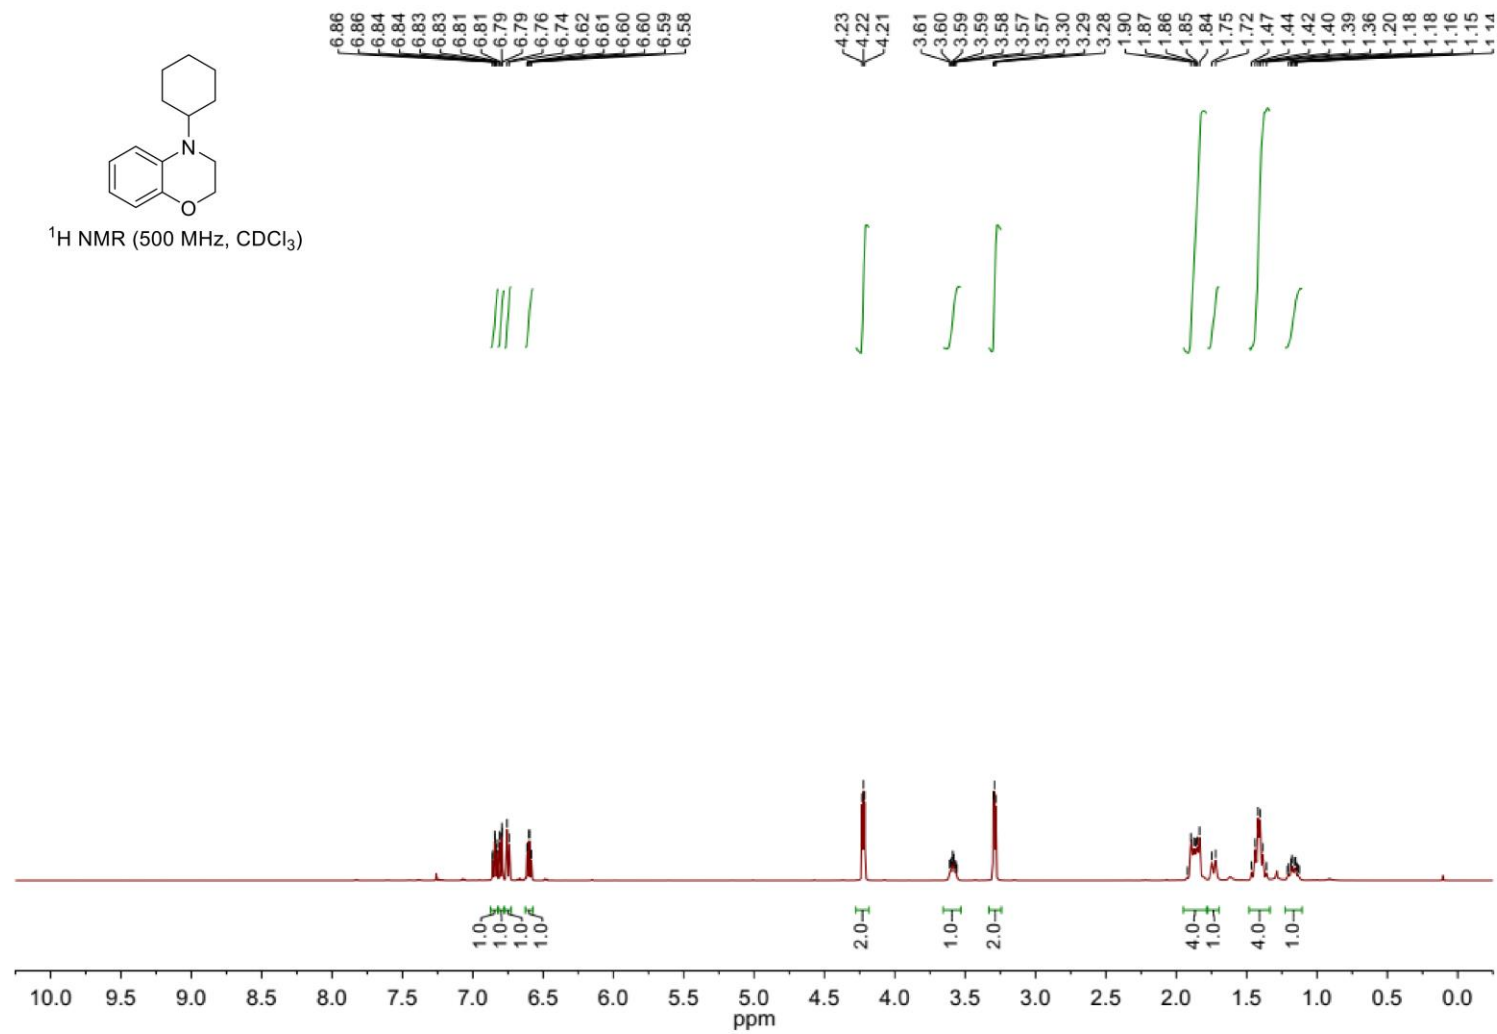

### 4-Cyclohexyl-3,4-dihydro-2H-benzo[*b*][1,4]oxazine (40)

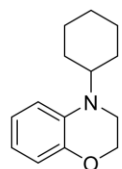

<sup>13</sup>C NMR (125 MHz, CDCl<sub>3</sub>)

— 144.4  
— 135.1  
— 121.6  
— 116.9  
— 116.6  
— 112.1  
  
— 65.2  
— 55.9  
— 40.2  
— 29.2  
— 26.2  
— 26.1

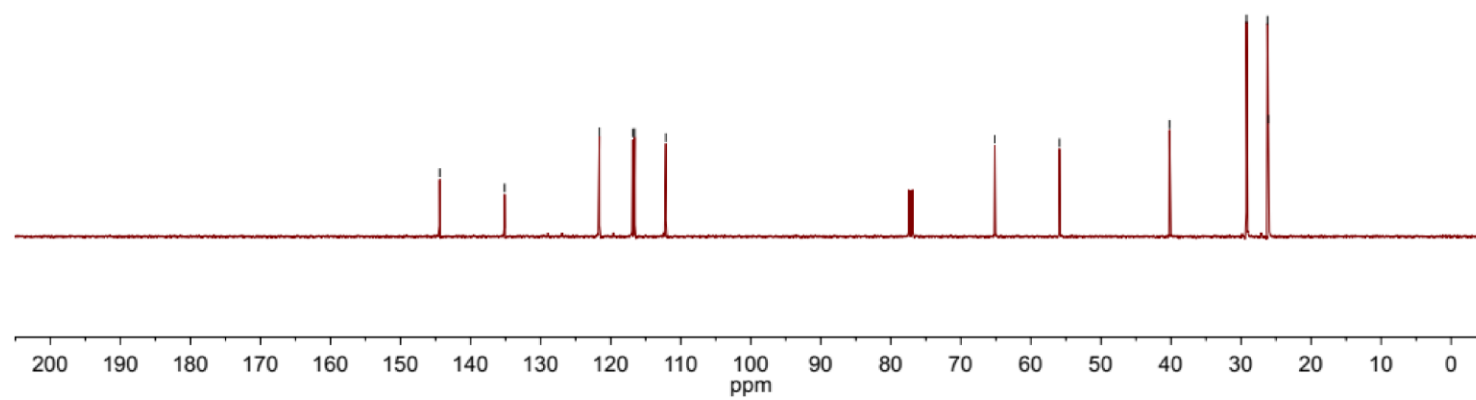

[Go back to table of contents](#)



### 4-Methyl-N-(4-phenylbutyl)-N-(*p*-tolyl)aniline (41)

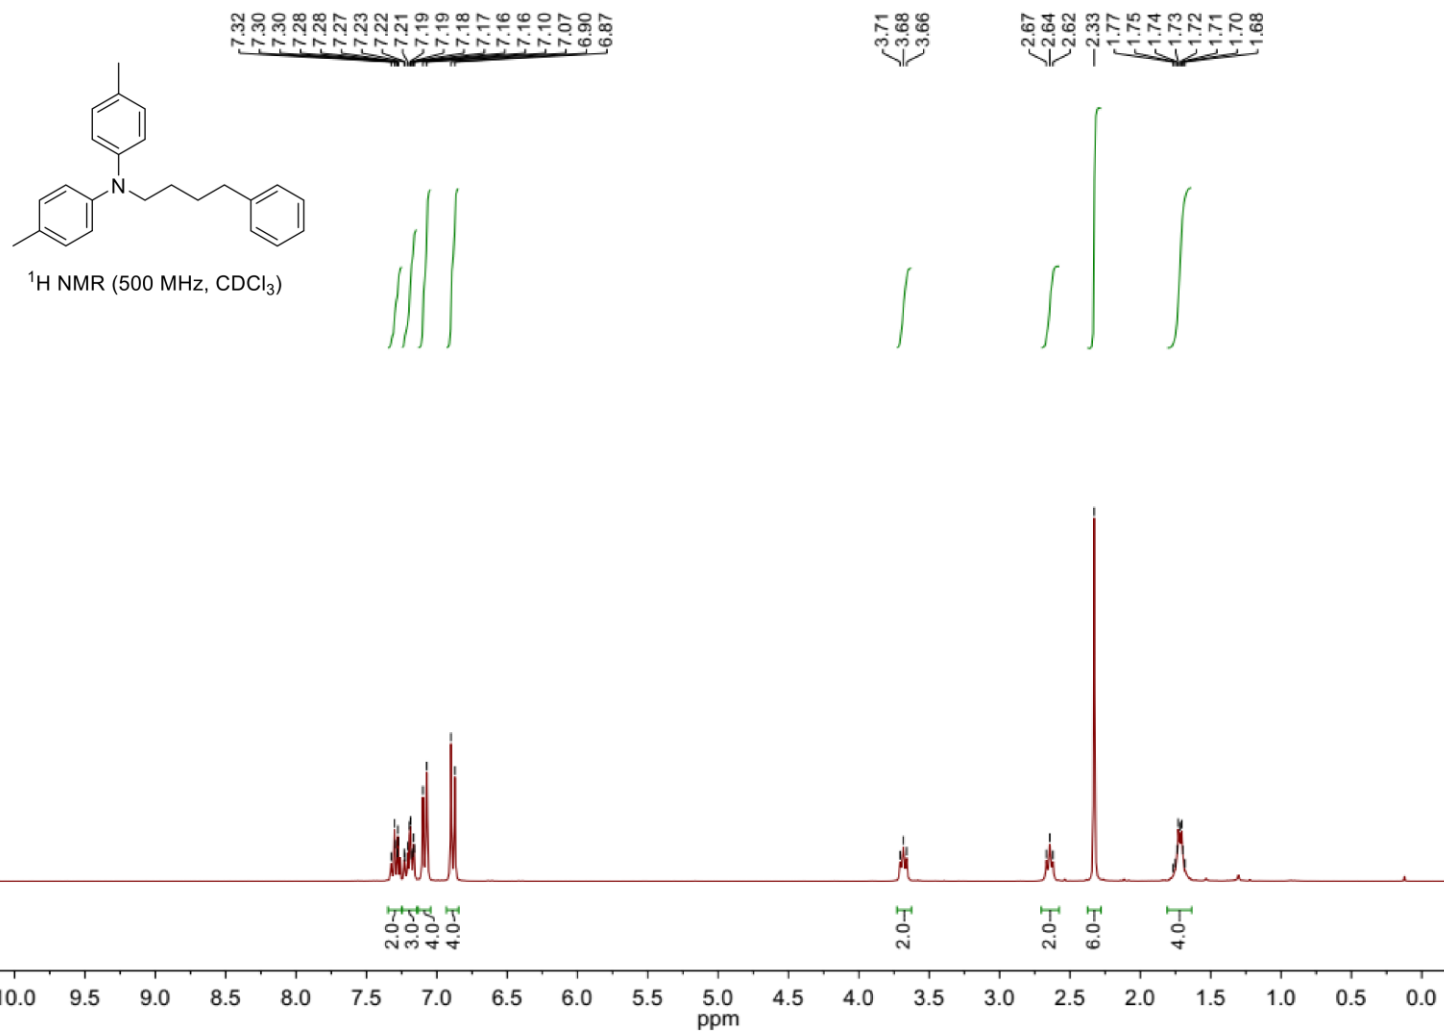

### 4-Methyl-N-(4-phenylbutyl)-N-(*p*-tolyl)aniline (41)

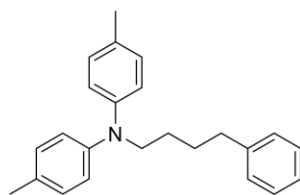

<sup>13</sup>C NMR (125 MHz, CDCl<sub>3</sub>)

— 146.1  
— 142.5  
— 130.4  
— 129.9  
— 128.5  
— 128.4  
— 125.9  
— 121.0  
— 52.4  
— 35.8  
— 29.1  
— 27.3  
— 20.8

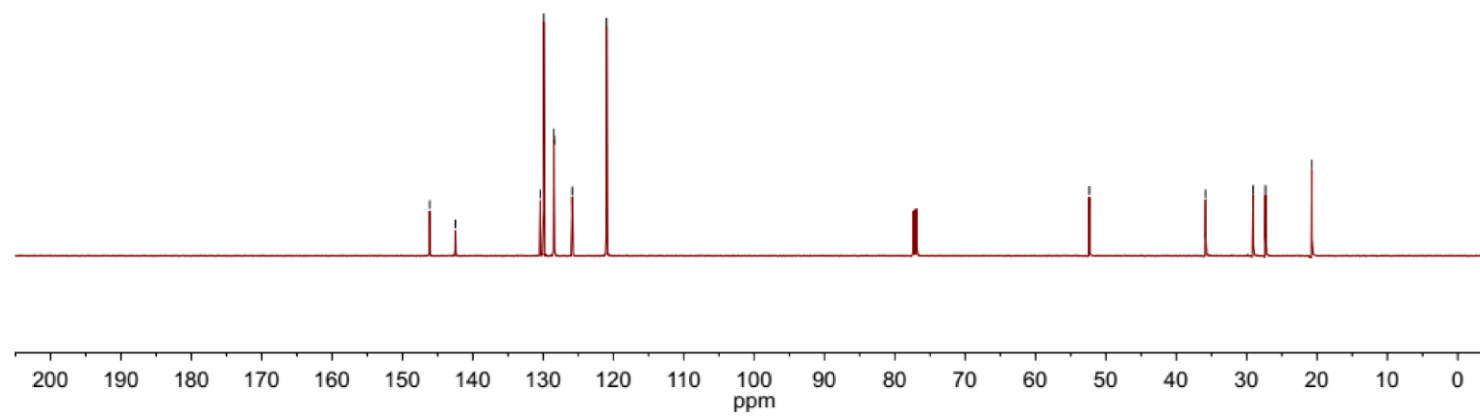

[Go back to table of contents](#)

### Methyl 5-(di-*p*-tolylamino)pentanoate (42)

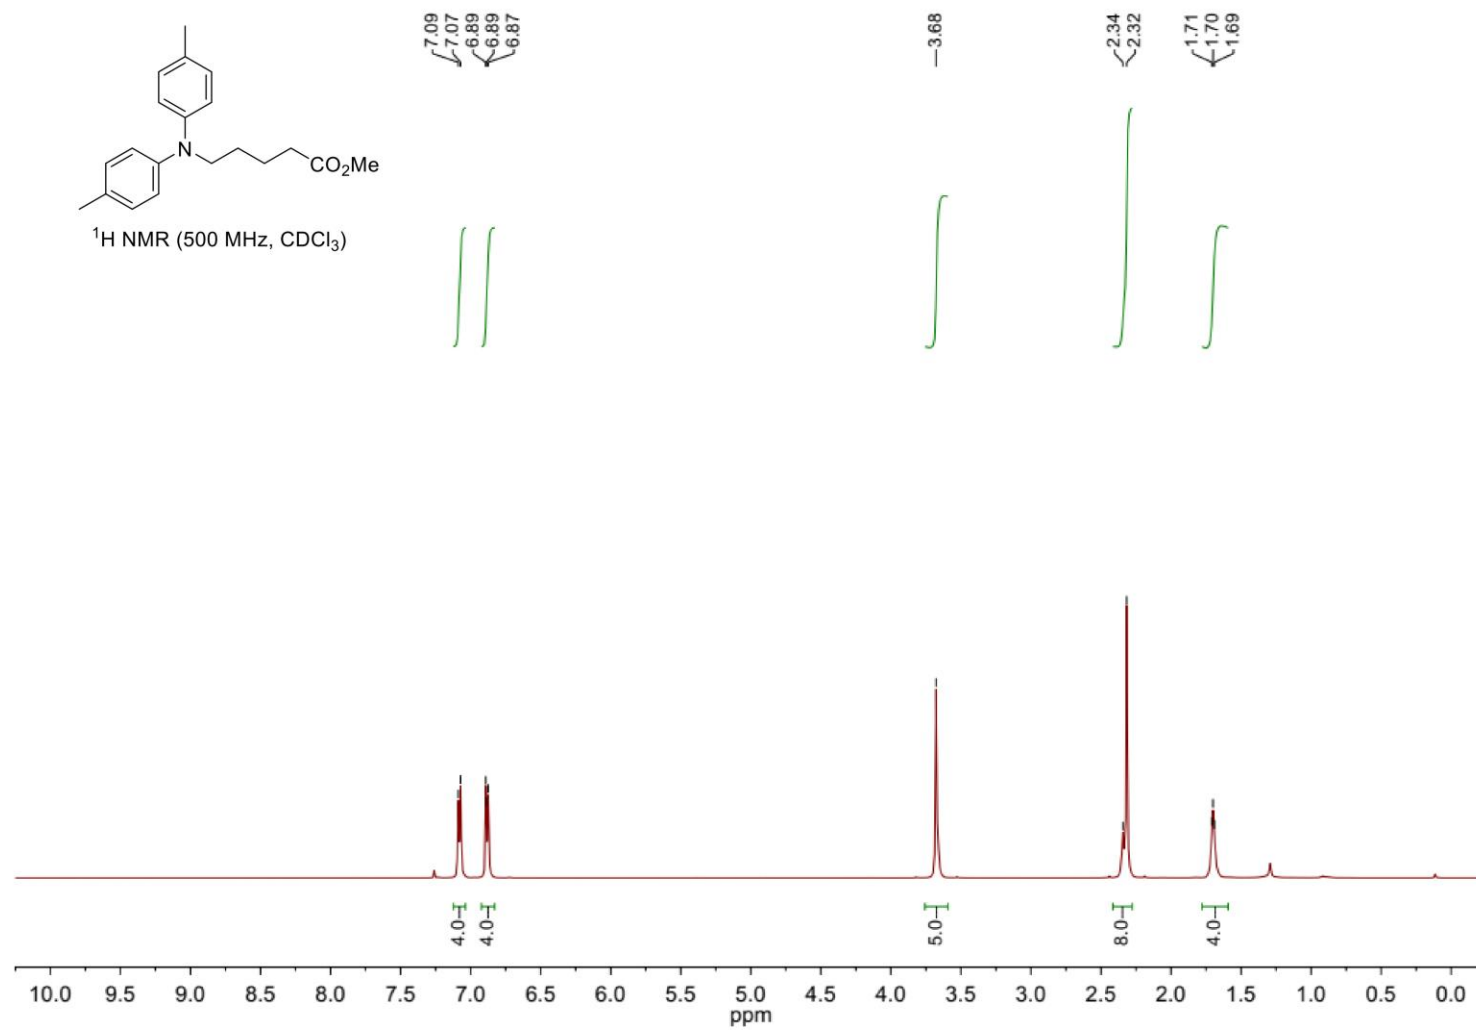

[Go back to table of contents](#)

### Methyl 5-(di-*p*-tolylamino)pentanoate (42)

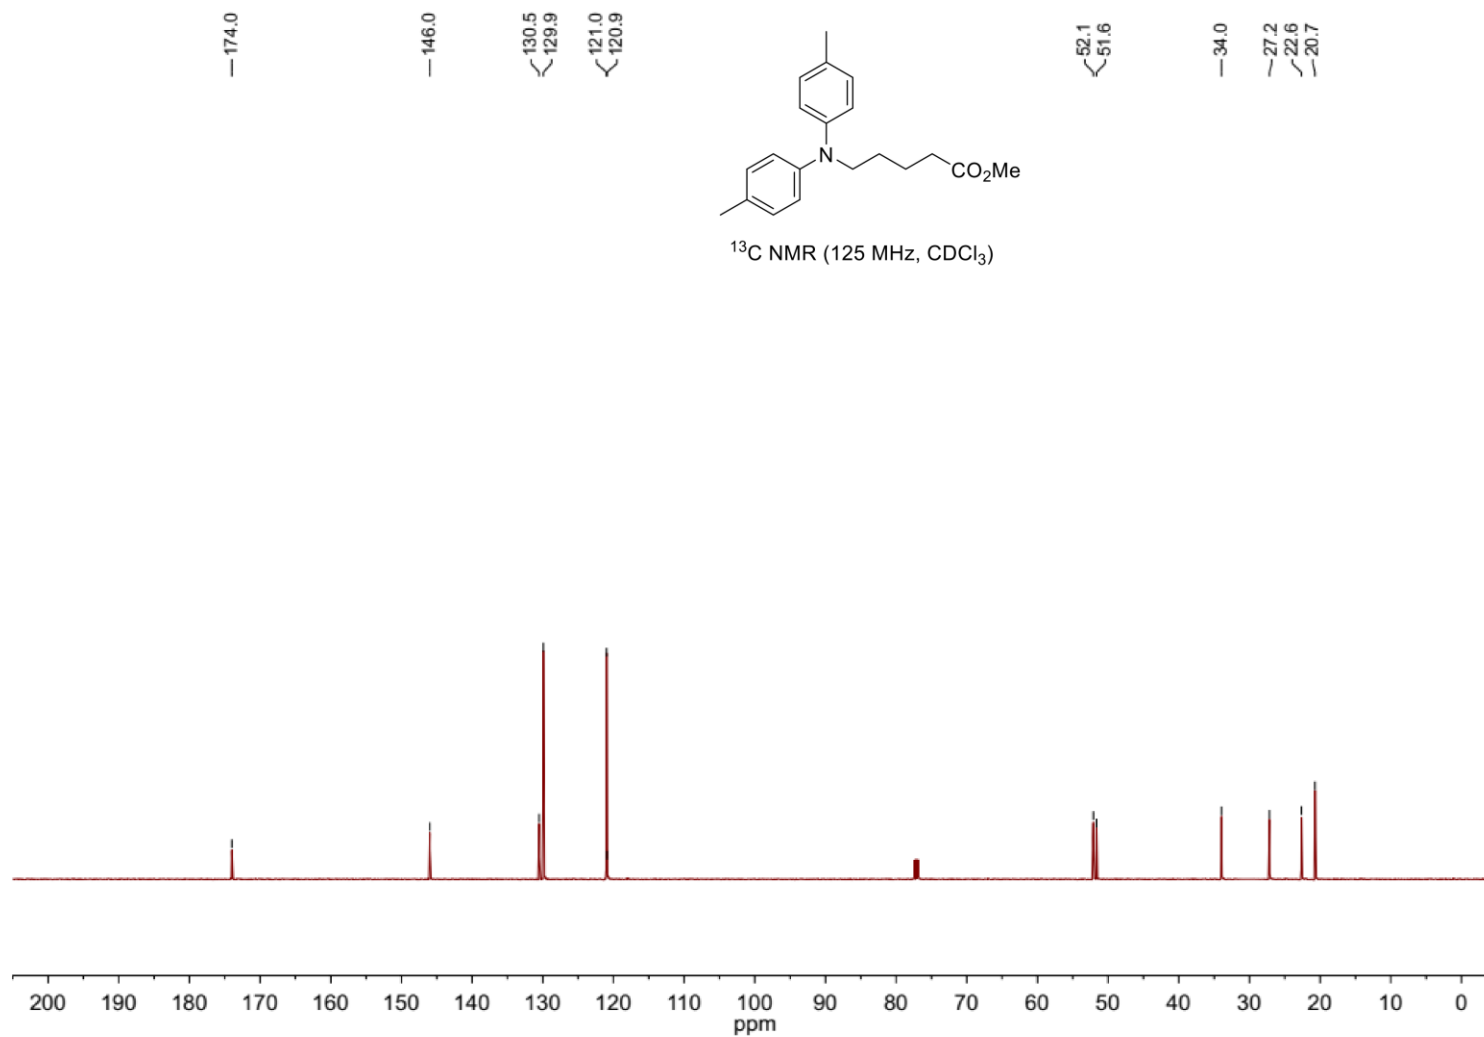

[Go back to table of contents](#)

4-(*tert*-Butyl)-*N*-(4-(*tert*-butyl)phenyl)-*N*-(3,4-dimethoxyphenethyl)aniline (43)

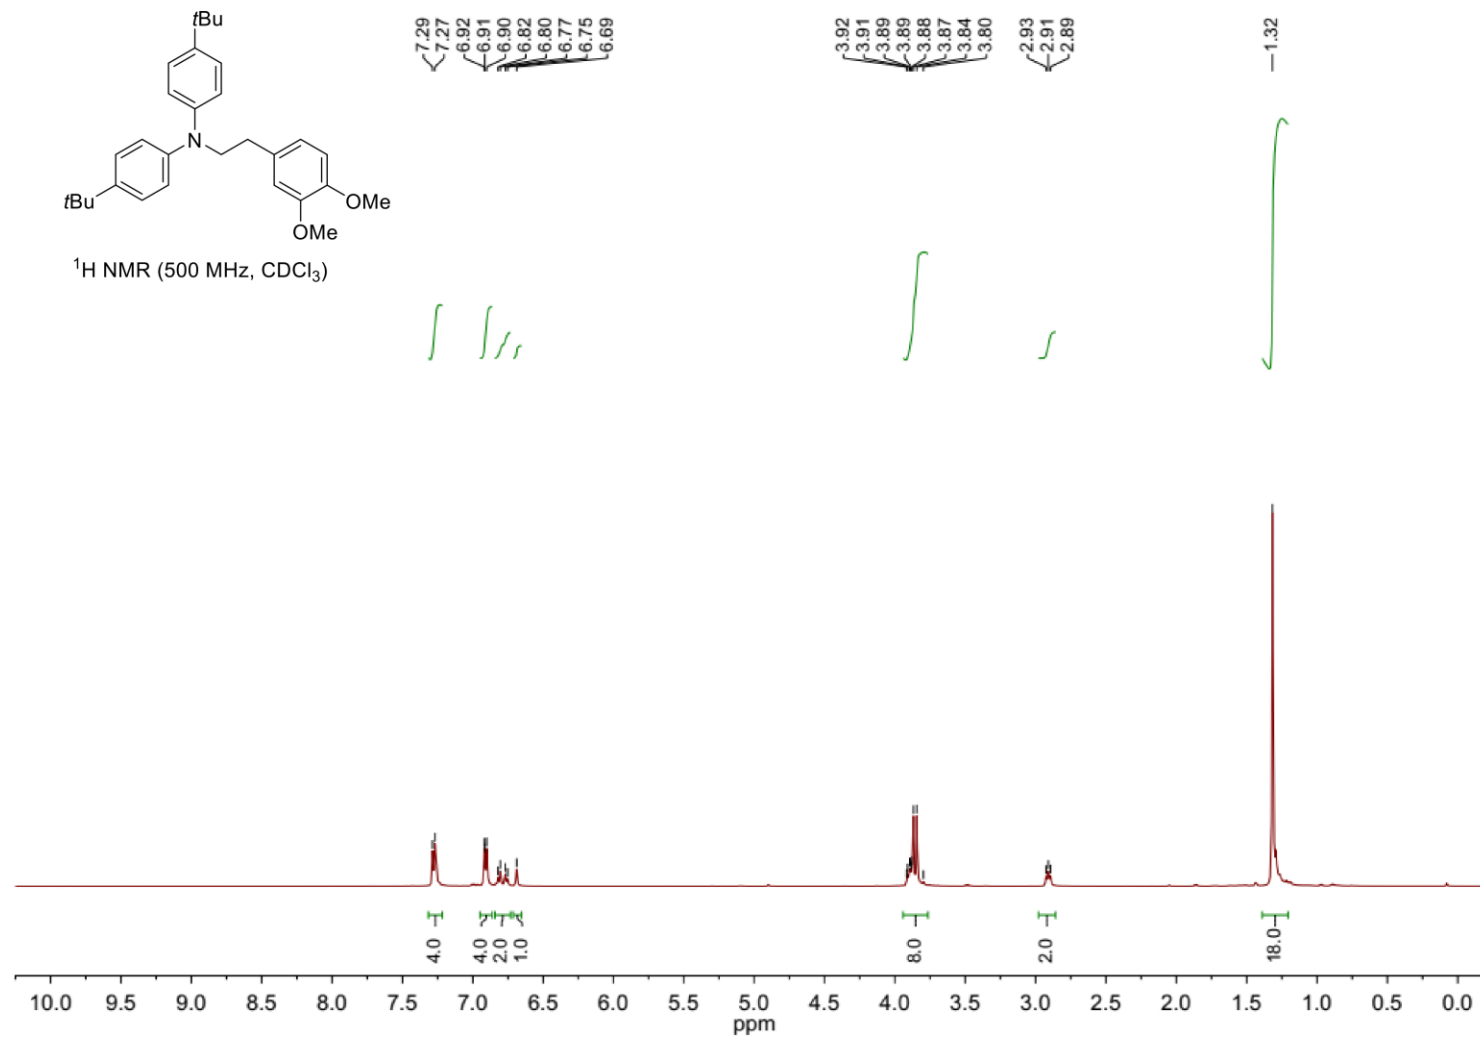

**4-(*tert*-Butyl)-*N*-(4-(*tert*-butyl)phenyl)-*N*-(3,4-dimethoxyphenethyl)aniline (43)**

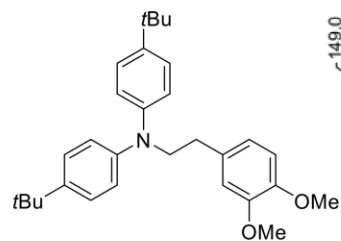

<sup>13</sup>C NMR (125 MHz, CDCl<sub>3</sub>)

149.0  
147.6  
145.4  
144.0  
132.5  
126.2  
120.8  
120.5  
112.3  
111.5

56.1  
56.0  
54.2

34.3  
33.5  
31.6

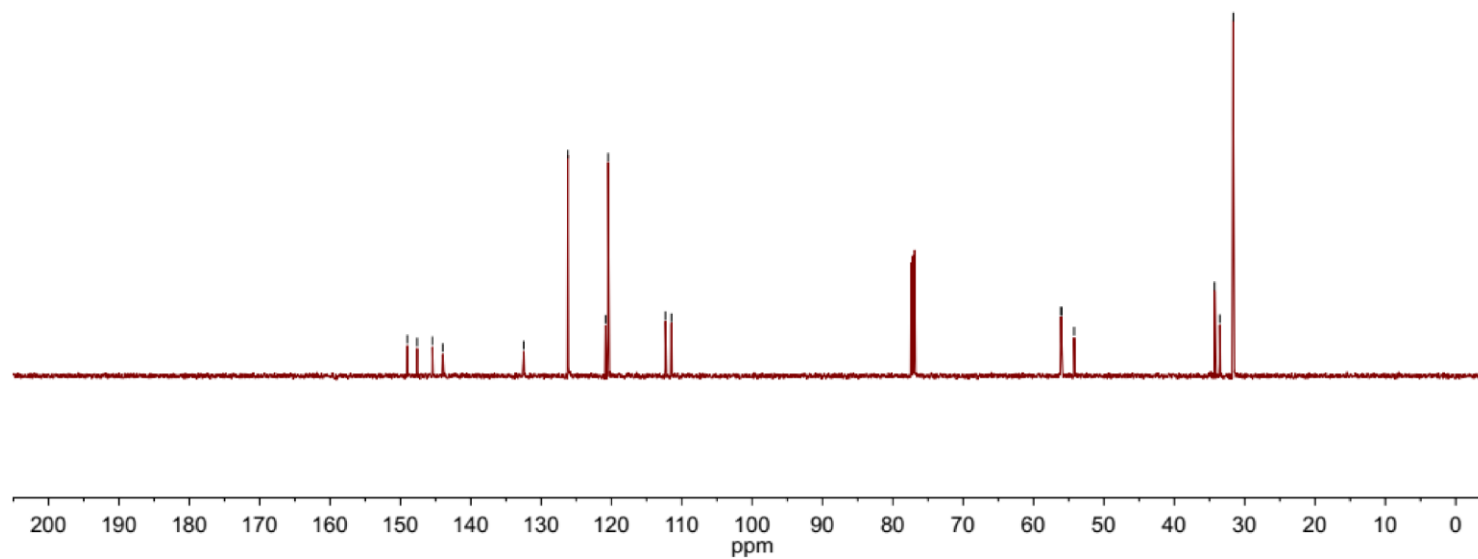

[Go back to table of contents](#)

***N*-[3-(1*H*-Indol-3-yl)propyl]-4-methoxy-*N'*-(4-methoxyphenyl)aniline (44)**

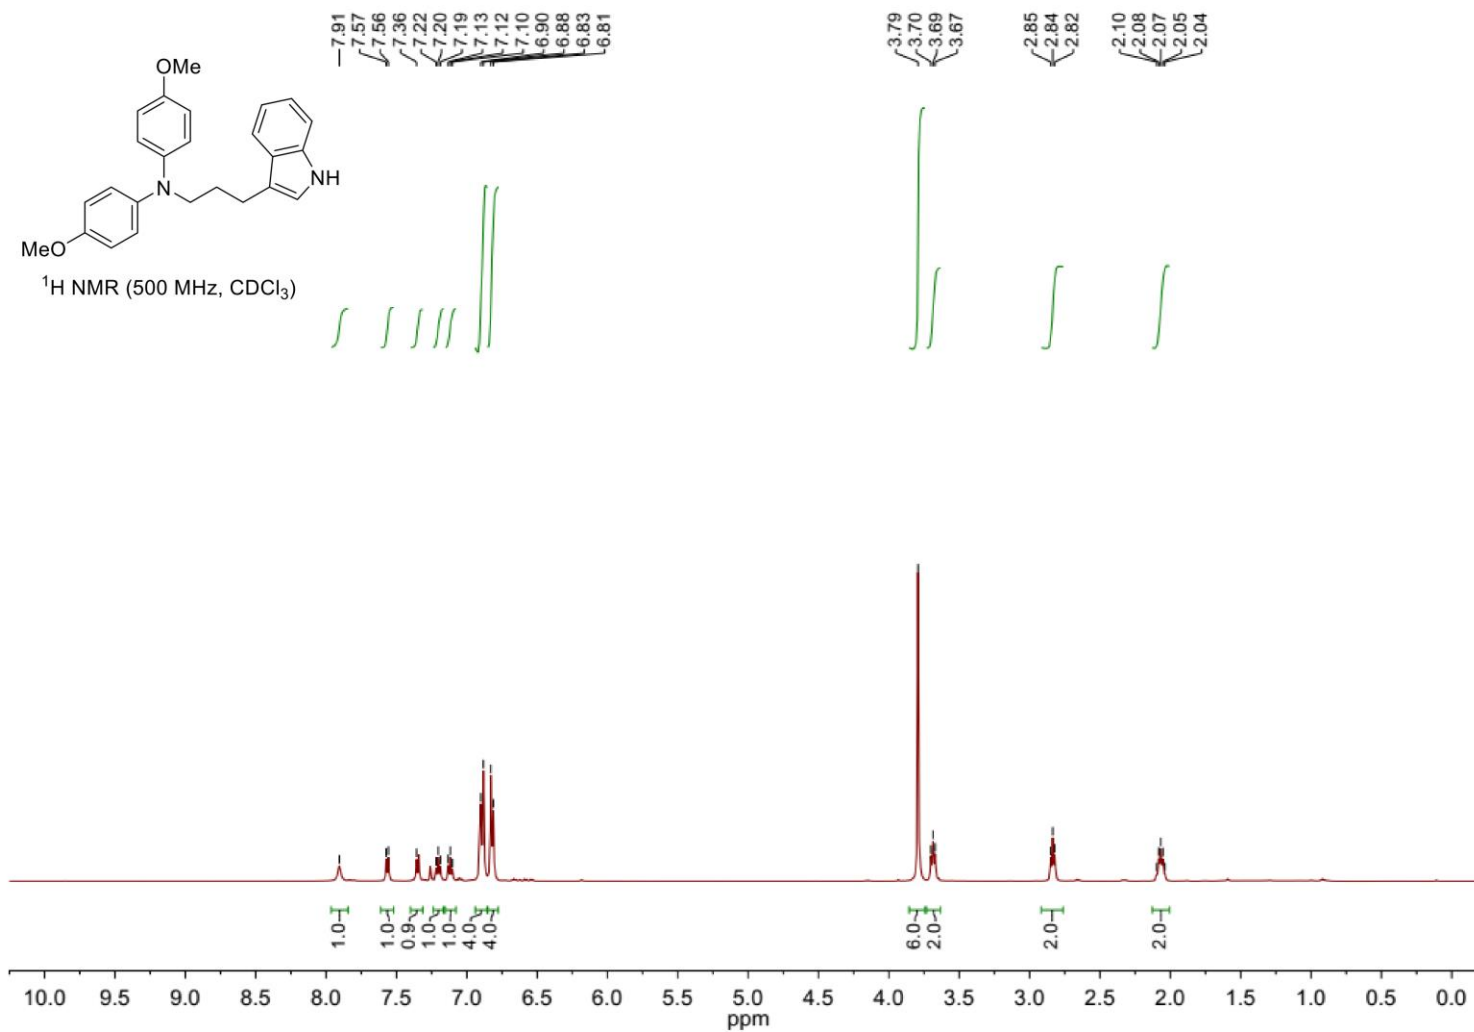

***N*-(3-(1*H*-Indol-3-yl)propyl)-4-methoxy-*N*-(4-methoxyphenyl)aniline (44)**

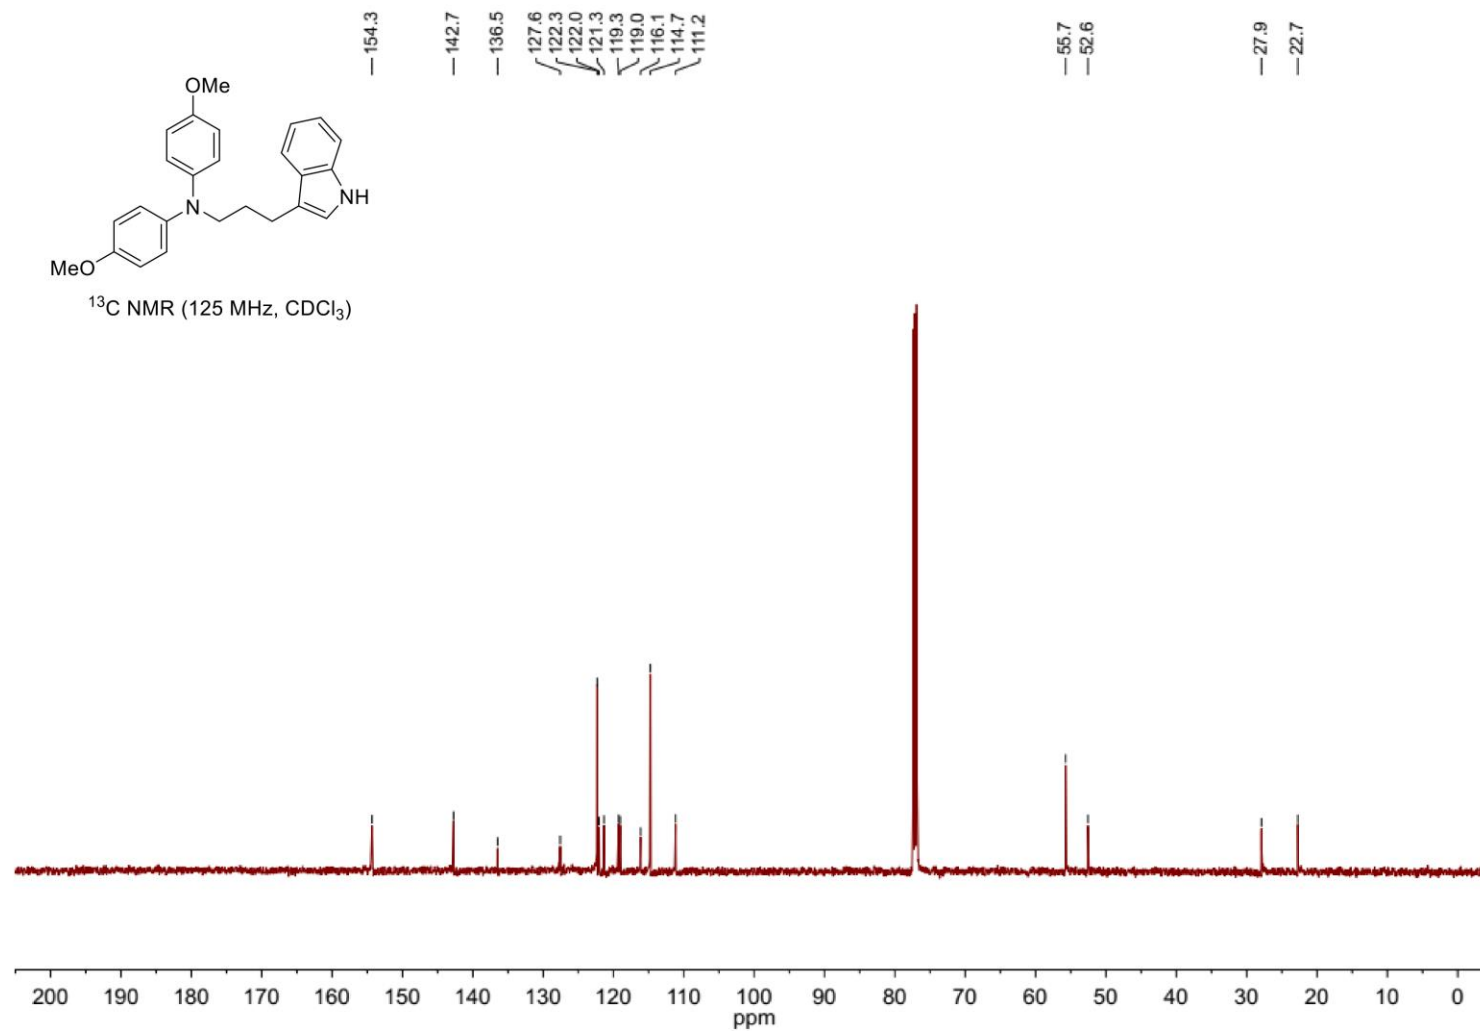



4-(2-Phenylpropan-2-yl)-N-(4-(2-phenylpropan-2-yl)phenyl)-N-(3,3,3-trifluoropropyl)aniline (45)

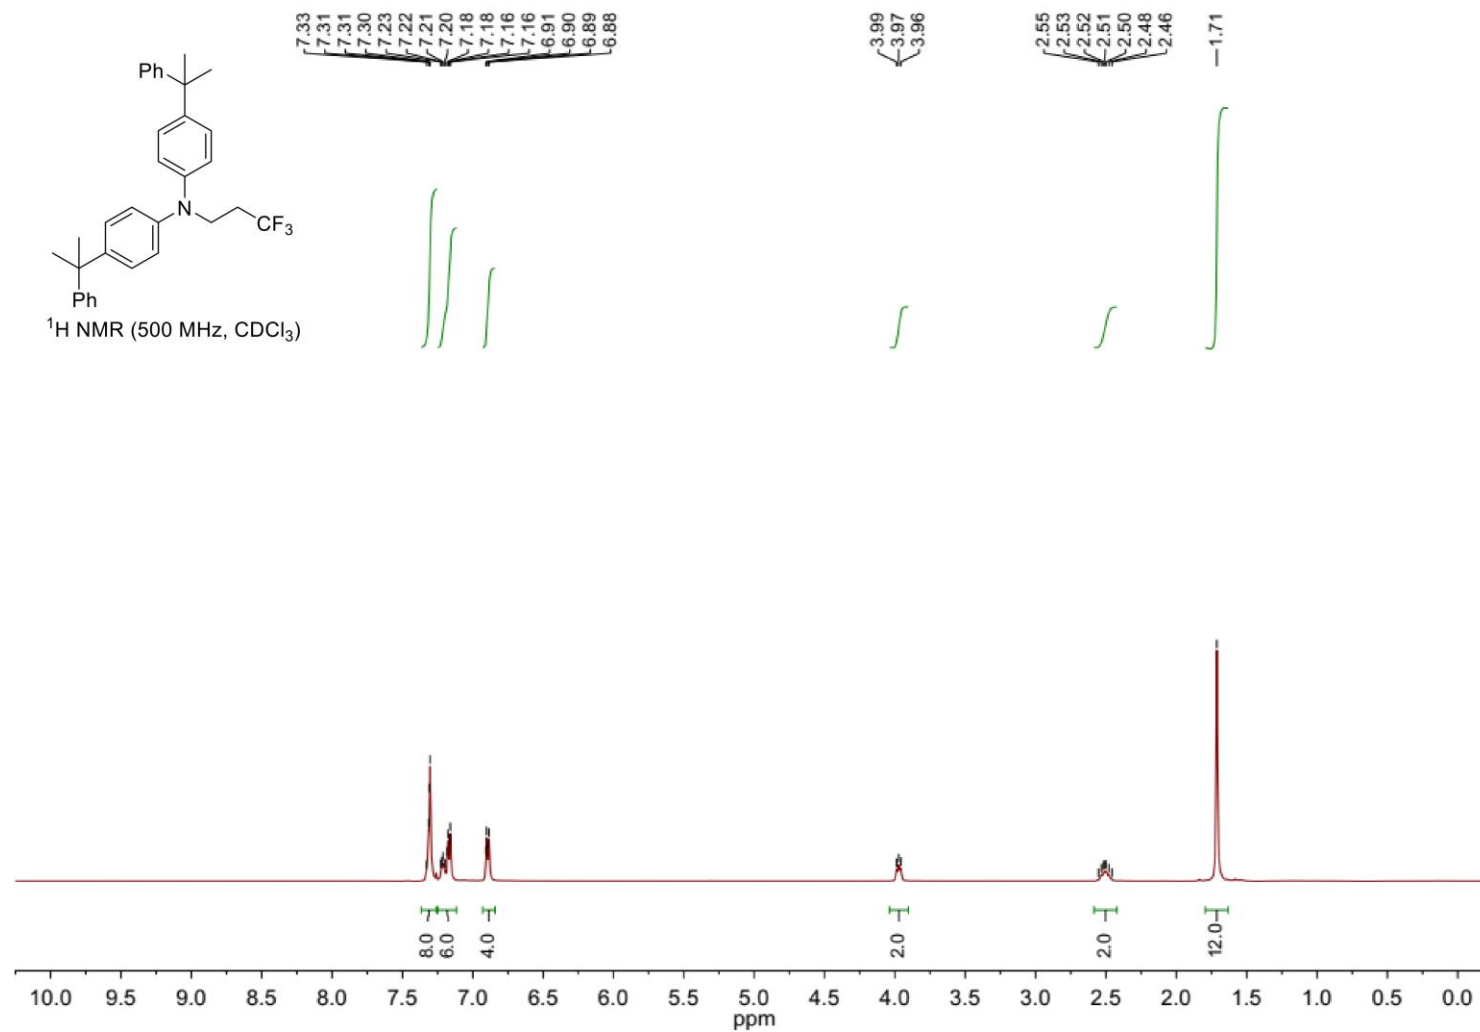

### 4-(2-Phenylpropan-2-yl)-N-(4-(2-phenylpropan-2-yl)phenyl)-N-(3,3,3-trifluoropropyl)aniline (45)

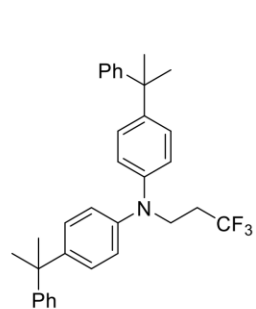

$^{13}\text{C}$  NMR (125 MHz,  $\text{CDCl}_3$ )

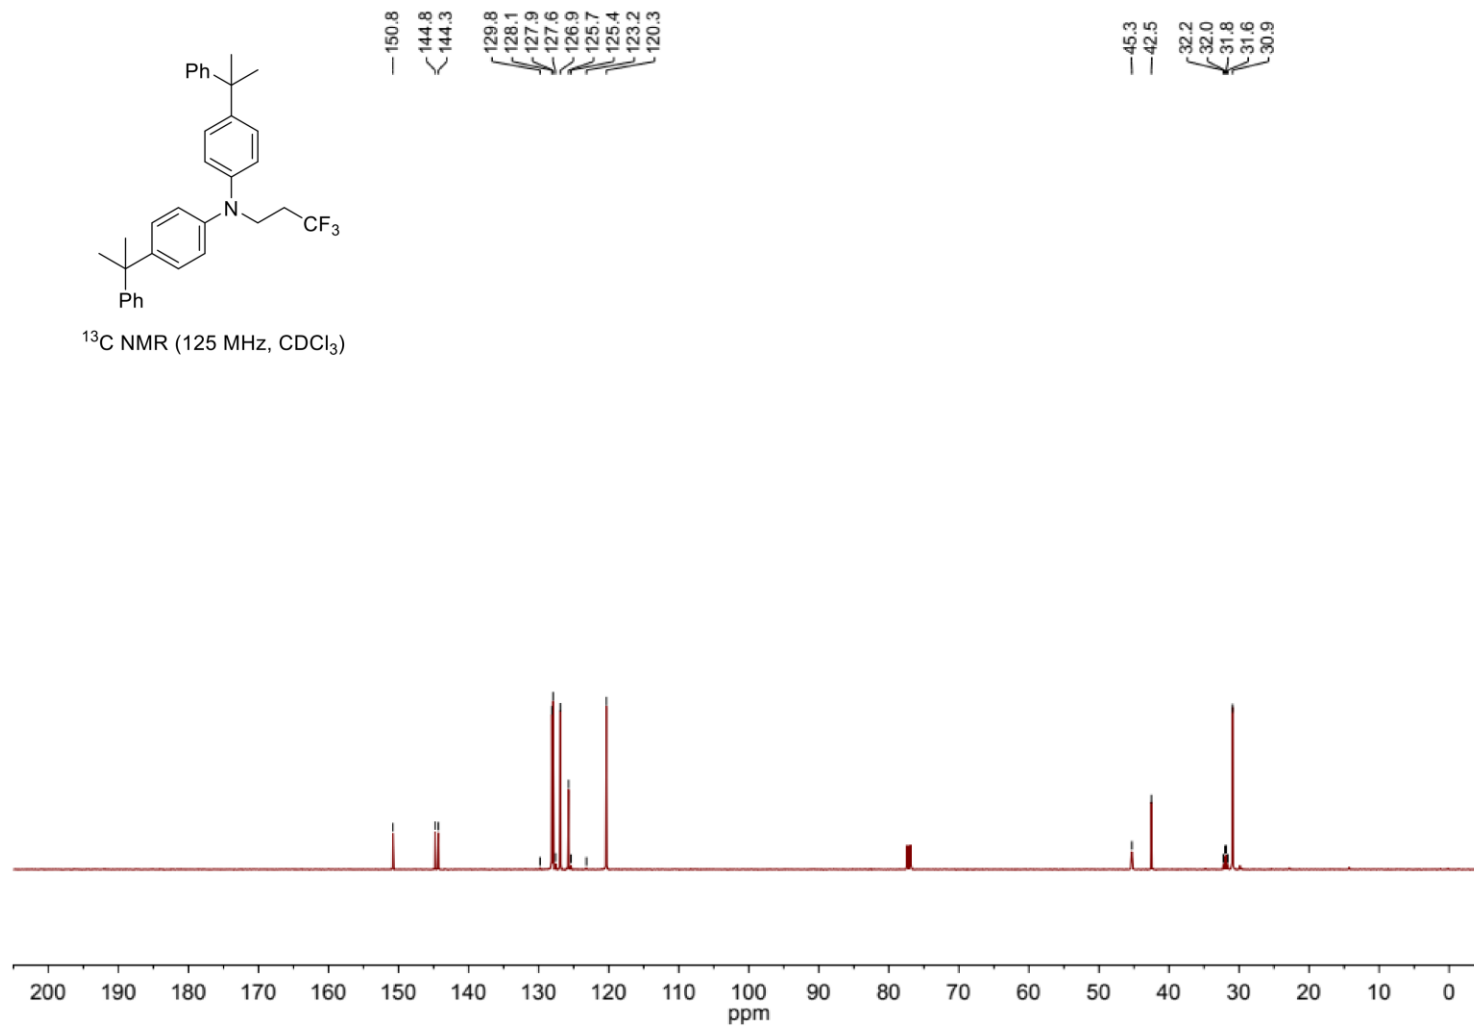

*N,N*-Di-*p*-tolyltetrahydro-2*H*-pyran-4-amine (46)

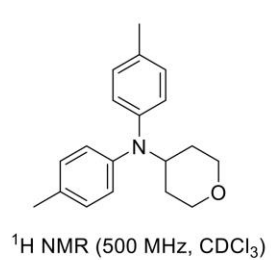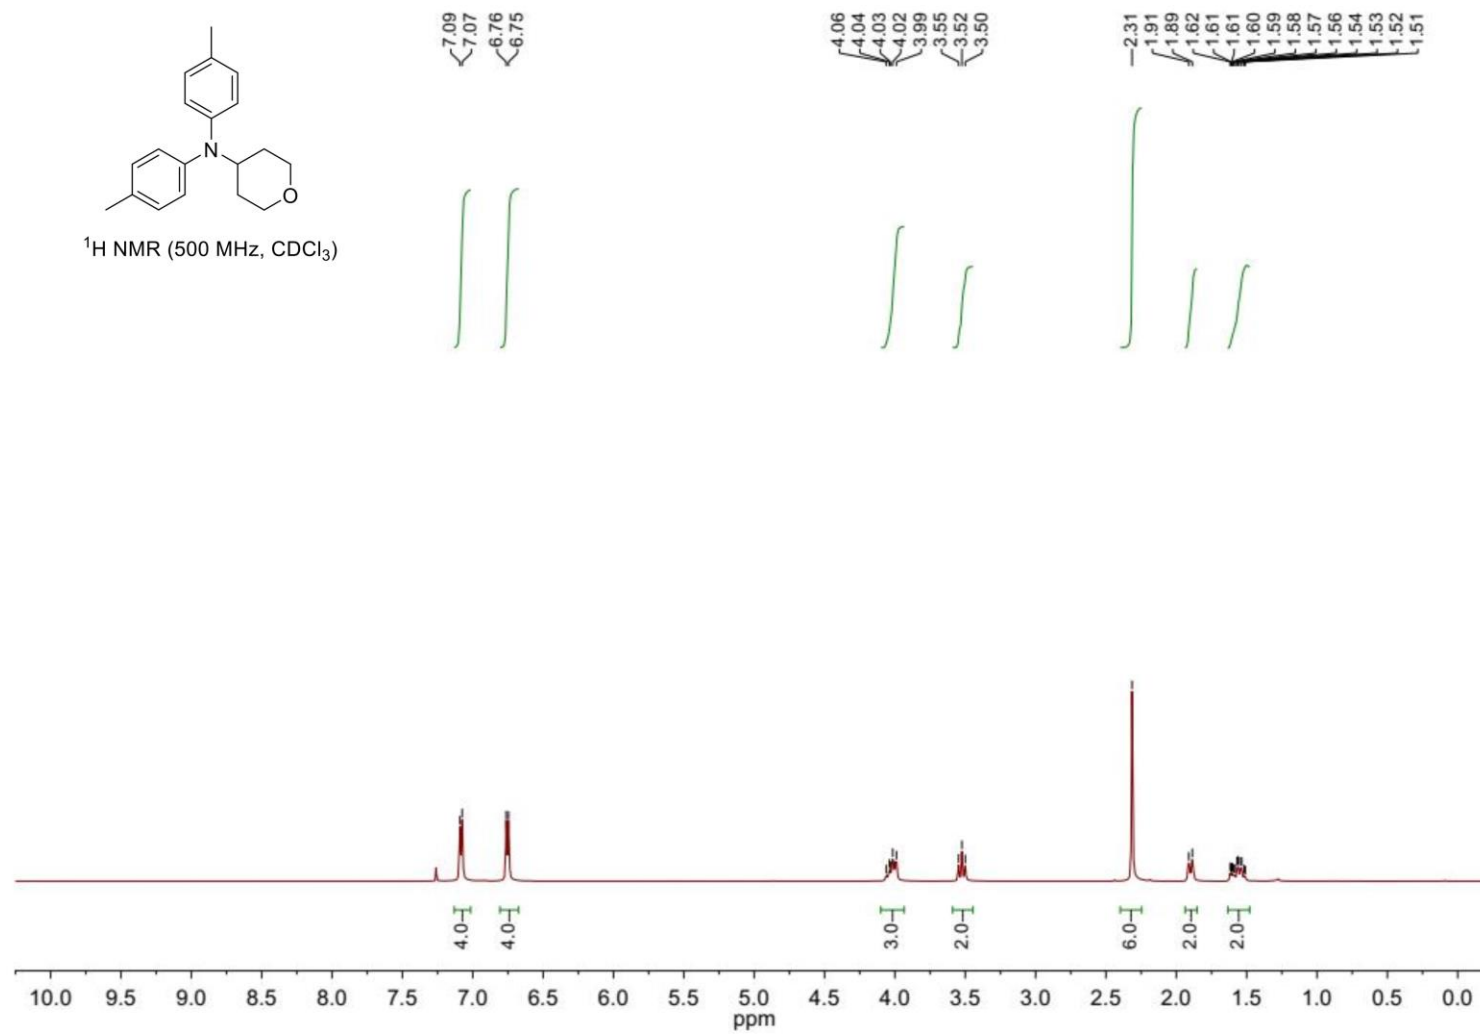

***N,N*-Di-*p*-tolyltetrahydro-2*H*-pyran-4-amine (46)**

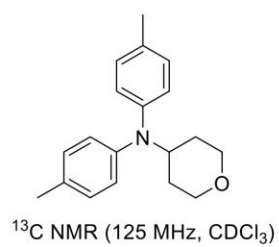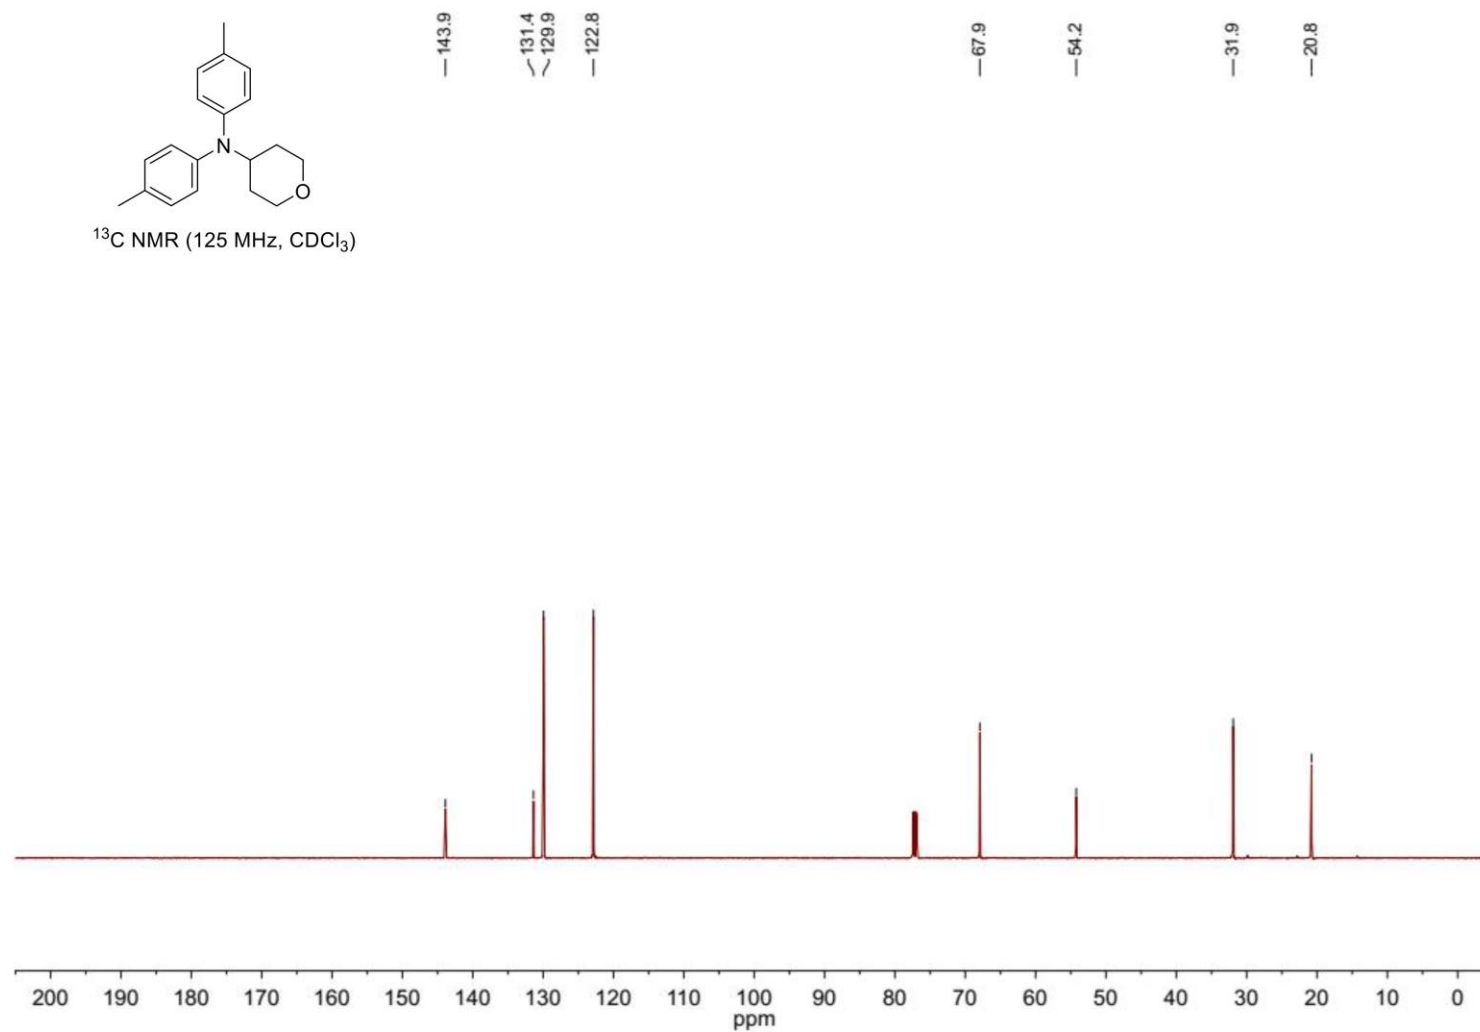

### 4-Methoxy-N-(4-methoxyphenyl)-N-methylaniline (47)

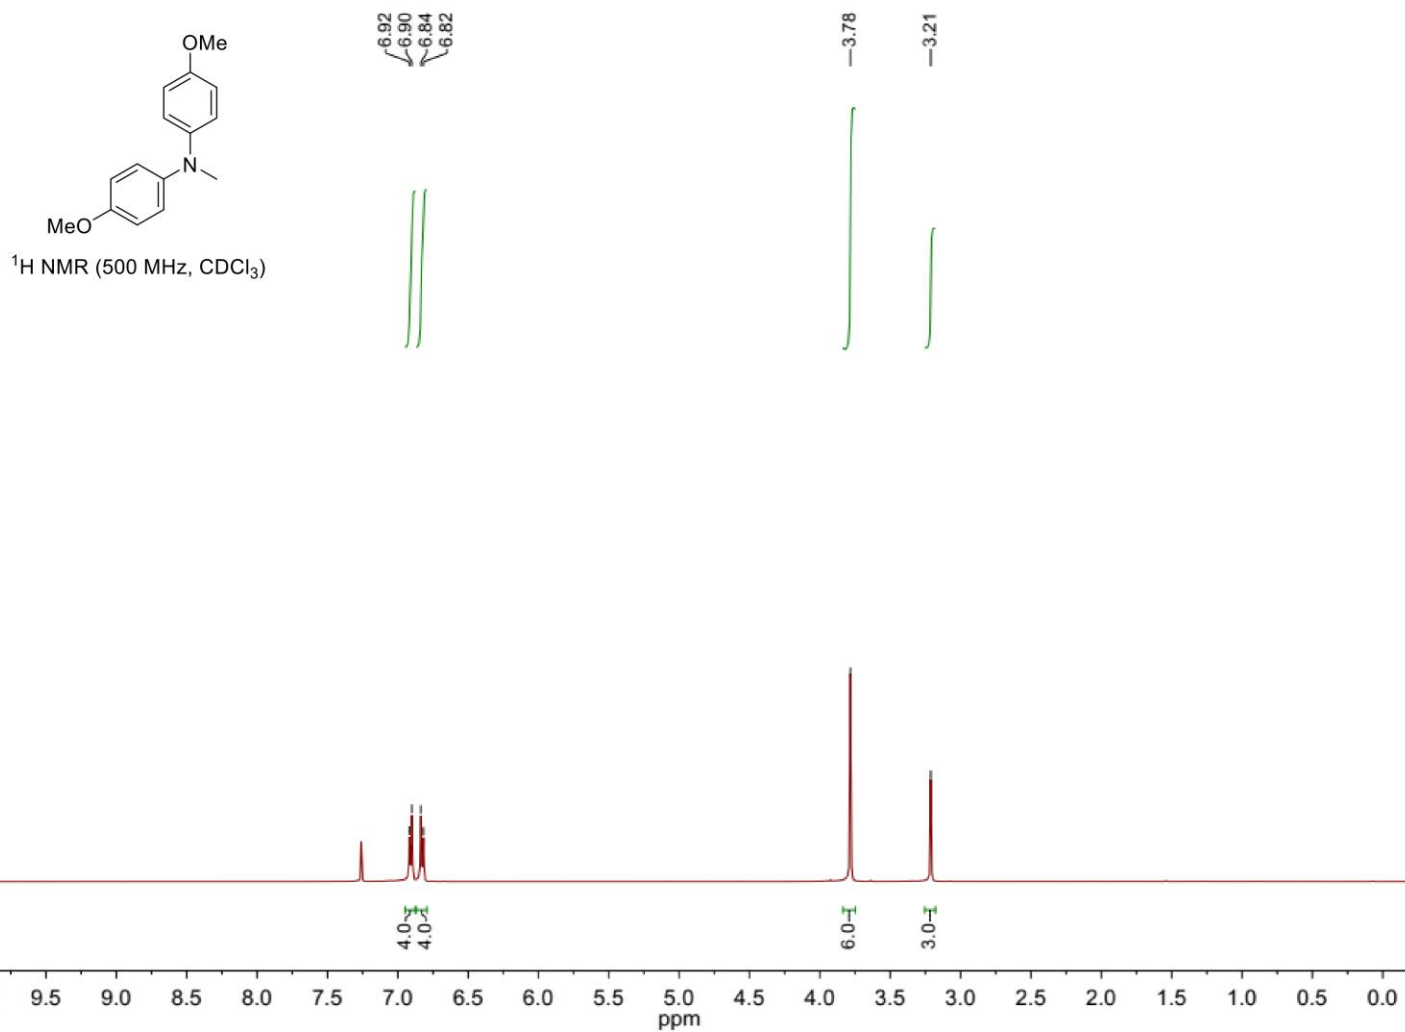

### 4-Methoxy-N-(4-methoxyphenyl)-N-methylaniline (47)

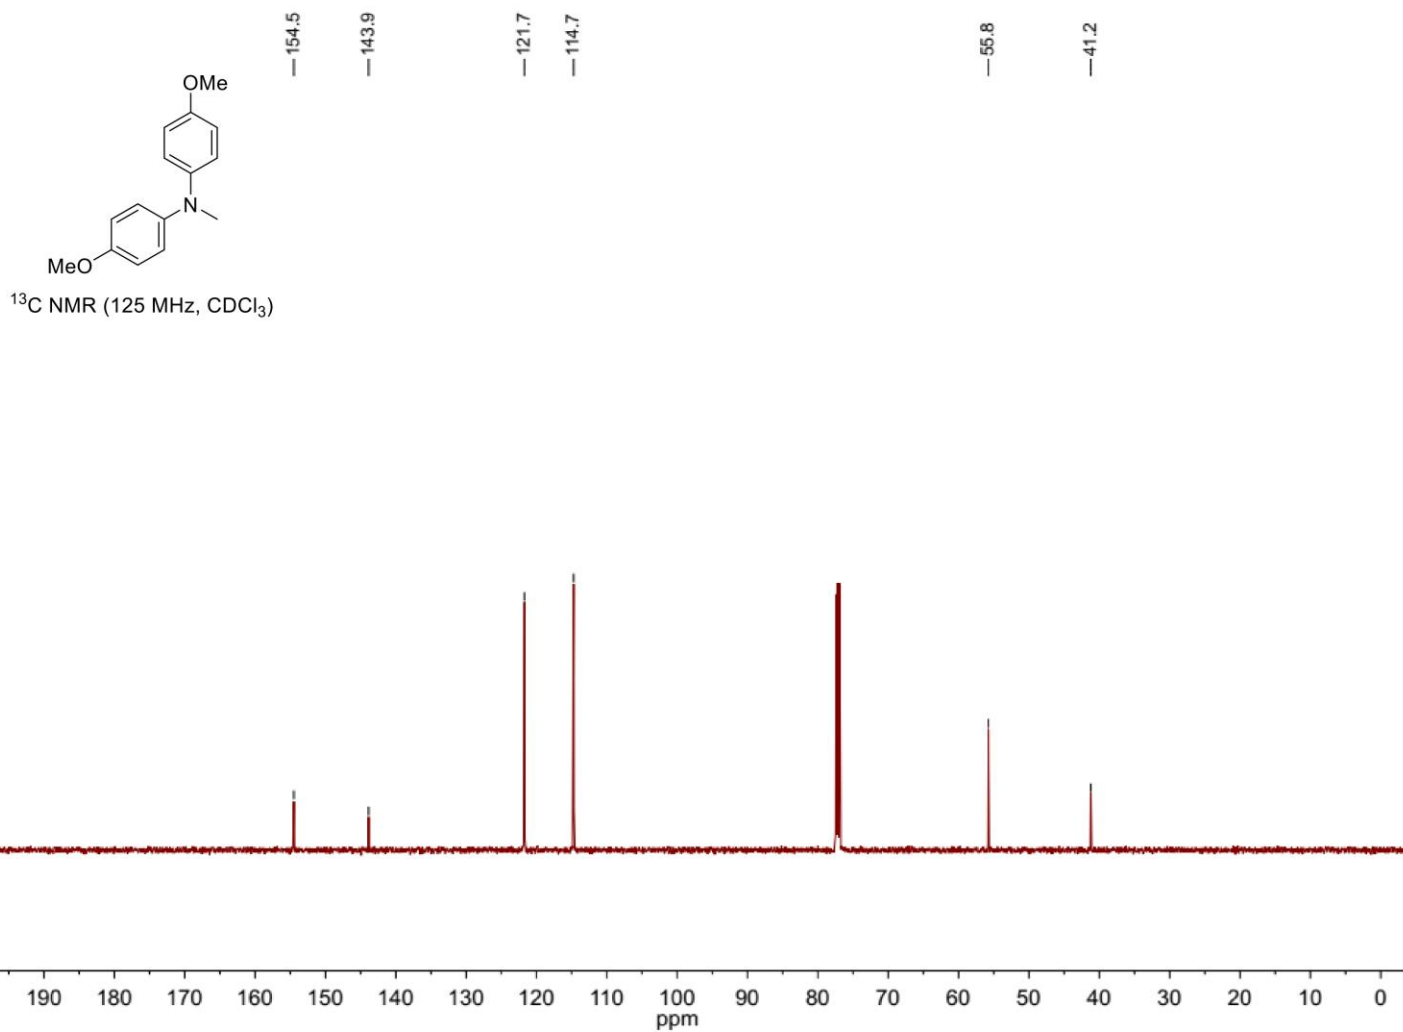

[Go back to table of contents](#)

### *N,N*-Diethyl-4-methoxyaniline (48)

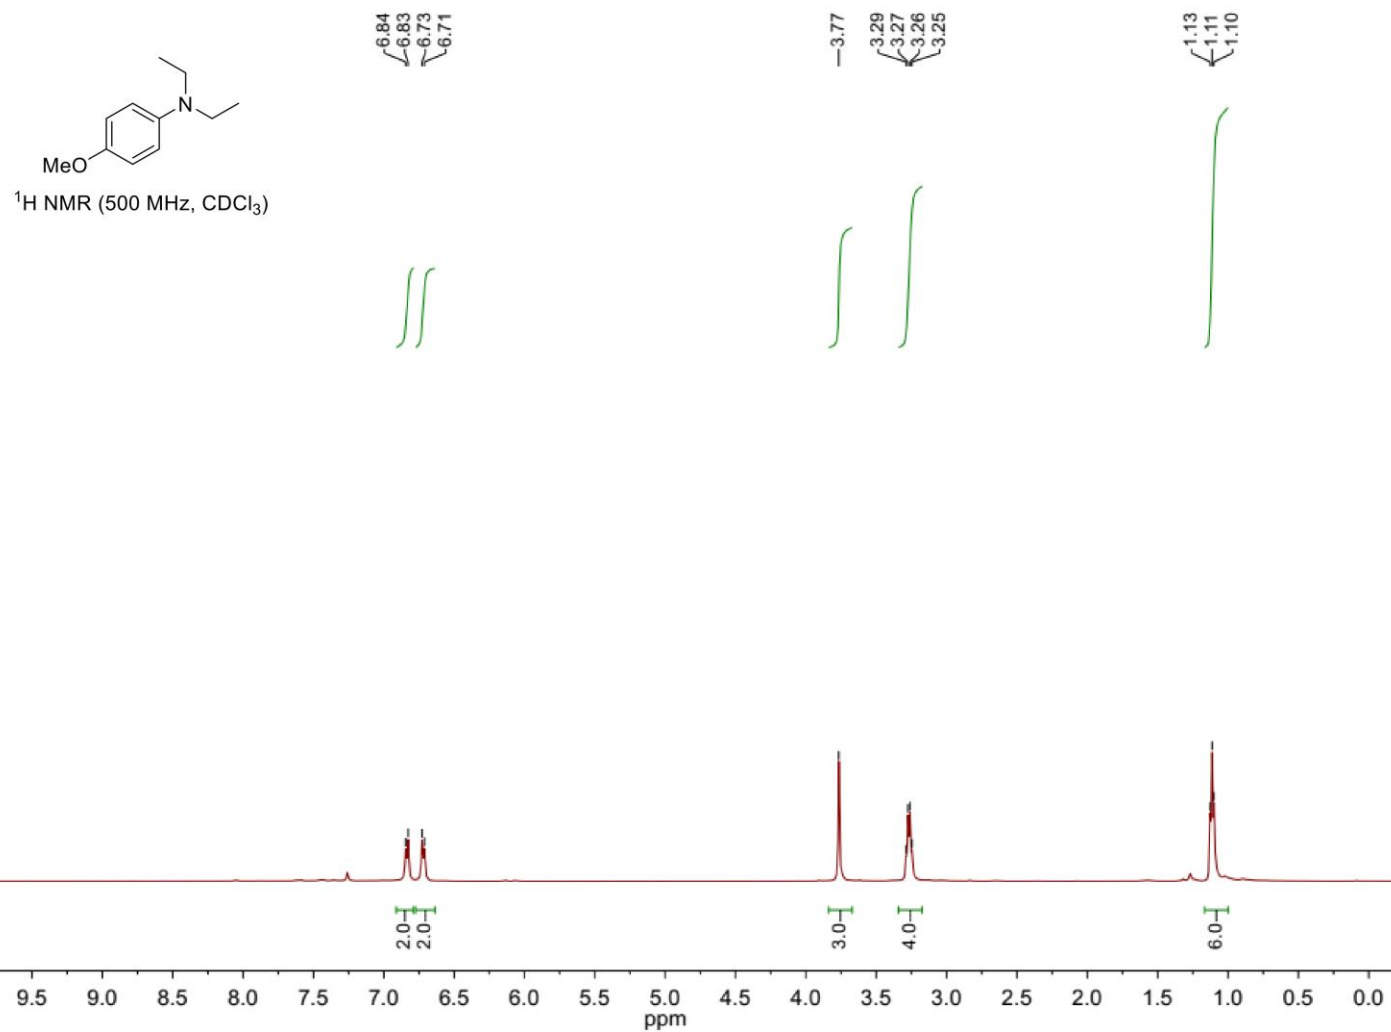

[Go back to table of contents](#)

### *N,N*-Diethyl-4-methoxyaniline (48)

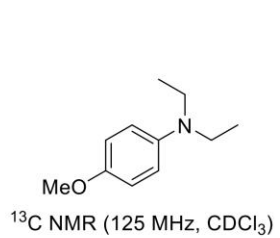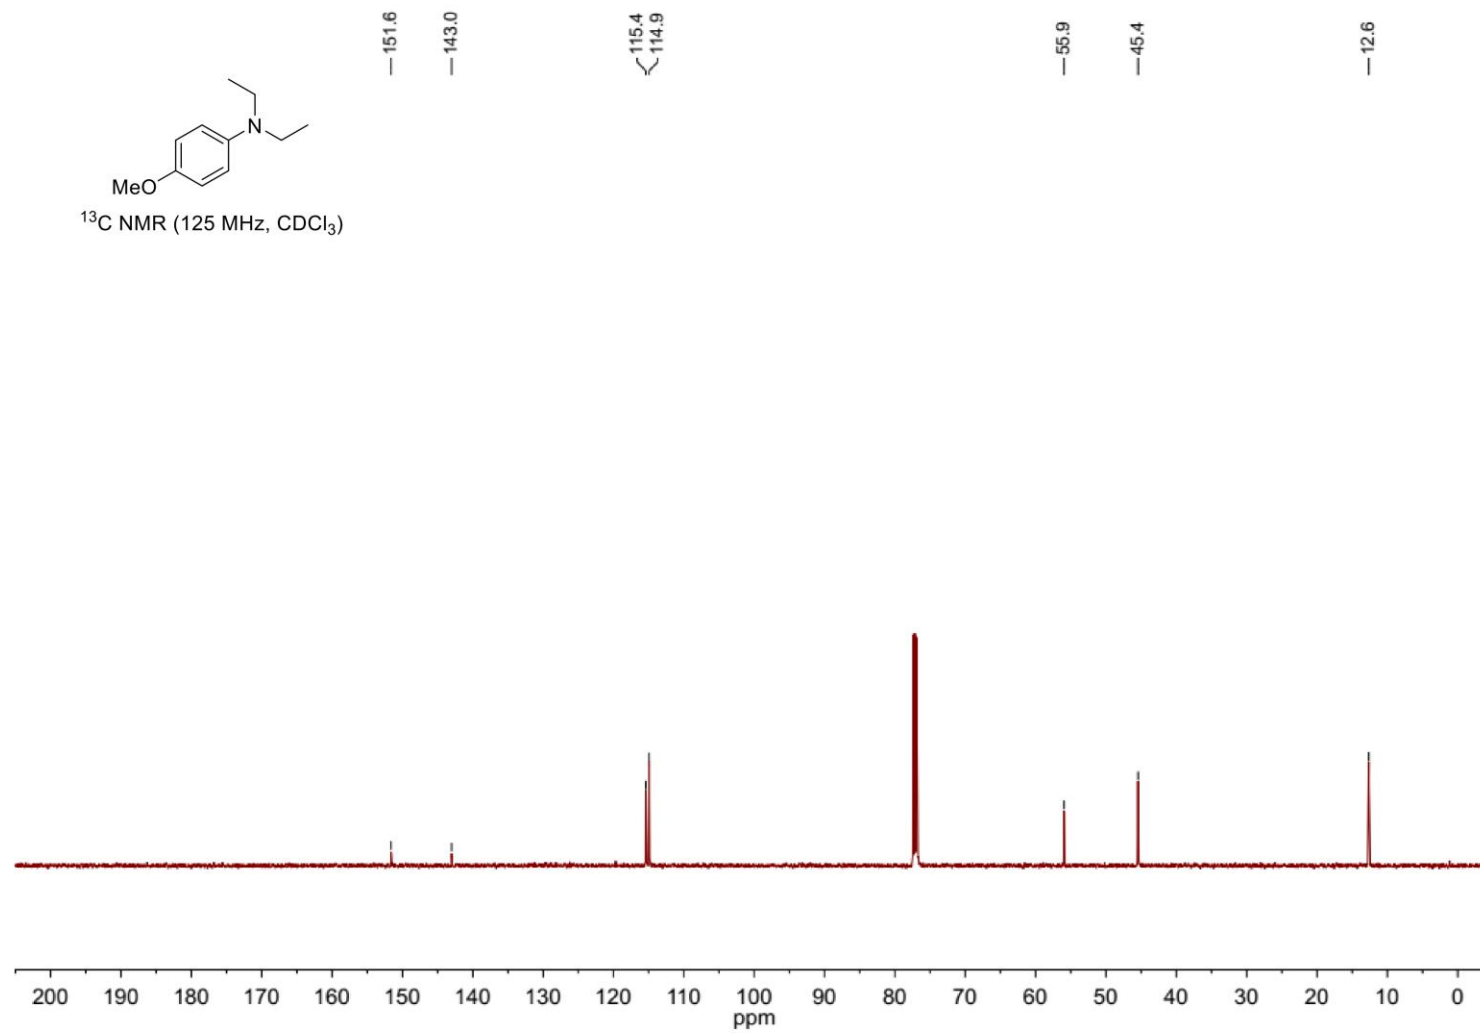

[Go back to table of contents](#)



### *N,N*-Diethyl-3-methoxyaniline (49)

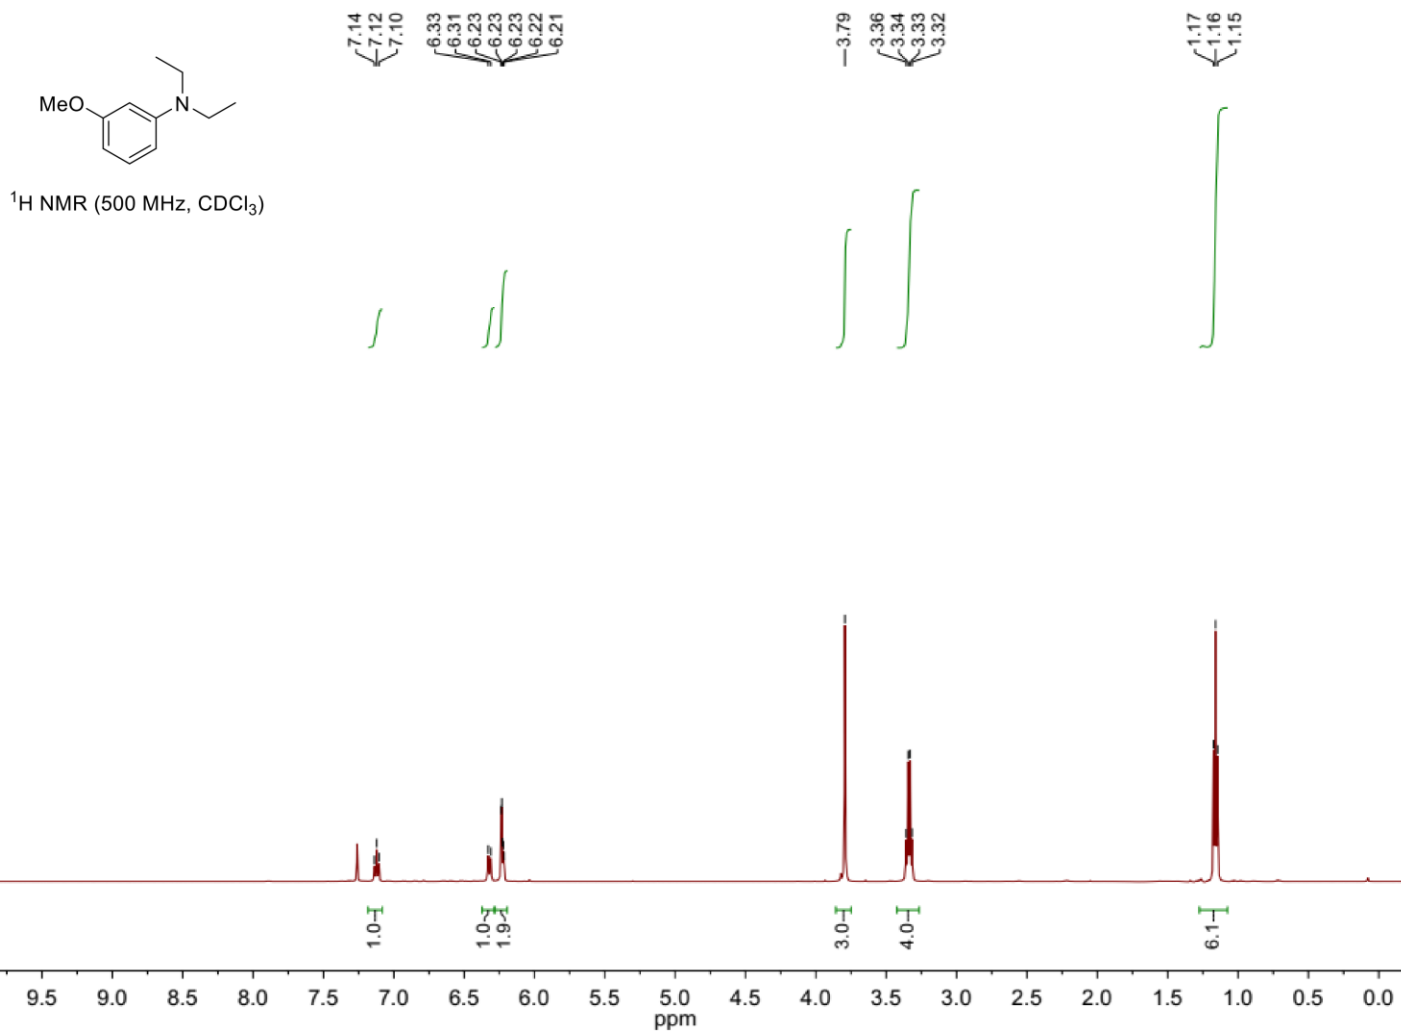

[Go back to table of contents](#)

### *N,N*-Diethyl-3-methoxyaniline (49)

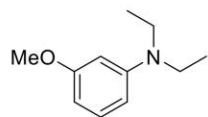

<sup>13</sup>C NMR (125 MHz, CDCl<sub>3</sub>)

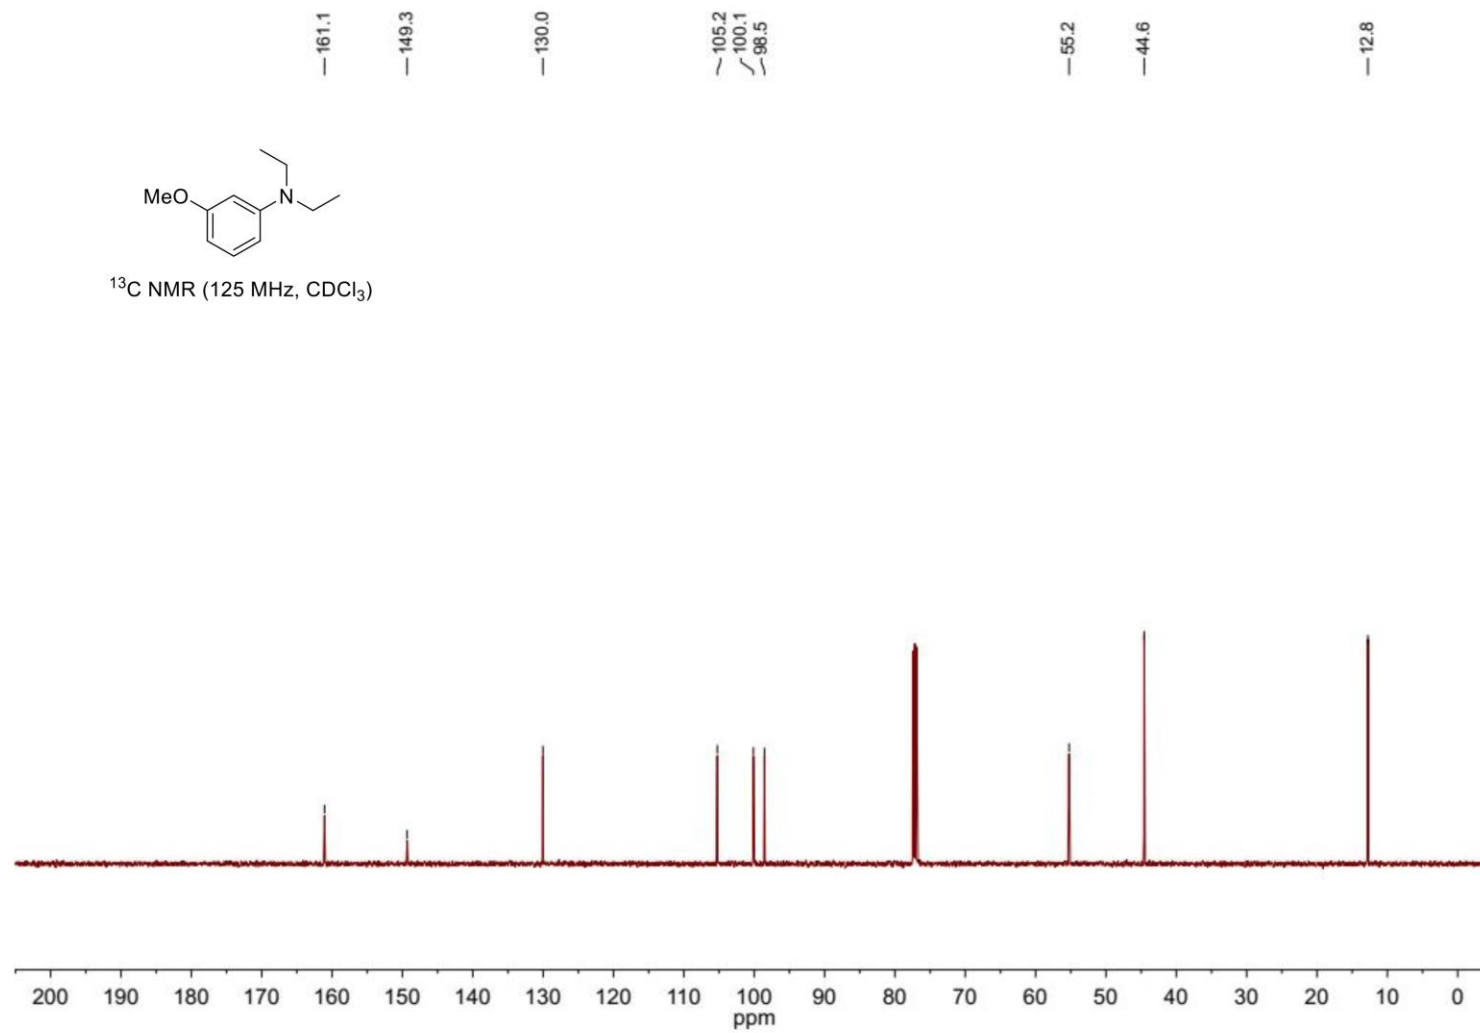

[Go back to table of contents](#)

### *N,N*-Diethyl-4-methylaniline (50)

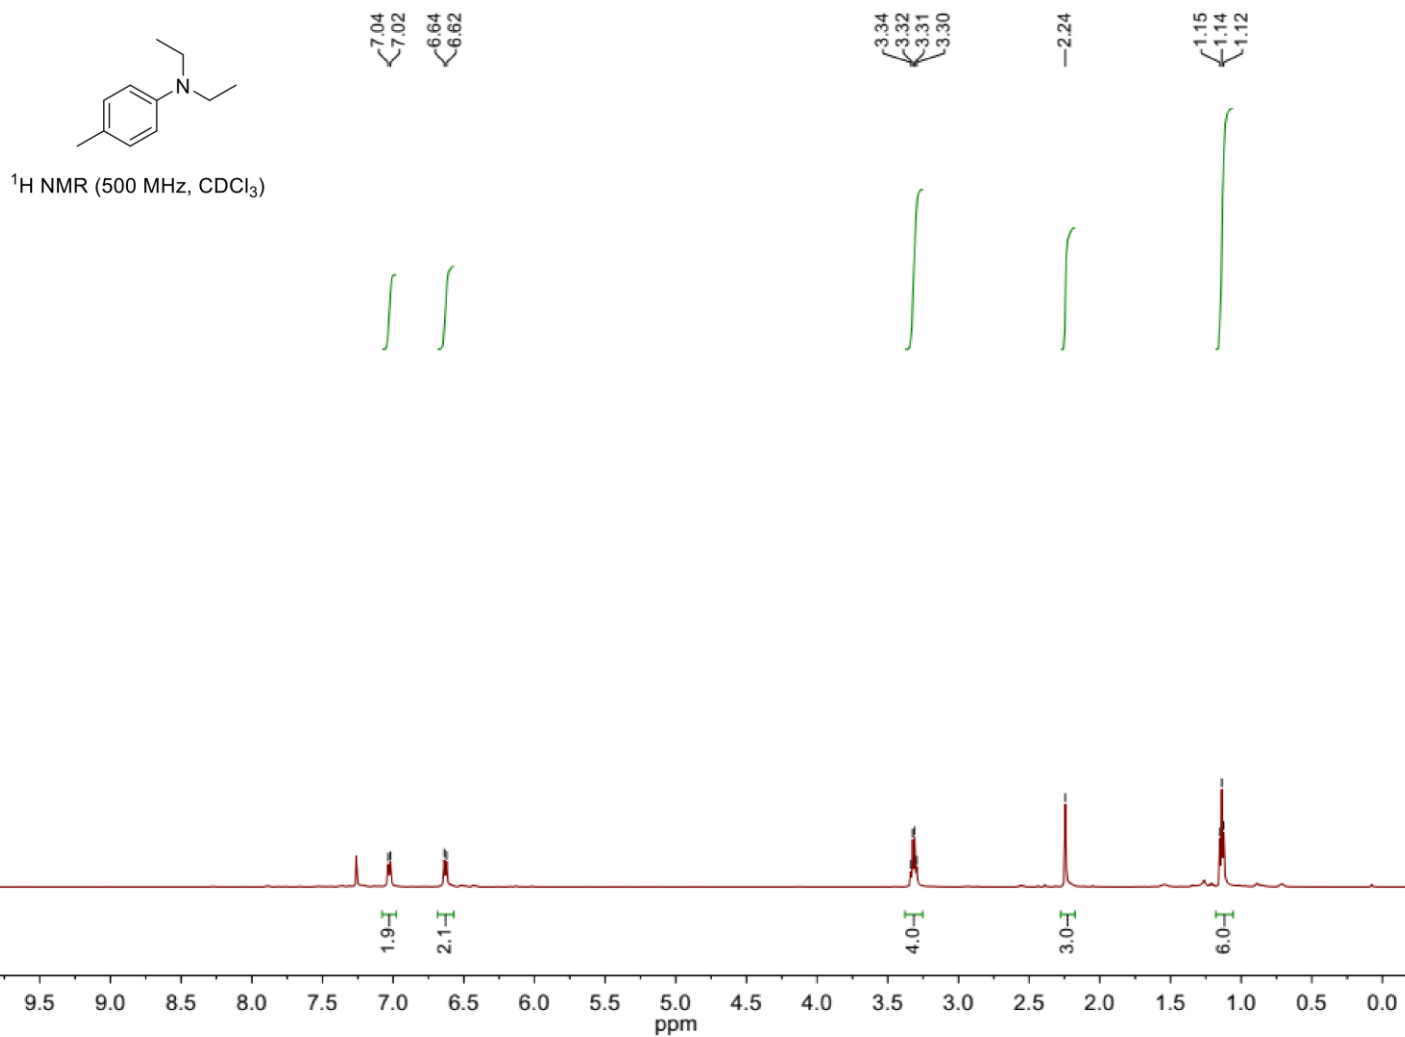

### *N,N*-Diethyl-4-methylaniline (50)

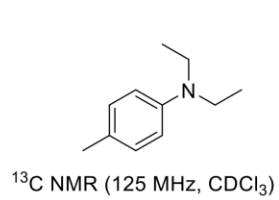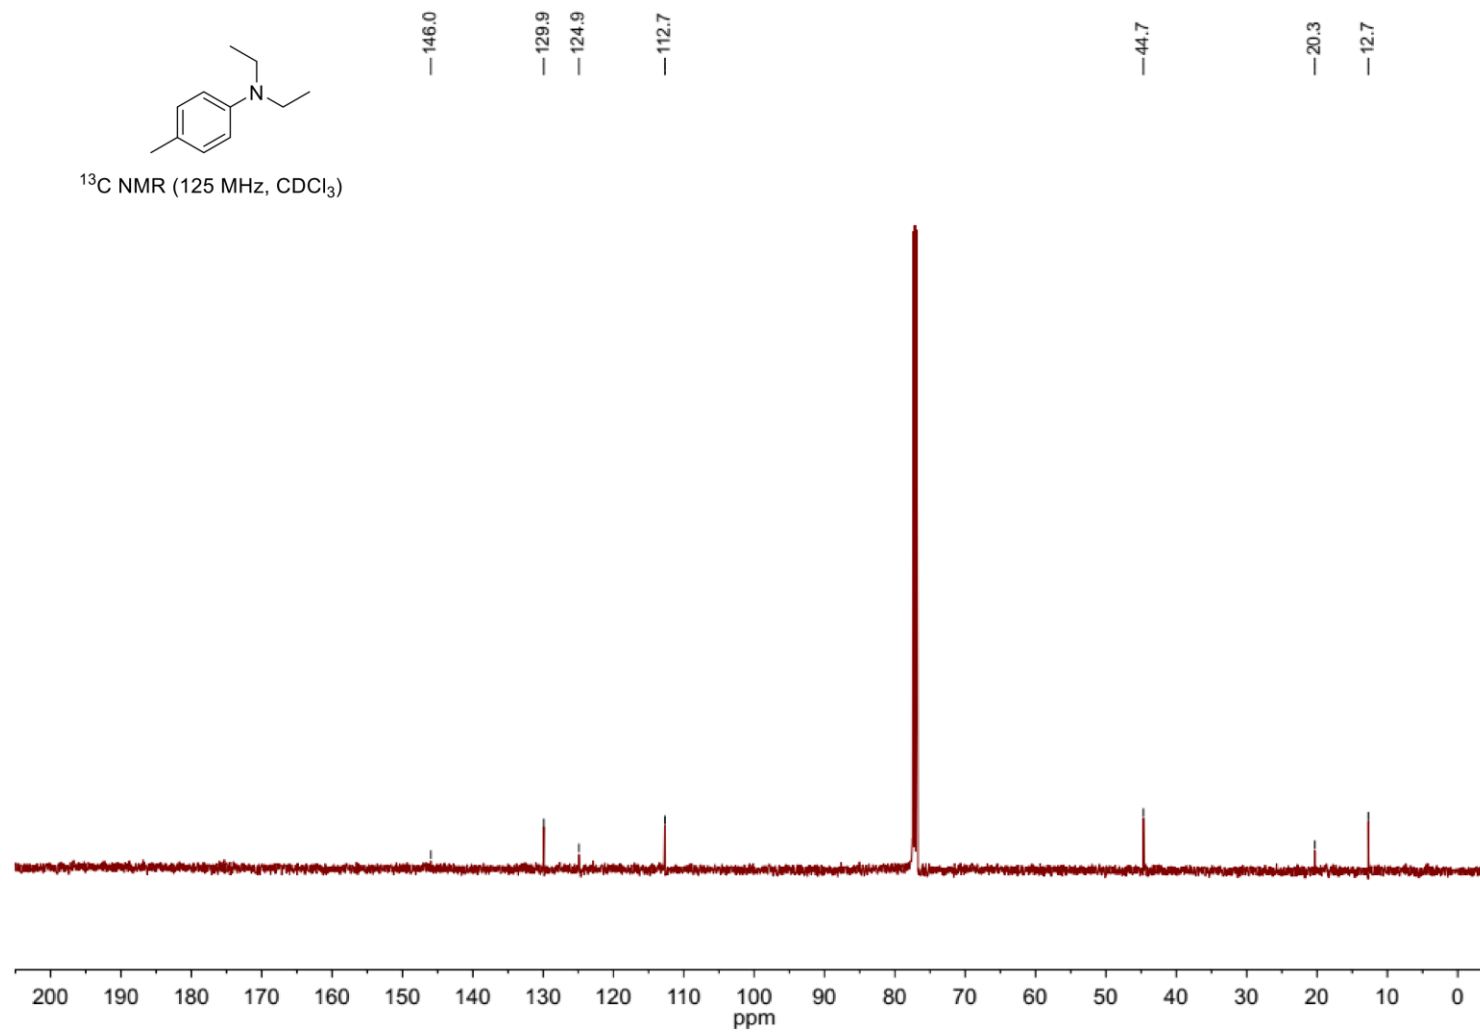

[Go back to table of contents](#)

### *N,N*-Diethyl-3,4-dimethylaniline (51)

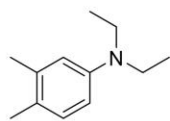

<sup>1</sup>H NMR (500 MHz, CDCl<sub>3</sub>)

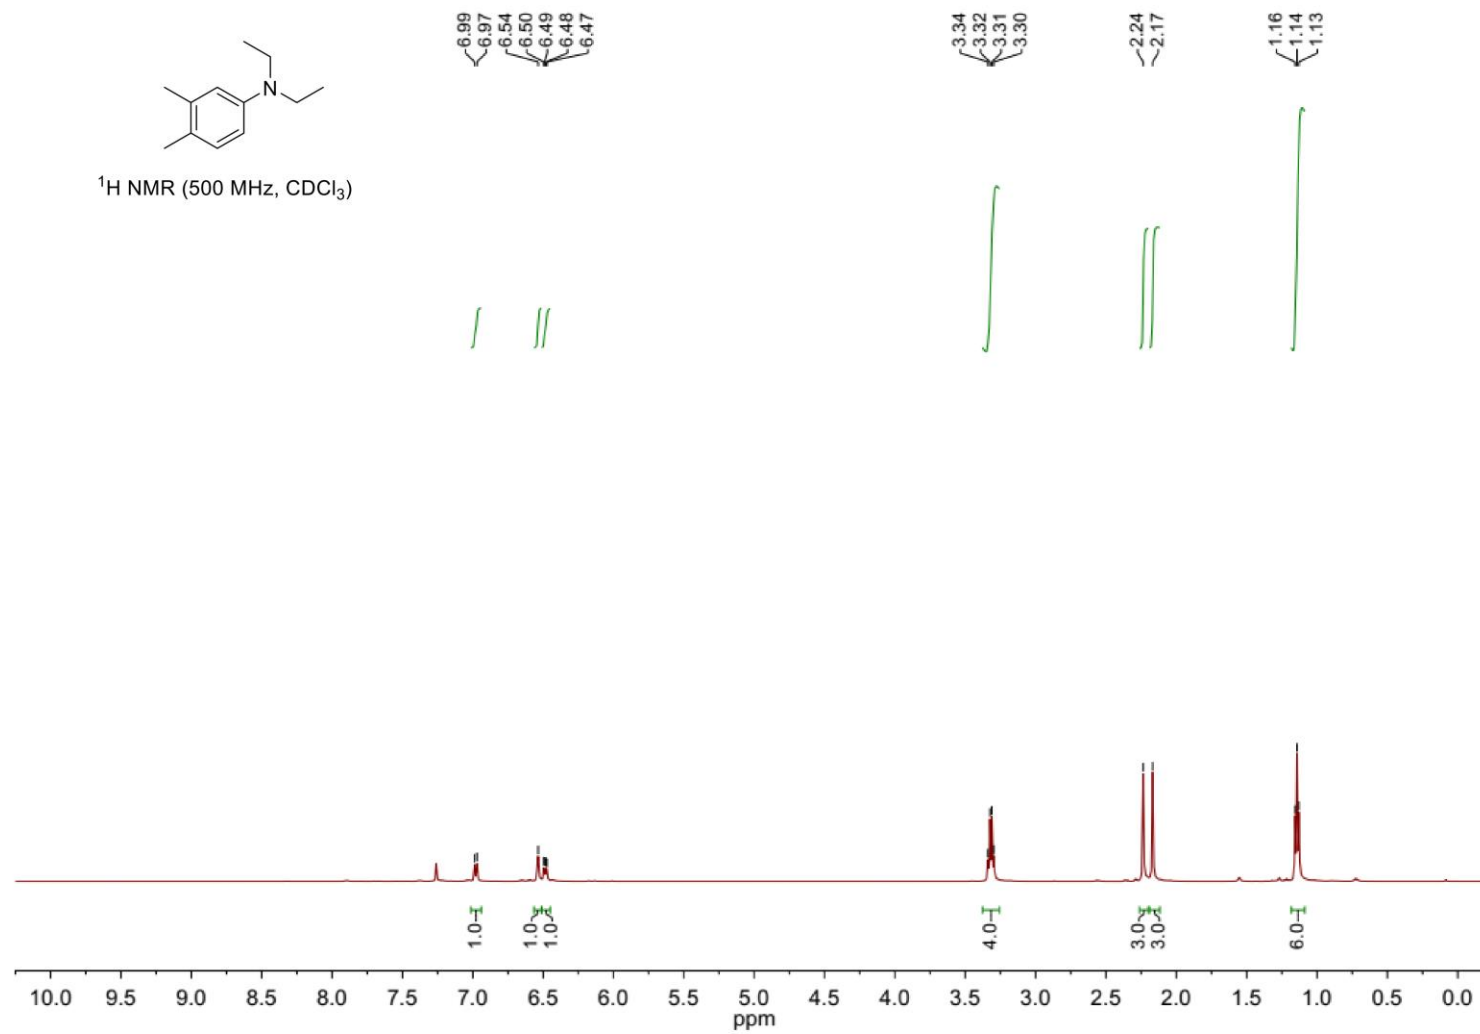

### *N,N*-Diethyl-3,4-dimethylaniline (51)

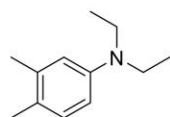

<sup>13</sup>C NMR (125 MHz, CDCl<sub>3</sub>)

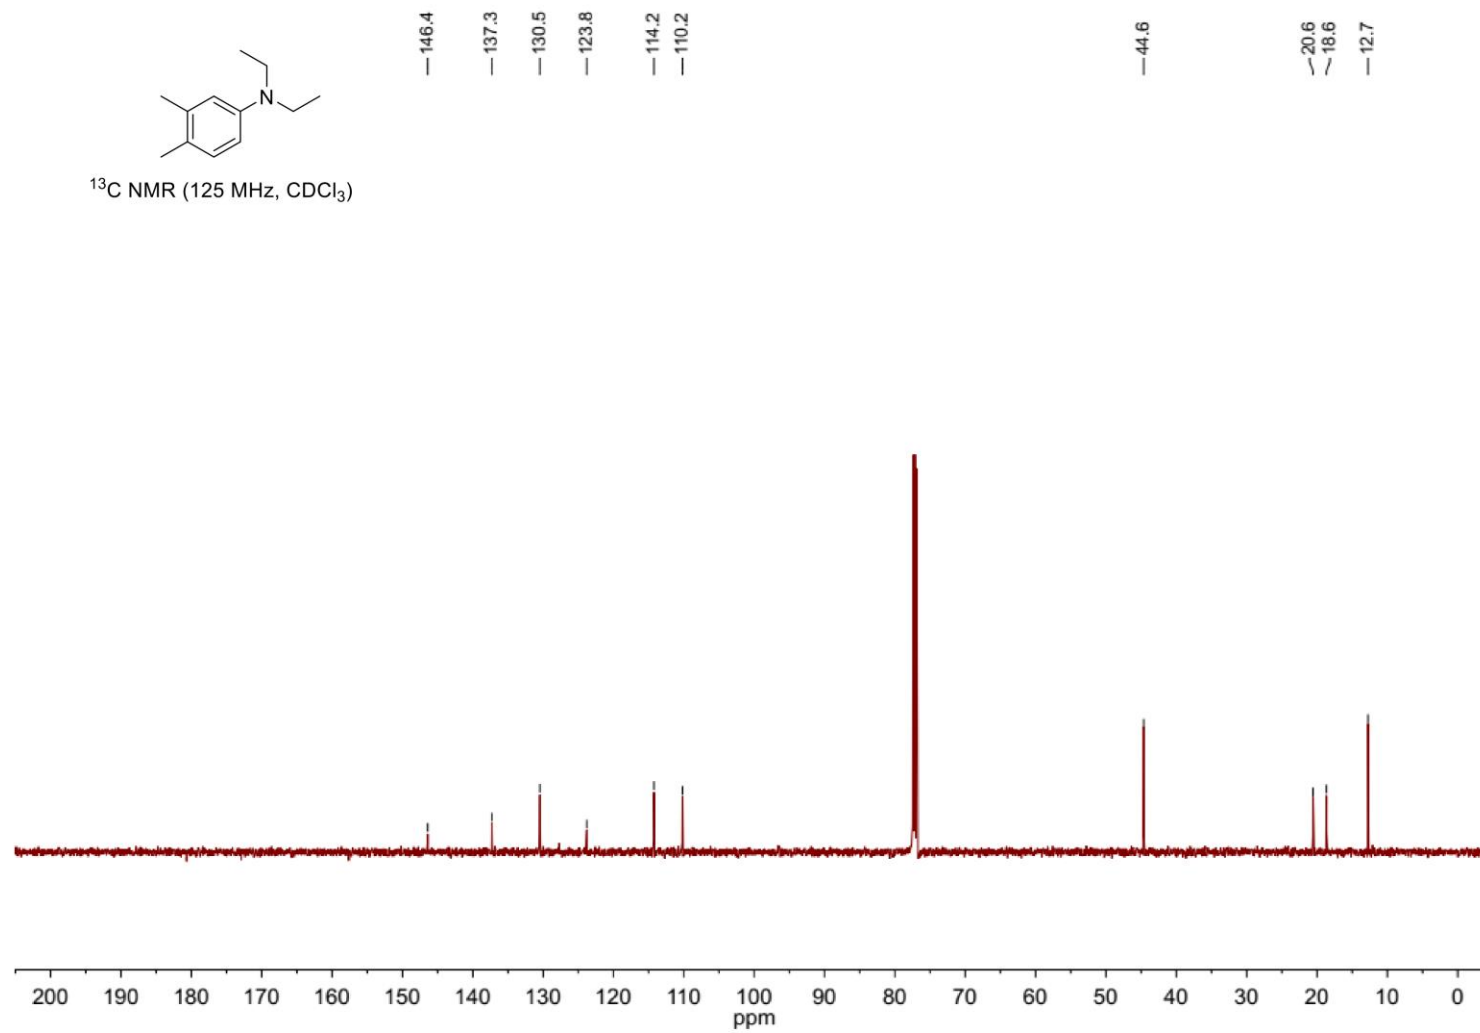

[Go back to table of contents](#)

*N,N*-Dimethyl-3,4-dimethylaniline (52)

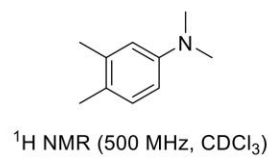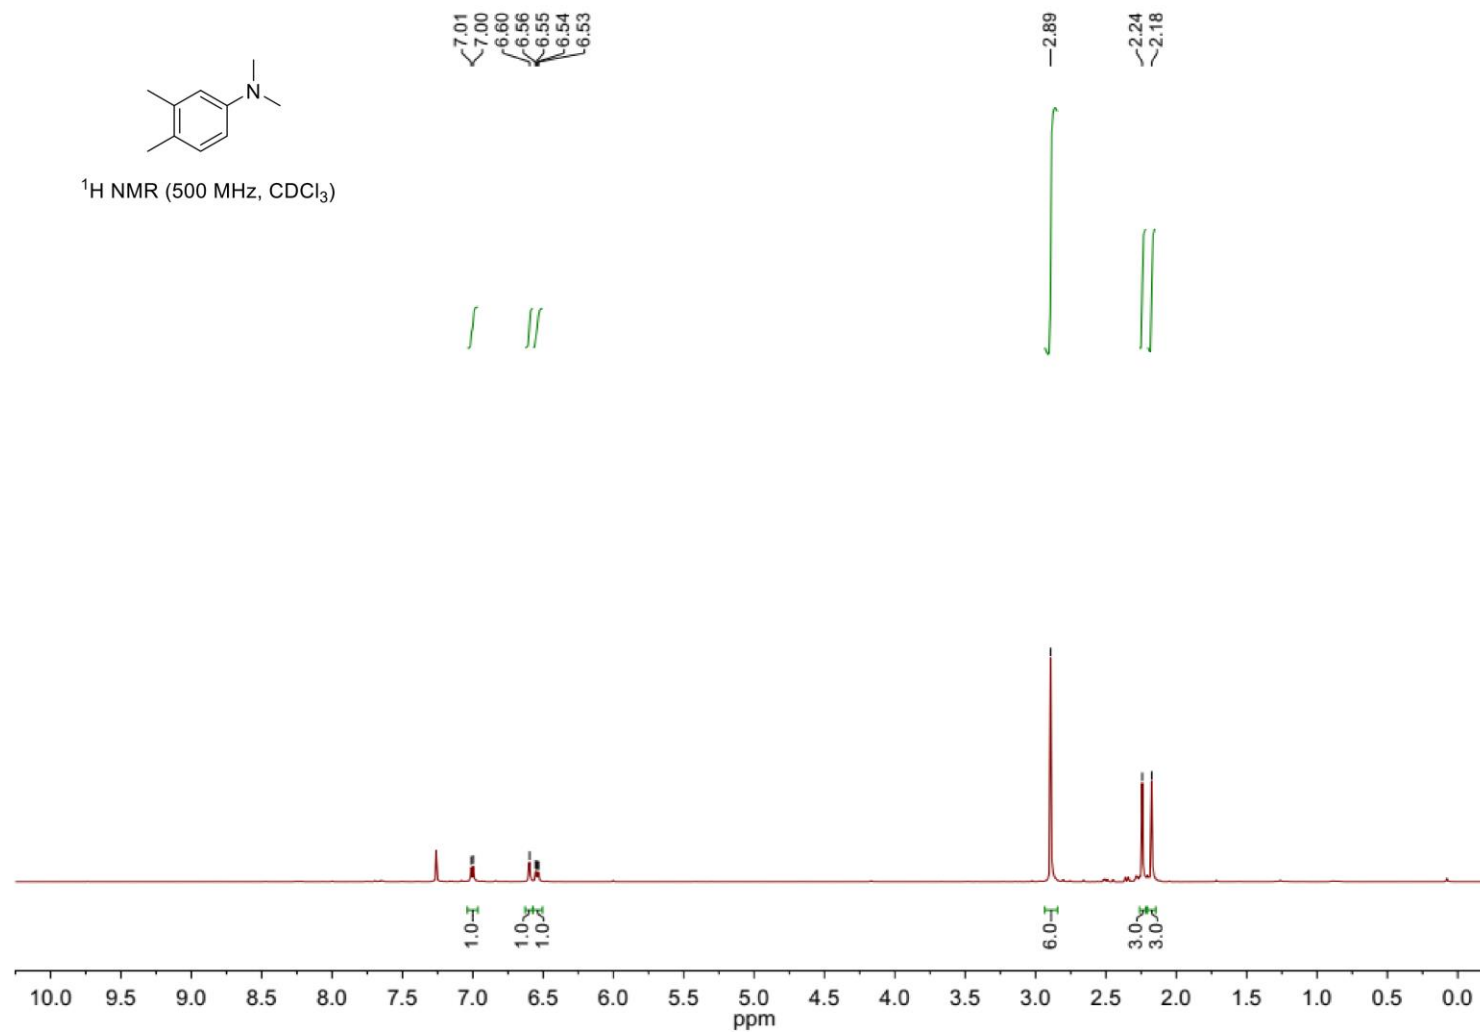

### *N,N*-Dimethyl-3,4-dimethylaniline (52)

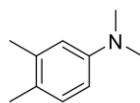

$^{13}\text{C}$  NMR (125 MHz,  $\text{CDCl}_3$ )

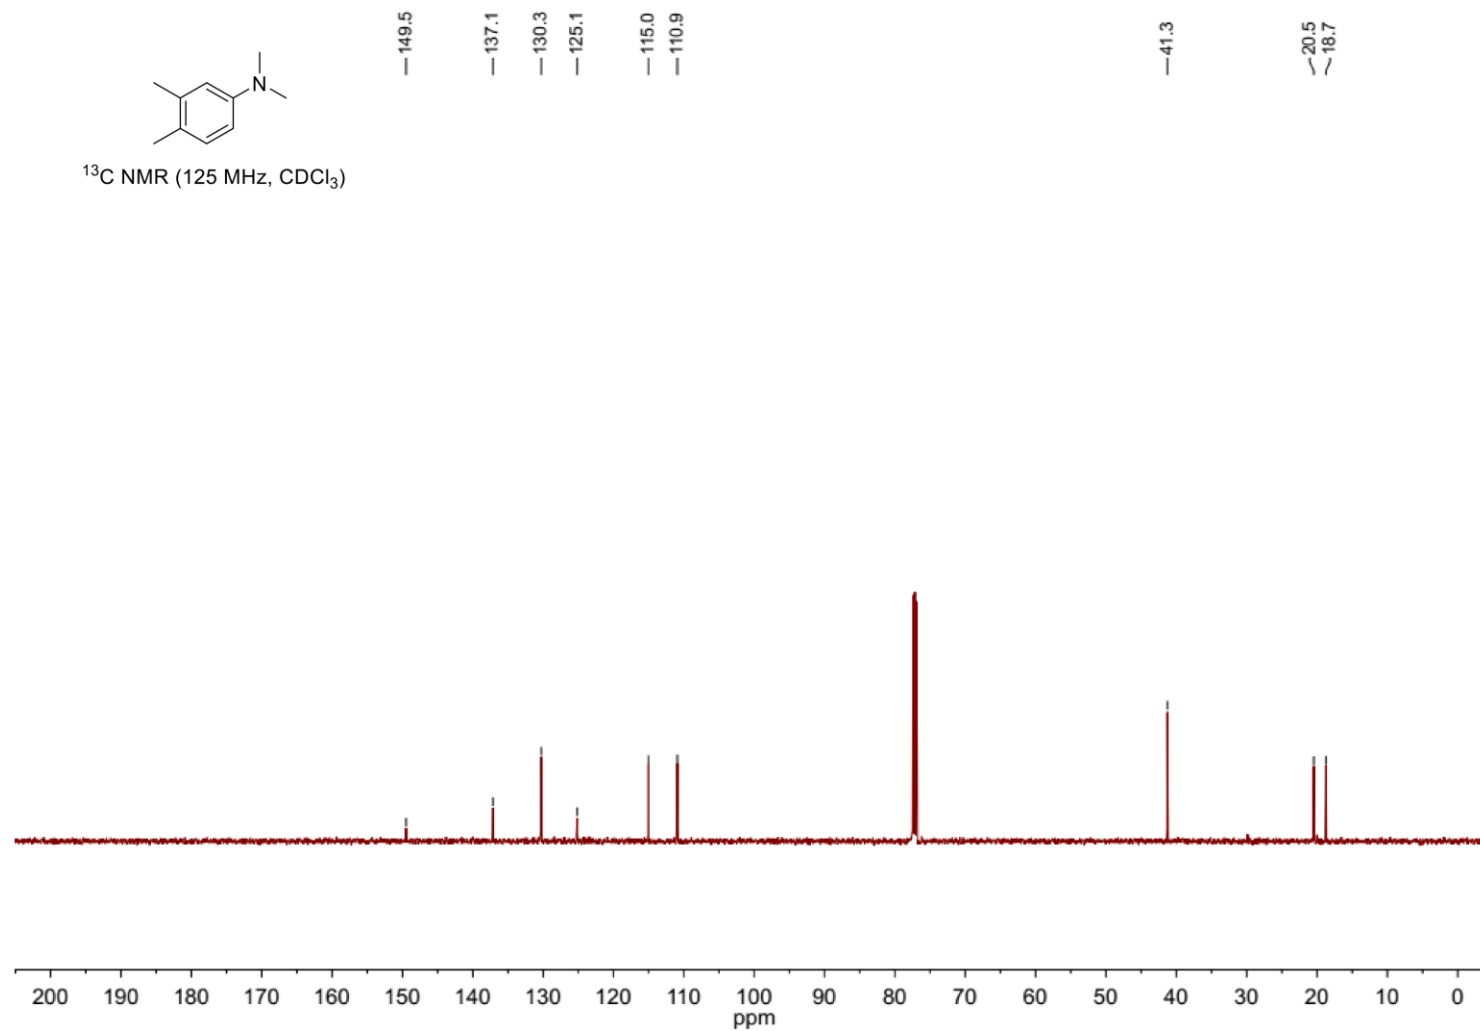

[Go back to table of contents](#)



### *N,N*-Diethyl-3,4,5-trimethylaniline (53)

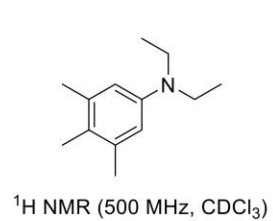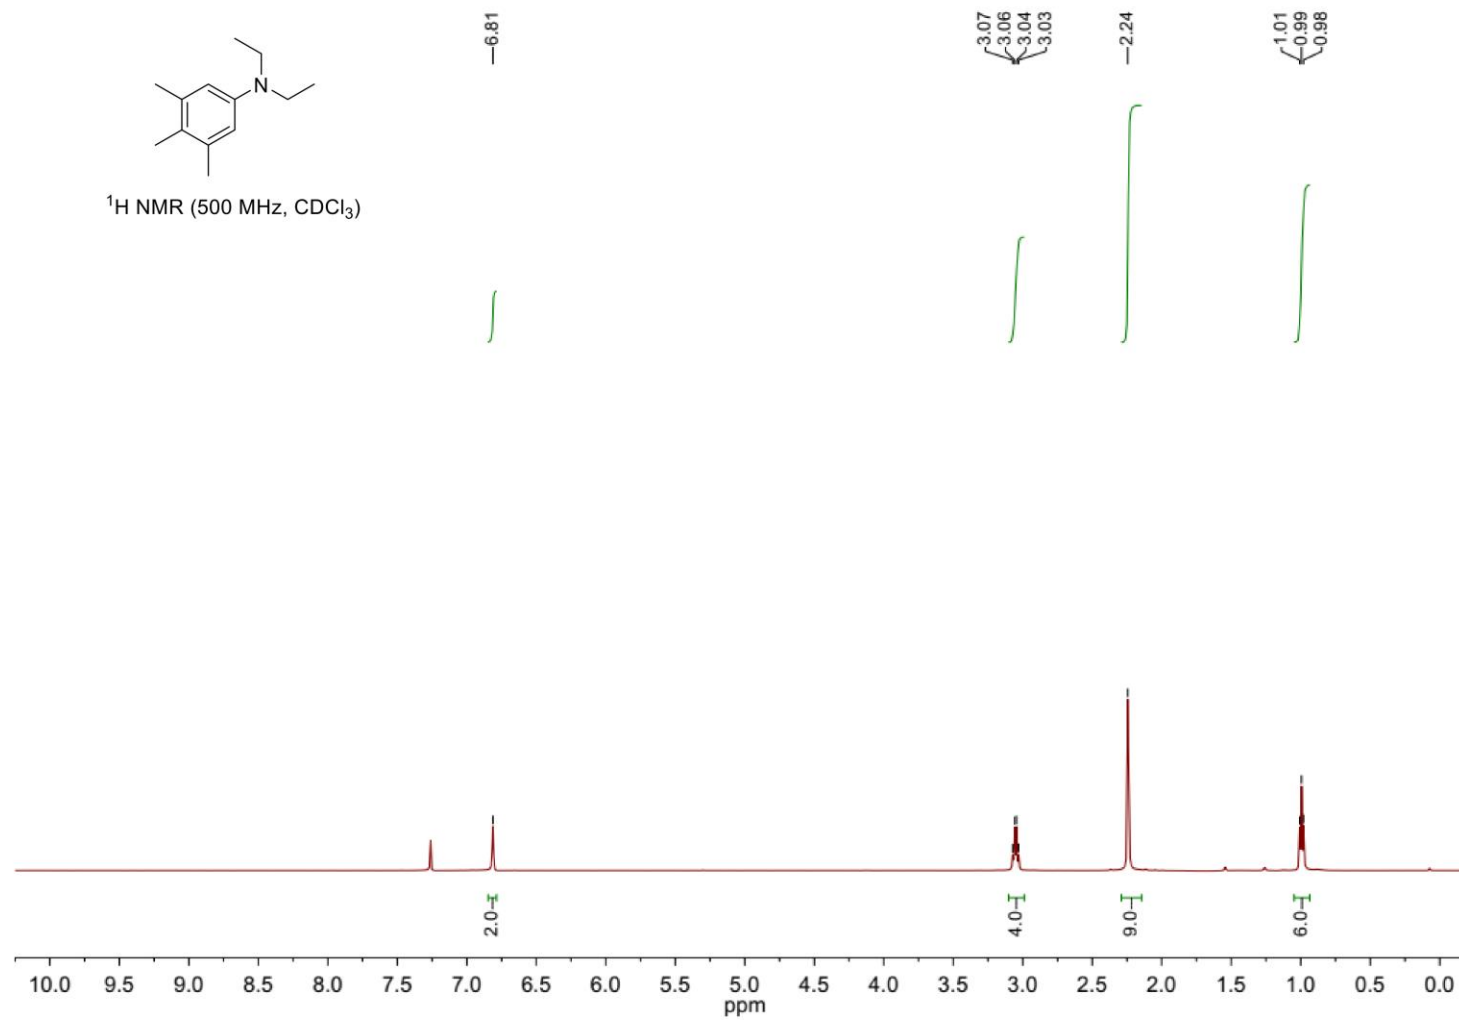

### *N,N*-Diethyl-3,4,5-trimethylaniline (53)

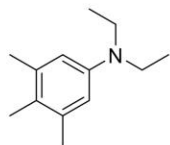

<sup>13</sup>C NMR (125 MHz, CDCl<sub>3</sub>)

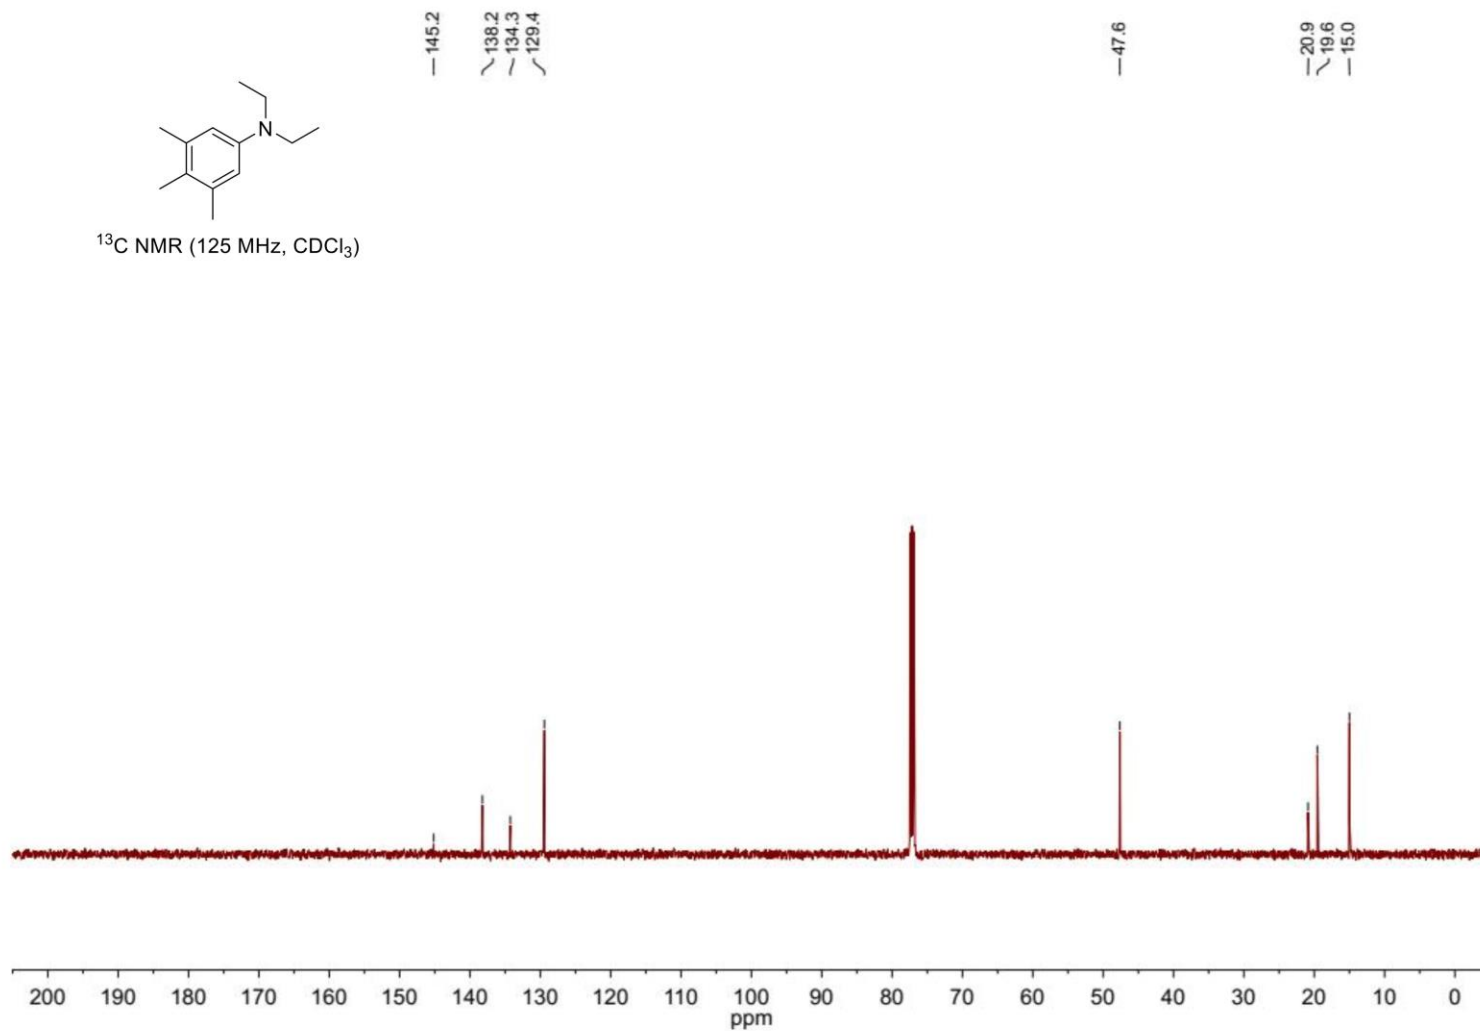

[Go back to table of contents](#)

*tert*-Butyl (4-(4-(diisobutylamino)benzyl)phenyl)carbamate (54)

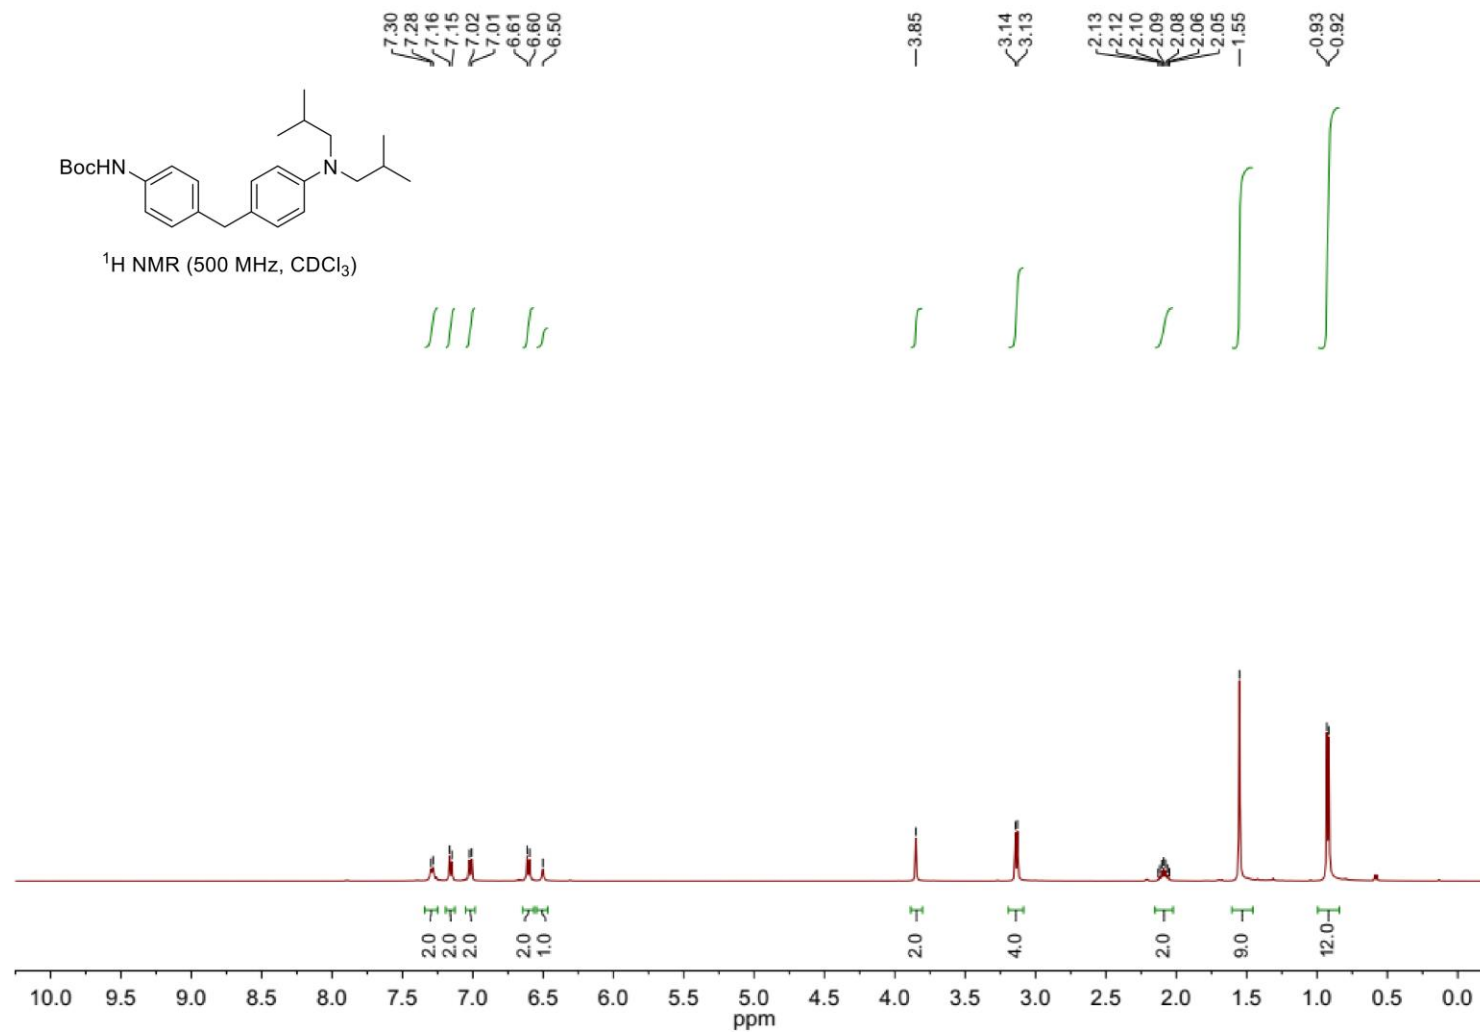

***tert*-Butyl (4-(4-(diisobutylamino)benzyl)phenyl)carbamate (54)**

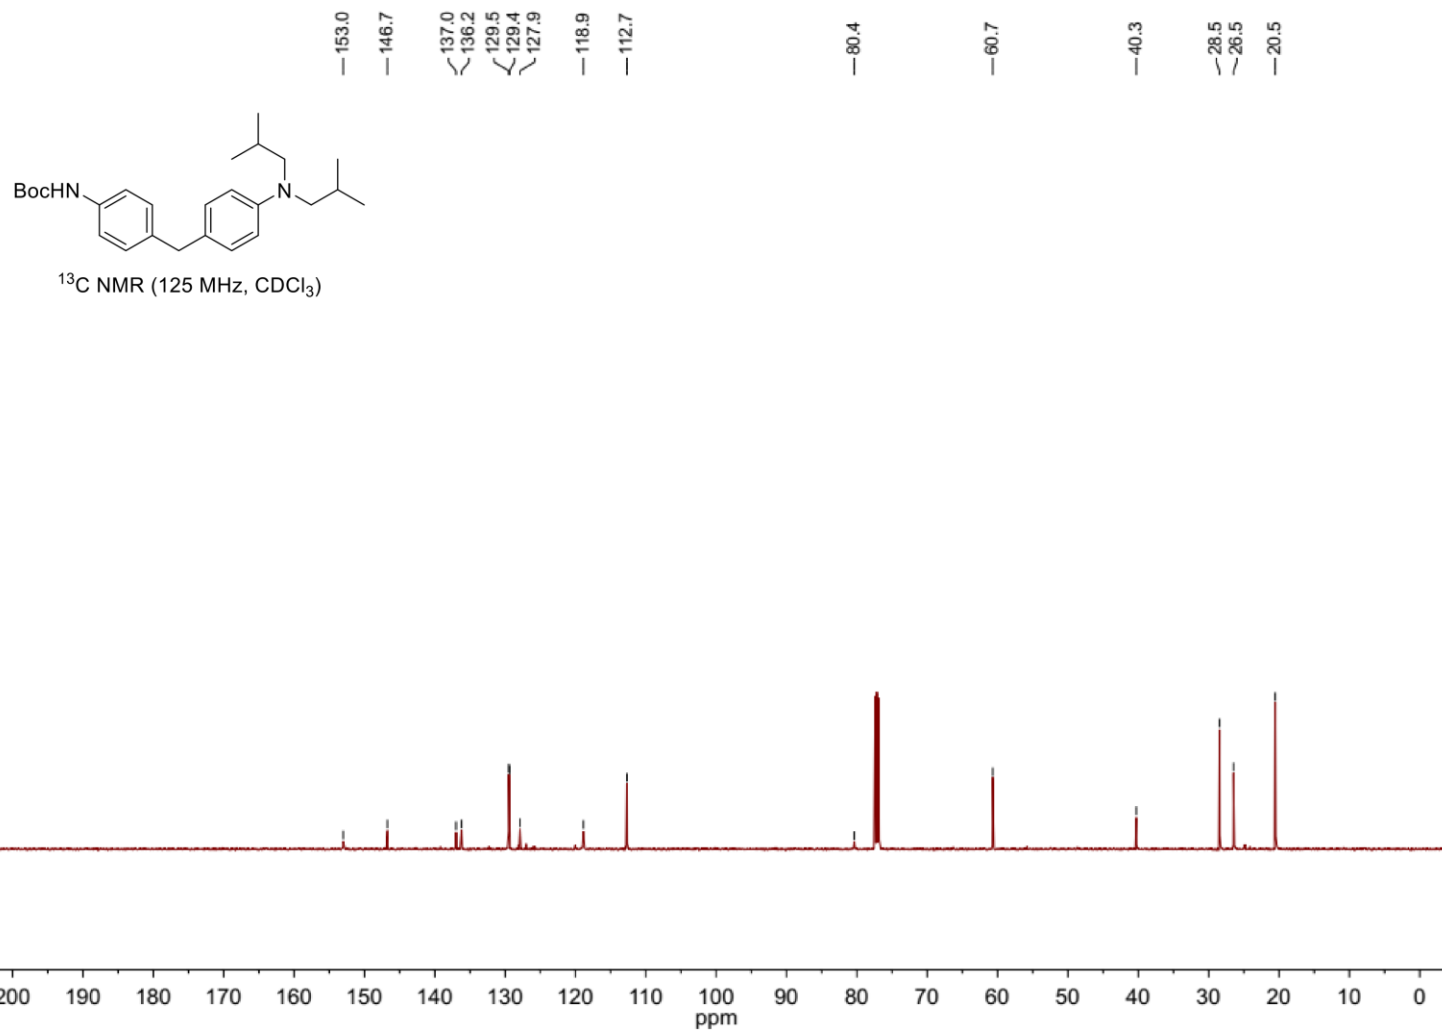

[Go back to table of contents](#)

### 1-Cyclohexyl-5-methoxy-1H-indole (55)

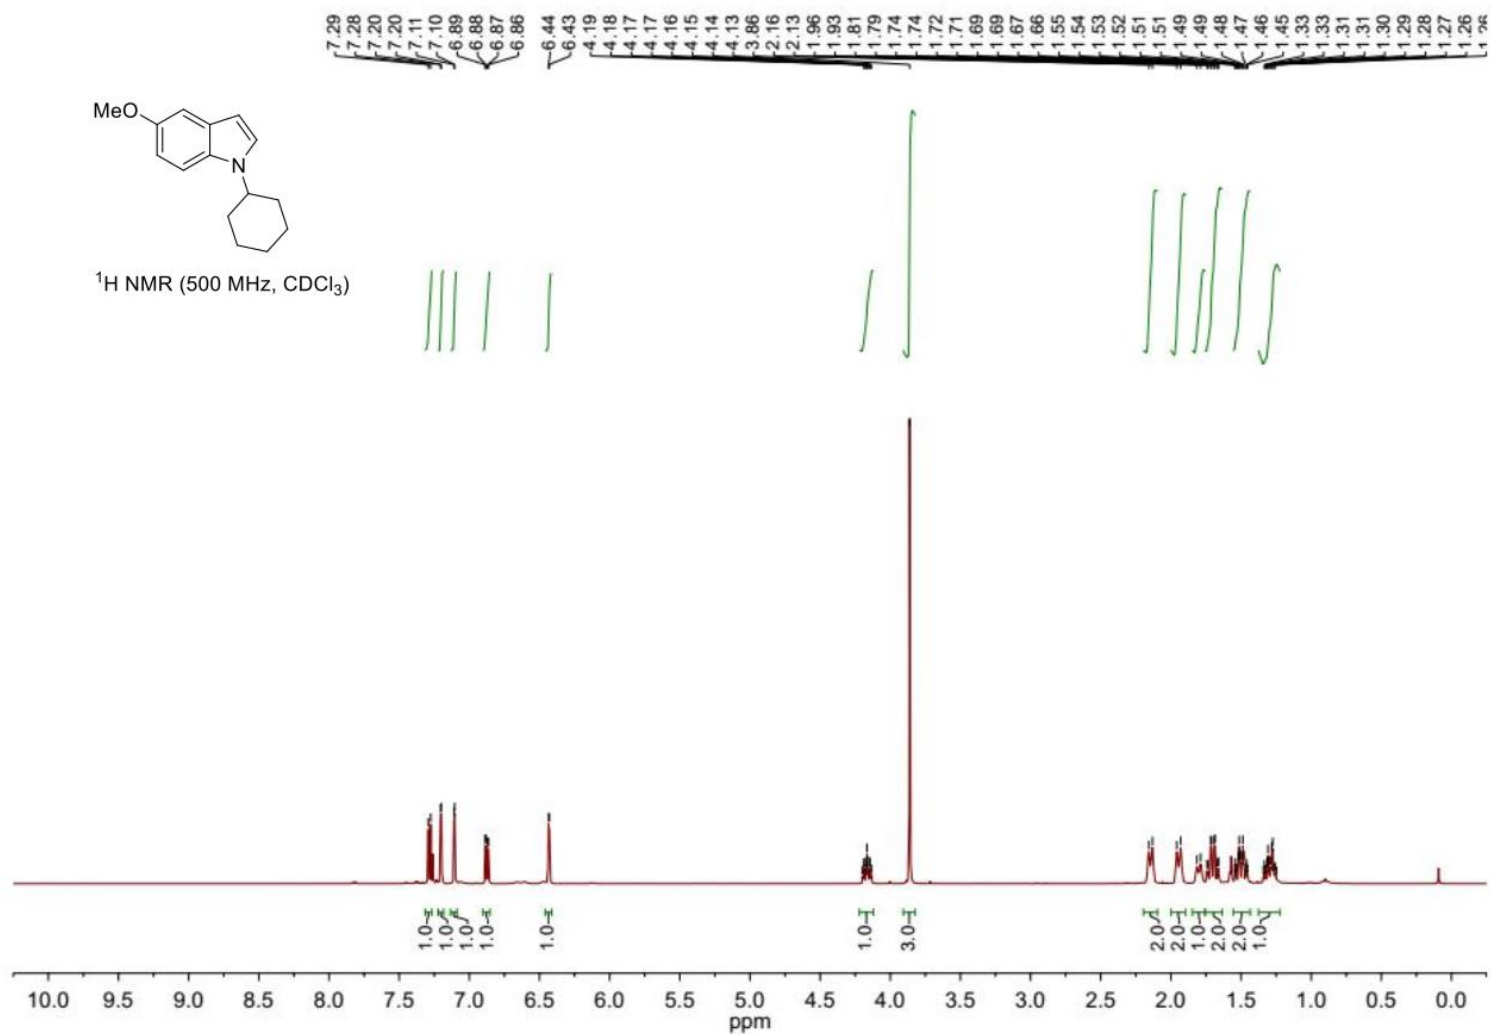

### 1-Cyclohexyl-5-methoxy-1H-indole (55)

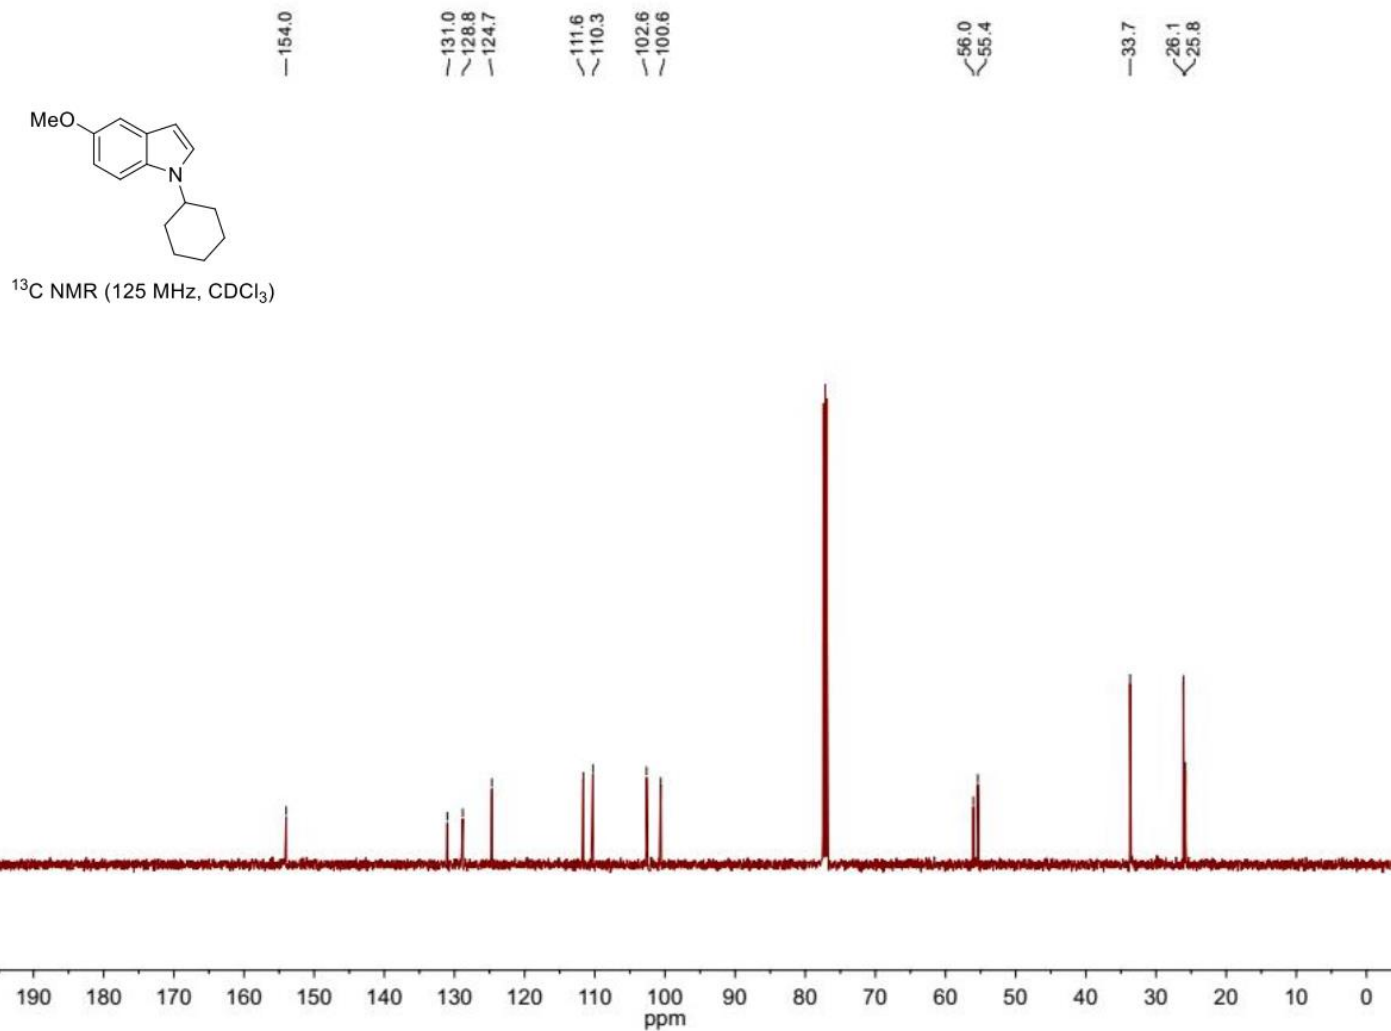

### 1-Cyclohexyl-3-methyl-1H-indole (56)

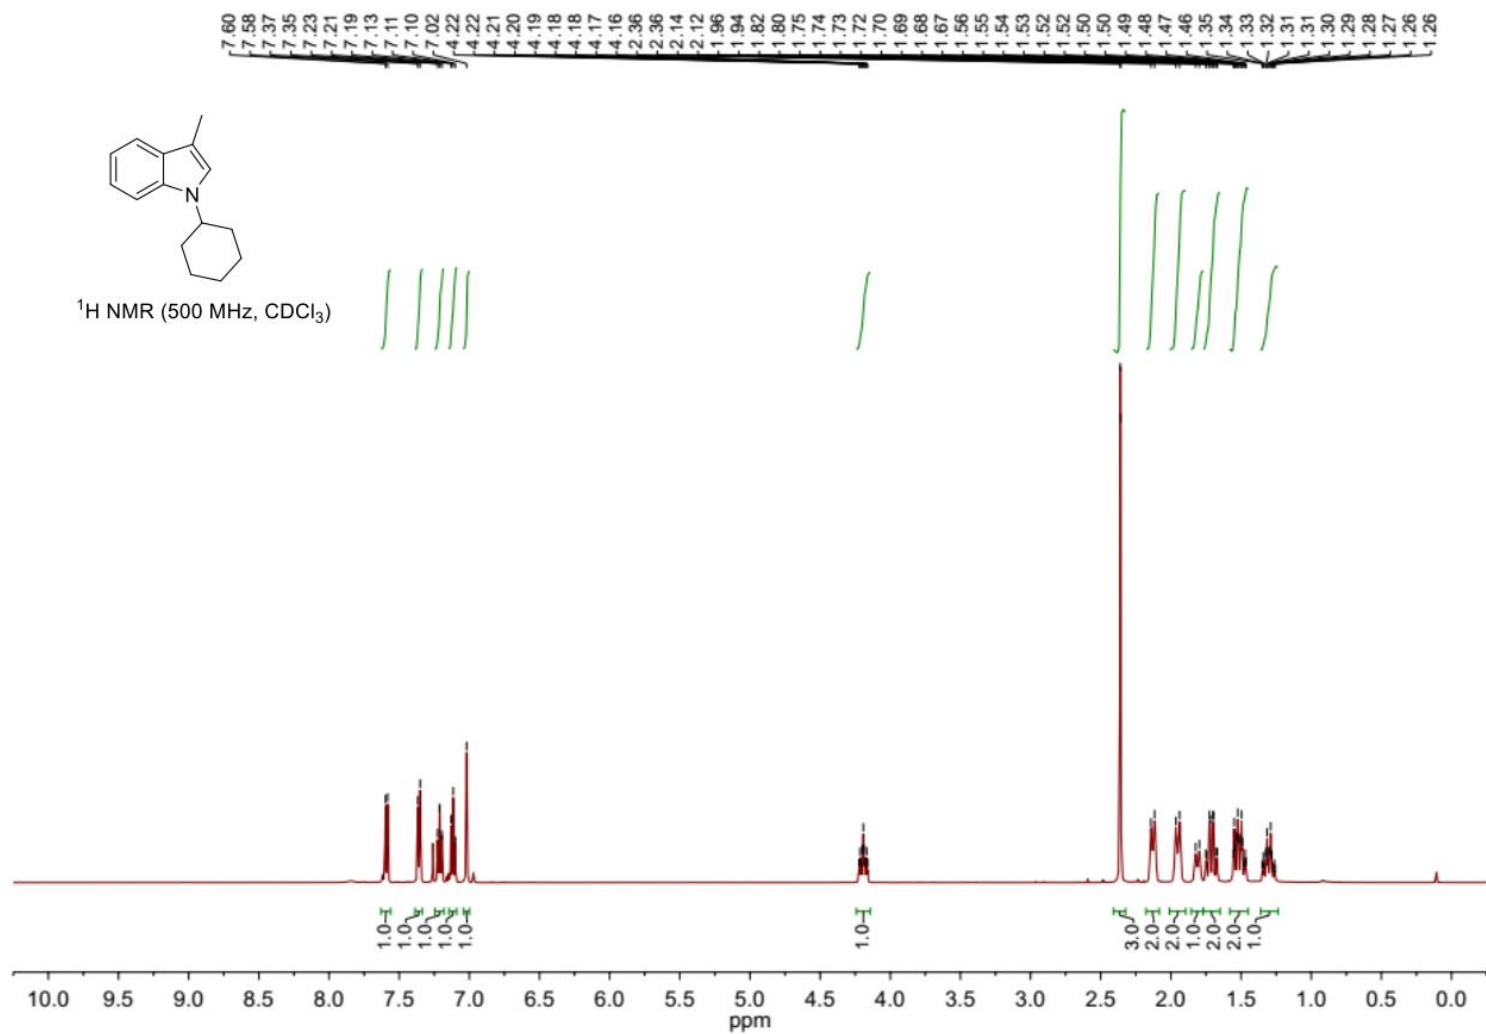

### 1-Cyclohexyl-3-methyl-1H-indole (56)

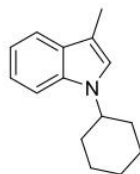

<sup>13</sup>C NMR (125 MHz, CDCl<sub>3</sub>)

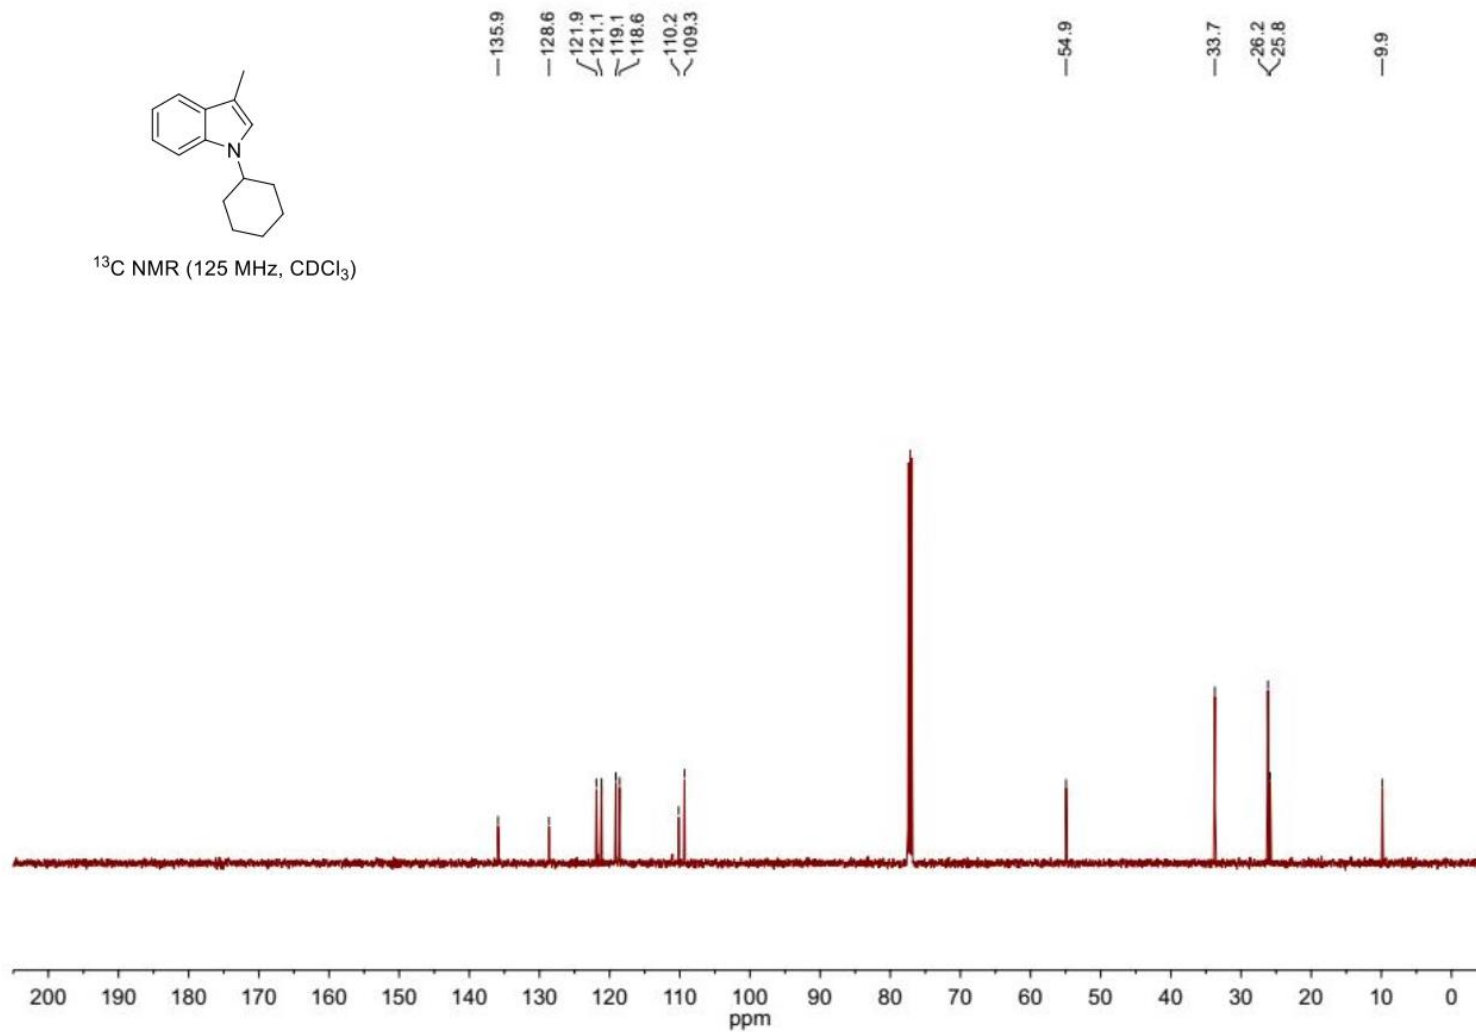

[Go back to table of contents](#)



### 3-Methyl-1-(tetrahydro-2H-pyran-4-yl)-1H-indole (57)

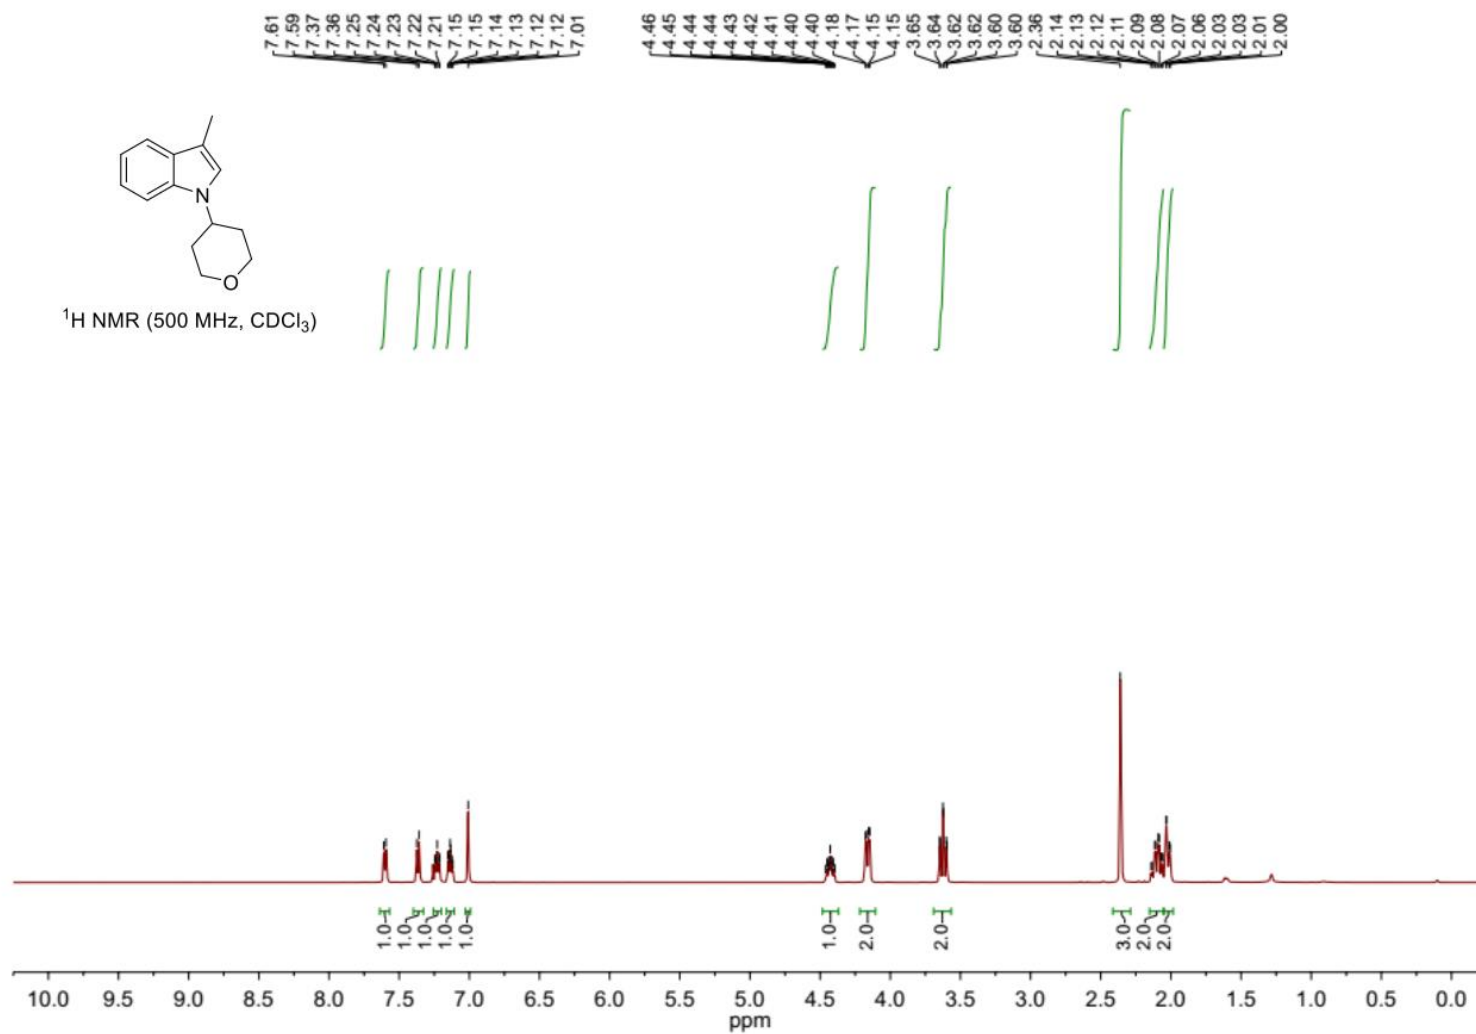

### 3-Methyl-1-(tetrahydro-2H-pyran-4-yl)-1H-indole (57)

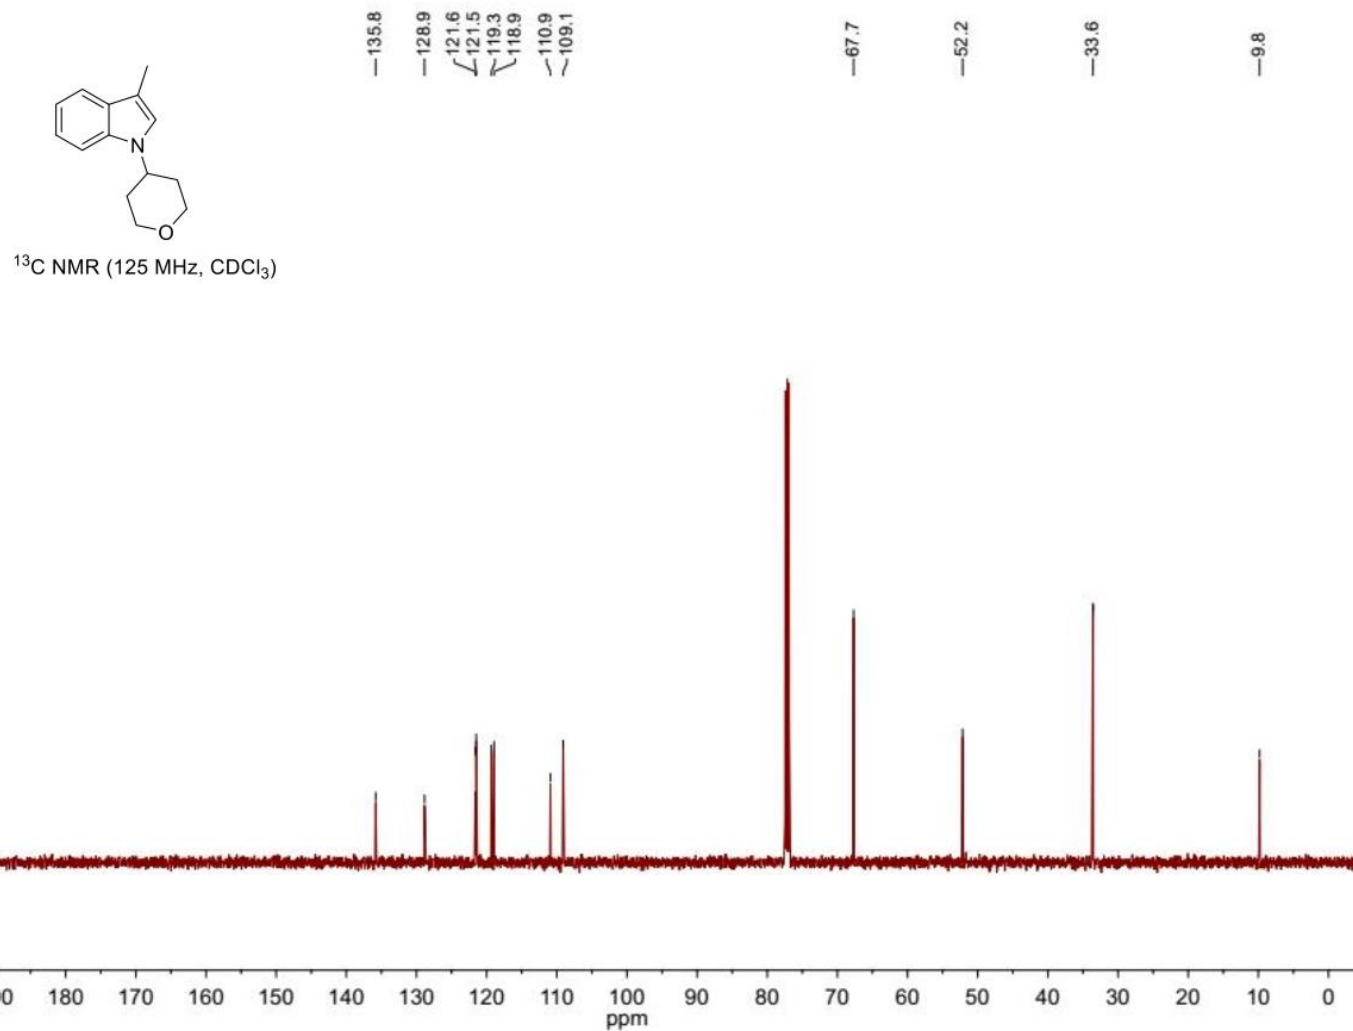

[Go back to table of contents](#)

### 4-Cyclohexyl-1,2,3,4-tetrahydrocyclopenta[b]indole (58)

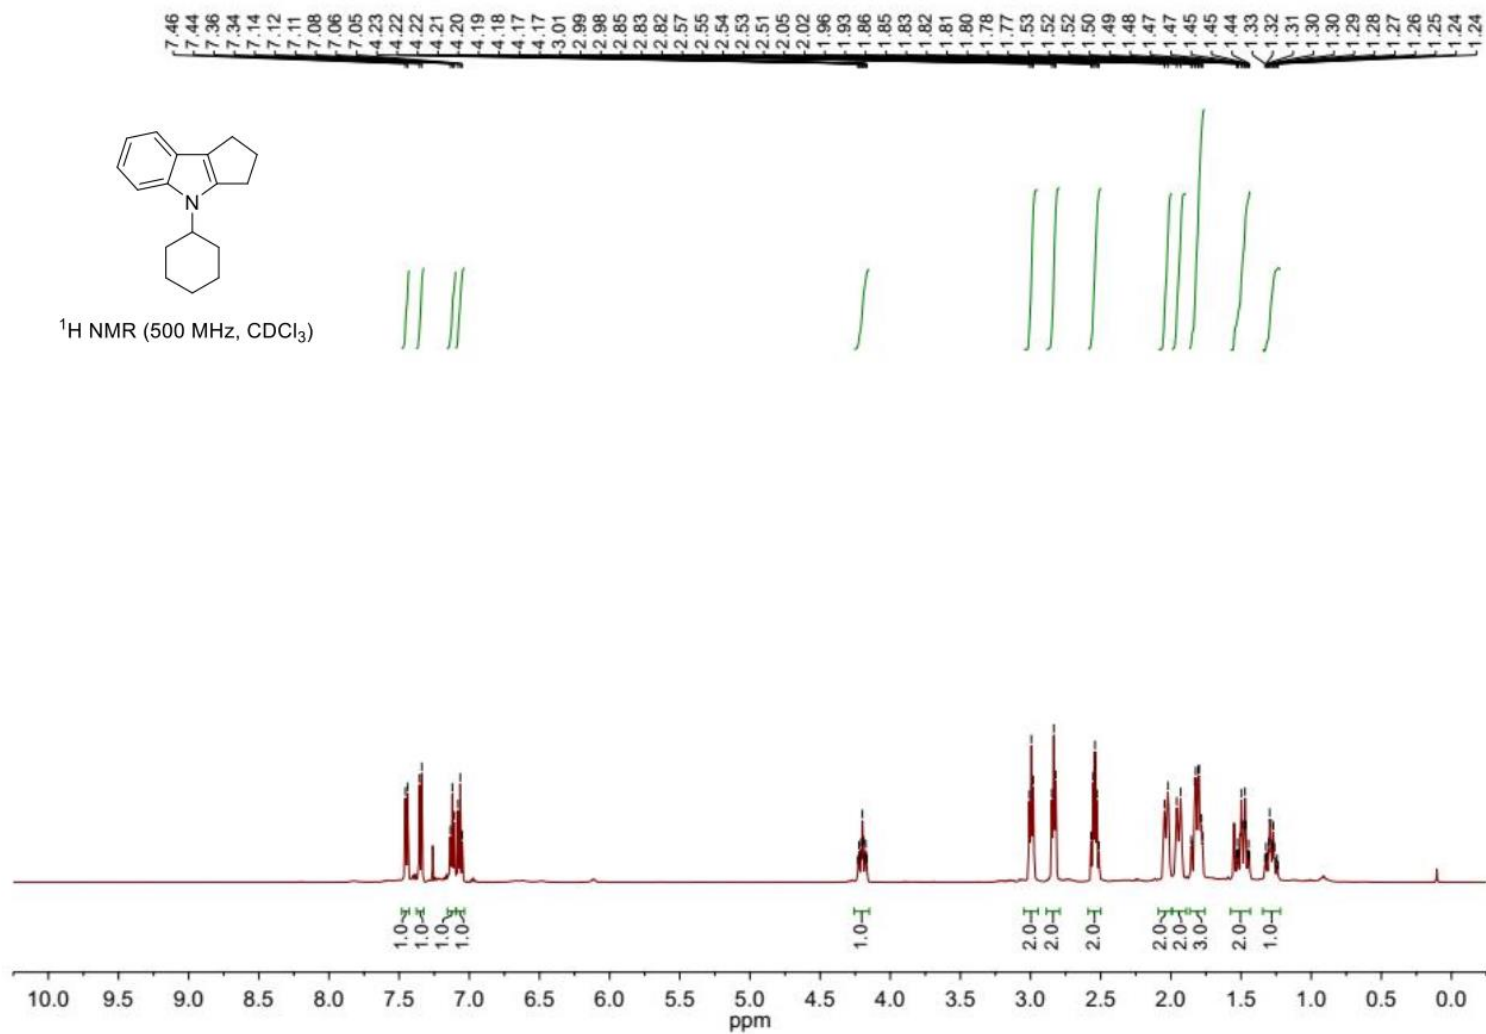

### 4-Cyclohexyl-1,2,3,4-tetrahydrocyclopenta[*b*]indole (58)

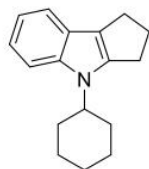

$^{13}\text{C}$  NMR (125 MHz,  $\text{CDCl}_3$ )

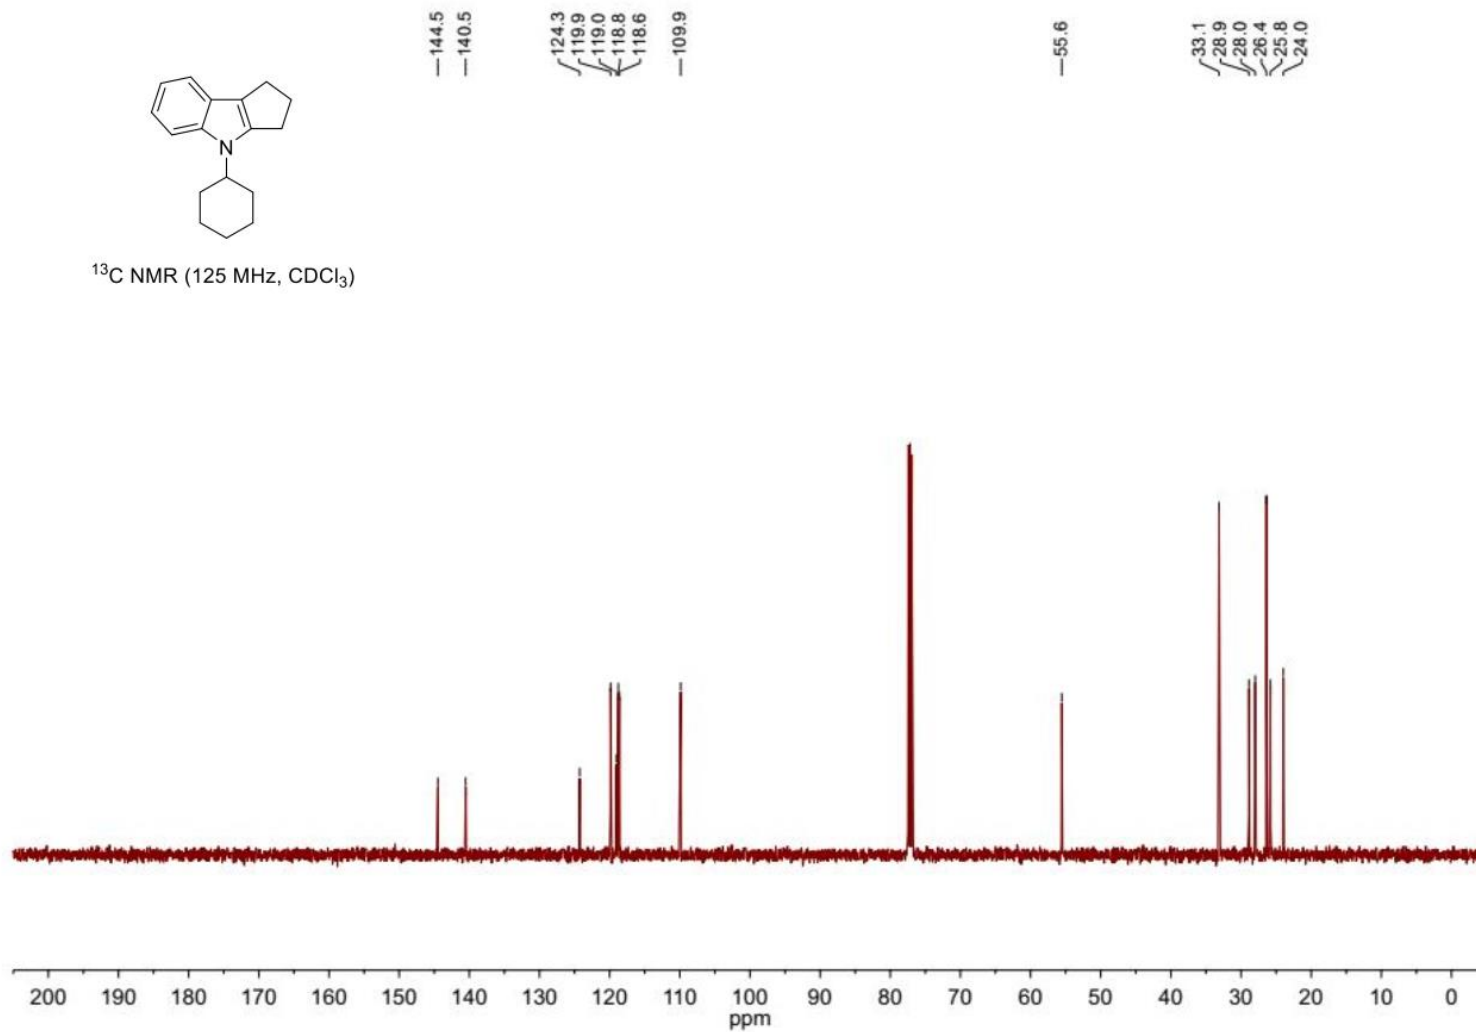

[Go back to table of contents](#)

3,6-Di-*tert*-butyl-9-(tetrahydro-2*H*-pyran-4-yl)-9*H*-carbazole (59)

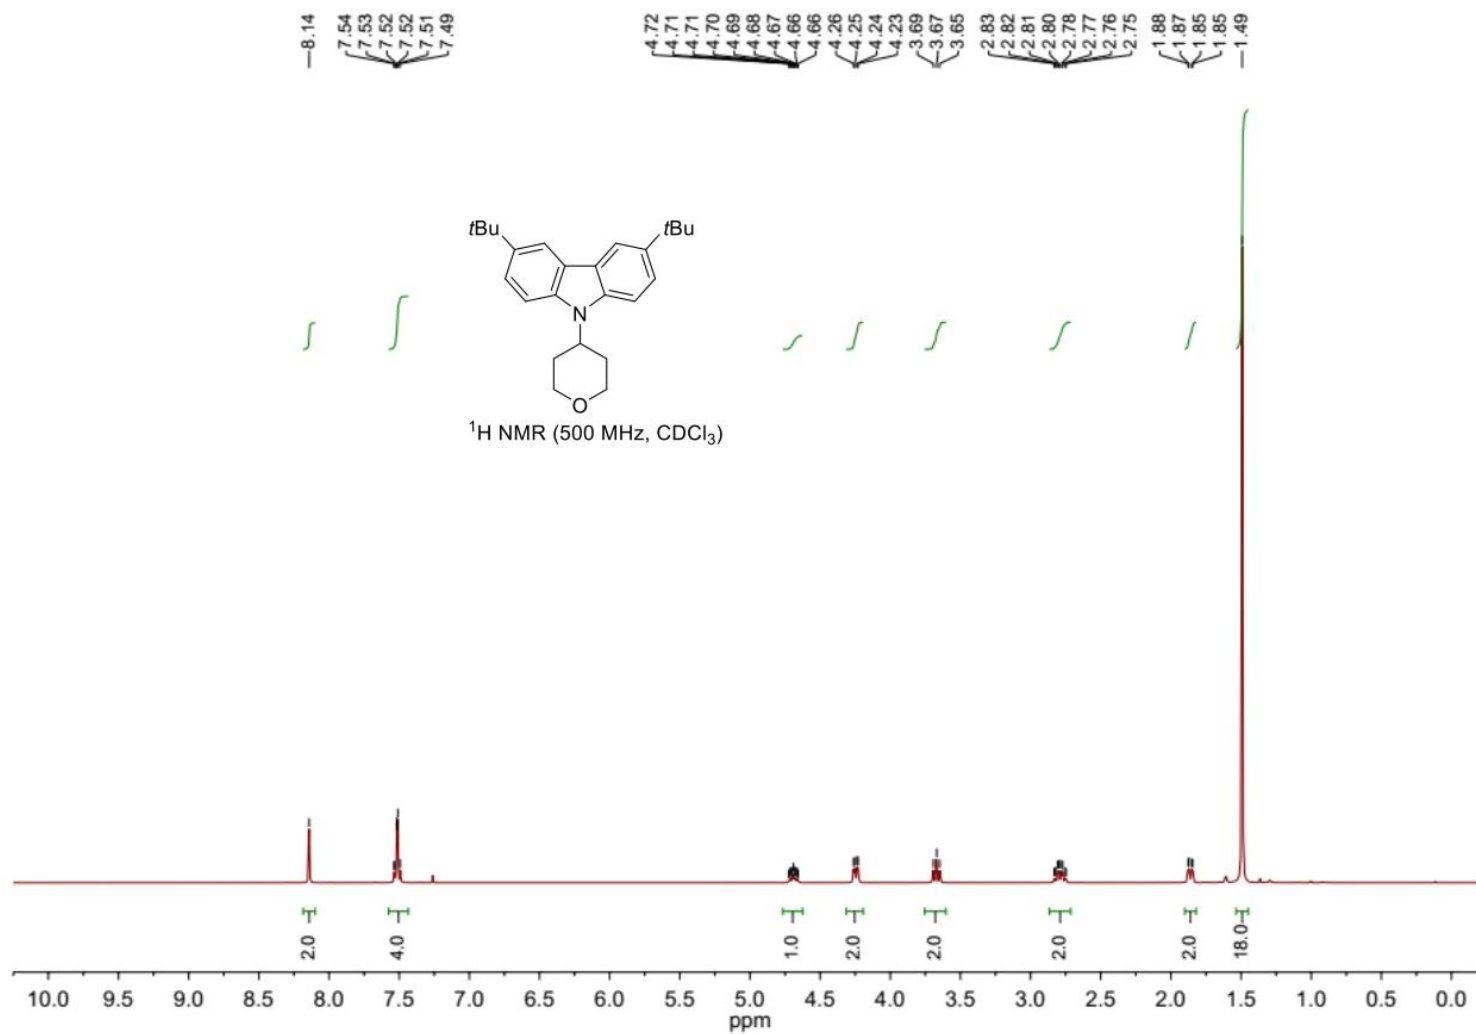

### 3,6-Di-*tert*-butyl-9-(tetrahydro-2*H*-pyran-4-yl)-9*H*-carbazole (59)

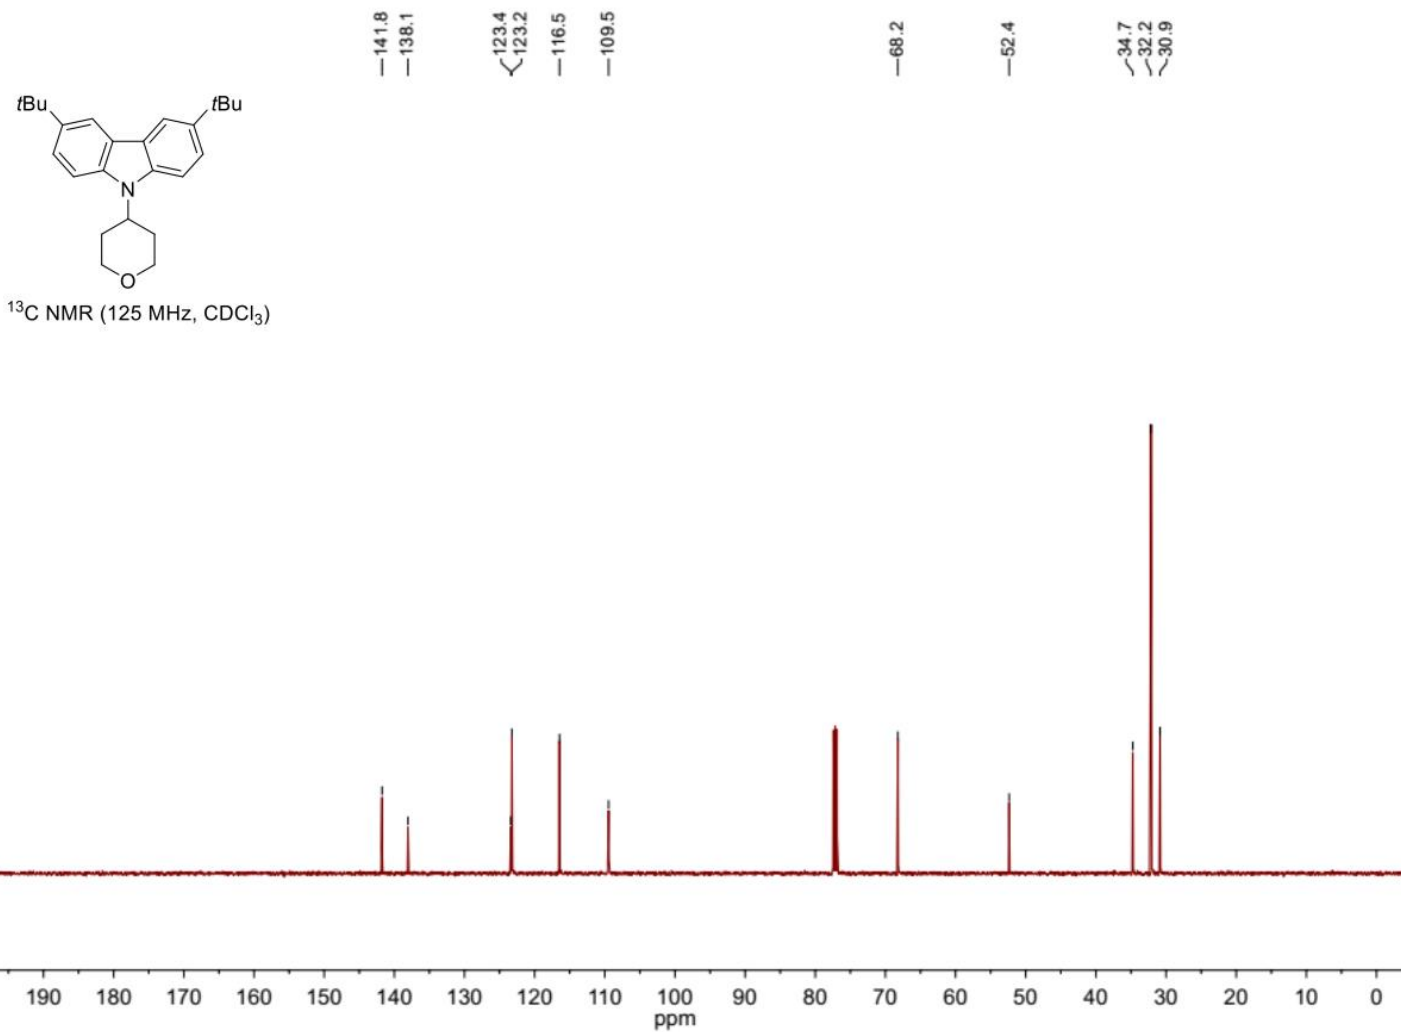

### N-Cyclohexyl-2-methylquinolin-8-amine (60)

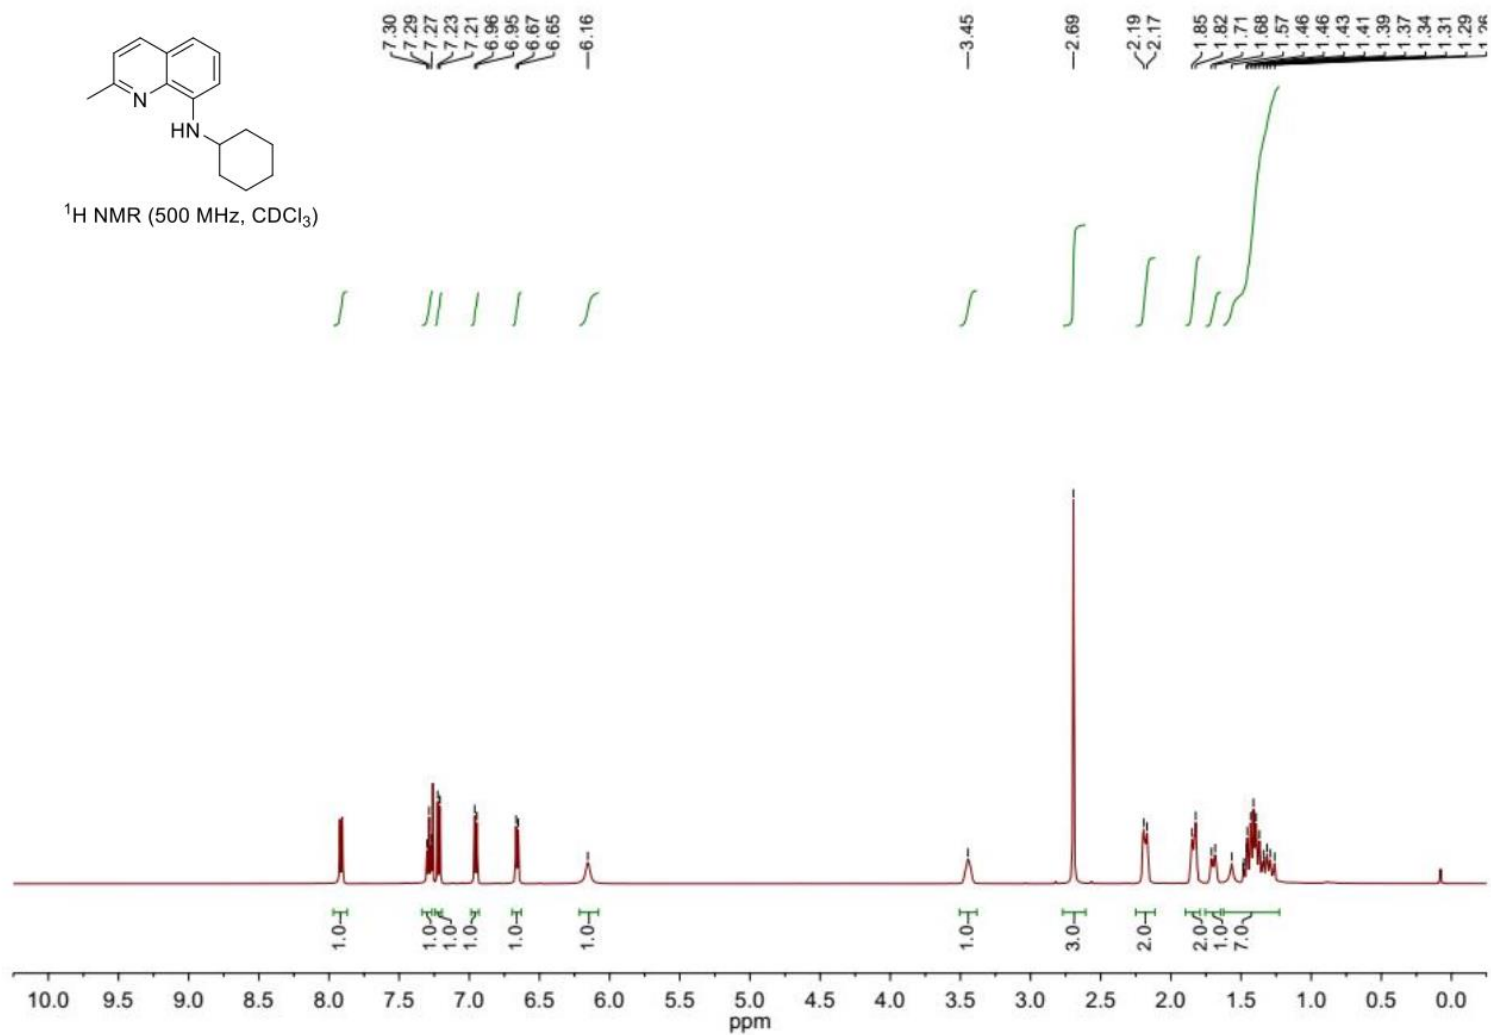

### N-Cyclohexyl-2-methylquinolin-8-amine (60)

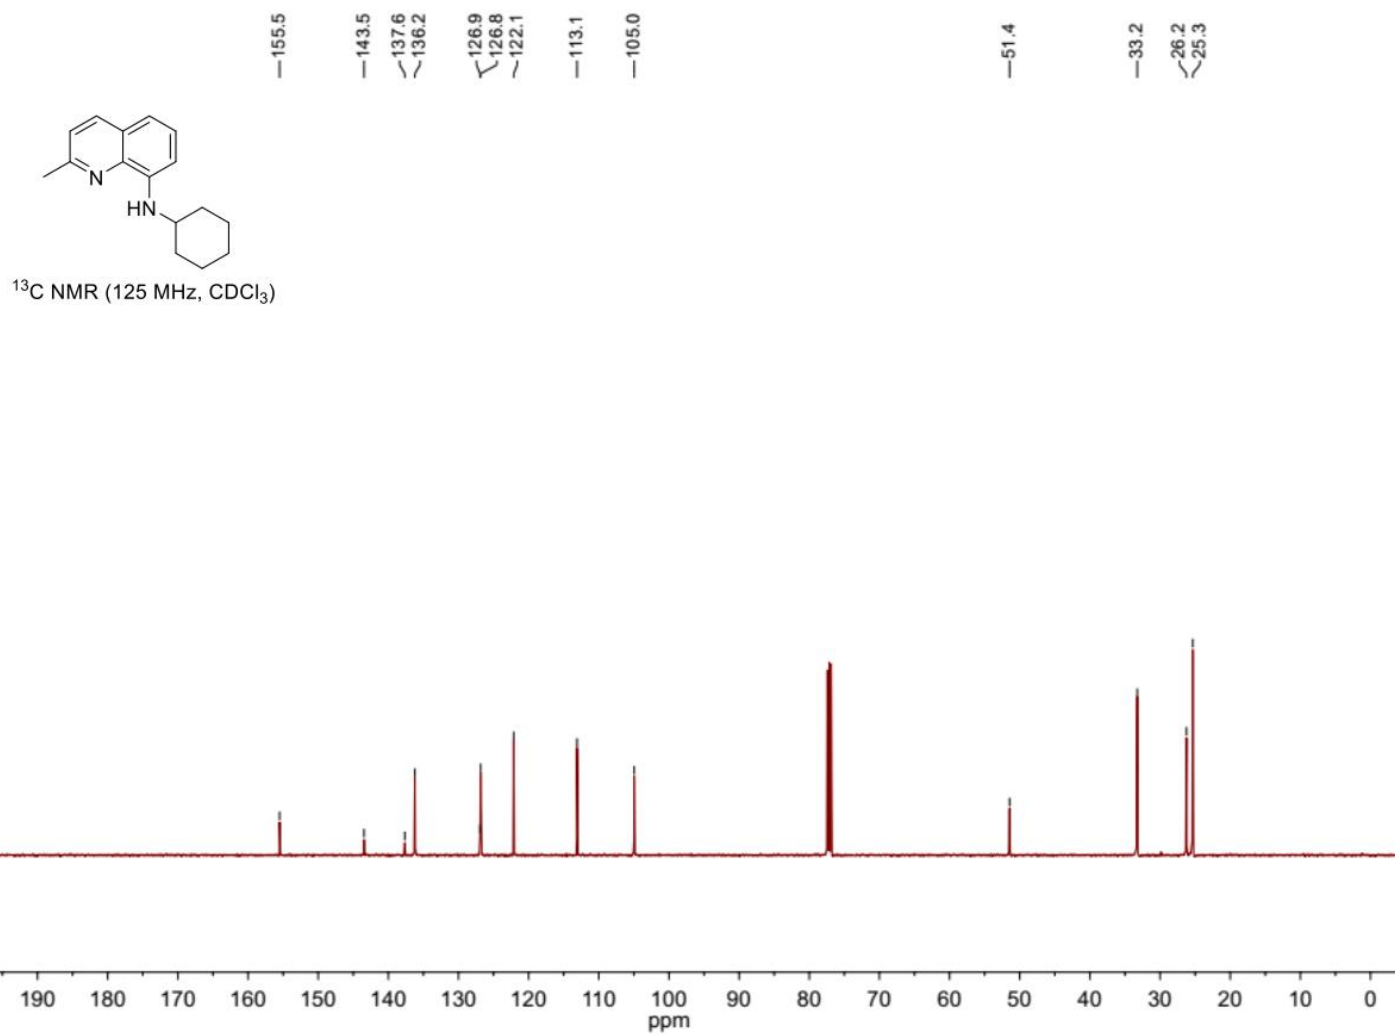



### N-Methylquinolin-5-amine (61)

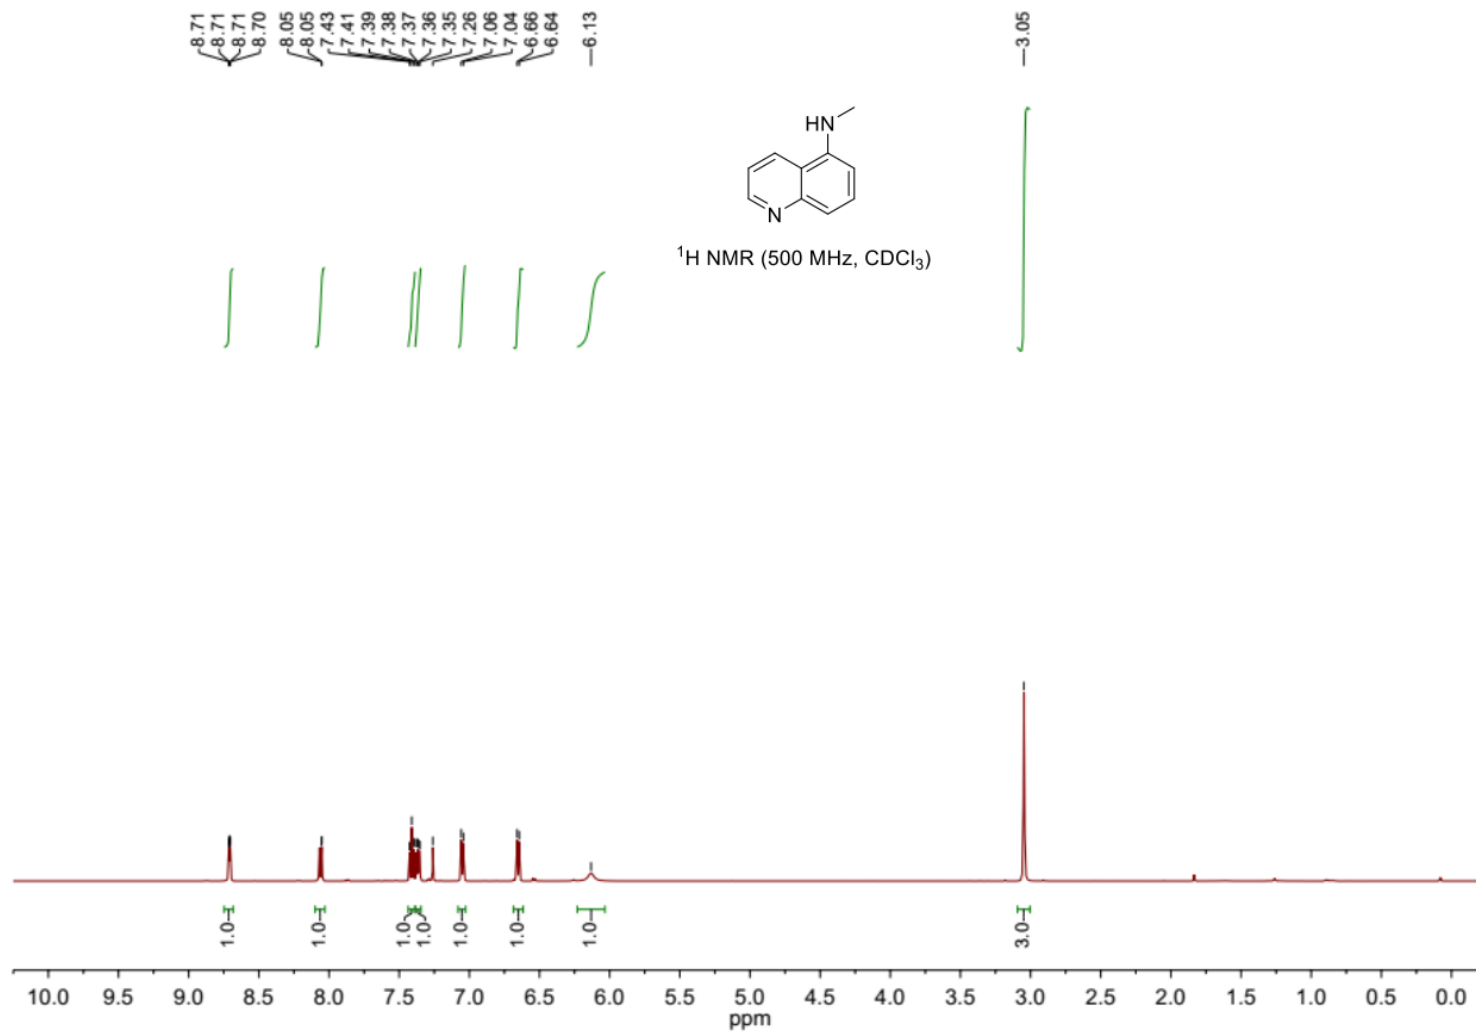

### N-Methylquinolin-5-amine (61)

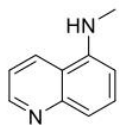

<sup>13</sup>C NMR (125 MHz, CDCl<sub>3</sub>)

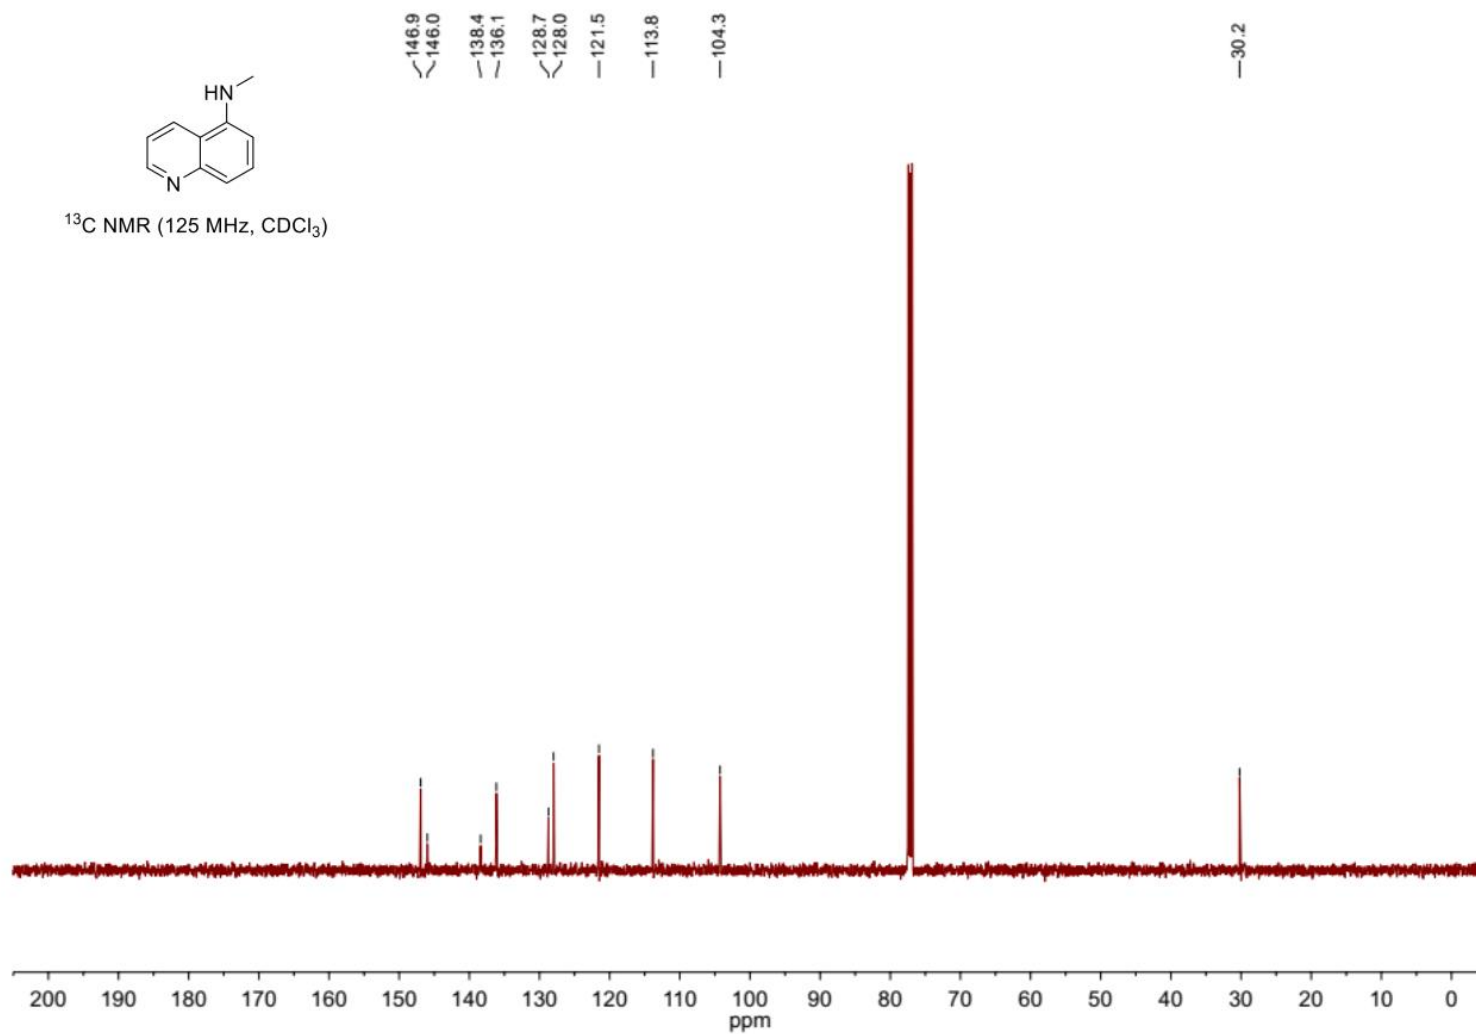

[Go back to table of contents](#)

### N-Isobutylquinolin-5-amine (62)

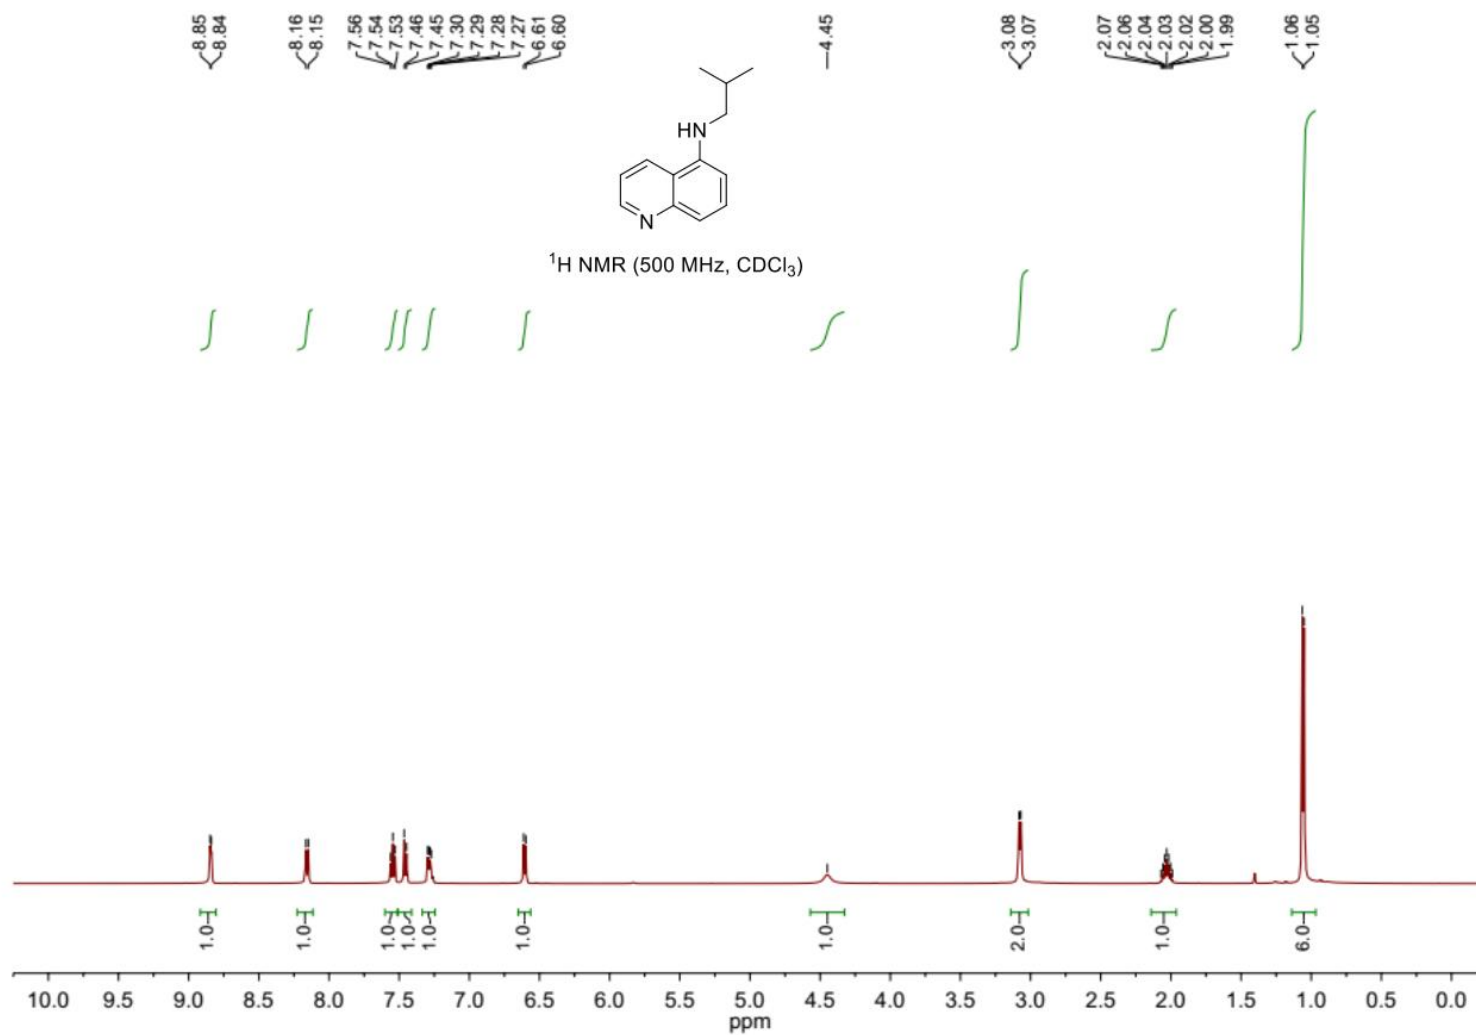

[Go back to table of contents](#)

### *N*-Isobutylquinolin-5-amine (62)

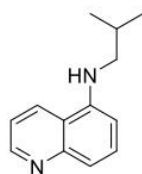

$^{13}\text{C}$  NMR (125 MHz,  $\text{CDCl}_3$ )

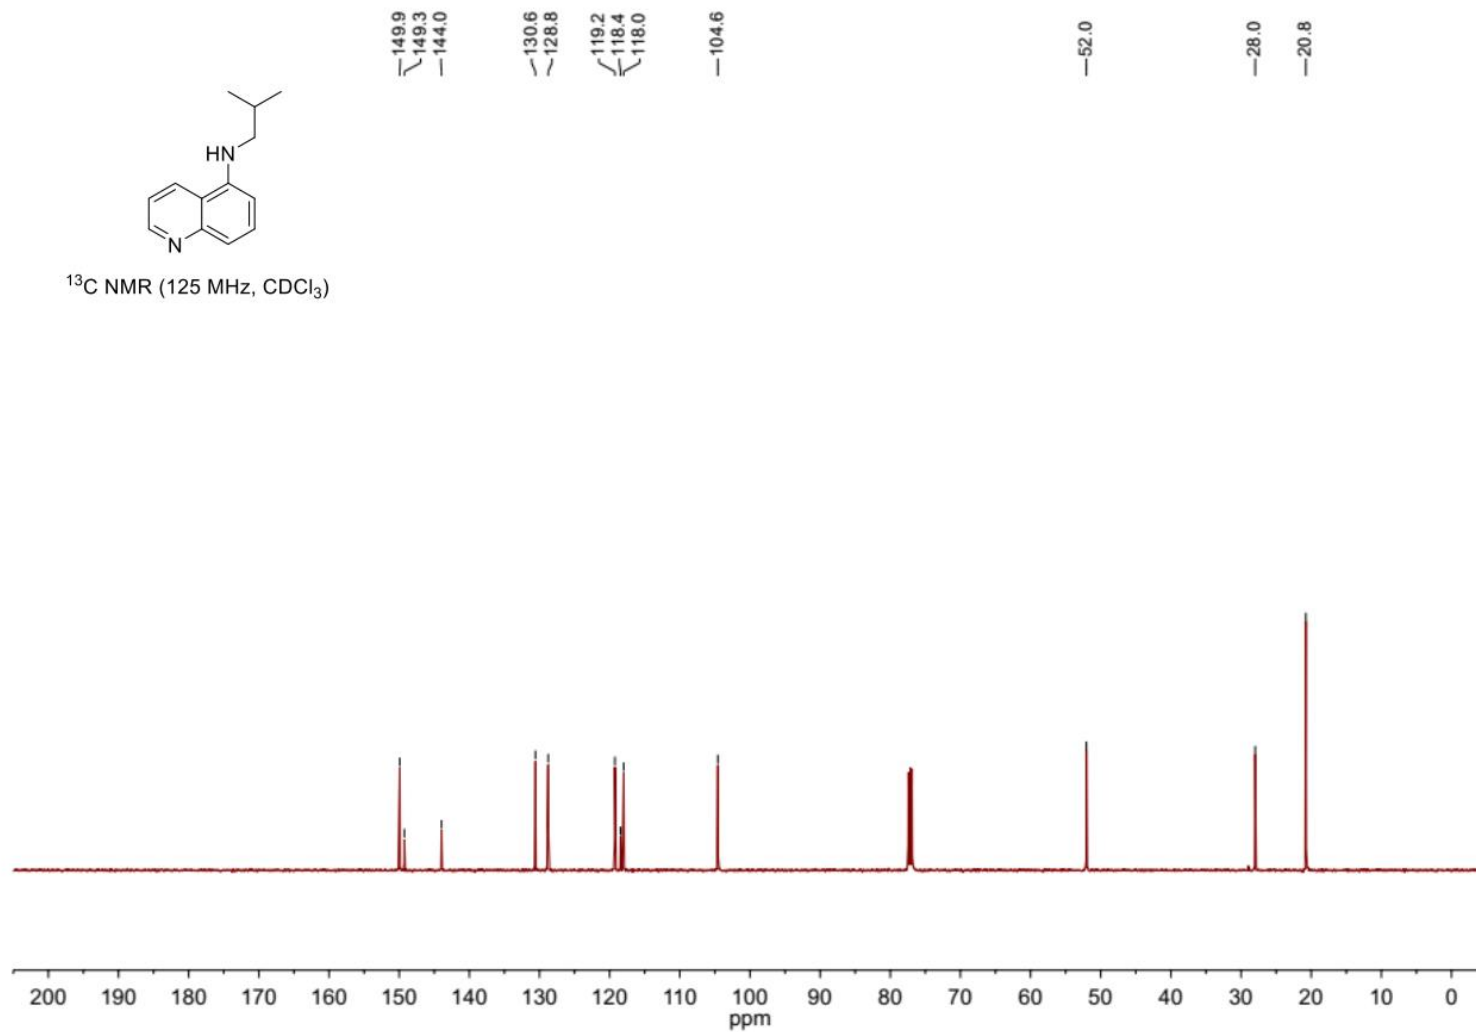

[Go back to table of contents](#)

### N-Isobutylquinolin-8-amine (63)

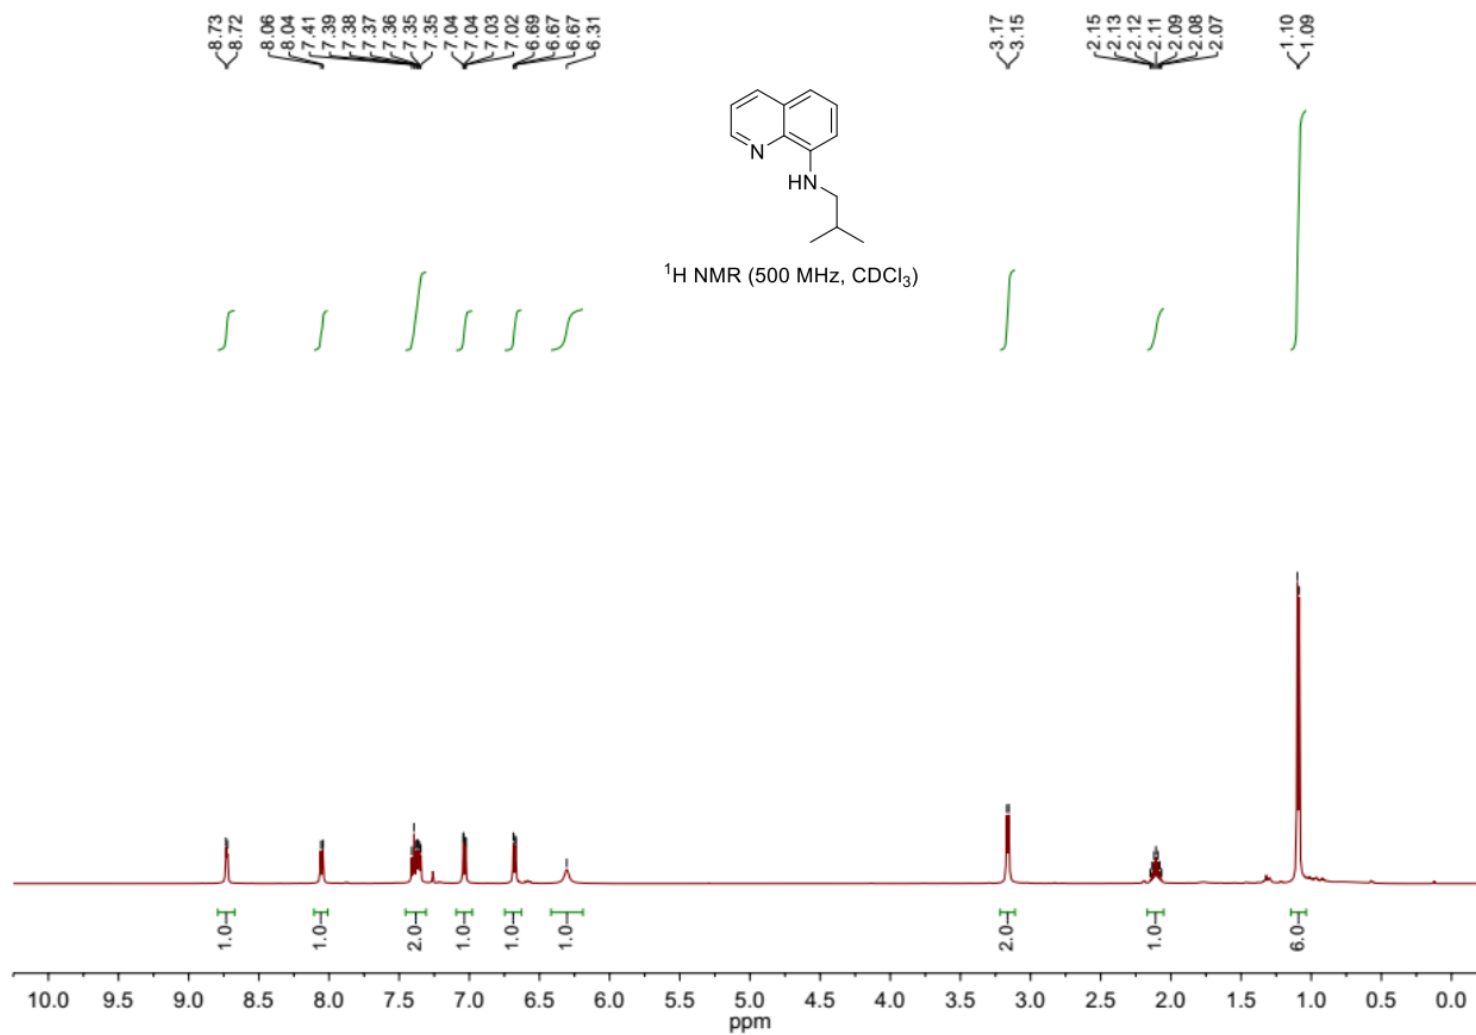

### N-Isobutylquinolin-8-amine (63)

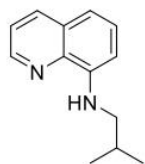

<sup>13</sup>C NMR (125 MHz, CDCl<sub>3</sub>)

146.8  
145.2  
138.3  
136.1  
128.8  
127.9  
121.4  
113.4  
104.5  
51.4  
28.1  
20.8

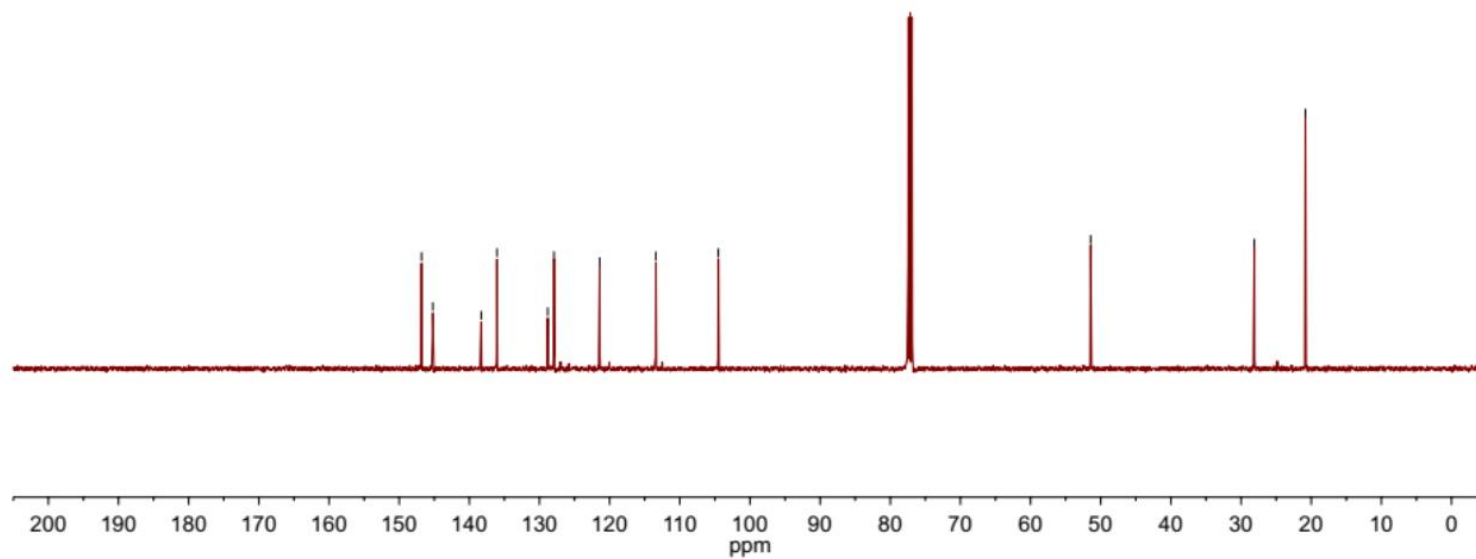

[Go back to table of contents](#)

### 3-Methyl-1-(tetrahydro-2H-pyran-4-yl)-1H-indazole (64)

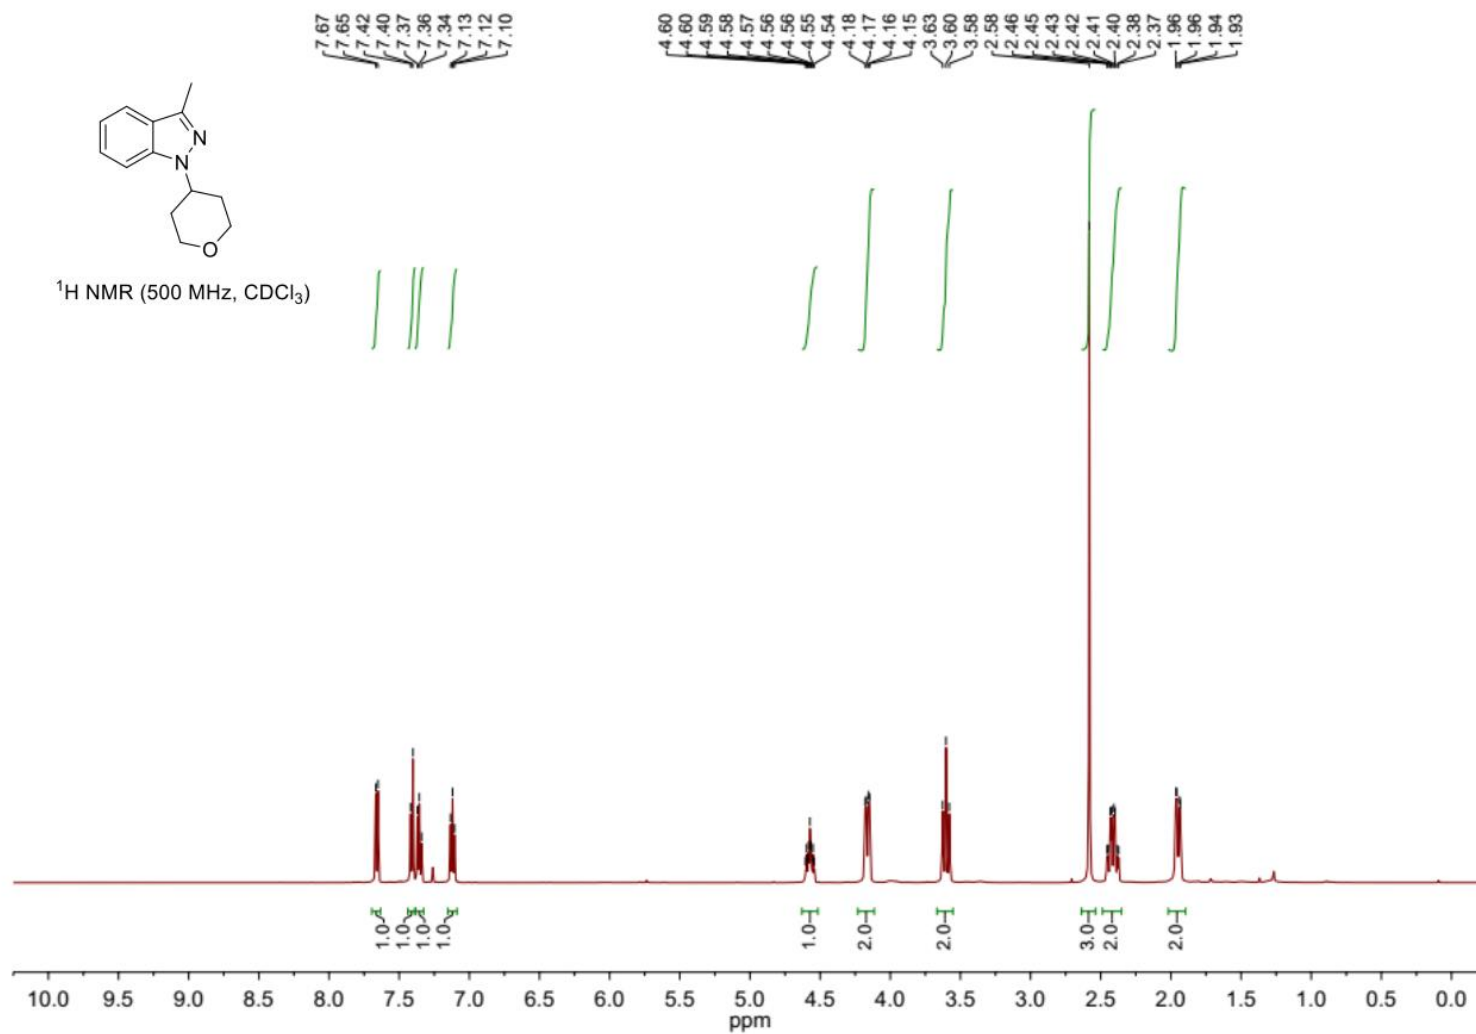

### 3-Methyl-1-(tetrahydro-2H-pyran-4-yl)-1H-indazole (64)

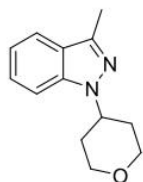

<sup>13</sup>C NMR (125 MHz, CDCl<sub>3</sub>)

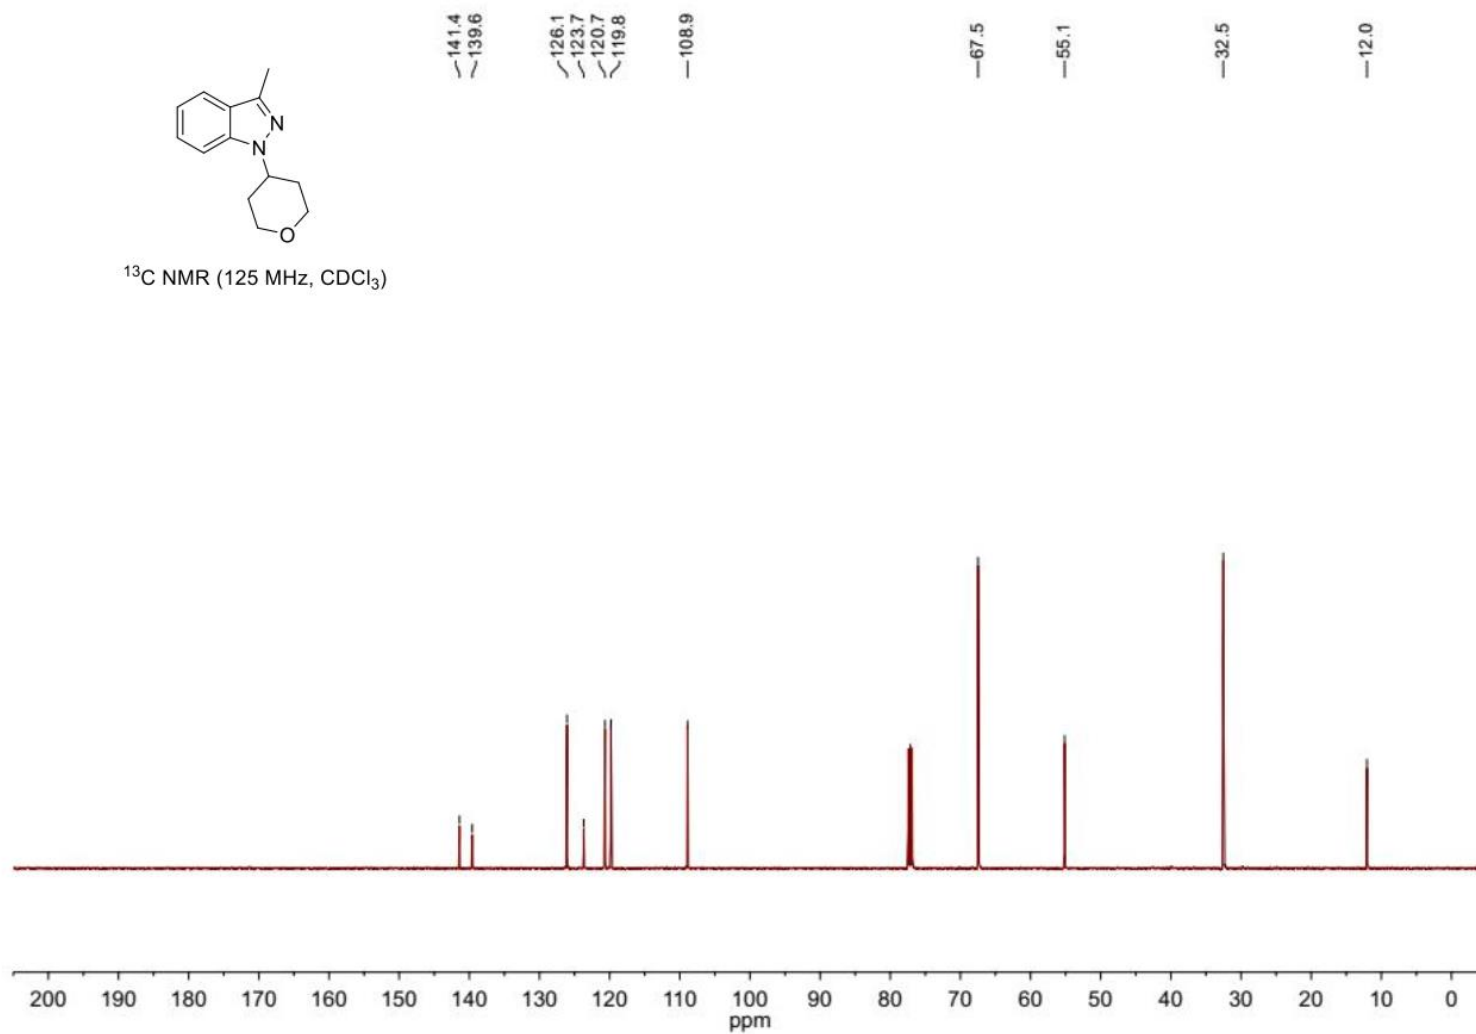

[Go back to table of contents](#)



1-(Tetrahydro-2H-pyran-4-yl)-1H-indazole (65)

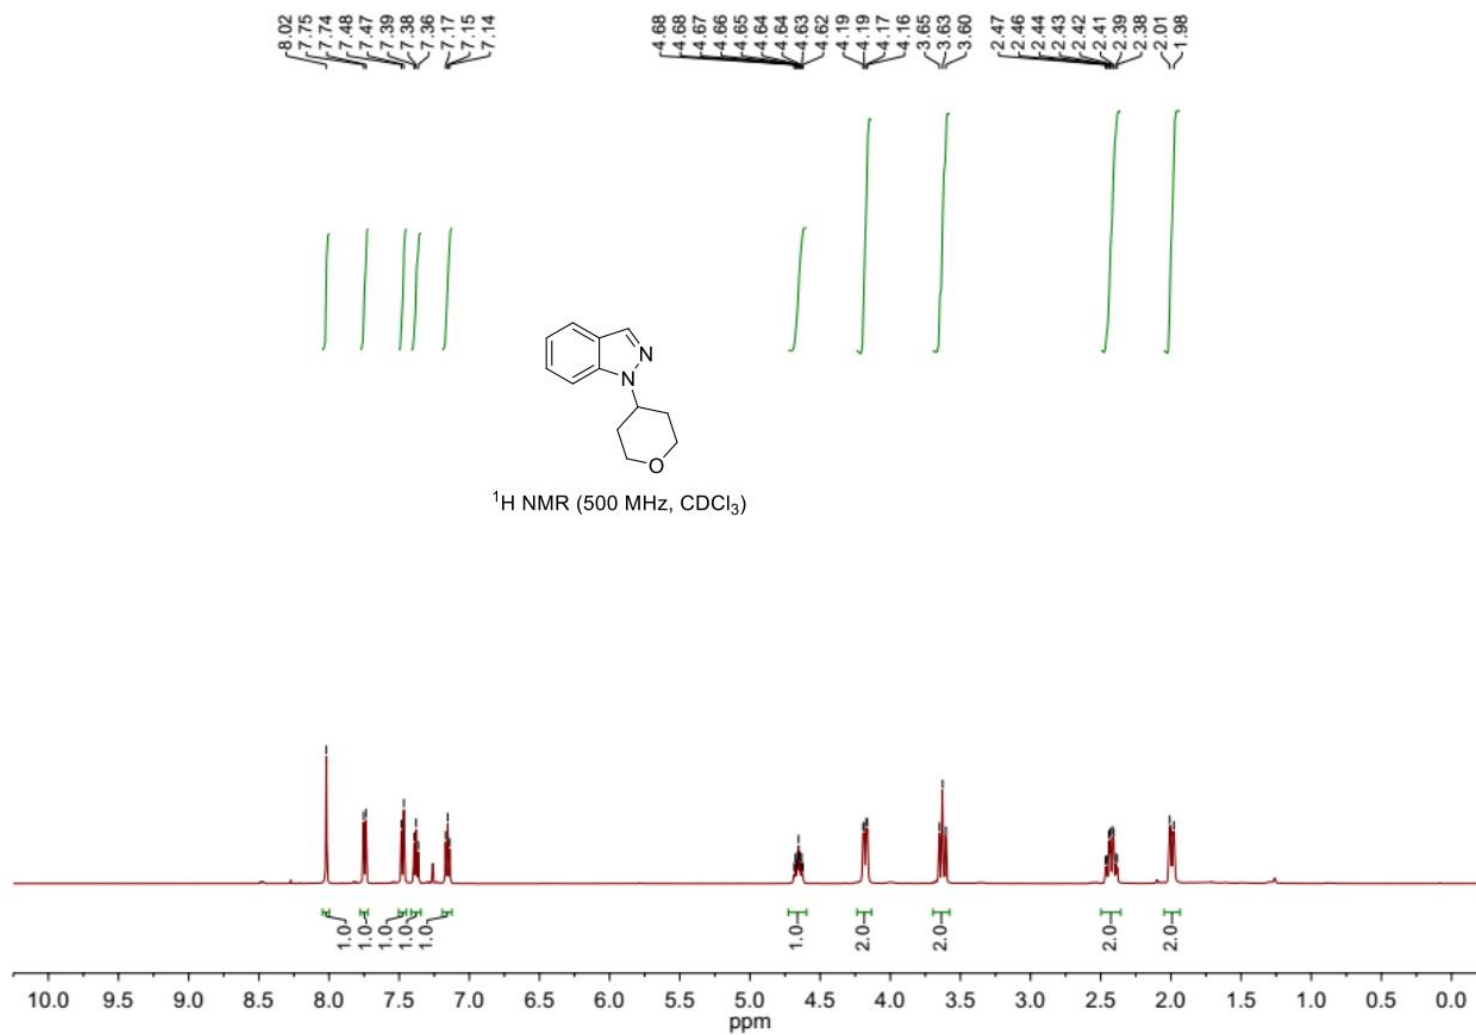

### 1-(Tetrahydro-2H-pyran-4-yl)-1H-indazole (65)

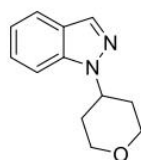

<sup>13</sup>C NMR (125 MHz, CDCl<sub>3</sub>)

—138.7  
—133.1  
—126.1  
—124.4  
—121.4  
—120.7  
—109.0  
—67.4  
—55.3  
—32.5

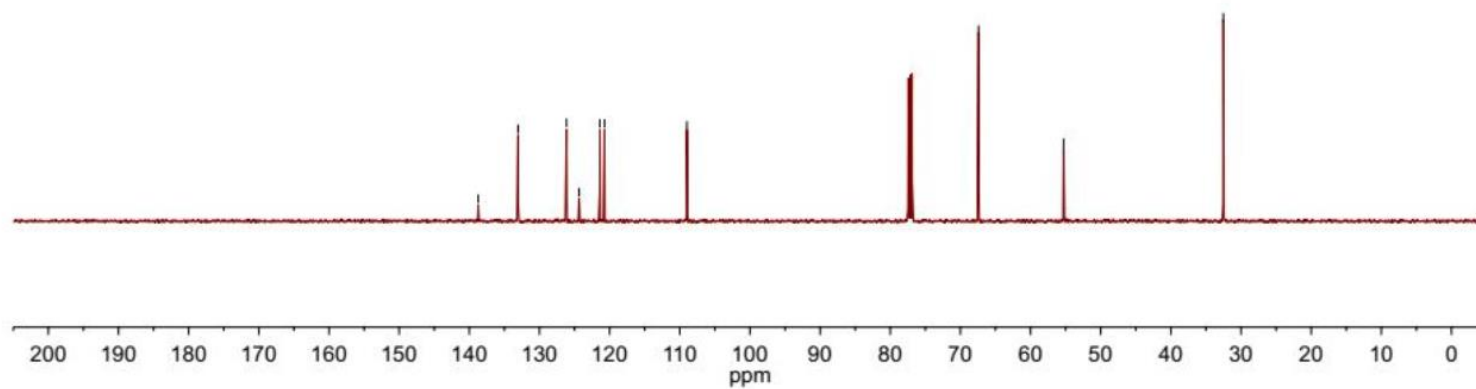

[Go back to table of contents](#)

# Methyl 2-(pentadecylamino)thiophene-3-carboxylate (66)

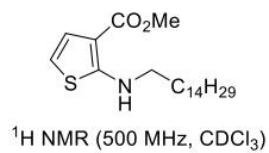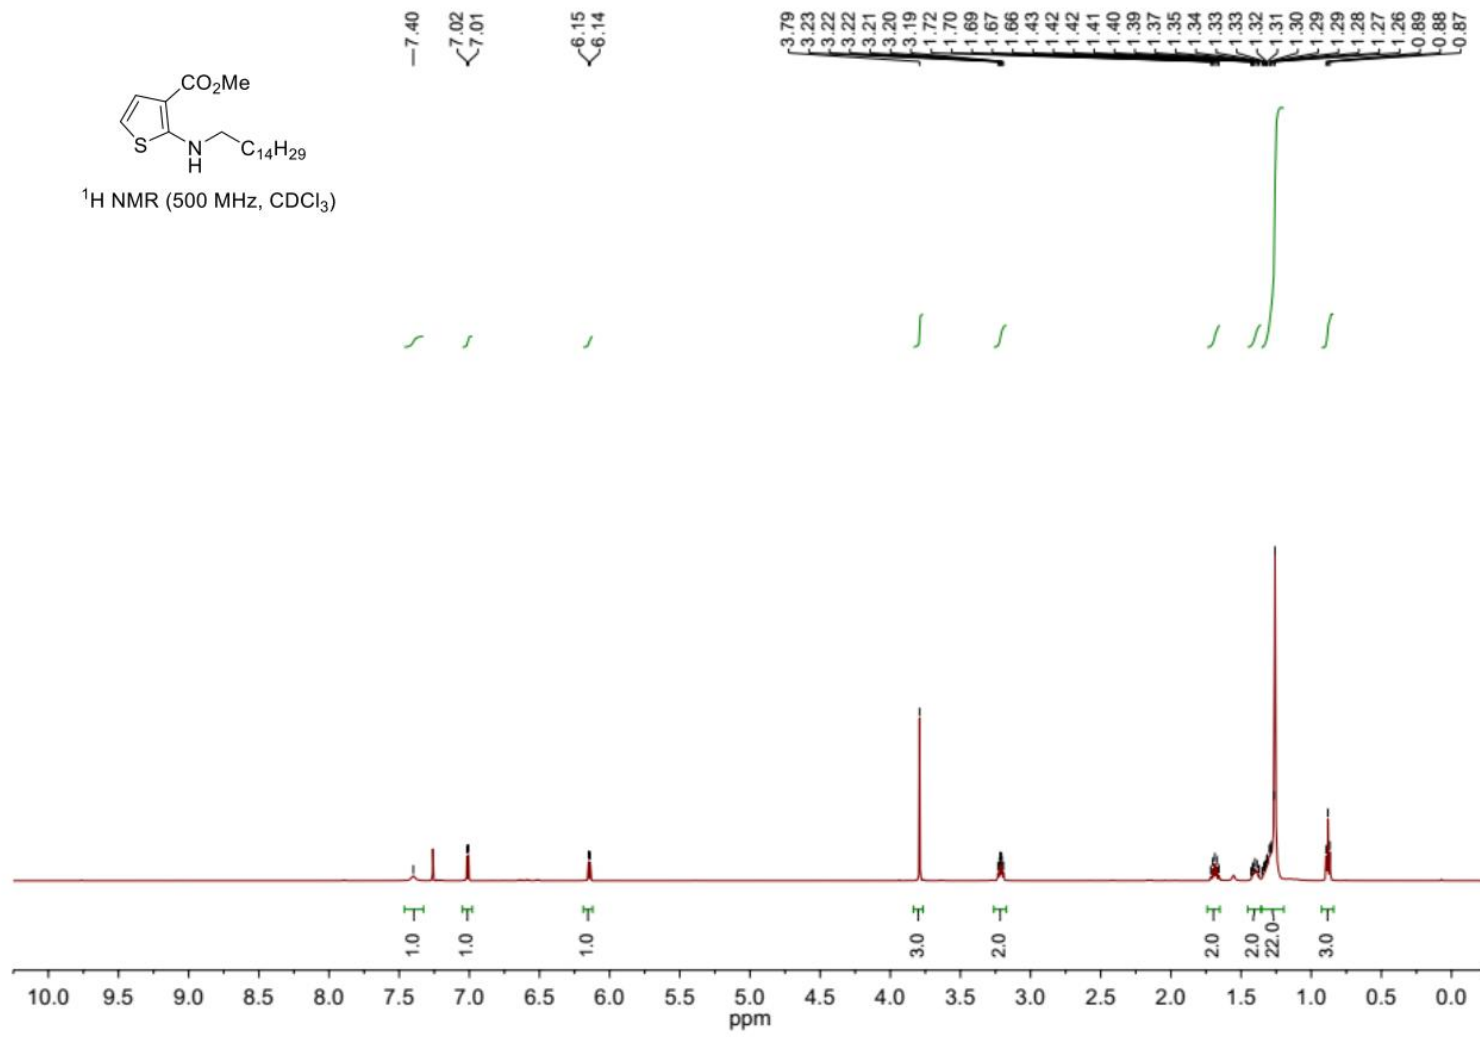

### Methyl 2-(pentadecylamino)thiophene-3-carboxylate (66)

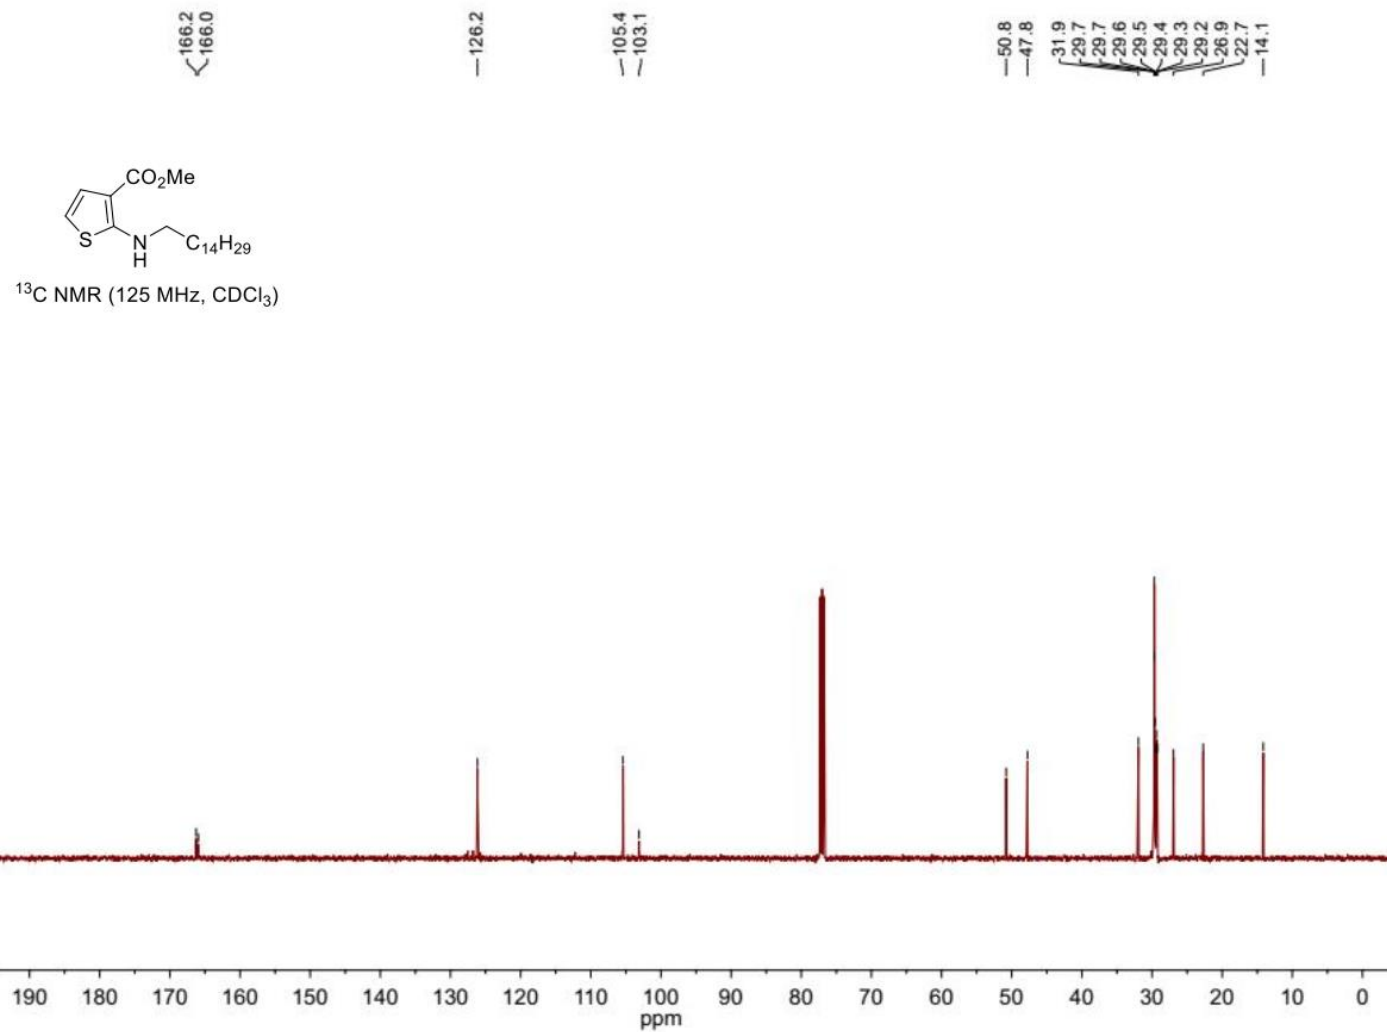

[Go back to table of contents](#)

# Diethyl 3-methyl-5-((tetrahydro-2H-pyran-4-yl)amino)thiophene-2,4-dicarboxylate (67)

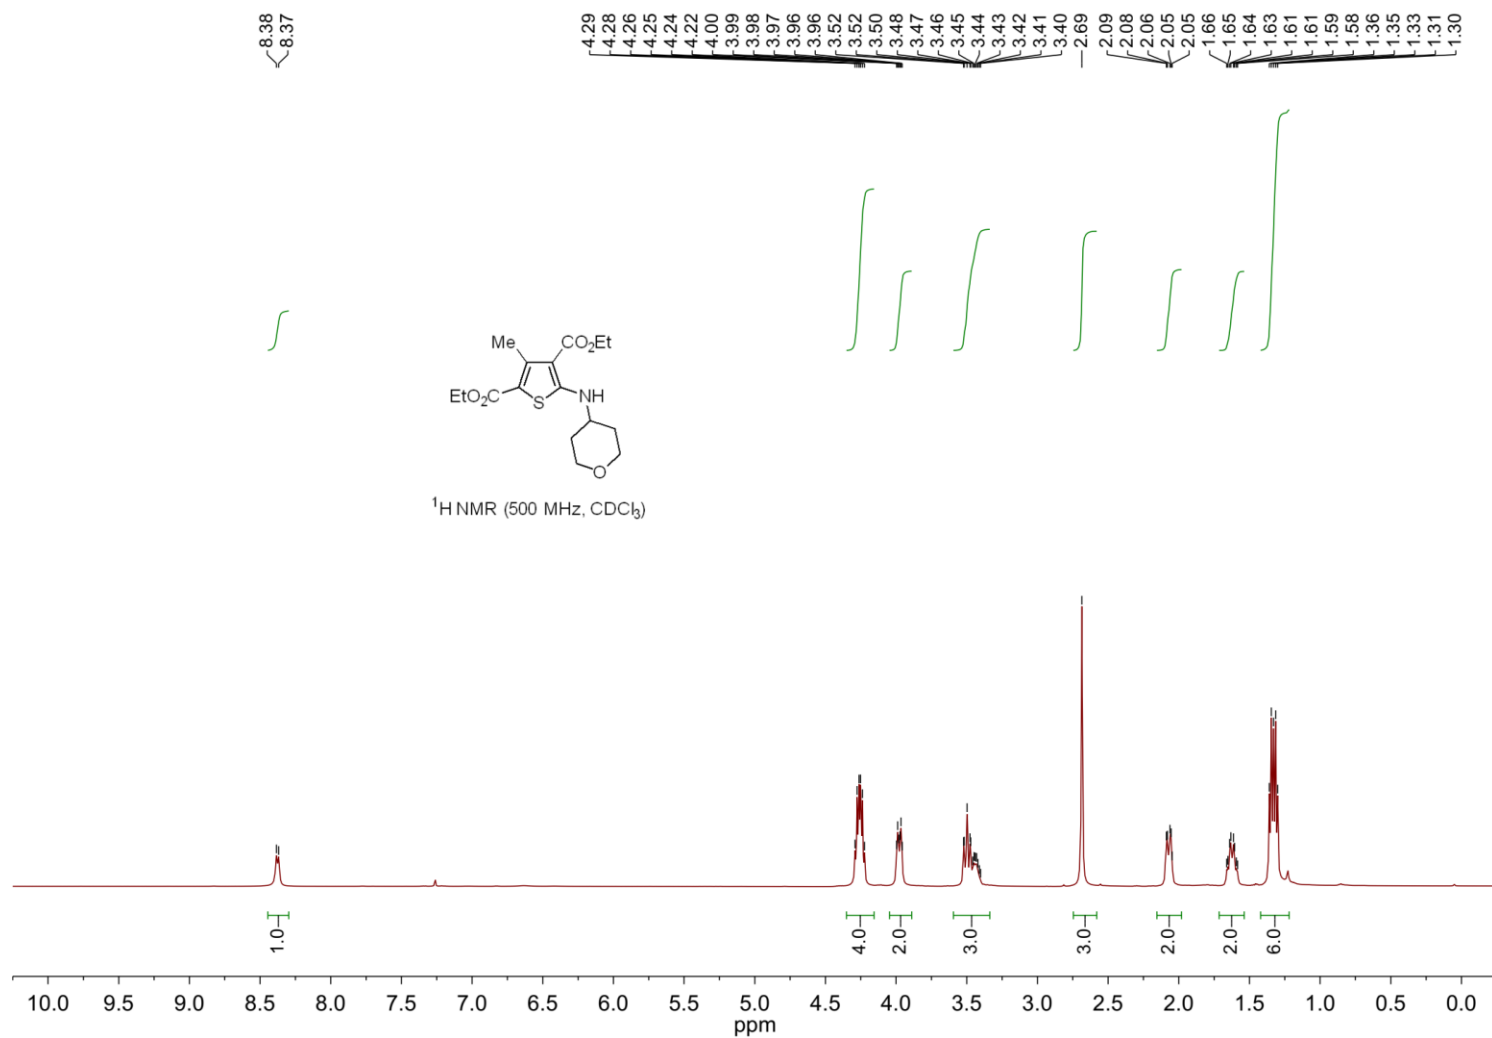

Diethyl 3-methyl-5-((tetrahydro-2H-pyran-4-yl)amino)thiophene-2,4-dicarboxylate (67)

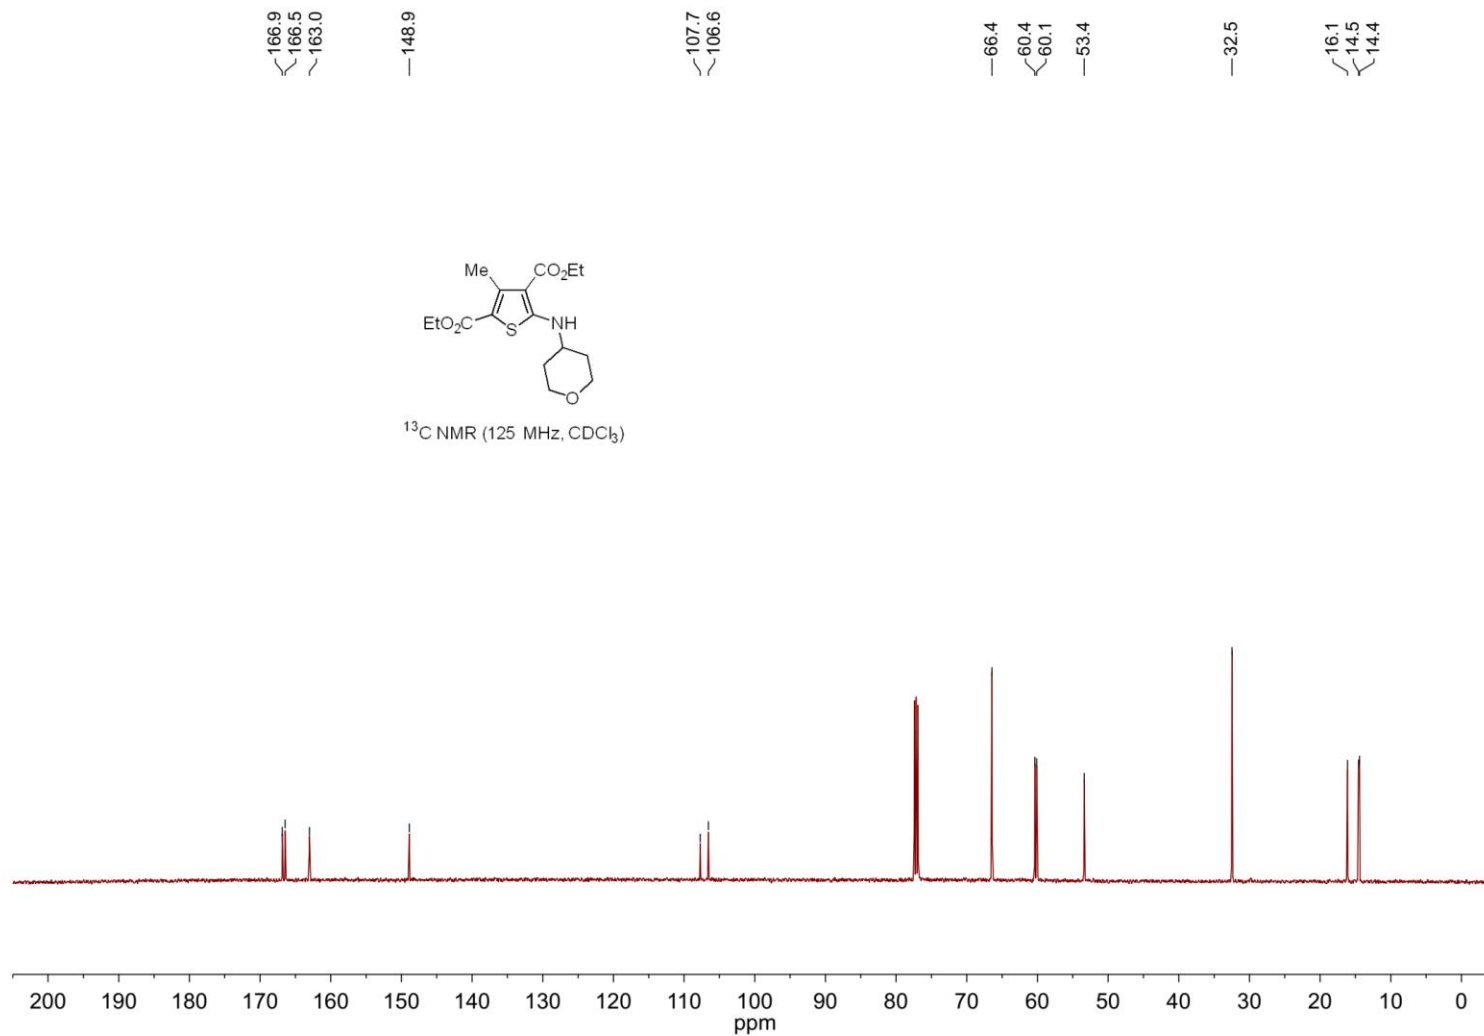

[Go back to table of contents](#)

Ethyl 2-((tetrahydro-2H-pyran-4-yl)amino)-5,6,7,8-tetrahydro-4H-cyclohepta[b]thiophene-3-carboxylate (68)

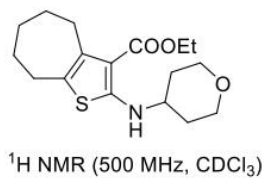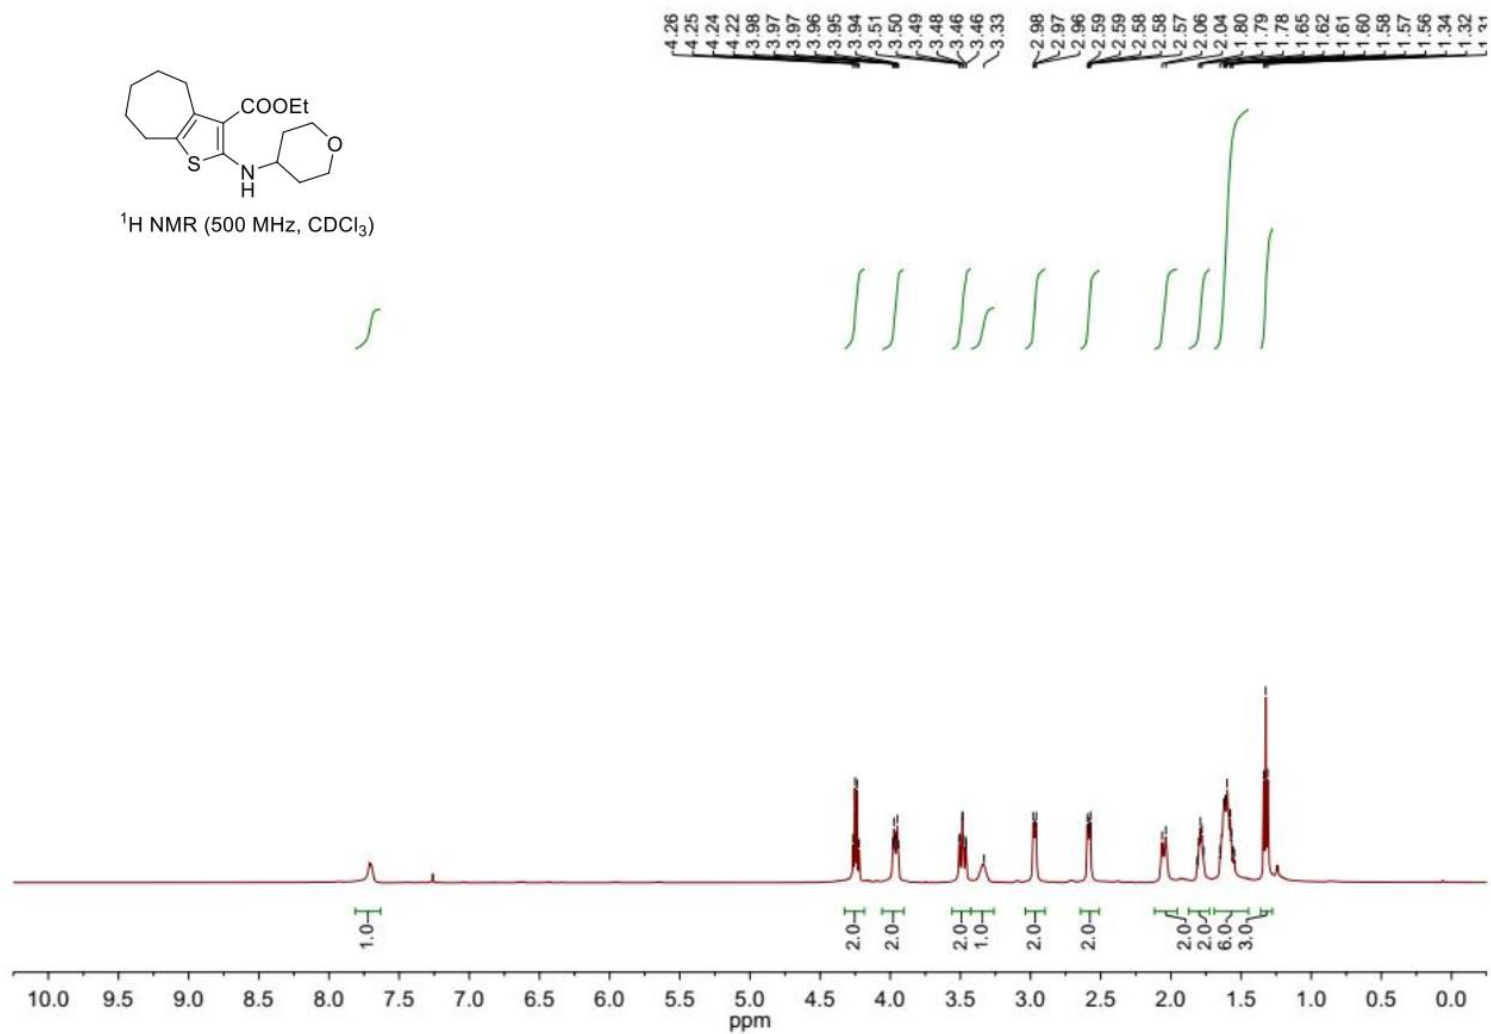

Ethyl 2-((tetrahydro-2H-pyran-4-yl)amino)-5,6,7,8-tetrahydro-4H-cyclohepta[b]thiophene-3-carboxylate (68)

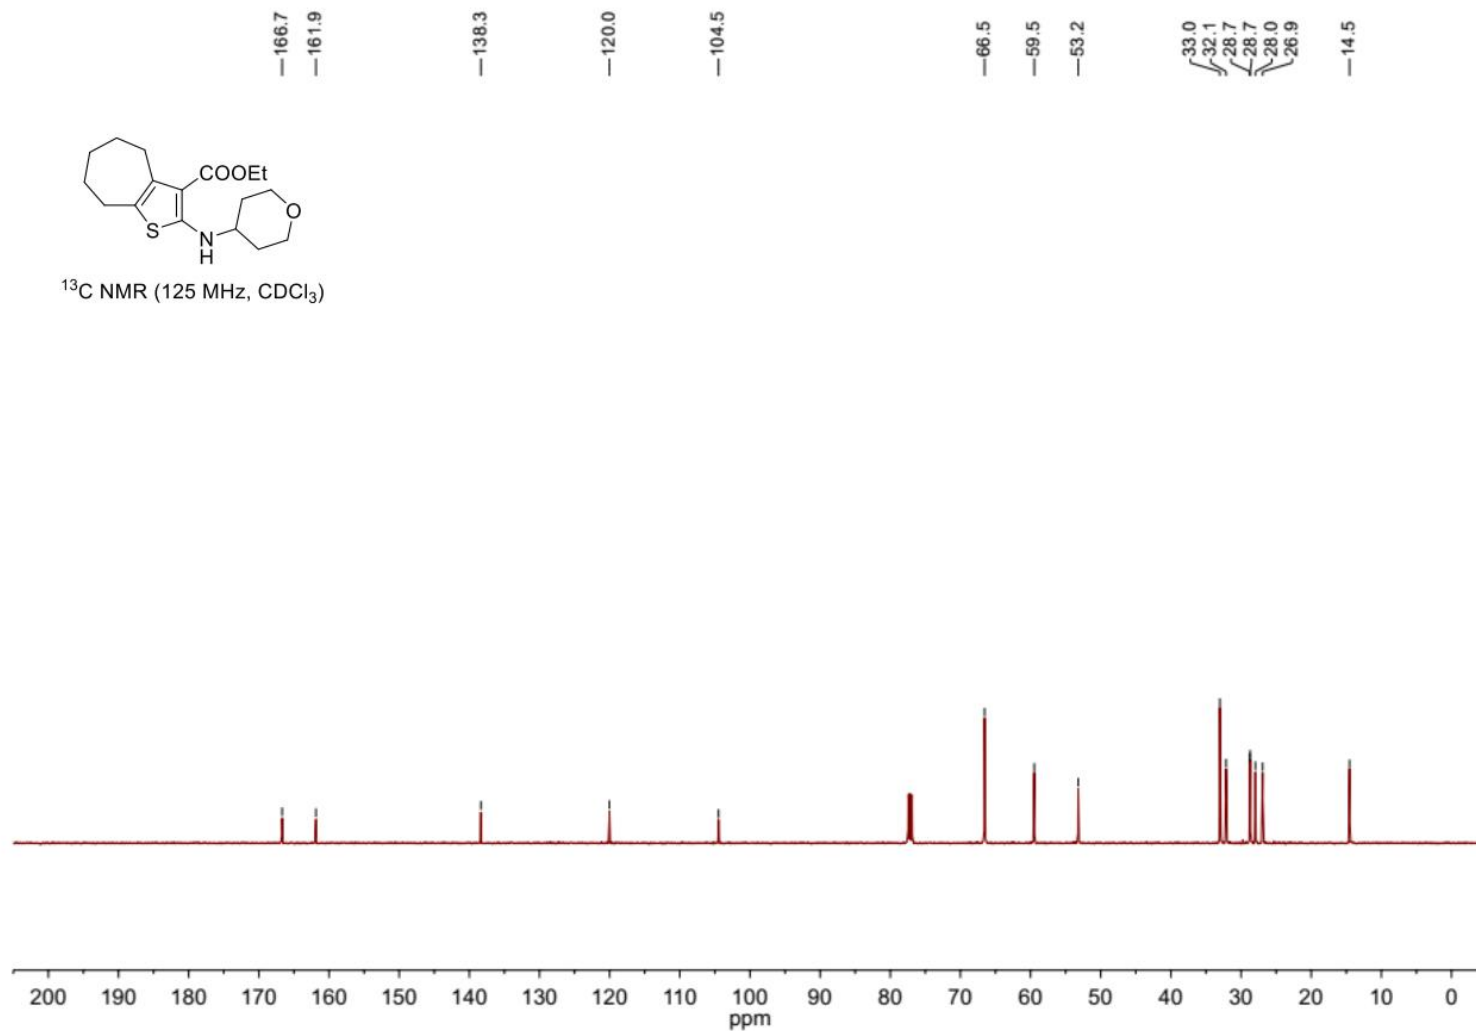



### 3-Ethyl-3-(4-(nonylamino)phenyl)piperidine-2,6-dione (69)

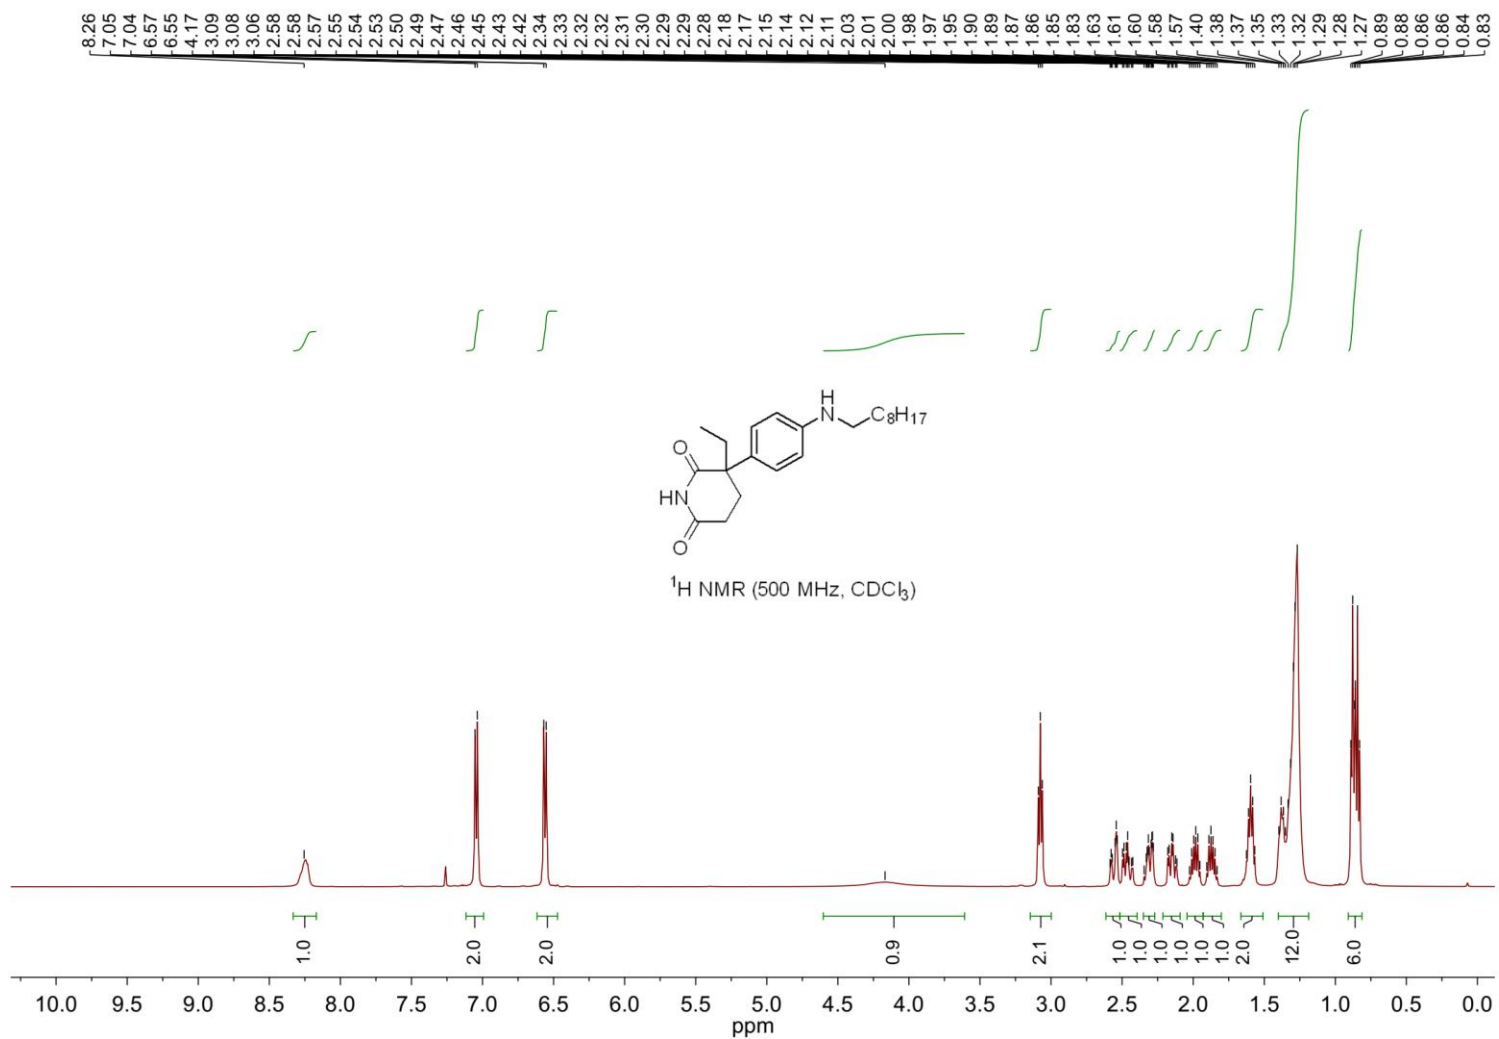

### 3-Ethyl-3-(4-(nonylamino)phenyl)piperidine-2,6-dione (69)

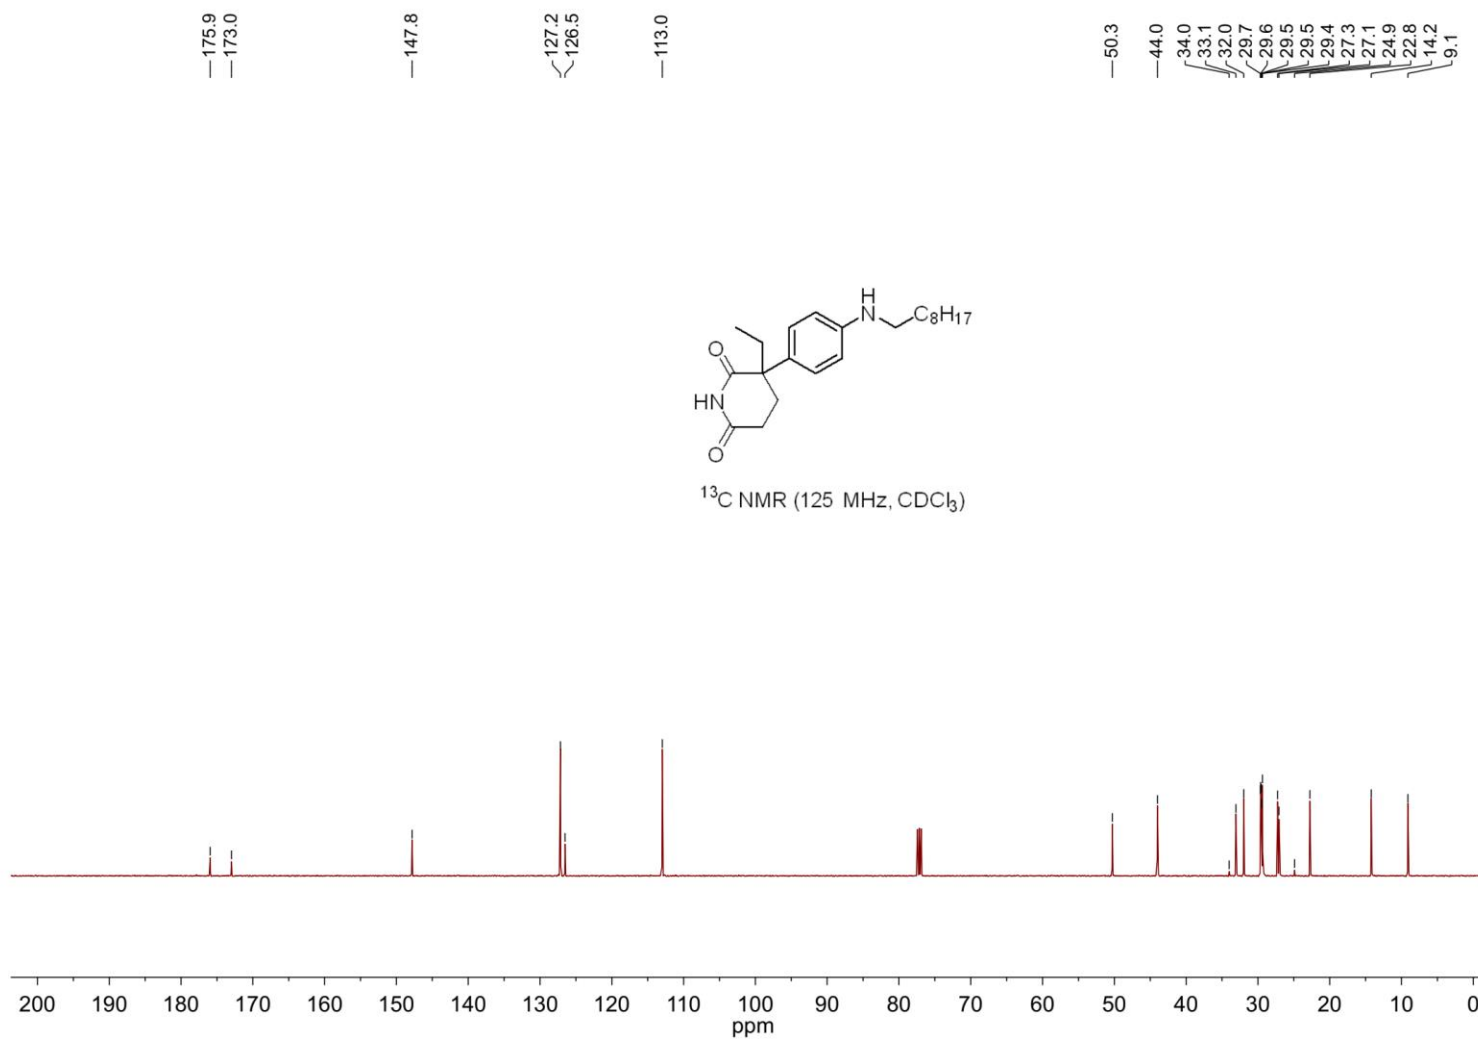

[Go back to table of contents](#)

### 3-Ethyl-3-(4-(pentylamino)phenyl)piperidine-2,6-dione (70)

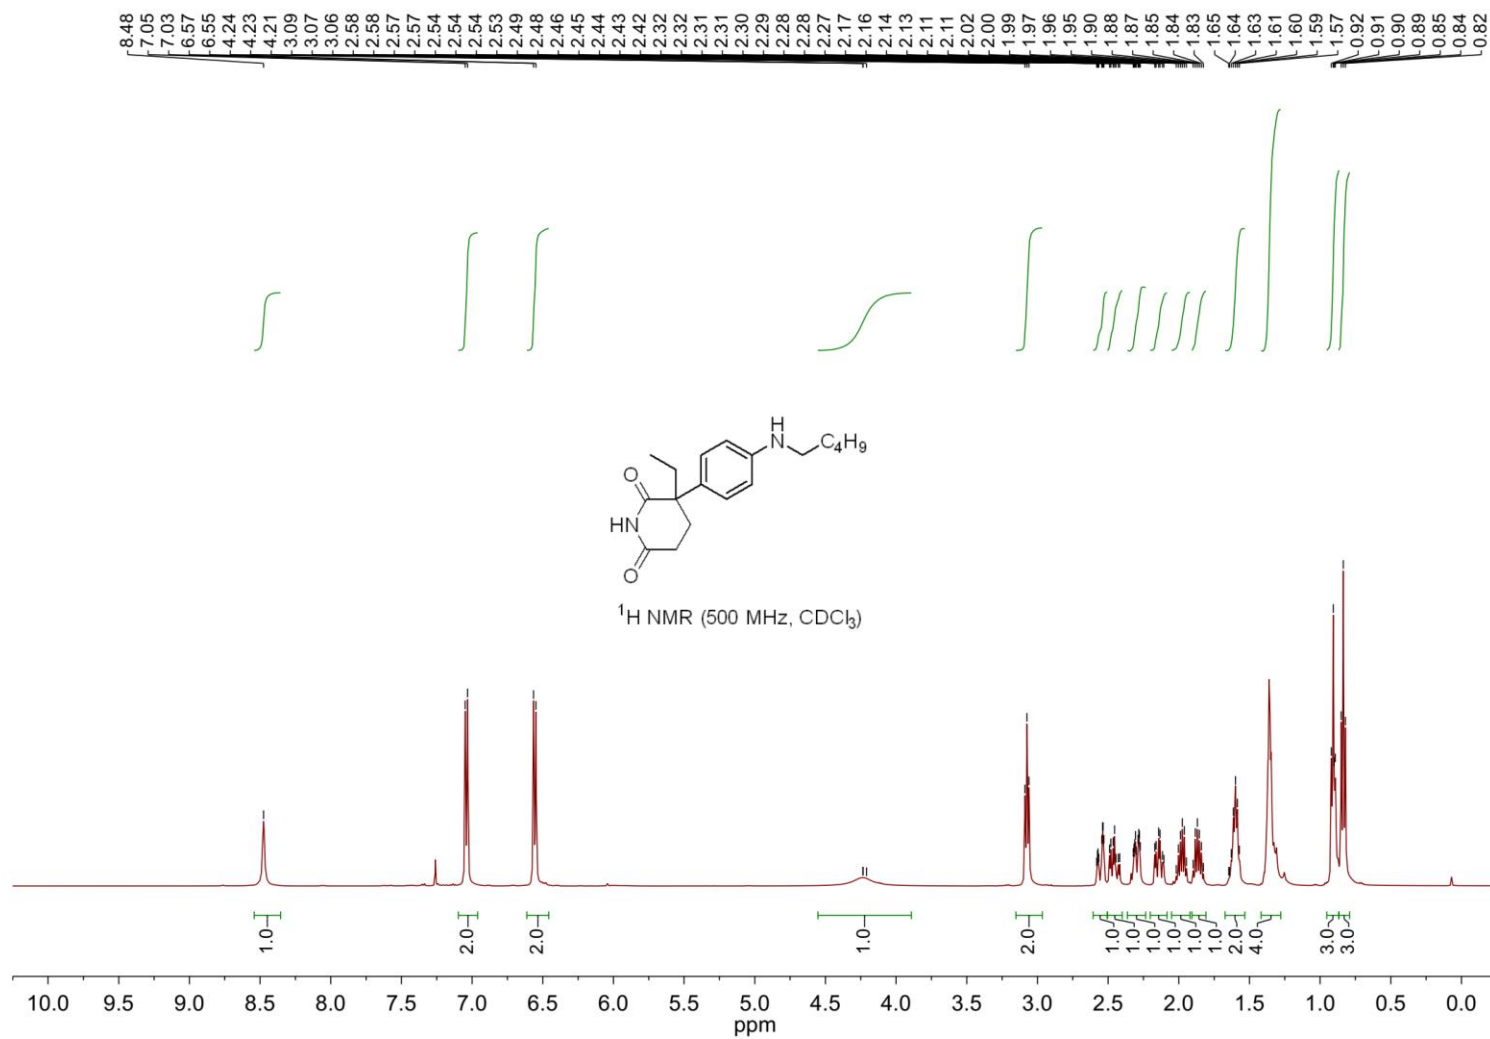

### 3-Ethyl-3-(4-(pentylamino)phenyl)piperidine-2,6-dione (70)

—176.1  
—173.2

—147.8

—127.1  
—126.5

—112.9

—50.2

—43.9

—33.0

—29.4

—29.4

—29.3

—27.0

—22.6

—14.1

—9.1

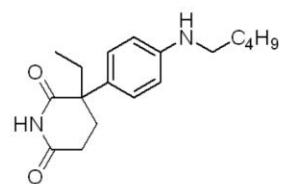

$^{13}\text{C}$  NMR (125 MHz,  $\text{CDCl}_3$ )

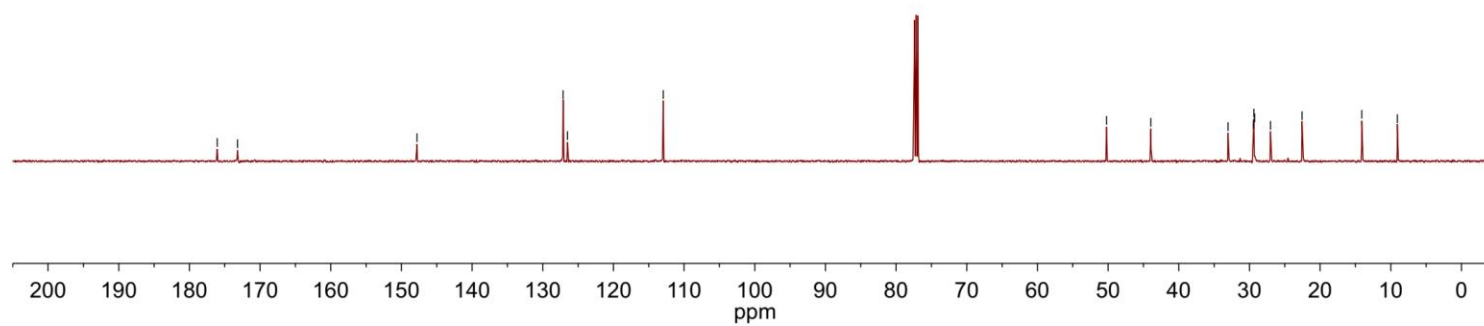

[Go back to table of contents](#)

### 3-Ethyl-3-(4-(methylamino)phenyl)piperidine-2,6-dione (71)

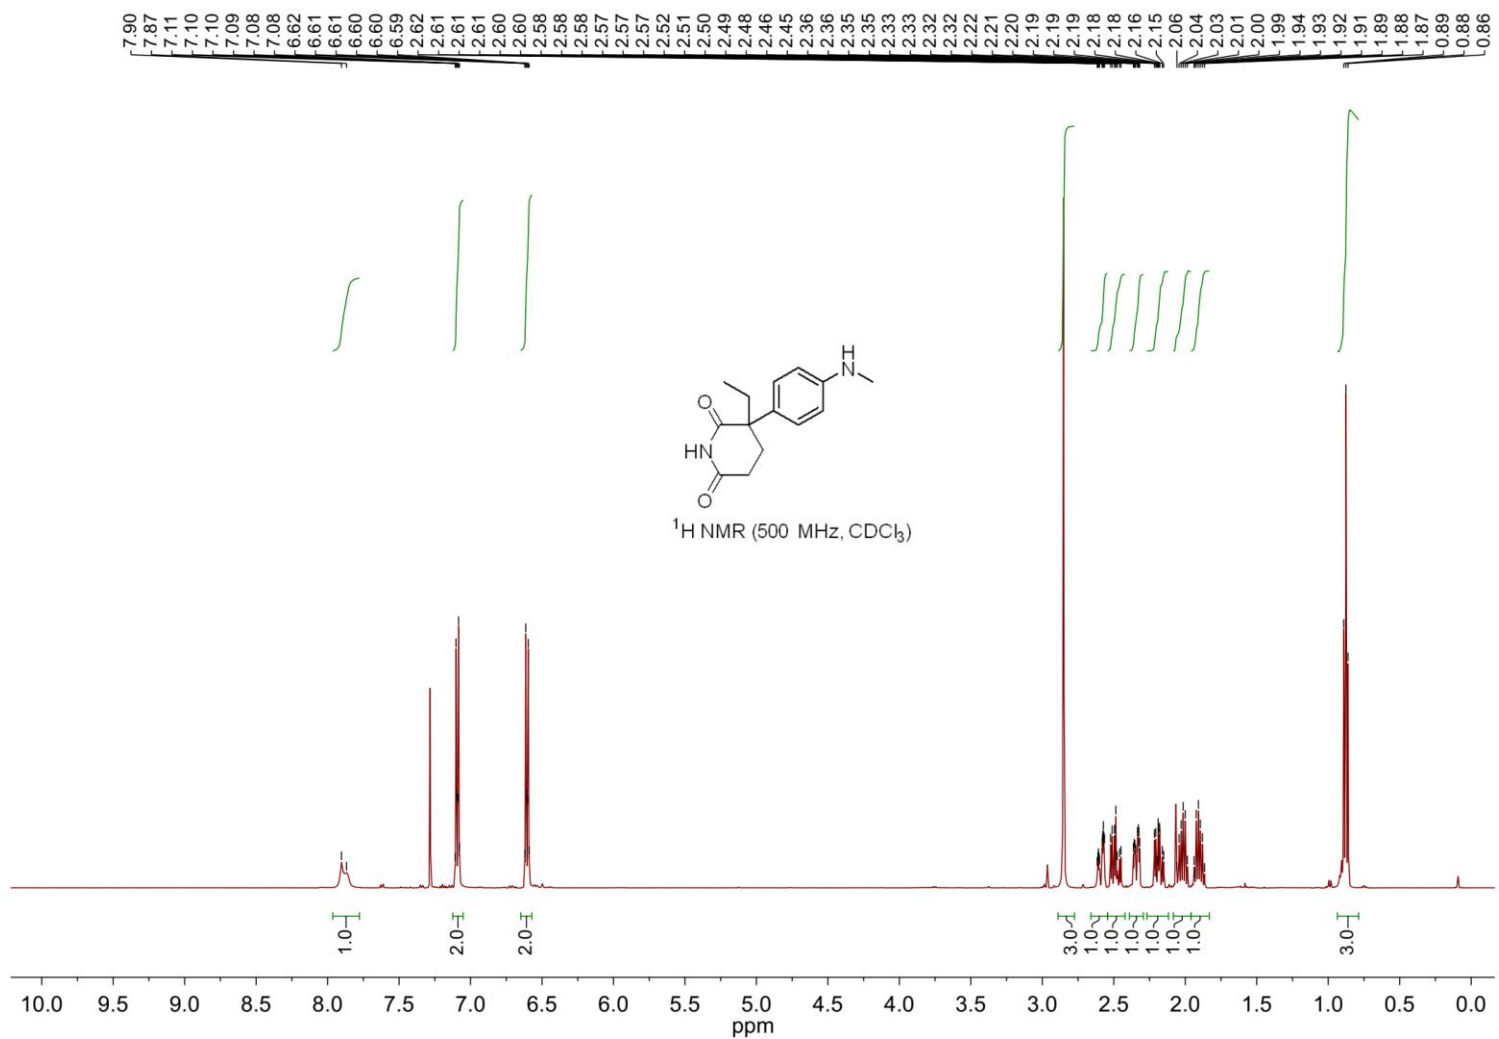

### 3-Ethyl-3-(4-(methylamino)phenyl)piperidine-2,6-dione (71)

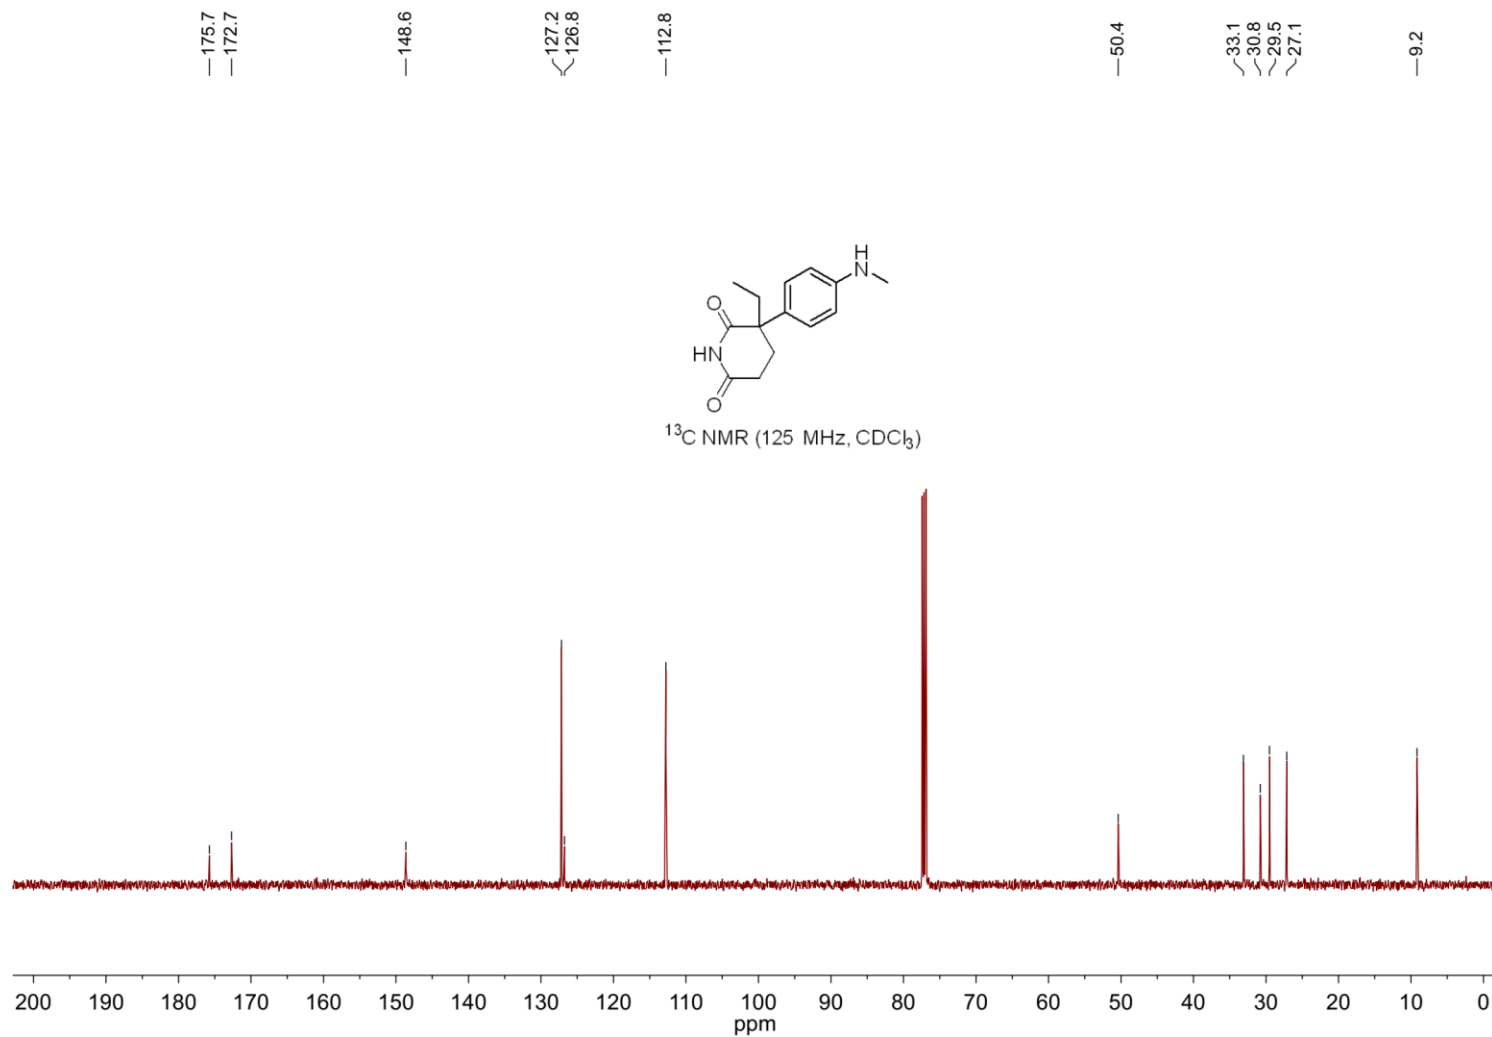

[Go back to table of contents](#)

### 3-(4-(Cyclobutylamino)phenyl)-3-ethylpiperidine-2,6-dione (72)

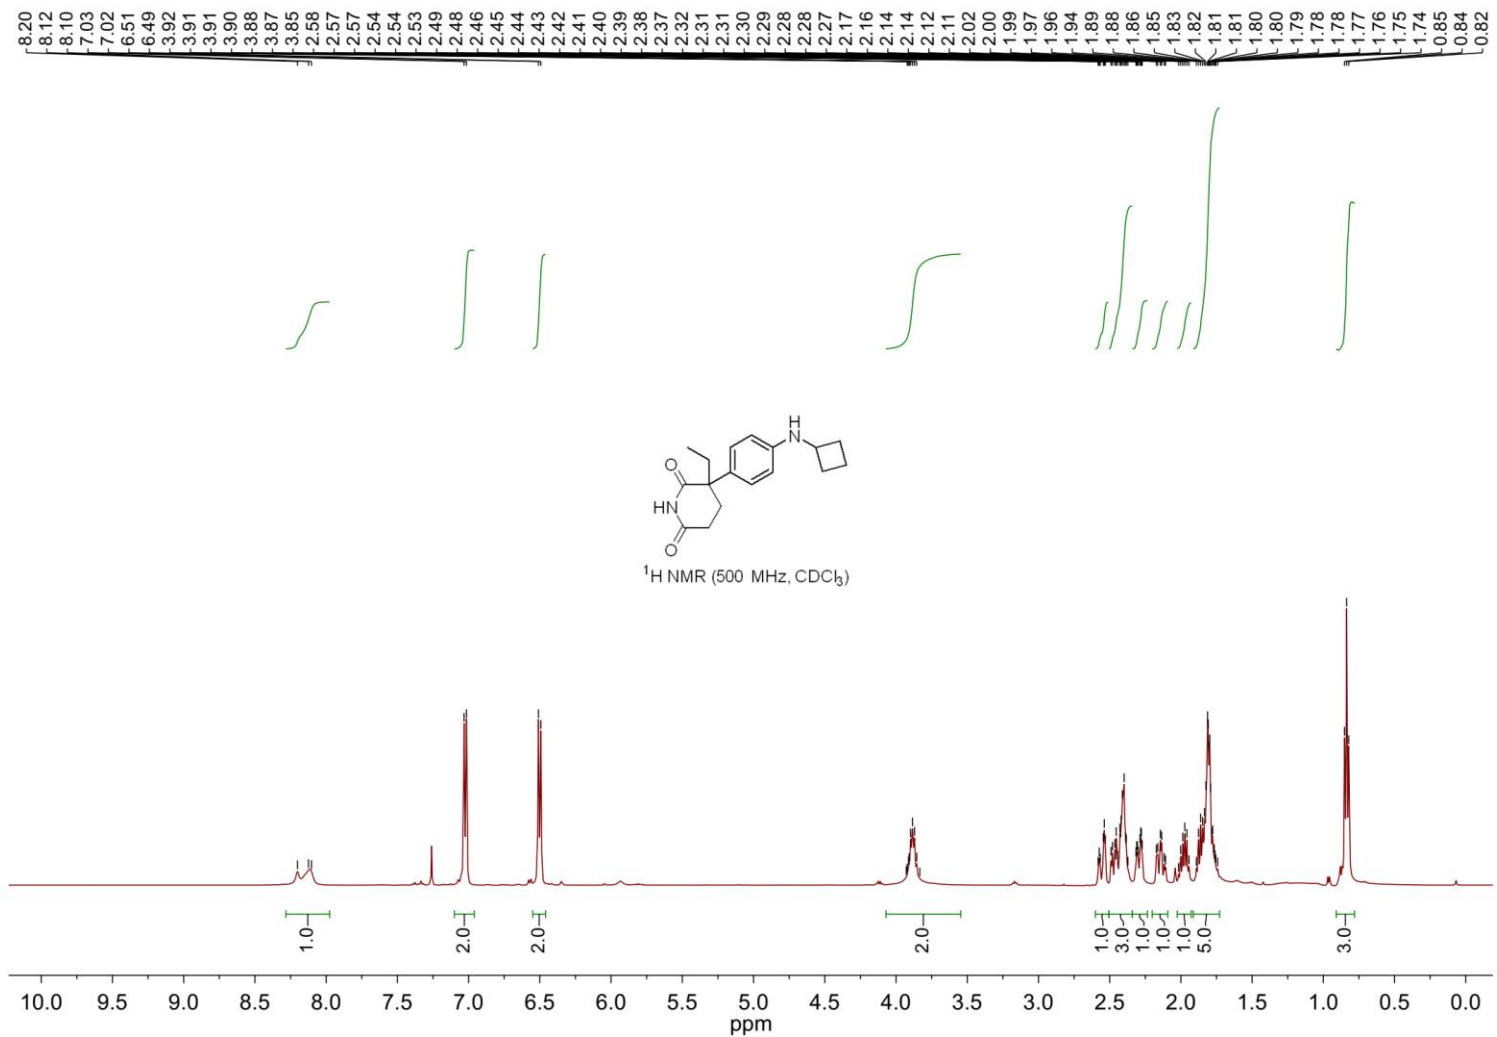

### 3-(4-(Cyclobutylamino)phenyl)-3-ethylpiperidine-2,6-dione (72)

—175.9  
—173.1

—146.6

—127.2  
—126.7

—113.3

—50.3  
—49.0

—33.1  
—31.3  
—29.5  
—27.1

—15.4

—9.1

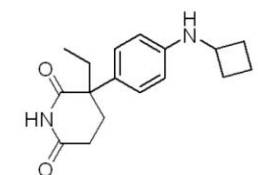

<sup>13</sup>C NMR (125 MHz, CDCl<sub>3</sub>)

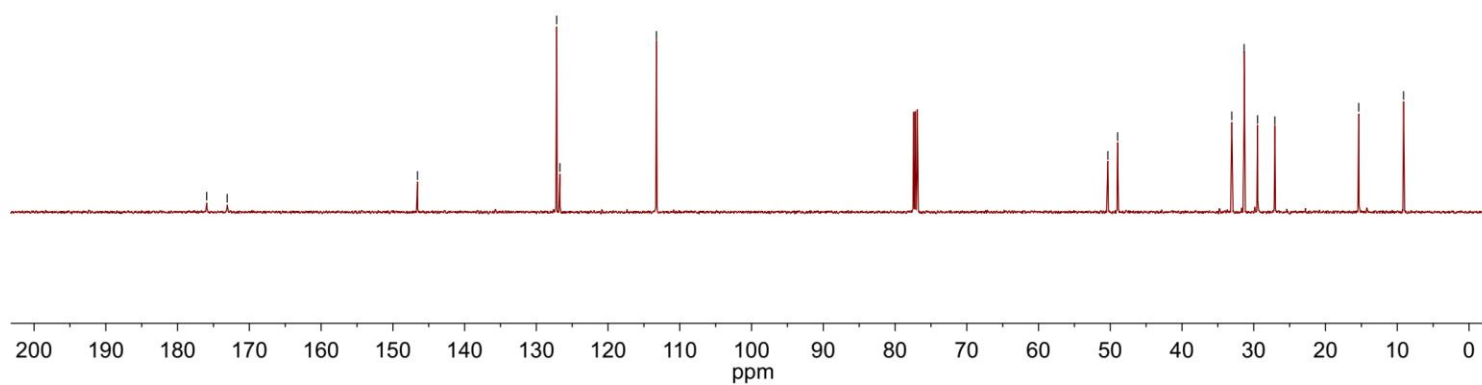

[Go back to table of contents](#)



**(7*S*\*,8*R*\*)-15-((4-methoxyphenyl)(methyl)amino)pentadecane-1,7,8-triyl triacetate (73)**

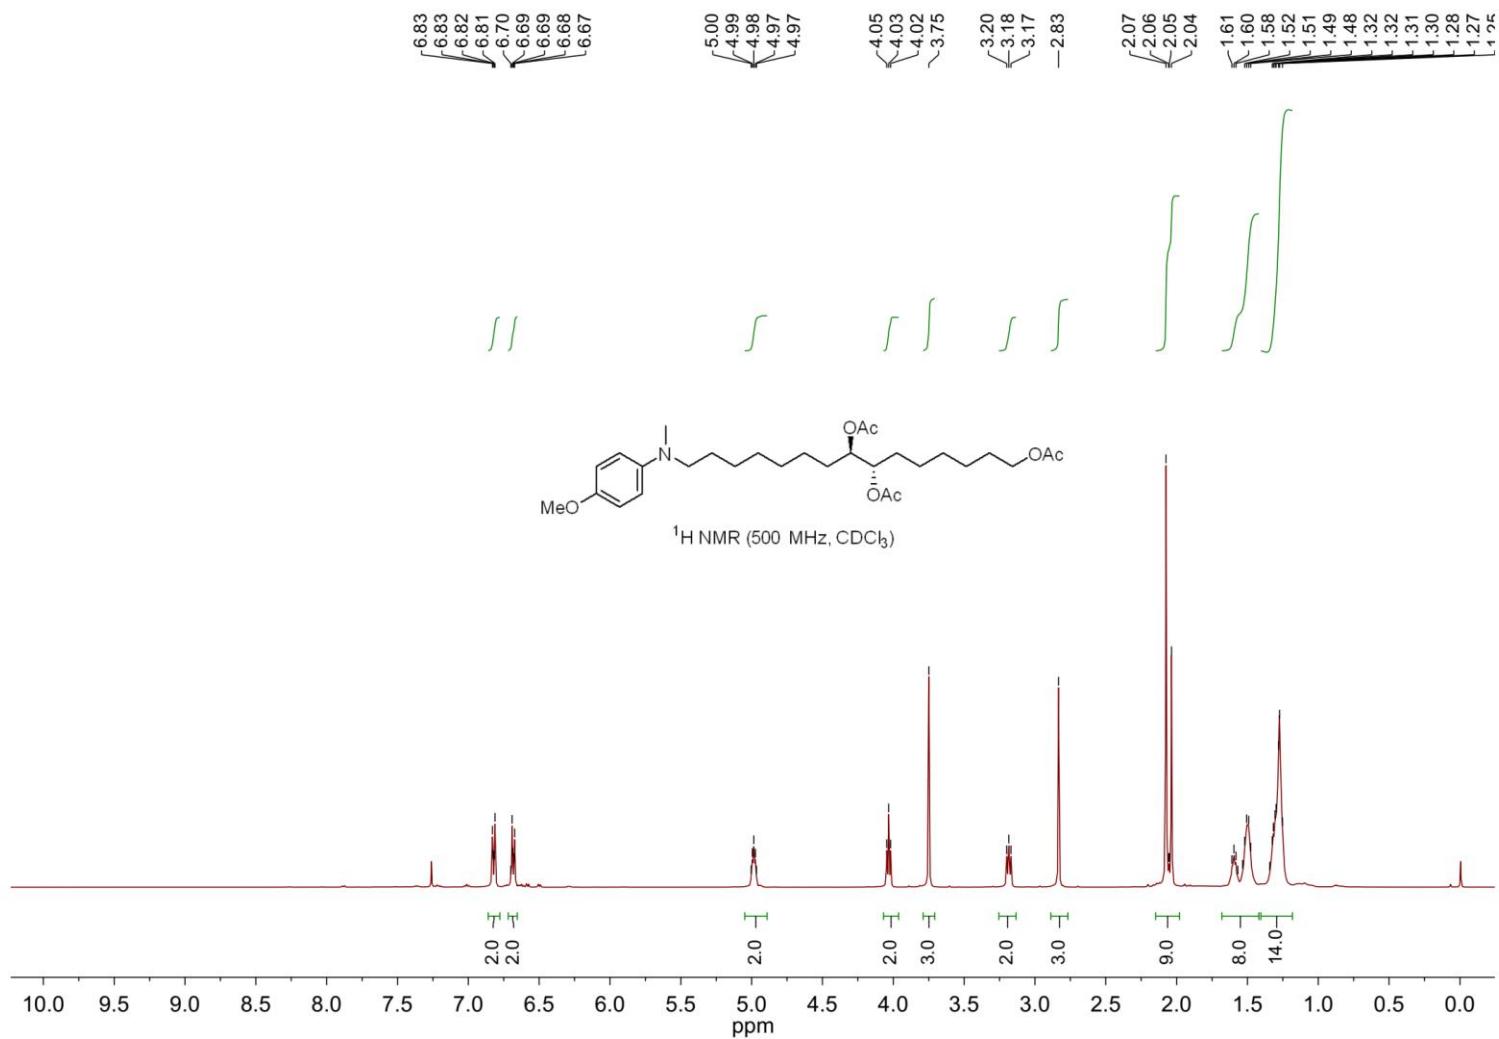

**(7*S*\*,8*R*\*)-15-((4-methoxyphenyl)(methyl)amino)pentadecane-1,7,8-triyl triacetate (73)**

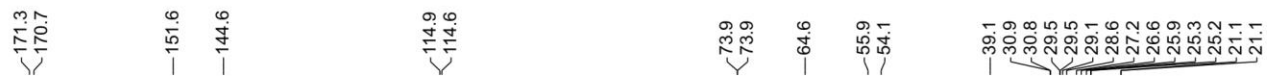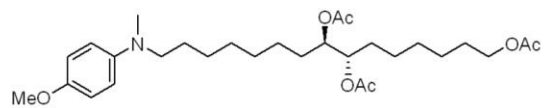

<sup>13</sup>C NMR (125 MHz, CDCl<sub>3</sub>)

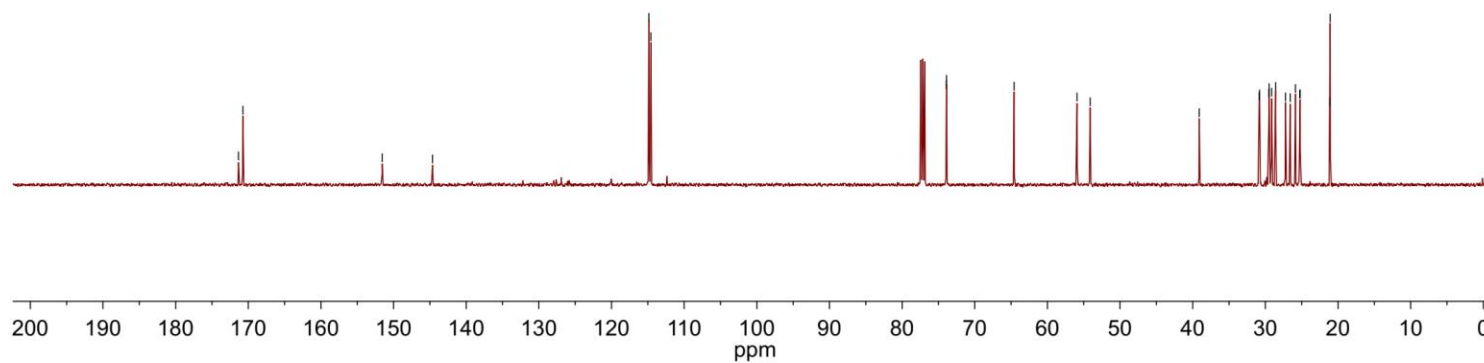

[Go back to table of contents](#)

**(Z)-N-(Heptadec-8-en-1-yl)-4-methyl-N-(p-tolyl)aniline (74)**

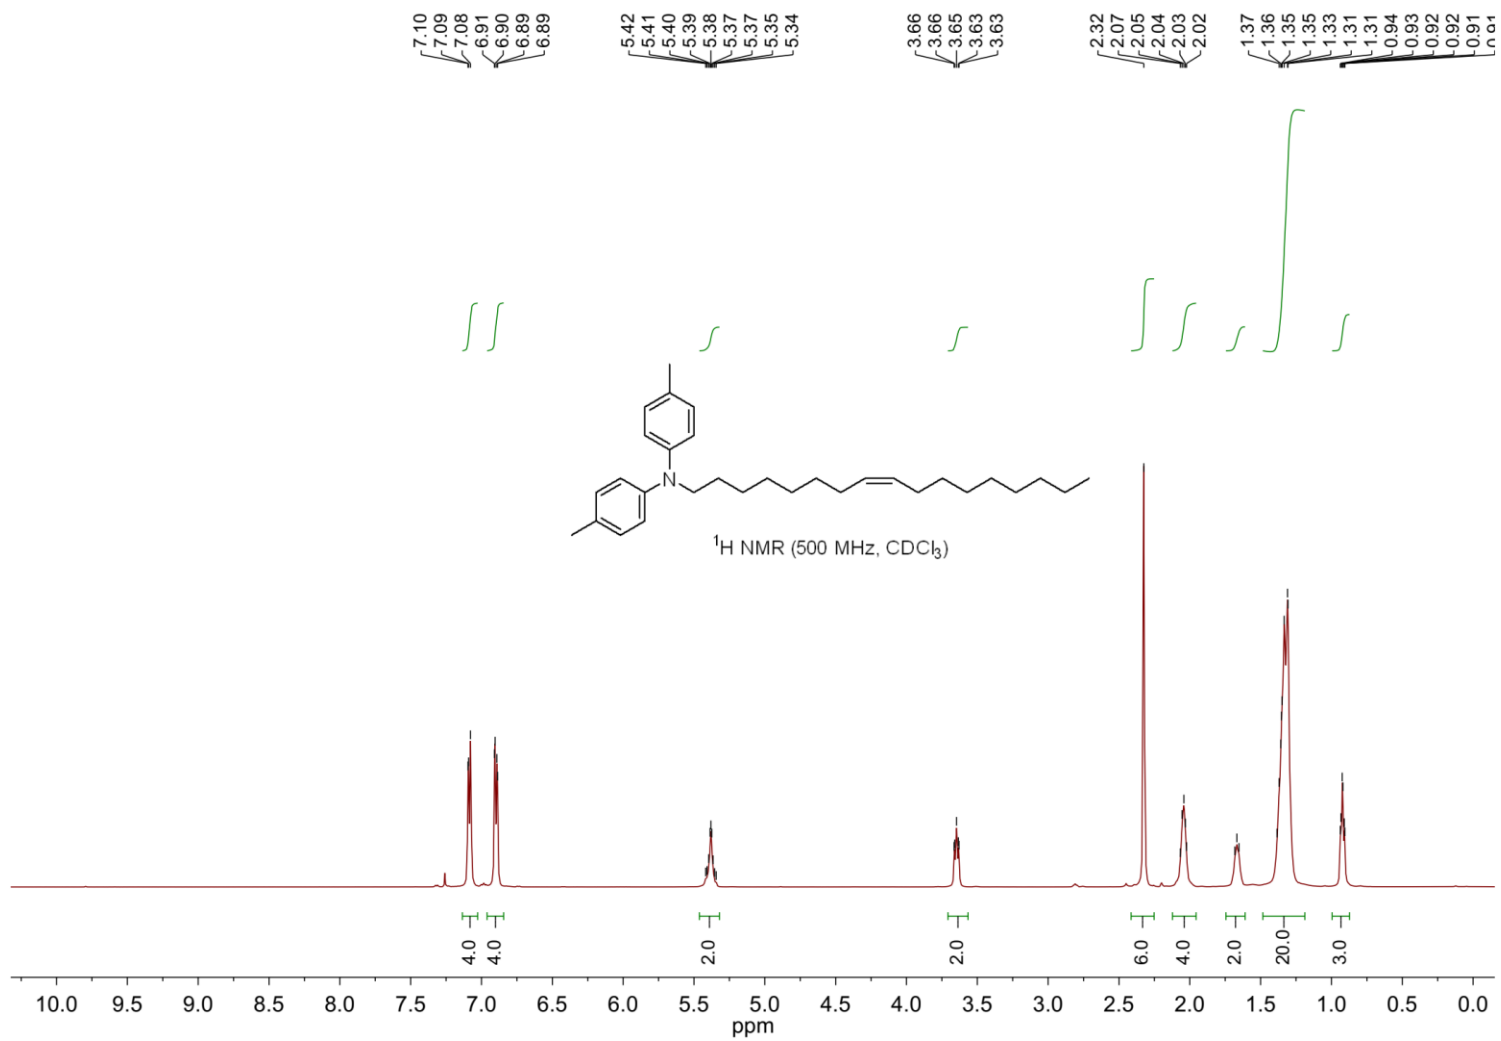

**(Z)-N-(Heptadec-8-en-1-yl)-4-methyl-N-(p-tolyl)aniline (74)**

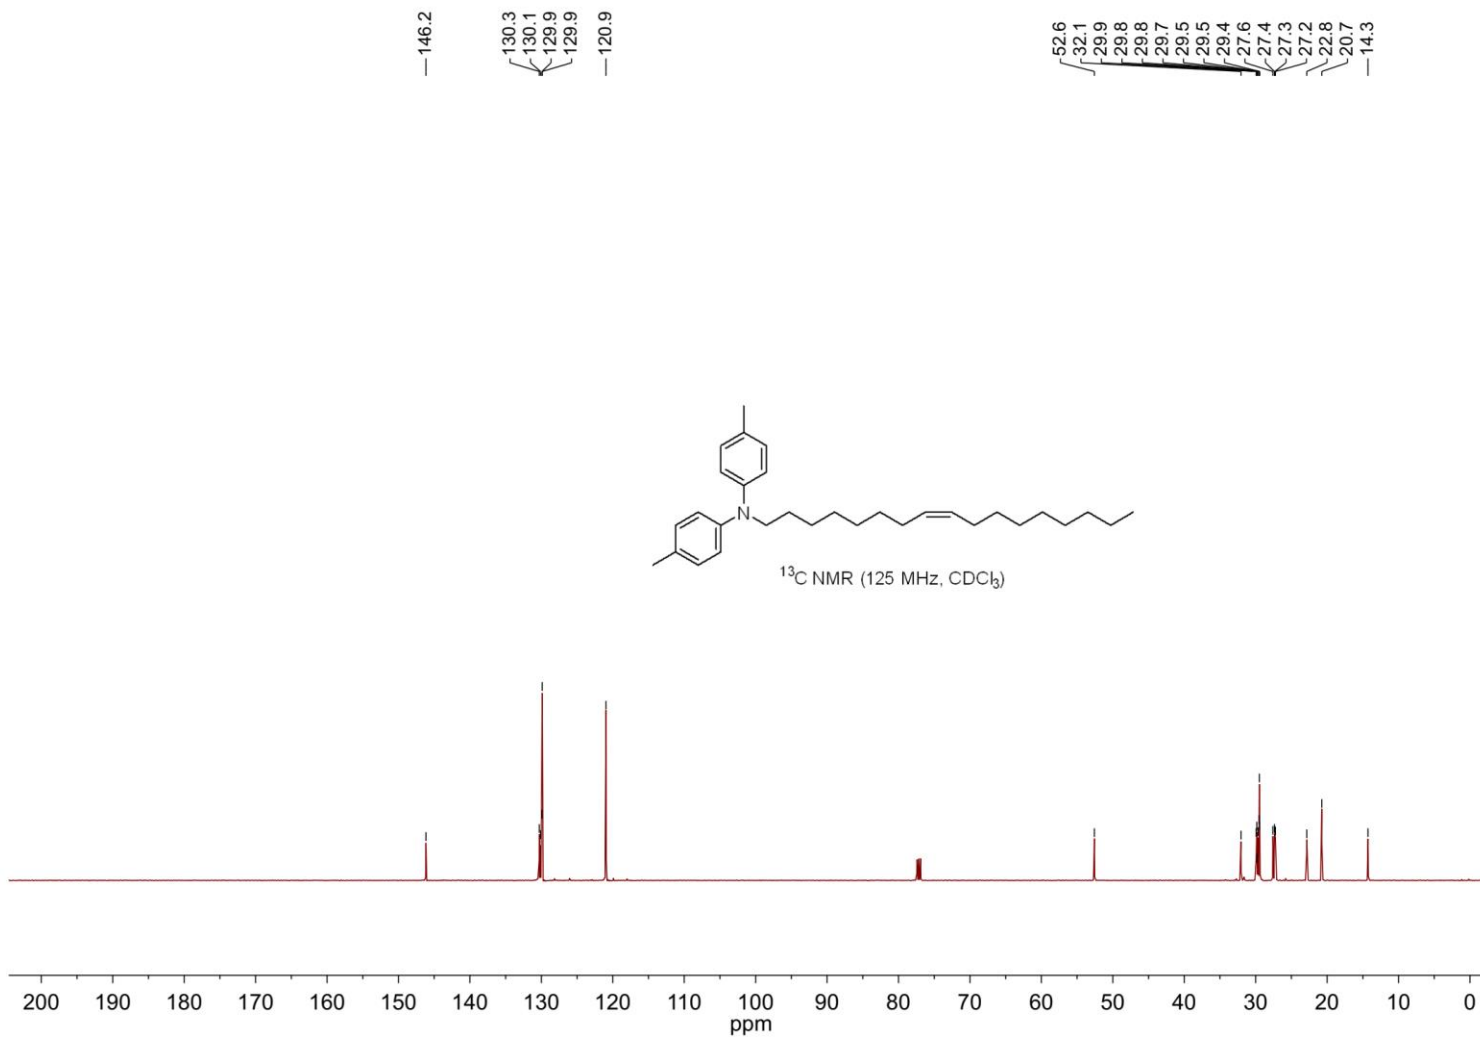

**(7*S*\*,8*R*\*)-15-(Bis(4-methoxyphenyl)amino)pentadecane-1,7,8-triol (75)**

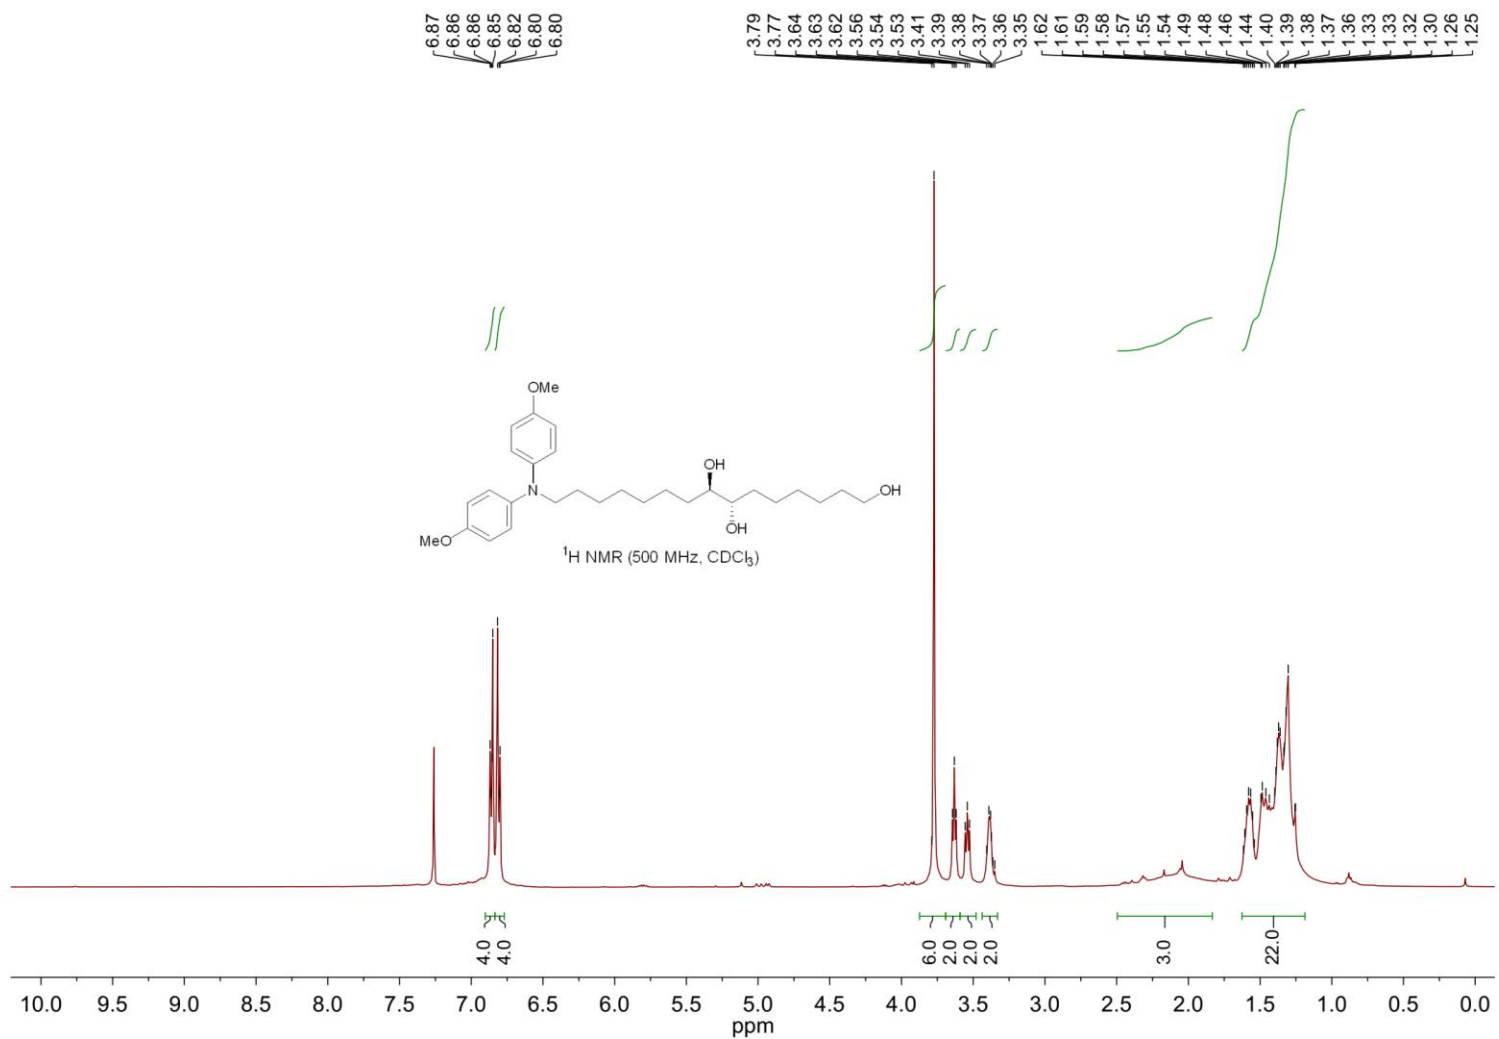

**(7*S*\*,8*R*\*)-15-(Bis(4-methoxyphenyl)amino)pentadecane-1,7,8-triol (75)**

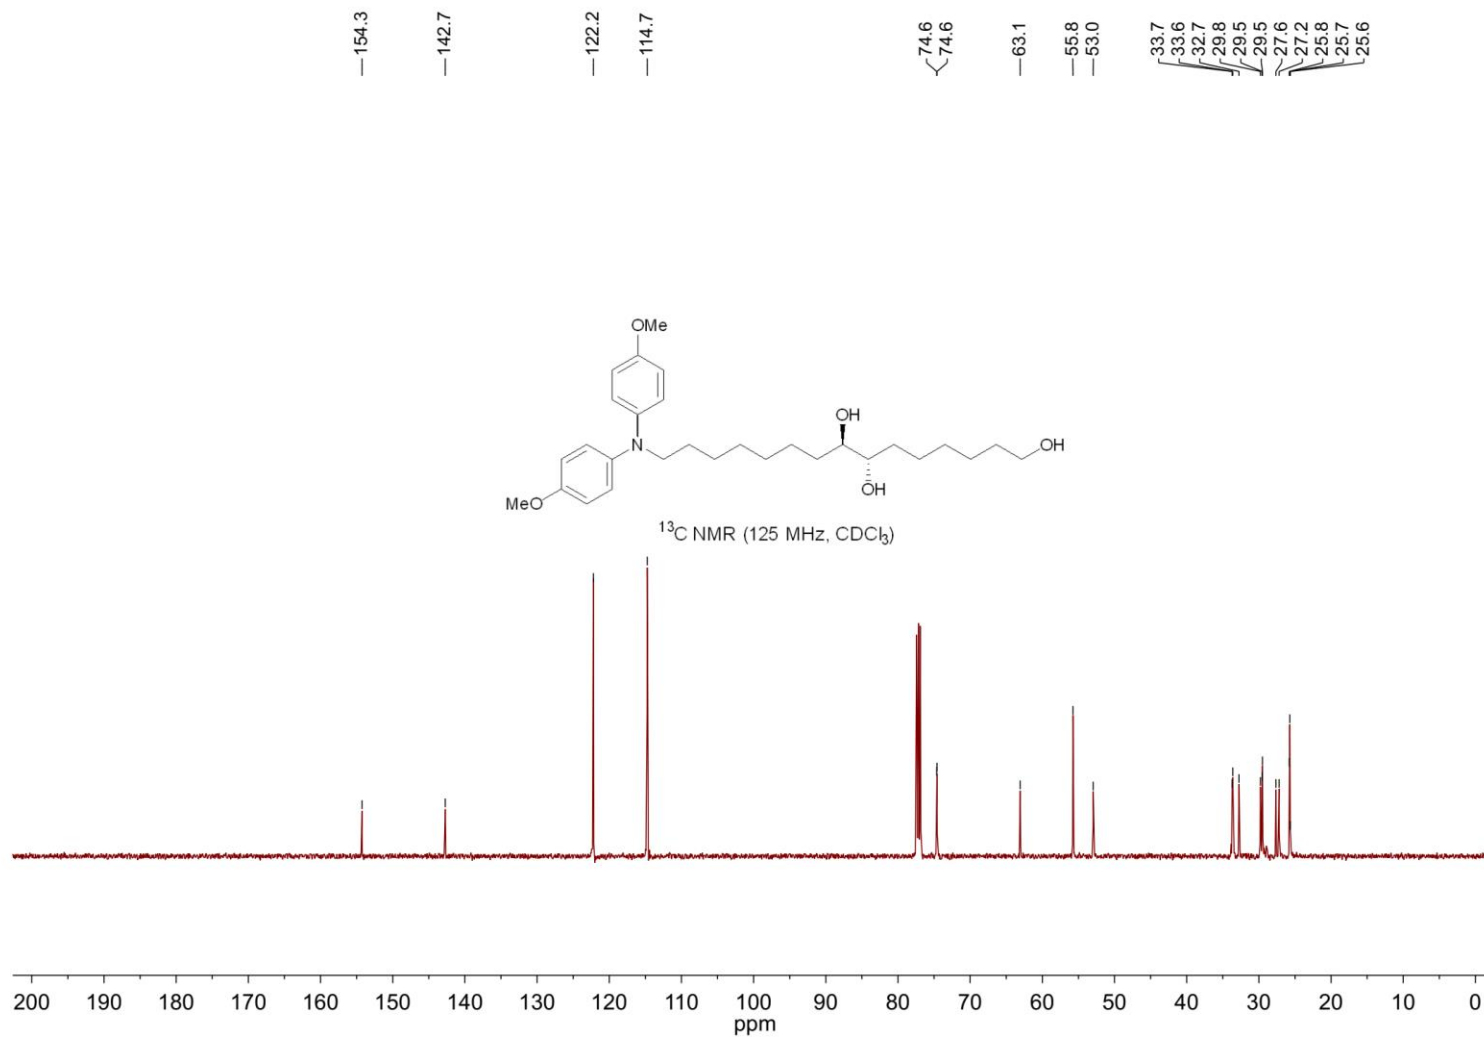

**(3*R*,5*S*,7*R*,8*R*,9*S*,10*S*,13*R*,14*S*,17*R*)-10,13-Dimethyl-17-((*R*)-4-((4-(4,4,5,5-tetramethyl-1,3,2-dioxaborolan-2-yl)phenyl)amino)butan-2-yl)hexadecahydro-1*H*-cyclopenta[*a*]phenanthrene-3,7-diol (76)**

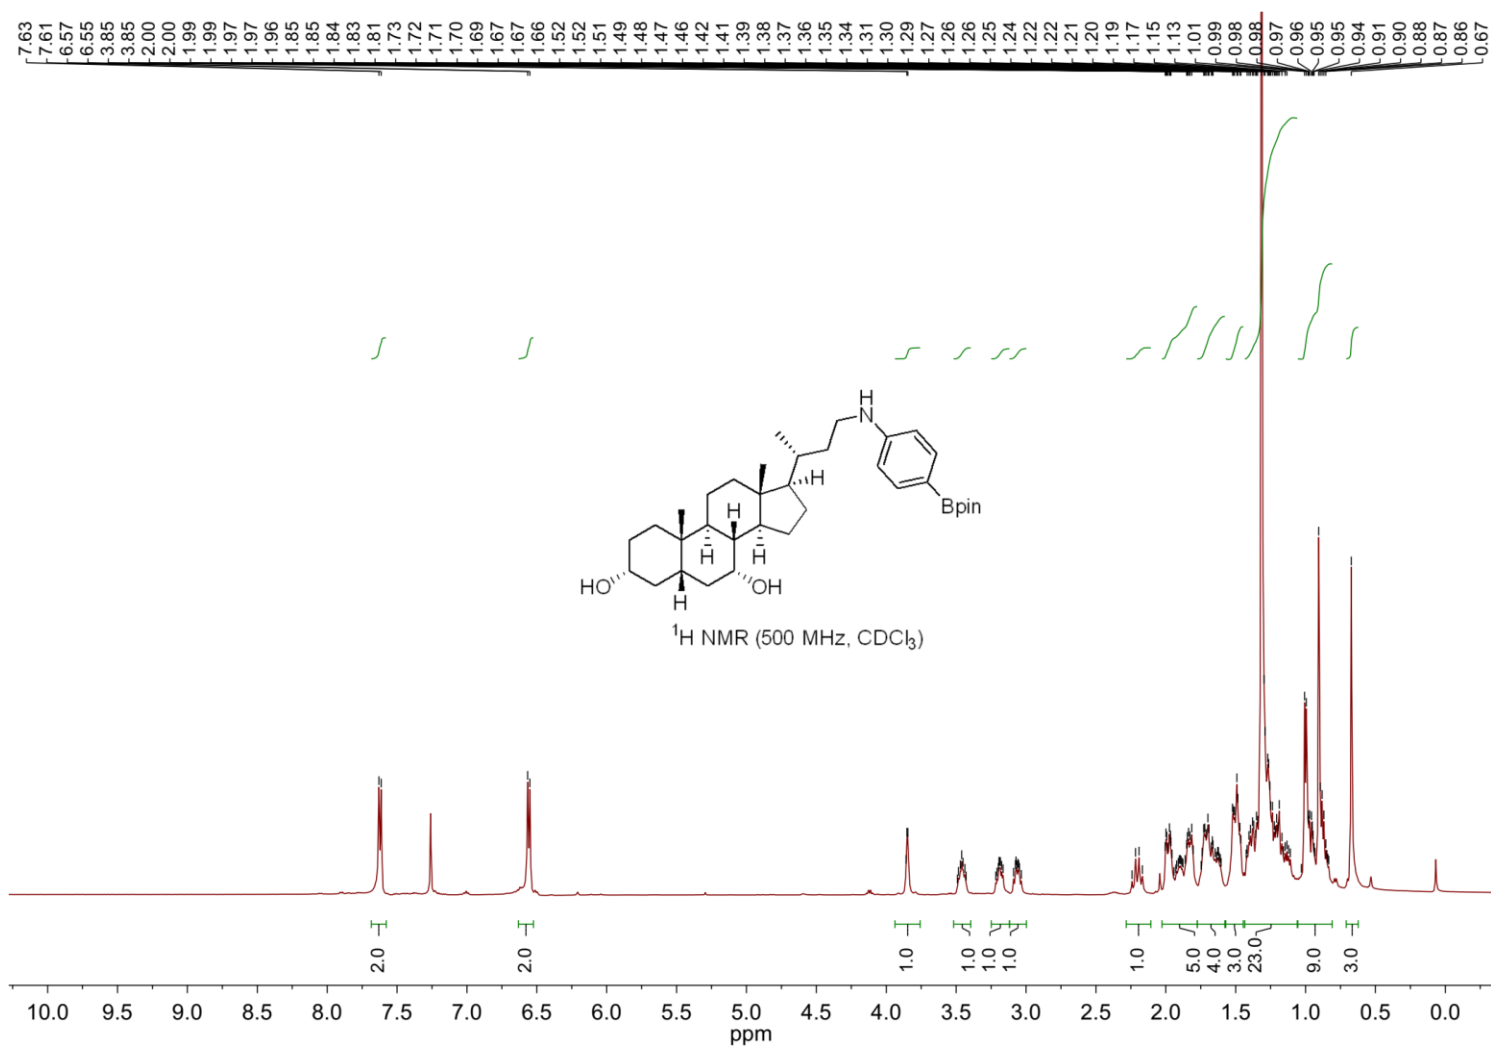

**(3*R*,5*S*,7*R*,8*R*,9*S*,10*S*,13*R*,14*S*,17*R*)-10,13-Dimethyl-17-((*R*)-4-((4-(4,4,5,5-tetramethyl-1,3,2-dioxaborolan-2-yl)phenyl)amino)butan-2-yl)hexadecahydro-1*H*-cyclopenta[*a*]phenanthrene-3,7-diol (76)**

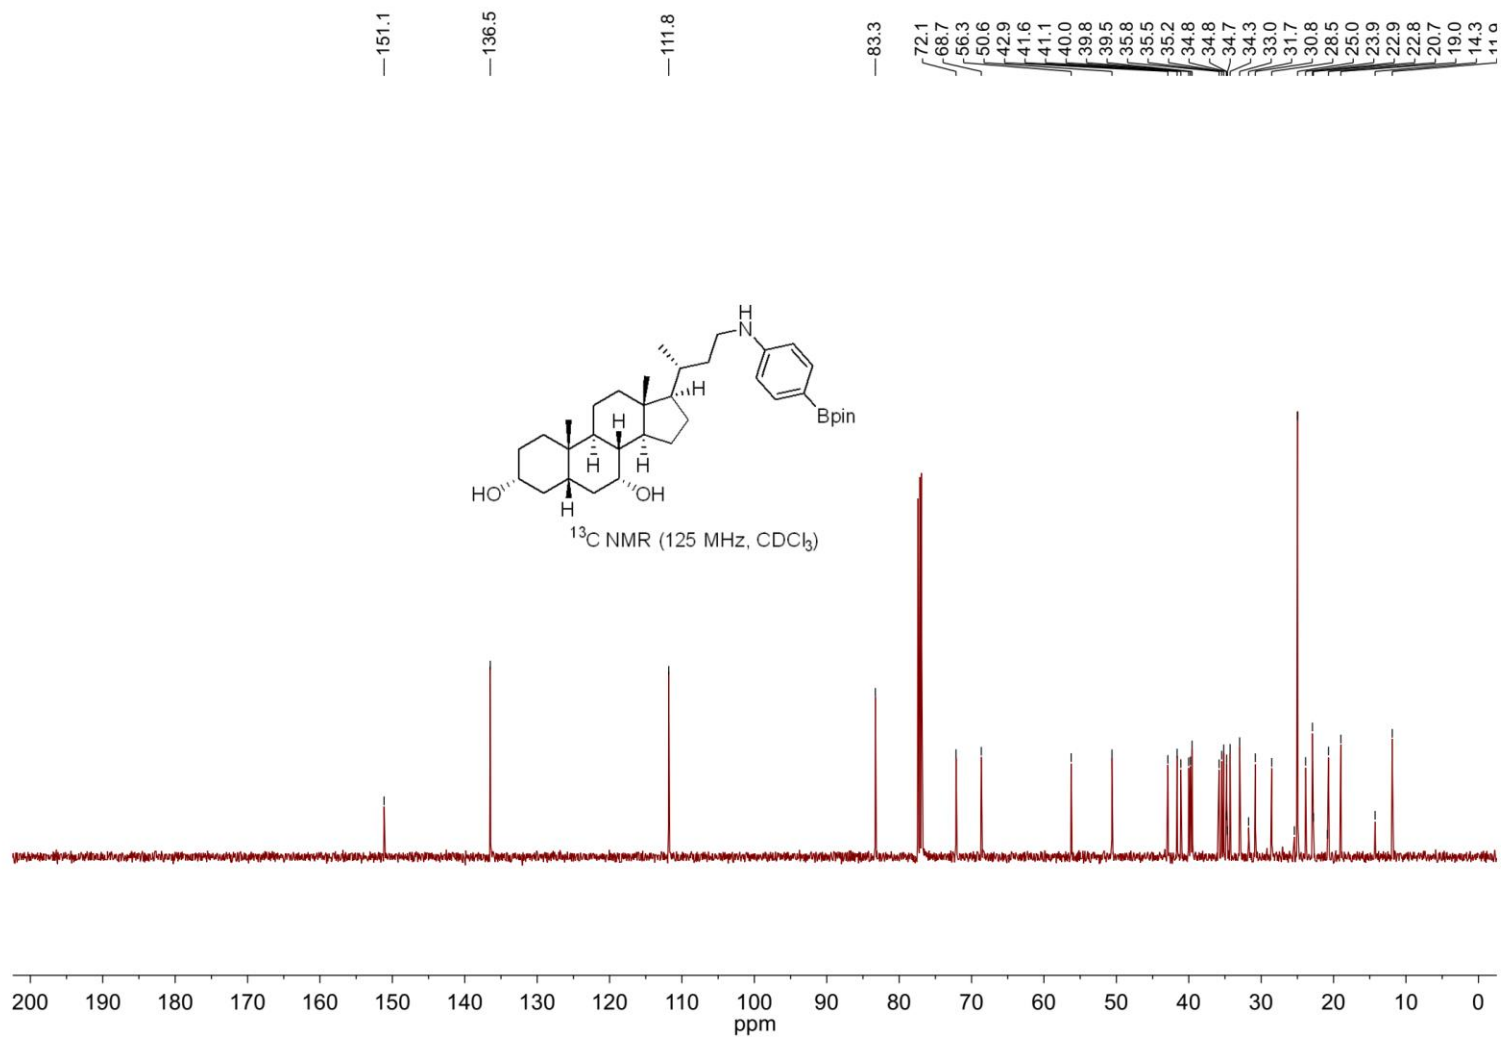

[Go back to table of contents](#)



**(3*R*,5*R*,8*R*,9*S*,10*S*,12*S*,13*R*,14*S*,17*R*)-17-((*R*)-4-((4-Methoxyphenyl)amino)butan-2-yl)-10,13-dimethylhexadecahydro-1*H*-cyclopenta[*a*]phenanthrene-3,12-diol (77)**

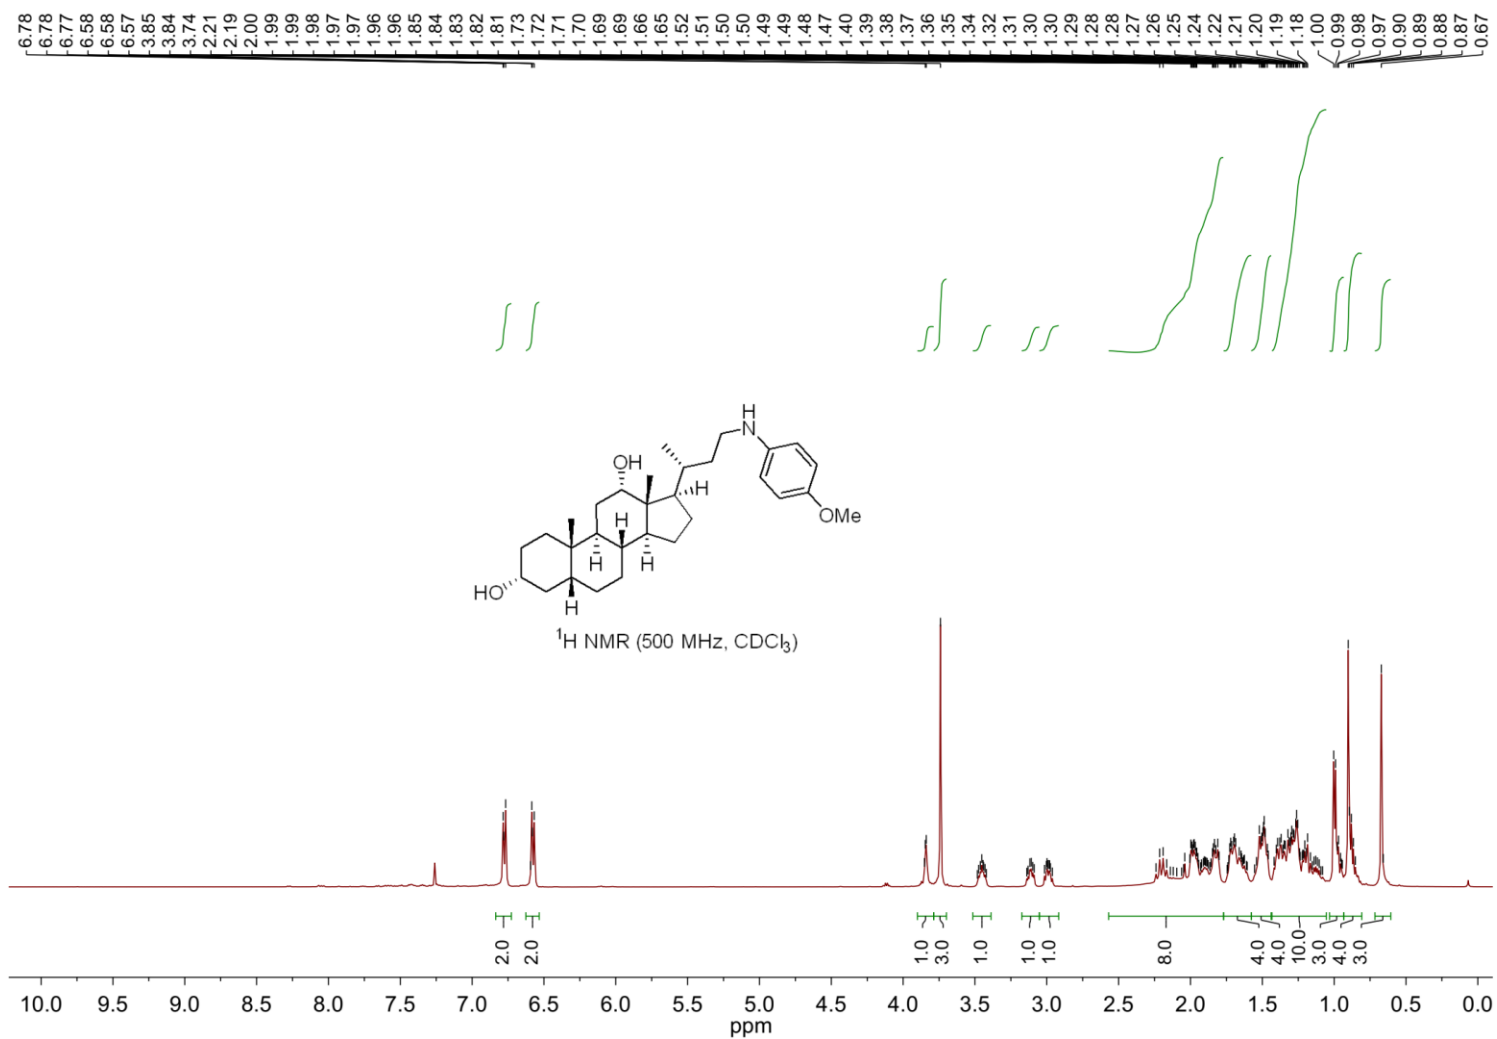

[Go back to table of contents](#)

**(3*R*,5*R*,8*R*,9*S*,10*S*,12*S*,13*R*,14*S*,17*R*)-17-((*R*)-4-((4-Methoxyphenyl)amino)butan-2-yl)-10,13-dimethylhexadecahydro-1*H*-cyclopenta[*a*]phenanthrene-3,12-diol (77)**

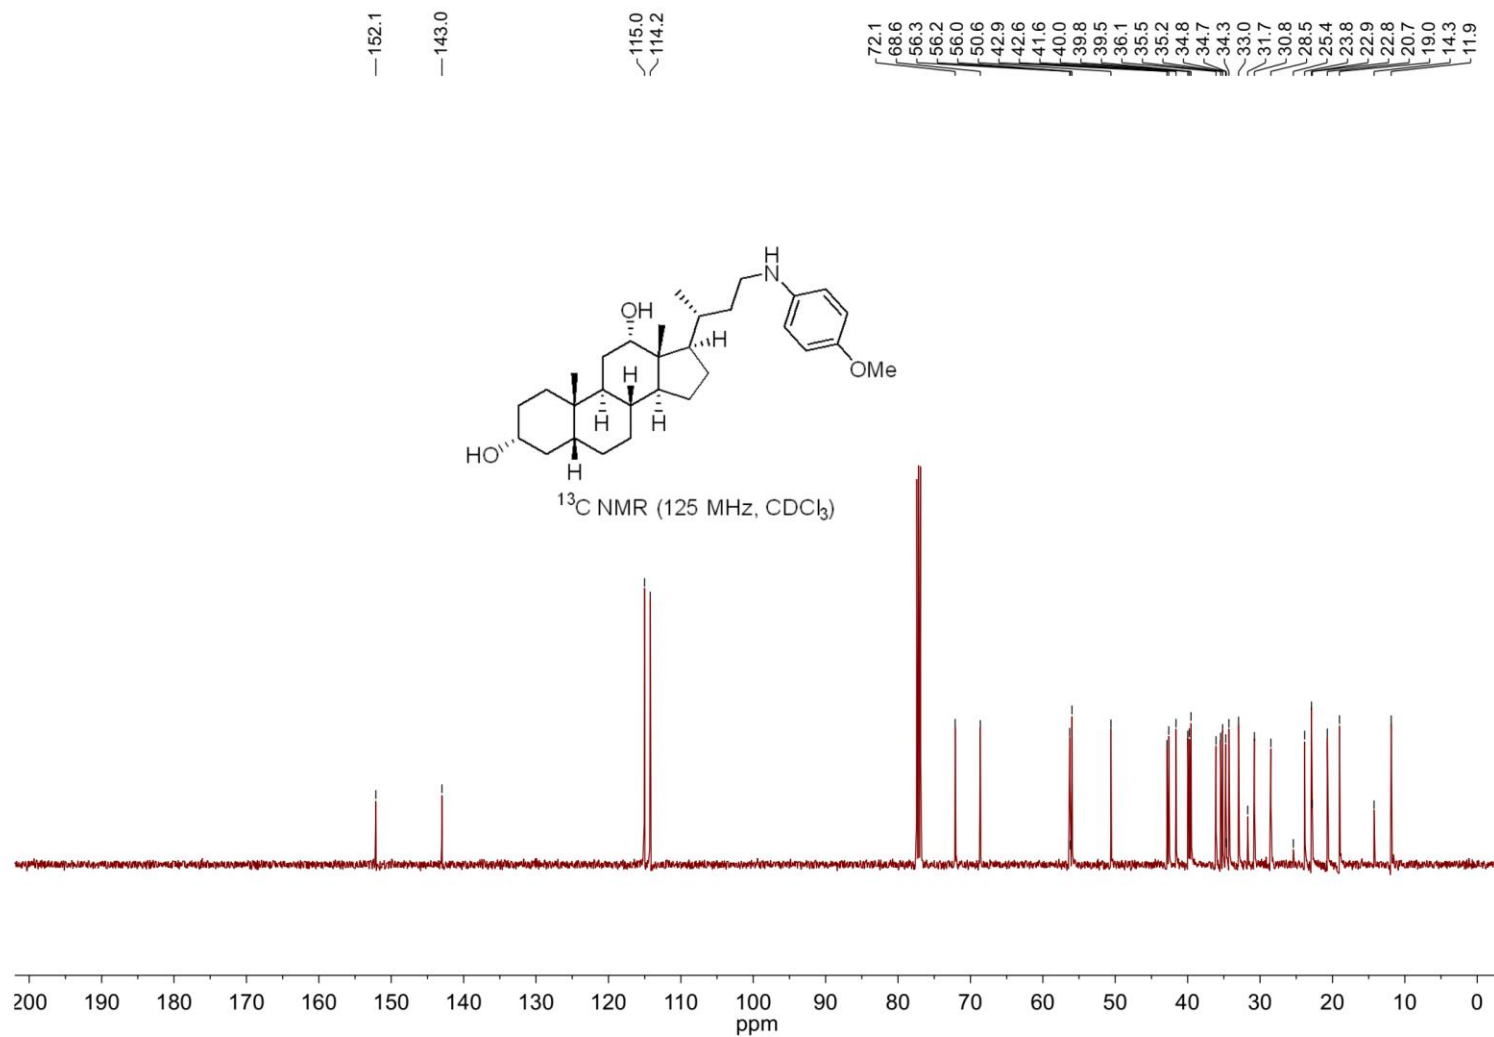

[Go back to table of contents](#)

**(3*R*,5*R*,8*R*,9*S*,10*S*,12*S*,13*R*,14*S*,17*R*)-10,13-Dimethyl-17-((*R*)-4-((3-(methylthio)phenyl)amino)butan-2-yl)hexadecahydro-1*H*-cyclopenta[*a*]phenanthrene-3,12-diol (78)**

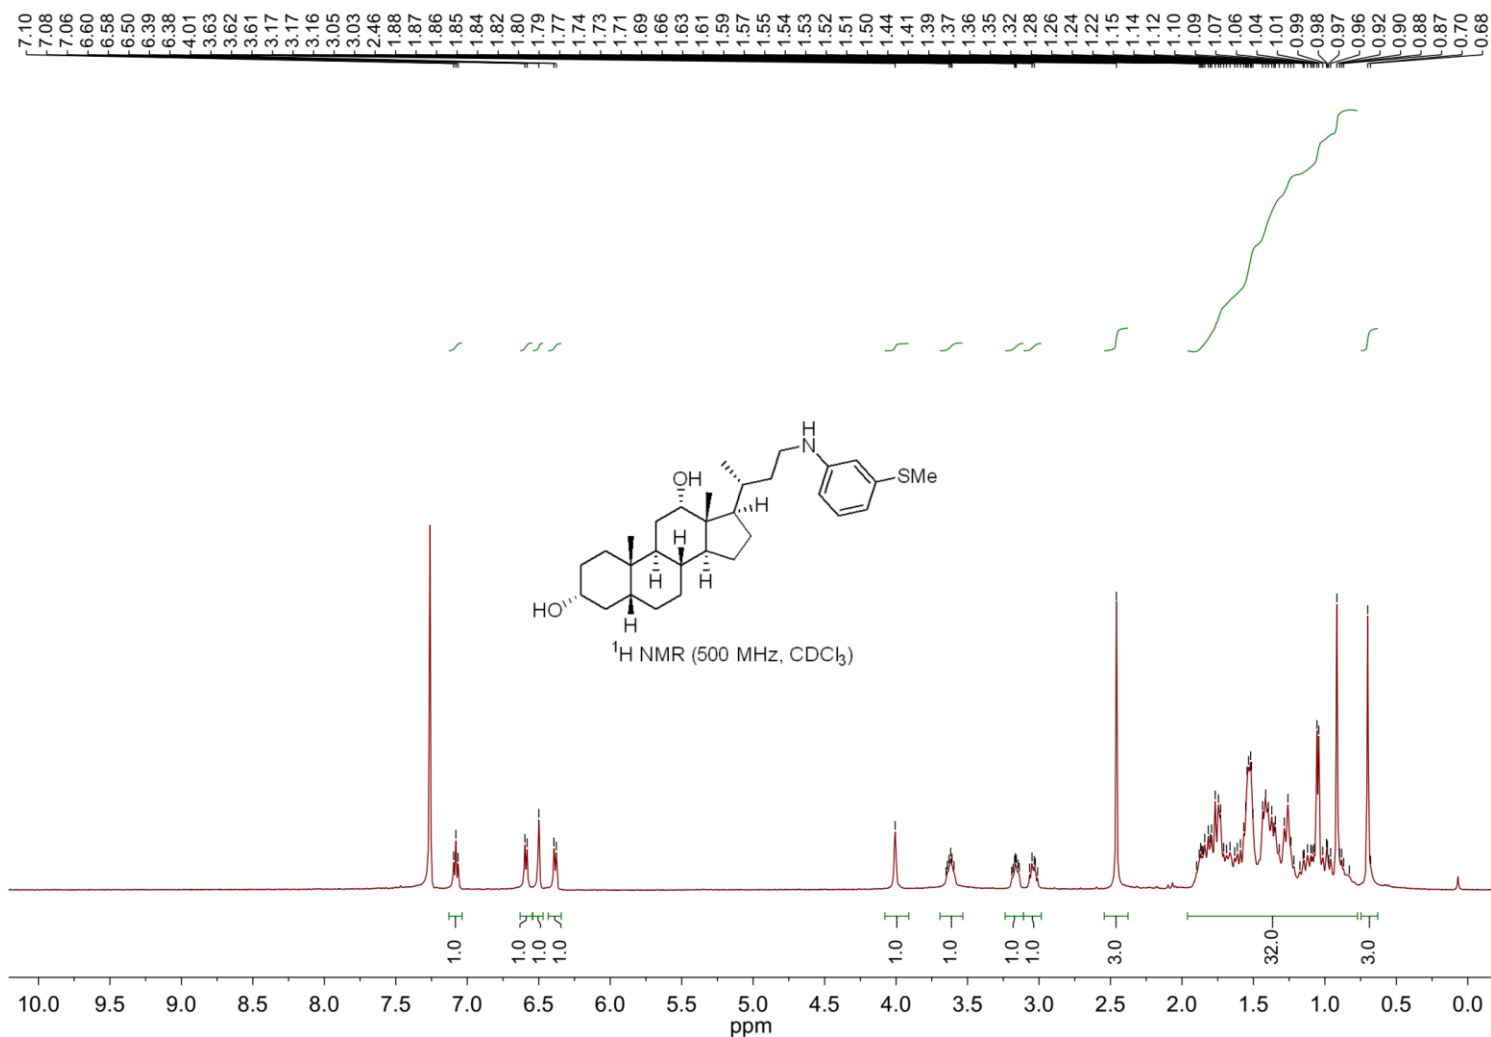

**(3R,5R,8R,9S,10S,12S,13R,14S,17R)-10,13-Dimethyl-17-((R)-4-((3-(methylthio)phenyl)amino)butan-2-yl)hexadecahydro-1H-cyclopenta[*a*]phenanthrene-3,12-diol (78)**

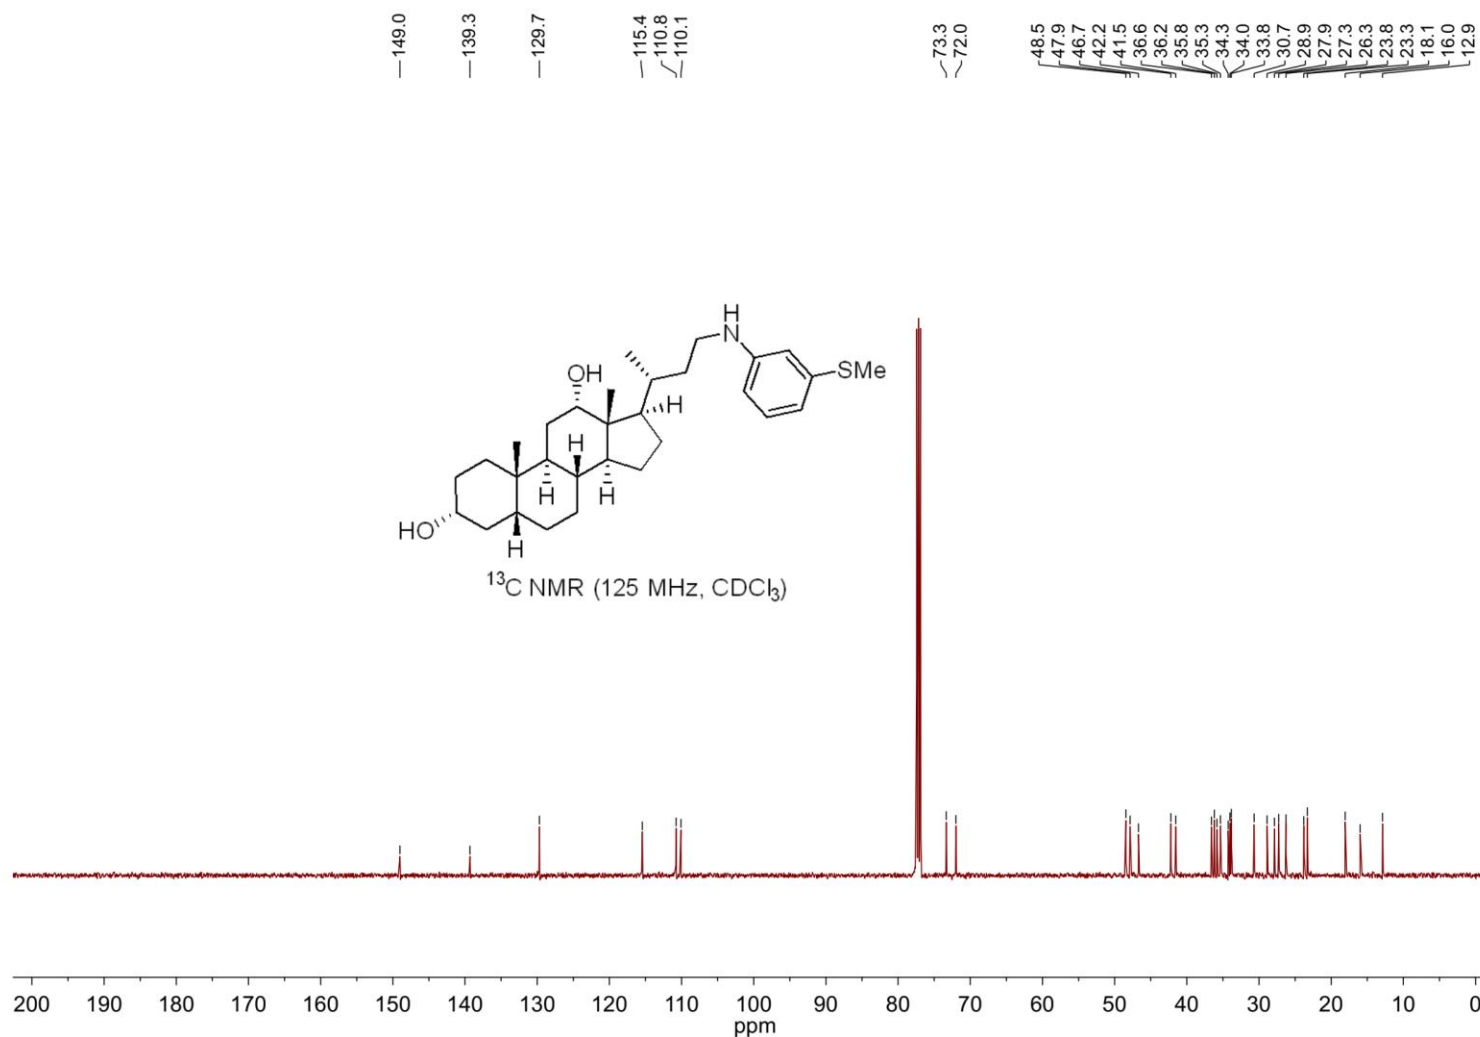

[Go back to table of contents](#)

**(3*R*,5*S*,7*R*,8*R*,9*S*,10*S*,12*S*,13*R*,14*S*,17*R*)-10,13-Dimethyl-17-((*R*)-4-((3-(methylthio)phenyl)amino)butan-2-yl)hexadecahydro-1*H*-cyclopenta[*a*]phenanthrene-3,7,12-triol (79)**

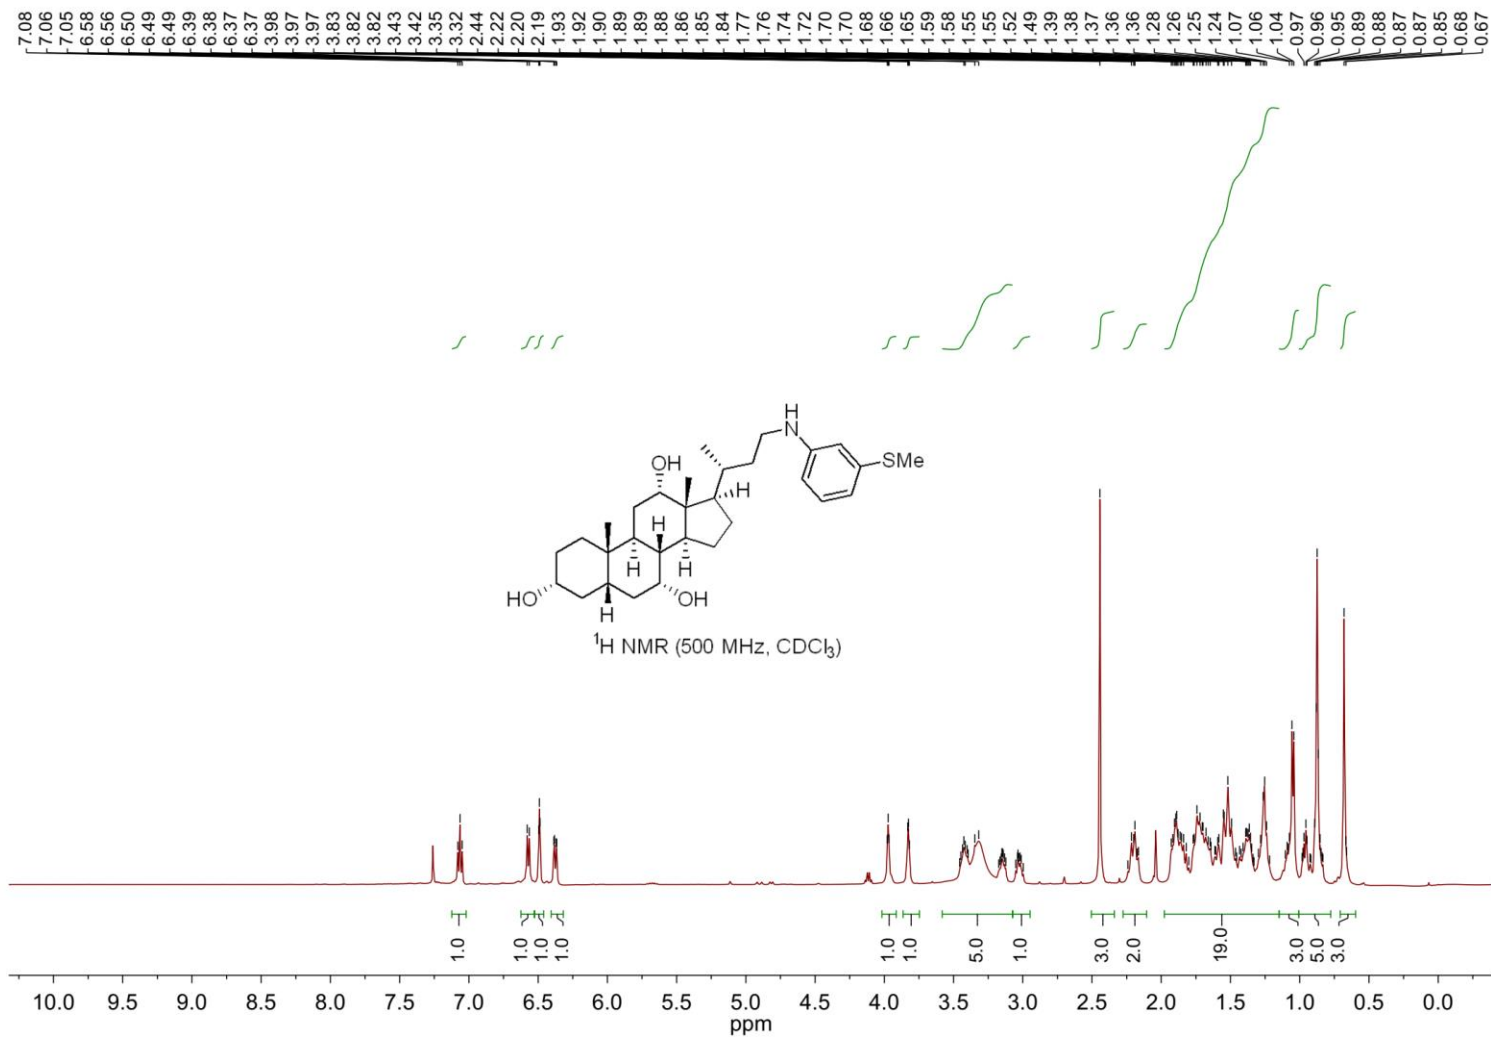



**(3*R*,5*R*,8*R*,9*S*,10*S*,12*S*,13*R*,14*S*,17*R*)-10,13-Dimethyl-17-((*R*)-4-((4-(trifluoromethyl)phenyl)amino)butan-2-yl)hexadecahydro-1*H*-cyclopenta[*a*]phenanthrene-3,12-diyl diacetate (80)**

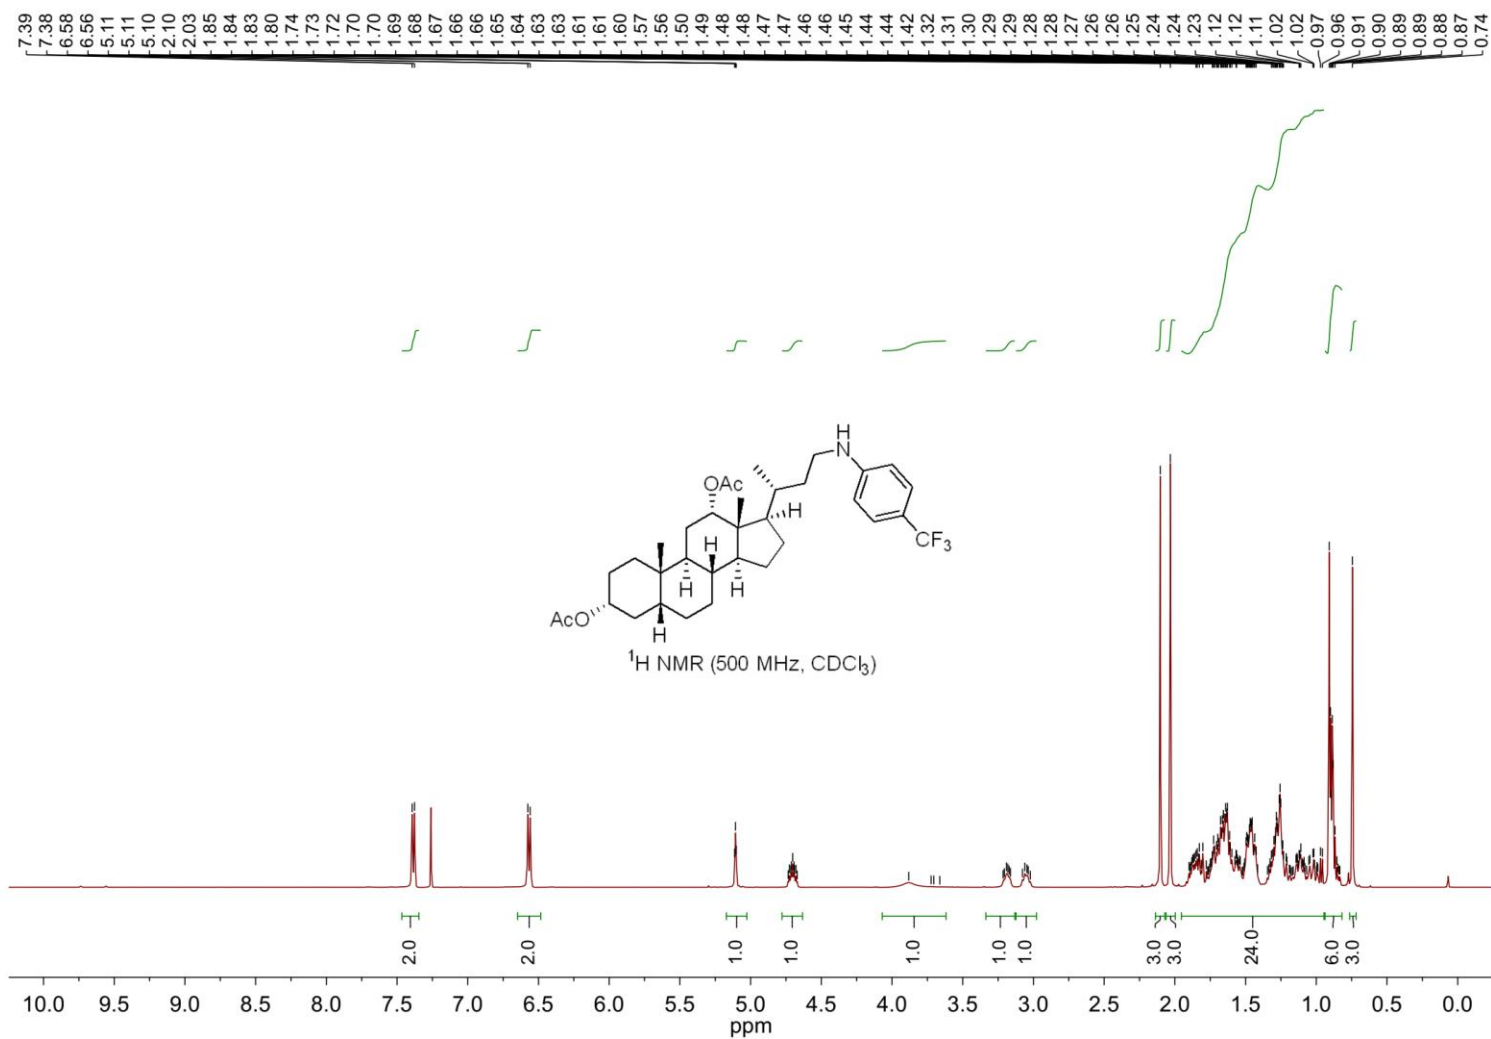

**(3*R*,5*R*,8*R*,9*S*,10*S*,12*S*,13*R*,14*S*,17*R*)-10,13-Dimethyl-17-((*R*)-4-((4-(trifluoromethyl)phenyl)amino)butan-2-yl)hexadecahydro-1*H*-cyclopenta[*a*]phenanthrene-3,12-diyl diacetate (80)**

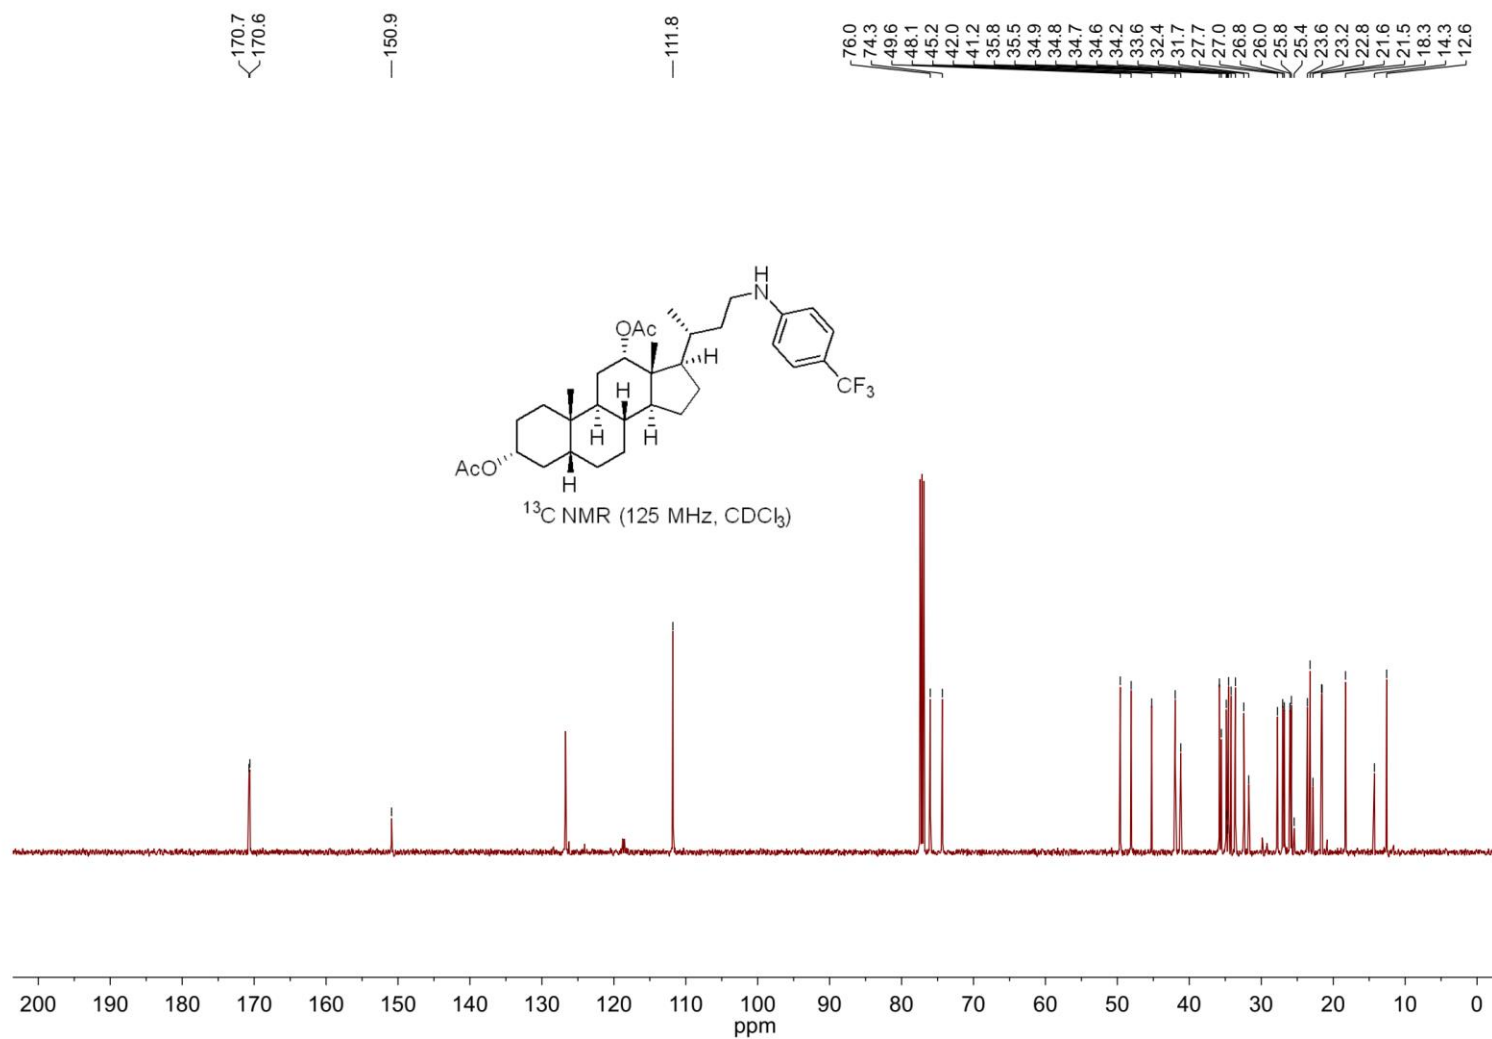



**(3R,5S,7R,8R,9S,10S,13R,14S,17R)-17-((R)-4-(Bis(4-methoxyphenyl)amino)butan-2-yl)-10,13-dimethylhexadecahydro-1H-cyclopenta[*a*]phenanthrene-3,7-diol (81)**

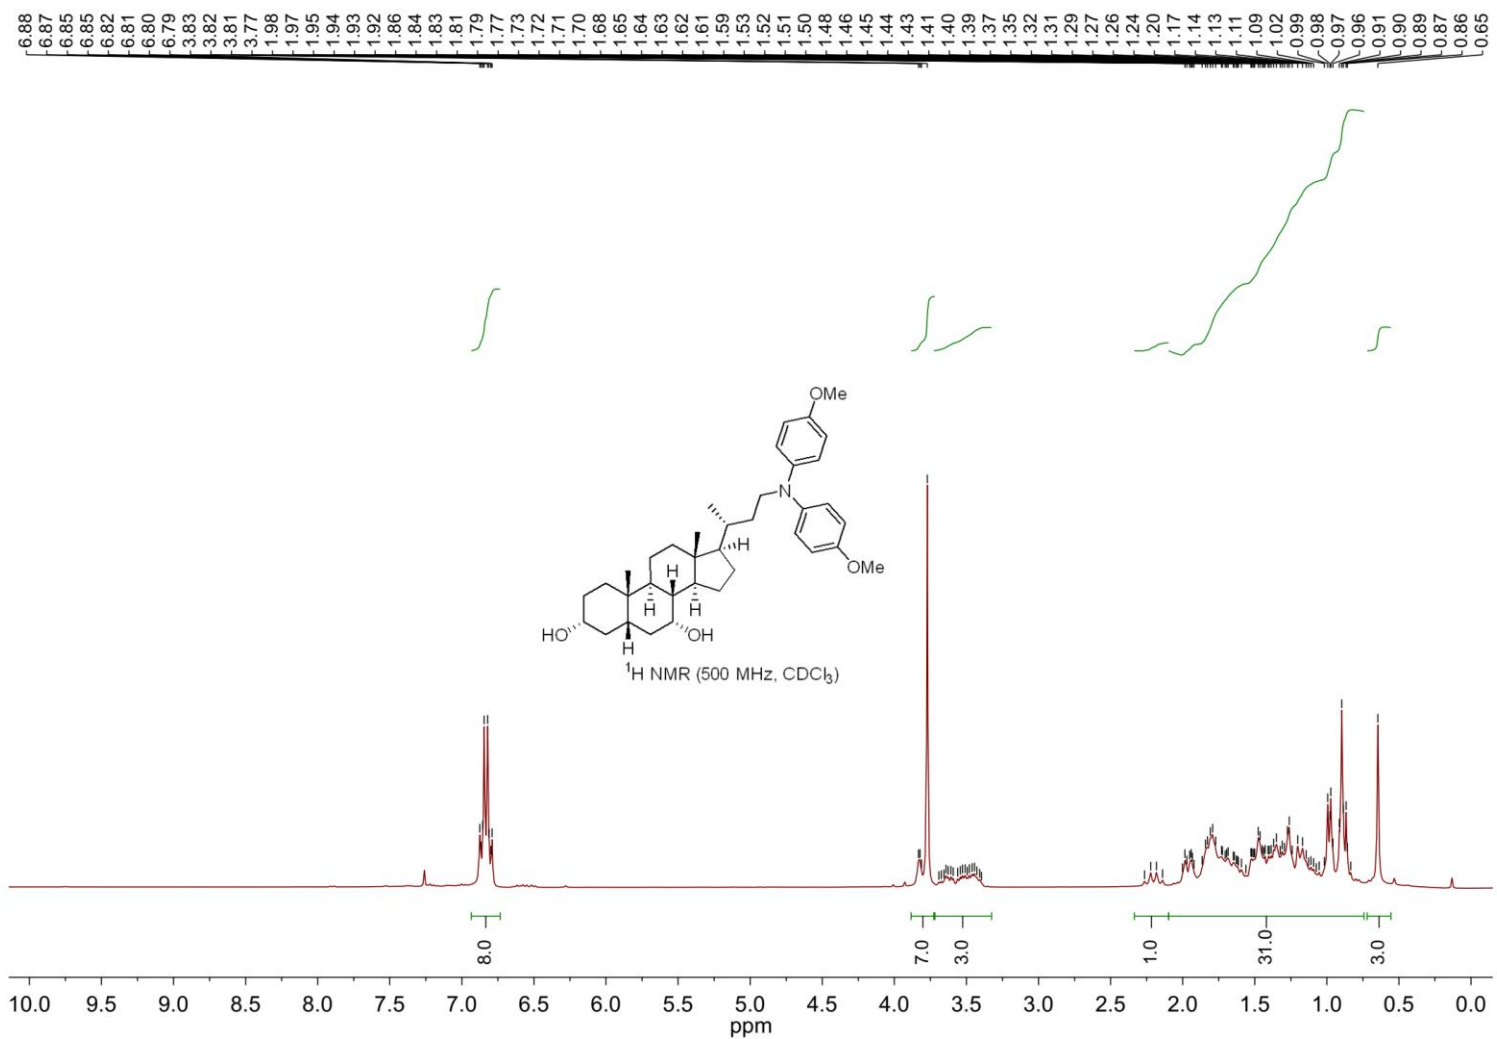

[Go back to table of contents](#)

**(3*R*,5*S*,7*R*,8*R*,9*S*,10*S*,13*R*,14*S*,17*R*)-17-((*R*)-4-(Bis(4-methoxyphenyl)amino)butan-2-yl)-10,13-dimethylhexadecahydro-1*H*-cyclopenta[*a*]phenanthrene-3,7-diol (81)**

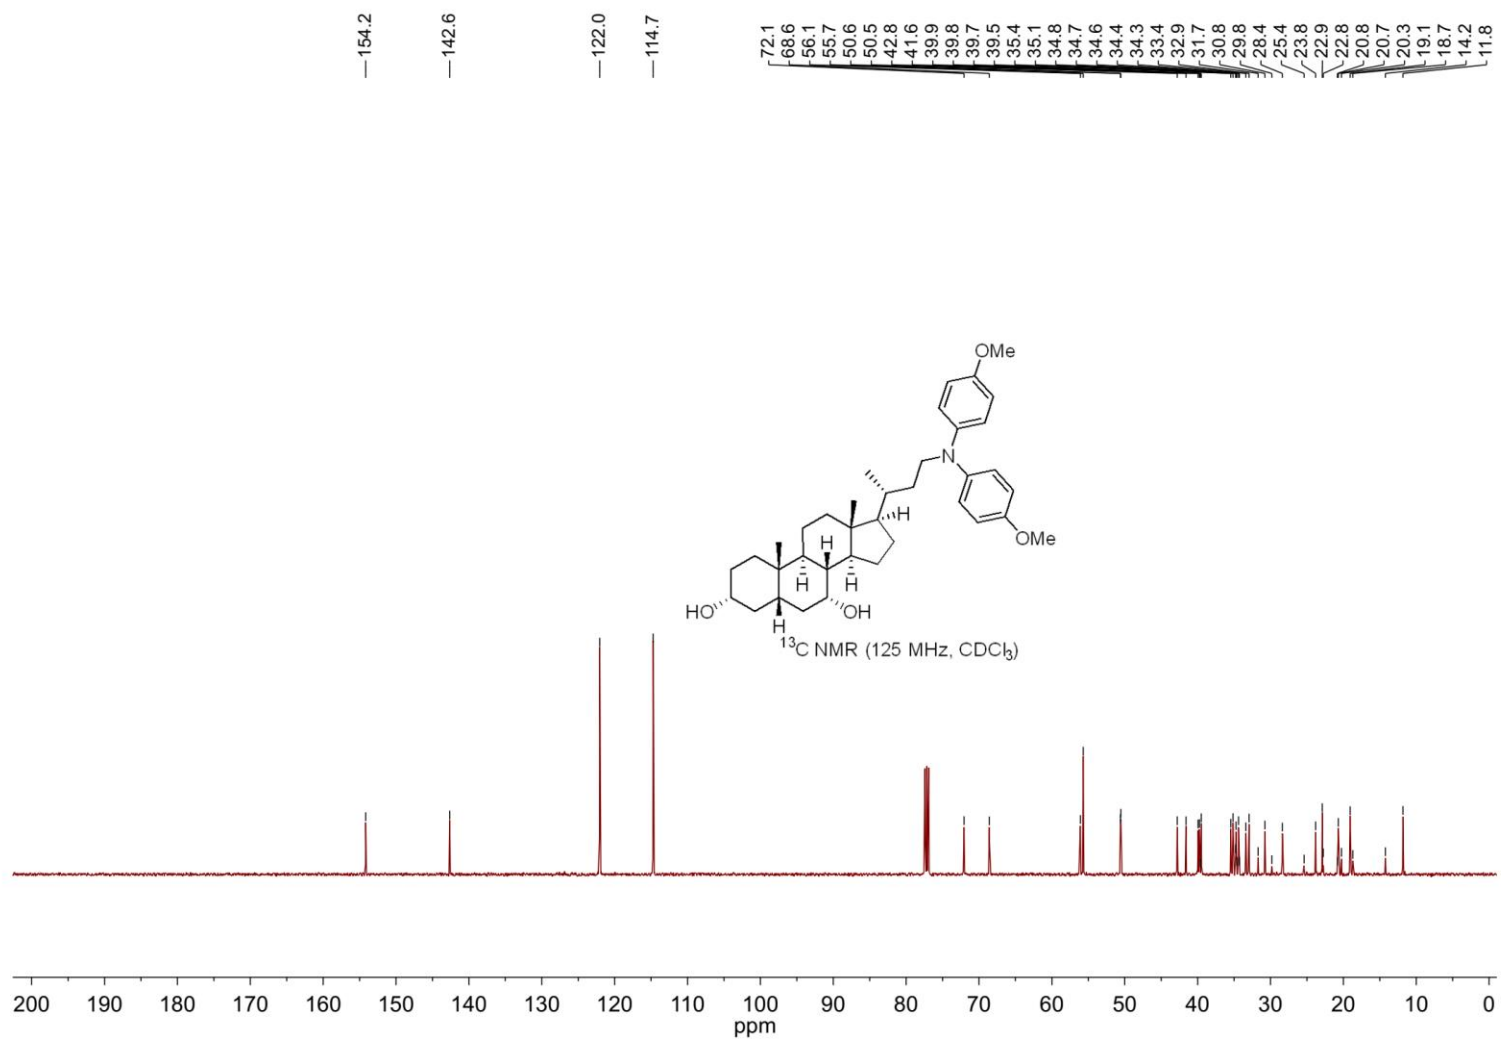

[Go back to table of contents](#)

**(3*R*,5*S*,7*R*,8*R*,9*S*,10*S*,12*S*,13*R*,14*S*,17*R*)-17-((*R*)-4-(Bis(4-methoxyphenyl)amino)butan-2-yl)-10,13-dimethylhexadecahydro-1*H*-cyclopenta[*a*]phenanthrene-3,7,12-triol (82)**

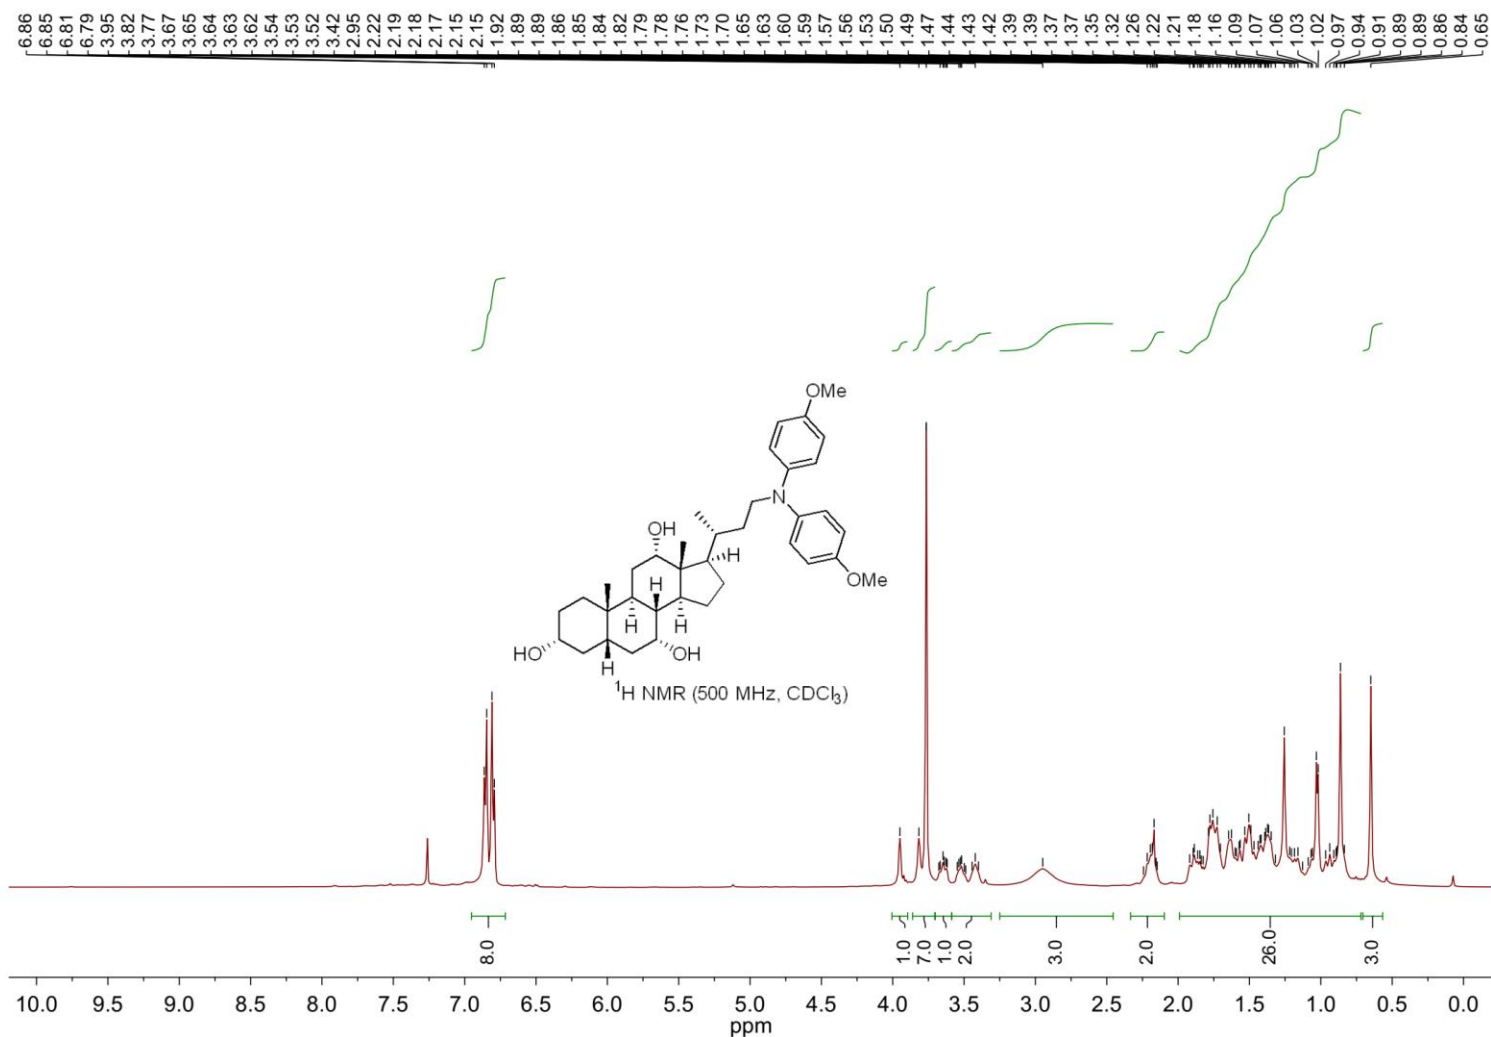

**(3*R*,5*S*,7*R*,8*R*,9*S*,10*S*,12*S*,13*R*,14*S*,17*R*)-17-((*R*)-4-(Bis(4-methoxyphenyl)amino)butan-2-yl)-10,13-dimethylhexadecahydro-1*H*-cyclopenta[*a*]phenanthrene-3,7,12-triol (82)**

—154.2      —142.6      —122.1      —114.7      —73.2  
—72.0      —68.6      —55.7      —50.7      —47.4      —46.5      —41.7      —41.6      —39.6      —35.4      —34.9      —34.8      —34.3      —33.4      —30.5      —29.8      —28.3      —27.7      —26.5      —23.3      —22.6      —18.1      —12.5

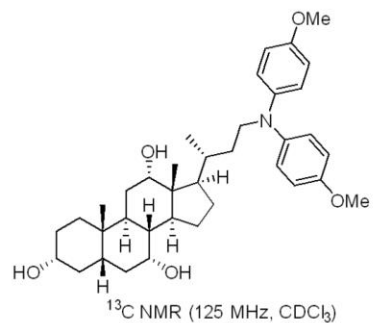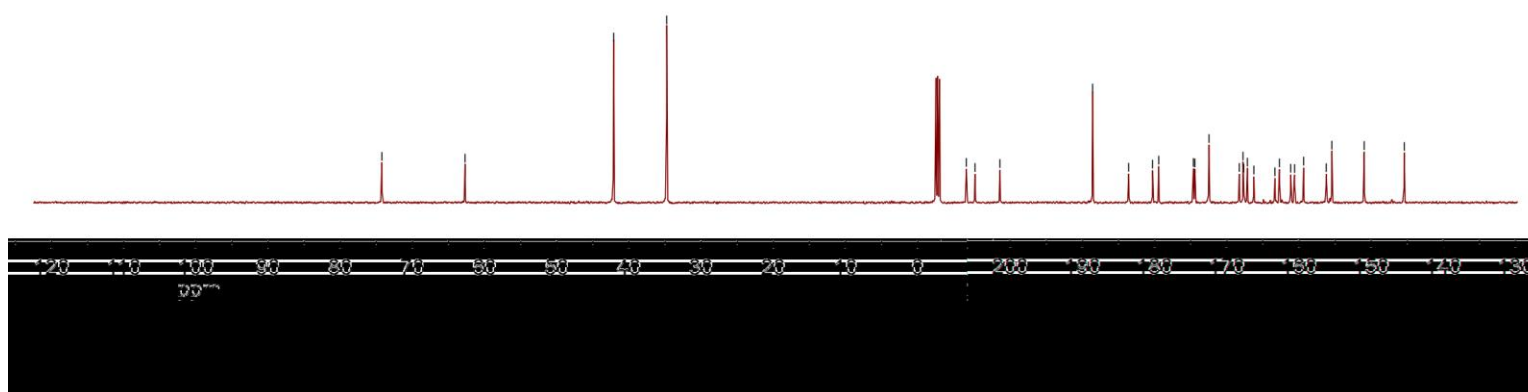

[Go back to table of contents](#)

1-(Tetrahydro-2H-pyran-4-yl)-1H-indol-5-ol (83)

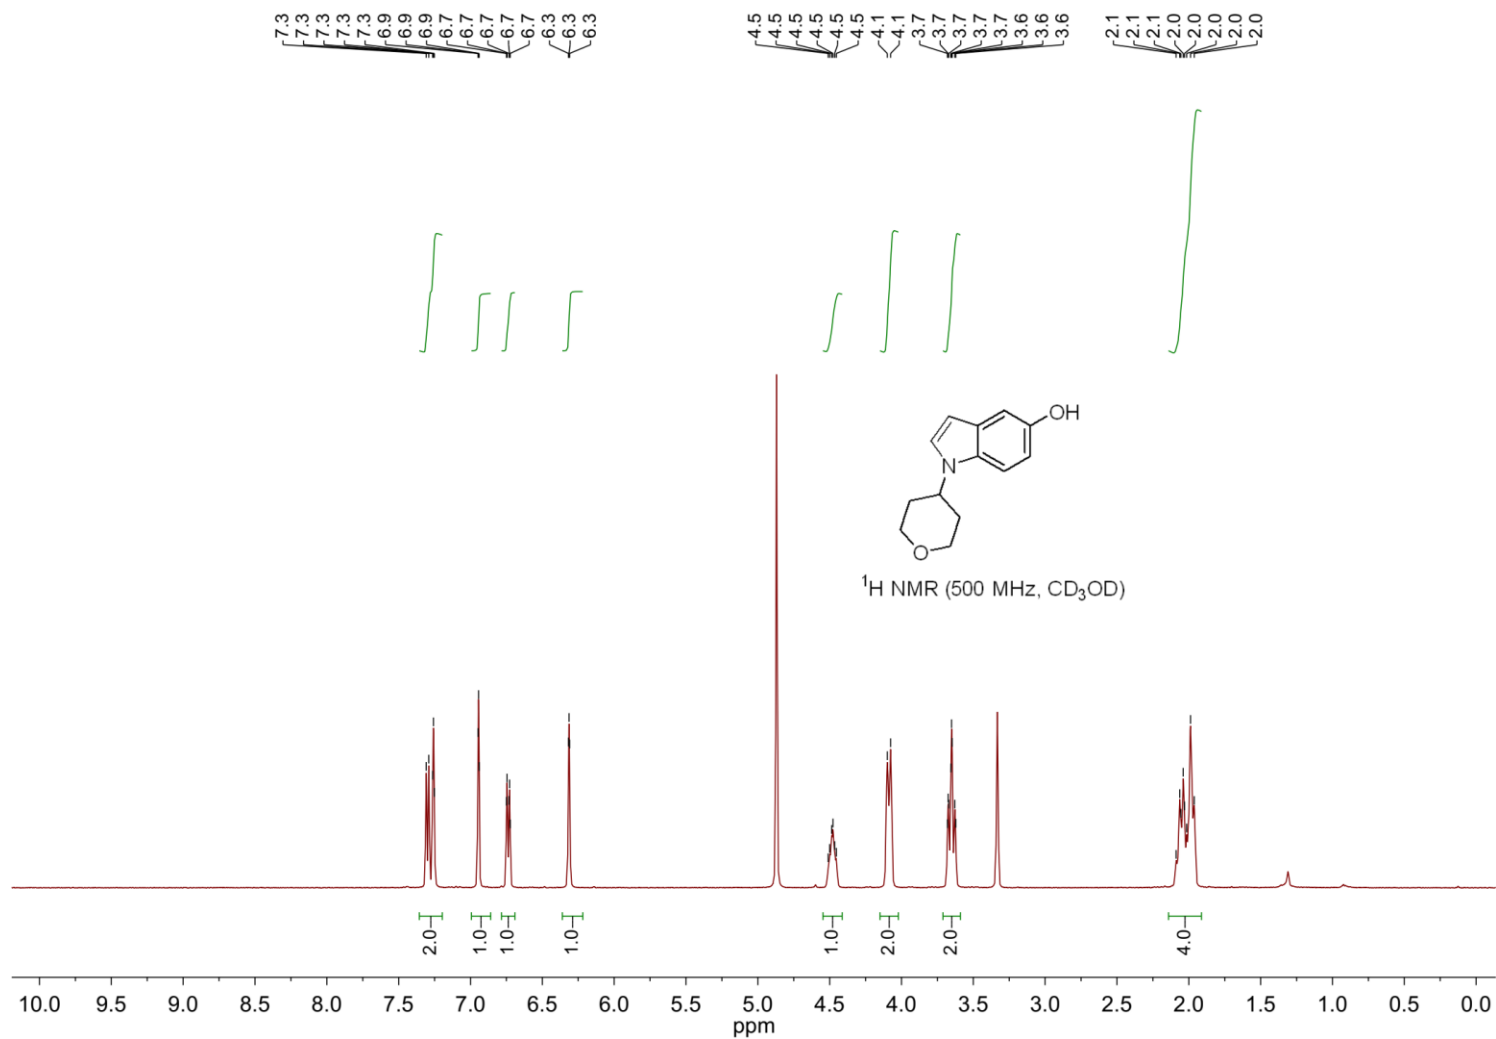

### 1-(Tetrahydro-2H-pyran-4-yl)-1H-indol-5-ol (83)

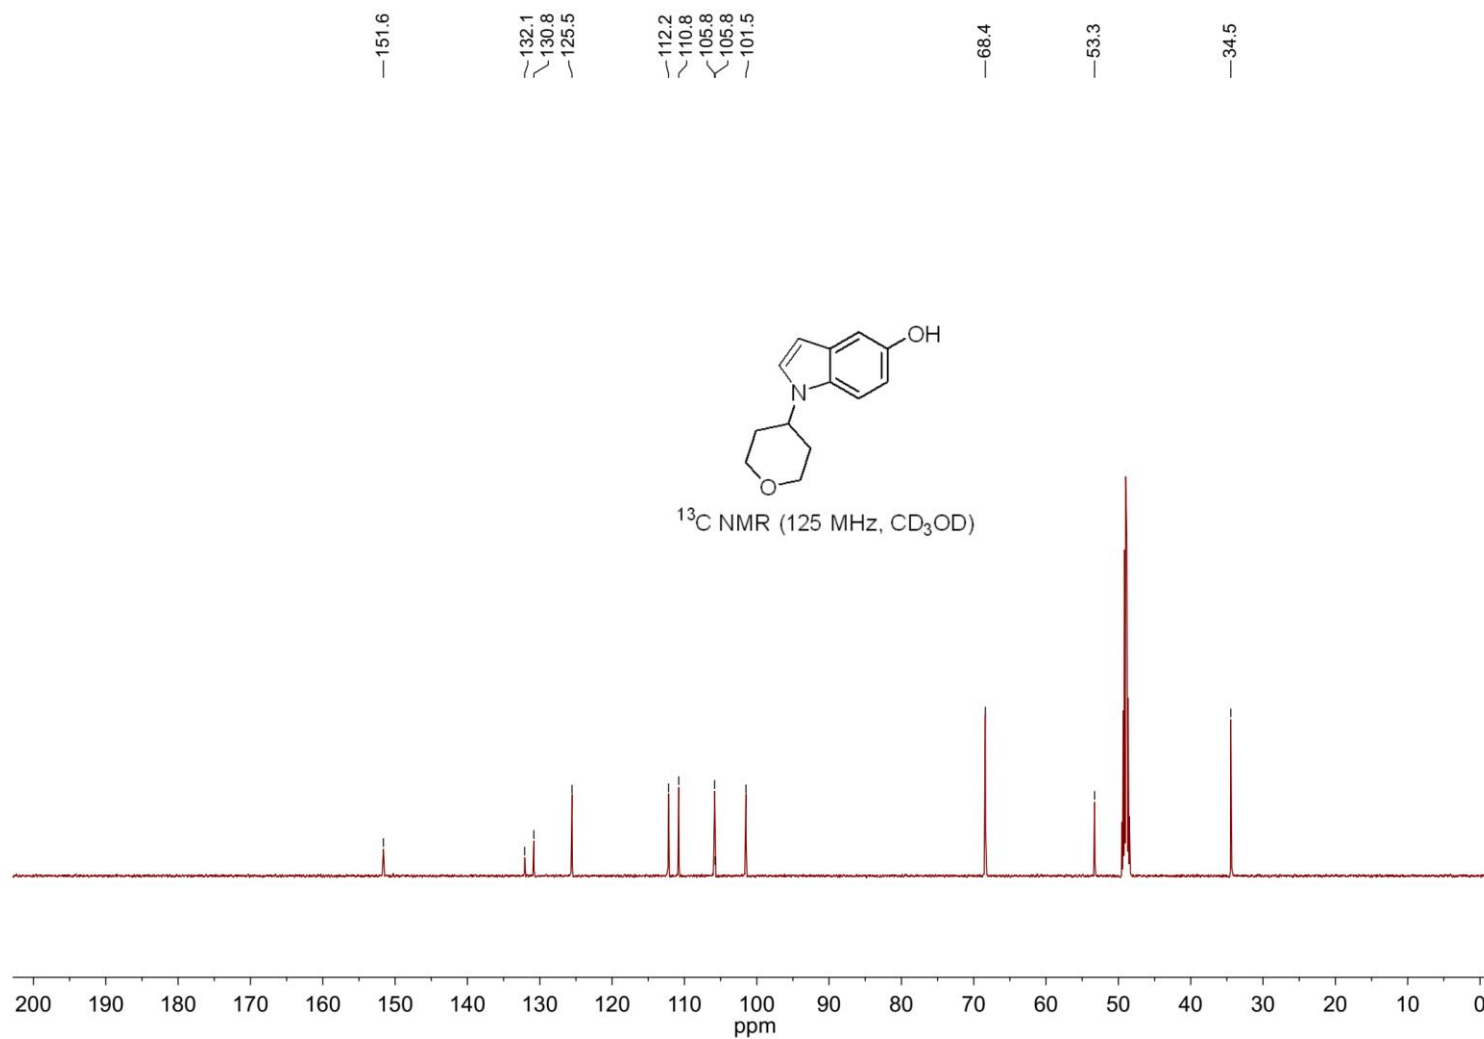

[Go back to table of contents](#)

### 4-Chloro-N-(methyl-*d*<sub>3</sub>)aniline (85)

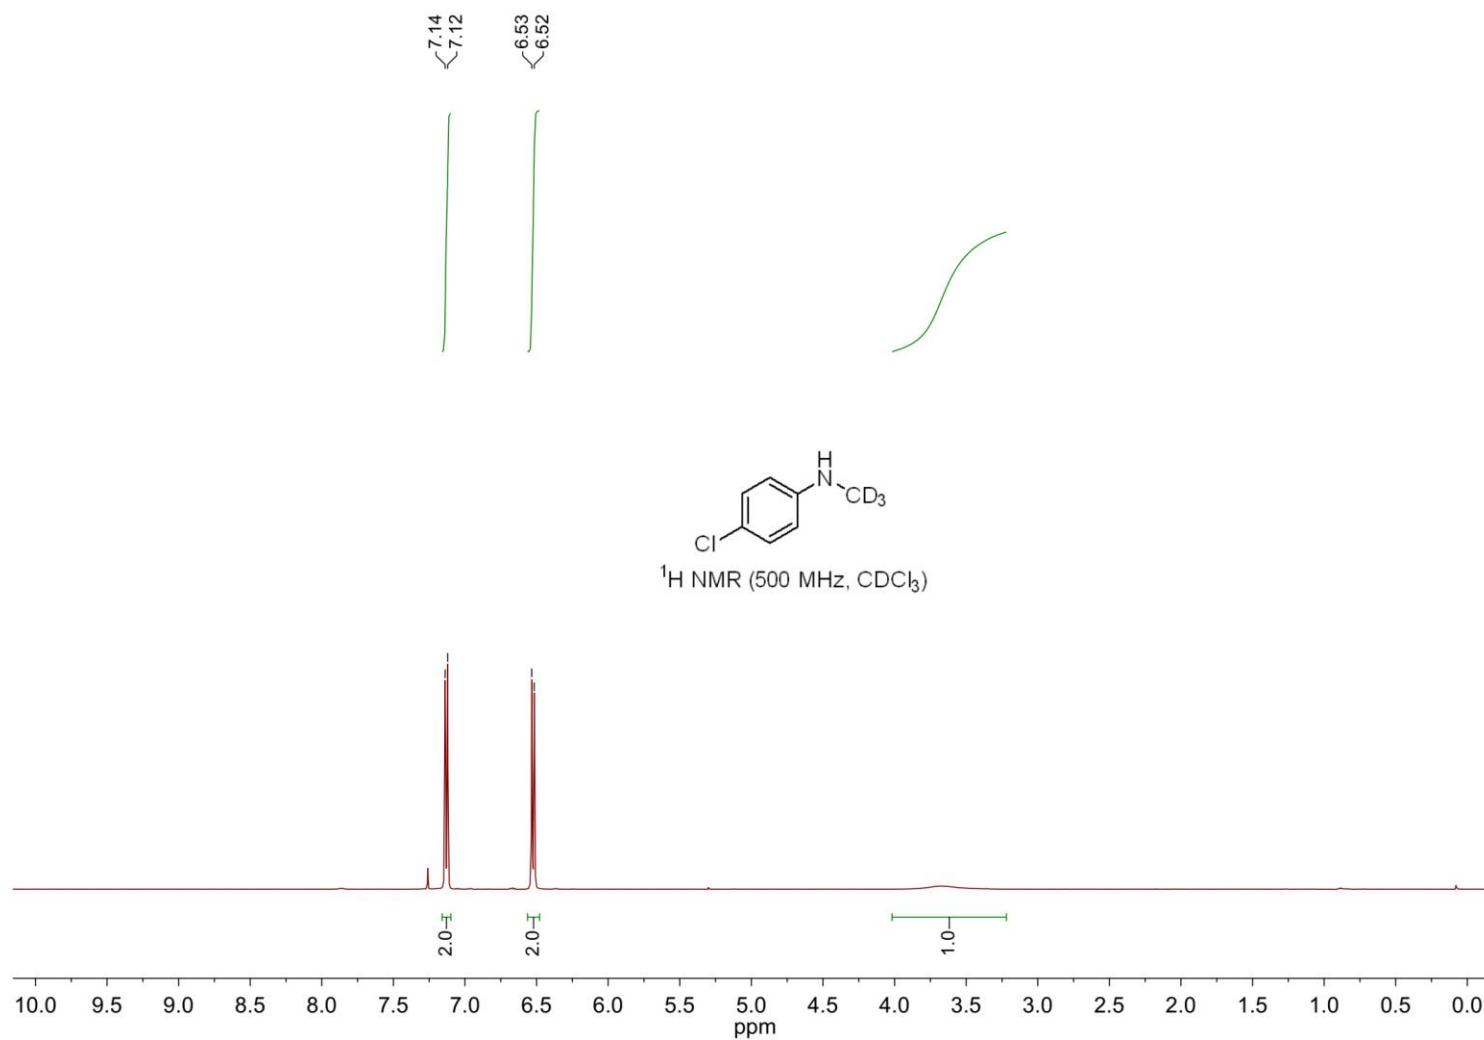

### 4-Chloro-*N*-(methyl-*d*<sub>3</sub>)aniline (85)

—148.0  
—129.1  
—121.9  
—113.6

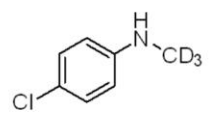

<sup>13</sup>C NMR (125 MHz, CDCl<sub>3</sub>)

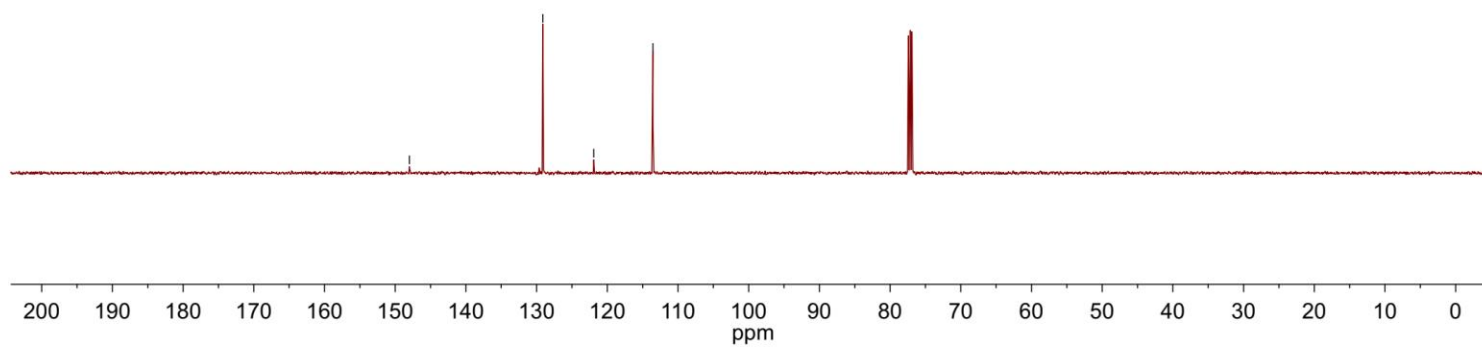

[Go back to table of contents](#)



### 4-Chloro-*N*-(methyl-*d*<sub>3</sub>)aniline (85)

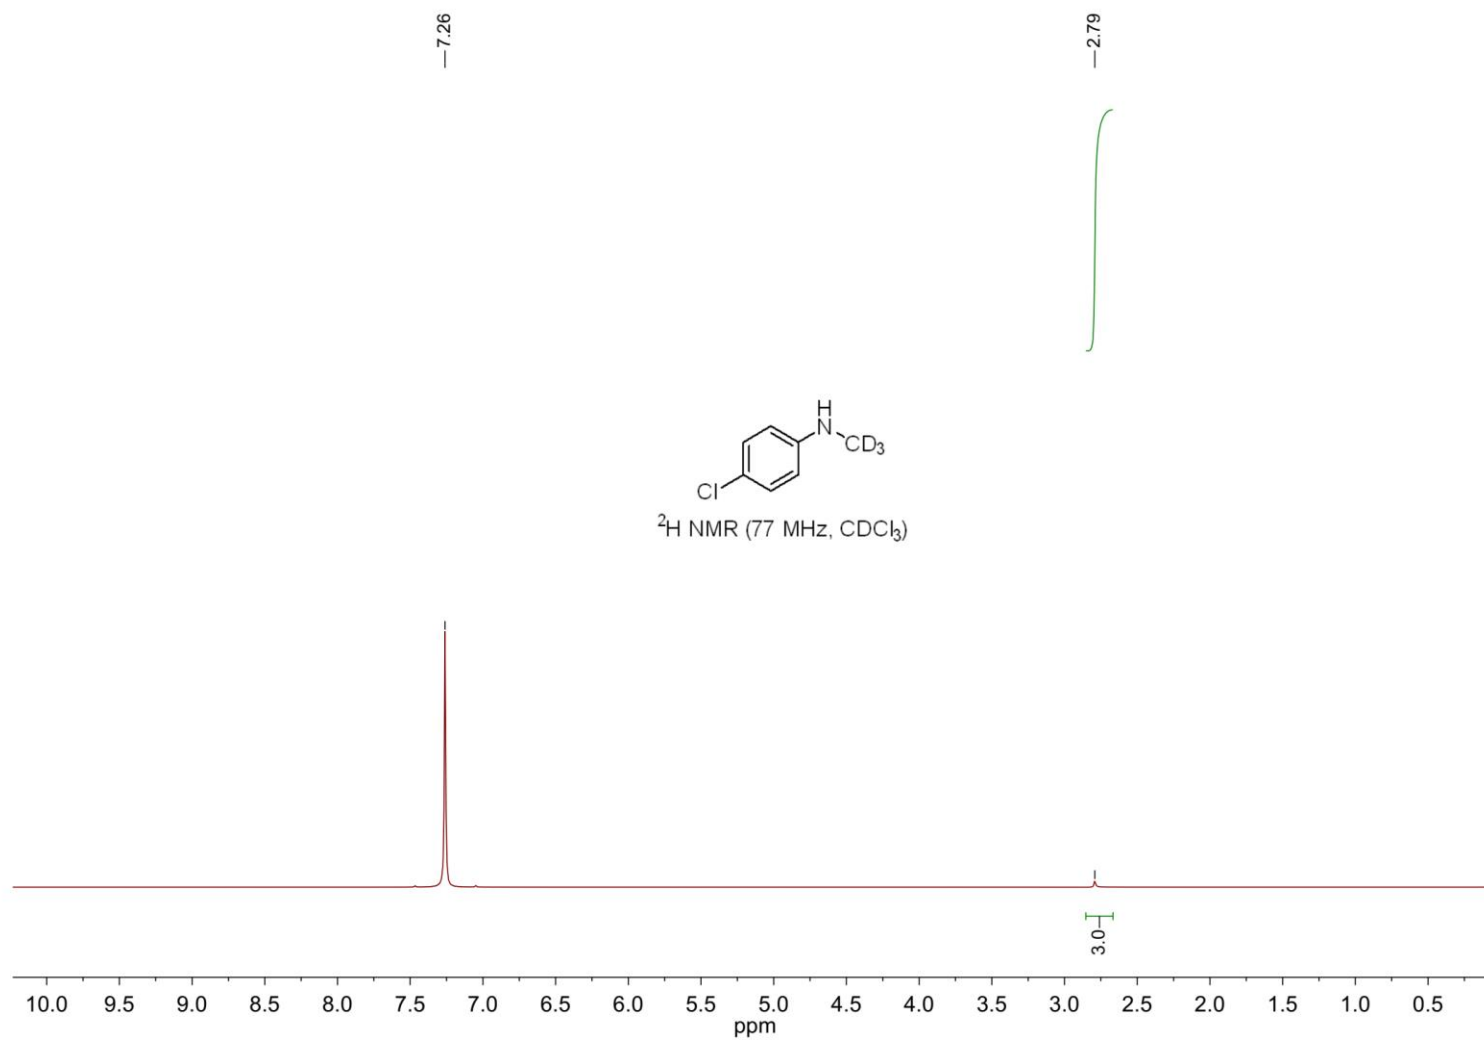

***N*-(Methyl-*d*<sub>3</sub>)-4-(trifluoromethyl)aniline (86)**

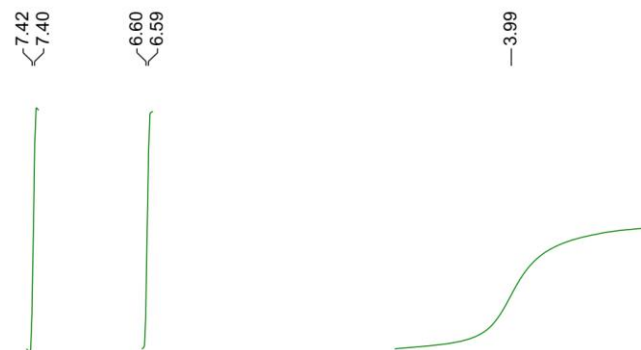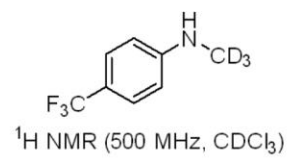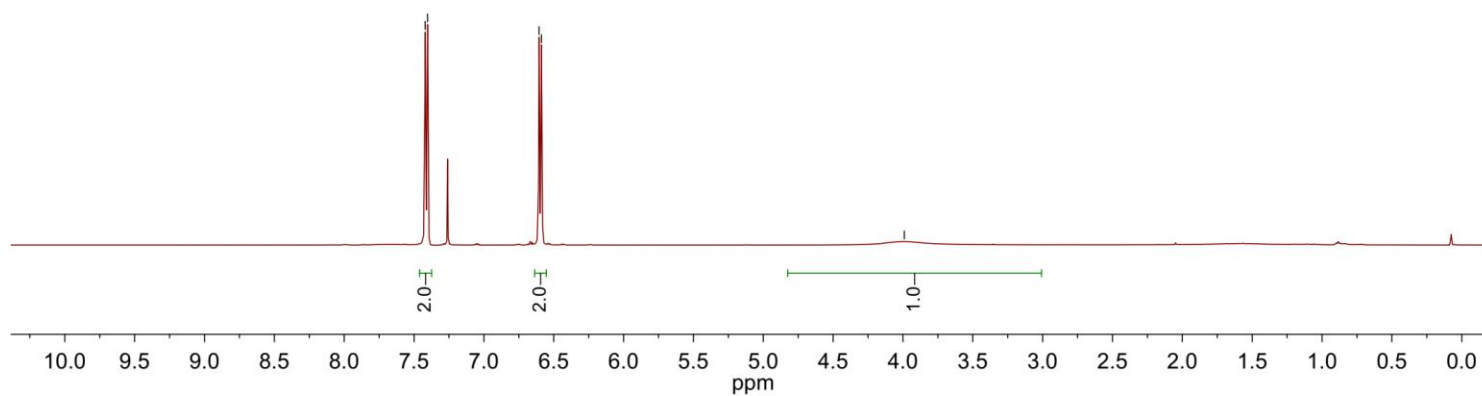

### *N*-(Methyl-*d*<sub>3</sub>)-4-(trifluoromethyl)aniline (86)

—151.8  
126.7  
126.7  
126.3  
124.1  
120.4  
119.1  
118.9  
118.6  
118.4  
—111.6

—29.9

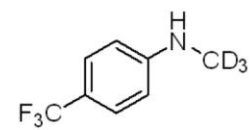

<sup>13</sup>C NMR (125 MHz, CDCl<sub>3</sub>)

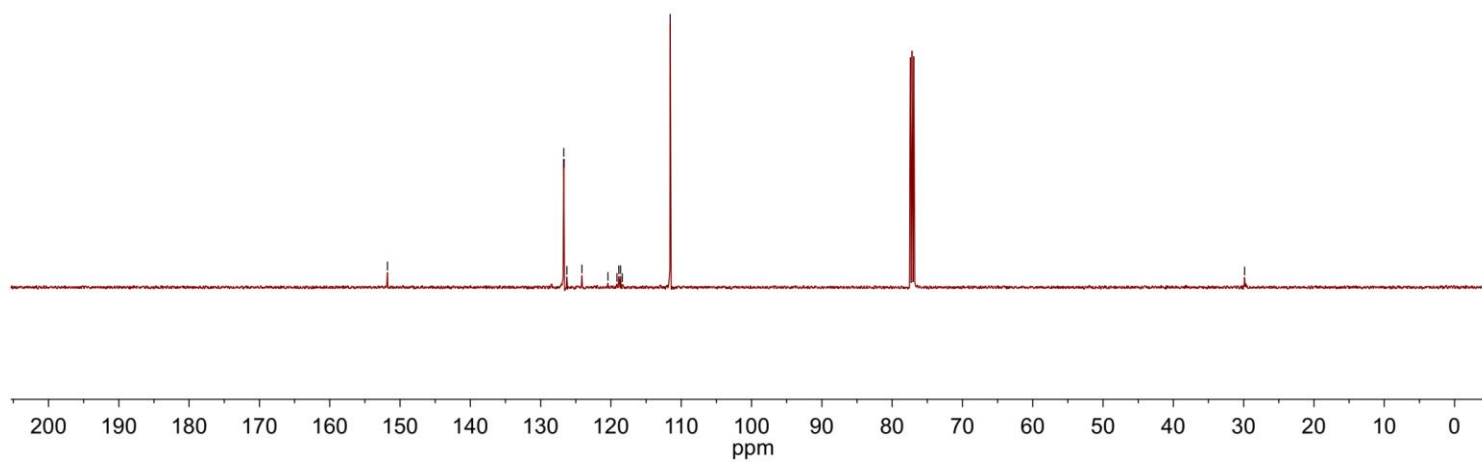

***N*-(Methyl-*d*<sub>3</sub>)-4-(trifluoromethyl)aniline (86)**

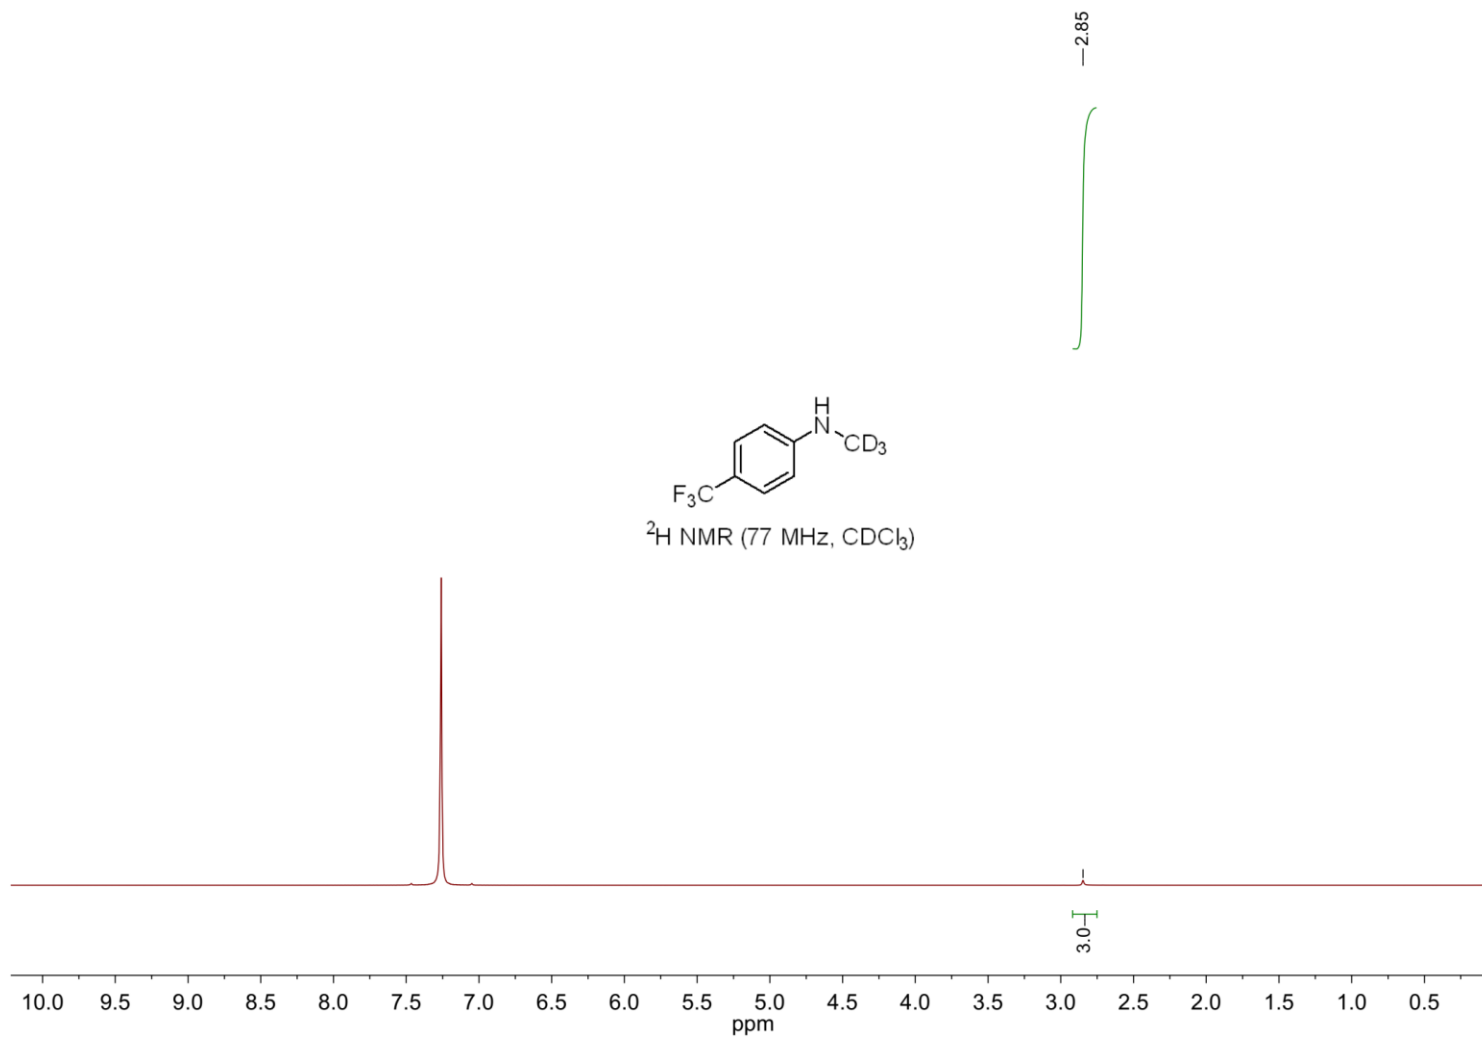



***N*-(Methyl-*d*<sub>3</sub>)-3-(methylsulfonyl)aniline (87)**

—150.0  
—141.4  
—130.2  
~117.4  
~115.3  
~109.8  
—44.6

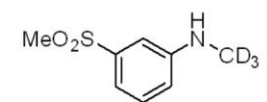

<sup>13</sup>C NMR (125 MHz, CDCl<sub>3</sub>)

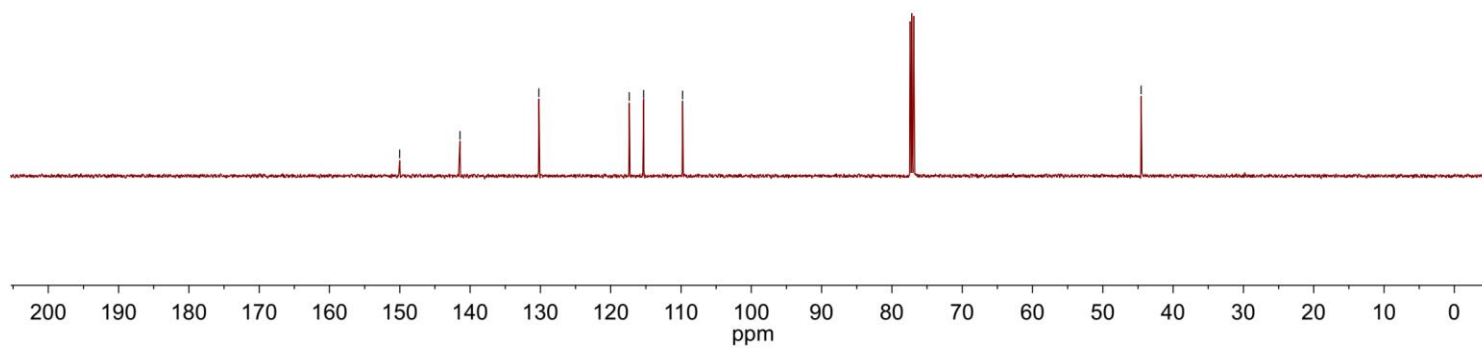

***N*-(Methyl-*d*<sub>3</sub>)-3-(methylsulfonyl)aniline (87)**

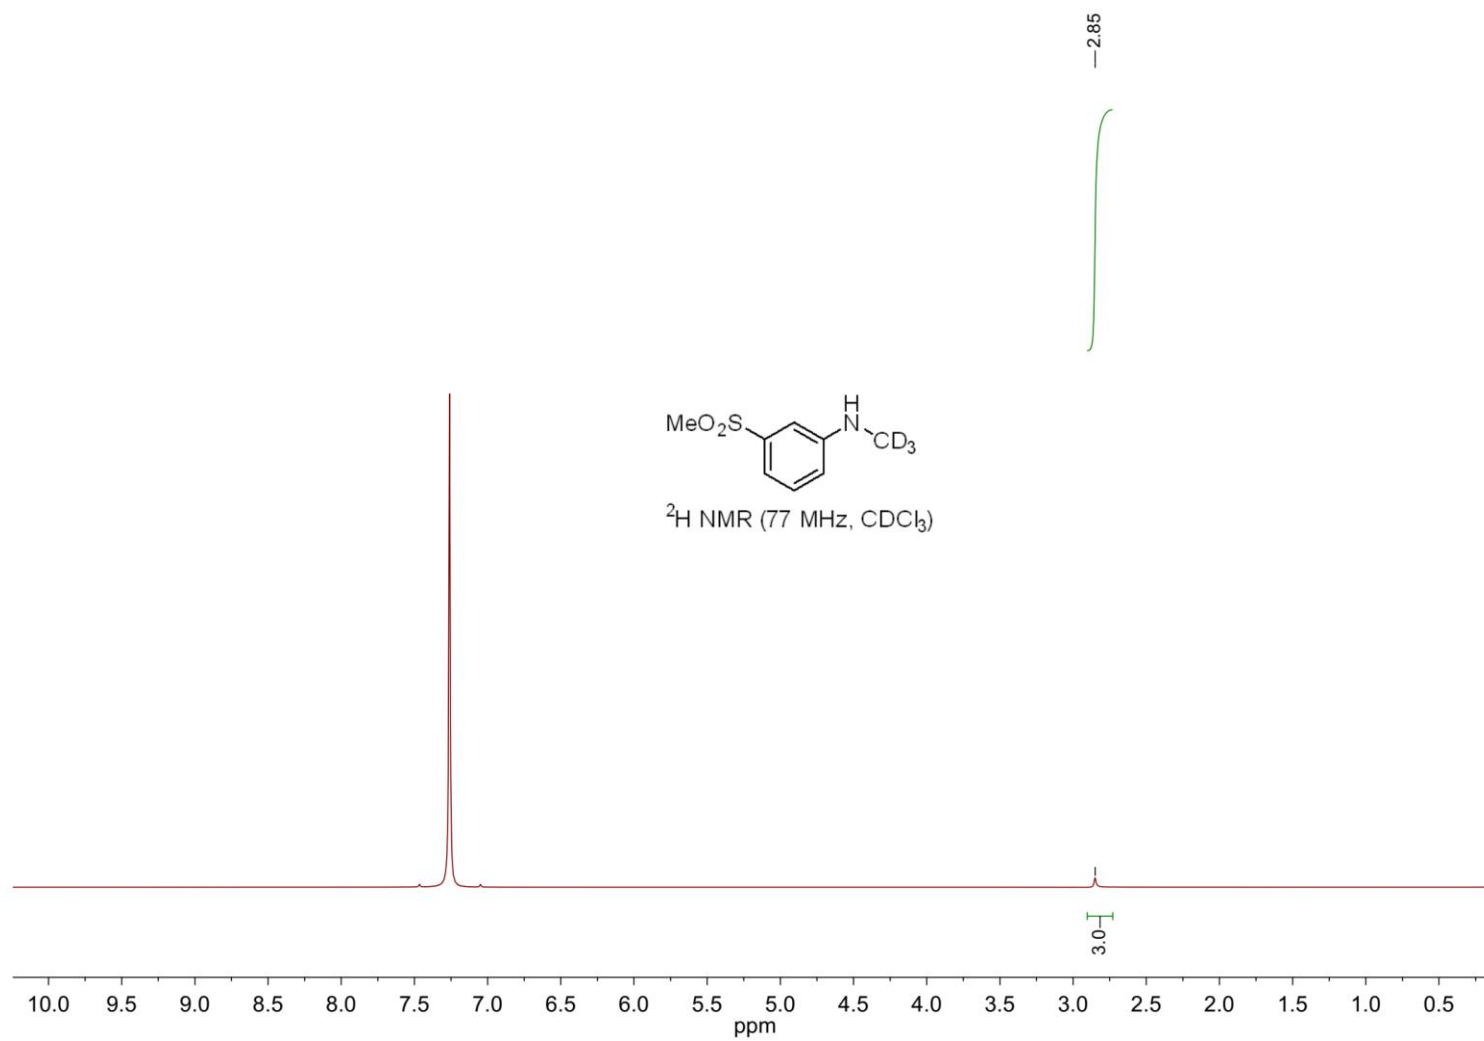

***N*-(Methyl-*d*<sub>3</sub>)-3-(pentafluoro-λ<sup>6</sup>-sulfaneyl)aniline (88)**

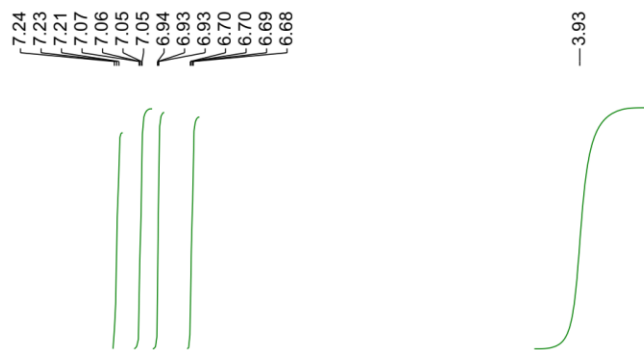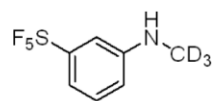

<sup>1</sup>H NMR (500 MHz, CDCl<sub>3</sub>)

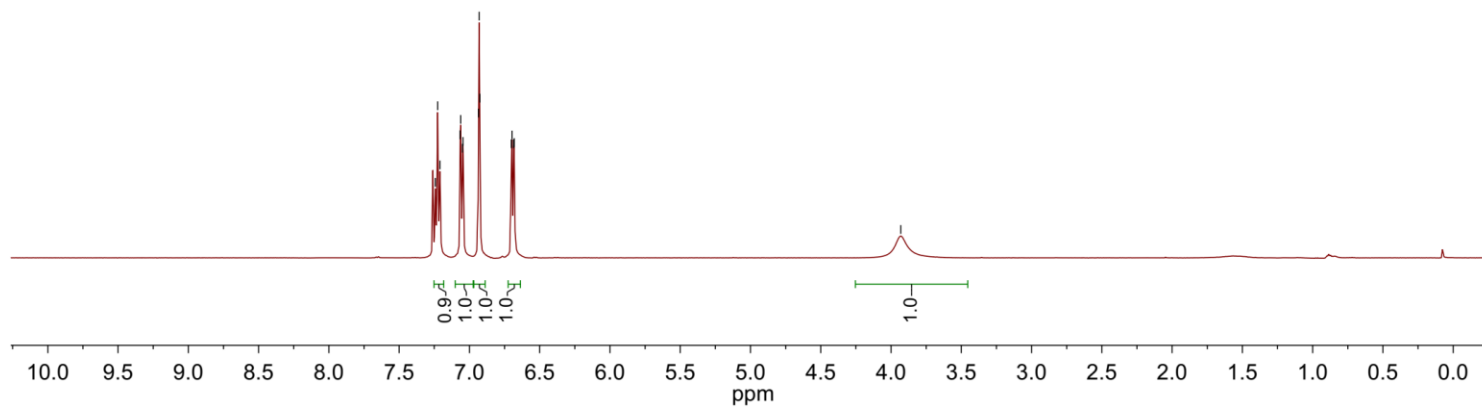

[Go back to table of contents](#)



***N*-(Methyl-*d*<sub>3</sub>)-3-(pentafluoro- $\lambda^6$ -sulfaneyl)aniline (88)**

155.4  
155.3  
155.1  
149.5

129.3  
115.1  
114.5  
114.5  
114.4  
114.4  
114.3  
109.6  
109.6  
109.5  
109.5

29.9

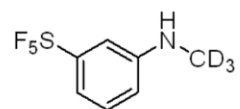

<sup>13</sup>C NMR (125 MHz, CDCl<sub>3</sub>)

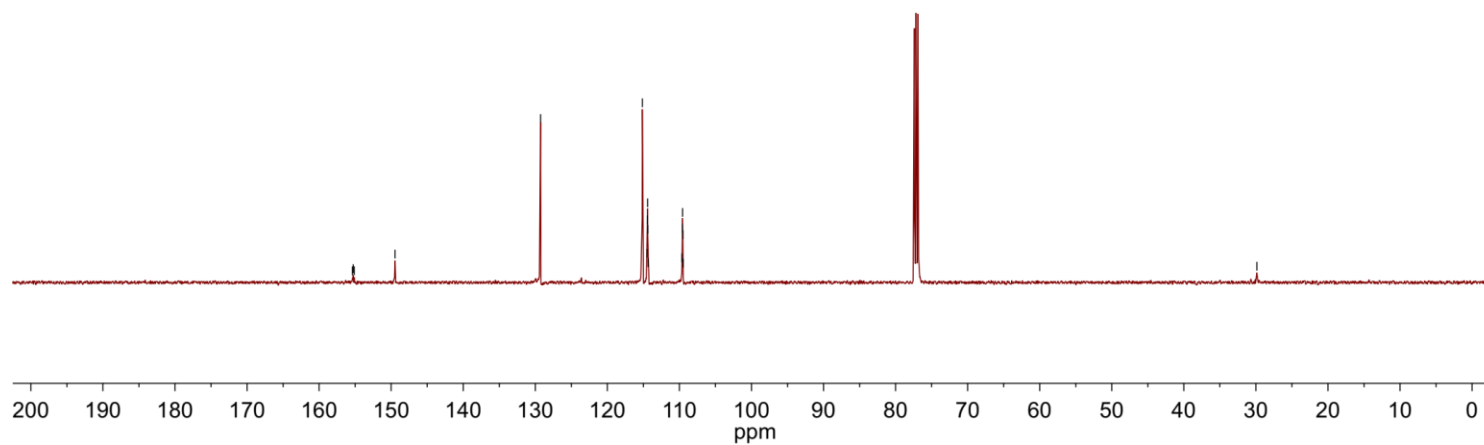

***N*-(Methyl-*d*<sub>3</sub>)-3-(pentafluoro-λ<sup>6</sup>-sulfaneyl)aniline (88)**

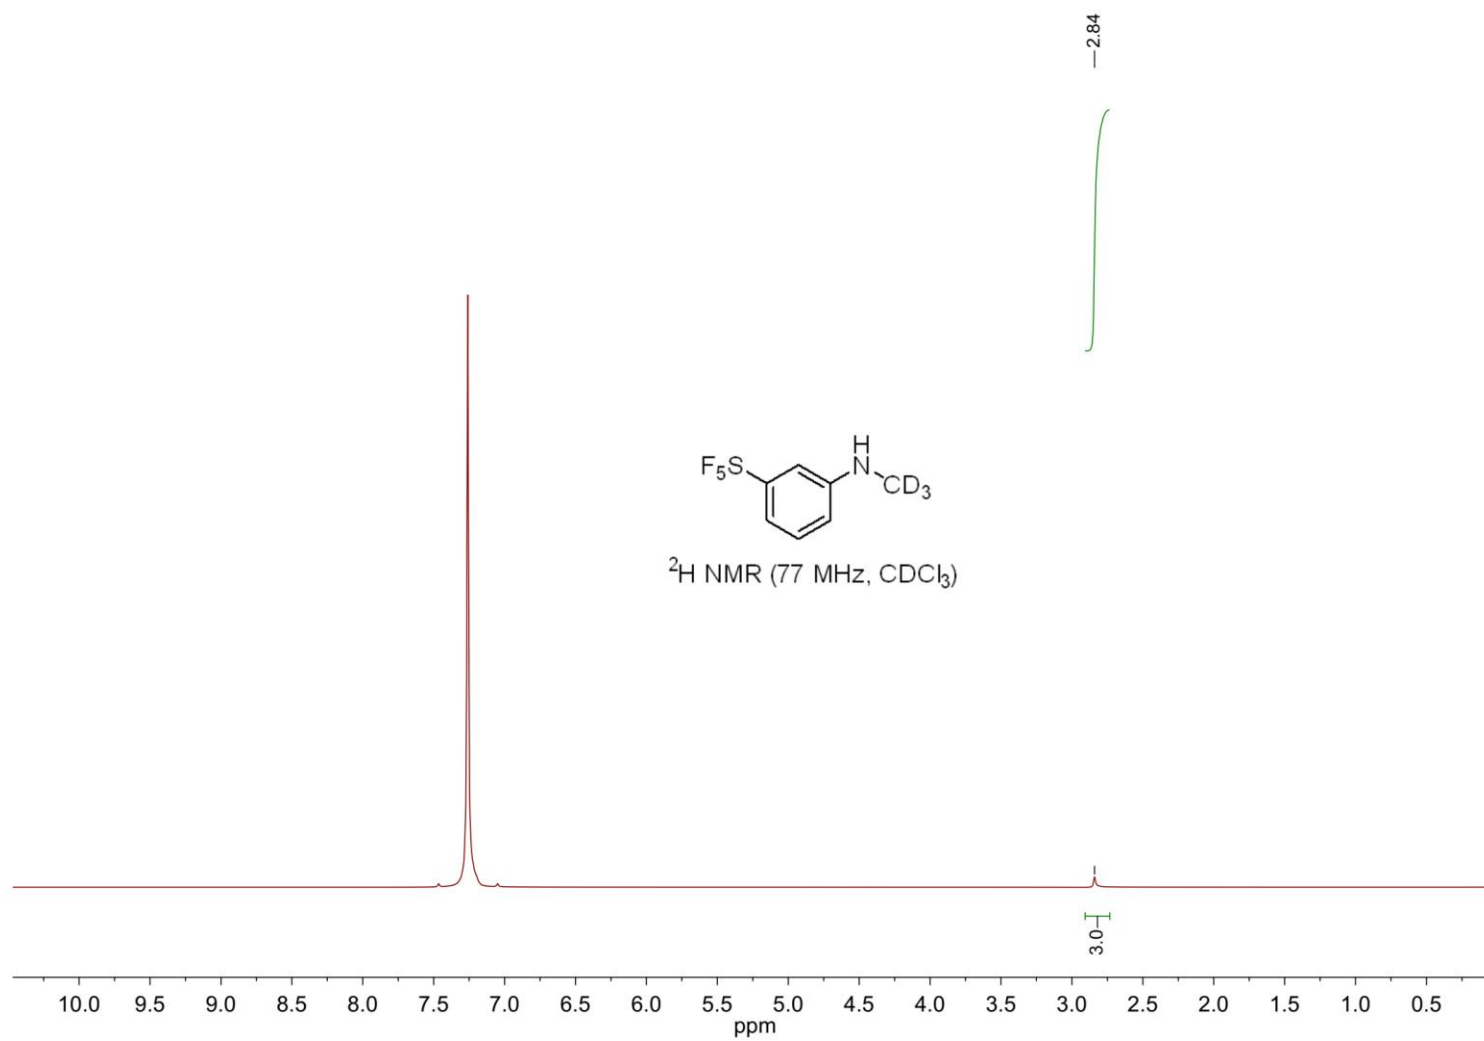

### 4-(Difluoromethoxy)-*N*-(methyl-*d*<sub>3</sub>)aniline (89)

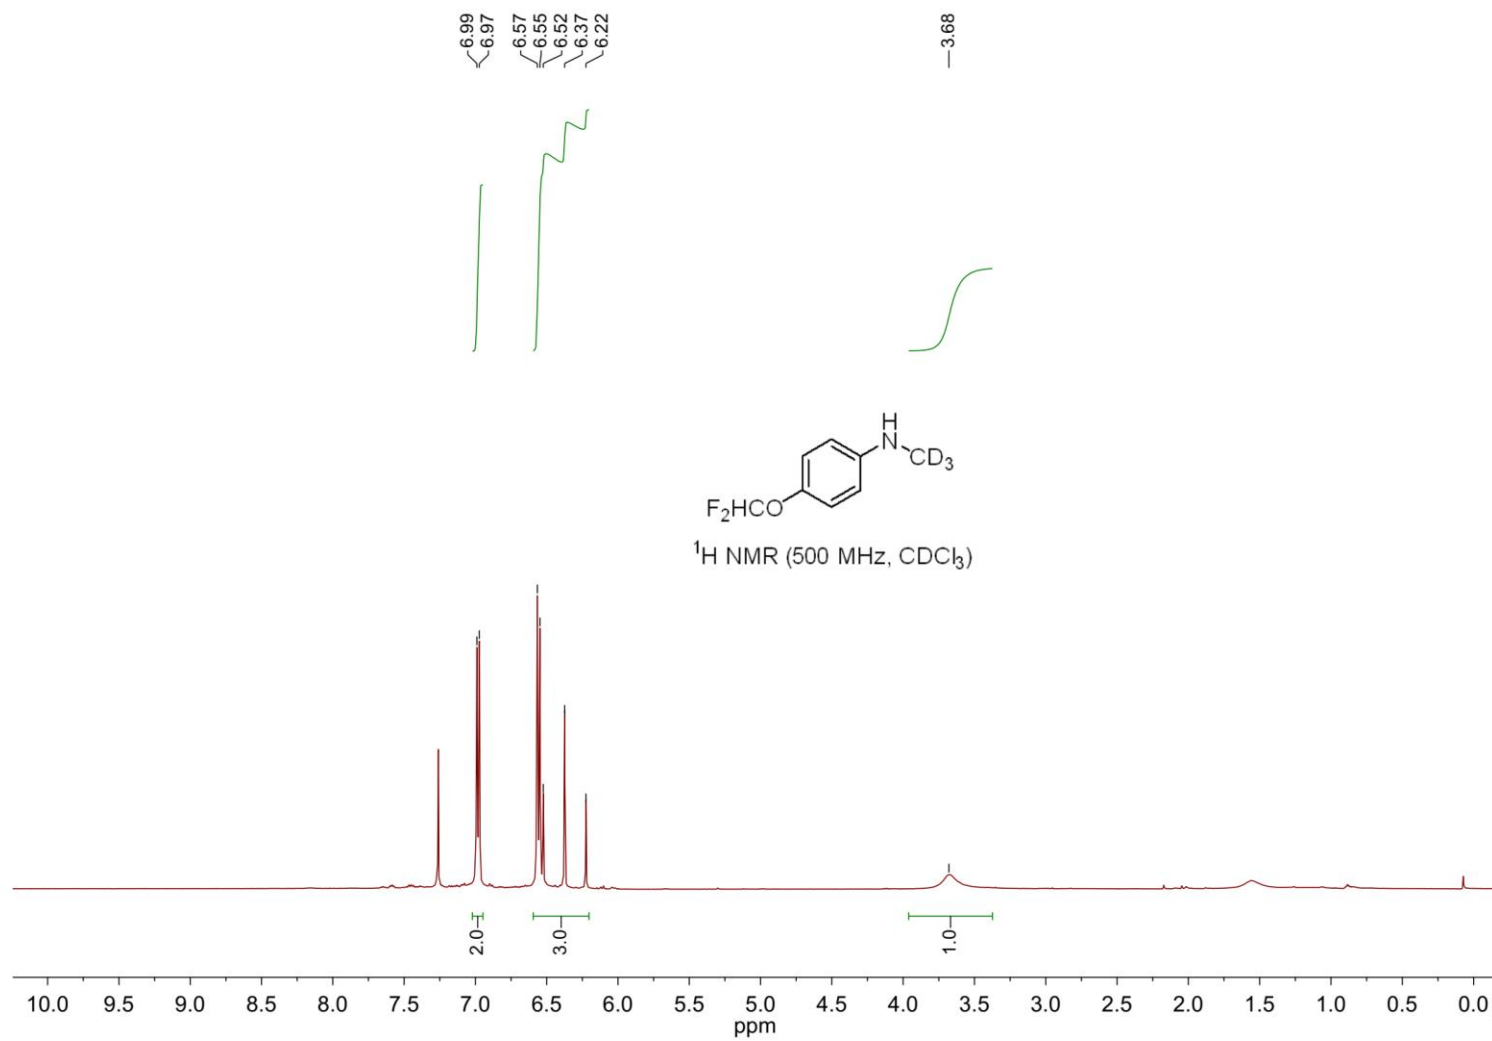

4-(Difluoromethoxy)-*N*-(methyl-*d*<sub>3</sub>)aniline (89)

— 147.4  
— 142.5  
/ 121.6  
/ 118.8  
/ 116.7  
/ 114.7  
/ 113.0

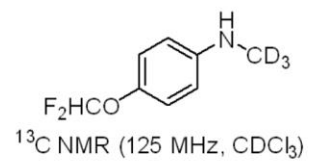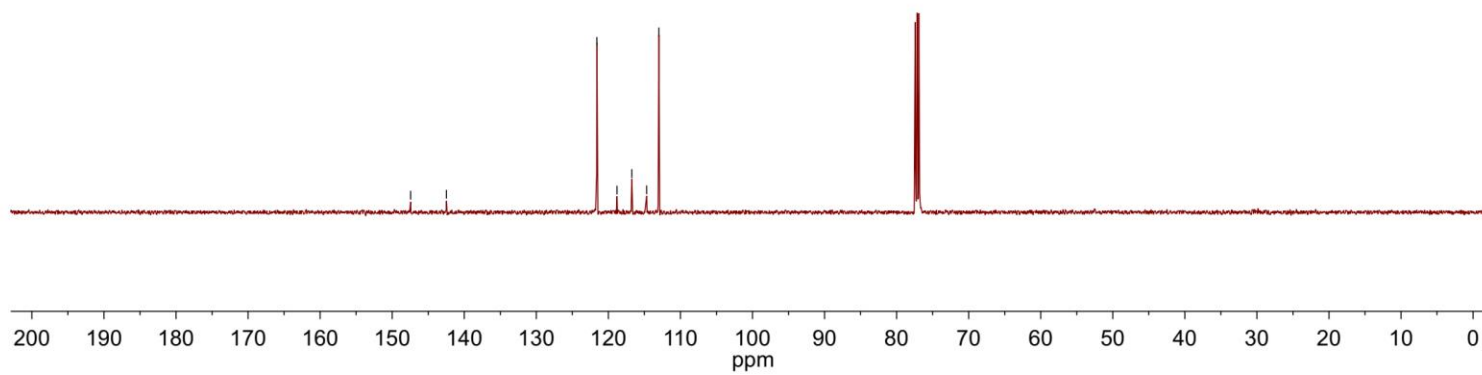

4-(Difluoromethoxy)-*N*-(methyl-*d*<sub>3</sub>)aniline (89)

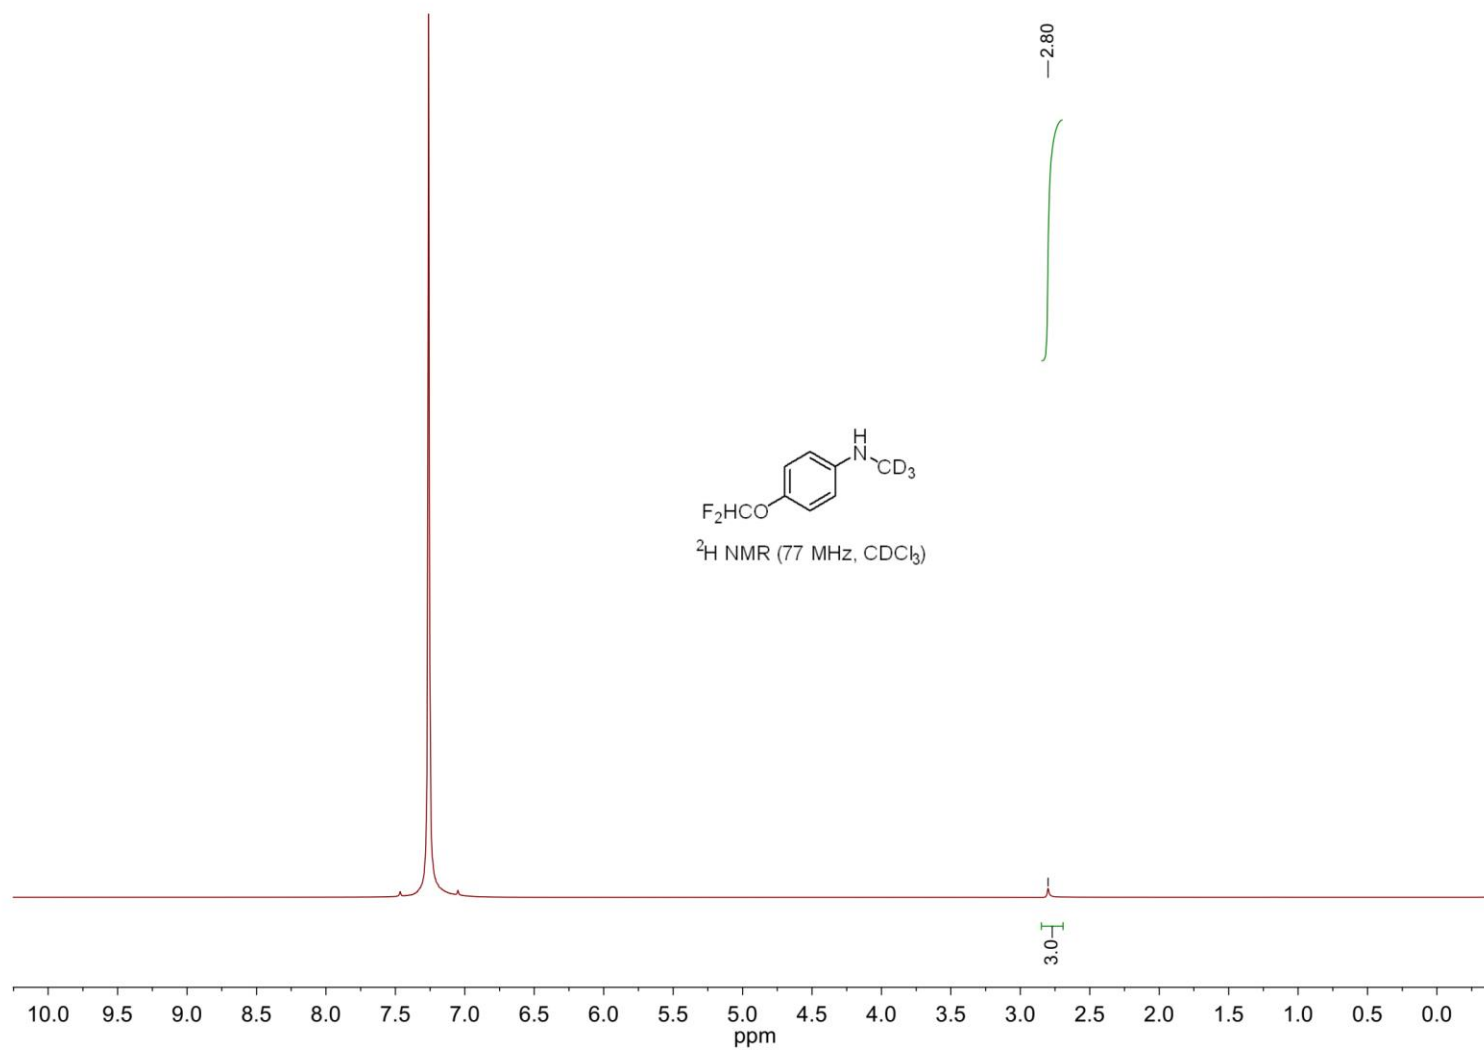

**N-(Methyl-*d*<sub>3</sub>)-[1,1'-biphenyl]-4-amine (90)**

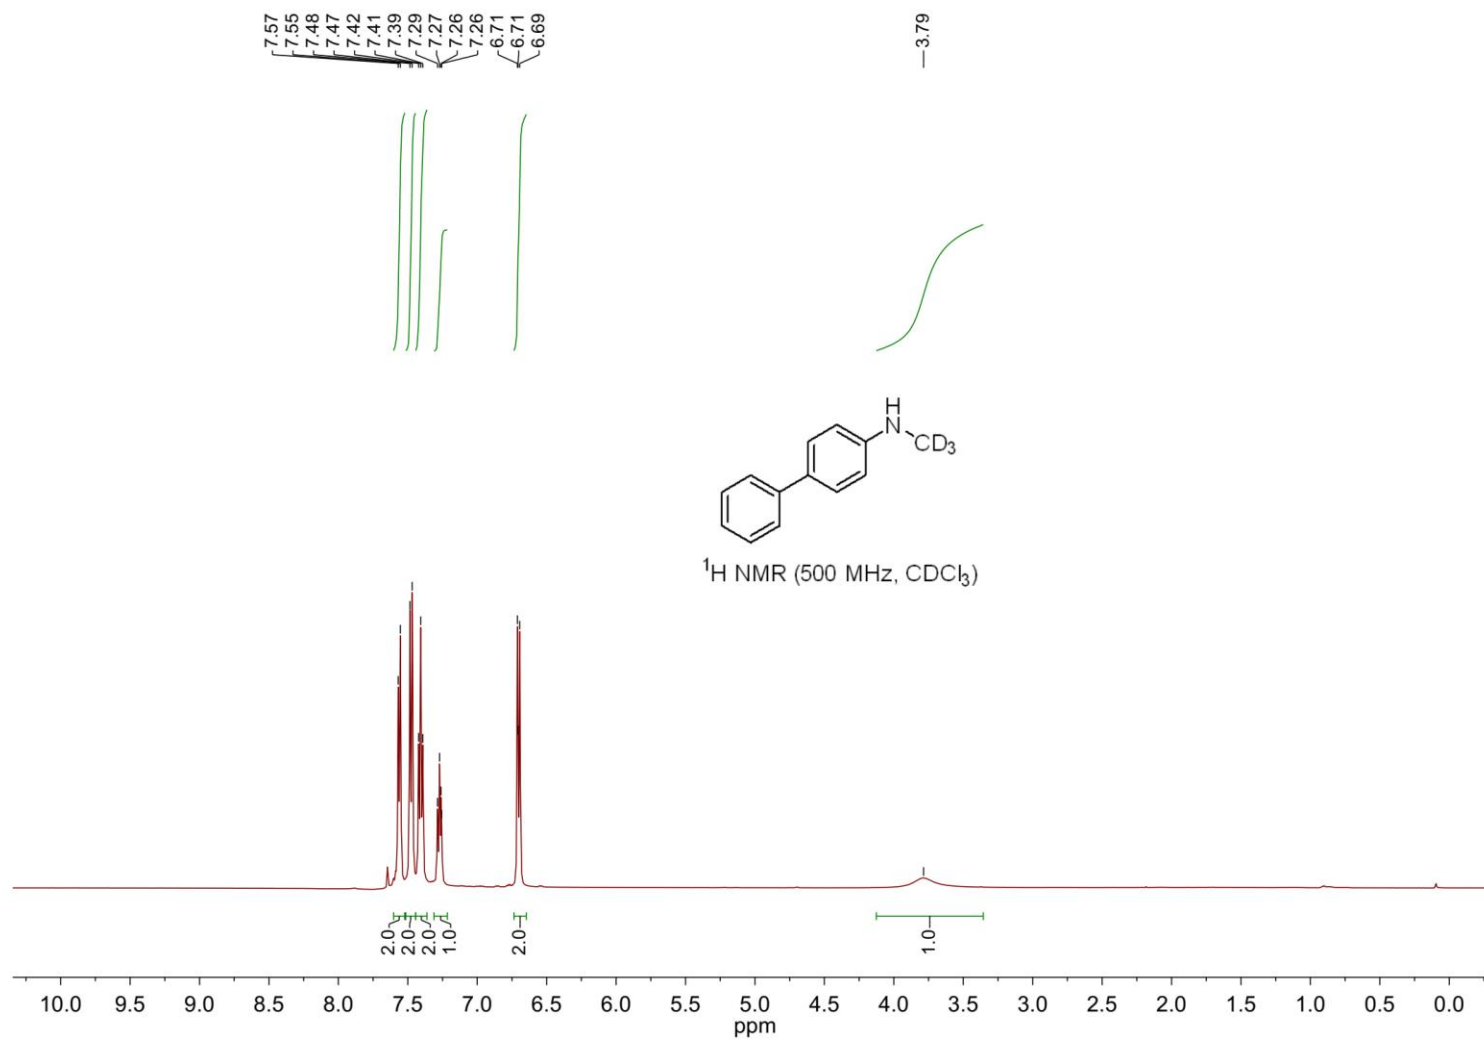

***N*-(Methyl-*d*<sub>3</sub>)-[1,1'-biphenyl]-4-amine (90)**

— 148.9  
— 141.4  
130.3  
128.8  
128.0  
126.4  
126.2  
— 112.8

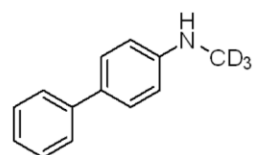

<sup>13</sup>C NMR (125 MHz, CDCl<sub>3</sub>)

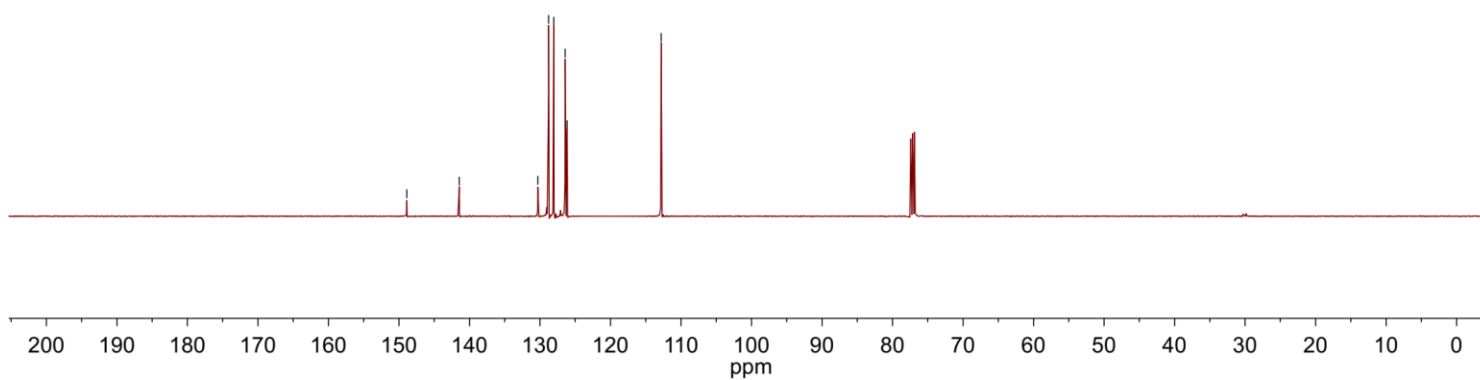

[Go back to table of contents](#)

***N*-(Methyl-*d*<sub>3</sub>)-[1,1'-biphenyl]-4-amine (90)**

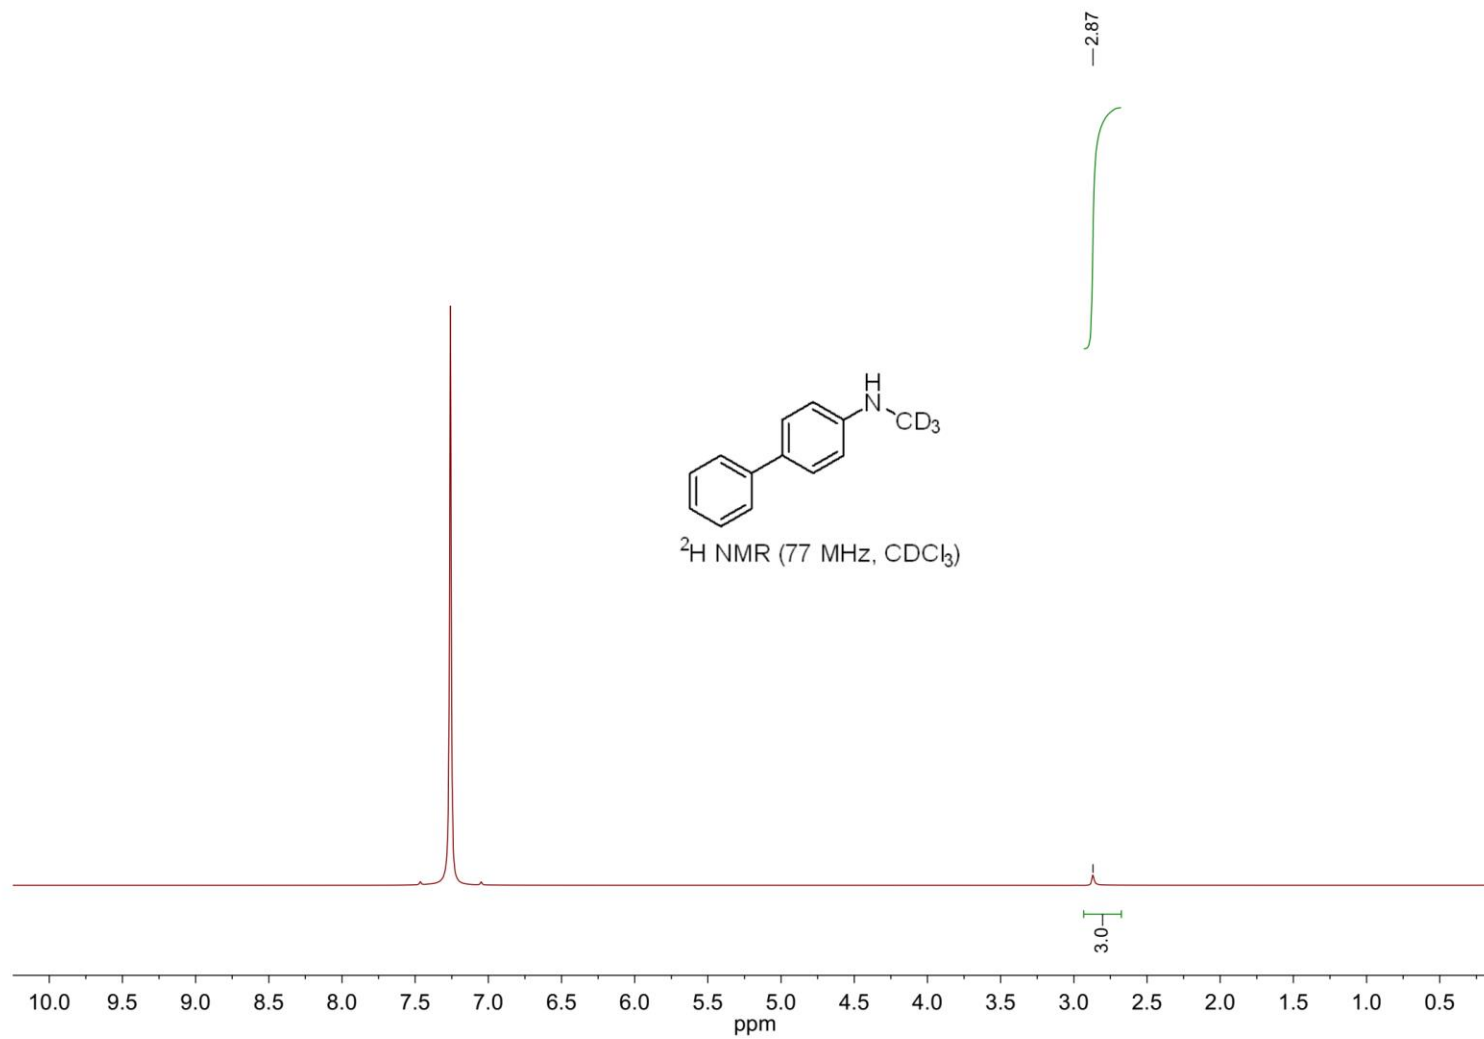



### N-(Methyl-*d*<sub>3</sub>)naphthalen-2-amine (91)

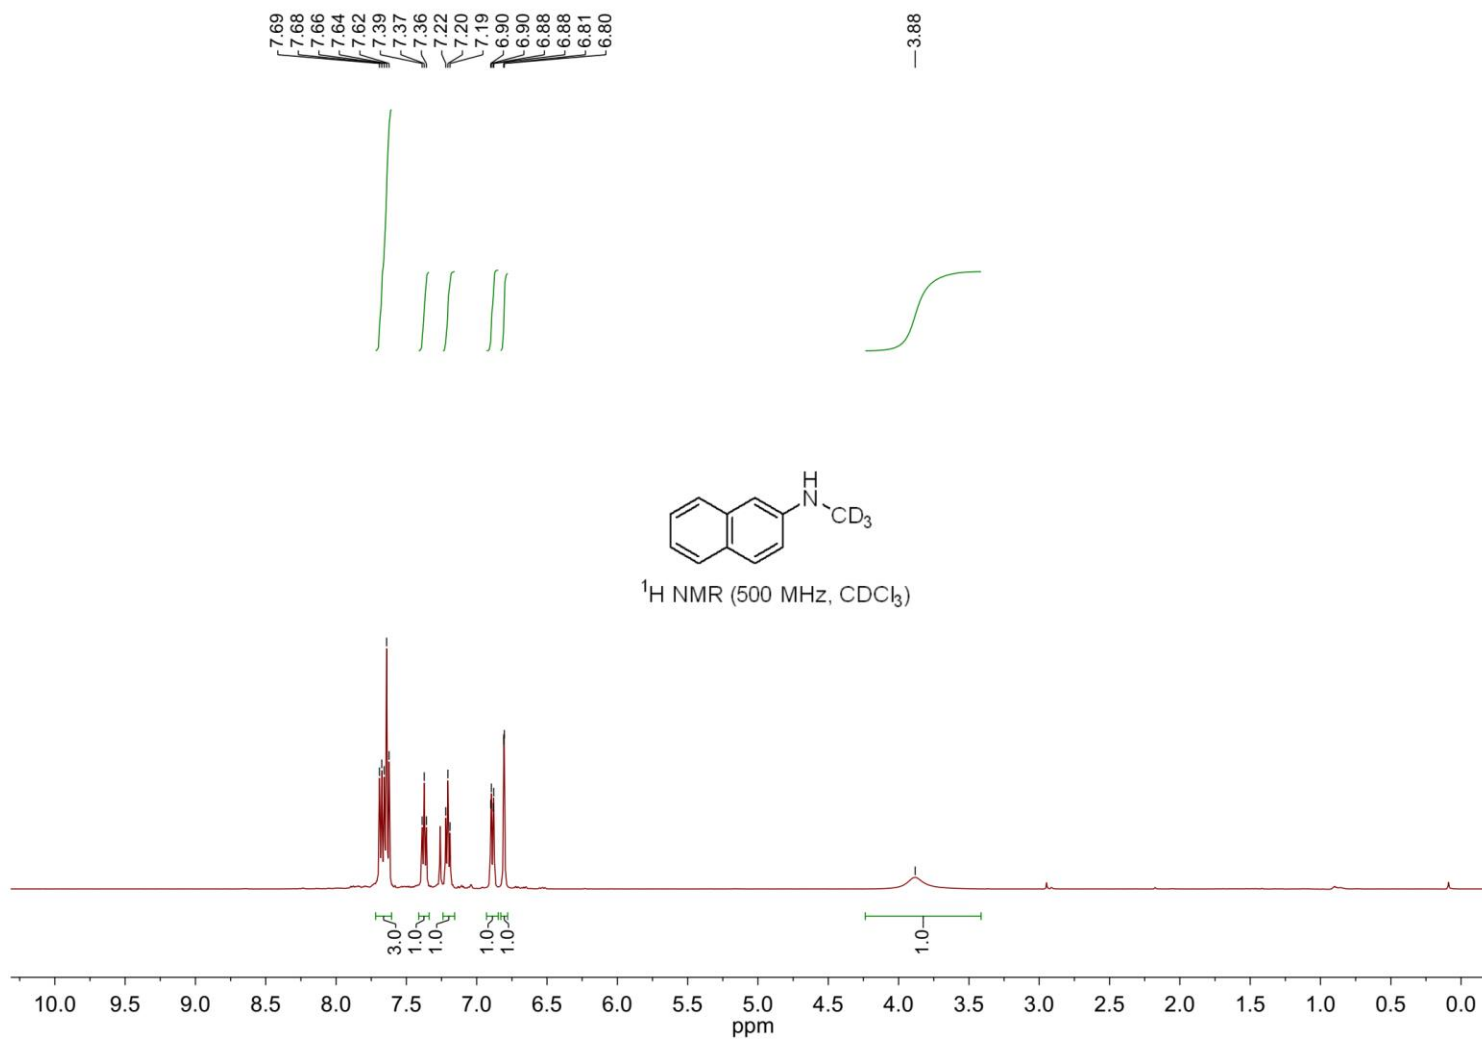

[Go back to table of contents](#)

### ***N*-(Methyl-*d*<sub>3</sub>)naphthalen-2-amine (91)**

—147.1  
135.4  
129.0  
127.8  
127.6  
126.4  
126.1  
122.0  
118.0  
—103.9

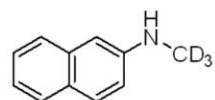

<sup>13</sup>C NMR (125 MHz, CDCl<sub>3</sub>)

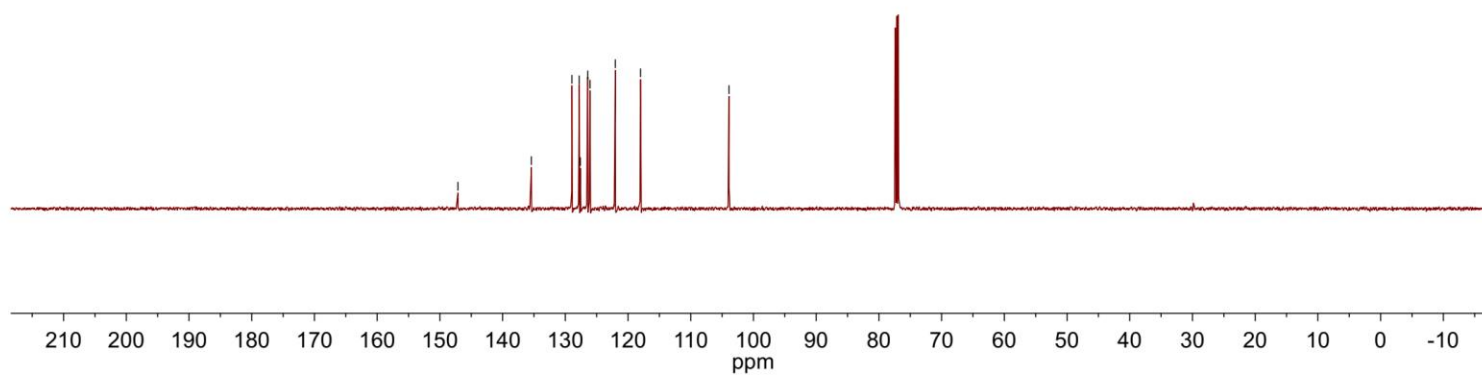

[Go back to table of contents](#)

***N*-(Methyl-*d*<sub>3</sub>)naphthalen-2-amine (91)**

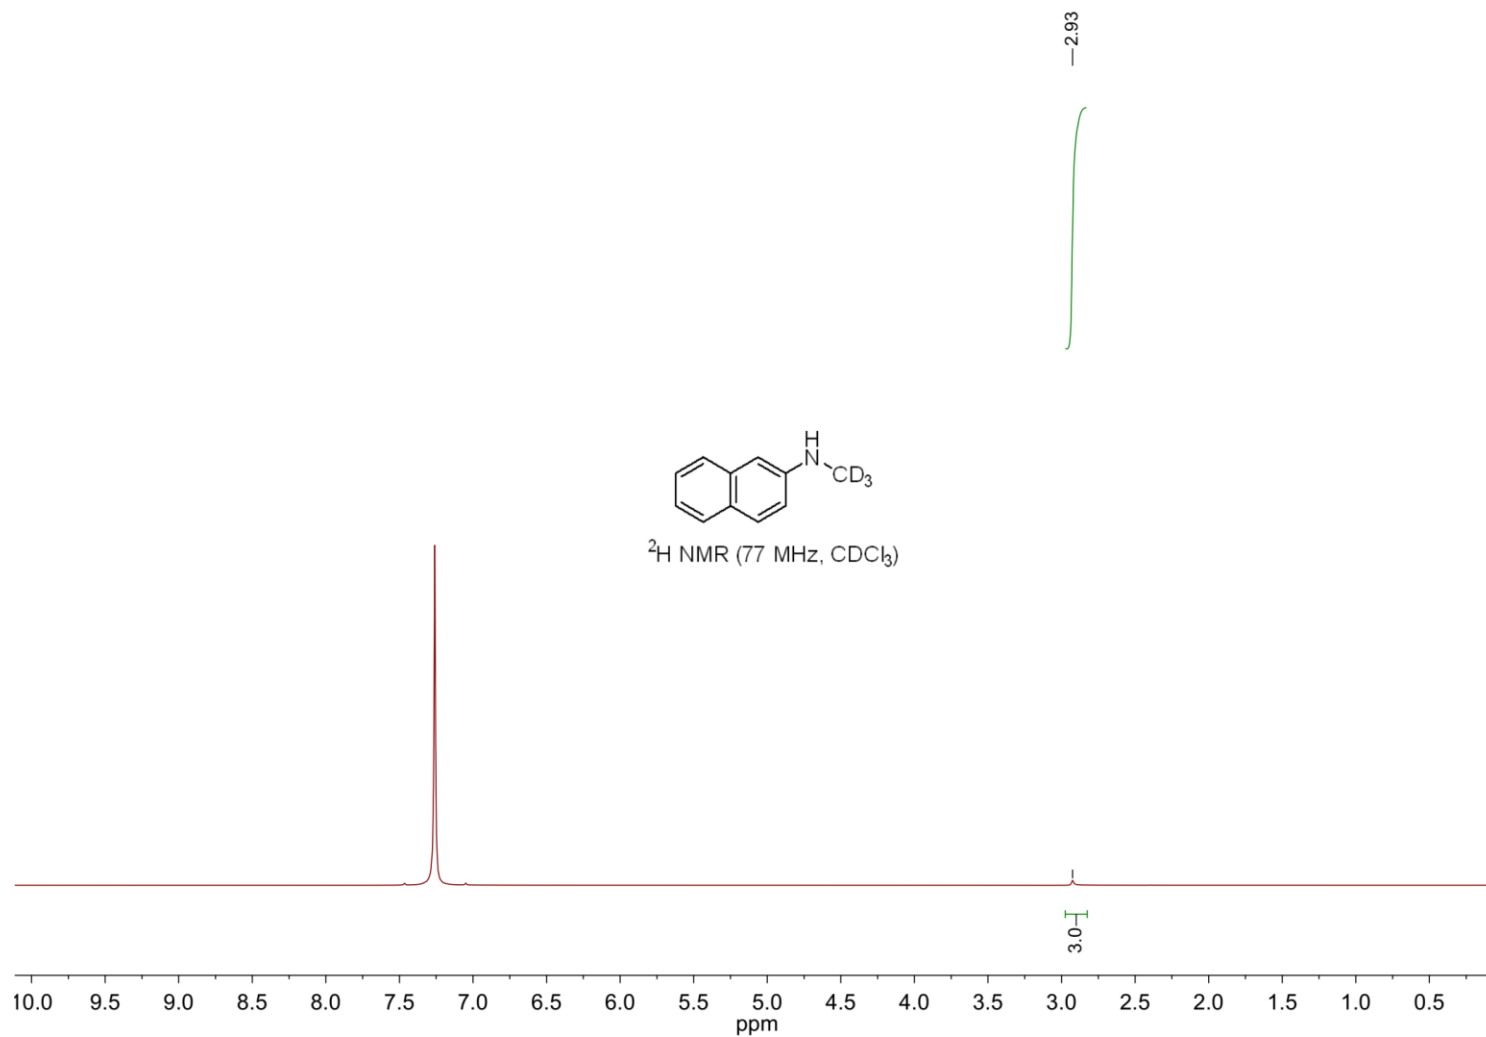

5-Bromo-N-(methyl-*d*<sub>3</sub>)naphthalen-1-amine (92)

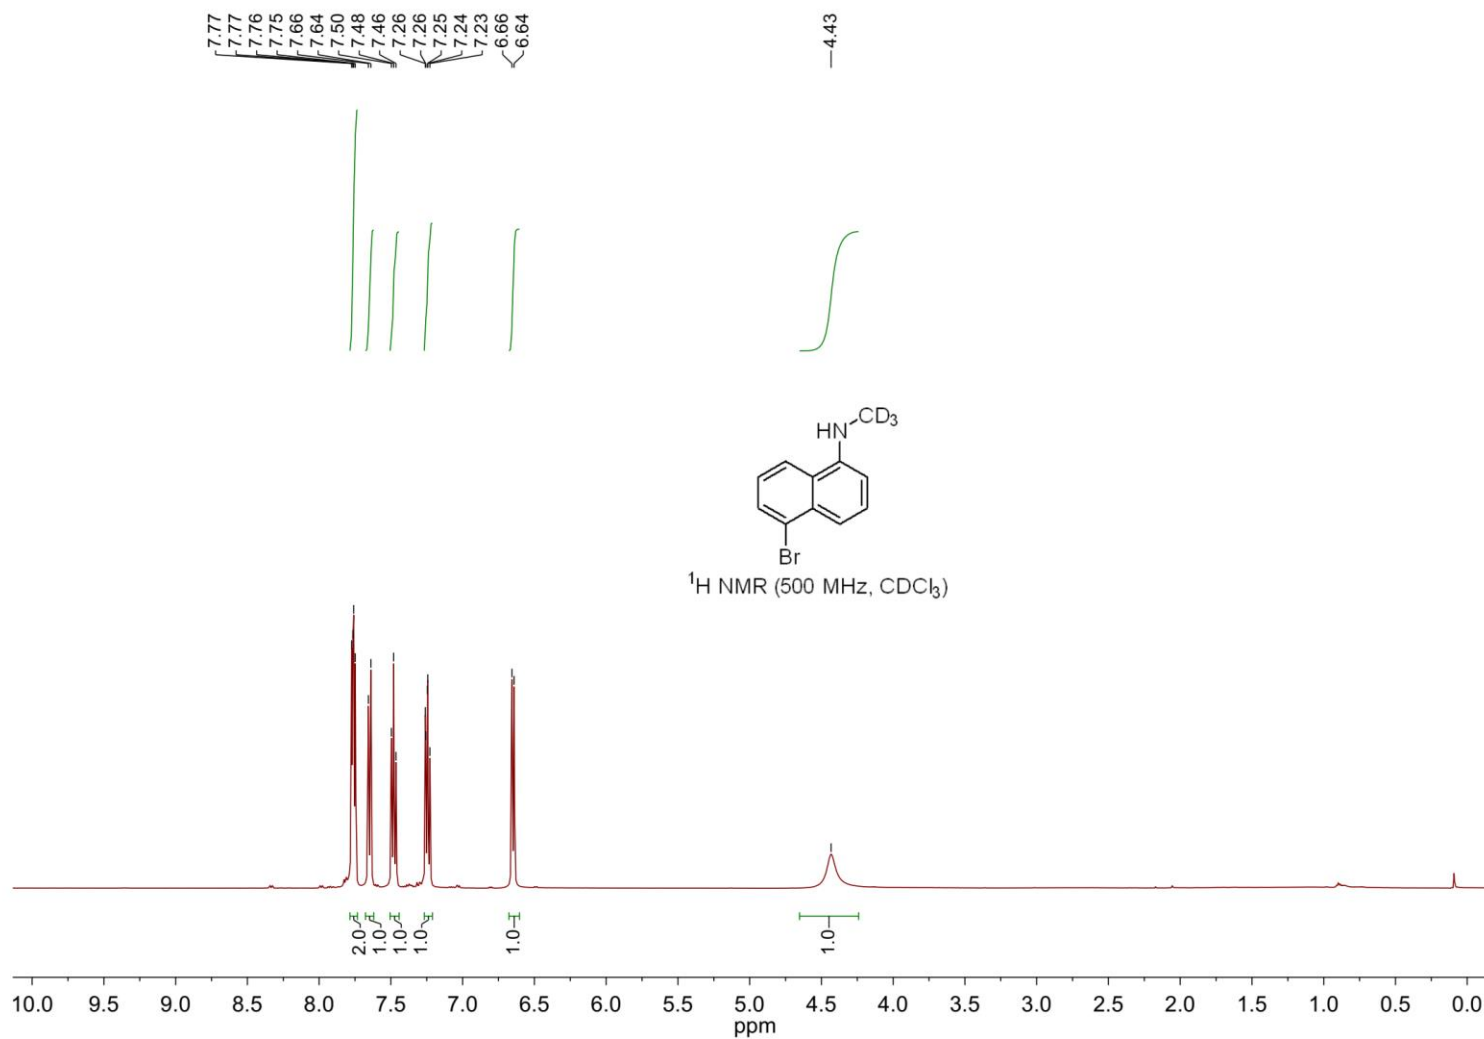

5-Bromo-N-(methyl-*d*<sub>3</sub>)naphthalen-1-amine (92)

—144.9  
132.9  
130.1  
128.3  
124.8  
124.7  
123.9  
119.9  
116.4  
—104.8

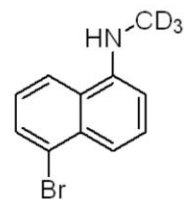

<sup>13</sup>C NMR (125 MHz, CDCl<sub>3</sub>)

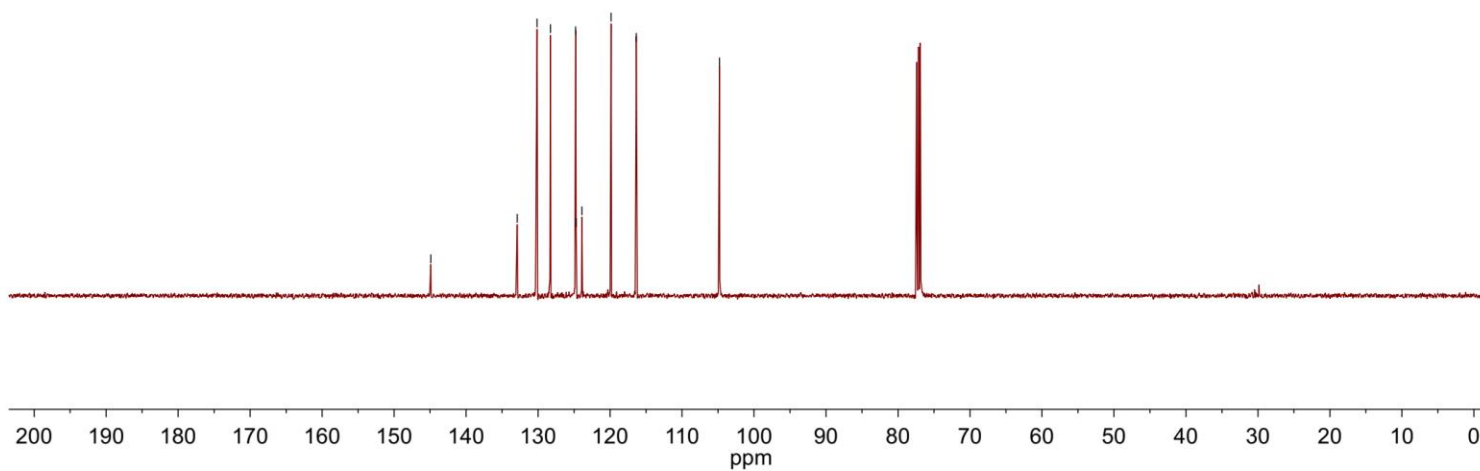

5-Bromo-N-(methyl-*d*<sub>3</sub>)naphthalen-1-amine (92)

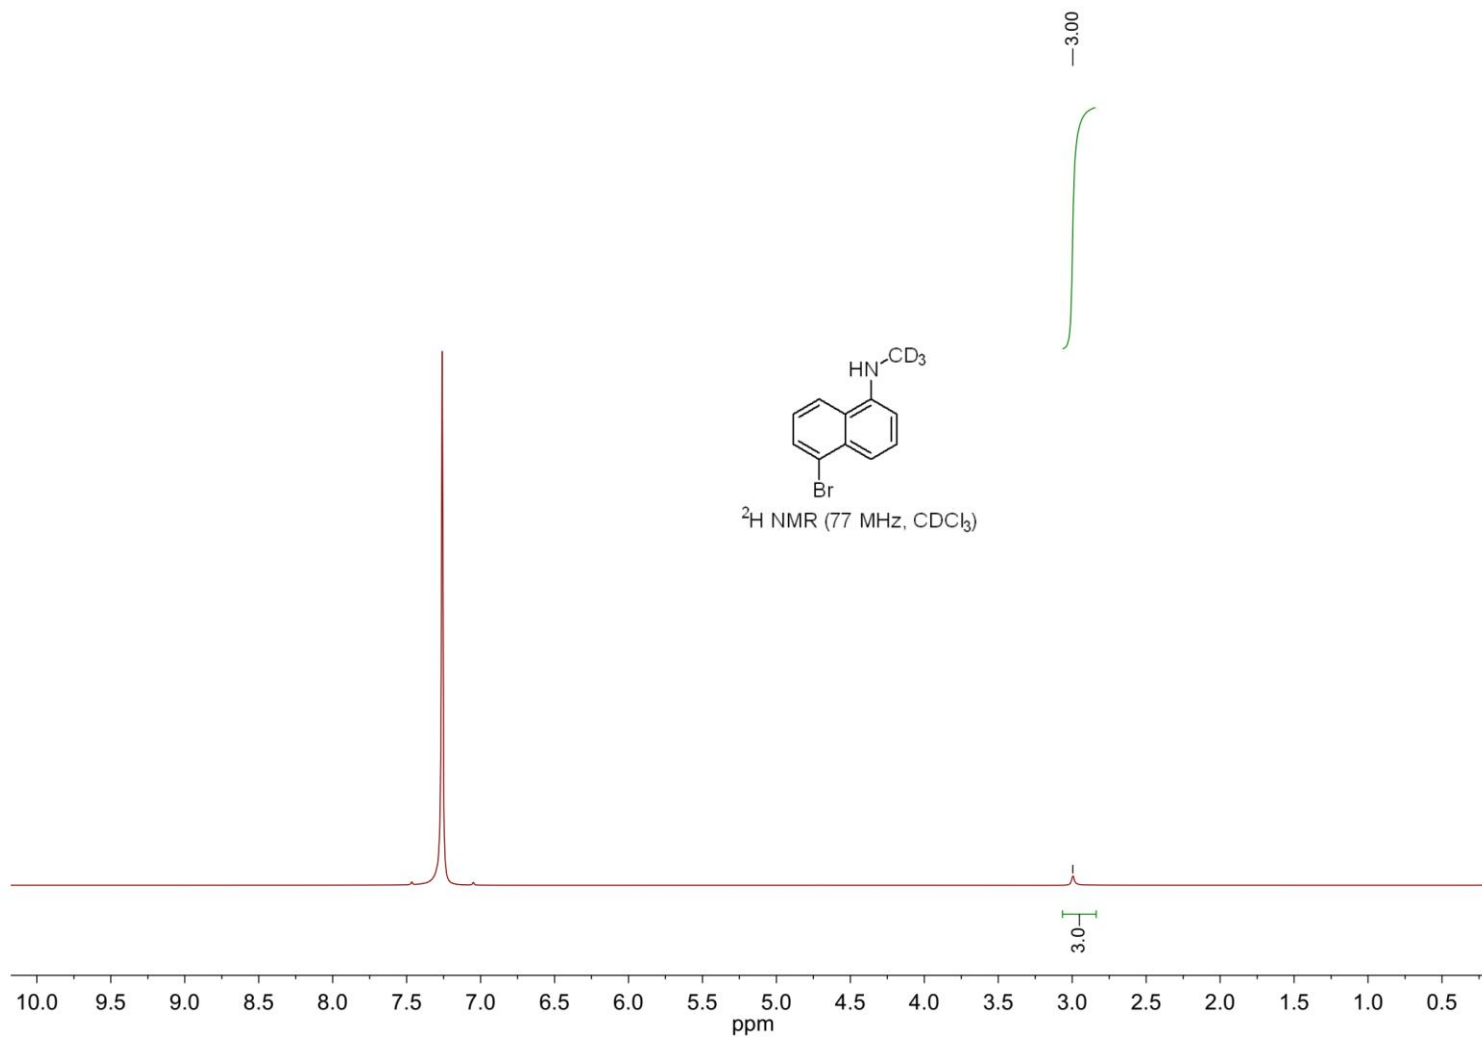

### Methyl 2-((methyl-*d*<sub>3</sub>)amino)thiophene-3-carboxylate (93)

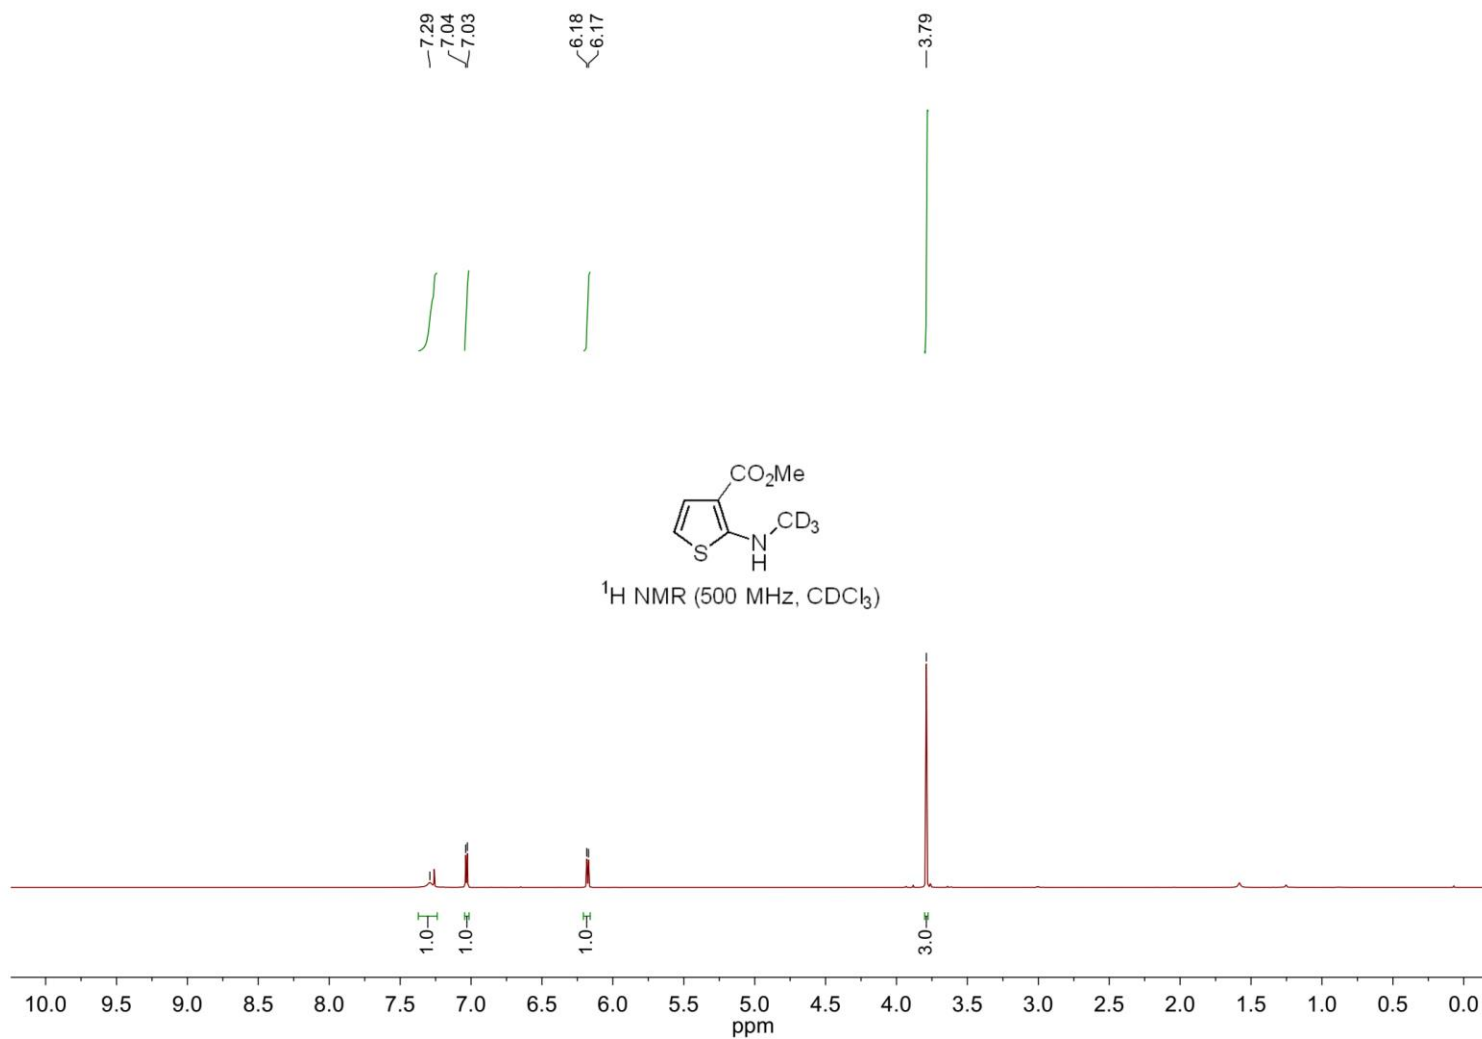

### Methyl 2-((methyl-*d*<sub>3</sub>)amino)thiophene-3-carboxylate (93)

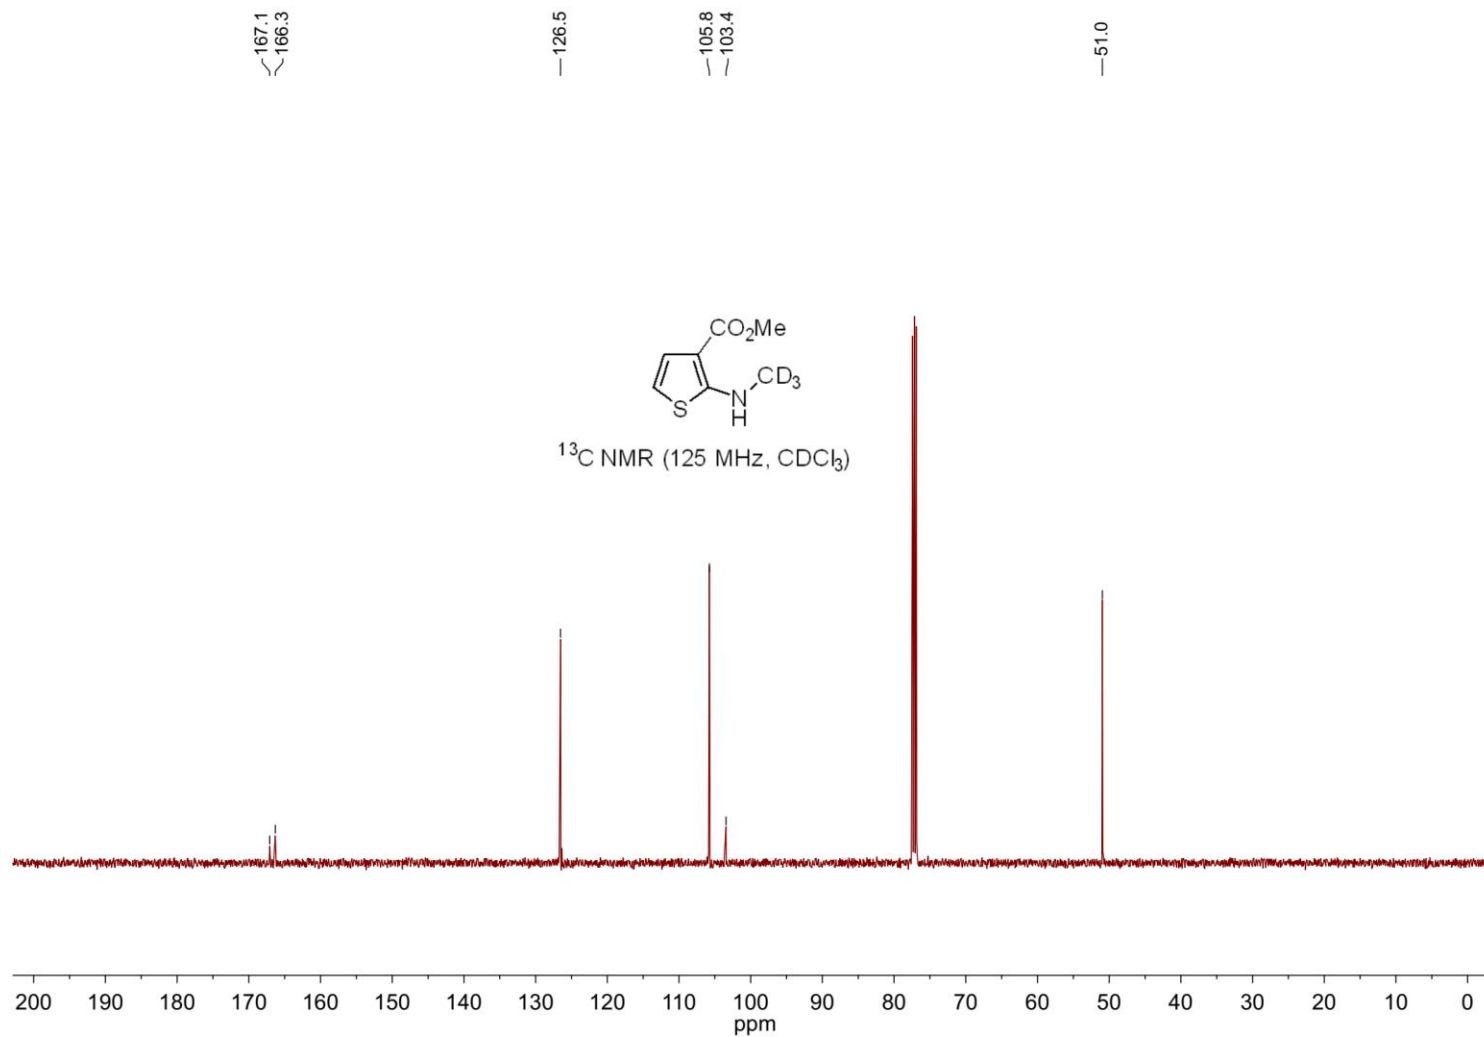



### Methyl 2-((methyl-*d*<sub>3</sub>)amino)thiophene-3-carboxylate (93)

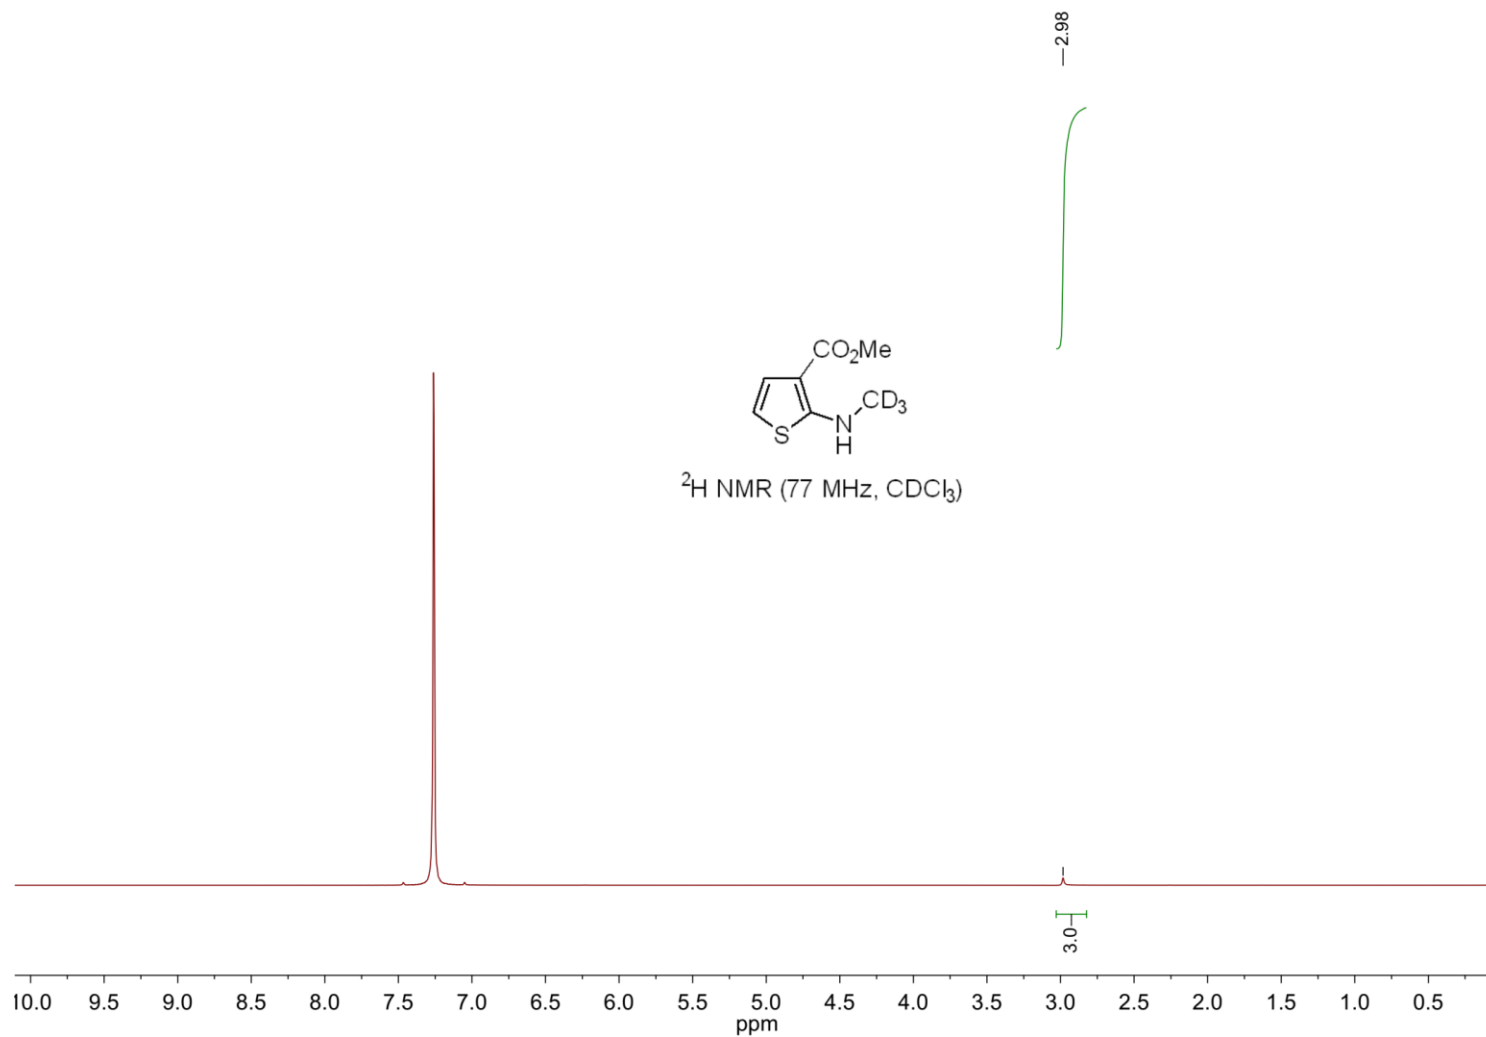

### *N*-(Methyl-*d*<sub>3</sub>)quinolin-8-amine (94)

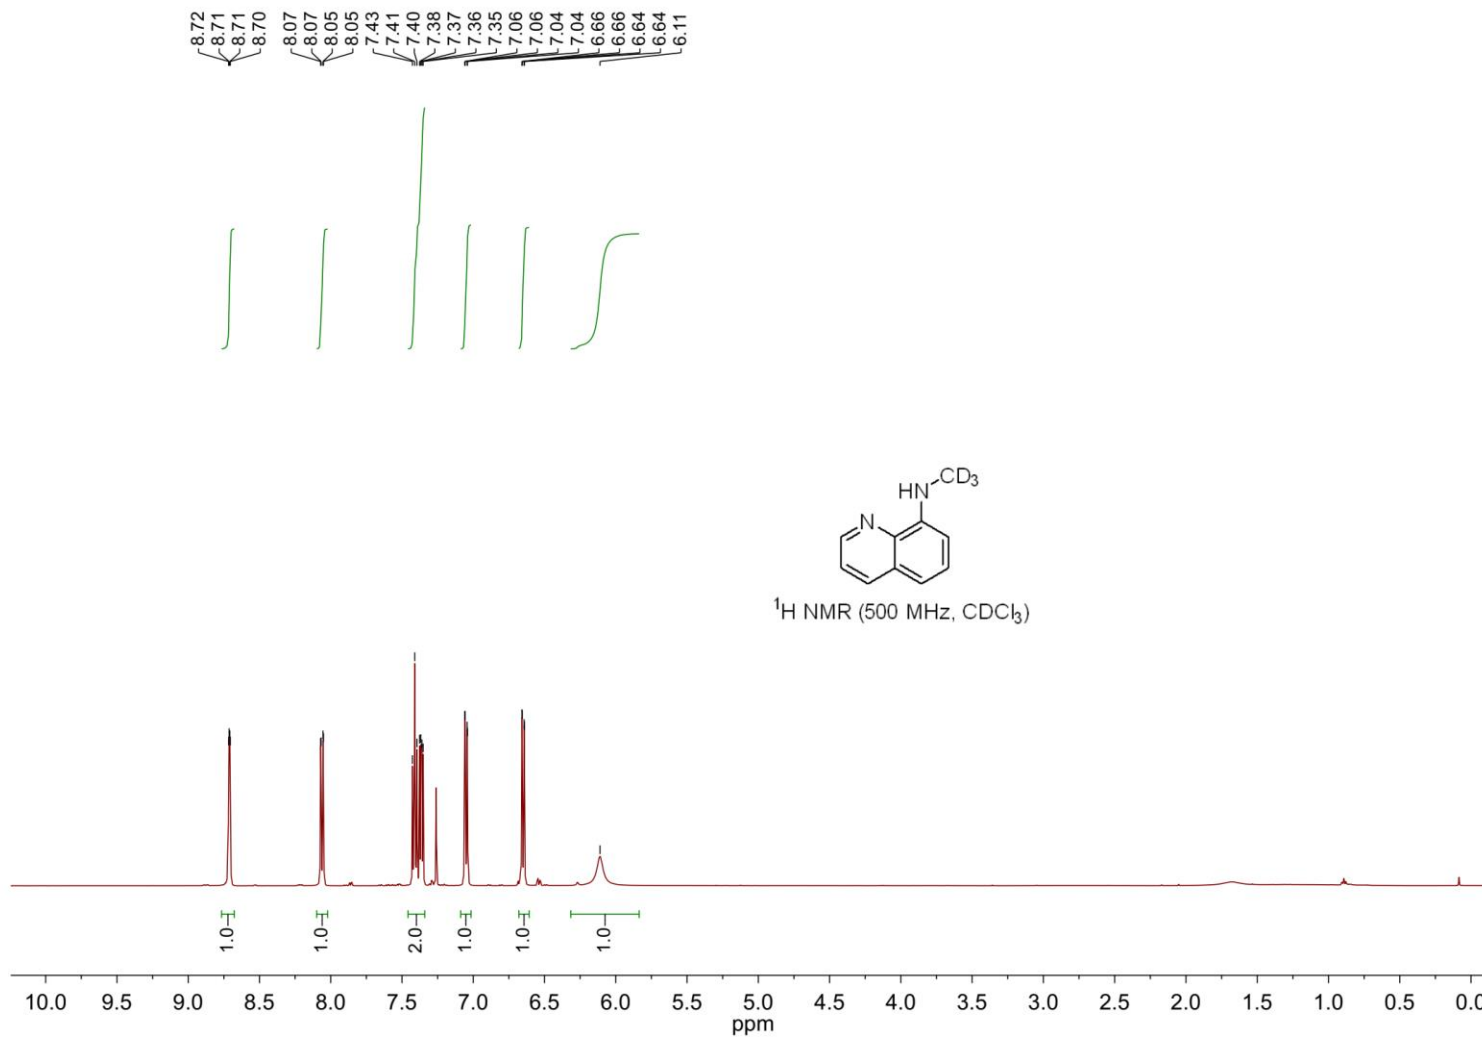

### *N*-(Methyl-*d*<sub>3</sub>)quinolin-8-amine (94)

146.9  
146.0  
138.4  
136.1  
128.7  
128.0  
121.5  
113.8  
104.3

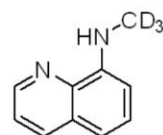

<sup>13</sup>C NMR (125 MHz, CDCl<sub>3</sub>)

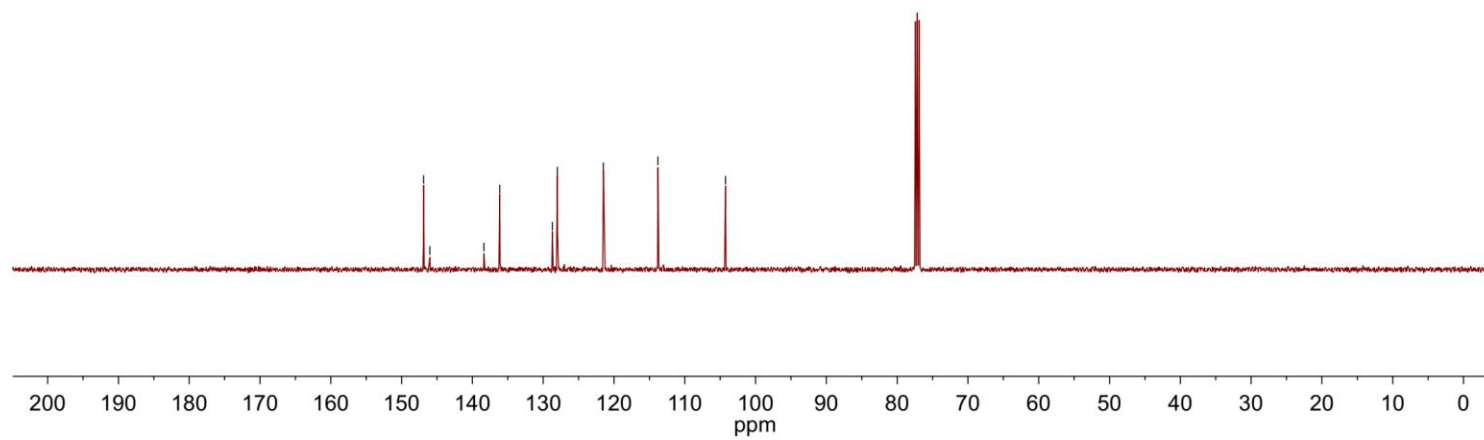

[Go back to table of contents](#)

***N*-(Methyl-*d*<sub>3</sub>)quinolin-8-amine (94)**

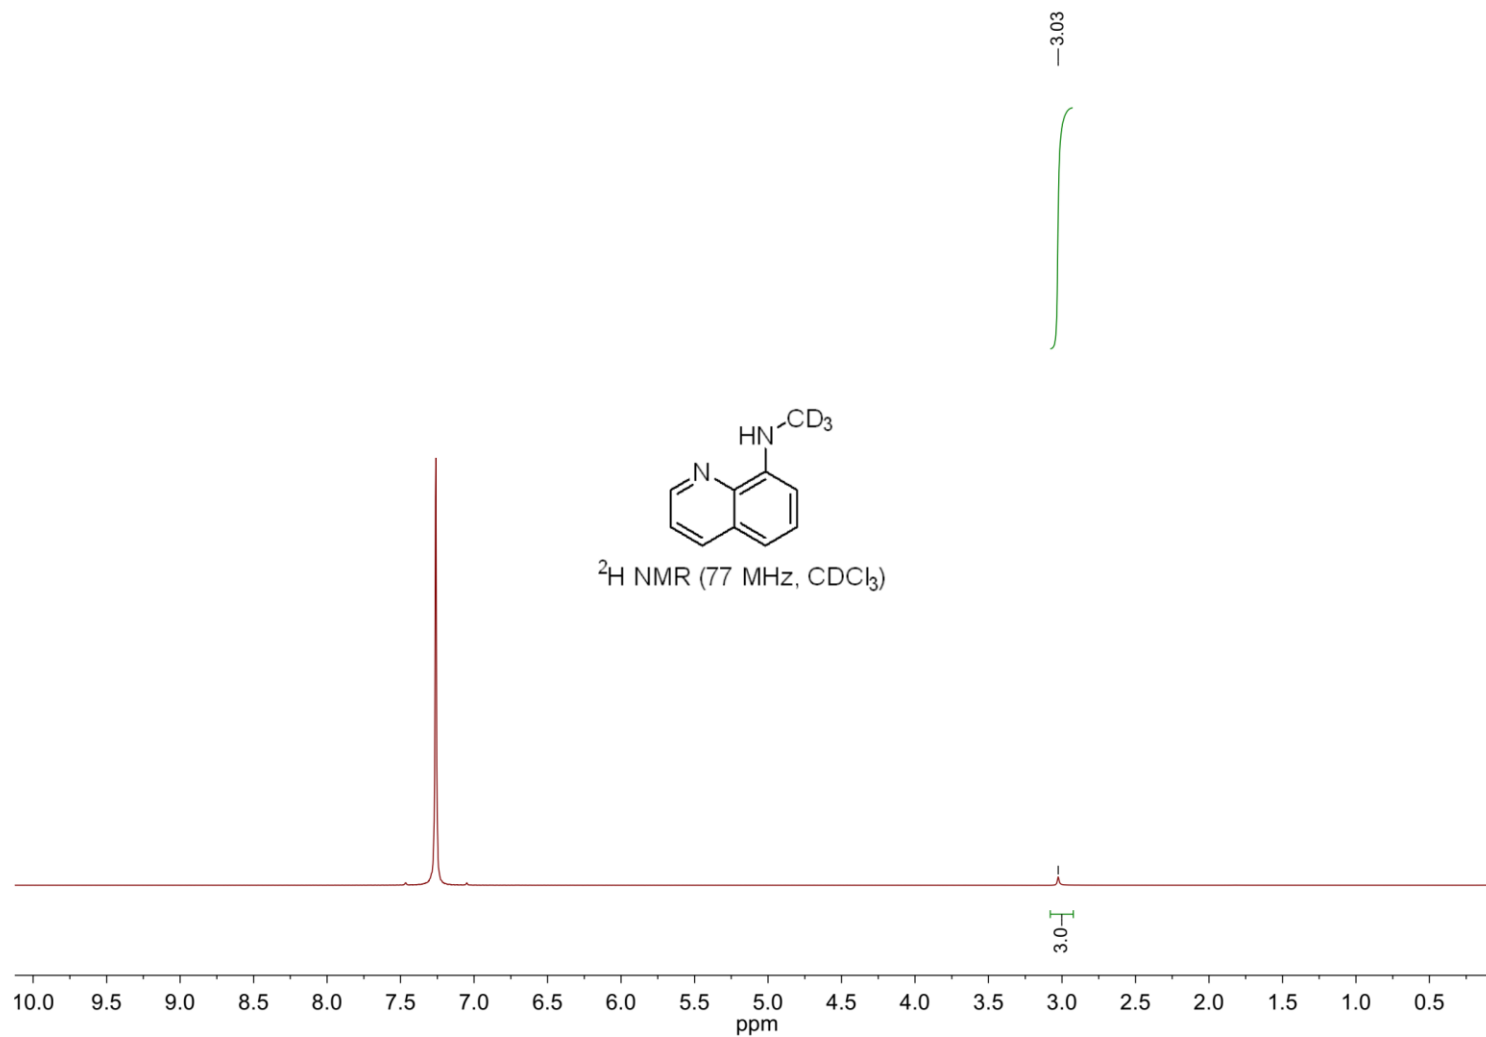

4-(Tert-butyl)-N-(4-(tert-butyl)phenyl)-N-(methyl-*d*<sub>3</sub>)aniline (95)

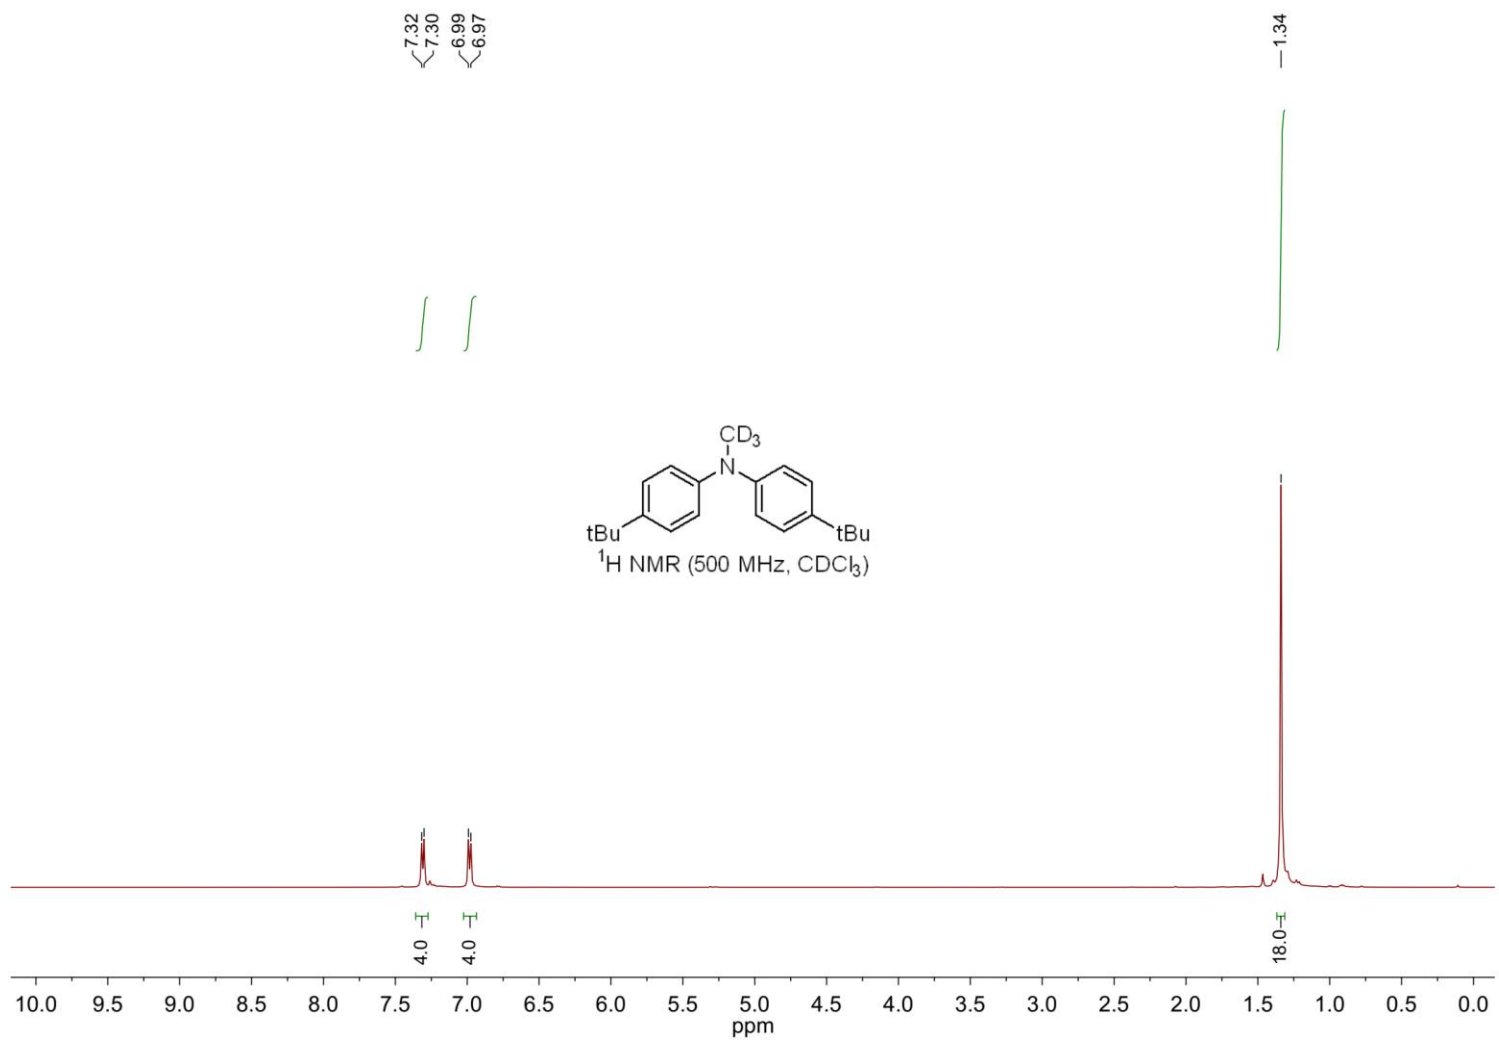

[Go back to table of contents](#)

4-(Tert-butyl)-N-(4-(tert-butyl)phenyl)-N-(methyl-*d*<sub>3</sub>)aniline (95)

—146.7  
—143.8

—126.1  
—119.9

—34.3  
—31.6

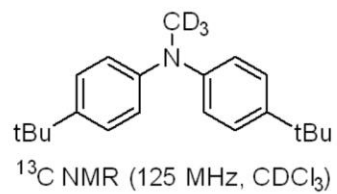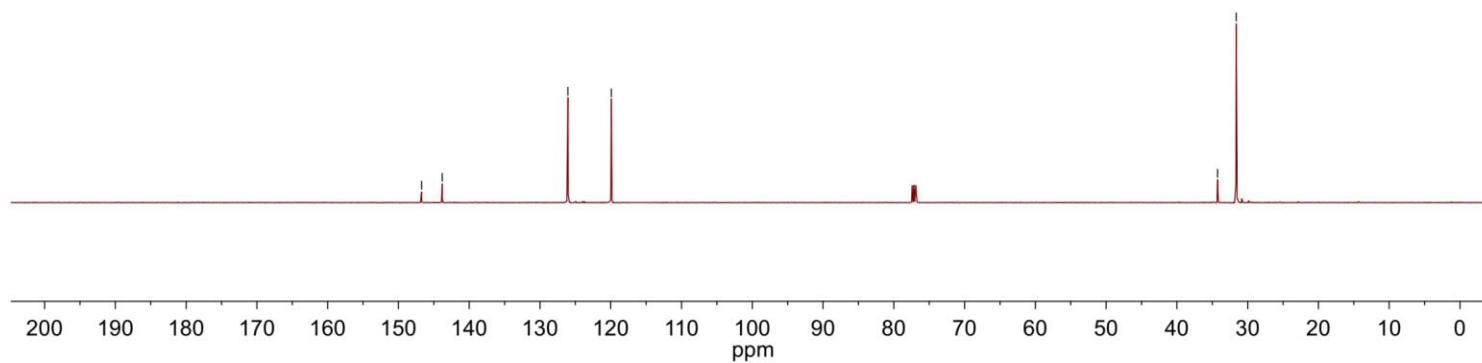

4-(Tert-butyl)-N-(4-(tert-butyl)phenyl)-N-(methyl-*d*<sub>3</sub>)aniline (95)

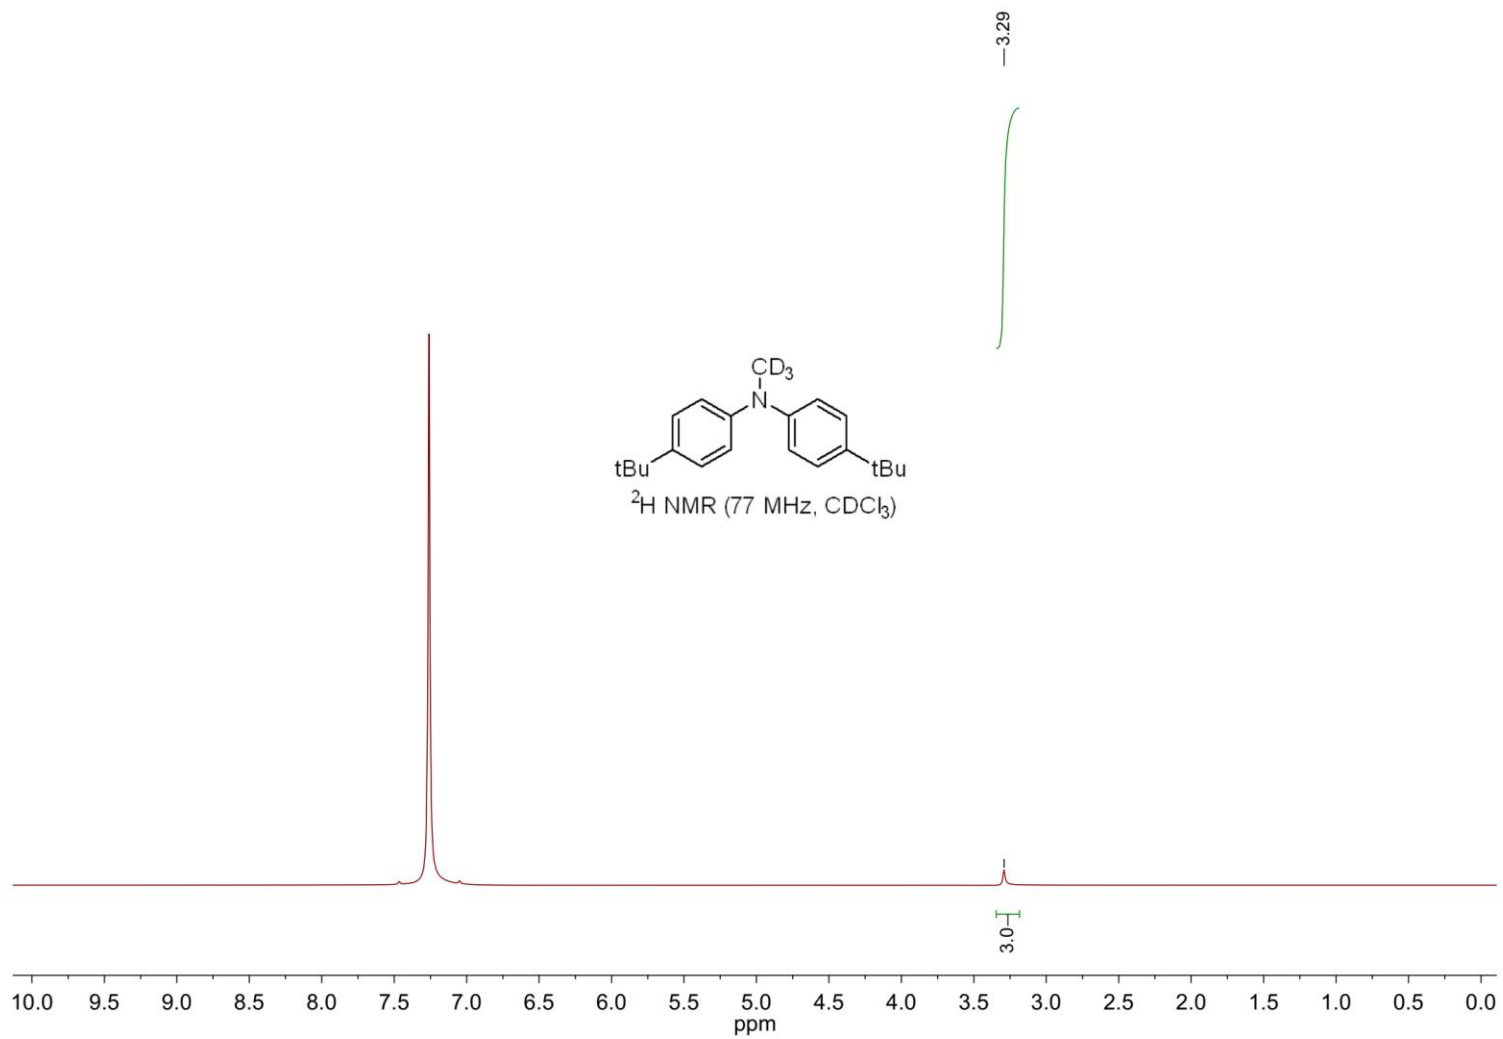

### 4-Methyl-N-(methyl-*d*<sub>3</sub>)-N-(*p*-tolyl)aniline (96)

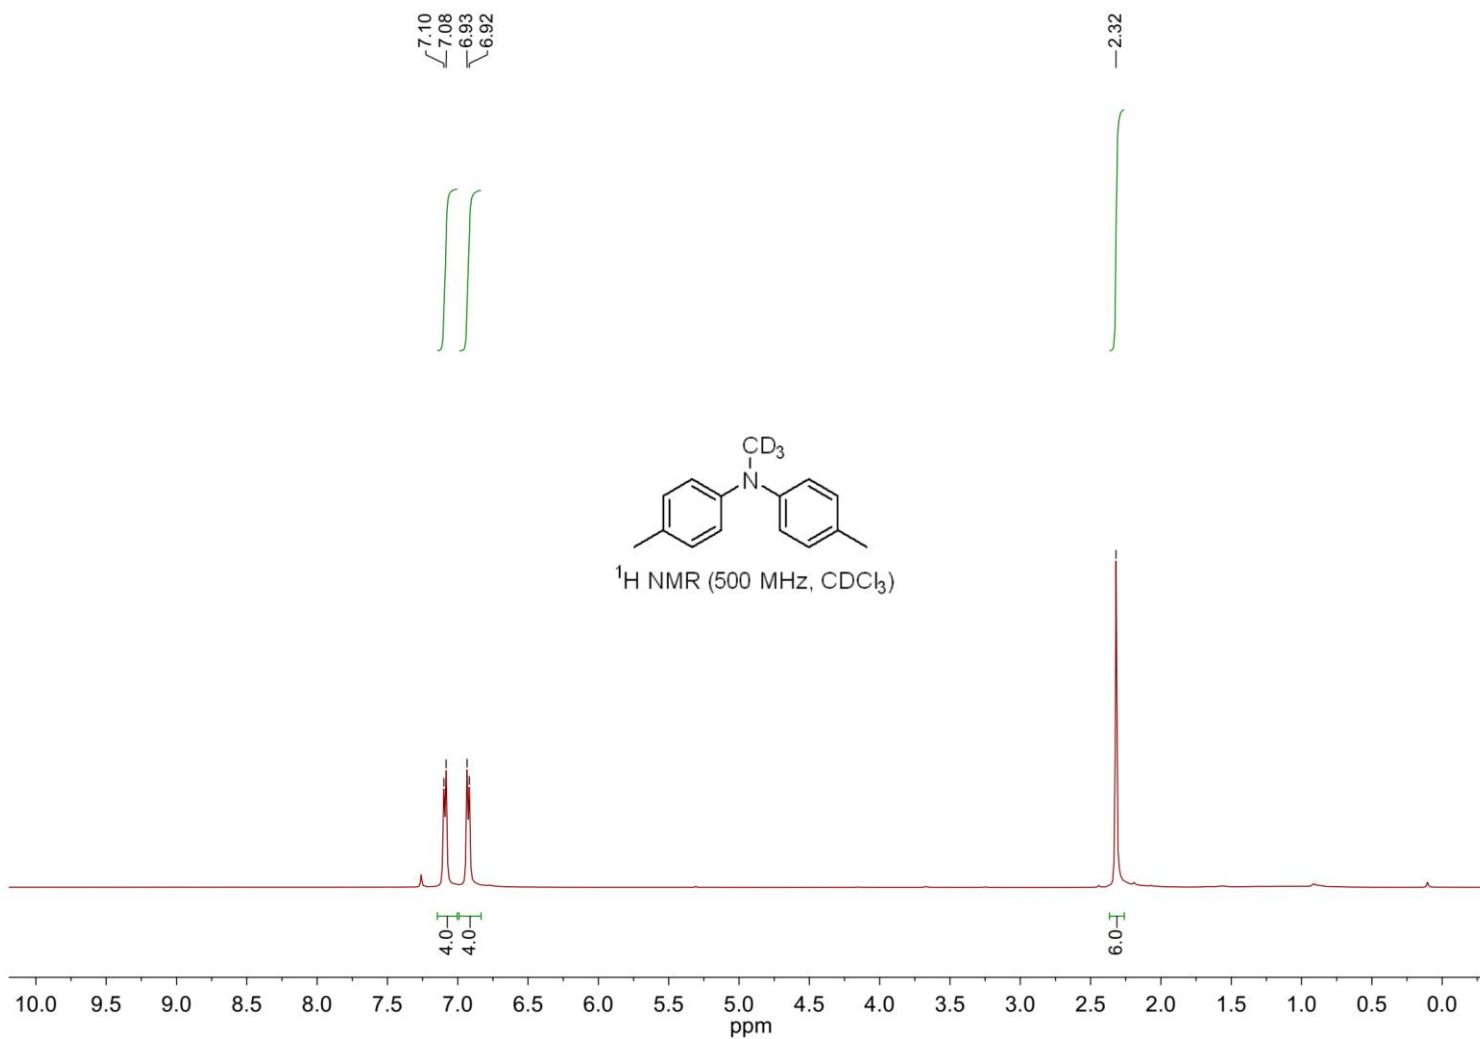

[Go back to table of contents](#)



### 4-Methyl-N-(methyl-*d*<sub>3</sub>)-N-(*p*-tolyl)aniline (96)

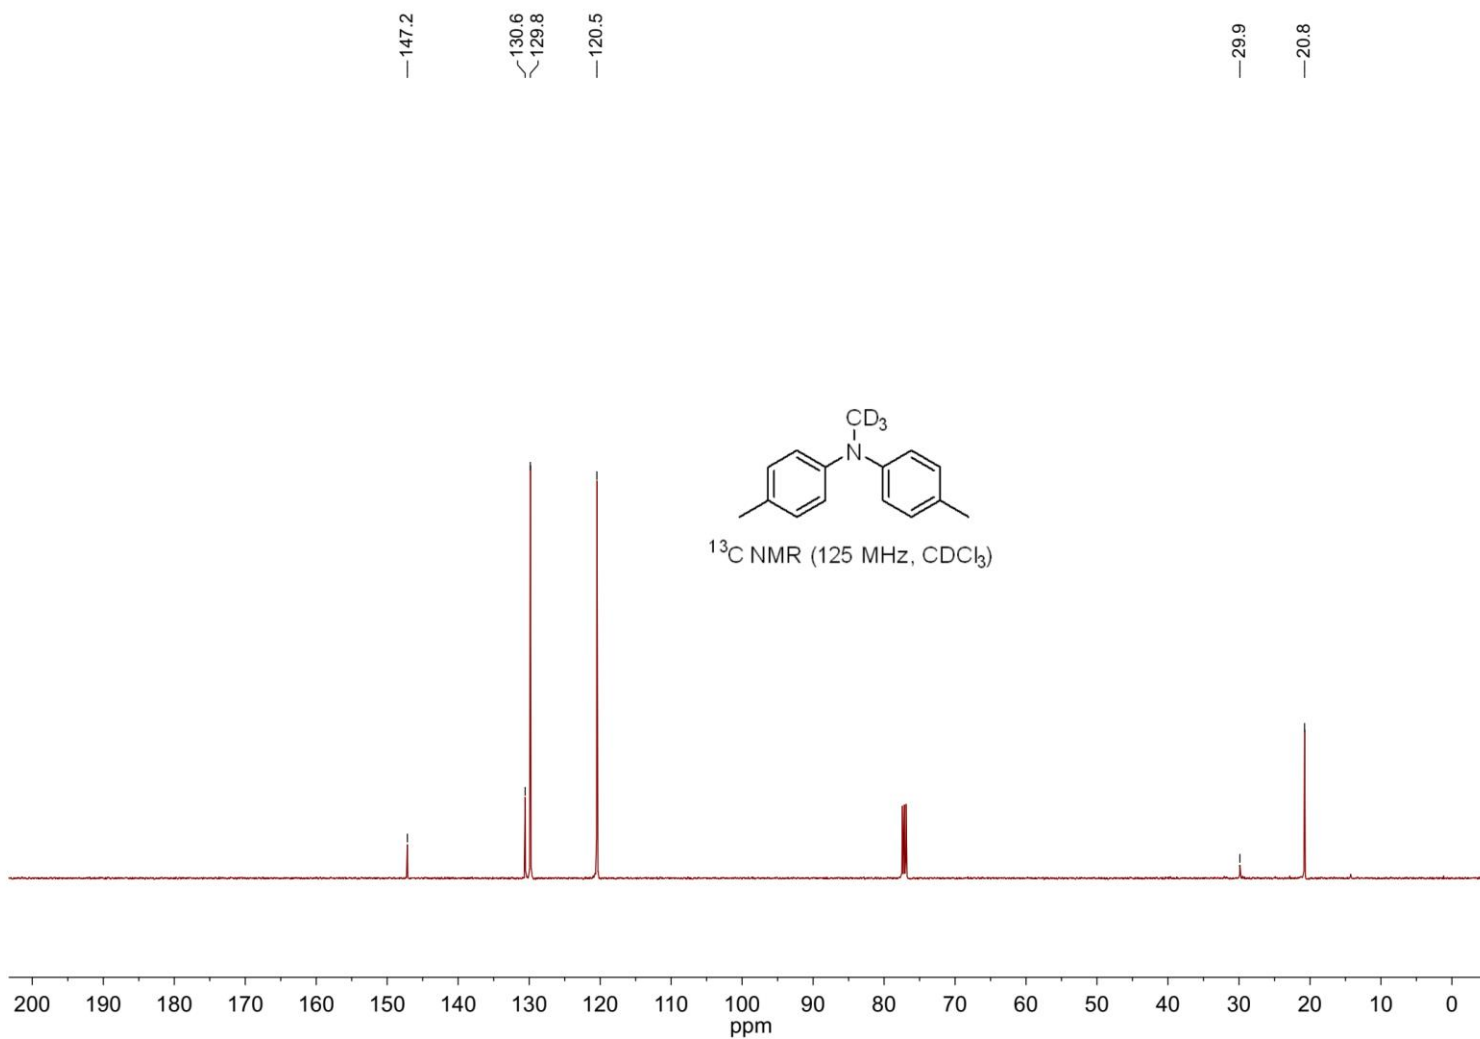

[Go back to table of contents](#)

4-Methyl-N-(methyl-*d*<sub>3</sub>)-N-(*p*-tolyl)aniline (96)

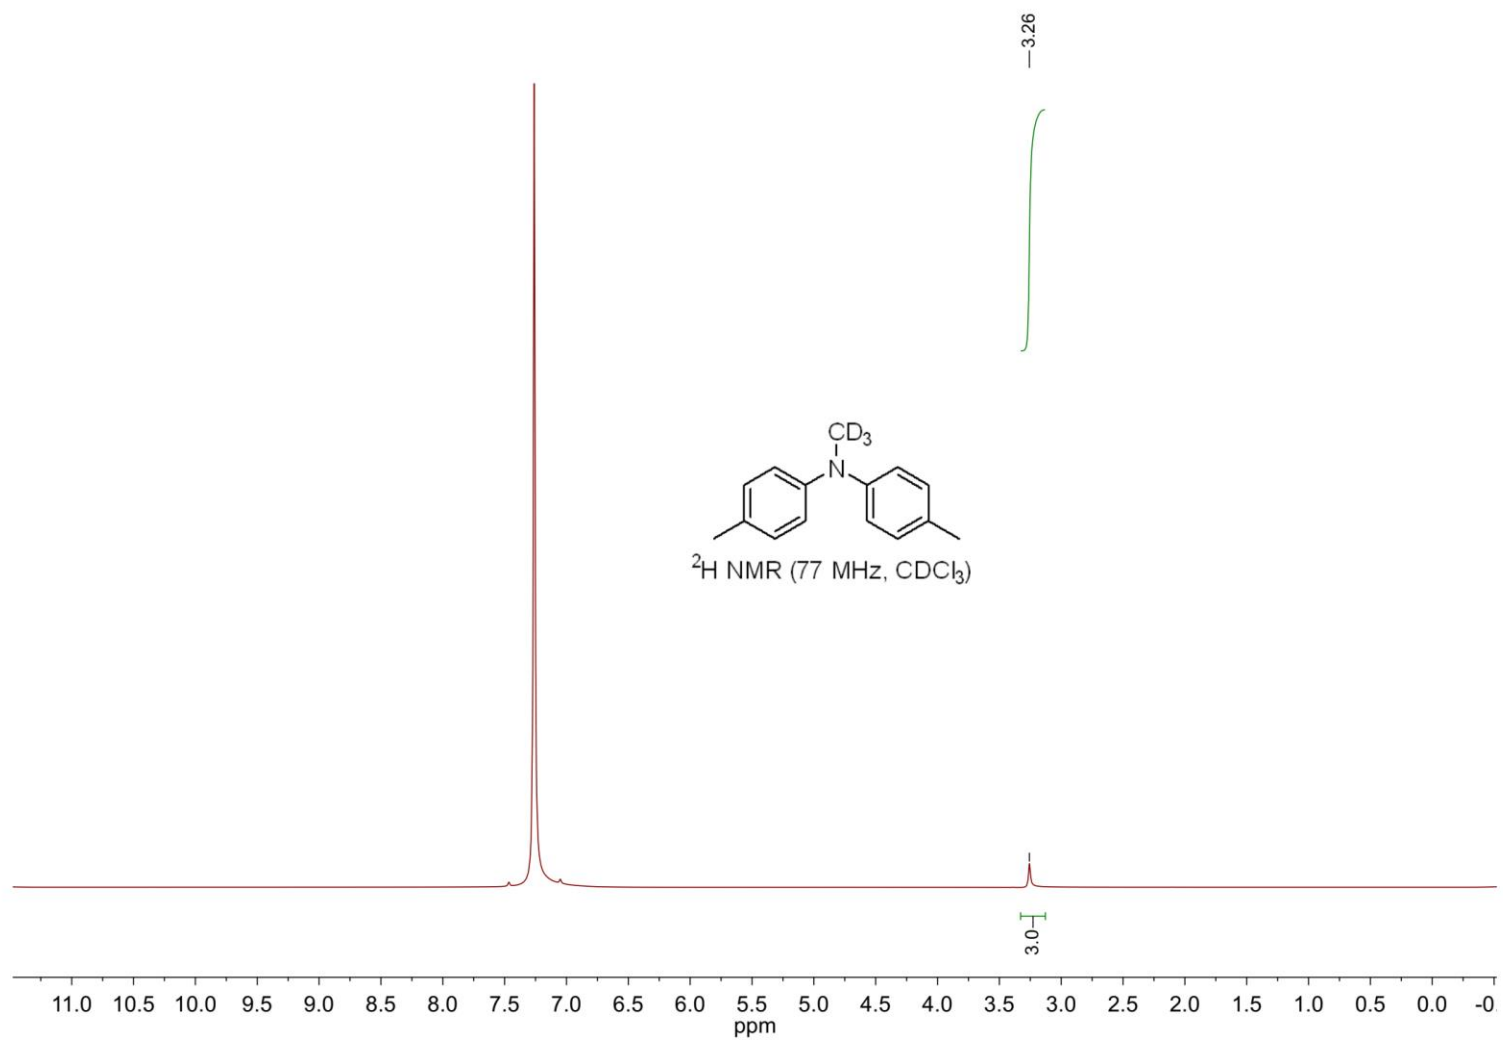

### 3-Ethyl-3-(4-((methyl-*d*<sub>3</sub>)amino)phenyl)piperidine-2,6-dione (97)

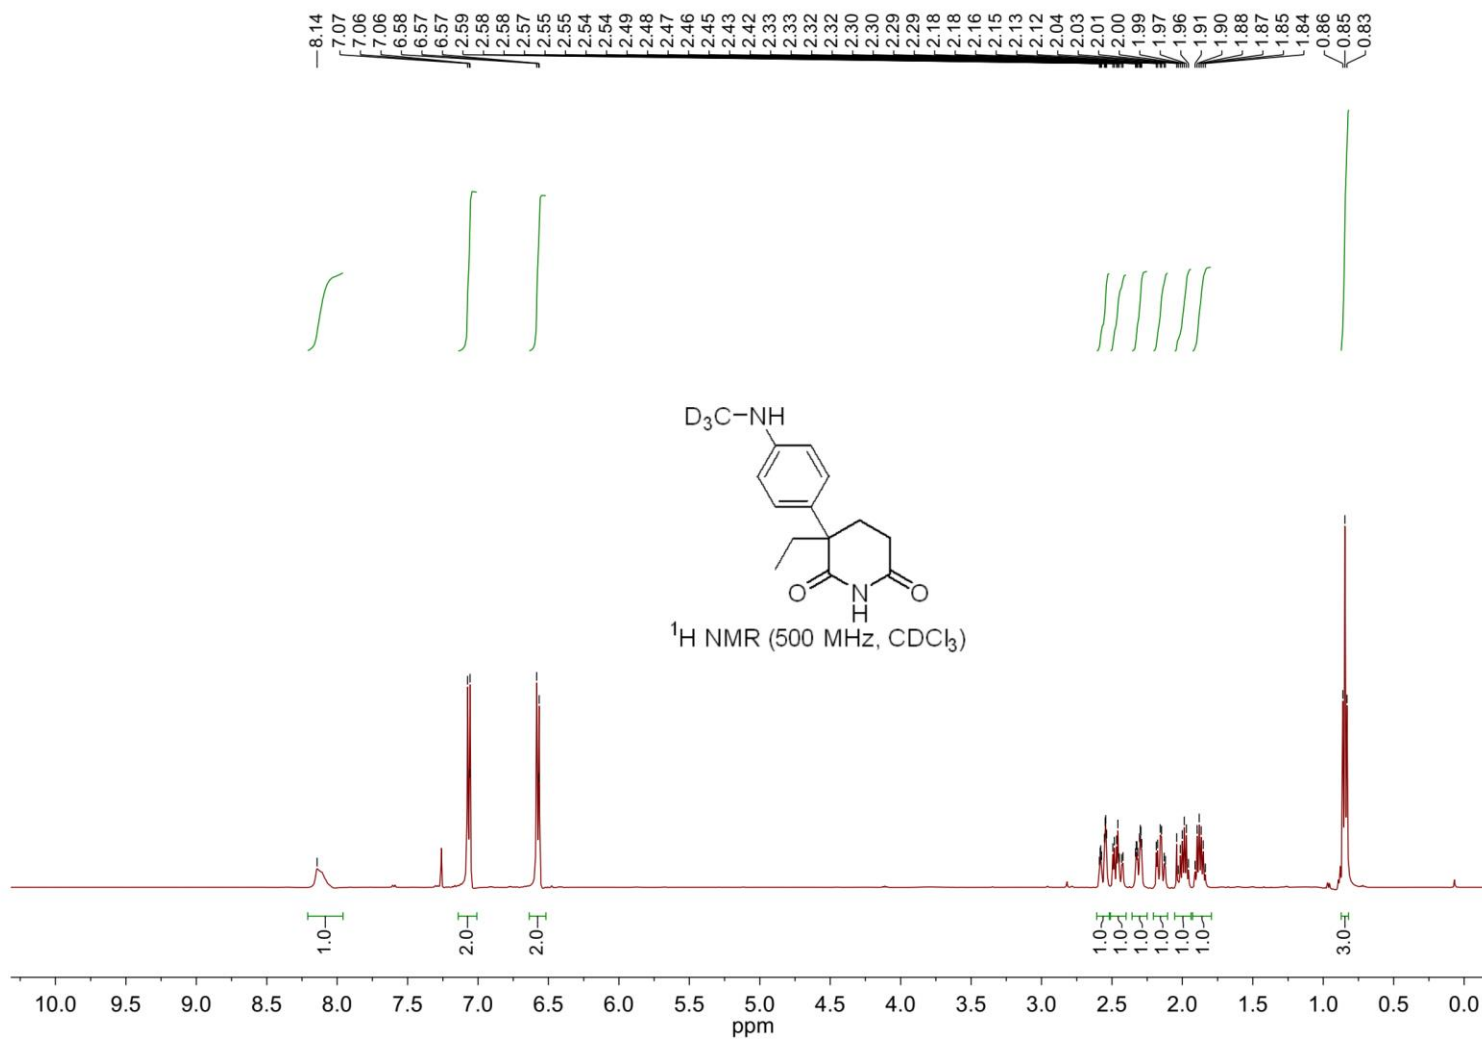

### 3-Ethyl-3-(4-((methyl-*d*<sub>3</sub>)amino)phenyl)piperidine-2,6-dione (97)

—175.9  
—172.9  
  
—148.6  
  
—127.1  
—126.7  
  
—112.7  
  
—50.3  
  
—33.1  
—29.5  
—27.1  
  
—9.1

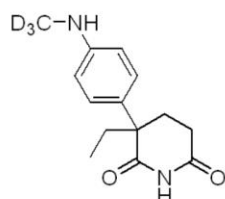

<sup>13</sup>C NMR (125 MHz, CDCl<sub>3</sub>)

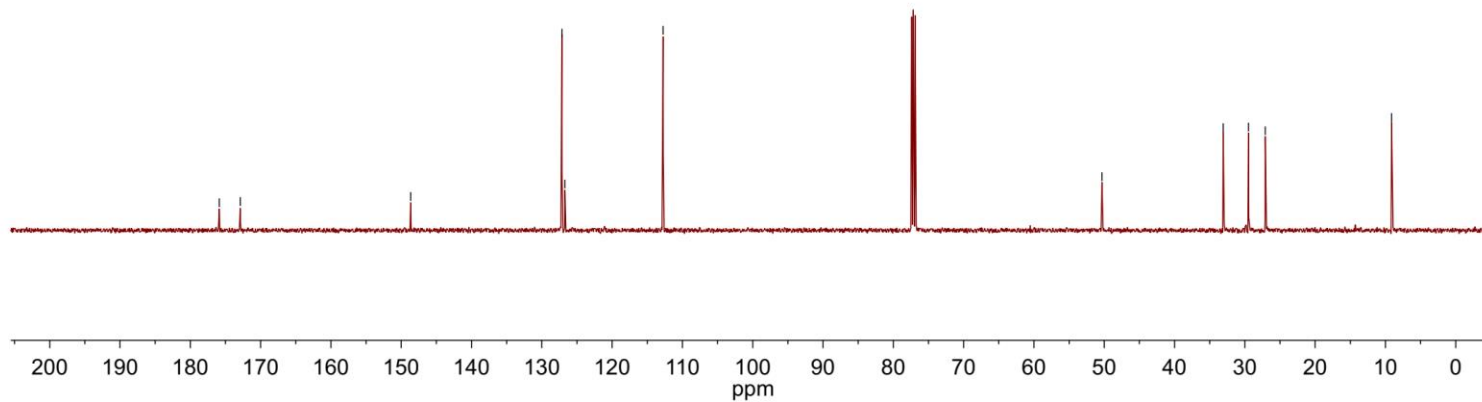

[Go back to table of contents](#)

3-Ethyl-3-(4-((methyl-*d*<sub>3</sub>)amino)phenyl)piperidine-2,6-dione (97)

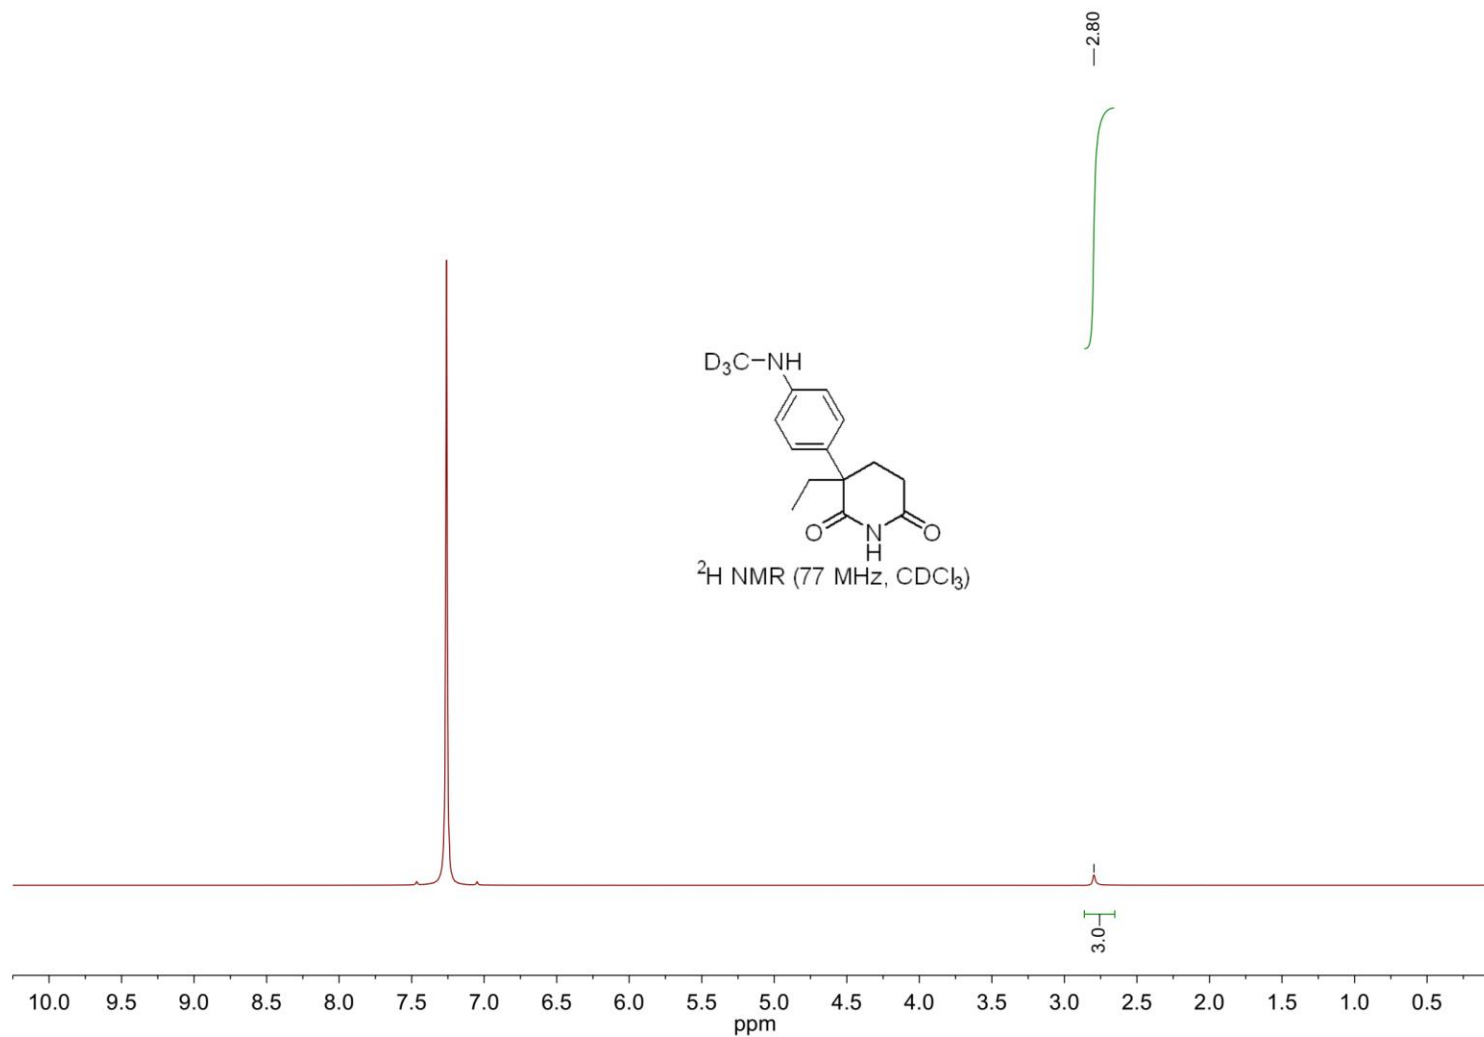

### 3,4-Dimethyl-*N,N*-bis(methyl-*d*<sub>3</sub>)aniline (98)

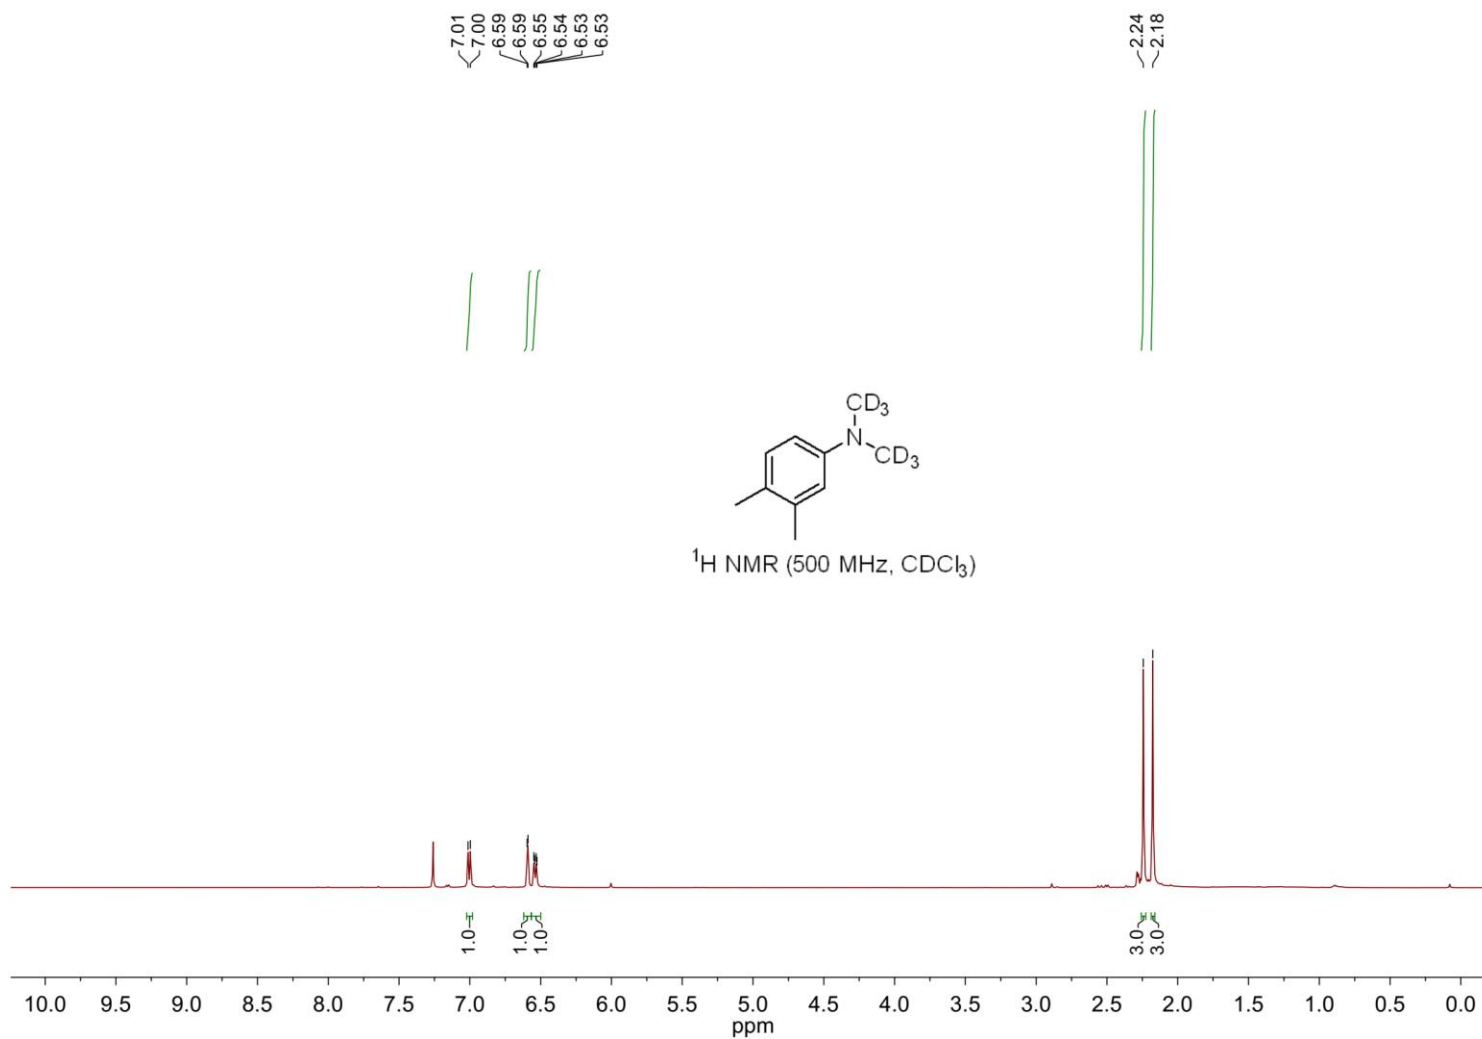

[Go back to table of contents](#)

### 3,4-Dimethyl-*N,N*-bis(methyl-*d*<sub>3</sub>)aniline (98)

—149.5  
—137.1  
—130.3  
—125.1  
—115.0  
—110.8

—20.5  
—18.7

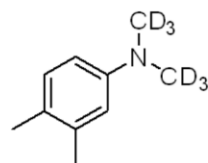

<sup>13</sup>C NMR (125 MHz, CDCl<sub>3</sub>)

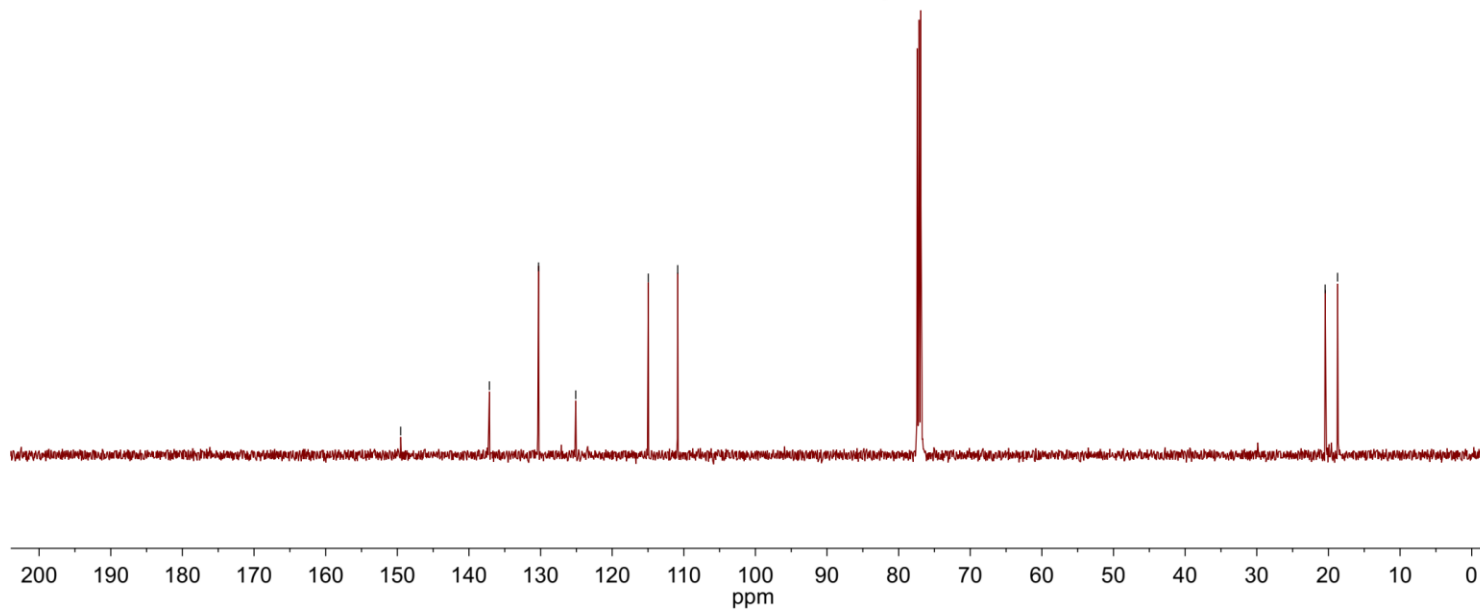

[Go back to table of contents](#)

### 3,4-Dimethyl-N,N-bis(methyl-*d*<sub>3</sub>)aniline (98)

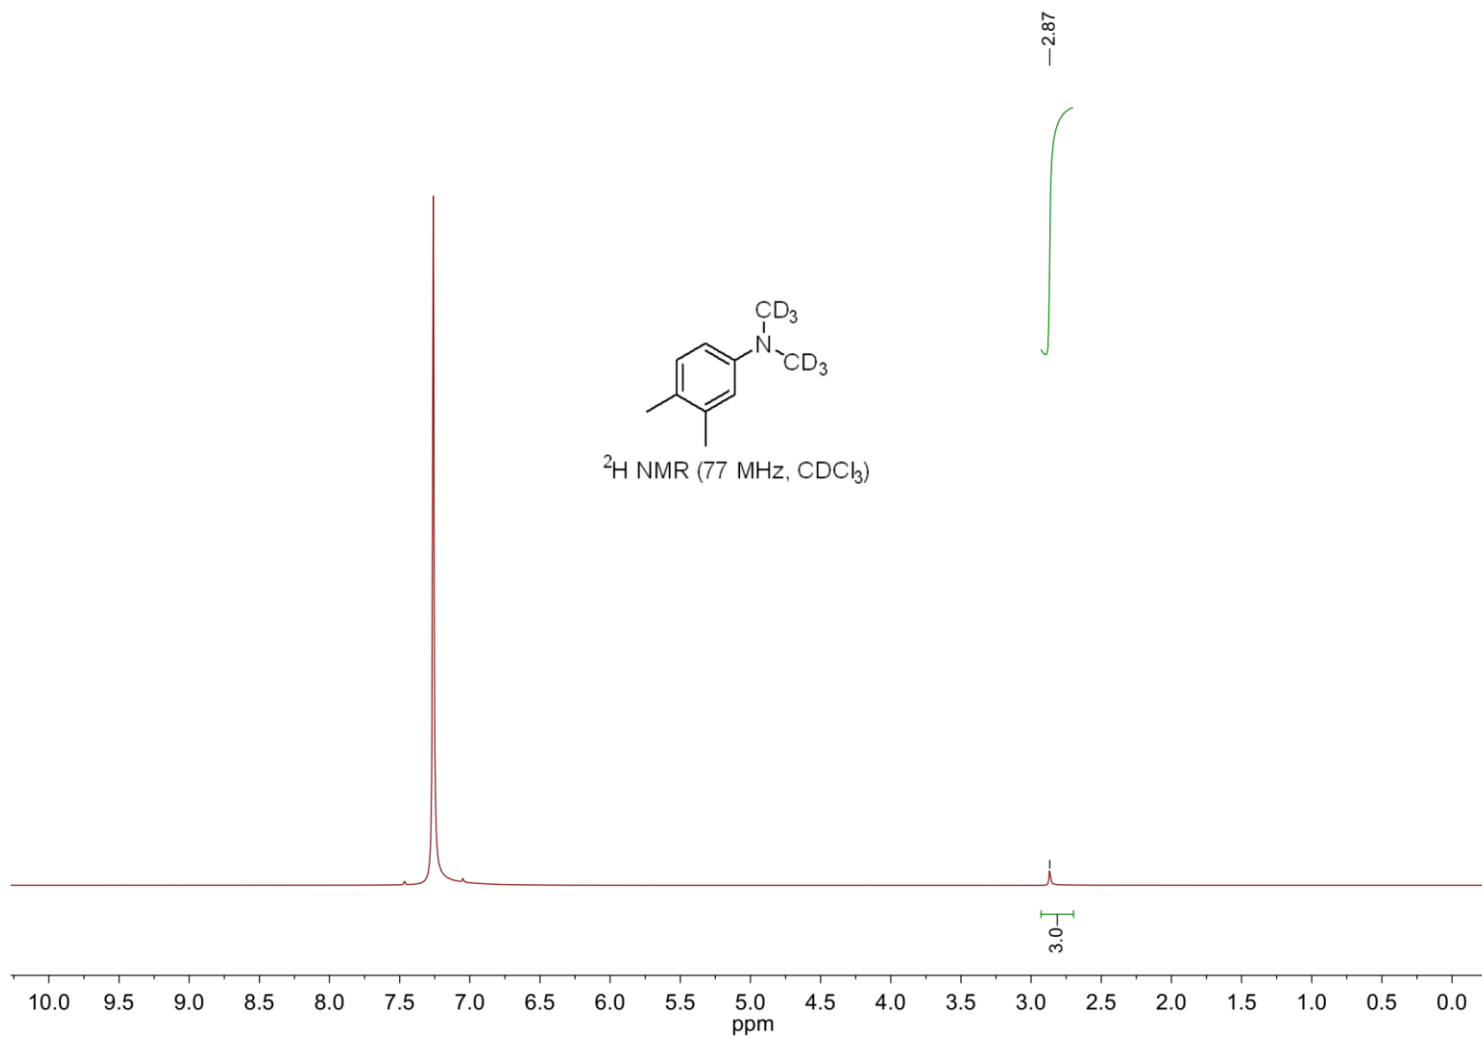

[Go back to table of contents](#)



### 1-(3-(trifluoromethyl)phenyl)pyrrolidine (100)

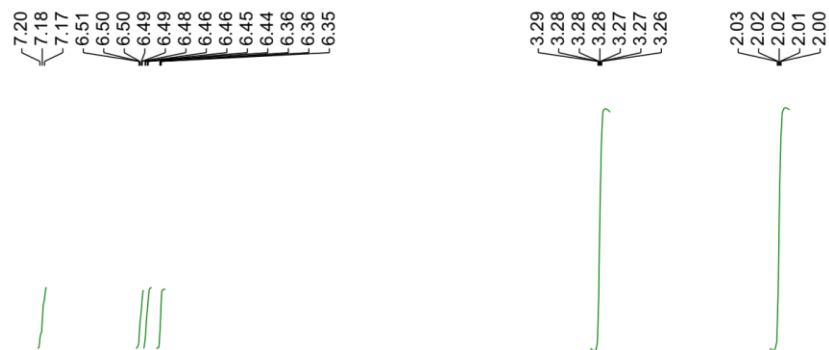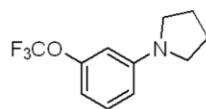

<sup>1</sup>H NMR (500 MHz, CDCl<sub>3</sub>)

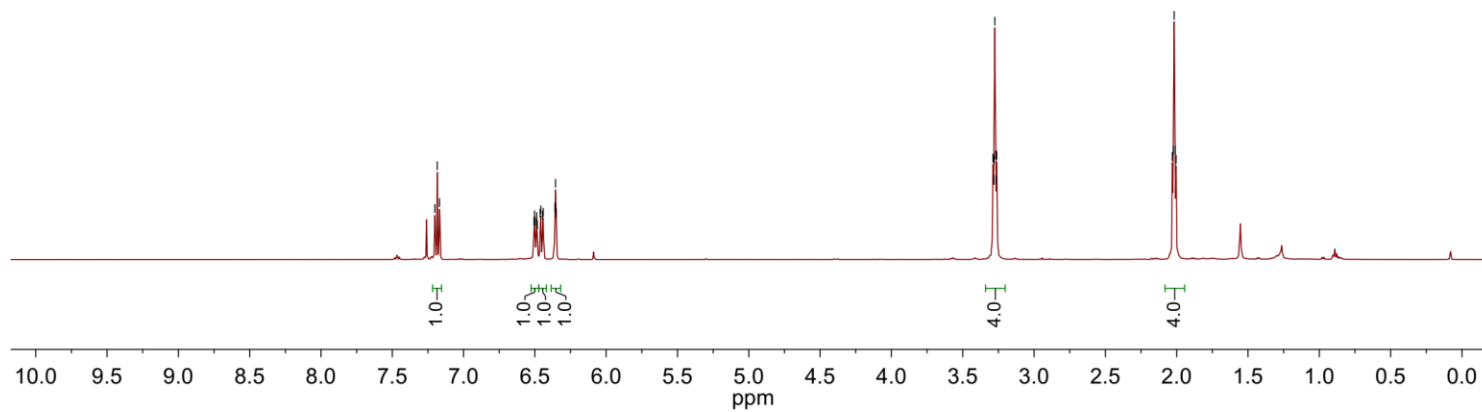

[Go back to table of contents](#)

### 1-(3-(trifluoromethyl)phenyl)pyrrolidine (100)

150.6  
149.2  
130.1  
121.8  
119.7  
110.0  
107.2  
104.1  
47.8  
25.6

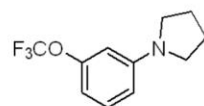

$^{13}\text{C}$  NMR (125 MHz,  $\text{CDCl}_3$ )

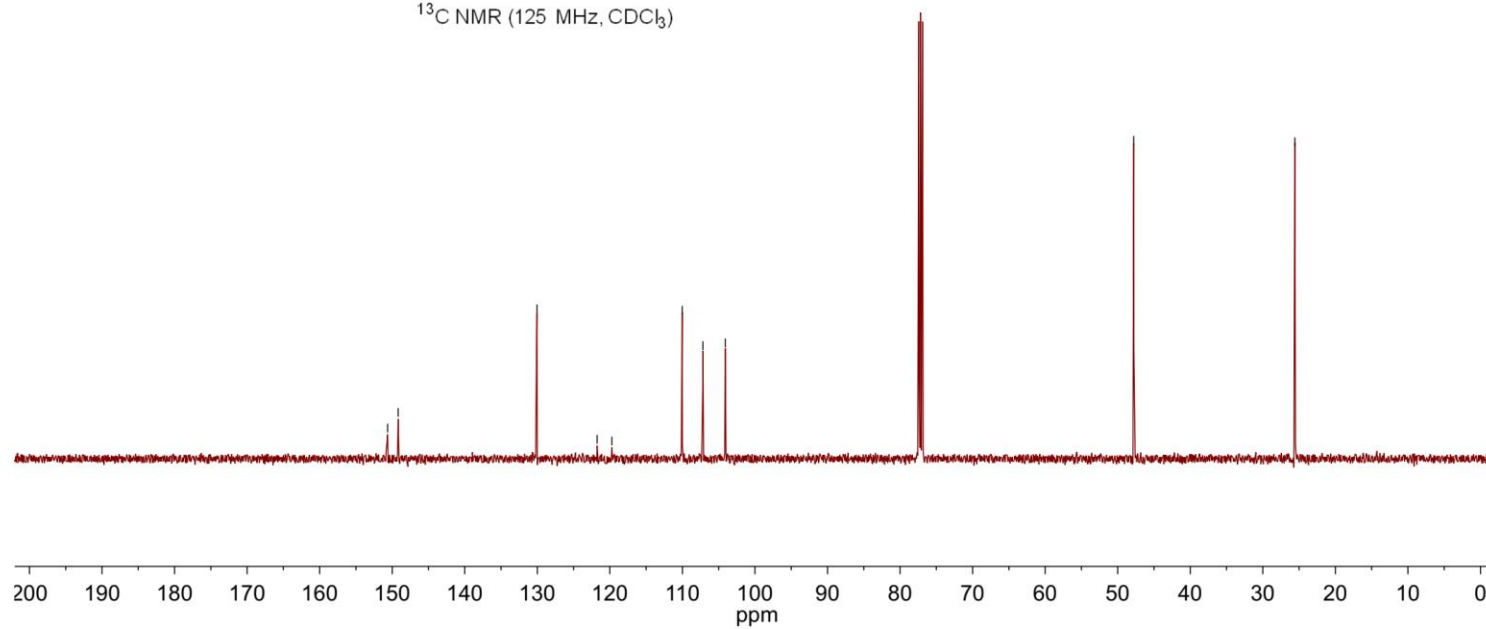

### 1-(4-Fluorophenyl)pyrrolidine (101)

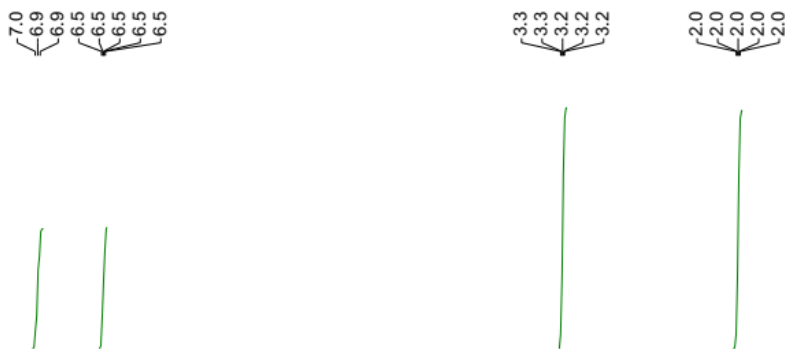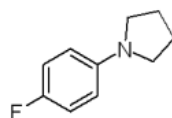

<sup>1</sup>H NMR (500 MHz, CDCl<sub>3</sub>)

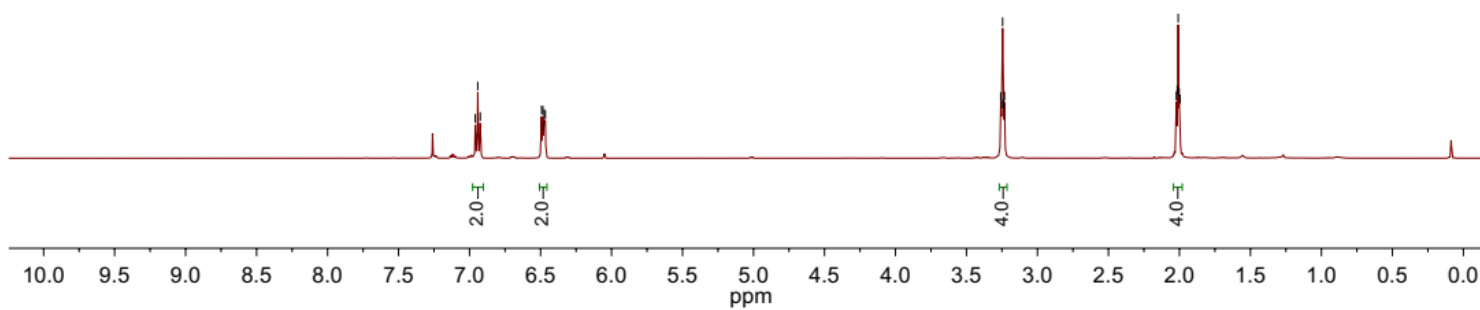

# 1-(4-Fluorophenyl)pyrrolidine (101)

155.9  
154.0

144.9

115.7  
115.5  
112.2  
112.1

48.2

25.6

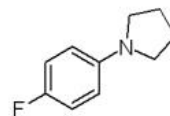

<sup>13</sup>C NMR (125 MHz, CDCl<sub>3</sub>)

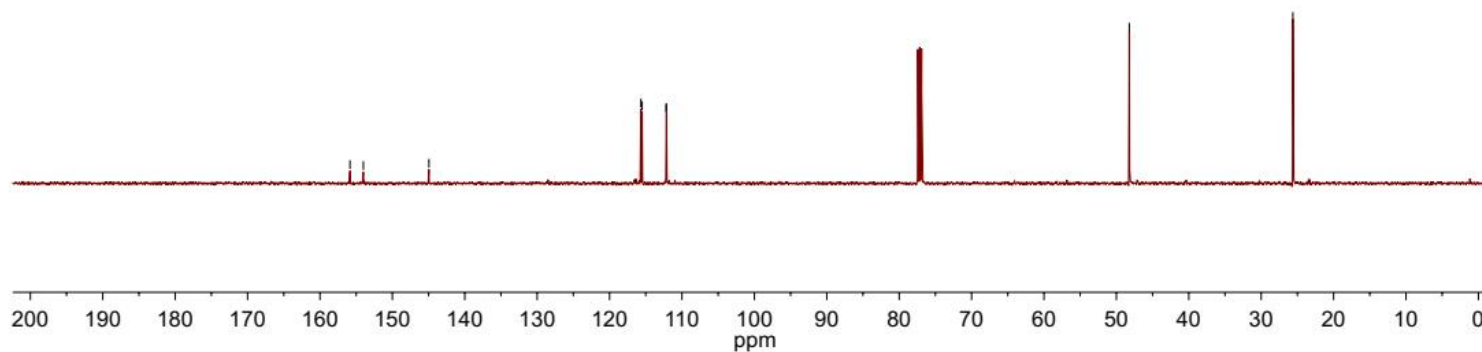

[Go back to table of contents](#)

### 1-(3-(Methylthio)phenyl)pyrrolidine (102)

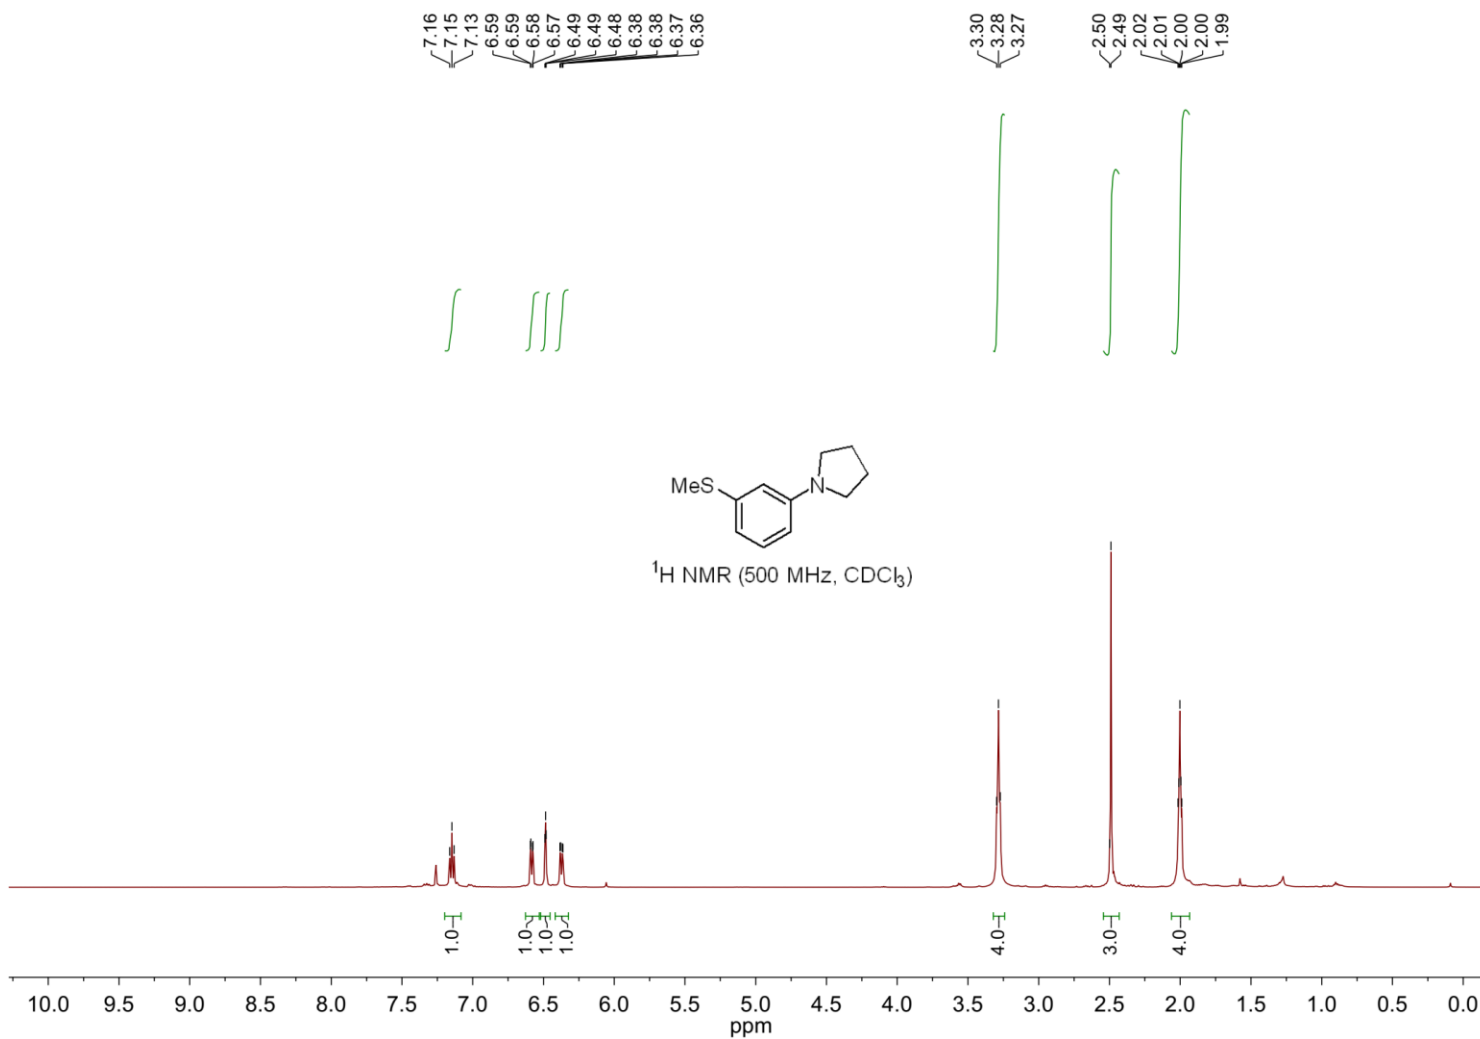



### 1-(3-Methoxyphenyl)pyrrolidine (103)

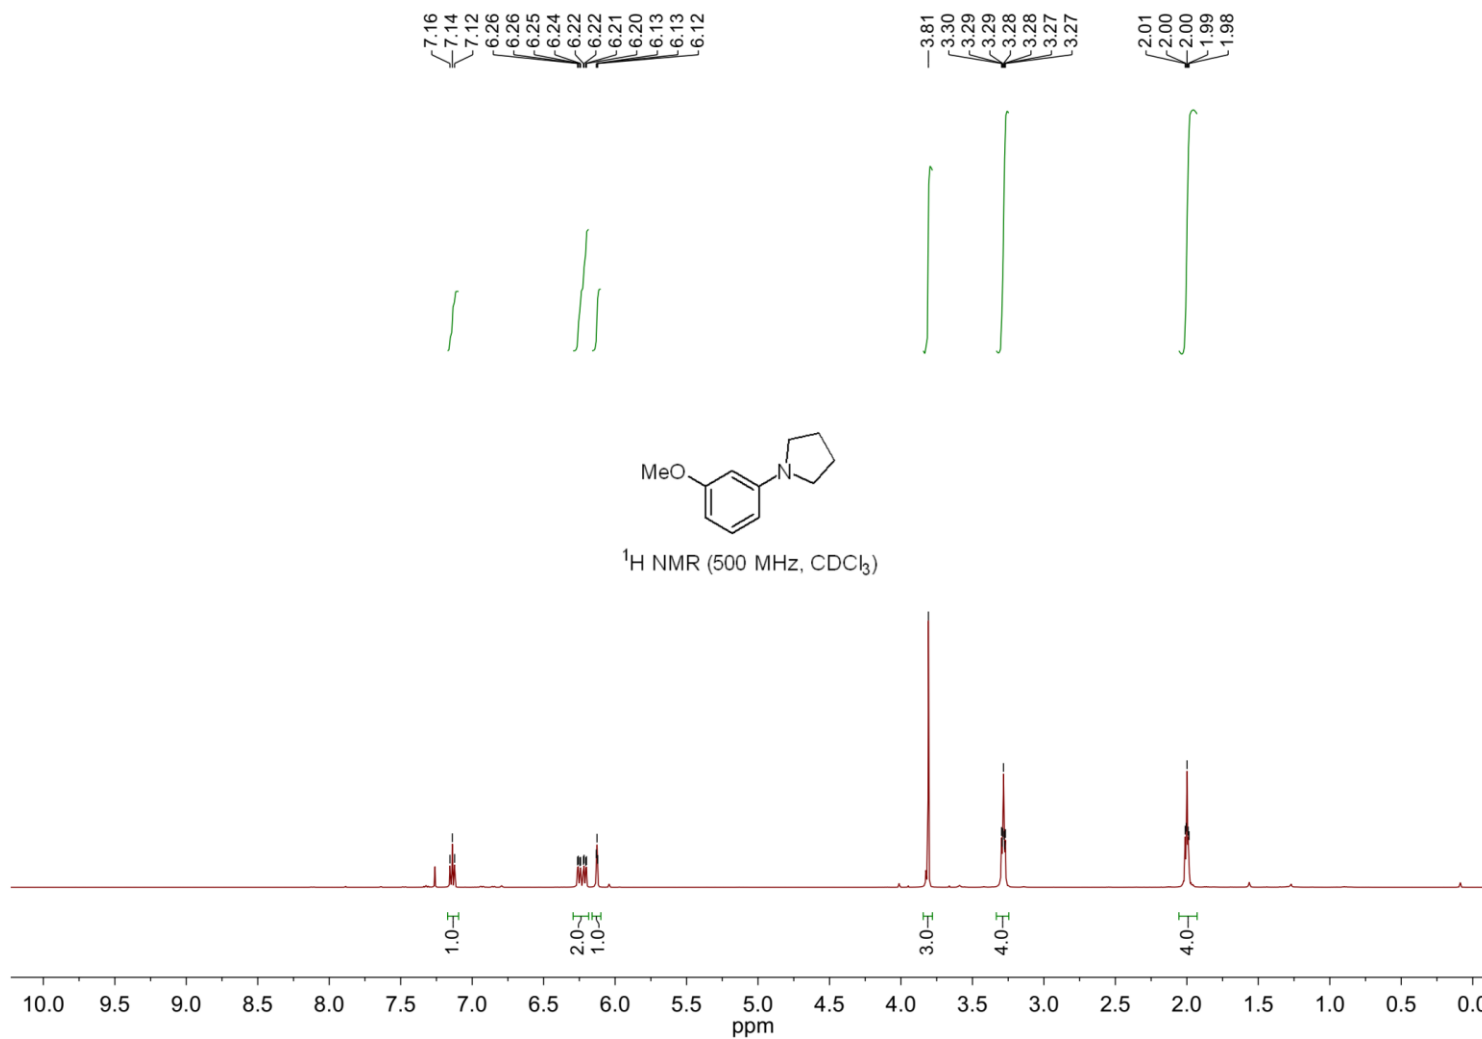

### 1-(3-Methoxyphenyl)pyrrolidine (103)

—160.9  
—149.4  
—129.9  
—105.1  
—100.6  
—98.0  
—55.2  
—47.8  
—25.6

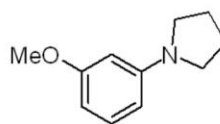

<sup>13</sup>C NMR (125 MHz, CDCl<sub>3</sub>)

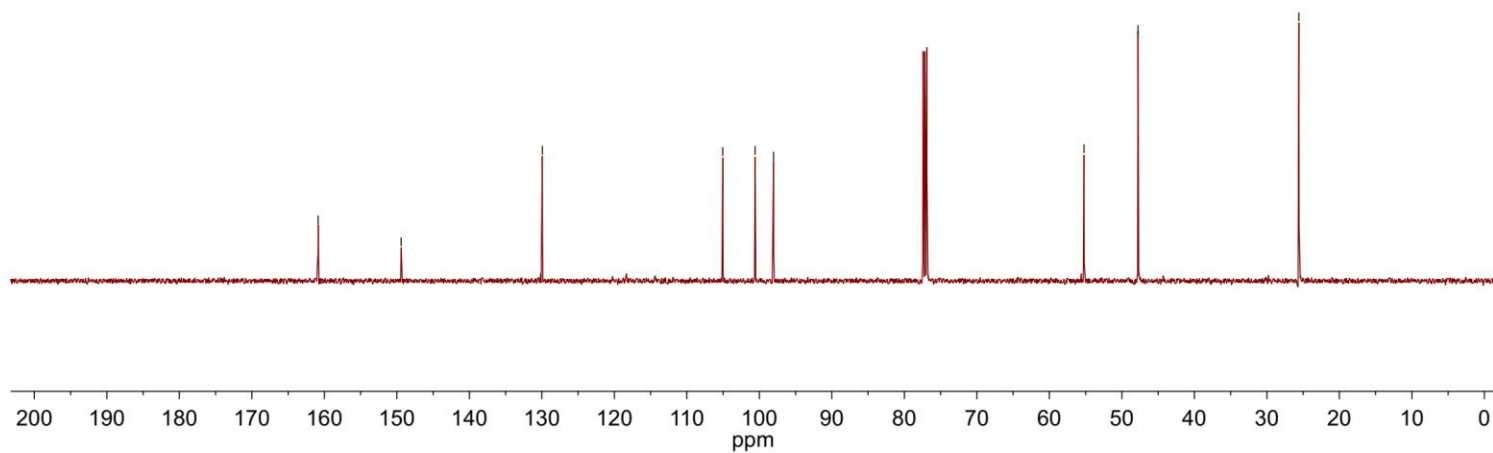

[Go back to table of contents](#)



### 1-(3,4-Dimethylphenyl)pyrrolidine (104)

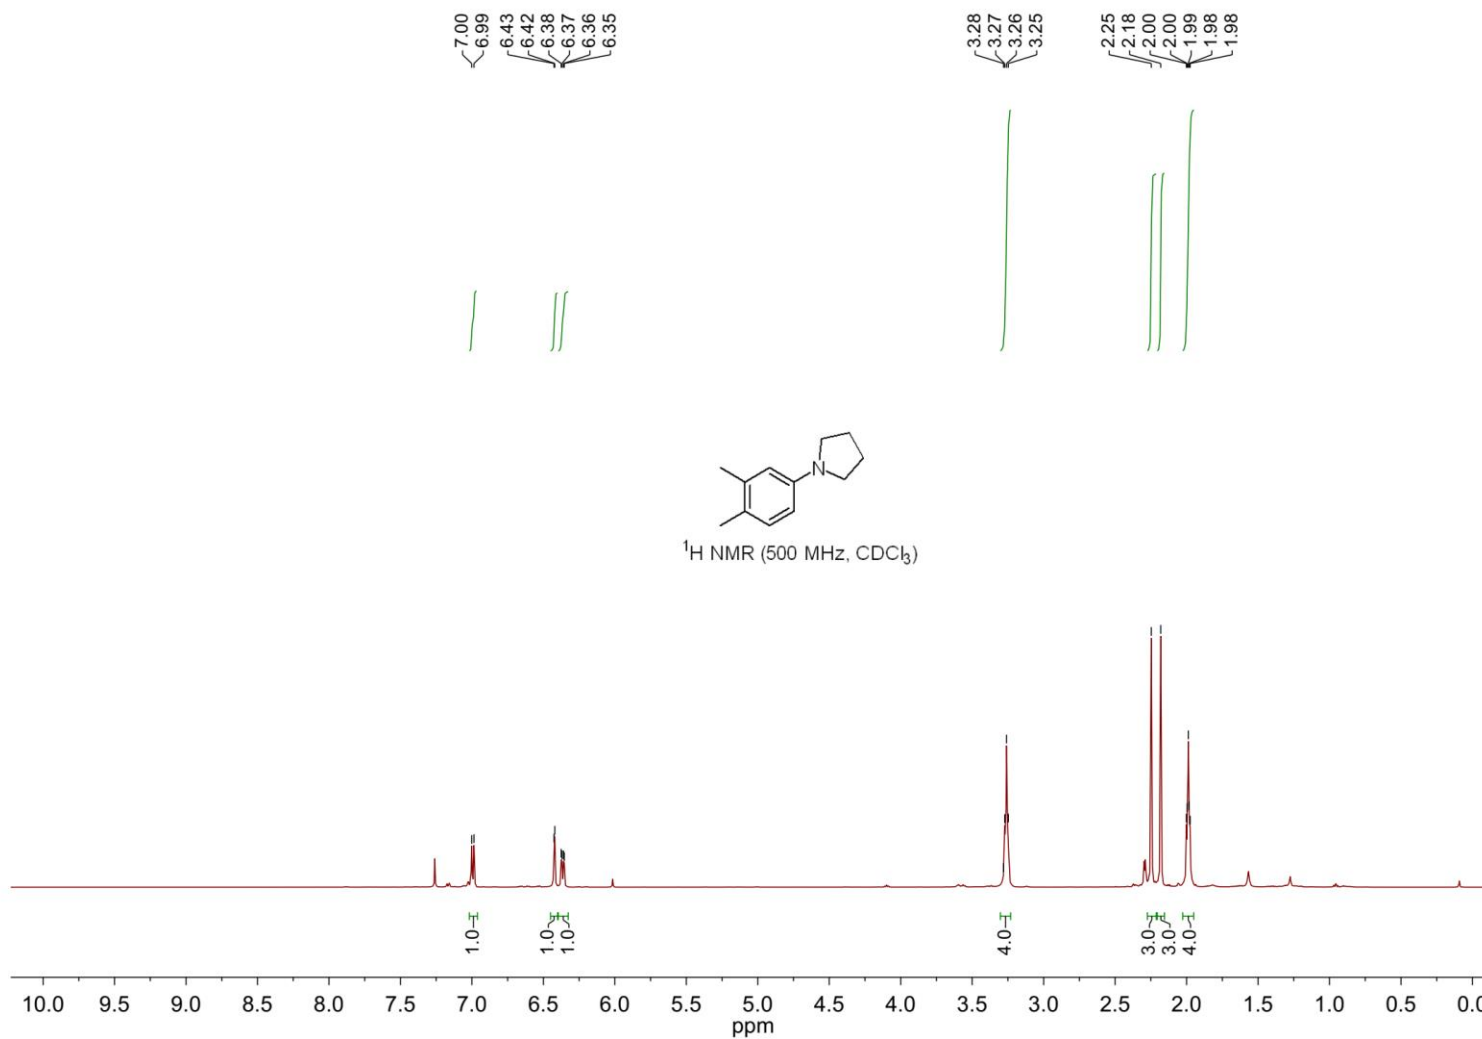

### 1-(3,4-Dimethylphenyl)pyrrolidine (104)

—146.8  
—137.2  
130.4  
130.3  
—123.4  
—113.5  
—109.4  
  
—47.9  
  
25.5  
20.4  
18.7

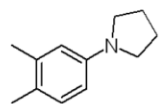

<sup>13</sup>C NMR (125 MHz, CDCl<sub>3</sub>)

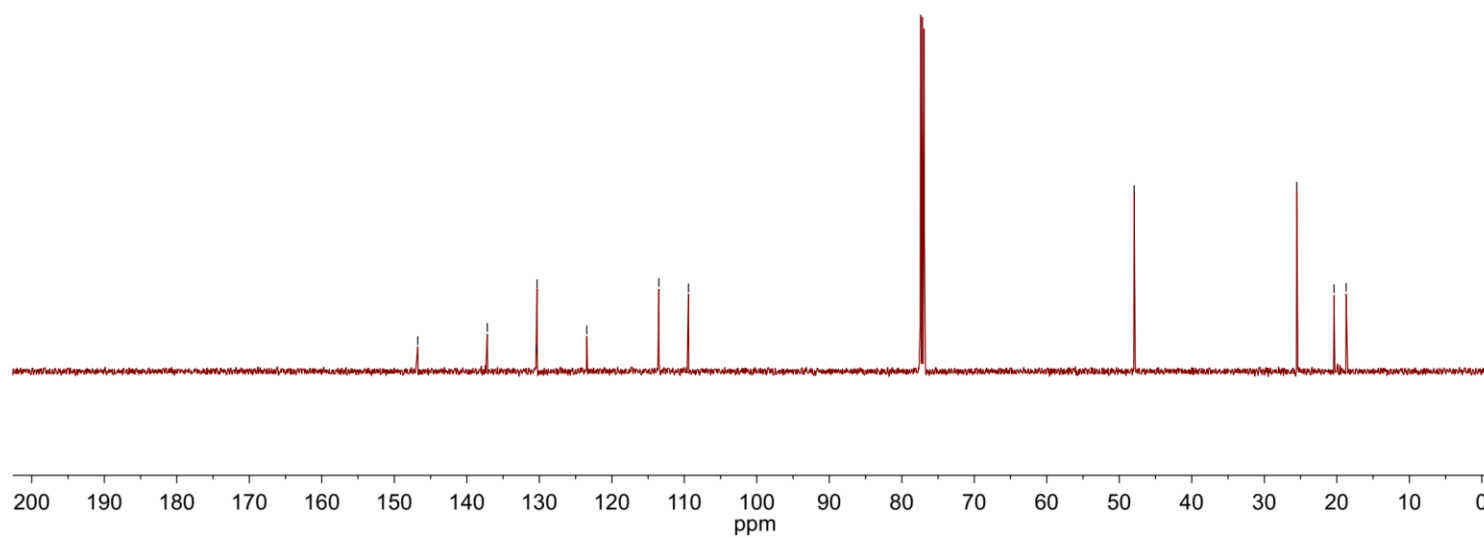

[Go back to table of contents](#)

### 1-(3,4,5-Trimethylphenyl)pyrrolidine (105)

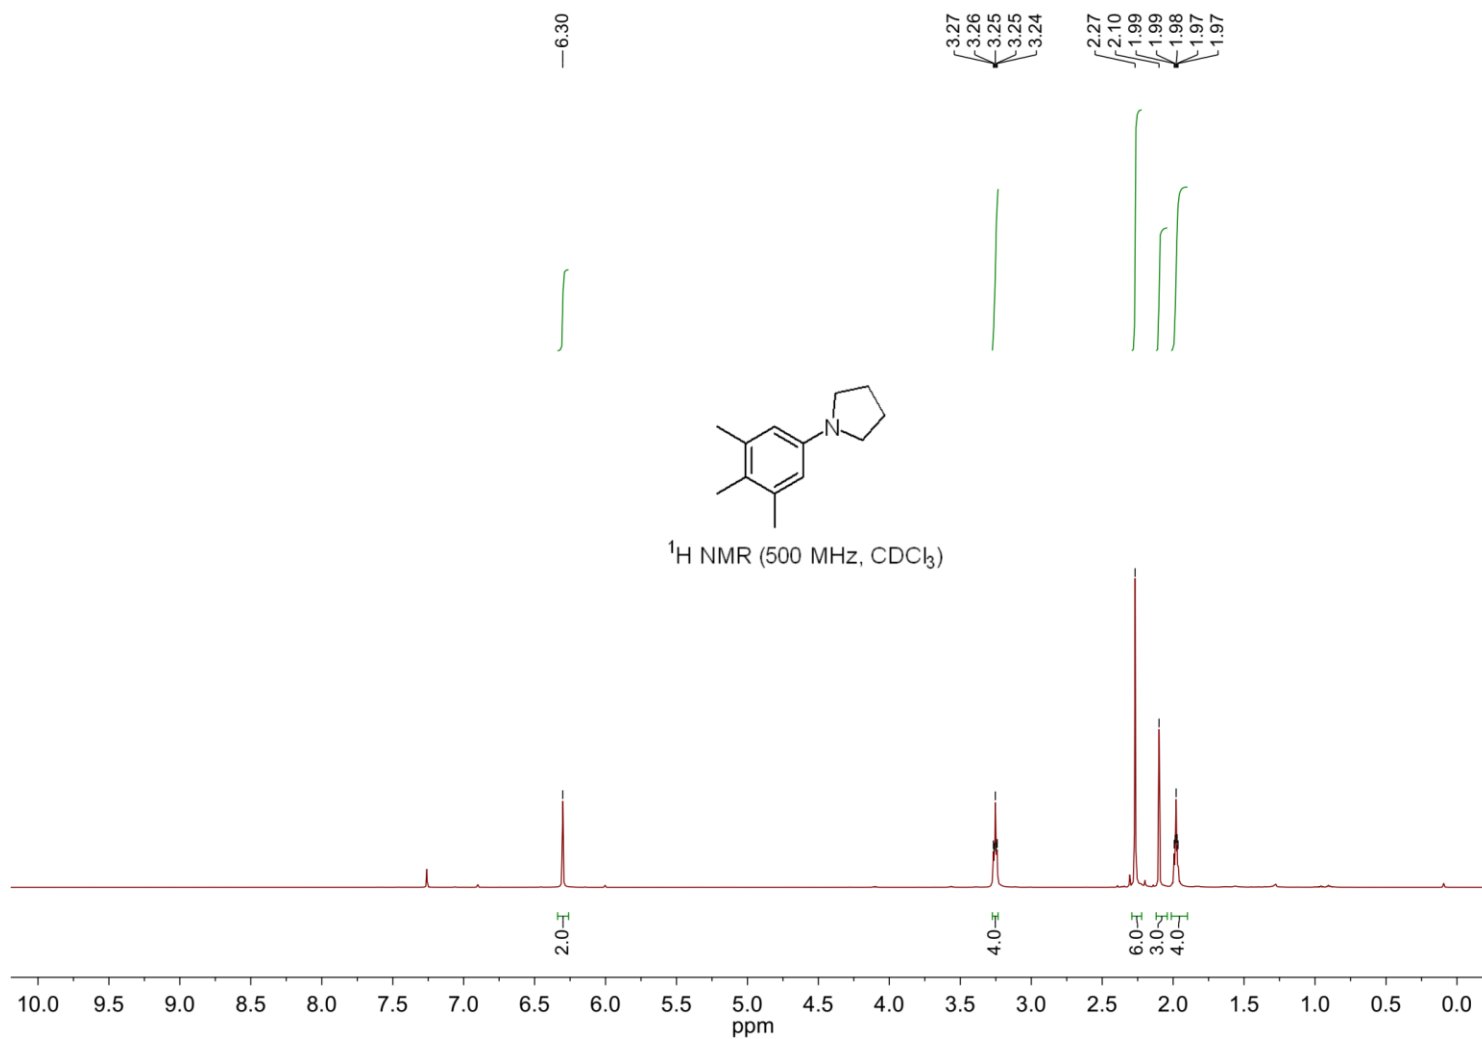

### 1-(3,4,5-Trimethylphenyl)pyrrolidine (105)

—146.2      —137.1      —122.1      —111.5                      —47.9                      —25.5      —21.2      —14.4

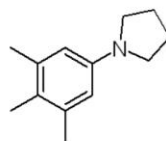

<sup>13</sup>C NMR (125 MHz, CDCl<sub>3</sub>)

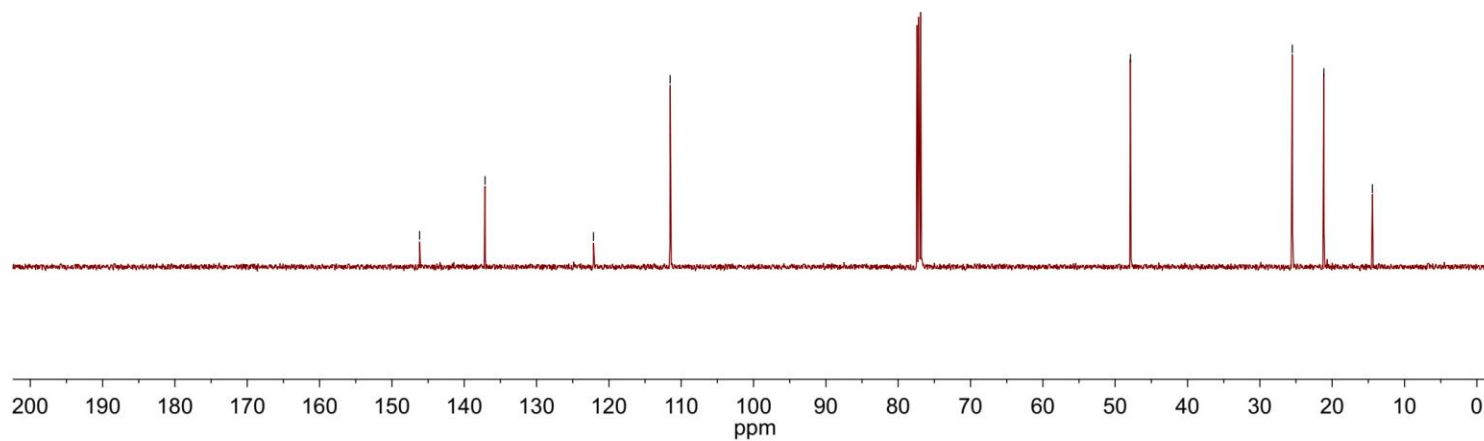

[Go back to table of contents](#)

### 3-Ethyl-3-(4-(pyrrolidin-1-yl)phenyl)piperidine-2,6-dione (106)

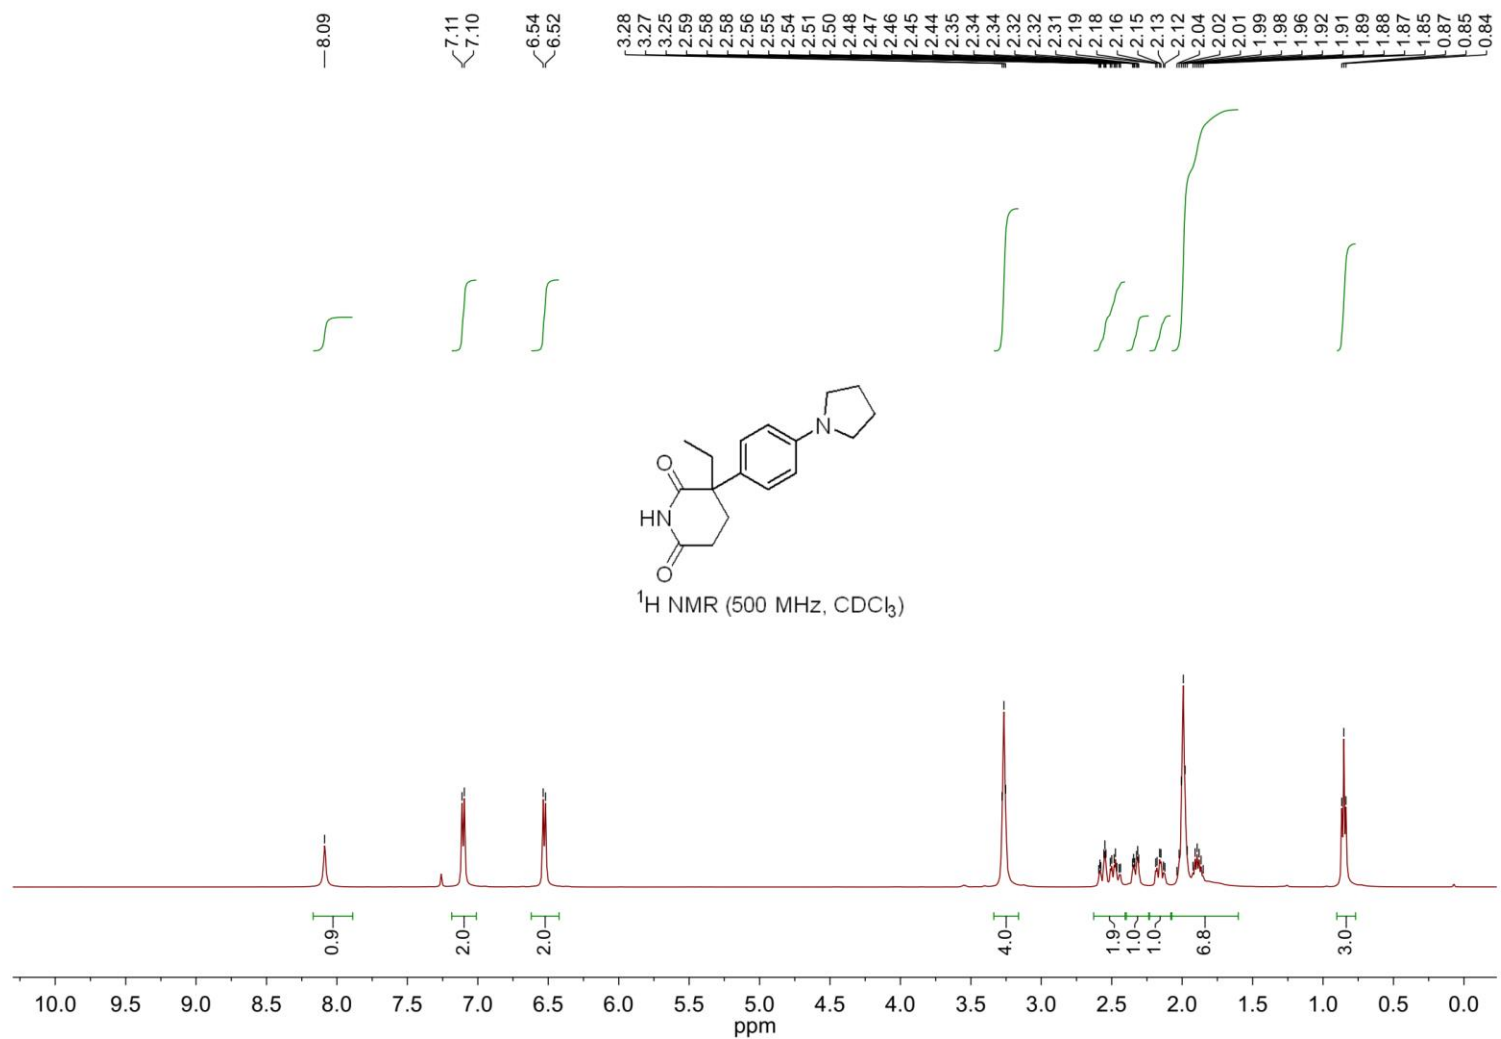

### 3-Ethyl-3-(4-(pyrrolidin-1-yl)phenyl)piperidine-2,6-dione (106)

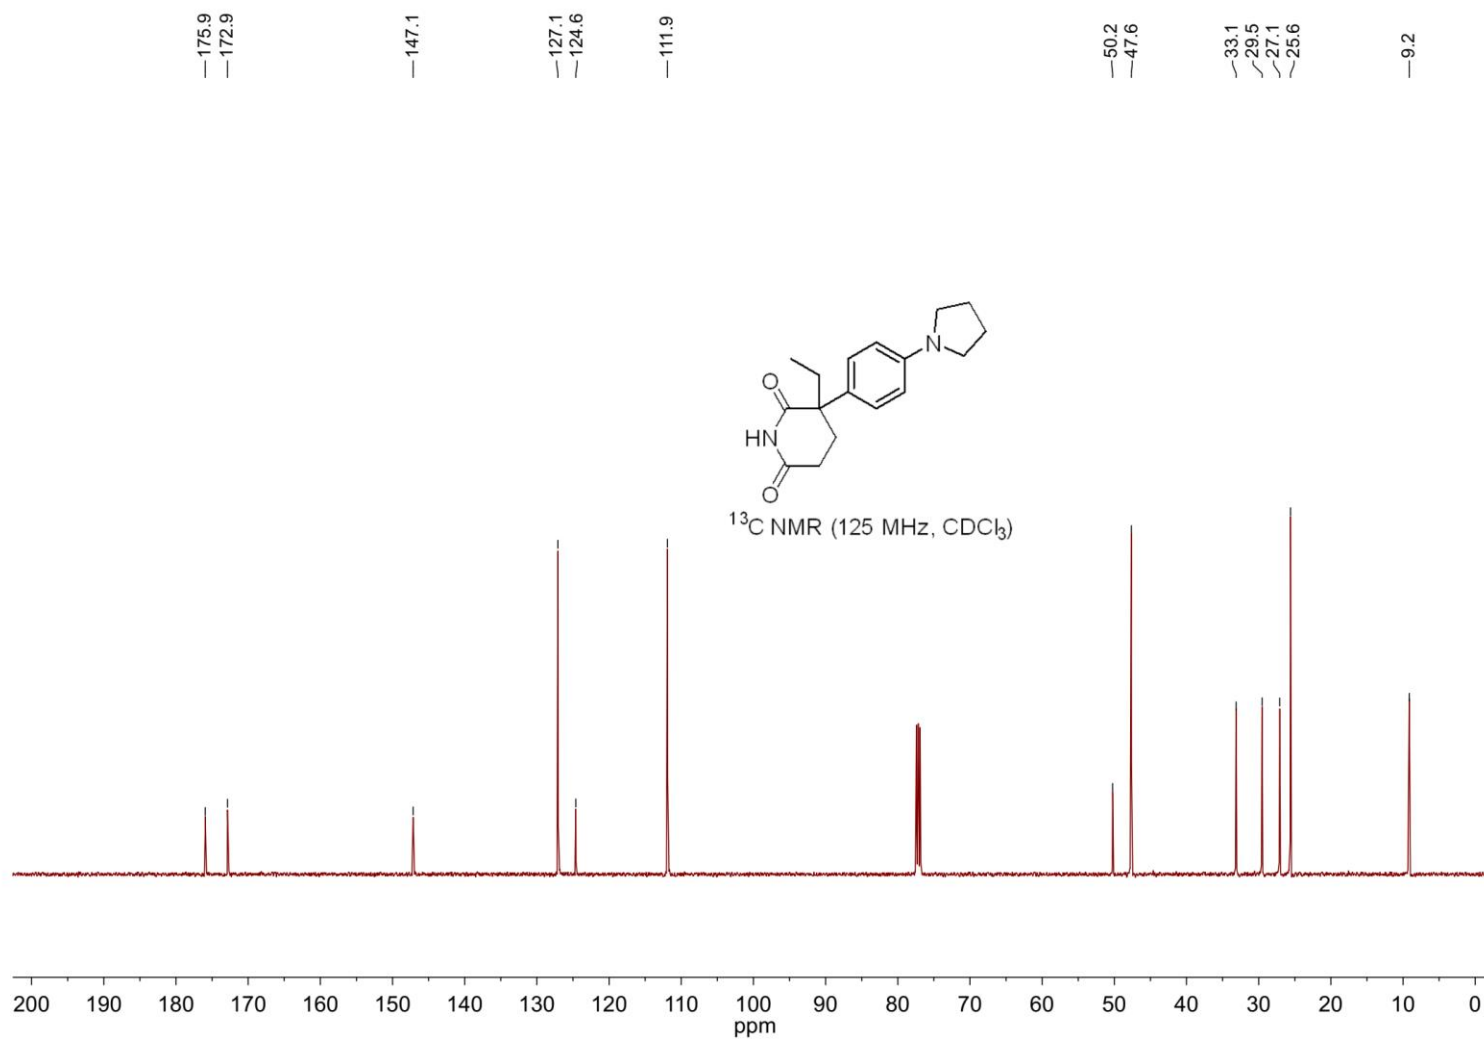

[Go back to table of contents](#)

# N-(2-Methoxycyclohexyl)-4-methylaniline (S5)

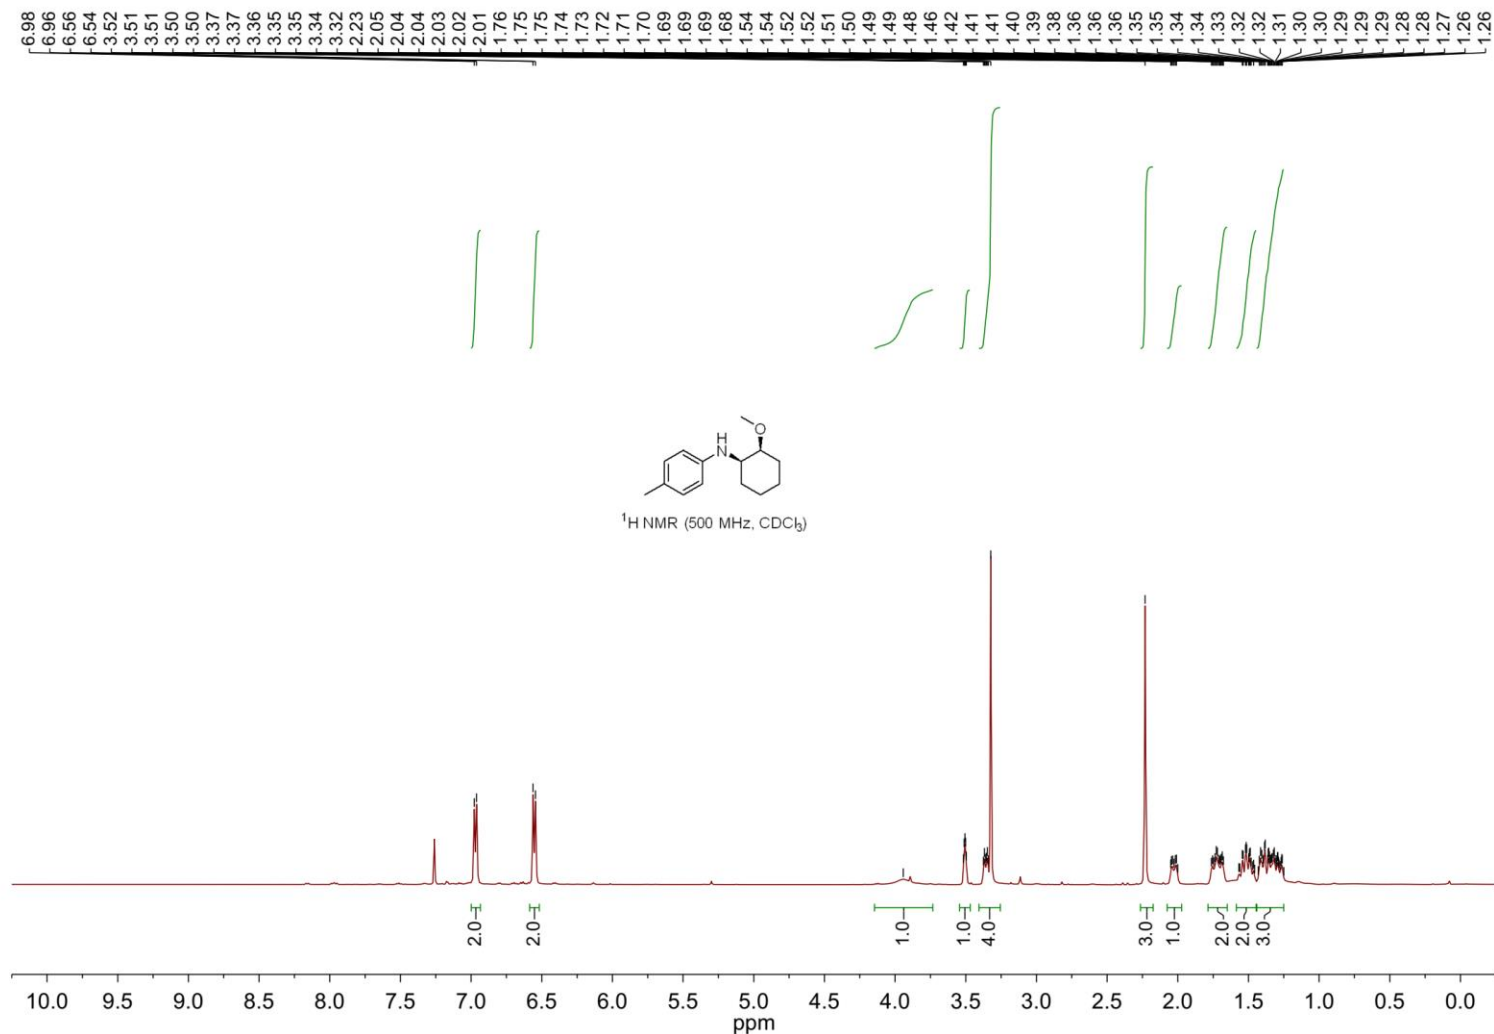

### 4-Methyl-N-((1S\*,2S\*)-2-methylcyclohexyl)aniline (S5)

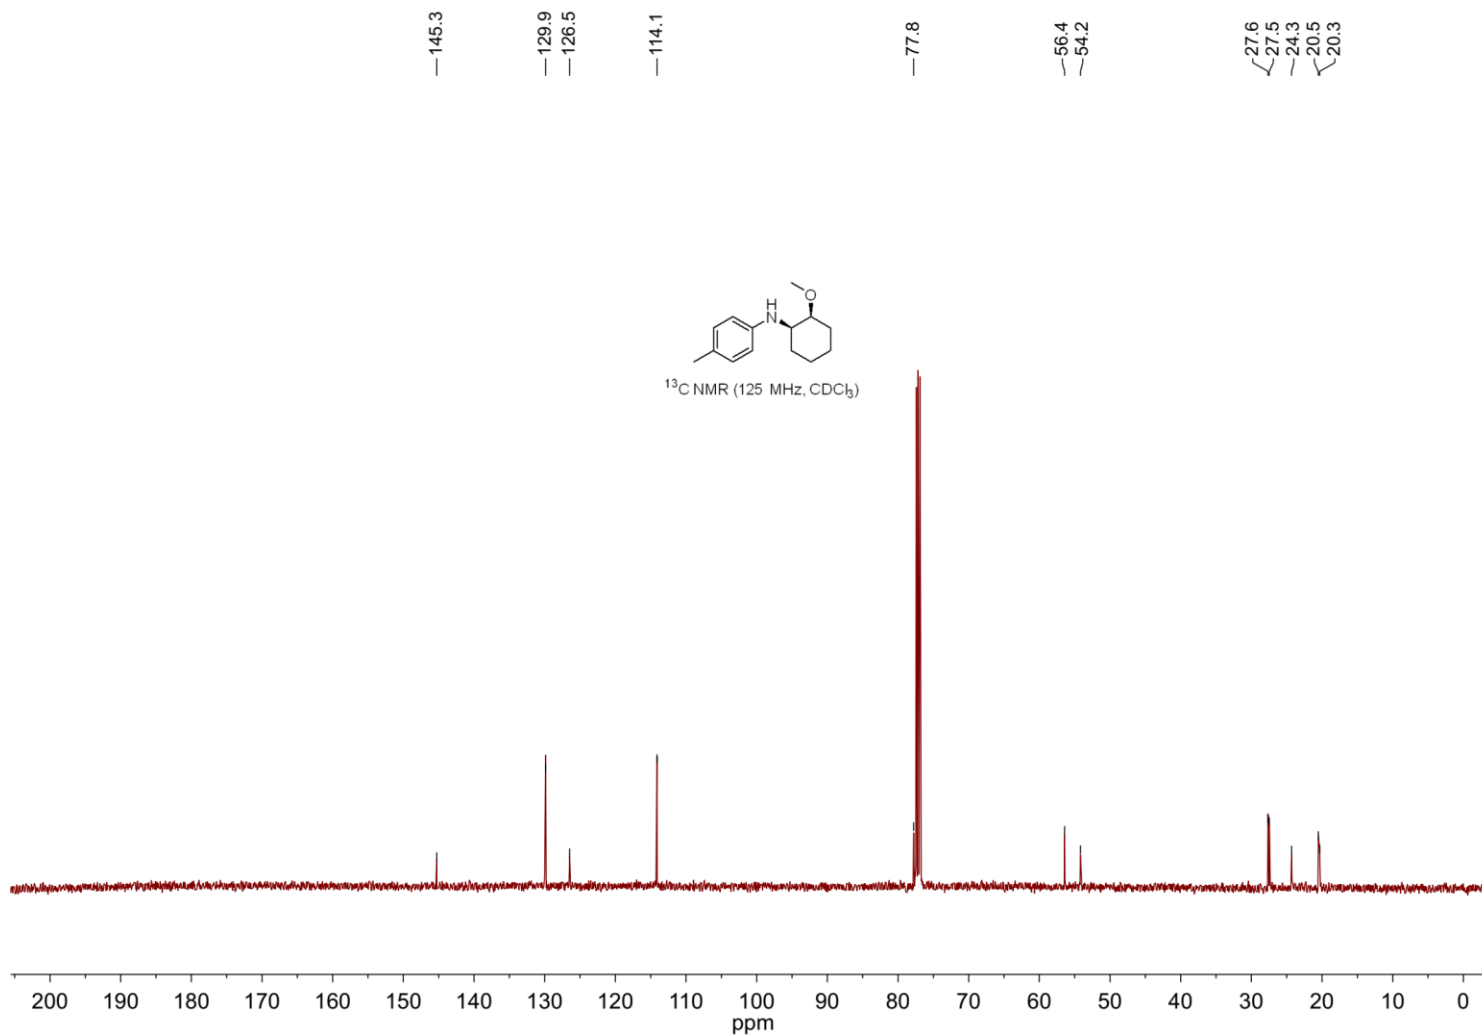

[Go back to table of contents](#)



### 4-Methyl-N-((1S\*,2S\*)-2-methylcyclohexyl)aniline (S5)

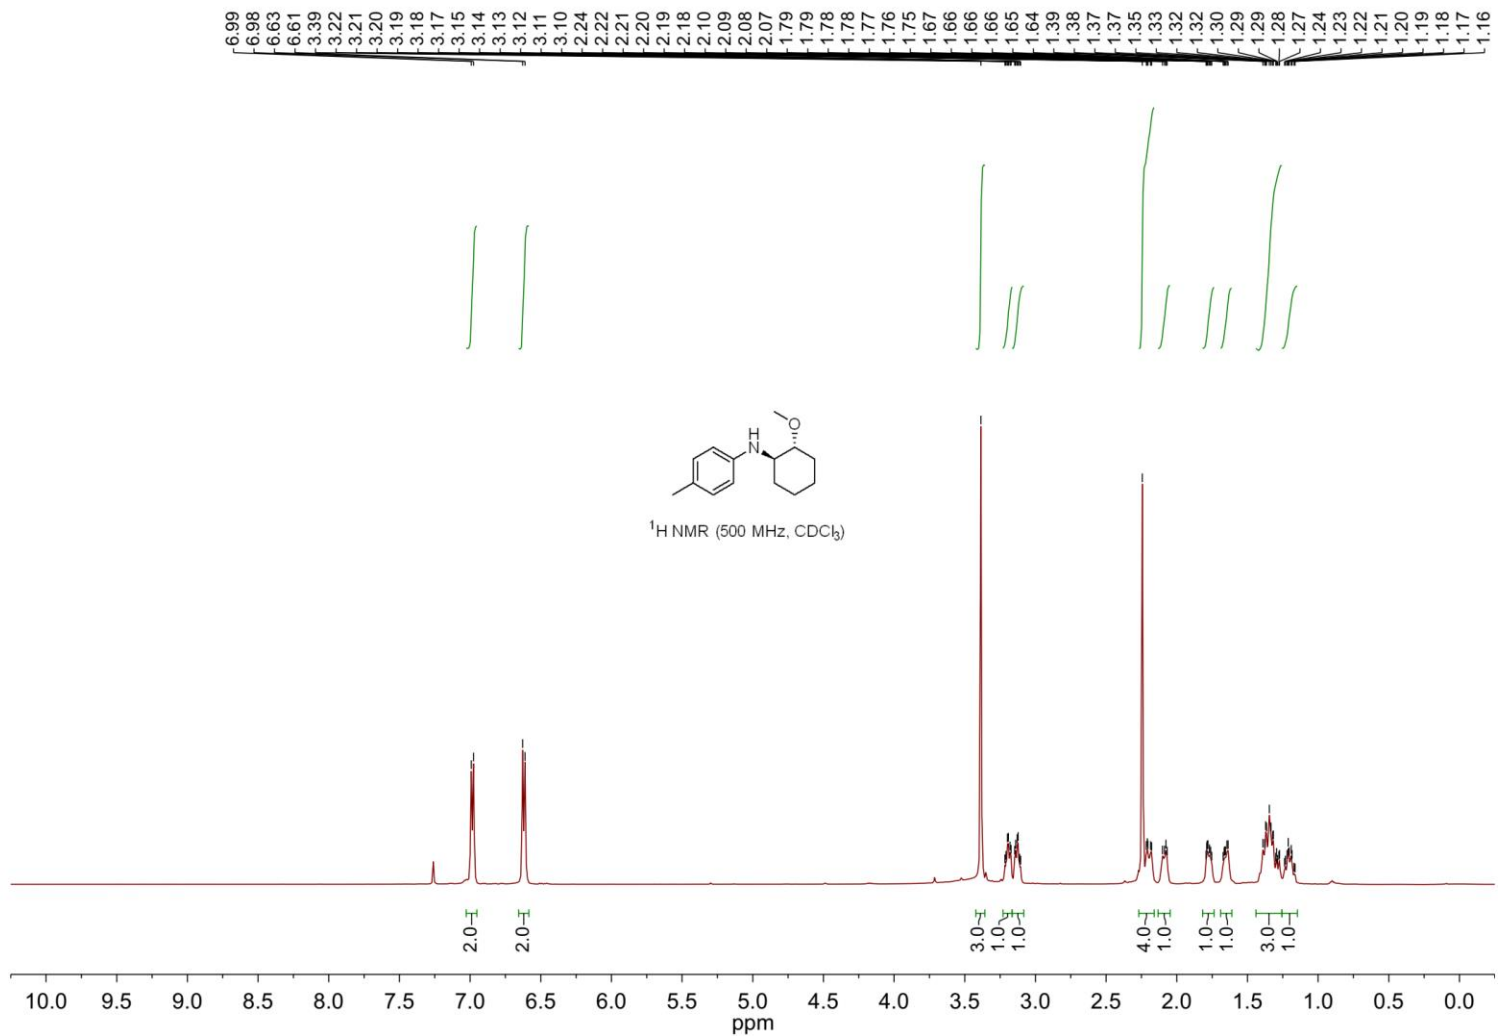

[Go back to table of contents](#)

### 4-Methyl-N-((1S\*,2S\*)-2-methylcyclohexyl)aniline (S5)

— 145.8  
— 129.7  
— 126.9  
— 114.4  
— 82.2  
— 57.0  
— 56.3  
— 31.3  
— 29.1  
— 23.9  
— 23.8  
— 20.5

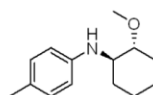

<sup>13</sup>C NMR (125 MHz, CDCl<sub>3</sub>)

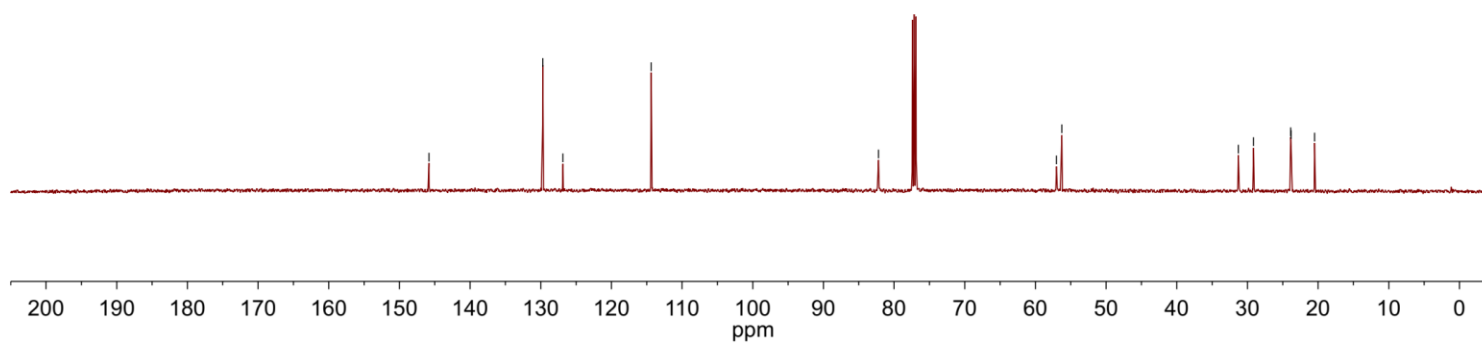

[Go back to table of contents](#)

### ***N*-(But-3-en-1-yl)-4-methylaniline (S6)**

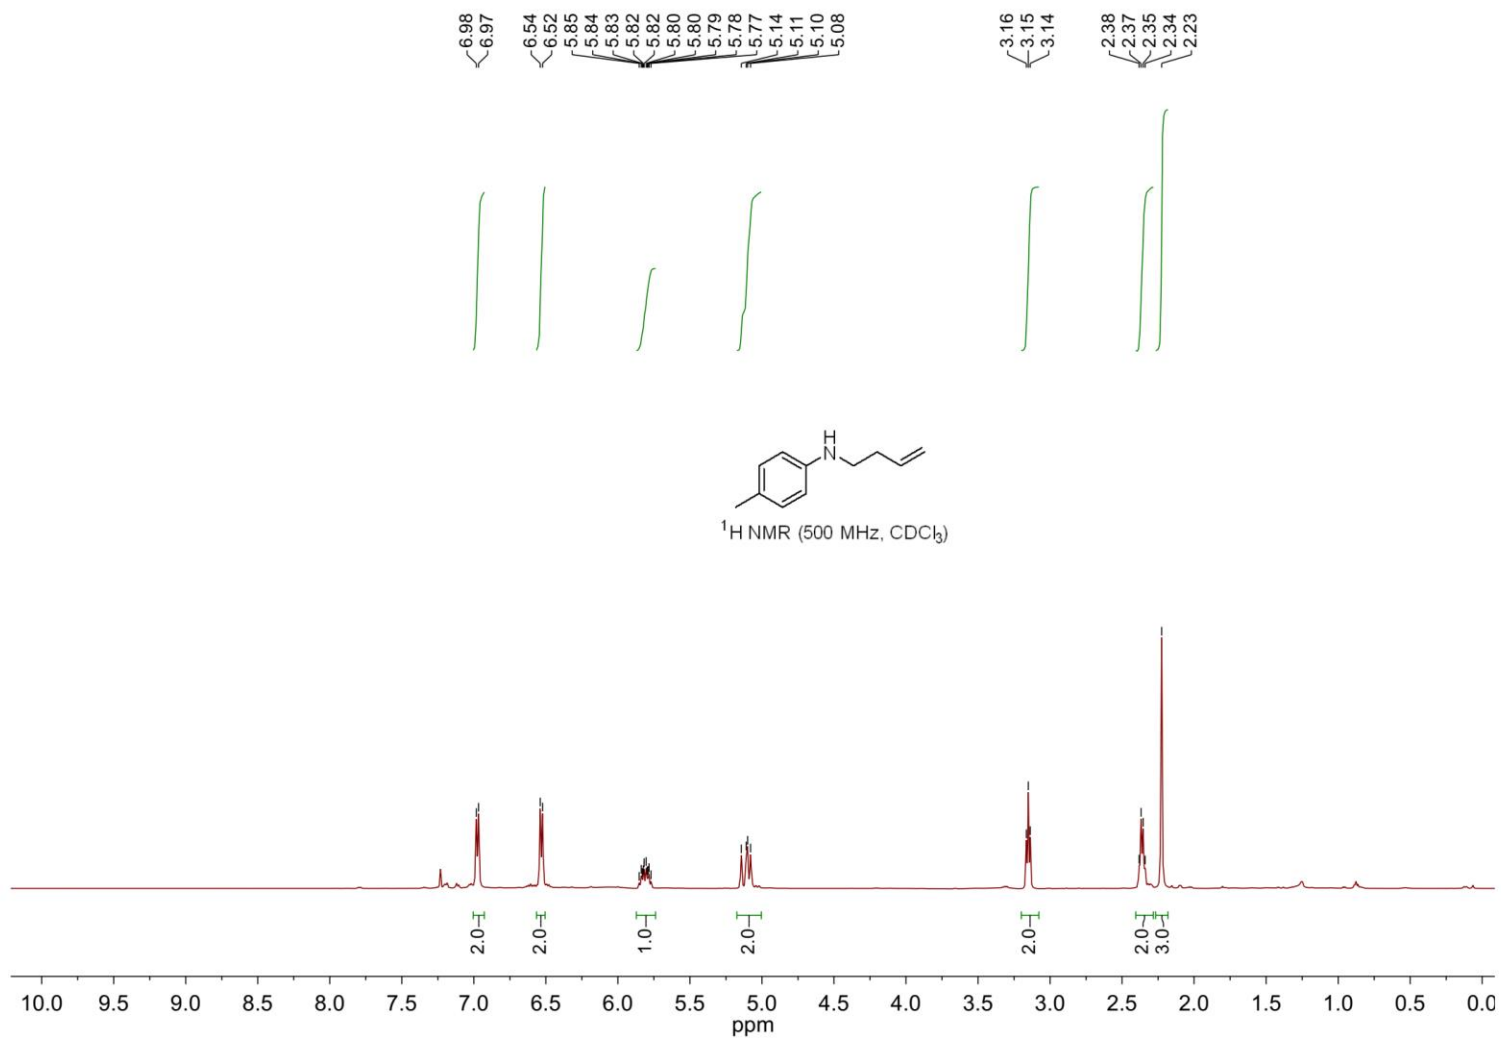

[Go back to table of contents](#)

### *N*-(But-3-en-1-yl)-4-methylaniline (S6)

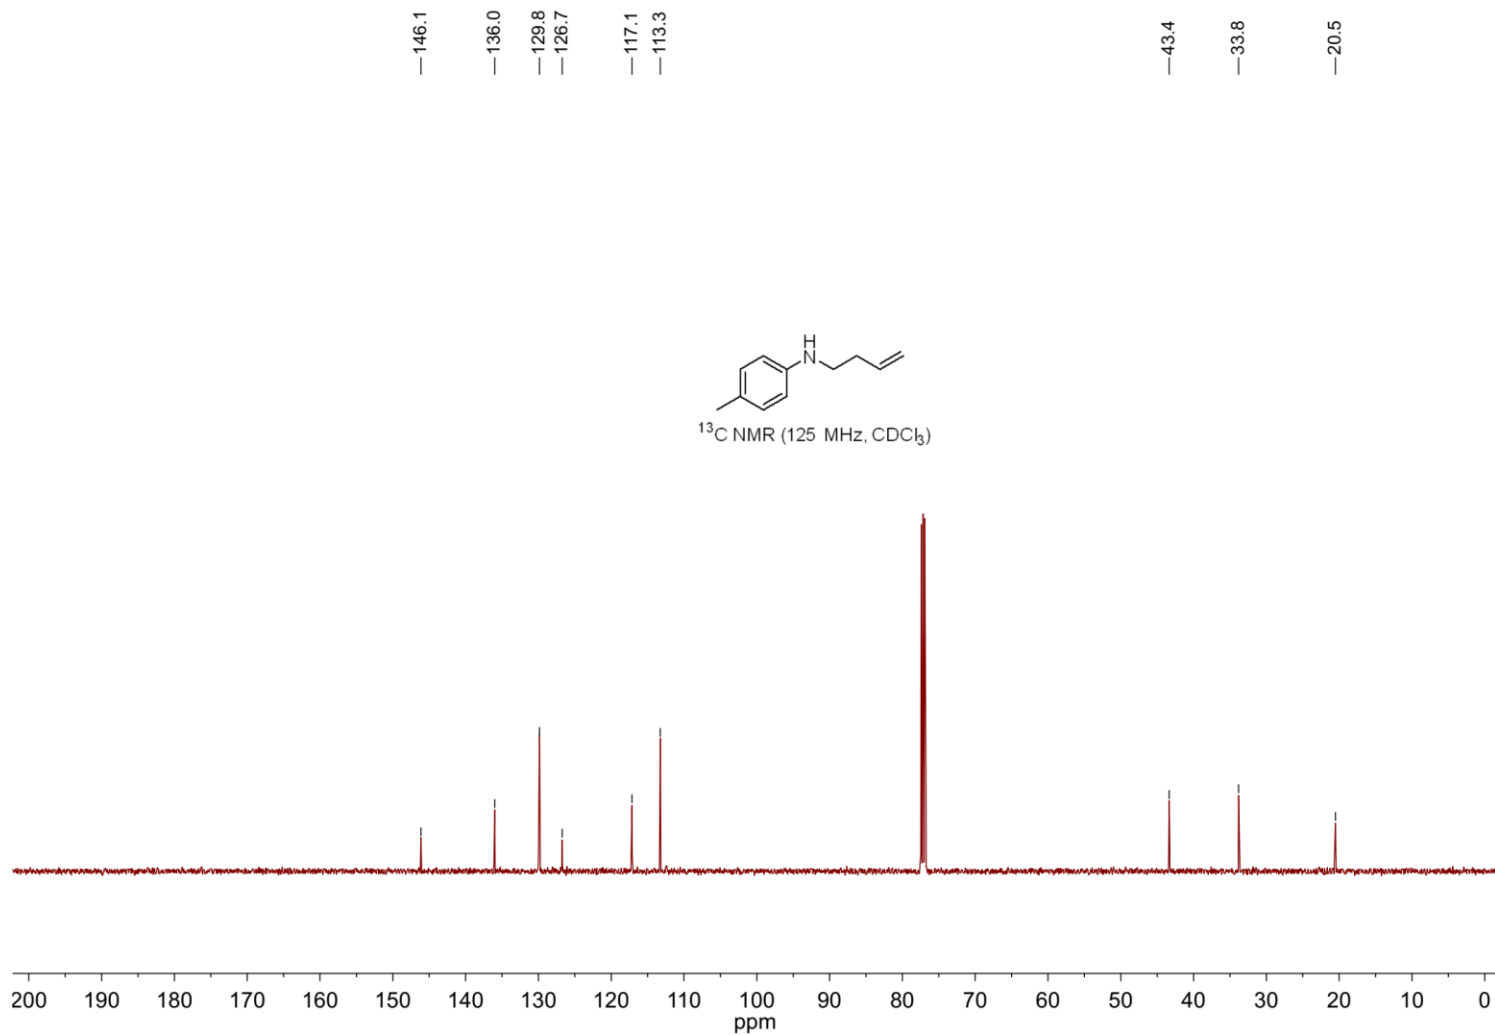

[Go back to table of contents](#)

***N*-(Cyclopentylmethyl)-4-methylaniline (S7) and *N*-(hex-5-en-1-yl)-4-methylaniline (S8)**

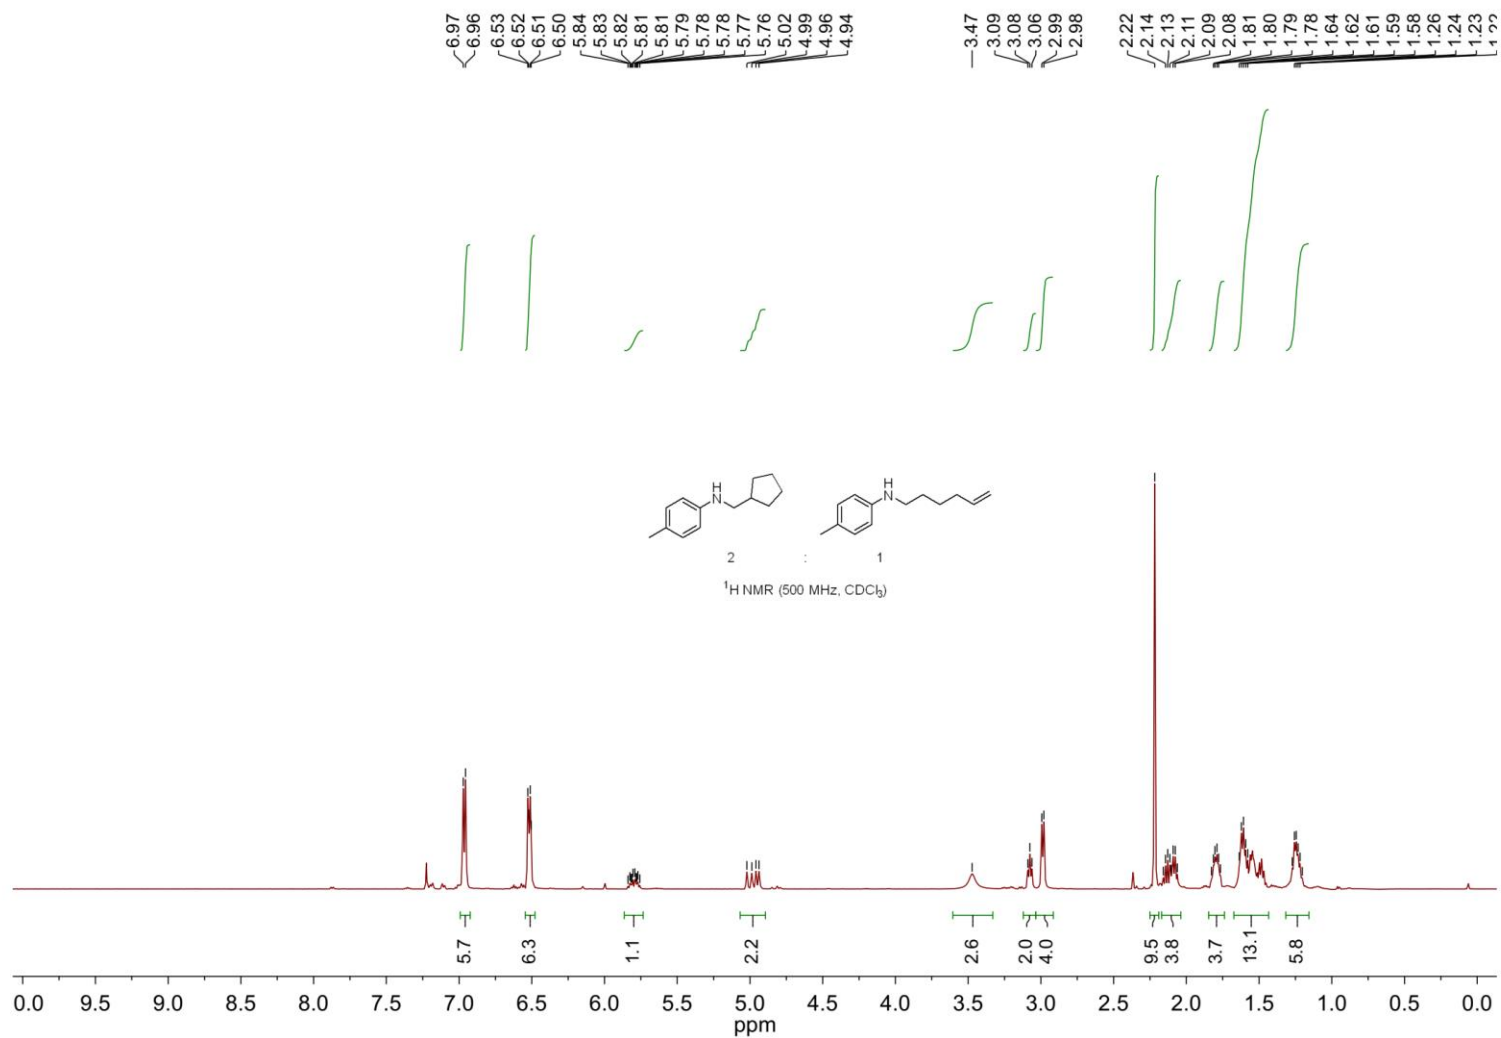



## References

- [1] V. T. Nguyen, V. D. Nguyen, G. C. Haug, H. T. Dang, S. Jin, Z. Li, C. Flores-Hansen, B. S. Benavides, H. D. Arman, O. V. Larionov, *ACS Catal.* **2019**, *9*, 9485–9498.
- [2] G. G. Liñares, M. A. Zígolo, L. Simonetti, S. A. Longhi, A. Baldessari, *Bioorg. Med. Chem.* **2015**, *23*, 4804–4814.
- [3] E. M. Espinoza, J. A. Clark, J. Soliman, J. B. Derr, M. Morales, V. I. Vullev. *J. Electrochem. Soc.* **2019**, *166*, H3175–H3187.
- [4] M. Neus Piña, B. Soberats, C. Rotger, P. Ballester, P. M. Deyà, A. Costa, *New J. Chem.* **2008**, *32*, 1919–1923.
- [5] M. Agorrody, *Can. J. Chem.* **1987**, *65*, 694–700.
- [6] C. Hansch, A. Leo, R. W. Taft, *Chem. Rev.* **1991**, *91*, 165–195.
- [7] O. Kronja, M. Biruš, M. Saunders, *J. Chem. Soc., Perkin Trans. 2*, **1999**, 1375–1379.
- [8] For a similar approach to the analysis of the carbocationic and radical pathways of decarboxylative functionalization, see: S. Shibutani, T. Kodo, M. Takeda, K. Nagao, N. Tokunaga, Y. Sasaki, H. Ohmiya, *J. Am. Chem. Soc.* **2020**, *142*, 1211–1216.
- [9] Y. Sunesson, E. Limé, S. O. Nilsson Lill, R. E. Meadows, P.-O. Norrby, *J. Org. Chem.* **2014**, *79*, 11961–11969.
- [10] (a) H. Kawai, W. J. Wolf, A. G. DiPasquale, M. S. Winston, F. D. Toste, *J. Am. Chem. Soc.* **2016**, *138*, 587–593. (b) J. H. Kim, R. T. Mertens, A. Agarwal, S. Parkin, G. Berger, S. G. Awuah, *Dalton Trans.* **2019**, *48*, 6273–6282.
- [11] R. Mao, A. Frey, J. Balon, X. Hu, *Nat. Catal.* **2018**, *1*, 120–126.
- [12] G. M. Bisset, V. Bavetsias, T. J. Thornton, K. Pawelczak, A. H. Calvert, L. R. Hughes, A. L. Jackman, *J. Med. Chem.* **1994**, *37*, 3294–3302.
- [13] W. Yao, L. He, D. Han, A. Zhong, *J. Org. Chem.* **2019**, *84*, 14627–14635.

- [14] R. Arundhathi, D. C. Kumar, B. Sreedhar, *Eur. J. Org. Chem.* **2010**, *19*, 3621–3630.
- [15] J. Dong, Z. Wu, Z. Liu, P. Liu, P. Sun, *J. Org. Chem.* **2015**, *80*, 12588–12593.
- [16] W. Yamakoshi, M. Arisawa, K. Murai, *Org. Lett.* **2019**, *21*, 3023–3027.
- [17] I. I. Jevtić, L. Došen-Mićović, E. R. Ivanović, M. D. Ivanović, *Synthesis* **2016**, *48*, 1550–1560.
- [18] C. Uncuta, T. S. Balaban, A. Petride, F. Chiraleu, A. T. Balaban, *Rev. Roum. Chim.* **1989**, *34*, 1425–1437.
- [19] X. Ding, M. Huang, Z. Yi, D. Du, X. Zhu, Y. Wan, *J. Org. Chem.* **2017**, *82*, 5416–5423.
- [20] C. Li, Y. Kawamata, H. Nakamura, J. C. Vantourout, Z. Liu, Q. Hou, D. Bao, J. T. Starr, J. Chen, M. Yan, P. S. Baran, *Angew. Chem., Int. Ed.* **2017**, *56*, 13088–13093.
- [21] C. L. Bailey, A. Y. Joh, Z. Q. Hurley, C. L. Anderson, B. Singaram, *J. Org. Chem.* **2016**, *81*, 3619–3628.
- [22] S. Bayindir, E. Erdogan, H. Kilic, O. Aydin, N. Saracoglu, *J. Heterocycl. Chem.* **2015**, *52*, 1589–1594.
- [23] J. Cheng, X. Deng, G. Wang, Y. Li, X. Cheng, G. Li, *Org. Lett.* **2016**, *18*, 4538–4541.
- [24] I. Sorribes, J. R. Cabrero–Antonino, C. Vicent, K. Junge, M. Beller, *J. Am. Chem. Soc.* **2015**, *137*, 13580–13587.
- [25] P. Weber, T. Scherpf, I. Rodstein, D. Lichte, L. T. Scharf, L. J. Gooßen, V. H. Gessner, *Angew. Chem., Int. Ed.* **2019**, *58*, 3203–3207.
- [26] E. R. Biehl, A. Razzuk, M. V. Jovanovic, S. P. Khanapure, *J. Org. Chem.* **1986**, *51*, 5157–5160.
- [27] Z. Qiu, J. S. Li, C. J. Li, *Chem. Sci.* **2017**, *8*, 6954–6958.
- [28] S. Huang, X. Hong, H. Z. Cui, Q. Zhou, Y. J. Lin, X. F. Hou, *Dalton Trans.* **2019**, *48*, 5072–5082.



- [29] F. Hollywood, B. Nay, E. F. Scriven, H. Suschitzky, Z. U. Khan, R. Hull, *J. Chem. Soc., Perkin Trans. 1* **1982**, 421–429.
- [30] V. I. Uzgiris, P. E. Graves, H. A. Salhanick, *Biochemistry* **1977**, *16*, 593–600.
- [31] J. P. Dinnocenzo, S. B. Karki, J. P. Jones, *J. Am. Chem. Soc.* **1993**, *115*, 7111–7116.
- [32] Y. Ma, X. Yao, L. Zhang, P. Ni, R. Cheng, J. Ye, *Angew. Chem., Int. Ed. Engl.* **2019**, *58*, 16548–16552.
- [33] H. L. Li, Y. Kuninobu, M. Kanai, *Angew. Chem., Int. Ed.* **2017**, *56*, 1495–1499.
- [34] V. H. Tran, M. T. La, H. K. Kim, *Tetrahedron Lett.* **2019**, *60*, 1860–1863.
- [35] K. Matsumoto, S. Takeda, T. Hirokane, M. Yoshida, *Org. Lett.* **2019**, *21*, 7279–7283.
- [36] Y. Feng, M. I. Hussain, X. Zhang, J. Shi, W. Hu, Y. Xiong, *Tetrahedron* **2018**, *74*, 2669–2676.
- [37] M. J. Frisch, G. W. Trucks, H. B. Schlegel, G. E. Scuseria, M. A. Robb, J. R. Cheeseman, G. Scalmani, V. Barone, G. A. Petersson, H. Nakatsuji, X. Li, M. Caricato, A. V. Marenich, J. Bloino, B. G. Janesko, R. Gomperts, B. Mennucci, H. P. Hratchian, J. V. Ortiz, A. F. Izmaylov, J. L. Sonnenberg, D. Williams-Young, F. Ding, F. Lipparini, F. Egidi, J. Goings, B. Peng, A. Petrone, T. Henderson, D. Ranasinghe, V. G. Zakrzewski, J. Gao, N. Rega, G. Zheng, W. Liang, M. Hada, M. Ehara, K. Toyota, R. Fukuda, J. Hasegawa, M. Ishida, T. Nakajima, Y. Honda, O. Kitao, H. Nakai, T. Vreven, K. Throssell, Jr. J. A. Montgomery, J. E. Peralta, F. Ogliaro, M. J. Bearpark, J. J. Heyd, E. N. Brothers, K. N. Kudin, V. N. Staroverov, T. A. Keith, R. Kobayashi, J. Normand, K. Raghavachari, A. P. Rendell, J. C. Burant, S. S. Iyengar, J. Tomasi, M. Cossi, J. M. Millam, M. Klene, C. Adamo, R. Cammi, J. W. Ochterski, R. L. Martin, K. Morokuma, O. Farkas, J. B. Foresman, D. J. Fox, in *Gaussian 16*, Revision B.01, Gaussian, Inc., Wallingford CT, **2016**.

- [38] Texas Advanced Computing Center (TACC), The University of Texas at Austin.
- [39] Chemcraft – graphical software for visualization of quantum chemistry computations. <https://www.chemcraftprog.com>.
- [40] C. Y. Legault in *CYLview*, 1.0b Université de Sherbrooke, **2009** (<http://www.cylview.org>).
- [41] Y. Zhao, D. G. Truhlar, *J. Chem. Phys.* **2006**, *125*, 194101–194118.
- [42] K. Eichkorn, F. Weigend, O. Truetler, R. Ahlrichs, *Theor. Chem. Acc.* **1997**, *97*, 119–124.
- [43] F. Weigend, *Phys. Chem. Chem. Phys.* **2006**, *8*, 1057–1065.
- [44] A. V. Marenich, C. J. Cramer, D. G. Truhlar, *J. Phys. Chem. B.* **2009**, *113*, 6378–6396.
- [45] (a) S. Niu, D. L. Huang, P. D. Dau, H. T. Liu, L. S. Wang, T. Ichiye, *J Chem Theory Comput.* **2014**, *10*, 1283–1291. (b) J. Jover, *Phys.Chem.Chem.Phys.* **2017**, *19*, 29344–29353.
- [46] (a) R. A. Marcus, *J. Chem. Phys.* **1956**, *24*, 966–978. (b) R. A. Marcus, *J. Chem. Phys.* **1956**, *24*, 962–972. (c) R. A. Marcus, *J. Chem. Phys.* **1957**, *26*, 872–877. (d) N. S. Hush, *J. Chem. Phys.* **1958**, *28*, 962–972. (e) R. A. Marcus, *Can. J. Chem.* **1959**, *37*, 155–163. (f) N. S. Hush, *Trans. Faraday Soc.* **1961**, *57*, 557–580. (g) Marcus, R. A.; *Faraday Discuss. Chem. Soc.* **1982**, *74*, 7–15. (h) R. A. Marcus, N. Sutin, *Biochim. Biophys. Acta, Rev. Bioenerg.* **1985**, *811*, 265–322.
- [47] C, Costentin, M. Robert, J.-M. Savéant, *J. Electroanal. Chem.* **2006**, *2*, 197–206.
- [48] C. Costentin, M. Robert, J.-M. Saveant, C. Tard, *Phys. Chem. Chem. Phys.* **2011**, *13*, 5353–5358.
